# Supplementary material for: Pathway2Targets: an open-source pathway-based approach to repurpose therapeutic drugs and prioritize human targets
Source: PeerJ. 2023 Sep 29;11:e16088. doi: 10.7717/peerj.16088 (PMC10544355; doi:10.7717/peerj.16088)
Supplement: Supplemental Information 1 [file peerj-11-16088-s001.xlsx]

## Sheet: SuppTable1-Version1_results
Target_ID	Target_Symbol	Target_Name	Drug_ID	Drug_Name	Is_FDA_Approved	Highest_Clinical_Trial_Phase	Has_Been_Withdrawn	Pathway_DB	Pathway_Name
ENSG00000269858	EGLN2	egl-9 family hypoxia inducible factor 2	CHEMBL2338329	ROXADUSTAT	FALSE	3	FALSE	KEGG	HIF-1 signaling pathway
ENSG00000269858	EGLN2	egl-9 family hypoxia inducible factor 2	CHEMBL3646221	VADADUSTAT	FALSE	3	FALSE	KEGG	HIF-1 signaling pathway
ENSG00000269858	EGLN2	egl-9 family hypoxia inducible factor 2	CHEMBL3544988	DAPRODUSTAT	FALSE	3	FALSE	KEGG	HIF-1 signaling pathway
ENSG00000129521	EGLN3	egl-9 family hypoxia inducible factor 3	CHEMBL2338329	ROXADUSTAT	FALSE	3	FALSE	KEGG	HIF-1 signaling pathway
ENSG00000129521	EGLN3	egl-9 family hypoxia inducible factor 3	CHEMBL3646221	VADADUSTAT	FALSE	3	FALSE	KEGG	HIF-1 signaling pathway
ENSG00000129521	EGLN3	egl-9 family hypoxia inducible factor 3	CHEMBL3544988	DAPRODUSTAT	FALSE	3	FALSE	KEGG	HIF-1 signaling pathway
ENSG00000005339	CREBBP	CREB binding protein	CHEMBL4297813	PRI-724	FALSE	2	FALSE	KEGG	HIF-1 signaling pathway
ENSG00000146648	EGFR	epidermal growth factor receptor	CHEMBL1201577	CETUXIMAB	TRUE	4	FALSE	KEGG	HIF-1 signaling pathway
ENSG00000146648	EGFR	epidermal growth factor receptor	CHEMBL3353410	OSIMERTINIB	TRUE	4	FALSE	KEGG	HIF-1 signaling pathway
ENSG00000146648	EGFR	epidermal growth factor receptor	CHEMBL1173655	AFATINIB	TRUE	4	FALSE	KEGG	HIF-1 signaling pathway
ENSG00000146648	EGFR	epidermal growth factor receptor	CHEMBL2108359	NIMOTUZUMAB	FALSE	3	FALSE	KEGG	HIF-1 signaling pathway
ENSG00000146648	EGFR	epidermal growth factor receptor	CHEMBL4297774	AMIVANTAMAB	TRUE	4	FALSE	KEGG	HIF-1 signaling pathway
ENSG00000146648	EGFR	epidermal growth factor receptor	CHEMBL2110732	DACOMITINIB	TRUE	4	FALSE	KEGG	HIF-1 signaling pathway
ENSG00000146648	EGFR	epidermal growth factor receptor	CHEMBL2105719	DACOMITINIB	TRUE	4	FALSE	KEGG	HIF-1 signaling pathway
ENSG00000146648	EGFR	epidermal growth factor receptor	CHEMBL554	LAPATINIB	TRUE	4	FALSE	KEGG	HIF-1 signaling pathway
ENSG00000146648	EGFR	epidermal growth factor receptor	CHEMBL1079742	ERLOTINIB HYDROCHLORIDE	TRUE	4	FALSE	KEGG	HIF-1 signaling pathway
ENSG00000146648	EGFR	epidermal growth factor receptor	CHEMBL553	ERLOTINIB	TRUE	4	FALSE	KEGG	HIF-1 signaling pathway
ENSG00000146648	EGFR	epidermal growth factor receptor	CHEMBL939	GEFITINIB	TRUE	4	FALSE	KEGG	HIF-1 signaling pathway
ENSG00000146648	EGFR	epidermal growth factor receptor	CHEMBL2087361	ICOTINIB	FALSE	3	FALSE	KEGG	HIF-1 signaling pathway
ENSG00000146648	EGFR	epidermal growth factor receptor	CHEMBL1201827	PANITUMUMAB	TRUE	4	FALSE	KEGG	HIF-1 signaling pathway
ENSG00000146648	EGFR	epidermal growth factor receptor	CHEMBL1201179	LAPATINIB DITOSYLATE	TRUE	4	FALSE	KEGG	HIF-1 signaling pathway
ENSG00000146648	EGFR	epidermal growth factor receptor	CHEMBL3545311	BRIGATINIB	TRUE	4	FALSE	KEGG	HIF-1 signaling pathway
ENSG00000146648	EGFR	epidermal growth factor receptor	CHEMBL1743047	NECITUMUMAB	TRUE	4	FALSE	KEGG	HIF-1 signaling pathway
ENSG00000146648	EGFR	epidermal growth factor receptor	CHEMBL180022	NERATINIB	TRUE	4	FALSE	KEGG	HIF-1 signaling pathway
ENSG00000141736	ERBB2	erb-b2 receptor tyrosine kinase 2	CHEMBL2007641	PERTUZUMAB	TRUE	4	FALSE	KEGG	HIF-1 signaling pathway
ENSG00000141736	ERBB2	erb-b2 receptor tyrosine kinase 2	CHEMBL3544956	PYROTINIB	FALSE	3	FALSE	KEGG	HIF-1 signaling pathway
ENSG00000141736	ERBB2	erb-b2 receptor tyrosine kinase 2	CHEMBL554	LAPATINIB	TRUE	4	FALSE	KEGG	HIF-1 signaling pathway
ENSG00000141736	ERBB2	erb-b2 receptor tyrosine kinase 2	CHEMBL3989868	TUCATINIB	TRUE	4	FALSE	KEGG	HIF-1 signaling pathway
ENSG00000141736	ERBB2	erb-b2 receptor tyrosine kinase 2	CHEMBL1173655	AFATINIB	TRUE	4	FALSE	KEGG	HIF-1 signaling pathway
ENSG00000141736	ERBB2	erb-b2 receptor tyrosine kinase 2	CHEMBL1201585	TRASTUZUMAB	TRUE	4	FALSE	KEGG	HIF-1 signaling pathway
ENSG00000141736	ERBB2	erb-b2 receptor tyrosine kinase 2	CHEMBL4297844	TRASTUZUMAB DERUXTECAN	TRUE	4	FALSE	KEGG	HIF-1 signaling pathway
ENSG00000141736	ERBB2	erb-b2 receptor tyrosine kinase 2	CHEMBL1743082	TRASTUZUMAB EMTANSINE	TRUE	4	FALSE	KEGG	HIF-1 signaling pathway
ENSG00000141736	ERBB2	erb-b2 receptor tyrosine kinase 2	CHEMBL1201179	LAPATINIB DITOSYLATE	TRUE	4	FALSE	KEGG	HIF-1 signaling pathway
ENSG00000141736	ERBB2	erb-b2 receptor tyrosine kinase 2	CHEMBL24828	VANDETANIB	TRUE	4	FALSE	KEGG	HIF-1 signaling pathway
ENSG00000141736	ERBB2	erb-b2 receptor tyrosine kinase 2	CHEMBL3989921	NERATINIB MALEATE	TRUE	4	FALSE	KEGG	HIF-1 signaling pathway
ENSG00000141736	ERBB2	erb-b2 receptor tyrosine kinase 2	CHEMBL180022	NERATINIB	TRUE	4	FALSE	KEGG	HIF-1 signaling pathway
ENSG00000141736	ERBB2	erb-b2 receptor tyrosine kinase 2	CHEMBL2105719	DACOMITINIB	TRUE	4	FALSE	KEGG	HIF-1 signaling pathway
ENSG00000141736	ERBB2	erb-b2 receptor tyrosine kinase 2	CHEMBL2110732	DACOMITINIB	TRUE	4	FALSE	KEGG	HIF-1 signaling pathway
ENSG00000142208	AKT1	AKT serine/threonine kinase 1	CHEMBL2177390	IPATASERTIB	FALSE	3	FALSE	KEGG	HIF-1 signaling pathway
ENSG00000142208	AKT1	AKT serine/threonine kinase 1	CHEMBL2325741	CAPIVASERTIB	FALSE	3	FALSE	KEGG	HIF-1 signaling pathway
ENSG00000142208	AKT1	AKT serine/threonine kinase 1	CHEMBL3137336	UPROSERTIB	FALSE	2	FALSE	KEGG	HIF-1 signaling pathway
ENSG00000142208	AKT1	AKT serine/threonine kinase 1	CHEMBL1079175	MK-2206	FALSE	2	FALSE	KEGG	HIF-1 signaling pathway
ENSG00000105221	AKT2	AKT serine/threonine kinase 2	CHEMBL2325741	CAPIVASERTIB	FALSE	3	FALSE	KEGG	HIF-1 signaling pathway
ENSG00000105221	AKT2	AKT serine/threonine kinase 2	CHEMBL2177390	IPATASERTIB	FALSE	3	FALSE	KEGG	HIF-1 signaling pathway
ENSG00000105221	AKT2	AKT serine/threonine kinase 2	CHEMBL1079175	MK-2206	FALSE	2	FALSE	KEGG	HIF-1 signaling pathway
ENSG00000105221	AKT2	AKT serine/threonine kinase 2	CHEMBL3137336	UPROSERTIB	FALSE	2	FALSE	KEGG	HIF-1 signaling pathway
ENSG00000102755	FLT1	fms related receptor tyrosine kinase 1	CHEMBL1567	SUNITINIB MALATE	TRUE	4	FALSE	KEGG	HIF-1 signaling pathway
ENSG00000102755	FLT1	fms related receptor tyrosine kinase 1	CHEMBL1200485	SORAFENIB TOSYLATE	TRUE	4	FALSE	KEGG	HIF-1 signaling pathway
ENSG00000102755	FLT1	fms related receptor tyrosine kinase 1	CHEMBL2105704	LENVATINIB MESYLATE	TRUE	4	FALSE	KEGG	HIF-1 signaling pathway
ENSG00000102755	FLT1	fms related receptor tyrosine kinase 1	CHEMBL1336	SORAFENIB	TRUE	4	FALSE	KEGG	HIF-1 signaling pathway
ENSG00000102755	FLT1	fms related receptor tyrosine kinase 1	CHEMBL1289494	TIVOZANIB	TRUE	4	FALSE	KEGG	HIF-1 signaling pathway
ENSG00000102755	FLT1	fms related receptor tyrosine kinase 1	CHEMBL535	SUNITINIB	TRUE	4	FALSE	KEGG	HIF-1 signaling pathway
ENSG00000102755	FLT1	fms related receptor tyrosine kinase 1	CHEMBL477772	PAZOPANIB	TRUE	4	FALSE	KEGG	HIF-1 signaling pathway
ENSG00000102755	FLT1	fms related receptor tyrosine kinase 1	CHEMBL1289601	LENVATINIB	TRUE	4	FALSE	KEGG	HIF-1 signaling pathway
ENSG00000102755	FLT1	fms related receptor tyrosine kinase 1	CHEMBL502835	NINTEDANIB	TRUE	4	FALSE	KEGG	HIF-1 signaling pathway
ENSG00000198793	MTOR	mechanistic target of rapamycin kinase	CHEMBL75880	PERHEXILINE	TRUE	4	TRUE	KEGG	HIF-1 signaling pathway
ENSG00000198793	MTOR	mechanistic target of rapamycin kinase	CHEMBL2103839	RIDAFOROLIMUS	FALSE	3	FALSE	KEGG	HIF-1 signaling pathway
ENSG00000198793	MTOR	mechanistic target of rapamycin kinase	CHEMBL1879463	DACTOLISIB	FALSE	3	FALSE	KEGG	HIF-1 signaling pathway
ENSG00000198793	MTOR	mechanistic target of rapamycin kinase	CHEMBL592445	GEDATOLISIB	FALSE	2	FALSE	KEGG	HIF-1 signaling pathway
ENSG00000198793	MTOR	mechanistic target of rapamycin kinase	CHEMBL2336325	VISTUSERTIB	FALSE	2	FALSE	KEGG	HIF-1 signaling pathway
ENSG00000198793	MTOR	mechanistic target of rapamycin kinase	CHEMBL2326966	SF-1126	FALSE	2	FALSE	KEGG	HIF-1 signaling pathway
ENSG00000198793	MTOR	mechanistic target of rapamycin kinase	CHEMBL3545366	VOXTALISIB	FALSE	2	FALSE	KEGG	HIF-1 signaling pathway
ENSG00000198793	MTOR	mechanistic target of rapamycin kinase	CHEMBL1922094	APITOLISIB	FALSE	2	FALSE	KEGG	HIF-1 signaling pathway
ENSG00000198793	MTOR	mechanistic target of rapamycin kinase	CHEMBL3545097	SAPANISERTIB	FALSE	2	FALSE	KEGG	HIF-1 signaling pathway
ENSG00000154188	ANGPT1	angiopoietin 1	CHEMBL2108568	TREBANANIB	FALSE	3	FALSE	KEGG	HIF-1 signaling pathway
ENSG00000154188	ANGPT1	angiopoietin 1	CHEMBL2109586	AMG-780	FALSE	1	FALSE	KEGG	HIF-1 signaling pathway
ENSG00000091879	ANGPT2	angiopoietin 2	CHEMBL4297750	FARICIMAB	FALSE	3	FALSE	KEGG	HIF-1 signaling pathway
ENSG00000091879	ANGPT2	angiopoietin 2	CHEMBL2108568	TREBANANIB	FALSE	3	FALSE	KEGG	HIF-1 signaling pathway
ENSG00000091879	ANGPT2	angiopoietin 2	CHEMBL2108678	NESVACUMAB	FALSE	2	FALSE	KEGG	HIF-1 signaling pathway
ENSG00000091879	ANGPT2	angiopoietin 2	CHEMBL4594470	CVX-060	FALSE	2	FALSE	KEGG	HIF-1 signaling pathway
ENSG00000099875	MKNK2	MAPK interacting serine/threonine kinase 2	CHEMBL4073443	TOMIVOSERTIB	FALSE	2	FALSE	KEGG	HIF-1 signaling pathway
ENSG00000111537	IFNG	interferon gamma	CHEMBL3989977	EMAPALUMAB	TRUE	4	FALSE	KEGG	HIF-1 signaling pathway
ENSG00000111537	IFNG	interferon gamma	CHEMBL2108459	FONTOLIZUMAB	FALSE	2	FALSE	KEGG	HIF-1 signaling pathway
ENSG00000111537	IFNG	interferon gamma	CHEMBL2109450	AMG-811	FALSE	1	FALSE	KEGG	HIF-1 signaling pathway
ENSG00000027697	IFNGR1	interferon gamma receptor 1	CHEMBL1201564	INTERFERON GAMMA-1B	TRUE	4	FALSE	KEGG	HIF-1 signaling pathway
ENSG00000017427	IGF1	insulin like growth factor 1	CHEMBL4297850	XENTUZUMAB	FALSE	2	FALSE	KEGG	HIF-1 signaling pathway
ENSG00000017427	IGF1	insulin like growth factor 1	CHEMBL2109355	DUSIGITUMAB	FALSE	2	FALSE	KEGG	HIF-1 signaling pathway
ENSG00000140443	IGF1R	insulin like growth factor 1 receptor	CHEMBL1743079	TEPROTUMUMAB	TRUE	4	FALSE	KEGG	HIF-1 signaling pathway
ENSG00000140443	IGF1R	insulin like growth factor 1 receptor	CHEMBL1201716	MECASERMIN	TRUE	4	FALSE	KEGG	HIF-1 signaling pathway
ENSG00000140443	IGF1R	insulin like growth factor 1 receptor	CHEMBL1091644	LINSITINIB	FALSE	3	FALSE	KEGG	HIF-1 signaling pathway
ENSG00000140443	IGF1R	insulin like growth factor 1 receptor	CHEMBL1743019	FIGITUMUMAB	FALSE	3	FALSE	KEGG	HIF-1 signaling pathway
ENSG00000140443	IGF1R	insulin like growth factor 1 receptor	CHEMBL1743001	CIXUTUMUMAB	FALSE	2	FALSE	KEGG	HIF-1 signaling pathway
ENSG00000140443	IGF1R	insulin like growth factor 1 receptor	CHEMBL2109357	AVE-1642	FALSE	2	FALSE	KEGG	HIF-1 signaling pathway
ENSG00000140443	IGF1R	insulin like growth factor 1 receptor	CHEMBL1743024	GANITUMAB	FALSE	3	FALSE	KEGG	HIF-1 signaling pathway
ENSG00000140443	IGF1R	insulin like growth factor 1 receptor	CHEMBL1743006	DALOTUZUMAB	FALSE	2	FALSE	KEGG	HIF-1 signaling pathway
ENSG00000136244	IL6	interleukin 6	CHEMBL1743070	SILTUXIMAB	TRUE	4	FALSE	KEGG	HIF-1 signaling pathway
ENSG00000136244	IL6	interleukin 6	CHEMBL1743071	SIRUKUMAB	FALSE	3	FALSE	KEGG	HIF-1 signaling pathway
ENSG00000136244	IL6	interleukin 6	CHEMBL1743050	OLOKIZUMAB	FALSE	3	FALSE	KEGG	HIF-1 signaling pathway
ENSG00000136244	IL6	interleukin 6	CHEMBL2108589	CLAZAKIZUMAB	FALSE	3	FALSE	KEGG	HIF-1 signaling pathway
ENSG00000160712	IL6R	interleukin 6 receptor	CHEMBL2108730	SARILUMAB	TRUE	4	FALSE	KEGG	HIF-1 signaling pathway
ENSG00000160712	IL6R	interleukin 6 receptor	CHEMBL1237022	TOCILIZUMAB	TRUE	4	FALSE	KEGG	HIF-1 signaling pathway
ENSG00000160712	IL6R	interleukin 6 receptor	CHEMBL3833307	SATRALIZUMAB	TRUE	4	FALSE	KEGG	HIF-1 signaling pathway
ENSG00000171105	INSR	insulin receptor	CHEMBL1201630	INSULIN PURIFIED PORK	TRUE	4	FALSE	KEGG	HIF-1 signaling pathway
ENSG00000171105	INSR	insulin receptor	CHEMBL1201631	INSULIN	TRUE	4	FALSE	KEGG	HIF-1 signaling pathway
ENSG00000171105	INSR	insulin receptor	CHEMBL1201613	INSULIN GLULISINE	TRUE	4	FALSE	KEGG	HIF-1 signaling pathway
ENSG00000171105	INSR	insulin receptor	CHEMBL1201538	INSULIN LISPRO	TRUE	4	FALSE	KEGG	HIF-1 signaling pathway
ENSG00000171105	INSR	insulin receptor	CHEMBL1201496	INSULIN ASPART	TRUE	4	FALSE	KEGG	HIF-1 signaling pathway
ENSG00000171105	INSR	insulin receptor	CHEMBL1201545	INSULIN SUSP ISOPHANE BEEF	TRUE	4	FALSE	KEGG	HIF-1 signaling pathway
ENSG00000171105	INSR	insulin receptor	CHEMBL2104391	INSULIN DETEMIR	TRUE	4	FALSE	KEGG	HIF-1 signaling pathway
ENSG00000171105	INSR	insulin receptor	CHEMBL1201539	INSULIN PORK	TRUE	4	FALSE	KEGG	HIF-1 signaling pathway
ENSG00000171105	INSR	insulin receptor	CHEMBL1201497	INSULIN GLARGINE	TRUE	4	FALSE	KEGG	HIF-1 signaling pathway
ENSG00000171105	INSR	insulin receptor	CHEMBL1201627	INSULIN SUSP ISOPHANE SEMISYNTHETIC PURIFIED HUMAN	TRUE	4	FALSE	KEGG	HIF-1 signaling pathway
ENSG00000111321	LTBR	lymphotoxin beta receptor	CHEMBL2109509	HCBE-11	FALSE	1	FALSE	KEGG	HIF-1 signaling pathway
ENSG00000109320	NFKB1	nuclear factor kappa B subunit 1	CHEMBL3786673	EDASALONEXENT	FALSE	3	FALSE	KEGG	HIF-1 signaling pathway
ENSG00000007171	NOS2	nitric oxide synthase 2	CHEMBL256147	TILARGININE	FALSE	3	FALSE	KEGG	HIF-1 signaling pathway
ENSG00000007171	NOS2	nitric oxide synthase 2	CHEMBL1256175	TILARGININE ACETATE	FALSE	3	FALSE	KEGG	HIF-1 signaling pathway
ENSG00000007171	NOS2	nitric oxide synthase 2	CHEMBL114551	GW-274150	FALSE	2	FALSE	KEGG	HIF-1 signaling pathway
ENSG00000164867	NOS3	nitric oxide synthase 3	CHEMBL256147	TILARGININE	FALSE	3	FALSE	KEGG	HIF-1 signaling pathway
ENSG00000164867	NOS3	nitric oxide synthase 3	CHEMBL1256175	TILARGININE ACETATE	FALSE	3	FALSE	KEGG	HIF-1 signaling pathway
ENSG00000106366	SERPINE1	serpin family E member 1	CHEMBL325424	ALEPLASININ	FALSE	1	FALSE	KEGG	HIF-1 signaling pathway
ENSG00000152256	PDK1	pyruvate dehydrogenase kinase 1	CHEMBL306823	SODIUM DICHLOROACETATE	TRUE	4	FALSE	KEGG	HIF-1 signaling pathway
ENSG00000121879	PIK3CA	phosphatidylinositol-4,5-bisphosphate 3-kinase catalytic subunit alpha	CHEMBL2396661	ALPELISIB	TRUE	4	FALSE	KEGG	HIF-1 signaling pathway
ENSG00000121879	PIK3CA	phosphatidylinositol-4,5-bisphosphate 3-kinase catalytic subunit alpha	CHEMBL3545068	COPANLISIB HYDROCHLORIDE	TRUE	4	FALSE	KEGG	HIF-1 signaling pathway
ENSG00000121879	PIK3CA	phosphatidylinositol-4,5-bisphosphate 3-kinase catalytic subunit alpha	CHEMBL3218576	COPANLISIB	TRUE	4	FALSE	KEGG	HIF-1 signaling pathway
ENSG00000121879	PIK3CA	phosphatidylinositol-4,5-bisphosphate 3-kinase catalytic subunit alpha	CHEMBL1879463	DACTOLISIB	FALSE	3	FALSE	KEGG	HIF-1 signaling pathway
ENSG00000121879	PIK3CA	phosphatidylinositol-4,5-bisphosphate 3-kinase catalytic subunit alpha	CHEMBL2017974	BUPARLISIB	FALSE	3	FALSE	KEGG	HIF-1 signaling pathway
ENSG00000121879	PIK3CA	phosphatidylinositol-4,5-bisphosphate 3-kinase catalytic subunit alpha	CHEMBL2387080	TASELISIB	FALSE	3	FALSE	KEGG	HIF-1 signaling pathway
ENSG00000121879	PIK3CA	phosphatidylinositol-4,5-bisphosphate 3-kinase catalytic subunit alpha	CHEMBL592445	GEDATOLISIB	FALSE	2	FALSE	KEGG	HIF-1 signaling pathway
ENSG00000121879	PIK3CA	phosphatidylinositol-4,5-bisphosphate 3-kinase catalytic subunit alpha	CHEMBL3813842	PAXALISIB	FALSE	2	FALSE	KEGG	HIF-1 signaling pathway
ENSG00000121879	PIK3CA	phosphatidylinositol-4,5-bisphosphate 3-kinase catalytic subunit alpha	CHEMBL3935857	SERABELISIB	FALSE	2	FALSE	KEGG	HIF-1 signaling pathway
ENSG00000051382	PIK3CB	phosphatidylinositol-4,5-bisphosphate 3-kinase catalytic subunit beta	CHEMBL592445	GEDATOLISIB	FALSE	2	FALSE	KEGG	HIF-1 signaling pathway
ENSG00000051382	PIK3CB	phosphatidylinositol-4,5-bisphosphate 3-kinase catalytic subunit beta	CHEMBL1879463	DACTOLISIB	FALSE	3	FALSE	KEGG	HIF-1 signaling pathway
ENSG00000051382	PIK3CB	phosphatidylinositol-4,5-bisphosphate 3-kinase catalytic subunit beta	CHEMBL2017974	BUPARLISIB	FALSE	3	FALSE	KEGG	HIF-1 signaling pathway
ENSG00000051382	PIK3CB	phosphatidylinositol-4,5-bisphosphate 3-kinase catalytic subunit beta	CHEMBL2387080	TASELISIB	FALSE	3	FALSE	KEGG	HIF-1 signaling pathway
ENSG00000051382	PIK3CB	phosphatidylinositol-4,5-bisphosphate 3-kinase catalytic subunit beta	CHEMBL1234354	PF-04691502	FALSE	2	FALSE	KEGG	HIF-1 signaling pathway
ENSG00000051382	PIK3CB	phosphatidylinositol-4,5-bisphosphate 3-kinase catalytic subunit beta	CHEMBL4297181	SAMOTOLISIB	FALSE	2	FALSE	KEGG	HIF-1 signaling pathway
ENSG00000051382	PIK3CB	phosphatidylinositol-4,5-bisphosphate 3-kinase catalytic subunit beta	CHEMBL3813842	PAXALISIB	FALSE	2	FALSE	KEGG	HIF-1 signaling pathway
ENSG00000171608	PIK3CD	phosphatidylinositol-4,5-bisphosphate 3-kinase catalytic subunit delta	CHEMBL2216870	IDELALISIB	TRUE	4	FALSE	KEGG	HIF-1 signaling pathway
ENSG00000171608	PIK3CD	phosphatidylinositol-4,5-bisphosphate 3-kinase catalytic subunit delta	CHEMBL3989869	UMBRALISIB TOSYLATE	TRUE	4	FALSE	KEGG	HIF-1 signaling pathway
ENSG00000171608	PIK3CD	phosphatidylinositol-4,5-bisphosphate 3-kinase catalytic subunit delta	CHEMBL3039502	DUVELISIB	TRUE	4	FALSE	KEGG	HIF-1 signaling pathway
ENSG00000171608	PIK3CD	phosphatidylinositol-4,5-bisphosphate 3-kinase catalytic subunit delta	CHEMBL3545068	COPANLISIB HYDROCHLORIDE	TRUE	4	FALSE	KEGG	HIF-1 signaling pathway
ENSG00000171608	PIK3CD	phosphatidylinositol-4,5-bisphosphate 3-kinase catalytic subunit delta	CHEMBL3218576	COPANLISIB	TRUE	4	FALSE	KEGG	HIF-1 signaling pathway
ENSG00000171608	PIK3CD	phosphatidylinositol-4,5-bisphosphate 3-kinase catalytic subunit delta	CHEMBL3948730	UMBRALISIB	TRUE	4	FALSE	KEGG	HIF-1 signaling pathway
ENSG00000171608	PIK3CD	phosphatidylinositol-4,5-bisphosphate 3-kinase catalytic subunit delta	CHEMBL4297615	PARSACLISIB	FALSE	3	FALSE	KEGG	HIF-1 signaling pathway
ENSG00000171608	PIK3CD	phosphatidylinositol-4,5-bisphosphate 3-kinase catalytic subunit delta	CHEMBL1879463	DACTOLISIB	FALSE	3	FALSE	KEGG	HIF-1 signaling pathway
ENSG00000145675	PIK3R1	phosphoinositide-3-kinase regulatory subunit 1	CHEMBL592445	GEDATOLISIB	FALSE	2	FALSE	KEGG	HIF-1 signaling pathway
ENSG00000145675	PIK3R1	phosphoinositide-3-kinase regulatory subunit 1	CHEMBL2017974	BUPARLISIB	FALSE	3	FALSE	KEGG	HIF-1 signaling pathway
ENSG00000145675	PIK3R1	phosphoinositide-3-kinase regulatory subunit 1	CHEMBL1879463	DACTOLISIB	FALSE	3	FALSE	KEGG	HIF-1 signaling pathway
ENSG00000145675	PIK3R1	phosphoinositide-3-kinase regulatory subunit 1	CHEMBL2387080	TASELISIB	FALSE	3	FALSE	KEGG	HIF-1 signaling pathway
ENSG00000145675	PIK3R1	phosphoinositide-3-kinase regulatory subunit 1	CHEMBL521851	PICTILISIB	FALSE	2	FALSE	KEGG	HIF-1 signaling pathway
ENSG00000145675	PIK3R1	phosphoinositide-3-kinase regulatory subunit 1	CHEMBL3813842	PAXALISIB	FALSE	2	FALSE	KEGG	HIF-1 signaling pathway
ENSG00000145675	PIK3R1	phosphoinositide-3-kinase regulatory subunit 1	CHEMBL2326966	SF-1126	FALSE	2	FALSE	KEGG	HIF-1 signaling pathway
ENSG00000145675	PIK3R1	phosphoinositide-3-kinase regulatory subunit 1	CHEMBL4297181	SAMOTOLISIB	FALSE	2	FALSE	KEGG	HIF-1 signaling pathway
ENSG00000145675	PIK3R1	phosphoinositide-3-kinase regulatory subunit 1	CHEMBL1234354	PF-04691502	FALSE	2	FALSE	KEGG	HIF-1 signaling pathway
ENSG00000145675	PIK3R1	phosphoinositide-3-kinase regulatory subunit 1	CHEMBL3545366	VOXTALISIB	FALSE	2	FALSE	KEGG	HIF-1 signaling pathway
ENSG00000145675	PIK3R1	phosphoinositide-3-kinase regulatory subunit 1	CHEMBL1922094	APITOLISIB	FALSE	2	FALSE	KEGG	HIF-1 signaling pathway
ENSG00000105647	PIK3R2	phosphoinositide-3-kinase regulatory subunit 2	CHEMBL592445	GEDATOLISIB	FALSE	2	FALSE	KEGG	HIF-1 signaling pathway
ENSG00000105647	PIK3R2	phosphoinositide-3-kinase regulatory subunit 2	CHEMBL2017974	BUPARLISIB	FALSE	3	FALSE	KEGG	HIF-1 signaling pathway
ENSG00000105647	PIK3R2	phosphoinositide-3-kinase regulatory subunit 2	CHEMBL1879463	DACTOLISIB	FALSE	3	FALSE	KEGG	HIF-1 signaling pathway
ENSG00000105647	PIK3R2	phosphoinositide-3-kinase regulatory subunit 2	CHEMBL2387080	TASELISIB	FALSE	3	FALSE	KEGG	HIF-1 signaling pathway
ENSG00000105647	PIK3R2	phosphoinositide-3-kinase regulatory subunit 2	CHEMBL3545366	VOXTALISIB	FALSE	2	FALSE	KEGG	HIF-1 signaling pathway
ENSG00000105647	PIK3R2	phosphoinositide-3-kinase regulatory subunit 2	CHEMBL1234354	PF-04691502	FALSE	2	FALSE	KEGG	HIF-1 signaling pathway
ENSG00000105647	PIK3R2	phosphoinositide-3-kinase regulatory subunit 2	CHEMBL411907	SONOLISIB	FALSE	2	FALSE	KEGG	HIF-1 signaling pathway
ENSG00000105647	PIK3R2	phosphoinositide-3-kinase regulatory subunit 2	CHEMBL1922094	APITOLISIB	FALSE	2	FALSE	KEGG	HIF-1 signaling pathway
ENSG00000105647	PIK3R2	phosphoinositide-3-kinase regulatory subunit 2	CHEMBL3813842	PAXALISIB	FALSE	2	FALSE	KEGG	HIF-1 signaling pathway
ENSG00000105647	PIK3R2	phosphoinositide-3-kinase regulatory subunit 2	CHEMBL4297181	SAMOTOLISIB	FALSE	2	FALSE	KEGG	HIF-1 signaling pathway
ENSG00000105647	PIK3R2	phosphoinositide-3-kinase regulatory subunit 2	CHEMBL521851	PICTILISIB	FALSE	2	FALSE	KEGG	HIF-1 signaling pathway
ENSG00000135766	EGLN1	egl-9 family hypoxia inducible factor 1	CHEMBL2338329	ROXADUSTAT	FALSE	3	FALSE	KEGG	HIF-1 signaling pathway
ENSG00000135766	EGLN1	egl-9 family hypoxia inducible factor 1	CHEMBL3646221	VADADUSTAT	FALSE	3	FALSE	KEGG	HIF-1 signaling pathway
ENSG00000135766	EGLN1	egl-9 family hypoxia inducible factor 1	CHEMBL3544988	DAPRODUSTAT	FALSE	3	FALSE	KEGG	HIF-1 signaling pathway
ENSG00000135766	EGLN1	egl-9 family hypoxia inducible factor 1	CHEMBL4297619	ENARODUSTAT	FALSE	3	FALSE	KEGG	HIF-1 signaling pathway
ENSG00000154229	PRKCA	protein kinase C alpha	CHEMBL608533	MIDOSTAURIN	TRUE	4	FALSE	KEGG	HIF-1 signaling pathway
ENSG00000154229	PRKCA	protein kinase C alpha	CHEMBL2108287	APRINOCARSEN	FALSE	3	FALSE	KEGG	HIF-1 signaling pathway
ENSG00000154229	PRKCA	protein kinase C alpha	CHEMBL565612	SOTRASTAURIN	FALSE	2	FALSE	KEGG	HIF-1 signaling pathway
ENSG00000154229	PRKCA	protein kinase C alpha	CHEMBL574737	UCN-01	FALSE	2	FALSE	KEGG	HIF-1 signaling pathway
ENSG00000166501	PRKCB	protein kinase C beta	CHEMBL608533	MIDOSTAURIN	TRUE	4	FALSE	KEGG	HIF-1 signaling pathway
ENSG00000166501	PRKCB	protein kinase C beta	CHEMBL300138	ENZASTAURIN	FALSE	3	FALSE	KEGG	HIF-1 signaling pathway
ENSG00000166501	PRKCB	protein kinase C beta	CHEMBL91829	RUBOXISTAURIN	FALSE	3	FALSE	KEGG	HIF-1 signaling pathway
ENSG00000166501	PRKCB	protein kinase C beta	CHEMBL565612	SOTRASTAURIN	FALSE	2	FALSE	KEGG	HIF-1 signaling pathway
ENSG00000126583	PRKCG	protein kinase C gamma	CHEMBL608533	MIDOSTAURIN	TRUE	4	FALSE	KEGG	HIF-1 signaling pathway
ENSG00000126583	PRKCG	protein kinase C gamma	CHEMBL574737	UCN-01	FALSE	2	FALSE	KEGG	HIF-1 signaling pathway
ENSG00000126583	PRKCG	protein kinase C gamma	CHEMBL565612	SOTRASTAURIN	FALSE	2	FALSE	KEGG	HIF-1 signaling pathway
ENSG00000100030	MAPK1	mitogen-activated protein kinase 1	CHEMBL3590106	ULIXERTINIB	FALSE	2	FALSE	KEGG	HIF-1 signaling pathway
ENSG00000100030	MAPK1	mitogen-activated protein kinase 1	CHEMBL4650285	TEMUTERKIB	FALSE	2	FALSE	KEGG	HIF-1 signaling pathway
ENSG00000100030	MAPK1	mitogen-activated protein kinase 1	CHEMBL3544964	RAVOXERTINIB	FALSE	1	FALSE	KEGG	HIF-1 signaling pathway
ENSG00000100030	MAPK1	mitogen-activated protein kinase 1	CHEMBL3545001	MK-8353	FALSE	1	FALSE	KEGG	HIF-1 signaling pathway
ENSG00000100030	MAPK1	mitogen-activated protein kinase 1	CHEMBL4650284	KO-947	FALSE	1	FALSE	KEGG	HIF-1 signaling pathway
ENSG00000102882	MAPK3	mitogen-activated protein kinase 3	CHEMBL3590106	ULIXERTINIB	FALSE	2	FALSE	KEGG	HIF-1 signaling pathway
ENSG00000102882	MAPK3	mitogen-activated protein kinase 3	CHEMBL4650285	TEMUTERKIB	FALSE	2	FALSE	KEGG	HIF-1 signaling pathway
ENSG00000102882	MAPK3	mitogen-activated protein kinase 3	CHEMBL3545001	MK-8353	FALSE	1	FALSE	KEGG	HIF-1 signaling pathway
ENSG00000102882	MAPK3	mitogen-activated protein kinase 3	CHEMBL4650284	KO-947	FALSE	1	FALSE	KEGG	HIF-1 signaling pathway
ENSG00000102882	MAPK3	mitogen-activated protein kinase 3	CHEMBL3544964	RAVOXERTINIB	FALSE	1	FALSE	KEGG	HIF-1 signaling pathway
ENSG00000169032	MAP2K1	mitogen-activated protein kinase kinase 1	CHEMBL3187723	BINIMETINIB	TRUE	4	FALSE	KEGG	HIF-1 signaling pathway
ENSG00000169032	MAP2K1	mitogen-activated protein kinase kinase 1	CHEMBL2364607	COBIMETINIB FUMARATE	TRUE	4	FALSE	KEGG	HIF-1 signaling pathway
ENSG00000169032	MAP2K1	mitogen-activated protein kinase kinase 1	CHEMBL2105741	TRAMETINIB DIMETHYL SULFOXIDE	TRUE	4	FALSE	KEGG	HIF-1 signaling pathway
ENSG00000169032	MAP2K1	mitogen-activated protein kinase kinase 1	CHEMBL1614701	SELUMETINIB	TRUE	4	FALSE	KEGG	HIF-1 signaling pathway
ENSG00000169032	MAP2K1	mitogen-activated protein kinase kinase 1	CHEMBL2146883	COBIMETINIB	TRUE	4	FALSE	KEGG	HIF-1 signaling pathway
ENSG00000169032	MAP2K1	mitogen-activated protein kinase kinase 1	CHEMBL2105684	SELUMETINIB SULFATE	TRUE	4	FALSE	KEGG	HIF-1 signaling pathway
ENSG00000169032	MAP2K1	mitogen-activated protein kinase kinase 1	CHEMBL2103875	TRAMETINIB	TRUE	4	FALSE	KEGG	HIF-1 signaling pathway
ENSG00000126934	MAP2K2	mitogen-activated protein kinase kinase 2	CHEMBL2105684	SELUMETINIB SULFATE	TRUE	4	FALSE	KEGG	HIF-1 signaling pathway
ENSG00000126934	MAP2K2	mitogen-activated protein kinase kinase 2	CHEMBL2105741	TRAMETINIB DIMETHYL SULFOXIDE	TRUE	4	FALSE	KEGG	HIF-1 signaling pathway
ENSG00000126934	MAP2K2	mitogen-activated protein kinase kinase 2	CHEMBL3187723	BINIMETINIB	TRUE	4	FALSE	KEGG	HIF-1 signaling pathway
ENSG00000126934	MAP2K2	mitogen-activated protein kinase kinase 2	CHEMBL1614701	SELUMETINIB	TRUE	4	FALSE	KEGG	HIF-1 signaling pathway
ENSG00000126934	MAP2K2	mitogen-activated protein kinase kinase 2	CHEMBL2146883	COBIMETINIB	TRUE	4	FALSE	KEGG	HIF-1 signaling pathway
ENSG00000126934	MAP2K2	mitogen-activated protein kinase kinase 2	CHEMBL2103875	TRAMETINIB	TRUE	4	FALSE	KEGG	HIF-1 signaling pathway
ENSG00000126934	MAP2K2	mitogen-activated protein kinase kinase 2	CHEMBL2364607	COBIMETINIB FUMARATE	TRUE	4	FALSE	KEGG	HIF-1 signaling pathway
ENSG00000171791	BCL2	BCL2 apoptosis regulator	CHEMBL3137309	VENETOCLAX	TRUE	4	FALSE	KEGG	HIF-1 signaling pathway
ENSG00000171791	BCL2	BCL2 apoptosis regulator	CHEMBL2107358	OBATOCLAX MESYLATE	FALSE	3	FALSE	KEGG	HIF-1 signaling pathway
ENSG00000171791	BCL2	BCL2 apoptosis regulator	CHEMBL2109229	OBLIMERSEN SODIUM	FALSE	3	FALSE	KEGG	HIF-1 signaling pathway
ENSG00000171791	BCL2	BCL2 apoptosis regulator	CHEMBL443684	NAVITOCLAX	FALSE	3	FALSE	KEGG	HIF-1 signaling pathway
ENSG00000171791	BCL2	BCL2 apoptosis regulator	CHEMBL408194	OBATOCLAX	FALSE	3	FALSE	KEGG	HIF-1 signaling pathway
ENSG00000173039	RELA	RELA proto-oncogene, NF-kB subunit	CHEMBL3786673	EDASALONEXENT	FALSE	3	FALSE	KEGG	HIF-1 signaling pathway
ENSG00000137154	RPS6	ribosomal protein S6	CHEMBL256997	ATALUREN	TRUE	4	FALSE	KEGG	HIF-1 signaling pathway
ENSG00000137154	RPS6	ribosomal protein S6	CHEMBL4297744	ELX-02	FALSE	2	FALSE	KEGG	HIF-1 signaling pathway
ENSG00000137154	RPS6	ribosomal protein S6	CHEMBL4297789	MT-3724	FALSE	2	FALSE	KEGG	HIF-1 signaling pathway
ENSG00000108443	RPS6KB1	ribosomal protein S6 kinase B1	CHEMBL3545076	LY-2584702	FALSE	1	FALSE	KEGG	HIF-1 signaling pathway
ENSG00000108443	RPS6KB1	ribosomal protein S6 kinase B1	CHEMBL4650277	TAS0612	FALSE	1	FALSE	KEGG	HIF-1 signaling pathway
ENSG00000108443	RPS6KB1	ribosomal protein S6 kinase B1	CHEMBL3545134	LY-2780301	FALSE	1	FALSE	KEGG	HIF-1 signaling pathway
ENSG00000108443	RPS6KB1	ribosomal protein S6 kinase B1	CHEMBL3544935	XL-418	FALSE	1	FALSE	KEGG	HIF-1 signaling pathway
ENSG00000108443	RPS6KB1	ribosomal protein S6 kinase B1	CHEMBL3545003	MSC-2363318A	FALSE	1	FALSE	KEGG	HIF-1 signaling pathway
ENSG00000175634	RPS6KB2	ribosomal protein S6 kinase B2	CHEMBL3545134	LY-2780301	FALSE	1	FALSE	KEGG	HIF-1 signaling pathway
ENSG00000175634	RPS6KB2	ribosomal protein S6 kinase B2	CHEMBL4650277	TAS0612	FALSE	1	FALSE	KEGG	HIF-1 signaling pathway
ENSG00000175634	RPS6KB2	ribosomal protein S6 kinase B2	CHEMBL3545003	MSC-2363318A	FALSE	1	FALSE	KEGG	HIF-1 signaling pathway
ENSG00000175634	RPS6KB2	ribosomal protein S6 kinase B2	CHEMBL3544935	XL-418	FALSE	1	FALSE	KEGG	HIF-1 signaling pathway
ENSG00000168610	STAT3	signal transducer and activator of transcription 3	CHEMBL4297739	DANVATIRSEN	FALSE	2	FALSE	KEGG	HIF-1 signaling pathway
ENSG00000120156	TEK	TEK receptor tyrosine kinase	CHEMBL24828	VANDETANIB	TRUE	4	FALSE	KEGG	HIF-1 signaling pathway
ENSG00000120156	TEK	TEK receptor tyrosine kinase	CHEMBL1946170	REGORAFENIB	TRUE	4	FALSE	KEGG	HIF-1 signaling pathway
ENSG00000072274	TFRC	transferrin receptor	CHEMBL4594565	PABINAFUSP ALFA	FALSE	3	FALSE	KEGG	HIF-1 signaling pathway
ENSG00000072274	TFRC	transferrin receptor	CHEMBL2109494	A27.15	FALSE	1	FALSE	KEGG	HIF-1 signaling pathway
ENSG00000072274	TFRC	transferrin receptor	CHEMBL2109495	E2.3	FALSE	1	FALSE	KEGG	HIF-1 signaling pathway
ENSG00000136869	TLR4	toll like receptor 4	CHEMBL501259	ERITORAN	FALSE	3	FALSE	KEGG	HIF-1 signaling pathway
ENSG00000136869	TLR4	toll like receptor 4	CHEMBL3301672	ERITORAN TETRASODIUM	FALSE	3	FALSE	KEGG	HIF-1 signaling pathway
ENSG00000136869	TLR4	toll like receptor 4	CHEMBL225157	RESATORVID	FALSE	3	FALSE	KEGG	HIF-1 signaling pathway
ENSG00000112715	VEGFA	vascular endothelial growth factor A	CHEMBL1201421	PEGAPTANIB SODIUM	TRUE	4	FALSE	KEGG	HIF-1 signaling pathway
ENSG00000112715	VEGFA	vascular endothelial growth factor A	CHEMBL1201825	RANIBIZUMAB	TRUE	4	FALSE	KEGG	HIF-1 signaling pathway
ENSG00000112715	VEGFA	vascular endothelial growth factor A	CHEMBL1201583	BEVACIZUMAB	TRUE	4	FALSE	KEGG	HIF-1 signaling pathway
ENSG00000112715	VEGFA	vascular endothelial growth factor A	CHEMBL1742982	AFLIBERCEPT	TRUE	4	FALSE	KEGG	HIF-1 signaling pathway
ENSG00000112715	VEGFA	vascular endothelial growth factor A	CHEMBL2108313	CONBERCEPT	FALSE	3	FALSE	KEGG	HIF-1 signaling pathway
ENSG00000117461	PIK3R3	phosphoinositide-3-kinase regulatory subunit 3	CHEMBL592445	GEDATOLISIB	FALSE	2	FALSE	KEGG	HIF-1 signaling pathway
ENSG00000117461	PIK3R3	phosphoinositide-3-kinase regulatory subunit 3	CHEMBL2017974	BUPARLISIB	FALSE	3	FALSE	KEGG	HIF-1 signaling pathway
ENSG00000117461	PIK3R3	phosphoinositide-3-kinase regulatory subunit 3	CHEMBL2387080	TASELISIB	FALSE	3	FALSE	KEGG	HIF-1 signaling pathway
ENSG00000117461	PIK3R3	phosphoinositide-3-kinase regulatory subunit 3	CHEMBL1879463	DACTOLISIB	FALSE	3	FALSE	KEGG	HIF-1 signaling pathway
ENSG00000117461	PIK3R3	phosphoinositide-3-kinase regulatory subunit 3	CHEMBL1922094	APITOLISIB	FALSE	2	FALSE	KEGG	HIF-1 signaling pathway
ENSG00000117461	PIK3R3	phosphoinositide-3-kinase regulatory subunit 3	CHEMBL3545366	VOXTALISIB	FALSE	2	FALSE	KEGG	HIF-1 signaling pathway
ENSG00000117461	PIK3R3	phosphoinositide-3-kinase regulatory subunit 3	CHEMBL4297181	SAMOTOLISIB	FALSE	2	FALSE	KEGG	HIF-1 signaling pathway
ENSG00000117461	PIK3R3	phosphoinositide-3-kinase regulatory subunit 3	CHEMBL3813842	PAXALISIB	FALSE	2	FALSE	KEGG	HIF-1 signaling pathway
ENSG00000117461	PIK3R3	phosphoinositide-3-kinase regulatory subunit 3	CHEMBL1234354	PF-04691502	FALSE	2	FALSE	KEGG	HIF-1 signaling pathway
ENSG00000079277	MKNK1	MAPK interacting serine/threonine kinase 1	CHEMBL4073443	TOMIVOSERTIB	FALSE	2	FALSE	KEGG	HIF-1 signaling pathway
ENSG00000100387	RBX1	ring-box 1	CHEMBL468	THALIDOMIDE	TRUE	4	FALSE	KEGG	HIF-1 signaling pathway
ENSG00000100387	RBX1	ring-box 1	CHEMBL848	LENALIDOMIDE	TRUE	4	FALSE	KEGG	HIF-1 signaling pathway
ENSG00000100387	RBX1	ring-box 1	CHEMBL43452	POMALIDOMIDE	TRUE	4	FALSE	KEGG	HIF-1 signaling pathway
ENSG00000175054	ATR	ATR serine/threonine kinase	CHEMBL4285417	CERALASERTIB	FALSE	2	FALSE	KEGG	Fanconi anemia pathway
ENSG00000175054	ATR	ATR serine/threonine kinase	CHEMBL3989870	BERZOSERTIB	FALSE	2	FALSE	KEGG	Fanconi anemia pathway
ENSG00000137818	RPLP1	ribosomal protein lateral stalk subunit P1	CHEMBL256997	ATALUREN	TRUE	4	FALSE	Reactome	Major pathway of rRNA processing in the nucleolus and cytosol
ENSG00000137818	RPLP1	ribosomal protein lateral stalk subunit P1	CHEMBL4297789	MT-3724	FALSE	2	FALSE	Reactome	Major pathway of rRNA processing in the nucleolus and cytosol
ENSG00000137818	RPLP1	ribosomal protein lateral stalk subunit P1	CHEMBL4297744	ELX-02	FALSE	2	FALSE	Reactome	Major pathway of rRNA processing in the nucleolus and cytosol
ENSG00000089157	RPLP0	ribosomal protein lateral stalk subunit P0	CHEMBL256997	ATALUREN	TRUE	4	FALSE	Reactome	Major pathway of rRNA processing in the nucleolus and cytosol
ENSG00000089157	RPLP0	ribosomal protein lateral stalk subunit P0	CHEMBL4297789	MT-3724	FALSE	2	FALSE	Reactome	Major pathway of rRNA processing in the nucleolus and cytosol
ENSG00000089157	RPLP0	ribosomal protein lateral stalk subunit P0	CHEMBL4297744	ELX-02	FALSE	2	FALSE	Reactome	Major pathway of rRNA processing in the nucleolus and cytosol
ENSG00000168028	RPSA	ribosomal protein SA	CHEMBL256997	ATALUREN	TRUE	4	FALSE	Reactome	Major pathway of rRNA processing in the nucleolus and cytosol
ENSG00000168028	RPSA	ribosomal protein SA	CHEMBL4297744	ELX-02	FALSE	2	FALSE	Reactome	Major pathway of rRNA processing in the nucleolus and cytosol
ENSG00000168028	RPSA	ribosomal protein SA	CHEMBL4297789	MT-3724	FALSE	2	FALSE	Reactome	Major pathway of rRNA processing in the nucleolus and cytosol
ENSG00000140988	RPS2	ribosomal protein S2	CHEMBL256997	ATALUREN	TRUE	4	FALSE	Reactome	Major pathway of rRNA processing in the nucleolus and cytosol
ENSG00000140988	RPS2	ribosomal protein S2	CHEMBL4297744	ELX-02	FALSE	2	FALSE	Reactome	Major pathway of rRNA processing in the nucleolus and cytosol
ENSG00000140988	RPS2	ribosomal protein S2	CHEMBL4297789	MT-3724	FALSE	2	FALSE	Reactome	Major pathway of rRNA processing in the nucleolus and cytosol
ENSG00000182899	RPL35A	ribosomal protein L35a	CHEMBL256997	ATALUREN	TRUE	4	FALSE	Reactome	Major pathway of rRNA processing in the nucleolus and cytosol
ENSG00000182899	RPL35A	ribosomal protein L35a	CHEMBL4297789	MT-3724	FALSE	2	FALSE	Reactome	Major pathway of rRNA processing in the nucleolus and cytosol
ENSG00000182899	RPL35A	ribosomal protein L35a	CHEMBL4297744	ELX-02	FALSE	2	FALSE	Reactome	Major pathway of rRNA processing in the nucleolus and cytosol
ENSG00000147604	RPL7	ribosomal protein L7	CHEMBL256997	ATALUREN	TRUE	4	FALSE	Reactome	Major pathway of rRNA processing in the nucleolus and cytosol
ENSG00000147604	RPL7	ribosomal protein L7	CHEMBL4297744	ELX-02	FALSE	2	FALSE	Reactome	Major pathway of rRNA processing in the nucleolus and cytosol
ENSG00000147604	RPL7	ribosomal protein L7	CHEMBL4297789	MT-3724	FALSE	2	FALSE	Reactome	Major pathway of rRNA processing in the nucleolus and cytosol
ENSG00000265681	RPL17	ribosomal protein L17	CHEMBL256997	ATALUREN	TRUE	4	FALSE	Reactome	Major pathway of rRNA processing in the nucleolus and cytosol
ENSG00000265681	RPL17	ribosomal protein L17	CHEMBL4297744	ELX-02	FALSE	2	FALSE	Reactome	Major pathway of rRNA processing in the nucleolus and cytosol
ENSG00000265681	RPL17	ribosomal protein L17	CHEMBL4297789	MT-3724	FALSE	2	FALSE	Reactome	Major pathway of rRNA processing in the nucleolus and cytosol
ENSG00000129824	RPS4Y1	ribosomal protein S4 Y-linked 1	CHEMBL256997	ATALUREN	TRUE	4	FALSE	Reactome	Major pathway of rRNA processing in the nucleolus and cytosol
ENSG00000129824	RPS4Y1	ribosomal protein S4 Y-linked 1	CHEMBL4297744	ELX-02	FALSE	2	FALSE	Reactome	Major pathway of rRNA processing in the nucleolus and cytosol
ENSG00000129824	RPS4Y1	ribosomal protein S4 Y-linked 1	CHEMBL4297789	MT-3724	FALSE	2	FALSE	Reactome	Major pathway of rRNA processing in the nucleolus and cytosol
ENSG00000149273	RPS3	ribosomal protein S3	CHEMBL256997	ATALUREN	TRUE	4	FALSE	Reactome	Major pathway of rRNA processing in the nucleolus and cytosol
ENSG00000149273	RPS3	ribosomal protein S3	CHEMBL4297789	MT-3724	FALSE	2	FALSE	Reactome	Major pathway of rRNA processing in the nucleolus and cytosol
ENSG00000149273	RPS3	ribosomal protein S3	CHEMBL4297744	ELX-02	FALSE	2	FALSE	Reactome	Major pathway of rRNA processing in the nucleolus and cytosol
ENSG00000112306	RPS12	ribosomal protein S12	CHEMBL256997	ATALUREN	TRUE	4	FALSE	Reactome	Major pathway of rRNA processing in the nucleolus and cytosol
ENSG00000112306	RPS12	ribosomal protein S12	CHEMBL4297744	ELX-02	FALSE	2	FALSE	Reactome	Major pathway of rRNA processing in the nucleolus and cytosol
ENSG00000112306	RPS12	ribosomal protein S12	CHEMBL4297789	MT-3724	FALSE	2	FALSE	Reactome	Major pathway of rRNA processing in the nucleolus and cytosol
ENSG00000167526	RPL13	ribosomal protein L13	CHEMBL256997	ATALUREN	TRUE	4	FALSE	Reactome	Major pathway of rRNA processing in the nucleolus and cytosol
ENSG00000167526	RPL13	ribosomal protein L13	CHEMBL4297789	MT-3724	FALSE	2	FALSE	Reactome	Major pathway of rRNA processing in the nucleolus and cytosol
ENSG00000167526	RPL13	ribosomal protein L13	CHEMBL4297744	ELX-02	FALSE	2	FALSE	Reactome	Major pathway of rRNA processing in the nucleolus and cytosol
ENSG00000147403	RPL10	ribosomal protein L10	CHEMBL256997	ATALUREN	TRUE	4	FALSE	Reactome	Major pathway of rRNA processing in the nucleolus and cytosol
ENSG00000147403	RPL10	ribosomal protein L10	CHEMBL4297744	ELX-02	FALSE	2	FALSE	Reactome	Major pathway of rRNA processing in the nucleolus and cytosol
ENSG00000147403	RPL10	ribosomal protein L10	CHEMBL4297789	MT-3724	FALSE	2	FALSE	Reactome	Major pathway of rRNA processing in the nucleolus and cytosol
ENSG00000197958	RPL12	ribosomal protein L12	CHEMBL256997	ATALUREN	TRUE	4	FALSE	Reactome	Major pathway of rRNA processing in the nucleolus and cytosol
ENSG00000197958	RPL12	ribosomal protein L12	CHEMBL4297744	ELX-02	FALSE	2	FALSE	Reactome	Major pathway of rRNA processing in the nucleolus and cytosol
ENSG00000197958	RPL12	ribosomal protein L12	CHEMBL4297789	MT-3724	FALSE	2	FALSE	Reactome	Major pathway of rRNA processing in the nucleolus and cytosol
ENSG00000163682	RPL9	ribosomal protein L9	CHEMBL256997	ATALUREN	TRUE	4	FALSE	Reactome	Major pathway of rRNA processing in the nucleolus and cytosol
ENSG00000163682	RPL9	ribosomal protein L9	CHEMBL4297744	ELX-02	FALSE	2	FALSE	Reactome	Major pathway of rRNA processing in the nucleolus and cytosol
ENSG00000163682	RPL9	ribosomal protein L9	CHEMBL4297789	MT-3724	FALSE	2	FALSE	Reactome	Major pathway of rRNA processing in the nucleolus and cytosol
ENSG00000116251	RPL22	ribosomal protein L22	CHEMBL256997	ATALUREN	TRUE	4	FALSE	Reactome	Major pathway of rRNA processing in the nucleolus and cytosol
ENSG00000116251	RPL22	ribosomal protein L22	CHEMBL4297789	MT-3724	FALSE	2	FALSE	Reactome	Major pathway of rRNA processing in the nucleolus and cytosol
ENSG00000116251	RPL22	ribosomal protein L22	CHEMBL4297744	ELX-02	FALSE	2	FALSE	Reactome	Major pathway of rRNA processing in the nucleolus and cytosol
ENSG00000174444	RPL4	ribosomal protein L4	CHEMBL256997	ATALUREN	TRUE	4	FALSE	Reactome	Major pathway of rRNA processing in the nucleolus and cytosol
ENSG00000174444	RPL4	ribosomal protein L4	CHEMBL4297744	ELX-02	FALSE	2	FALSE	Reactome	Major pathway of rRNA processing in the nucleolus and cytosol
ENSG00000174444	RPL4	ribosomal protein L4	CHEMBL4297789	MT-3724	FALSE	2	FALSE	Reactome	Major pathway of rRNA processing in the nucleolus and cytosol
ENSG00000105372	RPS19	ribosomal protein S19	CHEMBL256997	ATALUREN	TRUE	4	FALSE	Reactome	Major pathway of rRNA processing in the nucleolus and cytosol
ENSG00000105372	RPS19	ribosomal protein S19	CHEMBL4297744	ELX-02	FALSE	2	FALSE	Reactome	Major pathway of rRNA processing in the nucleolus and cytosol
ENSG00000105372	RPS19	ribosomal protein S19	CHEMBL4297789	MT-3724	FALSE	2	FALSE	Reactome	Major pathway of rRNA processing in the nucleolus and cytosol
ENSG00000100316	RPL3	ribosomal protein L3	CHEMBL256997	ATALUREN	TRUE	4	FALSE	Reactome	Major pathway of rRNA processing in the nucleolus and cytosol
ENSG00000100316	RPL3	ribosomal protein L3	CHEMBL4297744	ELX-02	FALSE	2	FALSE	Reactome	Major pathway of rRNA processing in the nucleolus and cytosol
ENSG00000100316	RPL3	ribosomal protein L3	CHEMBL4297789	MT-3724	FALSE	2	FALSE	Reactome	Major pathway of rRNA processing in the nucleolus and cytosol
ENSG00000142541	RPL13A	ribosomal protein L13a	CHEMBL256997	ATALUREN	TRUE	4	FALSE	Reactome	Major pathway of rRNA processing in the nucleolus and cytosol
ENSG00000142541	RPL13A	ribosomal protein L13a	CHEMBL4297789	MT-3724	FALSE	2	FALSE	Reactome	Major pathway of rRNA processing in the nucleolus and cytosol
ENSG00000142541	RPL13A	ribosomal protein L13a	CHEMBL4297744	ELX-02	FALSE	2	FALSE	Reactome	Major pathway of rRNA processing in the nucleolus and cytosol
ENSG00000177954	RPS27	ribosomal protein S27	CHEMBL256997	ATALUREN	TRUE	4	FALSE	Reactome	Major pathway of rRNA processing in the nucleolus and cytosol
ENSG00000177954	RPS27	ribosomal protein S27	CHEMBL4297744	ELX-02	FALSE	2	FALSE	Reactome	Major pathway of rRNA processing in the nucleolus and cytosol
ENSG00000177954	RPS27	ribosomal protein S27	CHEMBL4297789	MT-3724	FALSE	2	FALSE	Reactome	Major pathway of rRNA processing in the nucleolus and cytosol
ENSG00000136942	RPL35	ribosomal protein L35	CHEMBL256997	ATALUREN	TRUE	4	FALSE	Reactome	Major pathway of rRNA processing in the nucleolus and cytosol
ENSG00000136942	RPL35	ribosomal protein L35	CHEMBL4297789	MT-3724	FALSE	2	FALSE	Reactome	Major pathway of rRNA processing in the nucleolus and cytosol
ENSG00000136942	RPL35	ribosomal protein L35	CHEMBL4297744	ELX-02	FALSE	2	FALSE	Reactome	Major pathway of rRNA processing in the nucleolus and cytosol
ENSG00000166441	RPL27A	ribosomal protein L27a	CHEMBL256997	ATALUREN	TRUE	4	FALSE	Reactome	Major pathway of rRNA processing in the nucleolus and cytosol
ENSG00000166441	RPL27A	ribosomal protein L27a	CHEMBL4297744	ELX-02	FALSE	2	FALSE	Reactome	Major pathway of rRNA processing in the nucleolus and cytosol
ENSG00000166441	RPL27A	ribosomal protein L27a	CHEMBL4297789	MT-3724	FALSE	2	FALSE	Reactome	Major pathway of rRNA processing in the nucleolus and cytosol
ENSG00000122406	RPL5	ribosomal protein L5	CHEMBL256997	ATALUREN	TRUE	4	FALSE	Reactome	Major pathway of rRNA processing in the nucleolus and cytosol
ENSG00000122406	RPL5	ribosomal protein L5	CHEMBL4297744	ELX-02	FALSE	2	FALSE	Reactome	Major pathway of rRNA processing in the nucleolus and cytosol
ENSG00000122406	RPL5	ribosomal protein L5	CHEMBL4297789	MT-3724	FALSE	2	FALSE	Reactome	Major pathway of rRNA processing in the nucleolus and cytosol
ENSG00000122026	RPL21	ribosomal protein L21	CHEMBL256997	ATALUREN	TRUE	4	FALSE	Reactome	Major pathway of rRNA processing in the nucleolus and cytosol
ENSG00000122026	RPL21	ribosomal protein L21	CHEMBL4297744	ELX-02	FALSE	2	FALSE	Reactome	Major pathway of rRNA processing in the nucleolus and cytosol
ENSG00000122026	RPL21	ribosomal protein L21	CHEMBL4297789	MT-3724	FALSE	2	FALSE	Reactome	Major pathway of rRNA processing in the nucleolus and cytosol
ENSG00000108107	RPL28	ribosomal protein L28	CHEMBL256997	ATALUREN	TRUE	4	FALSE	Reactome	Major pathway of rRNA processing in the nucleolus and cytosol
ENSG00000108107	RPL28	ribosomal protein L28	CHEMBL4297744	ELX-02	FALSE	2	FALSE	Reactome	Major pathway of rRNA processing in the nucleolus and cytosol
ENSG00000108107	RPL28	ribosomal protein L28	CHEMBL4297789	MT-3724	FALSE	2	FALSE	Reactome	Major pathway of rRNA processing in the nucleolus and cytosol
ENSG00000083845	RPS5	ribosomal protein S5	CHEMBL256997	ATALUREN	TRUE	4	FALSE	Reactome	Major pathway of rRNA processing in the nucleolus and cytosol
ENSG00000083845	RPS5	ribosomal protein S5	CHEMBL4297744	ELX-02	FALSE	2	FALSE	Reactome	Major pathway of rRNA processing in the nucleolus and cytosol
ENSG00000083845	RPS5	ribosomal protein S5	CHEMBL4297789	MT-3724	FALSE	2	FALSE	Reactome	Major pathway of rRNA processing in the nucleolus and cytosol
ENSG00000124614	RPS10	ribosomal protein S10	CHEMBL256997	ATALUREN	TRUE	4	FALSE	Reactome	Major pathway of rRNA processing in the nucleolus and cytosol
ENSG00000124614	RPS10	ribosomal protein S10	CHEMBL4297744	ELX-02	FALSE	2	FALSE	Reactome	Major pathway of rRNA processing in the nucleolus and cytosol
ENSG00000124614	RPS10	ribosomal protein S10	CHEMBL4297789	MT-3724	FALSE	2	FALSE	Reactome	Major pathway of rRNA processing in the nucleolus and cytosol
ENSG00000162244	RPL29	ribosomal protein L29	CHEMBL256997	ATALUREN	TRUE	4	FALSE	Reactome	Major pathway of rRNA processing in the nucleolus and cytosol
ENSG00000162244	RPL29	ribosomal protein L29	CHEMBL4297789	MT-3724	FALSE	2	FALSE	Reactome	Major pathway of rRNA processing in the nucleolus and cytosol
ENSG00000162244	RPL29	ribosomal protein L29	CHEMBL4297744	ELX-02	FALSE	2	FALSE	Reactome	Major pathway of rRNA processing in the nucleolus and cytosol
ENSG00000109475	RPL34	ribosomal protein L34	CHEMBL256997	ATALUREN	TRUE	4	FALSE	Reactome	Major pathway of rRNA processing in the nucleolus and cytosol
ENSG00000109475	RPL34	ribosomal protein L34	CHEMBL4297789	MT-3724	FALSE	2	FALSE	Reactome	Major pathway of rRNA processing in the nucleolus and cytosol
ENSG00000109475	RPL34	ribosomal protein L34	CHEMBL4297744	ELX-02	FALSE	2	FALSE	Reactome	Major pathway of rRNA processing in the nucleolus and cytosol
ENSG00000213923	CSNK1E	casein kinase 1 epsilon	CHEMBL3989869	UMBRALISIB TOSYLATE	TRUE	4	FALSE	Reactome	Major pathway of rRNA processing in the nucleolus and cytosol
ENSG00000213923	CSNK1E	casein kinase 1 epsilon	CHEMBL3948730	UMBRALISIB	TRUE	4	FALSE	Reactome	Major pathway of rRNA processing in the nucleolus and cytosol
ENSG00000188846	RPL14	ribosomal protein L14	CHEMBL256997	ATALUREN	TRUE	4	FALSE	Reactome	Major pathway of rRNA processing in the nucleolus and cytosol
ENSG00000188846	RPL14	ribosomal protein L14	CHEMBL4297744	ELX-02	FALSE	2	FALSE	Reactome	Major pathway of rRNA processing in the nucleolus and cytosol
ENSG00000188846	RPL14	ribosomal protein L14	CHEMBL4297789	MT-3724	FALSE	2	FALSE	Reactome	Major pathway of rRNA processing in the nucleolus and cytosol
ENSG00000008988	RPS20	ribosomal protein S20	CHEMBL256997	ATALUREN	TRUE	4	FALSE	Reactome	Major pathway of rRNA processing in the nucleolus and cytosol
ENSG00000008988	RPS20	ribosomal protein S20	CHEMBL4297744	ELX-02	FALSE	2	FALSE	Reactome	Major pathway of rRNA processing in the nucleolus and cytosol
ENSG00000008988	RPS20	ribosomal protein S20	CHEMBL4297789	MT-3724	FALSE	2	FALSE	Reactome	Major pathway of rRNA processing in the nucleolus and cytosol
ENSG00000145425	RPS3A	ribosomal protein S3A	CHEMBL256997	ATALUREN	TRUE	4	FALSE	Reactome	Major pathway of rRNA processing in the nucleolus and cytosol
ENSG00000145425	RPS3A	ribosomal protein S3A	CHEMBL4297744	ELX-02	FALSE	2	FALSE	Reactome	Major pathway of rRNA processing in the nucleolus and cytosol
ENSG00000145425	RPS3A	ribosomal protein S3A	CHEMBL4297789	MT-3724	FALSE	2	FALSE	Reactome	Major pathway of rRNA processing in the nucleolus and cytosol
ENSG00000161970	RPL26	ribosomal protein L26	CHEMBL256997	ATALUREN	TRUE	4	FALSE	Reactome	Major pathway of rRNA processing in the nucleolus and cytosol
ENSG00000161970	RPL26	ribosomal protein L26	CHEMBL4297789	MT-3724	FALSE	2	FALSE	Reactome	Major pathway of rRNA processing in the nucleolus and cytosol
ENSG00000161970	RPL26	ribosomal protein L26	CHEMBL4297744	ELX-02	FALSE	2	FALSE	Reactome	Major pathway of rRNA processing in the nucleolus and cytosol
ENSG00000174748	RPL15	ribosomal protein L15	CHEMBL256997	ATALUREN	TRUE	4	FALSE	Reactome	Major pathway of rRNA processing in the nucleolus and cytosol
ENSG00000174748	RPL15	ribosomal protein L15	CHEMBL4297789	MT-3724	FALSE	2	FALSE	Reactome	Major pathway of rRNA processing in the nucleolus and cytosol
ENSG00000174748	RPL15	ribosomal protein L15	CHEMBL4297744	ELX-02	FALSE	2	FALSE	Reactome	Major pathway of rRNA processing in the nucleolus and cytosol
ENSG00000131469	RPL27	ribosomal protein L27	CHEMBL256997	ATALUREN	TRUE	4	FALSE	Reactome	Major pathway of rRNA processing in the nucleolus and cytosol
ENSG00000131469	RPL27	ribosomal protein L27	CHEMBL4297744	ELX-02	FALSE	2	FALSE	Reactome	Major pathway of rRNA processing in the nucleolus and cytosol
ENSG00000131469	RPL27	ribosomal protein L27	CHEMBL4297789	MT-3724	FALSE	2	FALSE	Reactome	Major pathway of rRNA processing in the nucleolus and cytosol
ENSG00000197756	RPL37A	ribosomal protein L37a	CHEMBL256997	ATALUREN	TRUE	4	FALSE	Reactome	Major pathway of rRNA processing in the nucleolus and cytosol
ENSG00000197756	RPL37A	ribosomal protein L37a	CHEMBL4297744	ELX-02	FALSE	2	FALSE	Reactome	Major pathway of rRNA processing in the nucleolus and cytosol
ENSG00000197756	RPL37A	ribosomal protein L37a	CHEMBL4297789	MT-3724	FALSE	2	FALSE	Reactome	Major pathway of rRNA processing in the nucleolus and cytosol
ENSG00000145592	RPL37	ribosomal protein L37	CHEMBL256997	ATALUREN	TRUE	4	FALSE	Reactome	Major pathway of rRNA processing in the nucleolus and cytosol
ENSG00000145592	RPL37	ribosomal protein L37	CHEMBL4297744	ELX-02	FALSE	2	FALSE	Reactome	Major pathway of rRNA processing in the nucleolus and cytosol
ENSG00000145592	RPL37	ribosomal protein L37	CHEMBL4297789	MT-3724	FALSE	2	FALSE	Reactome	Major pathway of rRNA processing in the nucleolus and cytosol
ENSG00000171863	RPS7	ribosomal protein S7	CHEMBL256997	ATALUREN	TRUE	4	FALSE	Reactome	Major pathway of rRNA processing in the nucleolus and cytosol
ENSG00000171863	RPS7	ribosomal protein S7	CHEMBL4297789	MT-3724	FALSE	2	FALSE	Reactome	Major pathway of rRNA processing in the nucleolus and cytosol
ENSG00000171863	RPS7	ribosomal protein S7	CHEMBL4297744	ELX-02	FALSE	2	FALSE	Reactome	Major pathway of rRNA processing in the nucleolus and cytosol
ENSG00000142937	RPS8	ribosomal protein S8	CHEMBL256997	ATALUREN	TRUE	4	FALSE	Reactome	Major pathway of rRNA processing in the nucleolus and cytosol
ENSG00000142937	RPS8	ribosomal protein S8	CHEMBL4297789	MT-3724	FALSE	2	FALSE	Reactome	Major pathway of rRNA processing in the nucleolus and cytosol
ENSG00000142937	RPS8	ribosomal protein S8	CHEMBL4297744	ELX-02	FALSE	2	FALSE	Reactome	Major pathway of rRNA processing in the nucleolus and cytosol
ENSG00000134419	RPS15A	ribosomal protein S15a	CHEMBL256997	ATALUREN	TRUE	4	FALSE	Reactome	Major pathway of rRNA processing in the nucleolus and cytosol
ENSG00000134419	RPS15A	ribosomal protein S15a	CHEMBL4297744	ELX-02	FALSE	2	FALSE	Reactome	Major pathway of rRNA processing in the nucleolus and cytosol
ENSG00000134419	RPS15A	ribosomal protein S15a	CHEMBL4297789	MT-3724	FALSE	2	FALSE	Reactome	Major pathway of rRNA processing in the nucleolus and cytosol
ENSG00000105193	RPS16	ribosomal protein S16	CHEMBL256997	ATALUREN	TRUE	4	FALSE	Reactome	Major pathway of rRNA processing in the nucleolus and cytosol
ENSG00000105193	RPS16	ribosomal protein S16	CHEMBL4297789	MT-3724	FALSE	2	FALSE	Reactome	Major pathway of rRNA processing in the nucleolus and cytosol
ENSG00000105193	RPS16	ribosomal protein S16	CHEMBL4297744	ELX-02	FALSE	2	FALSE	Reactome	Major pathway of rRNA processing in the nucleolus and cytosol
ENSG00000164587	RPS14	ribosomal protein S14	CHEMBL256997	ATALUREN	TRUE	4	FALSE	Reactome	Major pathway of rRNA processing in the nucleolus and cytosol
ENSG00000164587	RPS14	ribosomal protein S14	CHEMBL4297789	MT-3724	FALSE	2	FALSE	Reactome	Major pathway of rRNA processing in the nucleolus and cytosol
ENSG00000164587	RPS14	ribosomal protein S14	CHEMBL4297744	ELX-02	FALSE	2	FALSE	Reactome	Major pathway of rRNA processing in the nucleolus and cytosol
ENSG00000186468	RPS23	ribosomal protein S23	CHEMBL256997	ATALUREN	TRUE	4	FALSE	Reactome	Major pathway of rRNA processing in the nucleolus and cytosol
ENSG00000186468	RPS23	ribosomal protein S23	CHEMBL4297744	ELX-02	FALSE	2	FALSE	Reactome	Major pathway of rRNA processing in the nucleolus and cytosol
ENSG00000186468	RPS23	ribosomal protein S23	CHEMBL4297789	MT-3724	FALSE	2	FALSE	Reactome	Major pathway of rRNA processing in the nucleolus and cytosol
ENSG00000213741	RPS29	ribosomal protein S29	CHEMBL256997	ATALUREN	TRUE	4	FALSE	Reactome	Major pathway of rRNA processing in the nucleolus and cytosol
ENSG00000213741	RPS29	ribosomal protein S29	CHEMBL4297744	ELX-02	FALSE	2	FALSE	Reactome	Major pathway of rRNA processing in the nucleolus and cytosol
ENSG00000213741	RPS29	ribosomal protein S29	CHEMBL4297789	MT-3724	FALSE	2	FALSE	Reactome	Major pathway of rRNA processing in the nucleolus and cytosol
ENSG00000110700	RPS13	ribosomal protein S13	CHEMBL256997	ATALUREN	TRUE	4	FALSE	Reactome	Major pathway of rRNA processing in the nucleolus and cytosol
ENSG00000110700	RPS13	ribosomal protein S13	CHEMBL4297744	ELX-02	FALSE	2	FALSE	Reactome	Major pathway of rRNA processing in the nucleolus and cytosol
ENSG00000110700	RPS13	ribosomal protein S13	CHEMBL4297789	MT-3724	FALSE	2	FALSE	Reactome	Major pathway of rRNA processing in the nucleolus and cytosol
ENSG00000142534	RPS11	ribosomal protein S11	CHEMBL256997	ATALUREN	TRUE	4	FALSE	Reactome	Major pathway of rRNA processing in the nucleolus and cytosol
ENSG00000142534	RPS11	ribosomal protein S11	CHEMBL4297744	ELX-02	FALSE	2	FALSE	Reactome	Major pathway of rRNA processing in the nucleolus and cytosol
ENSG00000142534	RPS11	ribosomal protein S11	CHEMBL4297789	MT-3724	FALSE	2	FALSE	Reactome	Major pathway of rRNA processing in the nucleolus and cytosol
ENSG00000198034	RPS4X	ribosomal protein S4 X-linked	CHEMBL256997	ATALUREN	TRUE	4	FALSE	Reactome	Major pathway of rRNA processing in the nucleolus and cytosol
ENSG00000198034	RPS4X	ribosomal protein S4 X-linked	CHEMBL4297744	ELX-02	FALSE	2	FALSE	Reactome	Major pathway of rRNA processing in the nucleolus and cytosol
ENSG00000198034	RPS4X	ribosomal protein S4 X-linked	CHEMBL4297789	MT-3724	FALSE	2	FALSE	Reactome	Major pathway of rRNA processing in the nucleolus and cytosol
ENSG00000198242	RPL23A	ribosomal protein L23a	CHEMBL256997	ATALUREN	TRUE	4	FALSE	Reactome	Major pathway of rRNA processing in the nucleolus and cytosol
ENSG00000198242	RPL23A	ribosomal protein L23a	CHEMBL4297744	ELX-02	FALSE	2	FALSE	Reactome	Major pathway of rRNA processing in the nucleolus and cytosol
ENSG00000198242	RPL23A	ribosomal protein L23a	CHEMBL4297789	MT-3724	FALSE	2	FALSE	Reactome	Major pathway of rRNA processing in the nucleolus and cytosol
ENSG00000137154	RPS6	ribosomal protein S6	CHEMBL256997	ATALUREN	TRUE	4	FALSE	Reactome	Major pathway of rRNA processing in the nucleolus and cytosol
ENSG00000137154	RPS6	ribosomal protein S6	CHEMBL4297744	ELX-02	FALSE	2	FALSE	Reactome	Major pathway of rRNA processing in the nucleolus and cytosol
ENSG00000137154	RPS6	ribosomal protein S6	CHEMBL4297789	MT-3724	FALSE	2	FALSE	Reactome	Major pathway of rRNA processing in the nucleolus and cytosol
ENSG00000125691	RPL23	ribosomal protein L23	CHEMBL256997	ATALUREN	TRUE	4	FALSE	Reactome	Major pathway of rRNA processing in the nucleolus and cytosol
ENSG00000125691	RPL23	ribosomal protein L23	CHEMBL4297789	MT-3724	FALSE	2	FALSE	Reactome	Major pathway of rRNA processing in the nucleolus and cytosol
ENSG00000125691	RPL23	ribosomal protein L23	CHEMBL4297744	ELX-02	FALSE	2	FALSE	Reactome	Major pathway of rRNA processing in the nucleolus and cytosol
ENSG00000115268	RPS15	ribosomal protein S15	CHEMBL256997	ATALUREN	TRUE	4	FALSE	Reactome	Major pathway of rRNA processing in the nucleolus and cytosol
ENSG00000115268	RPS15	ribosomal protein S15	CHEMBL4297744	ELX-02	FALSE	2	FALSE	Reactome	Major pathway of rRNA processing in the nucleolus and cytosol
ENSG00000115268	RPS15	ribosomal protein S15	CHEMBL4297789	MT-3724	FALSE	2	FALSE	Reactome	Major pathway of rRNA processing in the nucleolus and cytosol
ENSG00000138326	RPS24	ribosomal protein S24	CHEMBL256997	ATALUREN	TRUE	4	FALSE	Reactome	Major pathway of rRNA processing in the nucleolus and cytosol
ENSG00000138326	RPS24	ribosomal protein S24	CHEMBL4297789	MT-3724	FALSE	2	FALSE	Reactome	Major pathway of rRNA processing in the nucleolus and cytosol
ENSG00000138326	RPS24	ribosomal protein S24	CHEMBL4297744	ELX-02	FALSE	2	FALSE	Reactome	Major pathway of rRNA processing in the nucleolus and cytosol
ENSG00000197728	RPS26	ribosomal protein S26	CHEMBL256997	ATALUREN	TRUE	4	FALSE	Reactome	Major pathway of rRNA processing in the nucleolus and cytosol
ENSG00000197728	RPS26	ribosomal protein S26	CHEMBL4297744	ELX-02	FALSE	2	FALSE	Reactome	Major pathway of rRNA processing in the nucleolus and cytosol
ENSG00000197728	RPS26	ribosomal protein S26	CHEMBL4297789	MT-3724	FALSE	2	FALSE	Reactome	Major pathway of rRNA processing in the nucleolus and cytosol
ENSG00000233927	RPS28	ribosomal protein S28	CHEMBL256997	ATALUREN	TRUE	4	FALSE	Reactome	Major pathway of rRNA processing in the nucleolus and cytosol
ENSG00000233927	RPS28	ribosomal protein S28	CHEMBL4297744	ELX-02	FALSE	2	FALSE	Reactome	Major pathway of rRNA processing in the nucleolus and cytosol
ENSG00000233927	RPS28	ribosomal protein S28	CHEMBL4297789	MT-3724	FALSE	2	FALSE	Reactome	Major pathway of rRNA processing in the nucleolus and cytosol
ENSG00000149806	FAU	FAU ubiquitin like and ribosomal protein S30 fusion	CHEMBL256997	ATALUREN	TRUE	4	FALSE	Reactome	Major pathway of rRNA processing in the nucleolus and cytosol
ENSG00000149806	FAU	FAU ubiquitin like and ribosomal protein S30 fusion	CHEMBL4297744	ELX-02	FALSE	2	FALSE	Reactome	Major pathway of rRNA processing in the nucleolus and cytosol
ENSG00000149806	FAU	FAU ubiquitin like and ribosomal protein S30 fusion	CHEMBL4297789	MT-3724	FALSE	2	FALSE	Reactome	Major pathway of rRNA processing in the nucleolus and cytosol
ENSG00000156482	RPL30	ribosomal protein L30	CHEMBL256997	ATALUREN	TRUE	4	FALSE	Reactome	Major pathway of rRNA processing in the nucleolus and cytosol
ENSG00000156482	RPL30	ribosomal protein L30	CHEMBL4297789	MT-3724	FALSE	2	FALSE	Reactome	Major pathway of rRNA processing in the nucleolus and cytosol
ENSG00000156482	RPL30	ribosomal protein L30	CHEMBL4297744	ELX-02	FALSE	2	FALSE	Reactome	Major pathway of rRNA processing in the nucleolus and cytosol
ENSG00000198918	RPL39	ribosomal protein L39	CHEMBL256997	ATALUREN	TRUE	4	FALSE	Reactome	Major pathway of rRNA processing in the nucleolus and cytosol
ENSG00000198918	RPL39	ribosomal protein L39	CHEMBL4297744	ELX-02	FALSE	2	FALSE	Reactome	Major pathway of rRNA processing in the nucleolus and cytosol
ENSG00000198918	RPL39	ribosomal protein L39	CHEMBL4297789	MT-3724	FALSE	2	FALSE	Reactome	Major pathway of rRNA processing in the nucleolus and cytosol
ENSG00000071082	RPL31	ribosomal protein L31	CHEMBL256997	ATALUREN	TRUE	4	FALSE	Reactome	Major pathway of rRNA processing in the nucleolus and cytosol
ENSG00000071082	RPL31	ribosomal protein L31	CHEMBL4297744	ELX-02	FALSE	2	FALSE	Reactome	Major pathway of rRNA processing in the nucleolus and cytosol
ENSG00000071082	RPL31	ribosomal protein L31	CHEMBL4297789	MT-3724	FALSE	2	FALSE	Reactome	Major pathway of rRNA processing in the nucleolus and cytosol
ENSG00000198755	RPL10A	ribosomal protein L10a	CHEMBL256997	ATALUREN	TRUE	4	FALSE	Reactome	Major pathway of rRNA processing in the nucleolus and cytosol
ENSG00000198755	RPL10A	ribosomal protein L10a	CHEMBL4297789	MT-3724	FALSE	2	FALSE	Reactome	Major pathway of rRNA processing in the nucleolus and cytosol
ENSG00000198755	RPL10A	ribosomal protein L10a	CHEMBL4297744	ELX-02	FALSE	2	FALSE	Reactome	Major pathway of rRNA processing in the nucleolus and cytosol
ENSG00000144713	RPL32	ribosomal protein L32	CHEMBL256997	ATALUREN	TRUE	4	FALSE	Reactome	Major pathway of rRNA processing in the nucleolus and cytosol
ENSG00000144713	RPL32	ribosomal protein L32	CHEMBL4297744	ELX-02	FALSE	2	FALSE	Reactome	Major pathway of rRNA processing in the nucleolus and cytosol
ENSG00000144713	RPL32	ribosomal protein L32	CHEMBL4297789	MT-3724	FALSE	2	FALSE	Reactome	Major pathway of rRNA processing in the nucleolus and cytosol
ENSG00000142676	RPL11	ribosomal protein L11	CHEMBL256997	ATALUREN	TRUE	4	FALSE	Reactome	Major pathway of rRNA processing in the nucleolus and cytosol
ENSG00000142676	RPL11	ribosomal protein L11	CHEMBL4297789	MT-3724	FALSE	2	FALSE	Reactome	Major pathway of rRNA processing in the nucleolus and cytosol
ENSG00000142676	RPL11	ribosomal protein L11	CHEMBL4297744	ELX-02	FALSE	2	FALSE	Reactome	Major pathway of rRNA processing in the nucleolus and cytosol
ENSG00000161016	RPL8	ribosomal protein L8	CHEMBL256997	ATALUREN	TRUE	4	FALSE	Reactome	Major pathway of rRNA processing in the nucleolus and cytosol
ENSG00000161016	RPL8	ribosomal protein L8	CHEMBL4297744	ELX-02	FALSE	2	FALSE	Reactome	Major pathway of rRNA processing in the nucleolus and cytosol
ENSG00000161016	RPL8	ribosomal protein L8	CHEMBL4297789	MT-3724	FALSE	2	FALSE	Reactome	Major pathway of rRNA processing in the nucleolus and cytosol
ENSG00000229117	RPL41	ribosomal protein L41	CHEMBL256997	ATALUREN	TRUE	4	FALSE	Reactome	Major pathway of rRNA processing in the nucleolus and cytosol
ENSG00000229117	RPL41	ribosomal protein L41	CHEMBL4297744	ELX-02	FALSE	2	FALSE	Reactome	Major pathway of rRNA processing in the nucleolus and cytosol
ENSG00000229117	RPL41	ribosomal protein L41	CHEMBL4297789	MT-3724	FALSE	2	FALSE	Reactome	Major pathway of rRNA processing in the nucleolus and cytosol
ENSG00000143947	RPS27A	ribosomal protein S27a	CHEMBL256997	ATALUREN	TRUE	4	FALSE	Reactome	Major pathway of rRNA processing in the nucleolus and cytosol
ENSG00000143947	RPS27A	ribosomal protein S27a	CHEMBL4297744	ELX-02	FALSE	2	FALSE	Reactome	Major pathway of rRNA processing in the nucleolus and cytosol
ENSG00000143947	RPS27A	ribosomal protein S27a	CHEMBL4297789	MT-3724	FALSE	2	FALSE	Reactome	Major pathway of rRNA processing in the nucleolus and cytosol
ENSG00000172809	RPL38	ribosomal protein L38	CHEMBL256997	ATALUREN	TRUE	4	FALSE	Reactome	Major pathway of rRNA processing in the nucleolus and cytosol
ENSG00000172809	RPL38	ribosomal protein L38	CHEMBL4297744	ELX-02	FALSE	2	FALSE	Reactome	Major pathway of rRNA processing in the nucleolus and cytosol
ENSG00000172809	RPL38	ribosomal protein L38	CHEMBL4297789	MT-3724	FALSE	2	FALSE	Reactome	Major pathway of rRNA processing in the nucleolus and cytosol
ENSG00000171858	RPS21	ribosomal protein S21	CHEMBL256997	ATALUREN	TRUE	4	FALSE	Reactome	Major pathway of rRNA processing in the nucleolus and cytosol
ENSG00000171858	RPS21	ribosomal protein S21	CHEMBL4297744	ELX-02	FALSE	2	FALSE	Reactome	Major pathway of rRNA processing in the nucleolus and cytosol
ENSG00000171858	RPS21	ribosomal protein S21	CHEMBL4297789	MT-3724	FALSE	2	FALSE	Reactome	Major pathway of rRNA processing in the nucleolus and cytosol
ENSG00000114391	RPL24	ribosomal protein L24	CHEMBL256997	ATALUREN	TRUE	4	FALSE	Reactome	Major pathway of rRNA processing in the nucleolus and cytosol
ENSG00000114391	RPL24	ribosomal protein L24	CHEMBL4297744	ELX-02	FALSE	2	FALSE	Reactome	Major pathway of rRNA processing in the nucleolus and cytosol
ENSG00000114391	RPL24	ribosomal protein L24	CHEMBL4297789	MT-3724	FALSE	2	FALSE	Reactome	Major pathway of rRNA processing in the nucleolus and cytosol
ENSG00000241343	RPL36A	ribosomal protein L36a	CHEMBL256997	ATALUREN	TRUE	4	FALSE	Reactome	Major pathway of rRNA processing in the nucleolus and cytosol
ENSG00000241343	RPL36A	ribosomal protein L36a	CHEMBL4297744	ELX-02	FALSE	2	FALSE	Reactome	Major pathway of rRNA processing in the nucleolus and cytosol
ENSG00000241343	RPL36A	ribosomal protein L36a	CHEMBL4297789	MT-3724	FALSE	2	FALSE	Reactome	Major pathway of rRNA processing in the nucleolus and cytosol
ENSG00000108298	RPL19	ribosomal protein L19	CHEMBL256997	ATALUREN	TRUE	4	FALSE	Reactome	Major pathway of rRNA processing in the nucleolus and cytosol
ENSG00000108298	RPL19	ribosomal protein L19	CHEMBL4297744	ELX-02	FALSE	2	FALSE	Reactome	Major pathway of rRNA processing in the nucleolus and cytosol
ENSG00000108298	RPL19	ribosomal protein L19	CHEMBL4297789	MT-3724	FALSE	2	FALSE	Reactome	Major pathway of rRNA processing in the nucleolus and cytosol
ENSG00000105640	RPL18A	ribosomal protein L18a	CHEMBL256997	ATALUREN	TRUE	4	FALSE	Reactome	Major pathway of rRNA processing in the nucleolus and cytosol
ENSG00000105640	RPL18A	ribosomal protein L18a	CHEMBL4297744	ELX-02	FALSE	2	FALSE	Reactome	Major pathway of rRNA processing in the nucleolus and cytosol
ENSG00000105640	RPL18A	ribosomal protein L18a	CHEMBL4297789	MT-3724	FALSE	2	FALSE	Reactome	Major pathway of rRNA processing in the nucleolus and cytosol
ENSG00000089009	RPL6	ribosomal protein L6	CHEMBL256997	ATALUREN	TRUE	4	FALSE	Reactome	Major pathway of rRNA processing in the nucleolus and cytosol
ENSG00000089009	RPL6	ribosomal protein L6	CHEMBL4297744	ELX-02	FALSE	2	FALSE	Reactome	Major pathway of rRNA processing in the nucleolus and cytosol
ENSG00000089009	RPL6	ribosomal protein L6	CHEMBL4297789	MT-3724	FALSE	2	FALSE	Reactome	Major pathway of rRNA processing in the nucleolus and cytosol
ENSG00000063177	RPL18	ribosomal protein L18	CHEMBL256997	ATALUREN	TRUE	4	FALSE	Reactome	Major pathway of rRNA processing in the nucleolus and cytosol
ENSG00000063177	RPL18	ribosomal protein L18	CHEMBL4297744	ELX-02	FALSE	2	FALSE	Reactome	Major pathway of rRNA processing in the nucleolus and cytosol
ENSG00000063177	RPL18	ribosomal protein L18	CHEMBL4297789	MT-3724	FALSE	2	FALSE	Reactome	Major pathway of rRNA processing in the nucleolus and cytosol
ENSG00000130255	RPL36	ribosomal protein L36	CHEMBL256997	ATALUREN	TRUE	4	FALSE	Reactome	Major pathway of rRNA processing in the nucleolus and cytosol
ENSG00000130255	RPL36	ribosomal protein L36	CHEMBL4297744	ELX-02	FALSE	2	FALSE	Reactome	Major pathway of rRNA processing in the nucleolus and cytosol
ENSG00000130255	RPL36	ribosomal protein L36	CHEMBL4297789	MT-3724	FALSE	2	FALSE	Reactome	Major pathway of rRNA processing in the nucleolus and cytosol
ENSG00000137818	RPLP1	ribosomal protein lateral stalk subunit P1	CHEMBL256997	ATALUREN	TRUE	4	FALSE	Reactome	rRNA processing in the nucleus and cytosol
ENSG00000137818	RPLP1	ribosomal protein lateral stalk subunit P1	CHEMBL4297789	MT-3724	FALSE	2	FALSE	Reactome	rRNA processing in the nucleus and cytosol
ENSG00000137818	RPLP1	ribosomal protein lateral stalk subunit P1	CHEMBL4297744	ELX-02	FALSE	2	FALSE	Reactome	rRNA processing in the nucleus and cytosol
ENSG00000089157	RPLP0	ribosomal protein lateral stalk subunit P0	CHEMBL256997	ATALUREN	TRUE	4	FALSE	Reactome	rRNA processing in the nucleus and cytosol
ENSG00000089157	RPLP0	ribosomal protein lateral stalk subunit P0	CHEMBL4297789	MT-3724	FALSE	2	FALSE	Reactome	rRNA processing in the nucleus and cytosol
ENSG00000089157	RPLP0	ribosomal protein lateral stalk subunit P0	CHEMBL4297744	ELX-02	FALSE	2	FALSE	Reactome	rRNA processing in the nucleus and cytosol
ENSG00000168028	RPSA	ribosomal protein SA	CHEMBL256997	ATALUREN	TRUE	4	FALSE	Reactome	rRNA processing in the nucleus and cytosol
ENSG00000168028	RPSA	ribosomal protein SA	CHEMBL4297744	ELX-02	FALSE	2	FALSE	Reactome	rRNA processing in the nucleus and cytosol
ENSG00000168028	RPSA	ribosomal protein SA	CHEMBL4297789	MT-3724	FALSE	2	FALSE	Reactome	rRNA processing in the nucleus and cytosol
ENSG00000140988	RPS2	ribosomal protein S2	CHEMBL256997	ATALUREN	TRUE	4	FALSE	Reactome	rRNA processing in the nucleus and cytosol
ENSG00000140988	RPS2	ribosomal protein S2	CHEMBL4297744	ELX-02	FALSE	2	FALSE	Reactome	rRNA processing in the nucleus and cytosol
ENSG00000140988	RPS2	ribosomal protein S2	CHEMBL4297789	MT-3724	FALSE	2	FALSE	Reactome	rRNA processing in the nucleus and cytosol
ENSG00000182899	RPL35A	ribosomal protein L35a	CHEMBL256997	ATALUREN	TRUE	4	FALSE	Reactome	rRNA processing in the nucleus and cytosol
ENSG00000182899	RPL35A	ribosomal protein L35a	CHEMBL4297789	MT-3724	FALSE	2	FALSE	Reactome	rRNA processing in the nucleus and cytosol
ENSG00000182899	RPL35A	ribosomal protein L35a	CHEMBL4297744	ELX-02	FALSE	2	FALSE	Reactome	rRNA processing in the nucleus and cytosol
ENSG00000147604	RPL7	ribosomal protein L7	CHEMBL256997	ATALUREN	TRUE	4	FALSE	Reactome	rRNA processing in the nucleus and cytosol
ENSG00000147604	RPL7	ribosomal protein L7	CHEMBL4297744	ELX-02	FALSE	2	FALSE	Reactome	rRNA processing in the nucleus and cytosol
ENSG00000147604	RPL7	ribosomal protein L7	CHEMBL4297789	MT-3724	FALSE	2	FALSE	Reactome	rRNA processing in the nucleus and cytosol
ENSG00000265681	RPL17	ribosomal protein L17	CHEMBL256997	ATALUREN	TRUE	4	FALSE	Reactome	rRNA processing in the nucleus and cytosol
ENSG00000265681	RPL17	ribosomal protein L17	CHEMBL4297744	ELX-02	FALSE	2	FALSE	Reactome	rRNA processing in the nucleus and cytosol
ENSG00000265681	RPL17	ribosomal protein L17	CHEMBL4297789	MT-3724	FALSE	2	FALSE	Reactome	rRNA processing in the nucleus and cytosol
ENSG00000129824	RPS4Y1	ribosomal protein S4 Y-linked 1	CHEMBL256997	ATALUREN	TRUE	4	FALSE	Reactome	rRNA processing in the nucleus and cytosol
ENSG00000129824	RPS4Y1	ribosomal protein S4 Y-linked 1	CHEMBL4297744	ELX-02	FALSE	2	FALSE	Reactome	rRNA processing in the nucleus and cytosol
ENSG00000129824	RPS4Y1	ribosomal protein S4 Y-linked 1	CHEMBL4297789	MT-3724	FALSE	2	FALSE	Reactome	rRNA processing in the nucleus and cytosol
ENSG00000149273	RPS3	ribosomal protein S3	CHEMBL256997	ATALUREN	TRUE	4	FALSE	Reactome	rRNA processing in the nucleus and cytosol
ENSG00000149273	RPS3	ribosomal protein S3	CHEMBL4297789	MT-3724	FALSE	2	FALSE	Reactome	rRNA processing in the nucleus and cytosol
ENSG00000149273	RPS3	ribosomal protein S3	CHEMBL4297744	ELX-02	FALSE	2	FALSE	Reactome	rRNA processing in the nucleus and cytosol
ENSG00000112306	RPS12	ribosomal protein S12	CHEMBL256997	ATALUREN	TRUE	4	FALSE	Reactome	rRNA processing in the nucleus and cytosol
ENSG00000112306	RPS12	ribosomal protein S12	CHEMBL4297744	ELX-02	FALSE	2	FALSE	Reactome	rRNA processing in the nucleus and cytosol
ENSG00000112306	RPS12	ribosomal protein S12	CHEMBL4297789	MT-3724	FALSE	2	FALSE	Reactome	rRNA processing in the nucleus and cytosol
ENSG00000167526	RPL13	ribosomal protein L13	CHEMBL256997	ATALUREN	TRUE	4	FALSE	Reactome	rRNA processing in the nucleus and cytosol
ENSG00000167526	RPL13	ribosomal protein L13	CHEMBL4297789	MT-3724	FALSE	2	FALSE	Reactome	rRNA processing in the nucleus and cytosol
ENSG00000167526	RPL13	ribosomal protein L13	CHEMBL4297744	ELX-02	FALSE	2	FALSE	Reactome	rRNA processing in the nucleus and cytosol
ENSG00000147403	RPL10	ribosomal protein L10	CHEMBL256997	ATALUREN	TRUE	4	FALSE	Reactome	rRNA processing in the nucleus and cytosol
ENSG00000147403	RPL10	ribosomal protein L10	CHEMBL4297744	ELX-02	FALSE	2	FALSE	Reactome	rRNA processing in the nucleus and cytosol
ENSG00000147403	RPL10	ribosomal protein L10	CHEMBL4297789	MT-3724	FALSE	2	FALSE	Reactome	rRNA processing in the nucleus and cytosol
ENSG00000197958	RPL12	ribosomal protein L12	CHEMBL256997	ATALUREN	TRUE	4	FALSE	Reactome	rRNA processing in the nucleus and cytosol
ENSG00000197958	RPL12	ribosomal protein L12	CHEMBL4297744	ELX-02	FALSE	2	FALSE	Reactome	rRNA processing in the nucleus and cytosol
ENSG00000197958	RPL12	ribosomal protein L12	CHEMBL4297789	MT-3724	FALSE	2	FALSE	Reactome	rRNA processing in the nucleus and cytosol
ENSG00000163682	RPL9	ribosomal protein L9	CHEMBL256997	ATALUREN	TRUE	4	FALSE	Reactome	rRNA processing in the nucleus and cytosol
ENSG00000163682	RPL9	ribosomal protein L9	CHEMBL4297744	ELX-02	FALSE	2	FALSE	Reactome	rRNA processing in the nucleus and cytosol
ENSG00000163682	RPL9	ribosomal protein L9	CHEMBL4297789	MT-3724	FALSE	2	FALSE	Reactome	rRNA processing in the nucleus and cytosol
ENSG00000116251	RPL22	ribosomal protein L22	CHEMBL256997	ATALUREN	TRUE	4	FALSE	Reactome	rRNA processing in the nucleus and cytosol
ENSG00000116251	RPL22	ribosomal protein L22	CHEMBL4297789	MT-3724	FALSE	2	FALSE	Reactome	rRNA processing in the nucleus and cytosol
ENSG00000116251	RPL22	ribosomal protein L22	CHEMBL4297744	ELX-02	FALSE	2	FALSE	Reactome	rRNA processing in the nucleus and cytosol
ENSG00000174444	RPL4	ribosomal protein L4	CHEMBL256997	ATALUREN	TRUE	4	FALSE	Reactome	rRNA processing in the nucleus and cytosol
ENSG00000174444	RPL4	ribosomal protein L4	CHEMBL4297744	ELX-02	FALSE	2	FALSE	Reactome	rRNA processing in the nucleus and cytosol
ENSG00000174444	RPL4	ribosomal protein L4	CHEMBL4297789	MT-3724	FALSE	2	FALSE	Reactome	rRNA processing in the nucleus and cytosol
ENSG00000105372	RPS19	ribosomal protein S19	CHEMBL256997	ATALUREN	TRUE	4	FALSE	Reactome	rRNA processing in the nucleus and cytosol
ENSG00000105372	RPS19	ribosomal protein S19	CHEMBL4297744	ELX-02	FALSE	2	FALSE	Reactome	rRNA processing in the nucleus and cytosol
ENSG00000105372	RPS19	ribosomal protein S19	CHEMBL4297789	MT-3724	FALSE	2	FALSE	Reactome	rRNA processing in the nucleus and cytosol
ENSG00000100316	RPL3	ribosomal protein L3	CHEMBL256997	ATALUREN	TRUE	4	FALSE	Reactome	rRNA processing in the nucleus and cytosol
ENSG00000100316	RPL3	ribosomal protein L3	CHEMBL4297744	ELX-02	FALSE	2	FALSE	Reactome	rRNA processing in the nucleus and cytosol
ENSG00000100316	RPL3	ribosomal protein L3	CHEMBL4297789	MT-3724	FALSE	2	FALSE	Reactome	rRNA processing in the nucleus and cytosol
ENSG00000142541	RPL13A	ribosomal protein L13a	CHEMBL256997	ATALUREN	TRUE	4	FALSE	Reactome	rRNA processing in the nucleus and cytosol
ENSG00000142541	RPL13A	ribosomal protein L13a	CHEMBL4297789	MT-3724	FALSE	2	FALSE	Reactome	rRNA processing in the nucleus and cytosol
ENSG00000142541	RPL13A	ribosomal protein L13a	CHEMBL4297744	ELX-02	FALSE	2	FALSE	Reactome	rRNA processing in the nucleus and cytosol
ENSG00000177954	RPS27	ribosomal protein S27	CHEMBL256997	ATALUREN	TRUE	4	FALSE	Reactome	rRNA processing in the nucleus and cytosol
ENSG00000177954	RPS27	ribosomal protein S27	CHEMBL4297744	ELX-02	FALSE	2	FALSE	Reactome	rRNA processing in the nucleus and cytosol
ENSG00000177954	RPS27	ribosomal protein S27	CHEMBL4297789	MT-3724	FALSE	2	FALSE	Reactome	rRNA processing in the nucleus and cytosol
ENSG00000136942	RPL35	ribosomal protein L35	CHEMBL256997	ATALUREN	TRUE	4	FALSE	Reactome	rRNA processing in the nucleus and cytosol
ENSG00000136942	RPL35	ribosomal protein L35	CHEMBL4297789	MT-3724	FALSE	2	FALSE	Reactome	rRNA processing in the nucleus and cytosol
ENSG00000136942	RPL35	ribosomal protein L35	CHEMBL4297744	ELX-02	FALSE	2	FALSE	Reactome	rRNA processing in the nucleus and cytosol
ENSG00000166441	RPL27A	ribosomal protein L27a	CHEMBL256997	ATALUREN	TRUE	4	FALSE	Reactome	rRNA processing in the nucleus and cytosol
ENSG00000166441	RPL27A	ribosomal protein L27a	CHEMBL4297744	ELX-02	FALSE	2	FALSE	Reactome	rRNA processing in the nucleus and cytosol
ENSG00000166441	RPL27A	ribosomal protein L27a	CHEMBL4297789	MT-3724	FALSE	2	FALSE	Reactome	rRNA processing in the nucleus and cytosol
ENSG00000122406	RPL5	ribosomal protein L5	CHEMBL256997	ATALUREN	TRUE	4	FALSE	Reactome	rRNA processing in the nucleus and cytosol
ENSG00000122406	RPL5	ribosomal protein L5	CHEMBL4297744	ELX-02	FALSE	2	FALSE	Reactome	rRNA processing in the nucleus and cytosol
ENSG00000122406	RPL5	ribosomal protein L5	CHEMBL4297789	MT-3724	FALSE	2	FALSE	Reactome	rRNA processing in the nucleus and cytosol
ENSG00000122026	RPL21	ribosomal protein L21	CHEMBL256997	ATALUREN	TRUE	4	FALSE	Reactome	rRNA processing in the nucleus and cytosol
ENSG00000122026	RPL21	ribosomal protein L21	CHEMBL4297744	ELX-02	FALSE	2	FALSE	Reactome	rRNA processing in the nucleus and cytosol
ENSG00000122026	RPL21	ribosomal protein L21	CHEMBL4297789	MT-3724	FALSE	2	FALSE	Reactome	rRNA processing in the nucleus and cytosol
ENSG00000108107	RPL28	ribosomal protein L28	CHEMBL256997	ATALUREN	TRUE	4	FALSE	Reactome	rRNA processing in the nucleus and cytosol
ENSG00000108107	RPL28	ribosomal protein L28	CHEMBL4297744	ELX-02	FALSE	2	FALSE	Reactome	rRNA processing in the nucleus and cytosol
ENSG00000108107	RPL28	ribosomal protein L28	CHEMBL4297789	MT-3724	FALSE	2	FALSE	Reactome	rRNA processing in the nucleus and cytosol
ENSG00000083845	RPS5	ribosomal protein S5	CHEMBL256997	ATALUREN	TRUE	4	FALSE	Reactome	rRNA processing in the nucleus and cytosol
ENSG00000083845	RPS5	ribosomal protein S5	CHEMBL4297744	ELX-02	FALSE	2	FALSE	Reactome	rRNA processing in the nucleus and cytosol
ENSG00000083845	RPS5	ribosomal protein S5	CHEMBL4297789	MT-3724	FALSE	2	FALSE	Reactome	rRNA processing in the nucleus and cytosol
ENSG00000124614	RPS10	ribosomal protein S10	CHEMBL256997	ATALUREN	TRUE	4	FALSE	Reactome	rRNA processing in the nucleus and cytosol
ENSG00000124614	RPS10	ribosomal protein S10	CHEMBL4297744	ELX-02	FALSE	2	FALSE	Reactome	rRNA processing in the nucleus and cytosol
ENSG00000124614	RPS10	ribosomal protein S10	CHEMBL4297789	MT-3724	FALSE	2	FALSE	Reactome	rRNA processing in the nucleus and cytosol
ENSG00000162244	RPL29	ribosomal protein L29	CHEMBL256997	ATALUREN	TRUE	4	FALSE	Reactome	rRNA processing in the nucleus and cytosol
ENSG00000162244	RPL29	ribosomal protein L29	CHEMBL4297789	MT-3724	FALSE	2	FALSE	Reactome	rRNA processing in the nucleus and cytosol
ENSG00000162244	RPL29	ribosomal protein L29	CHEMBL4297744	ELX-02	FALSE	2	FALSE	Reactome	rRNA processing in the nucleus and cytosol
ENSG00000109475	RPL34	ribosomal protein L34	CHEMBL256997	ATALUREN	TRUE	4	FALSE	Reactome	rRNA processing in the nucleus and cytosol
ENSG00000109475	RPL34	ribosomal protein L34	CHEMBL4297789	MT-3724	FALSE	2	FALSE	Reactome	rRNA processing in the nucleus and cytosol
ENSG00000109475	RPL34	ribosomal protein L34	CHEMBL4297744	ELX-02	FALSE	2	FALSE	Reactome	rRNA processing in the nucleus and cytosol
ENSG00000213923	CSNK1E	casein kinase 1 epsilon	CHEMBL3989869	UMBRALISIB TOSYLATE	TRUE	4	FALSE	Reactome	rRNA processing in the nucleus and cytosol
ENSG00000213923	CSNK1E	casein kinase 1 epsilon	CHEMBL3948730	UMBRALISIB	TRUE	4	FALSE	Reactome	rRNA processing in the nucleus and cytosol
ENSG00000188846	RPL14	ribosomal protein L14	CHEMBL256997	ATALUREN	TRUE	4	FALSE	Reactome	rRNA processing in the nucleus and cytosol
ENSG00000188846	RPL14	ribosomal protein L14	CHEMBL4297744	ELX-02	FALSE	2	FALSE	Reactome	rRNA processing in the nucleus and cytosol
ENSG00000188846	RPL14	ribosomal protein L14	CHEMBL4297789	MT-3724	FALSE	2	FALSE	Reactome	rRNA processing in the nucleus and cytosol
ENSG00000008988	RPS20	ribosomal protein S20	CHEMBL256997	ATALUREN	TRUE	4	FALSE	Reactome	rRNA processing in the nucleus and cytosol
ENSG00000008988	RPS20	ribosomal protein S20	CHEMBL4297744	ELX-02	FALSE	2	FALSE	Reactome	rRNA processing in the nucleus and cytosol
ENSG00000008988	RPS20	ribosomal protein S20	CHEMBL4297789	MT-3724	FALSE	2	FALSE	Reactome	rRNA processing in the nucleus and cytosol
ENSG00000145425	RPS3A	ribosomal protein S3A	CHEMBL256997	ATALUREN	TRUE	4	FALSE	Reactome	rRNA processing in the nucleus and cytosol
ENSG00000145425	RPS3A	ribosomal protein S3A	CHEMBL4297744	ELX-02	FALSE	2	FALSE	Reactome	rRNA processing in the nucleus and cytosol
ENSG00000145425	RPS3A	ribosomal protein S3A	CHEMBL4297789	MT-3724	FALSE	2	FALSE	Reactome	rRNA processing in the nucleus and cytosol
ENSG00000161970	RPL26	ribosomal protein L26	CHEMBL256997	ATALUREN	TRUE	4	FALSE	Reactome	rRNA processing in the nucleus and cytosol
ENSG00000161970	RPL26	ribosomal protein L26	CHEMBL4297789	MT-3724	FALSE	2	FALSE	Reactome	rRNA processing in the nucleus and cytosol
ENSG00000161970	RPL26	ribosomal protein L26	CHEMBL4297744	ELX-02	FALSE	2	FALSE	Reactome	rRNA processing in the nucleus and cytosol
ENSG00000174748	RPL15	ribosomal protein L15	CHEMBL256997	ATALUREN	TRUE	4	FALSE	Reactome	rRNA processing in the nucleus and cytosol
ENSG00000174748	RPL15	ribosomal protein L15	CHEMBL4297789	MT-3724	FALSE	2	FALSE	Reactome	rRNA processing in the nucleus and cytosol
ENSG00000174748	RPL15	ribosomal protein L15	CHEMBL4297744	ELX-02	FALSE	2	FALSE	Reactome	rRNA processing in the nucleus and cytosol
ENSG00000131469	RPL27	ribosomal protein L27	CHEMBL256997	ATALUREN	TRUE	4	FALSE	Reactome	rRNA processing in the nucleus and cytosol
ENSG00000131469	RPL27	ribosomal protein L27	CHEMBL4297744	ELX-02	FALSE	2	FALSE	Reactome	rRNA processing in the nucleus and cytosol
ENSG00000131469	RPL27	ribosomal protein L27	CHEMBL4297789	MT-3724	FALSE	2	FALSE	Reactome	rRNA processing in the nucleus and cytosol
ENSG00000197756	RPL37A	ribosomal protein L37a	CHEMBL256997	ATALUREN	TRUE	4	FALSE	Reactome	rRNA processing in the nucleus and cytosol
ENSG00000197756	RPL37A	ribosomal protein L37a	CHEMBL4297744	ELX-02	FALSE	2	FALSE	Reactome	rRNA processing in the nucleus and cytosol
ENSG00000197756	RPL37A	ribosomal protein L37a	CHEMBL4297789	MT-3724	FALSE	2	FALSE	Reactome	rRNA processing in the nucleus and cytosol
ENSG00000145592	RPL37	ribosomal protein L37	CHEMBL256997	ATALUREN	TRUE	4	FALSE	Reactome	rRNA processing in the nucleus and cytosol
ENSG00000145592	RPL37	ribosomal protein L37	CHEMBL4297744	ELX-02	FALSE	2	FALSE	Reactome	rRNA processing in the nucleus and cytosol
ENSG00000145592	RPL37	ribosomal protein L37	CHEMBL4297789	MT-3724	FALSE	2	FALSE	Reactome	rRNA processing in the nucleus and cytosol
ENSG00000171863	RPS7	ribosomal protein S7	CHEMBL256997	ATALUREN	TRUE	4	FALSE	Reactome	rRNA processing in the nucleus and cytosol
ENSG00000171863	RPS7	ribosomal protein S7	CHEMBL4297789	MT-3724	FALSE	2	FALSE	Reactome	rRNA processing in the nucleus and cytosol
ENSG00000171863	RPS7	ribosomal protein S7	CHEMBL4297744	ELX-02	FALSE	2	FALSE	Reactome	rRNA processing in the nucleus and cytosol
ENSG00000142937	RPS8	ribosomal protein S8	CHEMBL256997	ATALUREN	TRUE	4	FALSE	Reactome	rRNA processing in the nucleus and cytosol
ENSG00000142937	RPS8	ribosomal protein S8	CHEMBL4297789	MT-3724	FALSE	2	FALSE	Reactome	rRNA processing in the nucleus and cytosol
ENSG00000142937	RPS8	ribosomal protein S8	CHEMBL4297744	ELX-02	FALSE	2	FALSE	Reactome	rRNA processing in the nucleus and cytosol
ENSG00000134419	RPS15A	ribosomal protein S15a	CHEMBL256997	ATALUREN	TRUE	4	FALSE	Reactome	rRNA processing in the nucleus and cytosol
ENSG00000134419	RPS15A	ribosomal protein S15a	CHEMBL4297744	ELX-02	FALSE	2	FALSE	Reactome	rRNA processing in the nucleus and cytosol
ENSG00000134419	RPS15A	ribosomal protein S15a	CHEMBL4297789	MT-3724	FALSE	2	FALSE	Reactome	rRNA processing in the nucleus and cytosol
ENSG00000105193	RPS16	ribosomal protein S16	CHEMBL256997	ATALUREN	TRUE	4	FALSE	Reactome	rRNA processing in the nucleus and cytosol
ENSG00000105193	RPS16	ribosomal protein S16	CHEMBL4297789	MT-3724	FALSE	2	FALSE	Reactome	rRNA processing in the nucleus and cytosol
ENSG00000105193	RPS16	ribosomal protein S16	CHEMBL4297744	ELX-02	FALSE	2	FALSE	Reactome	rRNA processing in the nucleus and cytosol
ENSG00000164587	RPS14	ribosomal protein S14	CHEMBL256997	ATALUREN	TRUE	4	FALSE	Reactome	rRNA processing in the nucleus and cytosol
ENSG00000164587	RPS14	ribosomal protein S14	CHEMBL4297789	MT-3724	FALSE	2	FALSE	Reactome	rRNA processing in the nucleus and cytosol
ENSG00000164587	RPS14	ribosomal protein S14	CHEMBL4297744	ELX-02	FALSE	2	FALSE	Reactome	rRNA processing in the nucleus and cytosol
ENSG00000186468	RPS23	ribosomal protein S23	CHEMBL256997	ATALUREN	TRUE	4	FALSE	Reactome	rRNA processing in the nucleus and cytosol
ENSG00000186468	RPS23	ribosomal protein S23	CHEMBL4297744	ELX-02	FALSE	2	FALSE	Reactome	rRNA processing in the nucleus and cytosol
ENSG00000186468	RPS23	ribosomal protein S23	CHEMBL4297789	MT-3724	FALSE	2	FALSE	Reactome	rRNA processing in the nucleus and cytosol
ENSG00000213741	RPS29	ribosomal protein S29	CHEMBL256997	ATALUREN	TRUE	4	FALSE	Reactome	rRNA processing in the nucleus and cytosol
ENSG00000213741	RPS29	ribosomal protein S29	CHEMBL4297744	ELX-02	FALSE	2	FALSE	Reactome	rRNA processing in the nucleus and cytosol
ENSG00000213741	RPS29	ribosomal protein S29	CHEMBL4297789	MT-3724	FALSE	2	FALSE	Reactome	rRNA processing in the nucleus and cytosol
ENSG00000110700	RPS13	ribosomal protein S13	CHEMBL256997	ATALUREN	TRUE	4	FALSE	Reactome	rRNA processing in the nucleus and cytosol
ENSG00000110700	RPS13	ribosomal protein S13	CHEMBL4297744	ELX-02	FALSE	2	FALSE	Reactome	rRNA processing in the nucleus and cytosol
ENSG00000110700	RPS13	ribosomal protein S13	CHEMBL4297789	MT-3724	FALSE	2	FALSE	Reactome	rRNA processing in the nucleus and cytosol
ENSG00000142534	RPS11	ribosomal protein S11	CHEMBL256997	ATALUREN	TRUE	4	FALSE	Reactome	rRNA processing in the nucleus and cytosol
ENSG00000142534	RPS11	ribosomal protein S11	CHEMBL4297744	ELX-02	FALSE	2	FALSE	Reactome	rRNA processing in the nucleus and cytosol
ENSG00000142534	RPS11	ribosomal protein S11	CHEMBL4297789	MT-3724	FALSE	2	FALSE	Reactome	rRNA processing in the nucleus and cytosol
ENSG00000198034	RPS4X	ribosomal protein S4 X-linked	CHEMBL256997	ATALUREN	TRUE	4	FALSE	Reactome	rRNA processing in the nucleus and cytosol
ENSG00000198034	RPS4X	ribosomal protein S4 X-linked	CHEMBL4297744	ELX-02	FALSE	2	FALSE	Reactome	rRNA processing in the nucleus and cytosol
ENSG00000198034	RPS4X	ribosomal protein S4 X-linked	CHEMBL4297789	MT-3724	FALSE	2	FALSE	Reactome	rRNA processing in the nucleus and cytosol
ENSG00000198242	RPL23A	ribosomal protein L23a	CHEMBL256997	ATALUREN	TRUE	4	FALSE	Reactome	rRNA processing in the nucleus and cytosol
ENSG00000198242	RPL23A	ribosomal protein L23a	CHEMBL4297744	ELX-02	FALSE	2	FALSE	Reactome	rRNA processing in the nucleus and cytosol
ENSG00000198242	RPL23A	ribosomal protein L23a	CHEMBL4297789	MT-3724	FALSE	2	FALSE	Reactome	rRNA processing in the nucleus and cytosol
ENSG00000137154	RPS6	ribosomal protein S6	CHEMBL256997	ATALUREN	TRUE	4	FALSE	Reactome	rRNA processing in the nucleus and cytosol
ENSG00000137154	RPS6	ribosomal protein S6	CHEMBL4297744	ELX-02	FALSE	2	FALSE	Reactome	rRNA processing in the nucleus and cytosol
ENSG00000137154	RPS6	ribosomal protein S6	CHEMBL4297789	MT-3724	FALSE	2	FALSE	Reactome	rRNA processing in the nucleus and cytosol
ENSG00000125691	RPL23	ribosomal protein L23	CHEMBL256997	ATALUREN	TRUE	4	FALSE	Reactome	rRNA processing in the nucleus and cytosol
ENSG00000125691	RPL23	ribosomal protein L23	CHEMBL4297789	MT-3724	FALSE	2	FALSE	Reactome	rRNA processing in the nucleus and cytosol
ENSG00000125691	RPL23	ribosomal protein L23	CHEMBL4297744	ELX-02	FALSE	2	FALSE	Reactome	rRNA processing in the nucleus and cytosol
ENSG00000115268	RPS15	ribosomal protein S15	CHEMBL256997	ATALUREN	TRUE	4	FALSE	Reactome	rRNA processing in the nucleus and cytosol
ENSG00000115268	RPS15	ribosomal protein S15	CHEMBL4297744	ELX-02	FALSE	2	FALSE	Reactome	rRNA processing in the nucleus and cytosol
ENSG00000115268	RPS15	ribosomal protein S15	CHEMBL4297789	MT-3724	FALSE	2	FALSE	Reactome	rRNA processing in the nucleus and cytosol
ENSG00000138326	RPS24	ribosomal protein S24	CHEMBL256997	ATALUREN	TRUE	4	FALSE	Reactome	rRNA processing in the nucleus and cytosol
ENSG00000138326	RPS24	ribosomal protein S24	CHEMBL4297789	MT-3724	FALSE	2	FALSE	Reactome	rRNA processing in the nucleus and cytosol
ENSG00000138326	RPS24	ribosomal protein S24	CHEMBL4297744	ELX-02	FALSE	2	FALSE	Reactome	rRNA processing in the nucleus and cytosol
ENSG00000197728	RPS26	ribosomal protein S26	CHEMBL256997	ATALUREN	TRUE	4	FALSE	Reactome	rRNA processing in the nucleus and cytosol
ENSG00000197728	RPS26	ribosomal protein S26	CHEMBL4297744	ELX-02	FALSE	2	FALSE	Reactome	rRNA processing in the nucleus and cytosol
ENSG00000197728	RPS26	ribosomal protein S26	CHEMBL4297789	MT-3724	FALSE	2	FALSE	Reactome	rRNA processing in the nucleus and cytosol
ENSG00000233927	RPS28	ribosomal protein S28	CHEMBL256997	ATALUREN	TRUE	4	FALSE	Reactome	rRNA processing in the nucleus and cytosol
ENSG00000233927	RPS28	ribosomal protein S28	CHEMBL4297744	ELX-02	FALSE	2	FALSE	Reactome	rRNA processing in the nucleus and cytosol
ENSG00000233927	RPS28	ribosomal protein S28	CHEMBL4297789	MT-3724	FALSE	2	FALSE	Reactome	rRNA processing in the nucleus and cytosol
ENSG00000149806	FAU	FAU ubiquitin like and ribosomal protein S30 fusion	CHEMBL256997	ATALUREN	TRUE	4	FALSE	Reactome	rRNA processing in the nucleus and cytosol
ENSG00000149806	FAU	FAU ubiquitin like and ribosomal protein S30 fusion	CHEMBL4297744	ELX-02	FALSE	2	FALSE	Reactome	rRNA processing in the nucleus and cytosol
ENSG00000149806	FAU	FAU ubiquitin like and ribosomal protein S30 fusion	CHEMBL4297789	MT-3724	FALSE	2	FALSE	Reactome	rRNA processing in the nucleus and cytosol
ENSG00000156482	RPL30	ribosomal protein L30	CHEMBL256997	ATALUREN	TRUE	4	FALSE	Reactome	rRNA processing in the nucleus and cytosol
ENSG00000156482	RPL30	ribosomal protein L30	CHEMBL4297789	MT-3724	FALSE	2	FALSE	Reactome	rRNA processing in the nucleus and cytosol
ENSG00000156482	RPL30	ribosomal protein L30	CHEMBL4297744	ELX-02	FALSE	2	FALSE	Reactome	rRNA processing in the nucleus and cytosol
ENSG00000198918	RPL39	ribosomal protein L39	CHEMBL256997	ATALUREN	TRUE	4	FALSE	Reactome	rRNA processing in the nucleus and cytosol
ENSG00000198918	RPL39	ribosomal protein L39	CHEMBL4297744	ELX-02	FALSE	2	FALSE	Reactome	rRNA processing in the nucleus and cytosol
ENSG00000198918	RPL39	ribosomal protein L39	CHEMBL4297789	MT-3724	FALSE	2	FALSE	Reactome	rRNA processing in the nucleus and cytosol
ENSG00000071082	RPL31	ribosomal protein L31	CHEMBL256997	ATALUREN	TRUE	4	FALSE	Reactome	rRNA processing in the nucleus and cytosol
ENSG00000071082	RPL31	ribosomal protein L31	CHEMBL4297744	ELX-02	FALSE	2	FALSE	Reactome	rRNA processing in the nucleus and cytosol
ENSG00000071082	RPL31	ribosomal protein L31	CHEMBL4297789	MT-3724	FALSE	2	FALSE	Reactome	rRNA processing in the nucleus and cytosol
ENSG00000198755	RPL10A	ribosomal protein L10a	CHEMBL256997	ATALUREN	TRUE	4	FALSE	Reactome	rRNA processing in the nucleus and cytosol
ENSG00000198755	RPL10A	ribosomal protein L10a	CHEMBL4297789	MT-3724	FALSE	2	FALSE	Reactome	rRNA processing in the nucleus and cytosol
ENSG00000198755	RPL10A	ribosomal protein L10a	CHEMBL4297744	ELX-02	FALSE	2	FALSE	Reactome	rRNA processing in the nucleus and cytosol
ENSG00000144713	RPL32	ribosomal protein L32	CHEMBL256997	ATALUREN	TRUE	4	FALSE	Reactome	rRNA processing in the nucleus and cytosol
ENSG00000144713	RPL32	ribosomal protein L32	CHEMBL4297744	ELX-02	FALSE	2	FALSE	Reactome	rRNA processing in the nucleus and cytosol
ENSG00000144713	RPL32	ribosomal protein L32	CHEMBL4297789	MT-3724	FALSE	2	FALSE	Reactome	rRNA processing in the nucleus and cytosol
ENSG00000142676	RPL11	ribosomal protein L11	CHEMBL256997	ATALUREN	TRUE	4	FALSE	Reactome	rRNA processing in the nucleus and cytosol
ENSG00000142676	RPL11	ribosomal protein L11	CHEMBL4297789	MT-3724	FALSE	2	FALSE	Reactome	rRNA processing in the nucleus and cytosol
ENSG00000142676	RPL11	ribosomal protein L11	CHEMBL4297744	ELX-02	FALSE	2	FALSE	Reactome	rRNA processing in the nucleus and cytosol
ENSG00000161016	RPL8	ribosomal protein L8	CHEMBL256997	ATALUREN	TRUE	4	FALSE	Reactome	rRNA processing in the nucleus and cytosol
ENSG00000161016	RPL8	ribosomal protein L8	CHEMBL4297744	ELX-02	FALSE	2	FALSE	Reactome	rRNA processing in the nucleus and cytosol
ENSG00000161016	RPL8	ribosomal protein L8	CHEMBL4297789	MT-3724	FALSE	2	FALSE	Reactome	rRNA processing in the nucleus and cytosol
ENSG00000229117	RPL41	ribosomal protein L41	CHEMBL256997	ATALUREN	TRUE	4	FALSE	Reactome	rRNA processing in the nucleus and cytosol
ENSG00000229117	RPL41	ribosomal protein L41	CHEMBL4297744	ELX-02	FALSE	2	FALSE	Reactome	rRNA processing in the nucleus and cytosol
ENSG00000229117	RPL41	ribosomal protein L41	CHEMBL4297789	MT-3724	FALSE	2	FALSE	Reactome	rRNA processing in the nucleus and cytosol
ENSG00000143947	RPS27A	ribosomal protein S27a	CHEMBL256997	ATALUREN	TRUE	4	FALSE	Reactome	rRNA processing in the nucleus and cytosol
ENSG00000143947	RPS27A	ribosomal protein S27a	CHEMBL4297744	ELX-02	FALSE	2	FALSE	Reactome	rRNA processing in the nucleus and cytosol
ENSG00000143947	RPS27A	ribosomal protein S27a	CHEMBL4297789	MT-3724	FALSE	2	FALSE	Reactome	rRNA processing in the nucleus and cytosol
ENSG00000172809	RPL38	ribosomal protein L38	CHEMBL256997	ATALUREN	TRUE	4	FALSE	Reactome	rRNA processing in the nucleus and cytosol
ENSG00000172809	RPL38	ribosomal protein L38	CHEMBL4297744	ELX-02	FALSE	2	FALSE	Reactome	rRNA processing in the nucleus and cytosol
ENSG00000172809	RPL38	ribosomal protein L38	CHEMBL4297789	MT-3724	FALSE	2	FALSE	Reactome	rRNA processing in the nucleus and cytosol
ENSG00000171858	RPS21	ribosomal protein S21	CHEMBL256997	ATALUREN	TRUE	4	FALSE	Reactome	rRNA processing in the nucleus and cytosol
ENSG00000171858	RPS21	ribosomal protein S21	CHEMBL4297744	ELX-02	FALSE	2	FALSE	Reactome	rRNA processing in the nucleus and cytosol
ENSG00000171858	RPS21	ribosomal protein S21	CHEMBL4297789	MT-3724	FALSE	2	FALSE	Reactome	rRNA processing in the nucleus and cytosol
ENSG00000114391	RPL24	ribosomal protein L24	CHEMBL256997	ATALUREN	TRUE	4	FALSE	Reactome	rRNA processing in the nucleus and cytosol
ENSG00000114391	RPL24	ribosomal protein L24	CHEMBL4297744	ELX-02	FALSE	2	FALSE	Reactome	rRNA processing in the nucleus and cytosol
ENSG00000114391	RPL24	ribosomal protein L24	CHEMBL4297789	MT-3724	FALSE	2	FALSE	Reactome	rRNA processing in the nucleus and cytosol
ENSG00000241343	RPL36A	ribosomal protein L36a	CHEMBL256997	ATALUREN	TRUE	4	FALSE	Reactome	rRNA processing in the nucleus and cytosol
ENSG00000241343	RPL36A	ribosomal protein L36a	CHEMBL4297744	ELX-02	FALSE	2	FALSE	Reactome	rRNA processing in the nucleus and cytosol
ENSG00000241343	RPL36A	ribosomal protein L36a	CHEMBL4297789	MT-3724	FALSE	2	FALSE	Reactome	rRNA processing in the nucleus and cytosol
ENSG00000108298	RPL19	ribosomal protein L19	CHEMBL256997	ATALUREN	TRUE	4	FALSE	Reactome	rRNA processing in the nucleus and cytosol
ENSG00000108298	RPL19	ribosomal protein L19	CHEMBL4297744	ELX-02	FALSE	2	FALSE	Reactome	rRNA processing in the nucleus and cytosol
ENSG00000108298	RPL19	ribosomal protein L19	CHEMBL4297789	MT-3724	FALSE	2	FALSE	Reactome	rRNA processing in the nucleus and cytosol
ENSG00000105640	RPL18A	ribosomal protein L18a	CHEMBL256997	ATALUREN	TRUE	4	FALSE	Reactome	rRNA processing in the nucleus and cytosol
ENSG00000105640	RPL18A	ribosomal protein L18a	CHEMBL4297744	ELX-02	FALSE	2	FALSE	Reactome	rRNA processing in the nucleus and cytosol
ENSG00000105640	RPL18A	ribosomal protein L18a	CHEMBL4297789	MT-3724	FALSE	2	FALSE	Reactome	rRNA processing in the nucleus and cytosol
ENSG00000089009	RPL6	ribosomal protein L6	CHEMBL256997	ATALUREN	TRUE	4	FALSE	Reactome	rRNA processing in the nucleus and cytosol
ENSG00000089009	RPL6	ribosomal protein L6	CHEMBL4297744	ELX-02	FALSE	2	FALSE	Reactome	rRNA processing in the nucleus and cytosol
ENSG00000089009	RPL6	ribosomal protein L6	CHEMBL4297789	MT-3724	FALSE	2	FALSE	Reactome	rRNA processing in the nucleus and cytosol
ENSG00000063177	RPL18	ribosomal protein L18	CHEMBL256997	ATALUREN	TRUE	4	FALSE	Reactome	rRNA processing in the nucleus and cytosol
ENSG00000063177	RPL18	ribosomal protein L18	CHEMBL4297744	ELX-02	FALSE	2	FALSE	Reactome	rRNA processing in the nucleus and cytosol
ENSG00000063177	RPL18	ribosomal protein L18	CHEMBL4297789	MT-3724	FALSE	2	FALSE	Reactome	rRNA processing in the nucleus and cytosol
ENSG00000130255	RPL36	ribosomal protein L36	CHEMBL256997	ATALUREN	TRUE	4	FALSE	Reactome	rRNA processing in the nucleus and cytosol
ENSG00000130255	RPL36	ribosomal protein L36	CHEMBL4297744	ELX-02	FALSE	2	FALSE	Reactome	rRNA processing in the nucleus and cytosol
ENSG00000130255	RPL36	ribosomal protein L36	CHEMBL4297789	MT-3724	FALSE	2	FALSE	Reactome	rRNA processing in the nucleus and cytosol
ENSG00000137818	RPLP1	ribosomal protein lateral stalk subunit P1	CHEMBL256997	ATALUREN	TRUE	4	FALSE	Reactome	rRNA processing
ENSG00000137818	RPLP1	ribosomal protein lateral stalk subunit P1	CHEMBL4297789	MT-3724	FALSE	2	FALSE	Reactome	rRNA processing
ENSG00000137818	RPLP1	ribosomal protein lateral stalk subunit P1	CHEMBL4297744	ELX-02	FALSE	2	FALSE	Reactome	rRNA processing
ENSG00000089157	RPLP0	ribosomal protein lateral stalk subunit P0	CHEMBL256997	ATALUREN	TRUE	4	FALSE	Reactome	rRNA processing
ENSG00000089157	RPLP0	ribosomal protein lateral stalk subunit P0	CHEMBL4297789	MT-3724	FALSE	2	FALSE	Reactome	rRNA processing
ENSG00000089157	RPLP0	ribosomal protein lateral stalk subunit P0	CHEMBL4297744	ELX-02	FALSE	2	FALSE	Reactome	rRNA processing
ENSG00000168028	RPSA	ribosomal protein SA	CHEMBL256997	ATALUREN	TRUE	4	FALSE	Reactome	rRNA processing
ENSG00000168028	RPSA	ribosomal protein SA	CHEMBL4297744	ELX-02	FALSE	2	FALSE	Reactome	rRNA processing
ENSG00000168028	RPSA	ribosomal protein SA	CHEMBL4297789	MT-3724	FALSE	2	FALSE	Reactome	rRNA processing
ENSG00000140988	RPS2	ribosomal protein S2	CHEMBL256997	ATALUREN	TRUE	4	FALSE	Reactome	rRNA processing
ENSG00000140988	RPS2	ribosomal protein S2	CHEMBL4297744	ELX-02	FALSE	2	FALSE	Reactome	rRNA processing
ENSG00000140988	RPS2	ribosomal protein S2	CHEMBL4297789	MT-3724	FALSE	2	FALSE	Reactome	rRNA processing
ENSG00000182899	RPL35A	ribosomal protein L35a	CHEMBL256997	ATALUREN	TRUE	4	FALSE	Reactome	rRNA processing
ENSG00000182899	RPL35A	ribosomal protein L35a	CHEMBL4297789	MT-3724	FALSE	2	FALSE	Reactome	rRNA processing
ENSG00000182899	RPL35A	ribosomal protein L35a	CHEMBL4297744	ELX-02	FALSE	2	FALSE	Reactome	rRNA processing
ENSG00000147604	RPL7	ribosomal protein L7	CHEMBL256997	ATALUREN	TRUE	4	FALSE	Reactome	rRNA processing
ENSG00000147604	RPL7	ribosomal protein L7	CHEMBL4297744	ELX-02	FALSE	2	FALSE	Reactome	rRNA processing
ENSG00000147604	RPL7	ribosomal protein L7	CHEMBL4297789	MT-3724	FALSE	2	FALSE	Reactome	rRNA processing
ENSG00000265681	RPL17	ribosomal protein L17	CHEMBL256997	ATALUREN	TRUE	4	FALSE	Reactome	rRNA processing
ENSG00000265681	RPL17	ribosomal protein L17	CHEMBL4297744	ELX-02	FALSE	2	FALSE	Reactome	rRNA processing
ENSG00000265681	RPL17	ribosomal protein L17	CHEMBL4297789	MT-3724	FALSE	2	FALSE	Reactome	rRNA processing
ENSG00000129824	RPS4Y1	ribosomal protein S4 Y-linked 1	CHEMBL256997	ATALUREN	TRUE	4	FALSE	Reactome	rRNA processing
ENSG00000129824	RPS4Y1	ribosomal protein S4 Y-linked 1	CHEMBL4297744	ELX-02	FALSE	2	FALSE	Reactome	rRNA processing
ENSG00000129824	RPS4Y1	ribosomal protein S4 Y-linked 1	CHEMBL4297789	MT-3724	FALSE	2	FALSE	Reactome	rRNA processing
ENSG00000149273	RPS3	ribosomal protein S3	CHEMBL256997	ATALUREN	TRUE	4	FALSE	Reactome	rRNA processing
ENSG00000149273	RPS3	ribosomal protein S3	CHEMBL4297789	MT-3724	FALSE	2	FALSE	Reactome	rRNA processing
ENSG00000149273	RPS3	ribosomal protein S3	CHEMBL4297744	ELX-02	FALSE	2	FALSE	Reactome	rRNA processing
ENSG00000112306	RPS12	ribosomal protein S12	CHEMBL256997	ATALUREN	TRUE	4	FALSE	Reactome	rRNA processing
ENSG00000112306	RPS12	ribosomal protein S12	CHEMBL4297744	ELX-02	FALSE	2	FALSE	Reactome	rRNA processing
ENSG00000112306	RPS12	ribosomal protein S12	CHEMBL4297789	MT-3724	FALSE	2	FALSE	Reactome	rRNA processing
ENSG00000167526	RPL13	ribosomal protein L13	CHEMBL256997	ATALUREN	TRUE	4	FALSE	Reactome	rRNA processing
ENSG00000167526	RPL13	ribosomal protein L13	CHEMBL4297789	MT-3724	FALSE	2	FALSE	Reactome	rRNA processing
ENSG00000167526	RPL13	ribosomal protein L13	CHEMBL4297744	ELX-02	FALSE	2	FALSE	Reactome	rRNA processing
ENSG00000147403	RPL10	ribosomal protein L10	CHEMBL256997	ATALUREN	TRUE	4	FALSE	Reactome	rRNA processing
ENSG00000147403	RPL10	ribosomal protein L10	CHEMBL4297744	ELX-02	FALSE	2	FALSE	Reactome	rRNA processing
ENSG00000147403	RPL10	ribosomal protein L10	CHEMBL4297789	MT-3724	FALSE	2	FALSE	Reactome	rRNA processing
ENSG00000197958	RPL12	ribosomal protein L12	CHEMBL256997	ATALUREN	TRUE	4	FALSE	Reactome	rRNA processing
ENSG00000197958	RPL12	ribosomal protein L12	CHEMBL4297744	ELX-02	FALSE	2	FALSE	Reactome	rRNA processing
ENSG00000197958	RPL12	ribosomal protein L12	CHEMBL4297789	MT-3724	FALSE	2	FALSE	Reactome	rRNA processing
ENSG00000163682	RPL9	ribosomal protein L9	CHEMBL256997	ATALUREN	TRUE	4	FALSE	Reactome	rRNA processing
ENSG00000163682	RPL9	ribosomal protein L9	CHEMBL4297744	ELX-02	FALSE	2	FALSE	Reactome	rRNA processing
ENSG00000163682	RPL9	ribosomal protein L9	CHEMBL4297789	MT-3724	FALSE	2	FALSE	Reactome	rRNA processing
ENSG00000116251	RPL22	ribosomal protein L22	CHEMBL256997	ATALUREN	TRUE	4	FALSE	Reactome	rRNA processing
ENSG00000116251	RPL22	ribosomal protein L22	CHEMBL4297789	MT-3724	FALSE	2	FALSE	Reactome	rRNA processing
ENSG00000116251	RPL22	ribosomal protein L22	CHEMBL4297744	ELX-02	FALSE	2	FALSE	Reactome	rRNA processing
ENSG00000174444	RPL4	ribosomal protein L4	CHEMBL256997	ATALUREN	TRUE	4	FALSE	Reactome	rRNA processing
ENSG00000174444	RPL4	ribosomal protein L4	CHEMBL4297744	ELX-02	FALSE	2	FALSE	Reactome	rRNA processing
ENSG00000174444	RPL4	ribosomal protein L4	CHEMBL4297789	MT-3724	FALSE	2	FALSE	Reactome	rRNA processing
ENSG00000105372	RPS19	ribosomal protein S19	CHEMBL256997	ATALUREN	TRUE	4	FALSE	Reactome	rRNA processing
ENSG00000105372	RPS19	ribosomal protein S19	CHEMBL4297744	ELX-02	FALSE	2	FALSE	Reactome	rRNA processing
ENSG00000105372	RPS19	ribosomal protein S19	CHEMBL4297789	MT-3724	FALSE	2	FALSE	Reactome	rRNA processing
ENSG00000100316	RPL3	ribosomal protein L3	CHEMBL256997	ATALUREN	TRUE	4	FALSE	Reactome	rRNA processing
ENSG00000100316	RPL3	ribosomal protein L3	CHEMBL4297744	ELX-02	FALSE	2	FALSE	Reactome	rRNA processing
ENSG00000100316	RPL3	ribosomal protein L3	CHEMBL4297789	MT-3724	FALSE	2	FALSE	Reactome	rRNA processing
ENSG00000142541	RPL13A	ribosomal protein L13a	CHEMBL256997	ATALUREN	TRUE	4	FALSE	Reactome	rRNA processing
ENSG00000142541	RPL13A	ribosomal protein L13a	CHEMBL4297789	MT-3724	FALSE	2	FALSE	Reactome	rRNA processing
ENSG00000142541	RPL13A	ribosomal protein L13a	CHEMBL4297744	ELX-02	FALSE	2	FALSE	Reactome	rRNA processing
ENSG00000177954	RPS27	ribosomal protein S27	CHEMBL256997	ATALUREN	TRUE	4	FALSE	Reactome	rRNA processing
ENSG00000177954	RPS27	ribosomal protein S27	CHEMBL4297744	ELX-02	FALSE	2	FALSE	Reactome	rRNA processing
ENSG00000177954	RPS27	ribosomal protein S27	CHEMBL4297789	MT-3724	FALSE	2	FALSE	Reactome	rRNA processing
ENSG00000136942	RPL35	ribosomal protein L35	CHEMBL256997	ATALUREN	TRUE	4	FALSE	Reactome	rRNA processing
ENSG00000136942	RPL35	ribosomal protein L35	CHEMBL4297789	MT-3724	FALSE	2	FALSE	Reactome	rRNA processing
ENSG00000136942	RPL35	ribosomal protein L35	CHEMBL4297744	ELX-02	FALSE	2	FALSE	Reactome	rRNA processing
ENSG00000166441	RPL27A	ribosomal protein L27a	CHEMBL256997	ATALUREN	TRUE	4	FALSE	Reactome	rRNA processing
ENSG00000166441	RPL27A	ribosomal protein L27a	CHEMBL4297744	ELX-02	FALSE	2	FALSE	Reactome	rRNA processing
ENSG00000166441	RPL27A	ribosomal protein L27a	CHEMBL4297789	MT-3724	FALSE	2	FALSE	Reactome	rRNA processing
ENSG00000122406	RPL5	ribosomal protein L5	CHEMBL256997	ATALUREN	TRUE	4	FALSE	Reactome	rRNA processing
ENSG00000122406	RPL5	ribosomal protein L5	CHEMBL4297744	ELX-02	FALSE	2	FALSE	Reactome	rRNA processing
ENSG00000122406	RPL5	ribosomal protein L5	CHEMBL4297789	MT-3724	FALSE	2	FALSE	Reactome	rRNA processing
ENSG00000122026	RPL21	ribosomal protein L21	CHEMBL256997	ATALUREN	TRUE	4	FALSE	Reactome	rRNA processing
ENSG00000122026	RPL21	ribosomal protein L21	CHEMBL4297744	ELX-02	FALSE	2	FALSE	Reactome	rRNA processing
ENSG00000122026	RPL21	ribosomal protein L21	CHEMBL4297789	MT-3724	FALSE	2	FALSE	Reactome	rRNA processing
ENSG00000108107	RPL28	ribosomal protein L28	CHEMBL256997	ATALUREN	TRUE	4	FALSE	Reactome	rRNA processing
ENSG00000108107	RPL28	ribosomal protein L28	CHEMBL4297744	ELX-02	FALSE	2	FALSE	Reactome	rRNA processing
ENSG00000108107	RPL28	ribosomal protein L28	CHEMBL4297789	MT-3724	FALSE	2	FALSE	Reactome	rRNA processing
ENSG00000083845	RPS5	ribosomal protein S5	CHEMBL256997	ATALUREN	TRUE	4	FALSE	Reactome	rRNA processing
ENSG00000083845	RPS5	ribosomal protein S5	CHEMBL4297744	ELX-02	FALSE	2	FALSE	Reactome	rRNA processing
ENSG00000083845	RPS5	ribosomal protein S5	CHEMBL4297789	MT-3724	FALSE	2	FALSE	Reactome	rRNA processing
ENSG00000124614	RPS10	ribosomal protein S10	CHEMBL256997	ATALUREN	TRUE	4	FALSE	Reactome	rRNA processing
ENSG00000124614	RPS10	ribosomal protein S10	CHEMBL4297744	ELX-02	FALSE	2	FALSE	Reactome	rRNA processing
ENSG00000124614	RPS10	ribosomal protein S10	CHEMBL4297789	MT-3724	FALSE	2	FALSE	Reactome	rRNA processing
ENSG00000162244	RPL29	ribosomal protein L29	CHEMBL256997	ATALUREN	TRUE	4	FALSE	Reactome	rRNA processing
ENSG00000162244	RPL29	ribosomal protein L29	CHEMBL4297789	MT-3724	FALSE	2	FALSE	Reactome	rRNA processing
ENSG00000162244	RPL29	ribosomal protein L29	CHEMBL4297744	ELX-02	FALSE	2	FALSE	Reactome	rRNA processing
ENSG00000109475	RPL34	ribosomal protein L34	CHEMBL256997	ATALUREN	TRUE	4	FALSE	Reactome	rRNA processing
ENSG00000109475	RPL34	ribosomal protein L34	CHEMBL4297789	MT-3724	FALSE	2	FALSE	Reactome	rRNA processing
ENSG00000109475	RPL34	ribosomal protein L34	CHEMBL4297744	ELX-02	FALSE	2	FALSE	Reactome	rRNA processing
ENSG00000213923	CSNK1E	casein kinase 1 epsilon	CHEMBL3989869	UMBRALISIB TOSYLATE	TRUE	4	FALSE	Reactome	rRNA processing
ENSG00000213923	CSNK1E	casein kinase 1 epsilon	CHEMBL3948730	UMBRALISIB	TRUE	4	FALSE	Reactome	rRNA processing
ENSG00000188846	RPL14	ribosomal protein L14	CHEMBL256997	ATALUREN	TRUE	4	FALSE	Reactome	rRNA processing
ENSG00000188846	RPL14	ribosomal protein L14	CHEMBL4297744	ELX-02	FALSE	2	FALSE	Reactome	rRNA processing
ENSG00000188846	RPL14	ribosomal protein L14	CHEMBL4297789	MT-3724	FALSE	2	FALSE	Reactome	rRNA processing
ENSG00000008988	RPS20	ribosomal protein S20	CHEMBL256997	ATALUREN	TRUE	4	FALSE	Reactome	rRNA processing
ENSG00000008988	RPS20	ribosomal protein S20	CHEMBL4297744	ELX-02	FALSE	2	FALSE	Reactome	rRNA processing
ENSG00000008988	RPS20	ribosomal protein S20	CHEMBL4297789	MT-3724	FALSE	2	FALSE	Reactome	rRNA processing
ENSG00000145425	RPS3A	ribosomal protein S3A	CHEMBL256997	ATALUREN	TRUE	4	FALSE	Reactome	rRNA processing
ENSG00000145425	RPS3A	ribosomal protein S3A	CHEMBL4297744	ELX-02	FALSE	2	FALSE	Reactome	rRNA processing
ENSG00000145425	RPS3A	ribosomal protein S3A	CHEMBL4297789	MT-3724	FALSE	2	FALSE	Reactome	rRNA processing
ENSG00000161970	RPL26	ribosomal protein L26	CHEMBL256997	ATALUREN	TRUE	4	FALSE	Reactome	rRNA processing
ENSG00000161970	RPL26	ribosomal protein L26	CHEMBL4297789	MT-3724	FALSE	2	FALSE	Reactome	rRNA processing
ENSG00000161970	RPL26	ribosomal protein L26	CHEMBL4297744	ELX-02	FALSE	2	FALSE	Reactome	rRNA processing
ENSG00000174748	RPL15	ribosomal protein L15	CHEMBL256997	ATALUREN	TRUE	4	FALSE	Reactome	rRNA processing
ENSG00000174748	RPL15	ribosomal protein L15	CHEMBL4297789	MT-3724	FALSE	2	FALSE	Reactome	rRNA processing
ENSG00000174748	RPL15	ribosomal protein L15	CHEMBL4297744	ELX-02	FALSE	2	FALSE	Reactome	rRNA processing
ENSG00000131469	RPL27	ribosomal protein L27	CHEMBL256997	ATALUREN	TRUE	4	FALSE	Reactome	rRNA processing
ENSG00000131469	RPL27	ribosomal protein L27	CHEMBL4297744	ELX-02	FALSE	2	FALSE	Reactome	rRNA processing
ENSG00000131469	RPL27	ribosomal protein L27	CHEMBL4297789	MT-3724	FALSE	2	FALSE	Reactome	rRNA processing
ENSG00000197756	RPL37A	ribosomal protein L37a	CHEMBL256997	ATALUREN	TRUE	4	FALSE	Reactome	rRNA processing
ENSG00000197756	RPL37A	ribosomal protein L37a	CHEMBL4297744	ELX-02	FALSE	2	FALSE	Reactome	rRNA processing
ENSG00000197756	RPL37A	ribosomal protein L37a	CHEMBL4297789	MT-3724	FALSE	2	FALSE	Reactome	rRNA processing
ENSG00000145592	RPL37	ribosomal protein L37	CHEMBL256997	ATALUREN	TRUE	4	FALSE	Reactome	rRNA processing
ENSG00000145592	RPL37	ribosomal protein L37	CHEMBL4297744	ELX-02	FALSE	2	FALSE	Reactome	rRNA processing
ENSG00000145592	RPL37	ribosomal protein L37	CHEMBL4297789	MT-3724	FALSE	2	FALSE	Reactome	rRNA processing
ENSG00000171863	RPS7	ribosomal protein S7	CHEMBL256997	ATALUREN	TRUE	4	FALSE	Reactome	rRNA processing
ENSG00000171863	RPS7	ribosomal protein S7	CHEMBL4297789	MT-3724	FALSE	2	FALSE	Reactome	rRNA processing
ENSG00000171863	RPS7	ribosomal protein S7	CHEMBL4297744	ELX-02	FALSE	2	FALSE	Reactome	rRNA processing
ENSG00000142937	RPS8	ribosomal protein S8	CHEMBL256997	ATALUREN	TRUE	4	FALSE	Reactome	rRNA processing
ENSG00000142937	RPS8	ribosomal protein S8	CHEMBL4297789	MT-3724	FALSE	2	FALSE	Reactome	rRNA processing
ENSG00000142937	RPS8	ribosomal protein S8	CHEMBL4297744	ELX-02	FALSE	2	FALSE	Reactome	rRNA processing
ENSG00000134419	RPS15A	ribosomal protein S15a	CHEMBL256997	ATALUREN	TRUE	4	FALSE	Reactome	rRNA processing
ENSG00000134419	RPS15A	ribosomal protein S15a	CHEMBL4297744	ELX-02	FALSE	2	FALSE	Reactome	rRNA processing
ENSG00000134419	RPS15A	ribosomal protein S15a	CHEMBL4297789	MT-3724	FALSE	2	FALSE	Reactome	rRNA processing
ENSG00000105193	RPS16	ribosomal protein S16	CHEMBL256997	ATALUREN	TRUE	4	FALSE	Reactome	rRNA processing
ENSG00000105193	RPS16	ribosomal protein S16	CHEMBL4297789	MT-3724	FALSE	2	FALSE	Reactome	rRNA processing
ENSG00000105193	RPS16	ribosomal protein S16	CHEMBL4297744	ELX-02	FALSE	2	FALSE	Reactome	rRNA processing
ENSG00000164587	RPS14	ribosomal protein S14	CHEMBL256997	ATALUREN	TRUE	4	FALSE	Reactome	rRNA processing
ENSG00000164587	RPS14	ribosomal protein S14	CHEMBL4297789	MT-3724	FALSE	2	FALSE	Reactome	rRNA processing
ENSG00000164587	RPS14	ribosomal protein S14	CHEMBL4297744	ELX-02	FALSE	2	FALSE	Reactome	rRNA processing
ENSG00000186468	RPS23	ribosomal protein S23	CHEMBL256997	ATALUREN	TRUE	4	FALSE	Reactome	rRNA processing
ENSG00000186468	RPS23	ribosomal protein S23	CHEMBL4297744	ELX-02	FALSE	2	FALSE	Reactome	rRNA processing
ENSG00000186468	RPS23	ribosomal protein S23	CHEMBL4297789	MT-3724	FALSE	2	FALSE	Reactome	rRNA processing
ENSG00000213741	RPS29	ribosomal protein S29	CHEMBL256997	ATALUREN	TRUE	4	FALSE	Reactome	rRNA processing
ENSG00000213741	RPS29	ribosomal protein S29	CHEMBL4297744	ELX-02	FALSE	2	FALSE	Reactome	rRNA processing
ENSG00000213741	RPS29	ribosomal protein S29	CHEMBL4297789	MT-3724	FALSE	2	FALSE	Reactome	rRNA processing
ENSG00000110700	RPS13	ribosomal protein S13	CHEMBL256997	ATALUREN	TRUE	4	FALSE	Reactome	rRNA processing
ENSG00000110700	RPS13	ribosomal protein S13	CHEMBL4297744	ELX-02	FALSE	2	FALSE	Reactome	rRNA processing
ENSG00000110700	RPS13	ribosomal protein S13	CHEMBL4297789	MT-3724	FALSE	2	FALSE	Reactome	rRNA processing
ENSG00000142534	RPS11	ribosomal protein S11	CHEMBL256997	ATALUREN	TRUE	4	FALSE	Reactome	rRNA processing
ENSG00000142534	RPS11	ribosomal protein S11	CHEMBL4297744	ELX-02	FALSE	2	FALSE	Reactome	rRNA processing
ENSG00000142534	RPS11	ribosomal protein S11	CHEMBL4297789	MT-3724	FALSE	2	FALSE	Reactome	rRNA processing
ENSG00000198034	RPS4X	ribosomal protein S4 X-linked	CHEMBL256997	ATALUREN	TRUE	4	FALSE	Reactome	rRNA processing
ENSG00000198034	RPS4X	ribosomal protein S4 X-linked	CHEMBL4297744	ELX-02	FALSE	2	FALSE	Reactome	rRNA processing
ENSG00000198034	RPS4X	ribosomal protein S4 X-linked	CHEMBL4297789	MT-3724	FALSE	2	FALSE	Reactome	rRNA processing
ENSG00000198242	RPL23A	ribosomal protein L23a	CHEMBL256997	ATALUREN	TRUE	4	FALSE	Reactome	rRNA processing
ENSG00000198242	RPL23A	ribosomal protein L23a	CHEMBL4297744	ELX-02	FALSE	2	FALSE	Reactome	rRNA processing
ENSG00000198242	RPL23A	ribosomal protein L23a	CHEMBL4297789	MT-3724	FALSE	2	FALSE	Reactome	rRNA processing
ENSG00000137154	RPS6	ribosomal protein S6	CHEMBL256997	ATALUREN	TRUE	4	FALSE	Reactome	rRNA processing
ENSG00000137154	RPS6	ribosomal protein S6	CHEMBL4297744	ELX-02	FALSE	2	FALSE	Reactome	rRNA processing
ENSG00000137154	RPS6	ribosomal protein S6	CHEMBL4297789	MT-3724	FALSE	2	FALSE	Reactome	rRNA processing
ENSG00000125691	RPL23	ribosomal protein L23	CHEMBL256997	ATALUREN	TRUE	4	FALSE	Reactome	rRNA processing
ENSG00000125691	RPL23	ribosomal protein L23	CHEMBL4297789	MT-3724	FALSE	2	FALSE	Reactome	rRNA processing
ENSG00000125691	RPL23	ribosomal protein L23	CHEMBL4297744	ELX-02	FALSE	2	FALSE	Reactome	rRNA processing
ENSG00000115268	RPS15	ribosomal protein S15	CHEMBL256997	ATALUREN	TRUE	4	FALSE	Reactome	rRNA processing
ENSG00000115268	RPS15	ribosomal protein S15	CHEMBL4297744	ELX-02	FALSE	2	FALSE	Reactome	rRNA processing
ENSG00000115268	RPS15	ribosomal protein S15	CHEMBL4297789	MT-3724	FALSE	2	FALSE	Reactome	rRNA processing
ENSG00000138326	RPS24	ribosomal protein S24	CHEMBL256997	ATALUREN	TRUE	4	FALSE	Reactome	rRNA processing
ENSG00000138326	RPS24	ribosomal protein S24	CHEMBL4297789	MT-3724	FALSE	2	FALSE	Reactome	rRNA processing
ENSG00000138326	RPS24	ribosomal protein S24	CHEMBL4297744	ELX-02	FALSE	2	FALSE	Reactome	rRNA processing
ENSG00000197728	RPS26	ribosomal protein S26	CHEMBL256997	ATALUREN	TRUE	4	FALSE	Reactome	rRNA processing
ENSG00000197728	RPS26	ribosomal protein S26	CHEMBL4297744	ELX-02	FALSE	2	FALSE	Reactome	rRNA processing
ENSG00000197728	RPS26	ribosomal protein S26	CHEMBL4297789	MT-3724	FALSE	2	FALSE	Reactome	rRNA processing
ENSG00000233927	RPS28	ribosomal protein S28	CHEMBL256997	ATALUREN	TRUE	4	FALSE	Reactome	rRNA processing
ENSG00000233927	RPS28	ribosomal protein S28	CHEMBL4297744	ELX-02	FALSE	2	FALSE	Reactome	rRNA processing
ENSG00000233927	RPS28	ribosomal protein S28	CHEMBL4297789	MT-3724	FALSE	2	FALSE	Reactome	rRNA processing
ENSG00000149806	FAU	FAU ubiquitin like and ribosomal protein S30 fusion	CHEMBL256997	ATALUREN	TRUE	4	FALSE	Reactome	rRNA processing
ENSG00000149806	FAU	FAU ubiquitin like and ribosomal protein S30 fusion	CHEMBL4297744	ELX-02	FALSE	2	FALSE	Reactome	rRNA processing
ENSG00000149806	FAU	FAU ubiquitin like and ribosomal protein S30 fusion	CHEMBL4297789	MT-3724	FALSE	2	FALSE	Reactome	rRNA processing
ENSG00000156482	RPL30	ribosomal protein L30	CHEMBL256997	ATALUREN	TRUE	4	FALSE	Reactome	rRNA processing
ENSG00000156482	RPL30	ribosomal protein L30	CHEMBL4297789	MT-3724	FALSE	2	FALSE	Reactome	rRNA processing
ENSG00000156482	RPL30	ribosomal protein L30	CHEMBL4297744	ELX-02	FALSE	2	FALSE	Reactome	rRNA processing
ENSG00000198918	RPL39	ribosomal protein L39	CHEMBL256997	ATALUREN	TRUE	4	FALSE	Reactome	rRNA processing
ENSG00000198918	RPL39	ribosomal protein L39	CHEMBL4297744	ELX-02	FALSE	2	FALSE	Reactome	rRNA processing
ENSG00000198918	RPL39	ribosomal protein L39	CHEMBL4297789	MT-3724	FALSE	2	FALSE	Reactome	rRNA processing
ENSG00000071082	RPL31	ribosomal protein L31	CHEMBL256997	ATALUREN	TRUE	4	FALSE	Reactome	rRNA processing
ENSG00000071082	RPL31	ribosomal protein L31	CHEMBL4297744	ELX-02	FALSE	2	FALSE	Reactome	rRNA processing
ENSG00000071082	RPL31	ribosomal protein L31	CHEMBL4297789	MT-3724	FALSE	2	FALSE	Reactome	rRNA processing
ENSG00000198755	RPL10A	ribosomal protein L10a	CHEMBL256997	ATALUREN	TRUE	4	FALSE	Reactome	rRNA processing
ENSG00000198755	RPL10A	ribosomal protein L10a	CHEMBL4297789	MT-3724	FALSE	2	FALSE	Reactome	rRNA processing
ENSG00000198755	RPL10A	ribosomal protein L10a	CHEMBL4297744	ELX-02	FALSE	2	FALSE	Reactome	rRNA processing
ENSG00000144713	RPL32	ribosomal protein L32	CHEMBL256997	ATALUREN	TRUE	4	FALSE	Reactome	rRNA processing
ENSG00000144713	RPL32	ribosomal protein L32	CHEMBL4297744	ELX-02	FALSE	2	FALSE	Reactome	rRNA processing
ENSG00000144713	RPL32	ribosomal protein L32	CHEMBL4297789	MT-3724	FALSE	2	FALSE	Reactome	rRNA processing
ENSG00000142676	RPL11	ribosomal protein L11	CHEMBL256997	ATALUREN	TRUE	4	FALSE	Reactome	rRNA processing
ENSG00000142676	RPL11	ribosomal protein L11	CHEMBL4297789	MT-3724	FALSE	2	FALSE	Reactome	rRNA processing
ENSG00000142676	RPL11	ribosomal protein L11	CHEMBL4297744	ELX-02	FALSE	2	FALSE	Reactome	rRNA processing
ENSG00000161016	RPL8	ribosomal protein L8	CHEMBL256997	ATALUREN	TRUE	4	FALSE	Reactome	rRNA processing
ENSG00000161016	RPL8	ribosomal protein L8	CHEMBL4297744	ELX-02	FALSE	2	FALSE	Reactome	rRNA processing
ENSG00000161016	RPL8	ribosomal protein L8	CHEMBL4297789	MT-3724	FALSE	2	FALSE	Reactome	rRNA processing
ENSG00000229117	RPL41	ribosomal protein L41	CHEMBL256997	ATALUREN	TRUE	4	FALSE	Reactome	rRNA processing
ENSG00000229117	RPL41	ribosomal protein L41	CHEMBL4297744	ELX-02	FALSE	2	FALSE	Reactome	rRNA processing
ENSG00000229117	RPL41	ribosomal protein L41	CHEMBL4297789	MT-3724	FALSE	2	FALSE	Reactome	rRNA processing
ENSG00000143947	RPS27A	ribosomal protein S27a	CHEMBL256997	ATALUREN	TRUE	4	FALSE	Reactome	rRNA processing
ENSG00000143947	RPS27A	ribosomal protein S27a	CHEMBL4297744	ELX-02	FALSE	2	FALSE	Reactome	rRNA processing
ENSG00000143947	RPS27A	ribosomal protein S27a	CHEMBL4297789	MT-3724	FALSE	2	FALSE	Reactome	rRNA processing
ENSG00000172809	RPL38	ribosomal protein L38	CHEMBL256997	ATALUREN	TRUE	4	FALSE	Reactome	rRNA processing
ENSG00000172809	RPL38	ribosomal protein L38	CHEMBL4297744	ELX-02	FALSE	2	FALSE	Reactome	rRNA processing
ENSG00000172809	RPL38	ribosomal protein L38	CHEMBL4297789	MT-3724	FALSE	2	FALSE	Reactome	rRNA processing
ENSG00000171858	RPS21	ribosomal protein S21	CHEMBL256997	ATALUREN	TRUE	4	FALSE	Reactome	rRNA processing
ENSG00000171858	RPS21	ribosomal protein S21	CHEMBL4297744	ELX-02	FALSE	2	FALSE	Reactome	rRNA processing
ENSG00000171858	RPS21	ribosomal protein S21	CHEMBL4297789	MT-3724	FALSE	2	FALSE	Reactome	rRNA processing
ENSG00000114391	RPL24	ribosomal protein L24	CHEMBL256997	ATALUREN	TRUE	4	FALSE	Reactome	rRNA processing
ENSG00000114391	RPL24	ribosomal protein L24	CHEMBL4297744	ELX-02	FALSE	2	FALSE	Reactome	rRNA processing
ENSG00000114391	RPL24	ribosomal protein L24	CHEMBL4297789	MT-3724	FALSE	2	FALSE	Reactome	rRNA processing
ENSG00000241343	RPL36A	ribosomal protein L36a	CHEMBL256997	ATALUREN	TRUE	4	FALSE	Reactome	rRNA processing
ENSG00000241343	RPL36A	ribosomal protein L36a	CHEMBL4297744	ELX-02	FALSE	2	FALSE	Reactome	rRNA processing
ENSG00000241343	RPL36A	ribosomal protein L36a	CHEMBL4297789	MT-3724	FALSE	2	FALSE	Reactome	rRNA processing
ENSG00000108298	RPL19	ribosomal protein L19	CHEMBL256997	ATALUREN	TRUE	4	FALSE	Reactome	rRNA processing
ENSG00000108298	RPL19	ribosomal protein L19	CHEMBL4297744	ELX-02	FALSE	2	FALSE	Reactome	rRNA processing
ENSG00000108298	RPL19	ribosomal protein L19	CHEMBL4297789	MT-3724	FALSE	2	FALSE	Reactome	rRNA processing
ENSG00000105640	RPL18A	ribosomal protein L18a	CHEMBL256997	ATALUREN	TRUE	4	FALSE	Reactome	rRNA processing
ENSG00000105640	RPL18A	ribosomal protein L18a	CHEMBL4297744	ELX-02	FALSE	2	FALSE	Reactome	rRNA processing
ENSG00000105640	RPL18A	ribosomal protein L18a	CHEMBL4297789	MT-3724	FALSE	2	FALSE	Reactome	rRNA processing
ENSG00000089009	RPL6	ribosomal protein L6	CHEMBL256997	ATALUREN	TRUE	4	FALSE	Reactome	rRNA processing
ENSG00000089009	RPL6	ribosomal protein L6	CHEMBL4297744	ELX-02	FALSE	2	FALSE	Reactome	rRNA processing
ENSG00000089009	RPL6	ribosomal protein L6	CHEMBL4297789	MT-3724	FALSE	2	FALSE	Reactome	rRNA processing
ENSG00000063177	RPL18	ribosomal protein L18	CHEMBL256997	ATALUREN	TRUE	4	FALSE	Reactome	rRNA processing
ENSG00000063177	RPL18	ribosomal protein L18	CHEMBL4297744	ELX-02	FALSE	2	FALSE	Reactome	rRNA processing
ENSG00000063177	RPL18	ribosomal protein L18	CHEMBL4297789	MT-3724	FALSE	2	FALSE	Reactome	rRNA processing
ENSG00000130255	RPL36	ribosomal protein L36	CHEMBL256997	ATALUREN	TRUE	4	FALSE	Reactome	rRNA processing
ENSG00000130255	RPL36	ribosomal protein L36	CHEMBL4297744	ELX-02	FALSE	2	FALSE	Reactome	rRNA processing
ENSG00000130255	RPL36	ribosomal protein L36	CHEMBL4297789	MT-3724	FALSE	2	FALSE	Reactome	rRNA processing
ENSG00000137818	RPLP1	ribosomal protein lateral stalk subunit P1	CHEMBL256997	ATALUREN	TRUE	4	FALSE	Reactome	Eukaryotic Translation Elongation
ENSG00000137818	RPLP1	ribosomal protein lateral stalk subunit P1	CHEMBL4297789	MT-3724	FALSE	2	FALSE	Reactome	Eukaryotic Translation Elongation
ENSG00000137818	RPLP1	ribosomal protein lateral stalk subunit P1	CHEMBL4297744	ELX-02	FALSE	2	FALSE	Reactome	Eukaryotic Translation Elongation
ENSG00000089157	RPLP0	ribosomal protein lateral stalk subunit P0	CHEMBL256997	ATALUREN	TRUE	4	FALSE	Reactome	Eukaryotic Translation Elongation
ENSG00000089157	RPLP0	ribosomal protein lateral stalk subunit P0	CHEMBL4297789	MT-3724	FALSE	2	FALSE	Reactome	Eukaryotic Translation Elongation
ENSG00000089157	RPLP0	ribosomal protein lateral stalk subunit P0	CHEMBL4297744	ELX-02	FALSE	2	FALSE	Reactome	Eukaryotic Translation Elongation
ENSG00000168028	RPSA	ribosomal protein SA	CHEMBL256997	ATALUREN	TRUE	4	FALSE	Reactome	Eukaryotic Translation Elongation
ENSG00000168028	RPSA	ribosomal protein SA	CHEMBL4297744	ELX-02	FALSE	2	FALSE	Reactome	Eukaryotic Translation Elongation
ENSG00000168028	RPSA	ribosomal protein SA	CHEMBL4297789	MT-3724	FALSE	2	FALSE	Reactome	Eukaryotic Translation Elongation
ENSG00000140988	RPS2	ribosomal protein S2	CHEMBL256997	ATALUREN	TRUE	4	FALSE	Reactome	Eukaryotic Translation Elongation
ENSG00000140988	RPS2	ribosomal protein S2	CHEMBL4297744	ELX-02	FALSE	2	FALSE	Reactome	Eukaryotic Translation Elongation
ENSG00000140988	RPS2	ribosomal protein S2	CHEMBL4297789	MT-3724	FALSE	2	FALSE	Reactome	Eukaryotic Translation Elongation
ENSG00000182899	RPL35A	ribosomal protein L35a	CHEMBL256997	ATALUREN	TRUE	4	FALSE	Reactome	Eukaryotic Translation Elongation
ENSG00000182899	RPL35A	ribosomal protein L35a	CHEMBL4297789	MT-3724	FALSE	2	FALSE	Reactome	Eukaryotic Translation Elongation
ENSG00000182899	RPL35A	ribosomal protein L35a	CHEMBL4297744	ELX-02	FALSE	2	FALSE	Reactome	Eukaryotic Translation Elongation
ENSG00000147604	RPL7	ribosomal protein L7	CHEMBL256997	ATALUREN	TRUE	4	FALSE	Reactome	Eukaryotic Translation Elongation
ENSG00000147604	RPL7	ribosomal protein L7	CHEMBL4297744	ELX-02	FALSE	2	FALSE	Reactome	Eukaryotic Translation Elongation
ENSG00000147604	RPL7	ribosomal protein L7	CHEMBL4297789	MT-3724	FALSE	2	FALSE	Reactome	Eukaryotic Translation Elongation
ENSG00000265681	RPL17	ribosomal protein L17	CHEMBL256997	ATALUREN	TRUE	4	FALSE	Reactome	Eukaryotic Translation Elongation
ENSG00000265681	RPL17	ribosomal protein L17	CHEMBL4297744	ELX-02	FALSE	2	FALSE	Reactome	Eukaryotic Translation Elongation
ENSG00000265681	RPL17	ribosomal protein L17	CHEMBL4297789	MT-3724	FALSE	2	FALSE	Reactome	Eukaryotic Translation Elongation
ENSG00000129824	RPS4Y1	ribosomal protein S4 Y-linked 1	CHEMBL256997	ATALUREN	TRUE	4	FALSE	Reactome	Eukaryotic Translation Elongation
ENSG00000129824	RPS4Y1	ribosomal protein S4 Y-linked 1	CHEMBL4297744	ELX-02	FALSE	2	FALSE	Reactome	Eukaryotic Translation Elongation
ENSG00000129824	RPS4Y1	ribosomal protein S4 Y-linked 1	CHEMBL4297789	MT-3724	FALSE	2	FALSE	Reactome	Eukaryotic Translation Elongation
ENSG00000149273	RPS3	ribosomal protein S3	CHEMBL256997	ATALUREN	TRUE	4	FALSE	Reactome	Eukaryotic Translation Elongation
ENSG00000149273	RPS3	ribosomal protein S3	CHEMBL4297789	MT-3724	FALSE	2	FALSE	Reactome	Eukaryotic Translation Elongation
ENSG00000149273	RPS3	ribosomal protein S3	CHEMBL4297744	ELX-02	FALSE	2	FALSE	Reactome	Eukaryotic Translation Elongation
ENSG00000112306	RPS12	ribosomal protein S12	CHEMBL256997	ATALUREN	TRUE	4	FALSE	Reactome	Eukaryotic Translation Elongation
ENSG00000112306	RPS12	ribosomal protein S12	CHEMBL4297744	ELX-02	FALSE	2	FALSE	Reactome	Eukaryotic Translation Elongation
ENSG00000112306	RPS12	ribosomal protein S12	CHEMBL4297789	MT-3724	FALSE	2	FALSE	Reactome	Eukaryotic Translation Elongation
ENSG00000167526	RPL13	ribosomal protein L13	CHEMBL256997	ATALUREN	TRUE	4	FALSE	Reactome	Eukaryotic Translation Elongation
ENSG00000167526	RPL13	ribosomal protein L13	CHEMBL4297789	MT-3724	FALSE	2	FALSE	Reactome	Eukaryotic Translation Elongation
ENSG00000167526	RPL13	ribosomal protein L13	CHEMBL4297744	ELX-02	FALSE	2	FALSE	Reactome	Eukaryotic Translation Elongation
ENSG00000147403	RPL10	ribosomal protein L10	CHEMBL256997	ATALUREN	TRUE	4	FALSE	Reactome	Eukaryotic Translation Elongation
ENSG00000147403	RPL10	ribosomal protein L10	CHEMBL4297744	ELX-02	FALSE	2	FALSE	Reactome	Eukaryotic Translation Elongation
ENSG00000147403	RPL10	ribosomal protein L10	CHEMBL4297789	MT-3724	FALSE	2	FALSE	Reactome	Eukaryotic Translation Elongation
ENSG00000197958	RPL12	ribosomal protein L12	CHEMBL256997	ATALUREN	TRUE	4	FALSE	Reactome	Eukaryotic Translation Elongation
ENSG00000197958	RPL12	ribosomal protein L12	CHEMBL4297744	ELX-02	FALSE	2	FALSE	Reactome	Eukaryotic Translation Elongation
ENSG00000197958	RPL12	ribosomal protein L12	CHEMBL4297789	MT-3724	FALSE	2	FALSE	Reactome	Eukaryotic Translation Elongation
ENSG00000163682	RPL9	ribosomal protein L9	CHEMBL256997	ATALUREN	TRUE	4	FALSE	Reactome	Eukaryotic Translation Elongation
ENSG00000163682	RPL9	ribosomal protein L9	CHEMBL4297744	ELX-02	FALSE	2	FALSE	Reactome	Eukaryotic Translation Elongation
ENSG00000163682	RPL9	ribosomal protein L9	CHEMBL4297789	MT-3724	FALSE	2	FALSE	Reactome	Eukaryotic Translation Elongation
ENSG00000116251	RPL22	ribosomal protein L22	CHEMBL256997	ATALUREN	TRUE	4	FALSE	Reactome	Eukaryotic Translation Elongation
ENSG00000116251	RPL22	ribosomal protein L22	CHEMBL4297789	MT-3724	FALSE	2	FALSE	Reactome	Eukaryotic Translation Elongation
ENSG00000116251	RPL22	ribosomal protein L22	CHEMBL4297744	ELX-02	FALSE	2	FALSE	Reactome	Eukaryotic Translation Elongation
ENSG00000174444	RPL4	ribosomal protein L4	CHEMBL256997	ATALUREN	TRUE	4	FALSE	Reactome	Eukaryotic Translation Elongation
ENSG00000174444	RPL4	ribosomal protein L4	CHEMBL4297744	ELX-02	FALSE	2	FALSE	Reactome	Eukaryotic Translation Elongation
ENSG00000174444	RPL4	ribosomal protein L4	CHEMBL4297789	MT-3724	FALSE	2	FALSE	Reactome	Eukaryotic Translation Elongation
ENSG00000105372	RPS19	ribosomal protein S19	CHEMBL256997	ATALUREN	TRUE	4	FALSE	Reactome	Eukaryotic Translation Elongation
ENSG00000105372	RPS19	ribosomal protein S19	CHEMBL4297744	ELX-02	FALSE	2	FALSE	Reactome	Eukaryotic Translation Elongation
ENSG00000105372	RPS19	ribosomal protein S19	CHEMBL4297789	MT-3724	FALSE	2	FALSE	Reactome	Eukaryotic Translation Elongation
ENSG00000100316	RPL3	ribosomal protein L3	CHEMBL256997	ATALUREN	TRUE	4	FALSE	Reactome	Eukaryotic Translation Elongation
ENSG00000100316	RPL3	ribosomal protein L3	CHEMBL4297744	ELX-02	FALSE	2	FALSE	Reactome	Eukaryotic Translation Elongation
ENSG00000100316	RPL3	ribosomal protein L3	CHEMBL4297789	MT-3724	FALSE	2	FALSE	Reactome	Eukaryotic Translation Elongation
ENSG00000142541	RPL13A	ribosomal protein L13a	CHEMBL256997	ATALUREN	TRUE	4	FALSE	Reactome	Eukaryotic Translation Elongation
ENSG00000142541	RPL13A	ribosomal protein L13a	CHEMBL4297789	MT-3724	FALSE	2	FALSE	Reactome	Eukaryotic Translation Elongation
ENSG00000142541	RPL13A	ribosomal protein L13a	CHEMBL4297744	ELX-02	FALSE	2	FALSE	Reactome	Eukaryotic Translation Elongation
ENSG00000177954	RPS27	ribosomal protein S27	CHEMBL256997	ATALUREN	TRUE	4	FALSE	Reactome	Eukaryotic Translation Elongation
ENSG00000177954	RPS27	ribosomal protein S27	CHEMBL4297744	ELX-02	FALSE	2	FALSE	Reactome	Eukaryotic Translation Elongation
ENSG00000177954	RPS27	ribosomal protein S27	CHEMBL4297789	MT-3724	FALSE	2	FALSE	Reactome	Eukaryotic Translation Elongation
ENSG00000136942	RPL35	ribosomal protein L35	CHEMBL256997	ATALUREN	TRUE	4	FALSE	Reactome	Eukaryotic Translation Elongation
ENSG00000136942	RPL35	ribosomal protein L35	CHEMBL4297789	MT-3724	FALSE	2	FALSE	Reactome	Eukaryotic Translation Elongation
ENSG00000136942	RPL35	ribosomal protein L35	CHEMBL4297744	ELX-02	FALSE	2	FALSE	Reactome	Eukaryotic Translation Elongation
ENSG00000166441	RPL27A	ribosomal protein L27a	CHEMBL256997	ATALUREN	TRUE	4	FALSE	Reactome	Eukaryotic Translation Elongation
ENSG00000166441	RPL27A	ribosomal protein L27a	CHEMBL4297744	ELX-02	FALSE	2	FALSE	Reactome	Eukaryotic Translation Elongation
ENSG00000166441	RPL27A	ribosomal protein L27a	CHEMBL4297789	MT-3724	FALSE	2	FALSE	Reactome	Eukaryotic Translation Elongation
ENSG00000122406	RPL5	ribosomal protein L5	CHEMBL256997	ATALUREN	TRUE	4	FALSE	Reactome	Eukaryotic Translation Elongation
ENSG00000122406	RPL5	ribosomal protein L5	CHEMBL4297744	ELX-02	FALSE	2	FALSE	Reactome	Eukaryotic Translation Elongation
ENSG00000122406	RPL5	ribosomal protein L5	CHEMBL4297789	MT-3724	FALSE	2	FALSE	Reactome	Eukaryotic Translation Elongation
ENSG00000122026	RPL21	ribosomal protein L21	CHEMBL256997	ATALUREN	TRUE	4	FALSE	Reactome	Eukaryotic Translation Elongation
ENSG00000122026	RPL21	ribosomal protein L21	CHEMBL4297744	ELX-02	FALSE	2	FALSE	Reactome	Eukaryotic Translation Elongation
ENSG00000122026	RPL21	ribosomal protein L21	CHEMBL4297789	MT-3724	FALSE	2	FALSE	Reactome	Eukaryotic Translation Elongation
ENSG00000108107	RPL28	ribosomal protein L28	CHEMBL256997	ATALUREN	TRUE	4	FALSE	Reactome	Eukaryotic Translation Elongation
ENSG00000108107	RPL28	ribosomal protein L28	CHEMBL4297744	ELX-02	FALSE	2	FALSE	Reactome	Eukaryotic Translation Elongation
ENSG00000108107	RPL28	ribosomal protein L28	CHEMBL4297789	MT-3724	FALSE	2	FALSE	Reactome	Eukaryotic Translation Elongation
ENSG00000083845	RPS5	ribosomal protein S5	CHEMBL256997	ATALUREN	TRUE	4	FALSE	Reactome	Eukaryotic Translation Elongation
ENSG00000083845	RPS5	ribosomal protein S5	CHEMBL4297744	ELX-02	FALSE	2	FALSE	Reactome	Eukaryotic Translation Elongation
ENSG00000083845	RPS5	ribosomal protein S5	CHEMBL4297789	MT-3724	FALSE	2	FALSE	Reactome	Eukaryotic Translation Elongation
ENSG00000124614	RPS10	ribosomal protein S10	CHEMBL256997	ATALUREN	TRUE	4	FALSE	Reactome	Eukaryotic Translation Elongation
ENSG00000124614	RPS10	ribosomal protein S10	CHEMBL4297744	ELX-02	FALSE	2	FALSE	Reactome	Eukaryotic Translation Elongation
ENSG00000124614	RPS10	ribosomal protein S10	CHEMBL4297789	MT-3724	FALSE	2	FALSE	Reactome	Eukaryotic Translation Elongation
ENSG00000162244	RPL29	ribosomal protein L29	CHEMBL256997	ATALUREN	TRUE	4	FALSE	Reactome	Eukaryotic Translation Elongation
ENSG00000162244	RPL29	ribosomal protein L29	CHEMBL4297789	MT-3724	FALSE	2	FALSE	Reactome	Eukaryotic Translation Elongation
ENSG00000162244	RPL29	ribosomal protein L29	CHEMBL4297744	ELX-02	FALSE	2	FALSE	Reactome	Eukaryotic Translation Elongation
ENSG00000109475	RPL34	ribosomal protein L34	CHEMBL256997	ATALUREN	TRUE	4	FALSE	Reactome	Eukaryotic Translation Elongation
ENSG00000109475	RPL34	ribosomal protein L34	CHEMBL4297789	MT-3724	FALSE	2	FALSE	Reactome	Eukaryotic Translation Elongation
ENSG00000109475	RPL34	ribosomal protein L34	CHEMBL4297744	ELX-02	FALSE	2	FALSE	Reactome	Eukaryotic Translation Elongation
ENSG00000188846	RPL14	ribosomal protein L14	CHEMBL256997	ATALUREN	TRUE	4	FALSE	Reactome	Eukaryotic Translation Elongation
ENSG00000188846	RPL14	ribosomal protein L14	CHEMBL4297744	ELX-02	FALSE	2	FALSE	Reactome	Eukaryotic Translation Elongation
ENSG00000188846	RPL14	ribosomal protein L14	CHEMBL4297789	MT-3724	FALSE	2	FALSE	Reactome	Eukaryotic Translation Elongation
ENSG00000008988	RPS20	ribosomal protein S20	CHEMBL256997	ATALUREN	TRUE	4	FALSE	Reactome	Eukaryotic Translation Elongation
ENSG00000008988	RPS20	ribosomal protein S20	CHEMBL4297744	ELX-02	FALSE	2	FALSE	Reactome	Eukaryotic Translation Elongation
ENSG00000008988	RPS20	ribosomal protein S20	CHEMBL4297789	MT-3724	FALSE	2	FALSE	Reactome	Eukaryotic Translation Elongation
ENSG00000145425	RPS3A	ribosomal protein S3A	CHEMBL256997	ATALUREN	TRUE	4	FALSE	Reactome	Eukaryotic Translation Elongation
ENSG00000145425	RPS3A	ribosomal protein S3A	CHEMBL4297744	ELX-02	FALSE	2	FALSE	Reactome	Eukaryotic Translation Elongation
ENSG00000145425	RPS3A	ribosomal protein S3A	CHEMBL4297789	MT-3724	FALSE	2	FALSE	Reactome	Eukaryotic Translation Elongation
ENSG00000161970	RPL26	ribosomal protein L26	CHEMBL256997	ATALUREN	TRUE	4	FALSE	Reactome	Eukaryotic Translation Elongation
ENSG00000161970	RPL26	ribosomal protein L26	CHEMBL4297789	MT-3724	FALSE	2	FALSE	Reactome	Eukaryotic Translation Elongation
ENSG00000161970	RPL26	ribosomal protein L26	CHEMBL4297744	ELX-02	FALSE	2	FALSE	Reactome	Eukaryotic Translation Elongation
ENSG00000174748	RPL15	ribosomal protein L15	CHEMBL256997	ATALUREN	TRUE	4	FALSE	Reactome	Eukaryotic Translation Elongation
ENSG00000174748	RPL15	ribosomal protein L15	CHEMBL4297789	MT-3724	FALSE	2	FALSE	Reactome	Eukaryotic Translation Elongation
ENSG00000174748	RPL15	ribosomal protein L15	CHEMBL4297744	ELX-02	FALSE	2	FALSE	Reactome	Eukaryotic Translation Elongation
ENSG00000131469	RPL27	ribosomal protein L27	CHEMBL256997	ATALUREN	TRUE	4	FALSE	Reactome	Eukaryotic Translation Elongation
ENSG00000131469	RPL27	ribosomal protein L27	CHEMBL4297744	ELX-02	FALSE	2	FALSE	Reactome	Eukaryotic Translation Elongation
ENSG00000131469	RPL27	ribosomal protein L27	CHEMBL4297789	MT-3724	FALSE	2	FALSE	Reactome	Eukaryotic Translation Elongation
ENSG00000197756	RPL37A	ribosomal protein L37a	CHEMBL256997	ATALUREN	TRUE	4	FALSE	Reactome	Eukaryotic Translation Elongation
ENSG00000197756	RPL37A	ribosomal protein L37a	CHEMBL4297744	ELX-02	FALSE	2	FALSE	Reactome	Eukaryotic Translation Elongation
ENSG00000197756	RPL37A	ribosomal protein L37a	CHEMBL4297789	MT-3724	FALSE	2	FALSE	Reactome	Eukaryotic Translation Elongation
ENSG00000145592	RPL37	ribosomal protein L37	CHEMBL256997	ATALUREN	TRUE	4	FALSE	Reactome	Eukaryotic Translation Elongation
ENSG00000145592	RPL37	ribosomal protein L37	CHEMBL4297744	ELX-02	FALSE	2	FALSE	Reactome	Eukaryotic Translation Elongation
ENSG00000145592	RPL37	ribosomal protein L37	CHEMBL4297789	MT-3724	FALSE	2	FALSE	Reactome	Eukaryotic Translation Elongation
ENSG00000171863	RPS7	ribosomal protein S7	CHEMBL256997	ATALUREN	TRUE	4	FALSE	Reactome	Eukaryotic Translation Elongation
ENSG00000171863	RPS7	ribosomal protein S7	CHEMBL4297789	MT-3724	FALSE	2	FALSE	Reactome	Eukaryotic Translation Elongation
ENSG00000171863	RPS7	ribosomal protein S7	CHEMBL4297744	ELX-02	FALSE	2	FALSE	Reactome	Eukaryotic Translation Elongation
ENSG00000142937	RPS8	ribosomal protein S8	CHEMBL256997	ATALUREN	TRUE	4	FALSE	Reactome	Eukaryotic Translation Elongation
ENSG00000142937	RPS8	ribosomal protein S8	CHEMBL4297789	MT-3724	FALSE	2	FALSE	Reactome	Eukaryotic Translation Elongation
ENSG00000142937	RPS8	ribosomal protein S8	CHEMBL4297744	ELX-02	FALSE	2	FALSE	Reactome	Eukaryotic Translation Elongation
ENSG00000134419	RPS15A	ribosomal protein S15a	CHEMBL256997	ATALUREN	TRUE	4	FALSE	Reactome	Eukaryotic Translation Elongation
ENSG00000134419	RPS15A	ribosomal protein S15a	CHEMBL4297744	ELX-02	FALSE	2	FALSE	Reactome	Eukaryotic Translation Elongation
ENSG00000134419	RPS15A	ribosomal protein S15a	CHEMBL4297789	MT-3724	FALSE	2	FALSE	Reactome	Eukaryotic Translation Elongation
ENSG00000105193	RPS16	ribosomal protein S16	CHEMBL256997	ATALUREN	TRUE	4	FALSE	Reactome	Eukaryotic Translation Elongation
ENSG00000105193	RPS16	ribosomal protein S16	CHEMBL4297789	MT-3724	FALSE	2	FALSE	Reactome	Eukaryotic Translation Elongation
ENSG00000105193	RPS16	ribosomal protein S16	CHEMBL4297744	ELX-02	FALSE	2	FALSE	Reactome	Eukaryotic Translation Elongation
ENSG00000164587	RPS14	ribosomal protein S14	CHEMBL256997	ATALUREN	TRUE	4	FALSE	Reactome	Eukaryotic Translation Elongation
ENSG00000164587	RPS14	ribosomal protein S14	CHEMBL4297789	MT-3724	FALSE	2	FALSE	Reactome	Eukaryotic Translation Elongation
ENSG00000164587	RPS14	ribosomal protein S14	CHEMBL4297744	ELX-02	FALSE	2	FALSE	Reactome	Eukaryotic Translation Elongation
ENSG00000186468	RPS23	ribosomal protein S23	CHEMBL256997	ATALUREN	TRUE	4	FALSE	Reactome	Eukaryotic Translation Elongation
ENSG00000186468	RPS23	ribosomal protein S23	CHEMBL4297744	ELX-02	FALSE	2	FALSE	Reactome	Eukaryotic Translation Elongation
ENSG00000186468	RPS23	ribosomal protein S23	CHEMBL4297789	MT-3724	FALSE	2	FALSE	Reactome	Eukaryotic Translation Elongation
ENSG00000213741	RPS29	ribosomal protein S29	CHEMBL256997	ATALUREN	TRUE	4	FALSE	Reactome	Eukaryotic Translation Elongation
ENSG00000213741	RPS29	ribosomal protein S29	CHEMBL4297744	ELX-02	FALSE	2	FALSE	Reactome	Eukaryotic Translation Elongation
ENSG00000213741	RPS29	ribosomal protein S29	CHEMBL4297789	MT-3724	FALSE	2	FALSE	Reactome	Eukaryotic Translation Elongation
ENSG00000110700	RPS13	ribosomal protein S13	CHEMBL256997	ATALUREN	TRUE	4	FALSE	Reactome	Eukaryotic Translation Elongation
ENSG00000110700	RPS13	ribosomal protein S13	CHEMBL4297744	ELX-02	FALSE	2	FALSE	Reactome	Eukaryotic Translation Elongation
ENSG00000110700	RPS13	ribosomal protein S13	CHEMBL4297789	MT-3724	FALSE	2	FALSE	Reactome	Eukaryotic Translation Elongation
ENSG00000142534	RPS11	ribosomal protein S11	CHEMBL256997	ATALUREN	TRUE	4	FALSE	Reactome	Eukaryotic Translation Elongation
ENSG00000142534	RPS11	ribosomal protein S11	CHEMBL4297744	ELX-02	FALSE	2	FALSE	Reactome	Eukaryotic Translation Elongation
ENSG00000142534	RPS11	ribosomal protein S11	CHEMBL4297789	MT-3724	FALSE	2	FALSE	Reactome	Eukaryotic Translation Elongation
ENSG00000198034	RPS4X	ribosomal protein S4 X-linked	CHEMBL256997	ATALUREN	TRUE	4	FALSE	Reactome	Eukaryotic Translation Elongation
ENSG00000198034	RPS4X	ribosomal protein S4 X-linked	CHEMBL4297744	ELX-02	FALSE	2	FALSE	Reactome	Eukaryotic Translation Elongation
ENSG00000198034	RPS4X	ribosomal protein S4 X-linked	CHEMBL4297789	MT-3724	FALSE	2	FALSE	Reactome	Eukaryotic Translation Elongation
ENSG00000198242	RPL23A	ribosomal protein L23a	CHEMBL256997	ATALUREN	TRUE	4	FALSE	Reactome	Eukaryotic Translation Elongation
ENSG00000198242	RPL23A	ribosomal protein L23a	CHEMBL4297744	ELX-02	FALSE	2	FALSE	Reactome	Eukaryotic Translation Elongation
ENSG00000198242	RPL23A	ribosomal protein L23a	CHEMBL4297789	MT-3724	FALSE	2	FALSE	Reactome	Eukaryotic Translation Elongation
ENSG00000137154	RPS6	ribosomal protein S6	CHEMBL256997	ATALUREN	TRUE	4	FALSE	Reactome	Eukaryotic Translation Elongation
ENSG00000137154	RPS6	ribosomal protein S6	CHEMBL4297744	ELX-02	FALSE	2	FALSE	Reactome	Eukaryotic Translation Elongation
ENSG00000137154	RPS6	ribosomal protein S6	CHEMBL4297789	MT-3724	FALSE	2	FALSE	Reactome	Eukaryotic Translation Elongation
ENSG00000125691	RPL23	ribosomal protein L23	CHEMBL256997	ATALUREN	TRUE	4	FALSE	Reactome	Eukaryotic Translation Elongation
ENSG00000125691	RPL23	ribosomal protein L23	CHEMBL4297789	MT-3724	FALSE	2	FALSE	Reactome	Eukaryotic Translation Elongation
ENSG00000125691	RPL23	ribosomal protein L23	CHEMBL4297744	ELX-02	FALSE	2	FALSE	Reactome	Eukaryotic Translation Elongation
ENSG00000115268	RPS15	ribosomal protein S15	CHEMBL256997	ATALUREN	TRUE	4	FALSE	Reactome	Eukaryotic Translation Elongation
ENSG00000115268	RPS15	ribosomal protein S15	CHEMBL4297744	ELX-02	FALSE	2	FALSE	Reactome	Eukaryotic Translation Elongation
ENSG00000115268	RPS15	ribosomal protein S15	CHEMBL4297789	MT-3724	FALSE	2	FALSE	Reactome	Eukaryotic Translation Elongation
ENSG00000138326	RPS24	ribosomal protein S24	CHEMBL256997	ATALUREN	TRUE	4	FALSE	Reactome	Eukaryotic Translation Elongation
ENSG00000138326	RPS24	ribosomal protein S24	CHEMBL4297789	MT-3724	FALSE	2	FALSE	Reactome	Eukaryotic Translation Elongation
ENSG00000138326	RPS24	ribosomal protein S24	CHEMBL4297744	ELX-02	FALSE	2	FALSE	Reactome	Eukaryotic Translation Elongation
ENSG00000197728	RPS26	ribosomal protein S26	CHEMBL256997	ATALUREN	TRUE	4	FALSE	Reactome	Eukaryotic Translation Elongation
ENSG00000197728	RPS26	ribosomal protein S26	CHEMBL4297744	ELX-02	FALSE	2	FALSE	Reactome	Eukaryotic Translation Elongation
ENSG00000197728	RPS26	ribosomal protein S26	CHEMBL4297789	MT-3724	FALSE	2	FALSE	Reactome	Eukaryotic Translation Elongation
ENSG00000233927	RPS28	ribosomal protein S28	CHEMBL256997	ATALUREN	TRUE	4	FALSE	Reactome	Eukaryotic Translation Elongation
ENSG00000233927	RPS28	ribosomal protein S28	CHEMBL4297744	ELX-02	FALSE	2	FALSE	Reactome	Eukaryotic Translation Elongation
ENSG00000233927	RPS28	ribosomal protein S28	CHEMBL4297789	MT-3724	FALSE	2	FALSE	Reactome	Eukaryotic Translation Elongation
ENSG00000149806	FAU	FAU ubiquitin like and ribosomal protein S30 fusion	CHEMBL256997	ATALUREN	TRUE	4	FALSE	Reactome	Eukaryotic Translation Elongation
ENSG00000149806	FAU	FAU ubiquitin like and ribosomal protein S30 fusion	CHEMBL4297744	ELX-02	FALSE	2	FALSE	Reactome	Eukaryotic Translation Elongation
ENSG00000149806	FAU	FAU ubiquitin like and ribosomal protein S30 fusion	CHEMBL4297789	MT-3724	FALSE	2	FALSE	Reactome	Eukaryotic Translation Elongation
ENSG00000156482	RPL30	ribosomal protein L30	CHEMBL256997	ATALUREN	TRUE	4	FALSE	Reactome	Eukaryotic Translation Elongation
ENSG00000156482	RPL30	ribosomal protein L30	CHEMBL4297789	MT-3724	FALSE	2	FALSE	Reactome	Eukaryotic Translation Elongation
ENSG00000156482	RPL30	ribosomal protein L30	CHEMBL4297744	ELX-02	FALSE	2	FALSE	Reactome	Eukaryotic Translation Elongation
ENSG00000198918	RPL39	ribosomal protein L39	CHEMBL256997	ATALUREN	TRUE	4	FALSE	Reactome	Eukaryotic Translation Elongation
ENSG00000198918	RPL39	ribosomal protein L39	CHEMBL4297744	ELX-02	FALSE	2	FALSE	Reactome	Eukaryotic Translation Elongation
ENSG00000198918	RPL39	ribosomal protein L39	CHEMBL4297789	MT-3724	FALSE	2	FALSE	Reactome	Eukaryotic Translation Elongation
ENSG00000071082	RPL31	ribosomal protein L31	CHEMBL256997	ATALUREN	TRUE	4	FALSE	Reactome	Eukaryotic Translation Elongation
ENSG00000071082	RPL31	ribosomal protein L31	CHEMBL4297744	ELX-02	FALSE	2	FALSE	Reactome	Eukaryotic Translation Elongation
ENSG00000071082	RPL31	ribosomal protein L31	CHEMBL4297789	MT-3724	FALSE	2	FALSE	Reactome	Eukaryotic Translation Elongation
ENSG00000198755	RPL10A	ribosomal protein L10a	CHEMBL256997	ATALUREN	TRUE	4	FALSE	Reactome	Eukaryotic Translation Elongation
ENSG00000198755	RPL10A	ribosomal protein L10a	CHEMBL4297789	MT-3724	FALSE	2	FALSE	Reactome	Eukaryotic Translation Elongation
ENSG00000198755	RPL10A	ribosomal protein L10a	CHEMBL4297744	ELX-02	FALSE	2	FALSE	Reactome	Eukaryotic Translation Elongation
ENSG00000144713	RPL32	ribosomal protein L32	CHEMBL256997	ATALUREN	TRUE	4	FALSE	Reactome	Eukaryotic Translation Elongation
ENSG00000144713	RPL32	ribosomal protein L32	CHEMBL4297744	ELX-02	FALSE	2	FALSE	Reactome	Eukaryotic Translation Elongation
ENSG00000144713	RPL32	ribosomal protein L32	CHEMBL4297789	MT-3724	FALSE	2	FALSE	Reactome	Eukaryotic Translation Elongation
ENSG00000142676	RPL11	ribosomal protein L11	CHEMBL256997	ATALUREN	TRUE	4	FALSE	Reactome	Eukaryotic Translation Elongation
ENSG00000142676	RPL11	ribosomal protein L11	CHEMBL4297789	MT-3724	FALSE	2	FALSE	Reactome	Eukaryotic Translation Elongation
ENSG00000142676	RPL11	ribosomal protein L11	CHEMBL4297744	ELX-02	FALSE	2	FALSE	Reactome	Eukaryotic Translation Elongation
ENSG00000161016	RPL8	ribosomal protein L8	CHEMBL256997	ATALUREN	TRUE	4	FALSE	Reactome	Eukaryotic Translation Elongation
ENSG00000161016	RPL8	ribosomal protein L8	CHEMBL4297744	ELX-02	FALSE	2	FALSE	Reactome	Eukaryotic Translation Elongation
ENSG00000161016	RPL8	ribosomal protein L8	CHEMBL4297789	MT-3724	FALSE	2	FALSE	Reactome	Eukaryotic Translation Elongation
ENSG00000229117	RPL41	ribosomal protein L41	CHEMBL256997	ATALUREN	TRUE	4	FALSE	Reactome	Eukaryotic Translation Elongation
ENSG00000229117	RPL41	ribosomal protein L41	CHEMBL4297744	ELX-02	FALSE	2	FALSE	Reactome	Eukaryotic Translation Elongation
ENSG00000229117	RPL41	ribosomal protein L41	CHEMBL4297789	MT-3724	FALSE	2	FALSE	Reactome	Eukaryotic Translation Elongation
ENSG00000143947	RPS27A	ribosomal protein S27a	CHEMBL256997	ATALUREN	TRUE	4	FALSE	Reactome	Eukaryotic Translation Elongation
ENSG00000143947	RPS27A	ribosomal protein S27a	CHEMBL4297744	ELX-02	FALSE	2	FALSE	Reactome	Eukaryotic Translation Elongation
ENSG00000143947	RPS27A	ribosomal protein S27a	CHEMBL4297789	MT-3724	FALSE	2	FALSE	Reactome	Eukaryotic Translation Elongation
ENSG00000172809	RPL38	ribosomal protein L38	CHEMBL256997	ATALUREN	TRUE	4	FALSE	Reactome	Eukaryotic Translation Elongation
ENSG00000172809	RPL38	ribosomal protein L38	CHEMBL4297744	ELX-02	FALSE	2	FALSE	Reactome	Eukaryotic Translation Elongation
ENSG00000172809	RPL38	ribosomal protein L38	CHEMBL4297789	MT-3724	FALSE	2	FALSE	Reactome	Eukaryotic Translation Elongation
ENSG00000171858	RPS21	ribosomal protein S21	CHEMBL256997	ATALUREN	TRUE	4	FALSE	Reactome	Eukaryotic Translation Elongation
ENSG00000171858	RPS21	ribosomal protein S21	CHEMBL4297744	ELX-02	FALSE	2	FALSE	Reactome	Eukaryotic Translation Elongation
ENSG00000171858	RPS21	ribosomal protein S21	CHEMBL4297789	MT-3724	FALSE	2	FALSE	Reactome	Eukaryotic Translation Elongation
ENSG00000114391	RPL24	ribosomal protein L24	CHEMBL256997	ATALUREN	TRUE	4	FALSE	Reactome	Eukaryotic Translation Elongation
ENSG00000114391	RPL24	ribosomal protein L24	CHEMBL4297744	ELX-02	FALSE	2	FALSE	Reactome	Eukaryotic Translation Elongation
ENSG00000114391	RPL24	ribosomal protein L24	CHEMBL4297789	MT-3724	FALSE	2	FALSE	Reactome	Eukaryotic Translation Elongation
ENSG00000241343	RPL36A	ribosomal protein L36a	CHEMBL256997	ATALUREN	TRUE	4	FALSE	Reactome	Eukaryotic Translation Elongation
ENSG00000241343	RPL36A	ribosomal protein L36a	CHEMBL4297744	ELX-02	FALSE	2	FALSE	Reactome	Eukaryotic Translation Elongation
ENSG00000241343	RPL36A	ribosomal protein L36a	CHEMBL4297789	MT-3724	FALSE	2	FALSE	Reactome	Eukaryotic Translation Elongation
ENSG00000108298	RPL19	ribosomal protein L19	CHEMBL256997	ATALUREN	TRUE	4	FALSE	Reactome	Eukaryotic Translation Elongation
ENSG00000108298	RPL19	ribosomal protein L19	CHEMBL4297744	ELX-02	FALSE	2	FALSE	Reactome	Eukaryotic Translation Elongation
ENSG00000108298	RPL19	ribosomal protein L19	CHEMBL4297789	MT-3724	FALSE	2	FALSE	Reactome	Eukaryotic Translation Elongation
ENSG00000105640	RPL18A	ribosomal protein L18a	CHEMBL256997	ATALUREN	TRUE	4	FALSE	Reactome	Eukaryotic Translation Elongation
ENSG00000105640	RPL18A	ribosomal protein L18a	CHEMBL4297744	ELX-02	FALSE	2	FALSE	Reactome	Eukaryotic Translation Elongation
ENSG00000105640	RPL18A	ribosomal protein L18a	CHEMBL4297789	MT-3724	FALSE	2	FALSE	Reactome	Eukaryotic Translation Elongation
ENSG00000089009	RPL6	ribosomal protein L6	CHEMBL256997	ATALUREN	TRUE	4	FALSE	Reactome	Eukaryotic Translation Elongation
ENSG00000089009	RPL6	ribosomal protein L6	CHEMBL4297744	ELX-02	FALSE	2	FALSE	Reactome	Eukaryotic Translation Elongation
ENSG00000089009	RPL6	ribosomal protein L6	CHEMBL4297789	MT-3724	FALSE	2	FALSE	Reactome	Eukaryotic Translation Elongation
ENSG00000101210	EEF1A2	eukaryotic translation elongation factor 1 alpha 2	CHEMBL451930	PLITIDEPSIN	FALSE	3	FALSE	Reactome	Eukaryotic Translation Elongation
ENSG00000063177	RPL18	ribosomal protein L18	CHEMBL256997	ATALUREN	TRUE	4	FALSE	Reactome	Eukaryotic Translation Elongation
ENSG00000063177	RPL18	ribosomal protein L18	CHEMBL4297744	ELX-02	FALSE	2	FALSE	Reactome	Eukaryotic Translation Elongation
ENSG00000063177	RPL18	ribosomal protein L18	CHEMBL4297789	MT-3724	FALSE	2	FALSE	Reactome	Eukaryotic Translation Elongation
ENSG00000130255	RPL36	ribosomal protein L36	CHEMBL256997	ATALUREN	TRUE	4	FALSE	Reactome	Eukaryotic Translation Elongation
ENSG00000130255	RPL36	ribosomal protein L36	CHEMBL4297744	ELX-02	FALSE	2	FALSE	Reactome	Eukaryotic Translation Elongation
ENSG00000130255	RPL36	ribosomal protein L36	CHEMBL4297789	MT-3724	FALSE	2	FALSE	Reactome	Eukaryotic Translation Elongation
ENSG00000137818	RPLP1	ribosomal protein lateral stalk subunit P1	CHEMBL256997	ATALUREN	TRUE	4	FALSE	Reactome	Peptide chain elongation
ENSG00000137818	RPLP1	ribosomal protein lateral stalk subunit P1	CHEMBL4297789	MT-3724	FALSE	2	FALSE	Reactome	Peptide chain elongation
ENSG00000137818	RPLP1	ribosomal protein lateral stalk subunit P1	CHEMBL4297744	ELX-02	FALSE	2	FALSE	Reactome	Peptide chain elongation
ENSG00000089157	RPLP0	ribosomal protein lateral stalk subunit P0	CHEMBL256997	ATALUREN	TRUE	4	FALSE	Reactome	Peptide chain elongation
ENSG00000089157	RPLP0	ribosomal protein lateral stalk subunit P0	CHEMBL4297789	MT-3724	FALSE	2	FALSE	Reactome	Peptide chain elongation
ENSG00000089157	RPLP0	ribosomal protein lateral stalk subunit P0	CHEMBL4297744	ELX-02	FALSE	2	FALSE	Reactome	Peptide chain elongation
ENSG00000168028	RPSA	ribosomal protein SA	CHEMBL256997	ATALUREN	TRUE	4	FALSE	Reactome	Peptide chain elongation
ENSG00000168028	RPSA	ribosomal protein SA	CHEMBL4297744	ELX-02	FALSE	2	FALSE	Reactome	Peptide chain elongation
ENSG00000168028	RPSA	ribosomal protein SA	CHEMBL4297789	MT-3724	FALSE	2	FALSE	Reactome	Peptide chain elongation
ENSG00000140988	RPS2	ribosomal protein S2	CHEMBL256997	ATALUREN	TRUE	4	FALSE	Reactome	Peptide chain elongation
ENSG00000140988	RPS2	ribosomal protein S2	CHEMBL4297744	ELX-02	FALSE	2	FALSE	Reactome	Peptide chain elongation
ENSG00000140988	RPS2	ribosomal protein S2	CHEMBL4297789	MT-3724	FALSE	2	FALSE	Reactome	Peptide chain elongation
ENSG00000182899	RPL35A	ribosomal protein L35a	CHEMBL256997	ATALUREN	TRUE	4	FALSE	Reactome	Peptide chain elongation
ENSG00000182899	RPL35A	ribosomal protein L35a	CHEMBL4297789	MT-3724	FALSE	2	FALSE	Reactome	Peptide chain elongation
ENSG00000182899	RPL35A	ribosomal protein L35a	CHEMBL4297744	ELX-02	FALSE	2	FALSE	Reactome	Peptide chain elongation
ENSG00000147604	RPL7	ribosomal protein L7	CHEMBL256997	ATALUREN	TRUE	4	FALSE	Reactome	Peptide chain elongation
ENSG00000147604	RPL7	ribosomal protein L7	CHEMBL4297744	ELX-02	FALSE	2	FALSE	Reactome	Peptide chain elongation
ENSG00000147604	RPL7	ribosomal protein L7	CHEMBL4297789	MT-3724	FALSE	2	FALSE	Reactome	Peptide chain elongation
ENSG00000265681	RPL17	ribosomal protein L17	CHEMBL256997	ATALUREN	TRUE	4	FALSE	Reactome	Peptide chain elongation
ENSG00000265681	RPL17	ribosomal protein L17	CHEMBL4297744	ELX-02	FALSE	2	FALSE	Reactome	Peptide chain elongation
ENSG00000265681	RPL17	ribosomal protein L17	CHEMBL4297789	MT-3724	FALSE	2	FALSE	Reactome	Peptide chain elongation
ENSG00000129824	RPS4Y1	ribosomal protein S4 Y-linked 1	CHEMBL256997	ATALUREN	TRUE	4	FALSE	Reactome	Peptide chain elongation
ENSG00000129824	RPS4Y1	ribosomal protein S4 Y-linked 1	CHEMBL4297744	ELX-02	FALSE	2	FALSE	Reactome	Peptide chain elongation
ENSG00000129824	RPS4Y1	ribosomal protein S4 Y-linked 1	CHEMBL4297789	MT-3724	FALSE	2	FALSE	Reactome	Peptide chain elongation
ENSG00000149273	RPS3	ribosomal protein S3	CHEMBL256997	ATALUREN	TRUE	4	FALSE	Reactome	Peptide chain elongation
ENSG00000149273	RPS3	ribosomal protein S3	CHEMBL4297789	MT-3724	FALSE	2	FALSE	Reactome	Peptide chain elongation
ENSG00000149273	RPS3	ribosomal protein S3	CHEMBL4297744	ELX-02	FALSE	2	FALSE	Reactome	Peptide chain elongation
ENSG00000112306	RPS12	ribosomal protein S12	CHEMBL256997	ATALUREN	TRUE	4	FALSE	Reactome	Peptide chain elongation
ENSG00000112306	RPS12	ribosomal protein S12	CHEMBL4297744	ELX-02	FALSE	2	FALSE	Reactome	Peptide chain elongation
ENSG00000112306	RPS12	ribosomal protein S12	CHEMBL4297789	MT-3724	FALSE	2	FALSE	Reactome	Peptide chain elongation
ENSG00000167526	RPL13	ribosomal protein L13	CHEMBL256997	ATALUREN	TRUE	4	FALSE	Reactome	Peptide chain elongation
ENSG00000167526	RPL13	ribosomal protein L13	CHEMBL4297789	MT-3724	FALSE	2	FALSE	Reactome	Peptide chain elongation
ENSG00000167526	RPL13	ribosomal protein L13	CHEMBL4297744	ELX-02	FALSE	2	FALSE	Reactome	Peptide chain elongation
ENSG00000147403	RPL10	ribosomal protein L10	CHEMBL256997	ATALUREN	TRUE	4	FALSE	Reactome	Peptide chain elongation
ENSG00000147403	RPL10	ribosomal protein L10	CHEMBL4297744	ELX-02	FALSE	2	FALSE	Reactome	Peptide chain elongation
ENSG00000147403	RPL10	ribosomal protein L10	CHEMBL4297789	MT-3724	FALSE	2	FALSE	Reactome	Peptide chain elongation
ENSG00000197958	RPL12	ribosomal protein L12	CHEMBL256997	ATALUREN	TRUE	4	FALSE	Reactome	Peptide chain elongation
ENSG00000197958	RPL12	ribosomal protein L12	CHEMBL4297744	ELX-02	FALSE	2	FALSE	Reactome	Peptide chain elongation
ENSG00000197958	RPL12	ribosomal protein L12	CHEMBL4297789	MT-3724	FALSE	2	FALSE	Reactome	Peptide chain elongation
ENSG00000163682	RPL9	ribosomal protein L9	CHEMBL256997	ATALUREN	TRUE	4	FALSE	Reactome	Peptide chain elongation
ENSG00000163682	RPL9	ribosomal protein L9	CHEMBL4297744	ELX-02	FALSE	2	FALSE	Reactome	Peptide chain elongation
ENSG00000163682	RPL9	ribosomal protein L9	CHEMBL4297789	MT-3724	FALSE	2	FALSE	Reactome	Peptide chain elongation
ENSG00000116251	RPL22	ribosomal protein L22	CHEMBL256997	ATALUREN	TRUE	4	FALSE	Reactome	Peptide chain elongation
ENSG00000116251	RPL22	ribosomal protein L22	CHEMBL4297789	MT-3724	FALSE	2	FALSE	Reactome	Peptide chain elongation
ENSG00000116251	RPL22	ribosomal protein L22	CHEMBL4297744	ELX-02	FALSE	2	FALSE	Reactome	Peptide chain elongation
ENSG00000174444	RPL4	ribosomal protein L4	CHEMBL256997	ATALUREN	TRUE	4	FALSE	Reactome	Peptide chain elongation
ENSG00000174444	RPL4	ribosomal protein L4	CHEMBL4297744	ELX-02	FALSE	2	FALSE	Reactome	Peptide chain elongation
ENSG00000174444	RPL4	ribosomal protein L4	CHEMBL4297789	MT-3724	FALSE	2	FALSE	Reactome	Peptide chain elongation
ENSG00000105372	RPS19	ribosomal protein S19	CHEMBL256997	ATALUREN	TRUE	4	FALSE	Reactome	Peptide chain elongation
ENSG00000105372	RPS19	ribosomal protein S19	CHEMBL4297744	ELX-02	FALSE	2	FALSE	Reactome	Peptide chain elongation
ENSG00000105372	RPS19	ribosomal protein S19	CHEMBL4297789	MT-3724	FALSE	2	FALSE	Reactome	Peptide chain elongation
ENSG00000100316	RPL3	ribosomal protein L3	CHEMBL256997	ATALUREN	TRUE	4	FALSE	Reactome	Peptide chain elongation
ENSG00000100316	RPL3	ribosomal protein L3	CHEMBL4297744	ELX-02	FALSE	2	FALSE	Reactome	Peptide chain elongation
ENSG00000100316	RPL3	ribosomal protein L3	CHEMBL4297789	MT-3724	FALSE	2	FALSE	Reactome	Peptide chain elongation
ENSG00000142541	RPL13A	ribosomal protein L13a	CHEMBL256997	ATALUREN	TRUE	4	FALSE	Reactome	Peptide chain elongation
ENSG00000142541	RPL13A	ribosomal protein L13a	CHEMBL4297789	MT-3724	FALSE	2	FALSE	Reactome	Peptide chain elongation
ENSG00000142541	RPL13A	ribosomal protein L13a	CHEMBL4297744	ELX-02	FALSE	2	FALSE	Reactome	Peptide chain elongation
ENSG00000177954	RPS27	ribosomal protein S27	CHEMBL256997	ATALUREN	TRUE	4	FALSE	Reactome	Peptide chain elongation
ENSG00000177954	RPS27	ribosomal protein S27	CHEMBL4297744	ELX-02	FALSE	2	FALSE	Reactome	Peptide chain elongation
ENSG00000177954	RPS27	ribosomal protein S27	CHEMBL4297789	MT-3724	FALSE	2	FALSE	Reactome	Peptide chain elongation
ENSG00000136942	RPL35	ribosomal protein L35	CHEMBL256997	ATALUREN	TRUE	4	FALSE	Reactome	Peptide chain elongation
ENSG00000136942	RPL35	ribosomal protein L35	CHEMBL4297789	MT-3724	FALSE	2	FALSE	Reactome	Peptide chain elongation
ENSG00000136942	RPL35	ribosomal protein L35	CHEMBL4297744	ELX-02	FALSE	2	FALSE	Reactome	Peptide chain elongation
ENSG00000166441	RPL27A	ribosomal protein L27a	CHEMBL256997	ATALUREN	TRUE	4	FALSE	Reactome	Peptide chain elongation
ENSG00000166441	RPL27A	ribosomal protein L27a	CHEMBL4297744	ELX-02	FALSE	2	FALSE	Reactome	Peptide chain elongation
ENSG00000166441	RPL27A	ribosomal protein L27a	CHEMBL4297789	MT-3724	FALSE	2	FALSE	Reactome	Peptide chain elongation
ENSG00000122406	RPL5	ribosomal protein L5	CHEMBL256997	ATALUREN	TRUE	4	FALSE	Reactome	Peptide chain elongation
ENSG00000122406	RPL5	ribosomal protein L5	CHEMBL4297744	ELX-02	FALSE	2	FALSE	Reactome	Peptide chain elongation
ENSG00000122406	RPL5	ribosomal protein L5	CHEMBL4297789	MT-3724	FALSE	2	FALSE	Reactome	Peptide chain elongation
ENSG00000122026	RPL21	ribosomal protein L21	CHEMBL256997	ATALUREN	TRUE	4	FALSE	Reactome	Peptide chain elongation
ENSG00000122026	RPL21	ribosomal protein L21	CHEMBL4297744	ELX-02	FALSE	2	FALSE	Reactome	Peptide chain elongation
ENSG00000122026	RPL21	ribosomal protein L21	CHEMBL4297789	MT-3724	FALSE	2	FALSE	Reactome	Peptide chain elongation
ENSG00000108107	RPL28	ribosomal protein L28	CHEMBL256997	ATALUREN	TRUE	4	FALSE	Reactome	Peptide chain elongation
ENSG00000108107	RPL28	ribosomal protein L28	CHEMBL4297744	ELX-02	FALSE	2	FALSE	Reactome	Peptide chain elongation
ENSG00000108107	RPL28	ribosomal protein L28	CHEMBL4297789	MT-3724	FALSE	2	FALSE	Reactome	Peptide chain elongation
ENSG00000083845	RPS5	ribosomal protein S5	CHEMBL256997	ATALUREN	TRUE	4	FALSE	Reactome	Peptide chain elongation
ENSG00000083845	RPS5	ribosomal protein S5	CHEMBL4297744	ELX-02	FALSE	2	FALSE	Reactome	Peptide chain elongation
ENSG00000083845	RPS5	ribosomal protein S5	CHEMBL4297789	MT-3724	FALSE	2	FALSE	Reactome	Peptide chain elongation
ENSG00000124614	RPS10	ribosomal protein S10	CHEMBL256997	ATALUREN	TRUE	4	FALSE	Reactome	Peptide chain elongation
ENSG00000124614	RPS10	ribosomal protein S10	CHEMBL4297744	ELX-02	FALSE	2	FALSE	Reactome	Peptide chain elongation
ENSG00000124614	RPS10	ribosomal protein S10	CHEMBL4297789	MT-3724	FALSE	2	FALSE	Reactome	Peptide chain elongation
ENSG00000162244	RPL29	ribosomal protein L29	CHEMBL256997	ATALUREN	TRUE	4	FALSE	Reactome	Peptide chain elongation
ENSG00000162244	RPL29	ribosomal protein L29	CHEMBL4297789	MT-3724	FALSE	2	FALSE	Reactome	Peptide chain elongation
ENSG00000162244	RPL29	ribosomal protein L29	CHEMBL4297744	ELX-02	FALSE	2	FALSE	Reactome	Peptide chain elongation
ENSG00000109475	RPL34	ribosomal protein L34	CHEMBL256997	ATALUREN	TRUE	4	FALSE	Reactome	Peptide chain elongation
ENSG00000109475	RPL34	ribosomal protein L34	CHEMBL4297789	MT-3724	FALSE	2	FALSE	Reactome	Peptide chain elongation
ENSG00000109475	RPL34	ribosomal protein L34	CHEMBL4297744	ELX-02	FALSE	2	FALSE	Reactome	Peptide chain elongation
ENSG00000188846	RPL14	ribosomal protein L14	CHEMBL256997	ATALUREN	TRUE	4	FALSE	Reactome	Peptide chain elongation
ENSG00000188846	RPL14	ribosomal protein L14	CHEMBL4297744	ELX-02	FALSE	2	FALSE	Reactome	Peptide chain elongation
ENSG00000188846	RPL14	ribosomal protein L14	CHEMBL4297789	MT-3724	FALSE	2	FALSE	Reactome	Peptide chain elongation
ENSG00000008988	RPS20	ribosomal protein S20	CHEMBL256997	ATALUREN	TRUE	4	FALSE	Reactome	Peptide chain elongation
ENSG00000008988	RPS20	ribosomal protein S20	CHEMBL4297744	ELX-02	FALSE	2	FALSE	Reactome	Peptide chain elongation
ENSG00000008988	RPS20	ribosomal protein S20	CHEMBL4297789	MT-3724	FALSE	2	FALSE	Reactome	Peptide chain elongation
ENSG00000145425	RPS3A	ribosomal protein S3A	CHEMBL256997	ATALUREN	TRUE	4	FALSE	Reactome	Peptide chain elongation
ENSG00000145425	RPS3A	ribosomal protein S3A	CHEMBL4297744	ELX-02	FALSE	2	FALSE	Reactome	Peptide chain elongation
ENSG00000145425	RPS3A	ribosomal protein S3A	CHEMBL4297789	MT-3724	FALSE	2	FALSE	Reactome	Peptide chain elongation
ENSG00000161970	RPL26	ribosomal protein L26	CHEMBL256997	ATALUREN	TRUE	4	FALSE	Reactome	Peptide chain elongation
ENSG00000161970	RPL26	ribosomal protein L26	CHEMBL4297789	MT-3724	FALSE	2	FALSE	Reactome	Peptide chain elongation
ENSG00000161970	RPL26	ribosomal protein L26	CHEMBL4297744	ELX-02	FALSE	2	FALSE	Reactome	Peptide chain elongation
ENSG00000174748	RPL15	ribosomal protein L15	CHEMBL256997	ATALUREN	TRUE	4	FALSE	Reactome	Peptide chain elongation
ENSG00000174748	RPL15	ribosomal protein L15	CHEMBL4297789	MT-3724	FALSE	2	FALSE	Reactome	Peptide chain elongation
ENSG00000174748	RPL15	ribosomal protein L15	CHEMBL4297744	ELX-02	FALSE	2	FALSE	Reactome	Peptide chain elongation
ENSG00000131469	RPL27	ribosomal protein L27	CHEMBL256997	ATALUREN	TRUE	4	FALSE	Reactome	Peptide chain elongation
ENSG00000131469	RPL27	ribosomal protein L27	CHEMBL4297744	ELX-02	FALSE	2	FALSE	Reactome	Peptide chain elongation
ENSG00000131469	RPL27	ribosomal protein L27	CHEMBL4297789	MT-3724	FALSE	2	FALSE	Reactome	Peptide chain elongation
ENSG00000197756	RPL37A	ribosomal protein L37a	CHEMBL256997	ATALUREN	TRUE	4	FALSE	Reactome	Peptide chain elongation
ENSG00000197756	RPL37A	ribosomal protein L37a	CHEMBL4297744	ELX-02	FALSE	2	FALSE	Reactome	Peptide chain elongation
ENSG00000197756	RPL37A	ribosomal protein L37a	CHEMBL4297789	MT-3724	FALSE	2	FALSE	Reactome	Peptide chain elongation
ENSG00000145592	RPL37	ribosomal protein L37	CHEMBL256997	ATALUREN	TRUE	4	FALSE	Reactome	Peptide chain elongation
ENSG00000145592	RPL37	ribosomal protein L37	CHEMBL4297744	ELX-02	FALSE	2	FALSE	Reactome	Peptide chain elongation
ENSG00000145592	RPL37	ribosomal protein L37	CHEMBL4297789	MT-3724	FALSE	2	FALSE	Reactome	Peptide chain elongation
ENSG00000171863	RPS7	ribosomal protein S7	CHEMBL256997	ATALUREN	TRUE	4	FALSE	Reactome	Peptide chain elongation
ENSG00000171863	RPS7	ribosomal protein S7	CHEMBL4297789	MT-3724	FALSE	2	FALSE	Reactome	Peptide chain elongation
ENSG00000171863	RPS7	ribosomal protein S7	CHEMBL4297744	ELX-02	FALSE	2	FALSE	Reactome	Peptide chain elongation
ENSG00000142937	RPS8	ribosomal protein S8	CHEMBL256997	ATALUREN	TRUE	4	FALSE	Reactome	Peptide chain elongation
ENSG00000142937	RPS8	ribosomal protein S8	CHEMBL4297789	MT-3724	FALSE	2	FALSE	Reactome	Peptide chain elongation
ENSG00000142937	RPS8	ribosomal protein S8	CHEMBL4297744	ELX-02	FALSE	2	FALSE	Reactome	Peptide chain elongation
ENSG00000134419	RPS15A	ribosomal protein S15a	CHEMBL256997	ATALUREN	TRUE	4	FALSE	Reactome	Peptide chain elongation
ENSG00000134419	RPS15A	ribosomal protein S15a	CHEMBL4297744	ELX-02	FALSE	2	FALSE	Reactome	Peptide chain elongation
ENSG00000134419	RPS15A	ribosomal protein S15a	CHEMBL4297789	MT-3724	FALSE	2	FALSE	Reactome	Peptide chain elongation
ENSG00000105193	RPS16	ribosomal protein S16	CHEMBL256997	ATALUREN	TRUE	4	FALSE	Reactome	Peptide chain elongation
ENSG00000105193	RPS16	ribosomal protein S16	CHEMBL4297789	MT-3724	FALSE	2	FALSE	Reactome	Peptide chain elongation
ENSG00000105193	RPS16	ribosomal protein S16	CHEMBL4297744	ELX-02	FALSE	2	FALSE	Reactome	Peptide chain elongation
ENSG00000164587	RPS14	ribosomal protein S14	CHEMBL256997	ATALUREN	TRUE	4	FALSE	Reactome	Peptide chain elongation
ENSG00000164587	RPS14	ribosomal protein S14	CHEMBL4297789	MT-3724	FALSE	2	FALSE	Reactome	Peptide chain elongation
ENSG00000164587	RPS14	ribosomal protein S14	CHEMBL4297744	ELX-02	FALSE	2	FALSE	Reactome	Peptide chain elongation
ENSG00000186468	RPS23	ribosomal protein S23	CHEMBL256997	ATALUREN	TRUE	4	FALSE	Reactome	Peptide chain elongation
ENSG00000186468	RPS23	ribosomal protein S23	CHEMBL4297744	ELX-02	FALSE	2	FALSE	Reactome	Peptide chain elongation
ENSG00000186468	RPS23	ribosomal protein S23	CHEMBL4297789	MT-3724	FALSE	2	FALSE	Reactome	Peptide chain elongation
ENSG00000213741	RPS29	ribosomal protein S29	CHEMBL256997	ATALUREN	TRUE	4	FALSE	Reactome	Peptide chain elongation
ENSG00000213741	RPS29	ribosomal protein S29	CHEMBL4297744	ELX-02	FALSE	2	FALSE	Reactome	Peptide chain elongation
ENSG00000213741	RPS29	ribosomal protein S29	CHEMBL4297789	MT-3724	FALSE	2	FALSE	Reactome	Peptide chain elongation
ENSG00000110700	RPS13	ribosomal protein S13	CHEMBL256997	ATALUREN	TRUE	4	FALSE	Reactome	Peptide chain elongation
ENSG00000110700	RPS13	ribosomal protein S13	CHEMBL4297744	ELX-02	FALSE	2	FALSE	Reactome	Peptide chain elongation
ENSG00000110700	RPS13	ribosomal protein S13	CHEMBL4297789	MT-3724	FALSE	2	FALSE	Reactome	Peptide chain elongation
ENSG00000142534	RPS11	ribosomal protein S11	CHEMBL256997	ATALUREN	TRUE	4	FALSE	Reactome	Peptide chain elongation
ENSG00000142534	RPS11	ribosomal protein S11	CHEMBL4297744	ELX-02	FALSE	2	FALSE	Reactome	Peptide chain elongation
ENSG00000142534	RPS11	ribosomal protein S11	CHEMBL4297789	MT-3724	FALSE	2	FALSE	Reactome	Peptide chain elongation
ENSG00000198034	RPS4X	ribosomal protein S4 X-linked	CHEMBL256997	ATALUREN	TRUE	4	FALSE	Reactome	Peptide chain elongation
ENSG00000198034	RPS4X	ribosomal protein S4 X-linked	CHEMBL4297744	ELX-02	FALSE	2	FALSE	Reactome	Peptide chain elongation
ENSG00000198034	RPS4X	ribosomal protein S4 X-linked	CHEMBL4297789	MT-3724	FALSE	2	FALSE	Reactome	Peptide chain elongation
ENSG00000198242	RPL23A	ribosomal protein L23a	CHEMBL256997	ATALUREN	TRUE	4	FALSE	Reactome	Peptide chain elongation
ENSG00000198242	RPL23A	ribosomal protein L23a	CHEMBL4297744	ELX-02	FALSE	2	FALSE	Reactome	Peptide chain elongation
ENSG00000198242	RPL23A	ribosomal protein L23a	CHEMBL4297789	MT-3724	FALSE	2	FALSE	Reactome	Peptide chain elongation
ENSG00000137154	RPS6	ribosomal protein S6	CHEMBL256997	ATALUREN	TRUE	4	FALSE	Reactome	Peptide chain elongation
ENSG00000137154	RPS6	ribosomal protein S6	CHEMBL4297744	ELX-02	FALSE	2	FALSE	Reactome	Peptide chain elongation
ENSG00000137154	RPS6	ribosomal protein S6	CHEMBL4297789	MT-3724	FALSE	2	FALSE	Reactome	Peptide chain elongation
ENSG00000125691	RPL23	ribosomal protein L23	CHEMBL256997	ATALUREN	TRUE	4	FALSE	Reactome	Peptide chain elongation
ENSG00000125691	RPL23	ribosomal protein L23	CHEMBL4297789	MT-3724	FALSE	2	FALSE	Reactome	Peptide chain elongation
ENSG00000125691	RPL23	ribosomal protein L23	CHEMBL4297744	ELX-02	FALSE	2	FALSE	Reactome	Peptide chain elongation
ENSG00000115268	RPS15	ribosomal protein S15	CHEMBL256997	ATALUREN	TRUE	4	FALSE	Reactome	Peptide chain elongation
ENSG00000115268	RPS15	ribosomal protein S15	CHEMBL4297744	ELX-02	FALSE	2	FALSE	Reactome	Peptide chain elongation
ENSG00000115268	RPS15	ribosomal protein S15	CHEMBL4297789	MT-3724	FALSE	2	FALSE	Reactome	Peptide chain elongation
ENSG00000138326	RPS24	ribosomal protein S24	CHEMBL256997	ATALUREN	TRUE	4	FALSE	Reactome	Peptide chain elongation
ENSG00000138326	RPS24	ribosomal protein S24	CHEMBL4297789	MT-3724	FALSE	2	FALSE	Reactome	Peptide chain elongation
ENSG00000138326	RPS24	ribosomal protein S24	CHEMBL4297744	ELX-02	FALSE	2	FALSE	Reactome	Peptide chain elongation
ENSG00000197728	RPS26	ribosomal protein S26	CHEMBL256997	ATALUREN	TRUE	4	FALSE	Reactome	Peptide chain elongation
ENSG00000197728	RPS26	ribosomal protein S26	CHEMBL4297744	ELX-02	FALSE	2	FALSE	Reactome	Peptide chain elongation
ENSG00000197728	RPS26	ribosomal protein S26	CHEMBL4297789	MT-3724	FALSE	2	FALSE	Reactome	Peptide chain elongation
ENSG00000233927	RPS28	ribosomal protein S28	CHEMBL256997	ATALUREN	TRUE	4	FALSE	Reactome	Peptide chain elongation
ENSG00000233927	RPS28	ribosomal protein S28	CHEMBL4297744	ELX-02	FALSE	2	FALSE	Reactome	Peptide chain elongation
ENSG00000233927	RPS28	ribosomal protein S28	CHEMBL4297789	MT-3724	FALSE	2	FALSE	Reactome	Peptide chain elongation
ENSG00000149806	FAU	FAU ubiquitin like and ribosomal protein S30 fusion	CHEMBL256997	ATALUREN	TRUE	4	FALSE	Reactome	Peptide chain elongation
ENSG00000149806	FAU	FAU ubiquitin like and ribosomal protein S30 fusion	CHEMBL4297744	ELX-02	FALSE	2	FALSE	Reactome	Peptide chain elongation
ENSG00000149806	FAU	FAU ubiquitin like and ribosomal protein S30 fusion	CHEMBL4297789	MT-3724	FALSE	2	FALSE	Reactome	Peptide chain elongation
ENSG00000156482	RPL30	ribosomal protein L30	CHEMBL256997	ATALUREN	TRUE	4	FALSE	Reactome	Peptide chain elongation
ENSG00000156482	RPL30	ribosomal protein L30	CHEMBL4297789	MT-3724	FALSE	2	FALSE	Reactome	Peptide chain elongation
ENSG00000156482	RPL30	ribosomal protein L30	CHEMBL4297744	ELX-02	FALSE	2	FALSE	Reactome	Peptide chain elongation
ENSG00000198918	RPL39	ribosomal protein L39	CHEMBL256997	ATALUREN	TRUE	4	FALSE	Reactome	Peptide chain elongation
ENSG00000198918	RPL39	ribosomal protein L39	CHEMBL4297744	ELX-02	FALSE	2	FALSE	Reactome	Peptide chain elongation
ENSG00000198918	RPL39	ribosomal protein L39	CHEMBL4297789	MT-3724	FALSE	2	FALSE	Reactome	Peptide chain elongation
ENSG00000071082	RPL31	ribosomal protein L31	CHEMBL256997	ATALUREN	TRUE	4	FALSE	Reactome	Peptide chain elongation
ENSG00000071082	RPL31	ribosomal protein L31	CHEMBL4297744	ELX-02	FALSE	2	FALSE	Reactome	Peptide chain elongation
ENSG00000071082	RPL31	ribosomal protein L31	CHEMBL4297789	MT-3724	FALSE	2	FALSE	Reactome	Peptide chain elongation
ENSG00000198755	RPL10A	ribosomal protein L10a	CHEMBL256997	ATALUREN	TRUE	4	FALSE	Reactome	Peptide chain elongation
ENSG00000198755	RPL10A	ribosomal protein L10a	CHEMBL4297789	MT-3724	FALSE	2	FALSE	Reactome	Peptide chain elongation
ENSG00000198755	RPL10A	ribosomal protein L10a	CHEMBL4297744	ELX-02	FALSE	2	FALSE	Reactome	Peptide chain elongation
ENSG00000144713	RPL32	ribosomal protein L32	CHEMBL256997	ATALUREN	TRUE	4	FALSE	Reactome	Peptide chain elongation
ENSG00000144713	RPL32	ribosomal protein L32	CHEMBL4297744	ELX-02	FALSE	2	FALSE	Reactome	Peptide chain elongation
ENSG00000144713	RPL32	ribosomal protein L32	CHEMBL4297789	MT-3724	FALSE	2	FALSE	Reactome	Peptide chain elongation
ENSG00000142676	RPL11	ribosomal protein L11	CHEMBL256997	ATALUREN	TRUE	4	FALSE	Reactome	Peptide chain elongation
ENSG00000142676	RPL11	ribosomal protein L11	CHEMBL4297789	MT-3724	FALSE	2	FALSE	Reactome	Peptide chain elongation
ENSG00000142676	RPL11	ribosomal protein L11	CHEMBL4297744	ELX-02	FALSE	2	FALSE	Reactome	Peptide chain elongation
ENSG00000161016	RPL8	ribosomal protein L8	CHEMBL256997	ATALUREN	TRUE	4	FALSE	Reactome	Peptide chain elongation
ENSG00000161016	RPL8	ribosomal protein L8	CHEMBL4297744	ELX-02	FALSE	2	FALSE	Reactome	Peptide chain elongation
ENSG00000161016	RPL8	ribosomal protein L8	CHEMBL4297789	MT-3724	FALSE	2	FALSE	Reactome	Peptide chain elongation
ENSG00000229117	RPL41	ribosomal protein L41	CHEMBL256997	ATALUREN	TRUE	4	FALSE	Reactome	Peptide chain elongation
ENSG00000229117	RPL41	ribosomal protein L41	CHEMBL4297744	ELX-02	FALSE	2	FALSE	Reactome	Peptide chain elongation
ENSG00000229117	RPL41	ribosomal protein L41	CHEMBL4297789	MT-3724	FALSE	2	FALSE	Reactome	Peptide chain elongation
ENSG00000143947	RPS27A	ribosomal protein S27a	CHEMBL256997	ATALUREN	TRUE	4	FALSE	Reactome	Peptide chain elongation
ENSG00000143947	RPS27A	ribosomal protein S27a	CHEMBL4297744	ELX-02	FALSE	2	FALSE	Reactome	Peptide chain elongation
ENSG00000143947	RPS27A	ribosomal protein S27a	CHEMBL4297789	MT-3724	FALSE	2	FALSE	Reactome	Peptide chain elongation
ENSG00000172809	RPL38	ribosomal protein L38	CHEMBL256997	ATALUREN	TRUE	4	FALSE	Reactome	Peptide chain elongation
ENSG00000172809	RPL38	ribosomal protein L38	CHEMBL4297744	ELX-02	FALSE	2	FALSE	Reactome	Peptide chain elongation
ENSG00000172809	RPL38	ribosomal protein L38	CHEMBL4297789	MT-3724	FALSE	2	FALSE	Reactome	Peptide chain elongation
ENSG00000171858	RPS21	ribosomal protein S21	CHEMBL256997	ATALUREN	TRUE	4	FALSE	Reactome	Peptide chain elongation
ENSG00000171858	RPS21	ribosomal protein S21	CHEMBL4297744	ELX-02	FALSE	2	FALSE	Reactome	Peptide chain elongation
ENSG00000171858	RPS21	ribosomal protein S21	CHEMBL4297789	MT-3724	FALSE	2	FALSE	Reactome	Peptide chain elongation
ENSG00000114391	RPL24	ribosomal protein L24	CHEMBL256997	ATALUREN	TRUE	4	FALSE	Reactome	Peptide chain elongation
ENSG00000114391	RPL24	ribosomal protein L24	CHEMBL4297744	ELX-02	FALSE	2	FALSE	Reactome	Peptide chain elongation
ENSG00000114391	RPL24	ribosomal protein L24	CHEMBL4297789	MT-3724	FALSE	2	FALSE	Reactome	Peptide chain elongation
ENSG00000241343	RPL36A	ribosomal protein L36a	CHEMBL256997	ATALUREN	TRUE	4	FALSE	Reactome	Peptide chain elongation
ENSG00000241343	RPL36A	ribosomal protein L36a	CHEMBL4297744	ELX-02	FALSE	2	FALSE	Reactome	Peptide chain elongation
ENSG00000241343	RPL36A	ribosomal protein L36a	CHEMBL4297789	MT-3724	FALSE	2	FALSE	Reactome	Peptide chain elongation
ENSG00000108298	RPL19	ribosomal protein L19	CHEMBL256997	ATALUREN	TRUE	4	FALSE	Reactome	Peptide chain elongation
ENSG00000108298	RPL19	ribosomal protein L19	CHEMBL4297744	ELX-02	FALSE	2	FALSE	Reactome	Peptide chain elongation
ENSG00000108298	RPL19	ribosomal protein L19	CHEMBL4297789	MT-3724	FALSE	2	FALSE	Reactome	Peptide chain elongation
ENSG00000105640	RPL18A	ribosomal protein L18a	CHEMBL256997	ATALUREN	TRUE	4	FALSE	Reactome	Peptide chain elongation
ENSG00000105640	RPL18A	ribosomal protein L18a	CHEMBL4297744	ELX-02	FALSE	2	FALSE	Reactome	Peptide chain elongation
ENSG00000105640	RPL18A	ribosomal protein L18a	CHEMBL4297789	MT-3724	FALSE	2	FALSE	Reactome	Peptide chain elongation
ENSG00000089009	RPL6	ribosomal protein L6	CHEMBL256997	ATALUREN	TRUE	4	FALSE	Reactome	Peptide chain elongation
ENSG00000089009	RPL6	ribosomal protein L6	CHEMBL4297744	ELX-02	FALSE	2	FALSE	Reactome	Peptide chain elongation
ENSG00000089009	RPL6	ribosomal protein L6	CHEMBL4297789	MT-3724	FALSE	2	FALSE	Reactome	Peptide chain elongation
ENSG00000063177	RPL18	ribosomal protein L18	CHEMBL256997	ATALUREN	TRUE	4	FALSE	Reactome	Peptide chain elongation
ENSG00000063177	RPL18	ribosomal protein L18	CHEMBL4297744	ELX-02	FALSE	2	FALSE	Reactome	Peptide chain elongation
ENSG00000063177	RPL18	ribosomal protein L18	CHEMBL4297789	MT-3724	FALSE	2	FALSE	Reactome	Peptide chain elongation
ENSG00000130255	RPL36	ribosomal protein L36	CHEMBL256997	ATALUREN	TRUE	4	FALSE	Reactome	Peptide chain elongation
ENSG00000130255	RPL36	ribosomal protein L36	CHEMBL4297744	ELX-02	FALSE	2	FALSE	Reactome	Peptide chain elongation
ENSG00000130255	RPL36	ribosomal protein L36	CHEMBL4297789	MT-3724	FALSE	2	FALSE	Reactome	Peptide chain elongation
ENSG00000109971	HSPA8	heat shock protein family A (Hsp70) member 8	CHEMBL3989409	FORIGERIMOD	FALSE	3	FALSE	Reactome	Processing of Capped Intron-Containing Pre-mRNA
ENSG00000109971	HSPA8	heat shock protein family A (Hsp70) member 8	CHEMBL3989801	FORIGERIMOD ACETATE	FALSE	3	FALSE	Reactome	Processing of Capped Intron-Containing Pre-mRNA
ENSG00000114503	NCBP2	nuclear cap binding protein subunit 2	CHEMBL4297344	ABX-464	FALSE	2	FALSE	Reactome	Processing of Capped Intron-Containing Pre-mRNA
ENSG00000136937	NCBP1	nuclear cap binding protein subunit 1	CHEMBL4297344	ABX-464	FALSE	2	FALSE	Reactome	Processing of Capped Intron-Containing Pre-mRNA
ENSG00000137818	RPLP1	ribosomal protein lateral stalk subunit P1	CHEMBL256997	ATALUREN	TRUE	4	FALSE	Reactome	Translation
ENSG00000137818	RPLP1	ribosomal protein lateral stalk subunit P1	CHEMBL4297789	MT-3724	FALSE	2	FALSE	Reactome	Translation
ENSG00000137818	RPLP1	ribosomal protein lateral stalk subunit P1	CHEMBL4297744	ELX-02	FALSE	2	FALSE	Reactome	Translation
ENSG00000089157	RPLP0	ribosomal protein lateral stalk subunit P0	CHEMBL256997	ATALUREN	TRUE	4	FALSE	Reactome	Translation
ENSG00000089157	RPLP0	ribosomal protein lateral stalk subunit P0	CHEMBL4297789	MT-3724	FALSE	2	FALSE	Reactome	Translation
ENSG00000089157	RPLP0	ribosomal protein lateral stalk subunit P0	CHEMBL4297744	ELX-02	FALSE	2	FALSE	Reactome	Translation
ENSG00000168028	RPSA	ribosomal protein SA	CHEMBL256997	ATALUREN	TRUE	4	FALSE	Reactome	Translation
ENSG00000168028	RPSA	ribosomal protein SA	CHEMBL4297744	ELX-02	FALSE	2	FALSE	Reactome	Translation
ENSG00000168028	RPSA	ribosomal protein SA	CHEMBL4297789	MT-3724	FALSE	2	FALSE	Reactome	Translation
ENSG00000140988	RPS2	ribosomal protein S2	CHEMBL256997	ATALUREN	TRUE	4	FALSE	Reactome	Translation
ENSG00000140988	RPS2	ribosomal protein S2	CHEMBL4297744	ELX-02	FALSE	2	FALSE	Reactome	Translation
ENSG00000140988	RPS2	ribosomal protein S2	CHEMBL4297789	MT-3724	FALSE	2	FALSE	Reactome	Translation
ENSG00000182899	RPL35A	ribosomal protein L35a	CHEMBL256997	ATALUREN	TRUE	4	FALSE	Reactome	Translation
ENSG00000182899	RPL35A	ribosomal protein L35a	CHEMBL4297789	MT-3724	FALSE	2	FALSE	Reactome	Translation
ENSG00000182899	RPL35A	ribosomal protein L35a	CHEMBL4297744	ELX-02	FALSE	2	FALSE	Reactome	Translation
ENSG00000147604	RPL7	ribosomal protein L7	CHEMBL256997	ATALUREN	TRUE	4	FALSE	Reactome	Translation
ENSG00000147604	RPL7	ribosomal protein L7	CHEMBL4297744	ELX-02	FALSE	2	FALSE	Reactome	Translation
ENSG00000147604	RPL7	ribosomal protein L7	CHEMBL4297789	MT-3724	FALSE	2	FALSE	Reactome	Translation
ENSG00000265681	RPL17	ribosomal protein L17	CHEMBL256997	ATALUREN	TRUE	4	FALSE	Reactome	Translation
ENSG00000265681	RPL17	ribosomal protein L17	CHEMBL4297744	ELX-02	FALSE	2	FALSE	Reactome	Translation
ENSG00000265681	RPL17	ribosomal protein L17	CHEMBL4297789	MT-3724	FALSE	2	FALSE	Reactome	Translation
ENSG00000129824	RPS4Y1	ribosomal protein S4 Y-linked 1	CHEMBL256997	ATALUREN	TRUE	4	FALSE	Reactome	Translation
ENSG00000129824	RPS4Y1	ribosomal protein S4 Y-linked 1	CHEMBL4297744	ELX-02	FALSE	2	FALSE	Reactome	Translation
ENSG00000129824	RPS4Y1	ribosomal protein S4 Y-linked 1	CHEMBL4297789	MT-3724	FALSE	2	FALSE	Reactome	Translation
ENSG00000149273	RPS3	ribosomal protein S3	CHEMBL256997	ATALUREN	TRUE	4	FALSE	Reactome	Translation
ENSG00000149273	RPS3	ribosomal protein S3	CHEMBL4297789	MT-3724	FALSE	2	FALSE	Reactome	Translation
ENSG00000149273	RPS3	ribosomal protein S3	CHEMBL4297744	ELX-02	FALSE	2	FALSE	Reactome	Translation
ENSG00000112306	RPS12	ribosomal protein S12	CHEMBL256997	ATALUREN	TRUE	4	FALSE	Reactome	Translation
ENSG00000112306	RPS12	ribosomal protein S12	CHEMBL4297744	ELX-02	FALSE	2	FALSE	Reactome	Translation
ENSG00000112306	RPS12	ribosomal protein S12	CHEMBL4297789	MT-3724	FALSE	2	FALSE	Reactome	Translation
ENSG00000167526	RPL13	ribosomal protein L13	CHEMBL256997	ATALUREN	TRUE	4	FALSE	Reactome	Translation
ENSG00000167526	RPL13	ribosomal protein L13	CHEMBL4297789	MT-3724	FALSE	2	FALSE	Reactome	Translation
ENSG00000167526	RPL13	ribosomal protein L13	CHEMBL4297744	ELX-02	FALSE	2	FALSE	Reactome	Translation
ENSG00000147403	RPL10	ribosomal protein L10	CHEMBL256997	ATALUREN	TRUE	4	FALSE	Reactome	Translation
ENSG00000147403	RPL10	ribosomal protein L10	CHEMBL4297744	ELX-02	FALSE	2	FALSE	Reactome	Translation
ENSG00000147403	RPL10	ribosomal protein L10	CHEMBL4297789	MT-3724	FALSE	2	FALSE	Reactome	Translation
ENSG00000197958	RPL12	ribosomal protein L12	CHEMBL256997	ATALUREN	TRUE	4	FALSE	Reactome	Translation
ENSG00000197958	RPL12	ribosomal protein L12	CHEMBL4297744	ELX-02	FALSE	2	FALSE	Reactome	Translation
ENSG00000197958	RPL12	ribosomal protein L12	CHEMBL4297789	MT-3724	FALSE	2	FALSE	Reactome	Translation
ENSG00000163682	RPL9	ribosomal protein L9	CHEMBL256997	ATALUREN	TRUE	4	FALSE	Reactome	Translation
ENSG00000163682	RPL9	ribosomal protein L9	CHEMBL4297744	ELX-02	FALSE	2	FALSE	Reactome	Translation
ENSG00000163682	RPL9	ribosomal protein L9	CHEMBL4297789	MT-3724	FALSE	2	FALSE	Reactome	Translation
ENSG00000116251	RPL22	ribosomal protein L22	CHEMBL256997	ATALUREN	TRUE	4	FALSE	Reactome	Translation
ENSG00000116251	RPL22	ribosomal protein L22	CHEMBL4297789	MT-3724	FALSE	2	FALSE	Reactome	Translation
ENSG00000116251	RPL22	ribosomal protein L22	CHEMBL4297744	ELX-02	FALSE	2	FALSE	Reactome	Translation
ENSG00000174444	RPL4	ribosomal protein L4	CHEMBL256997	ATALUREN	TRUE	4	FALSE	Reactome	Translation
ENSG00000174444	RPL4	ribosomal protein L4	CHEMBL4297744	ELX-02	FALSE	2	FALSE	Reactome	Translation
ENSG00000174444	RPL4	ribosomal protein L4	CHEMBL4297789	MT-3724	FALSE	2	FALSE	Reactome	Translation
ENSG00000105372	RPS19	ribosomal protein S19	CHEMBL256997	ATALUREN	TRUE	4	FALSE	Reactome	Translation
ENSG00000105372	RPS19	ribosomal protein S19	CHEMBL4297744	ELX-02	FALSE	2	FALSE	Reactome	Translation
ENSG00000105372	RPS19	ribosomal protein S19	CHEMBL4297789	MT-3724	FALSE	2	FALSE	Reactome	Translation
ENSG00000100316	RPL3	ribosomal protein L3	CHEMBL256997	ATALUREN	TRUE	4	FALSE	Reactome	Translation
ENSG00000100316	RPL3	ribosomal protein L3	CHEMBL4297744	ELX-02	FALSE	2	FALSE	Reactome	Translation
ENSG00000100316	RPL3	ribosomal protein L3	CHEMBL4297789	MT-3724	FALSE	2	FALSE	Reactome	Translation
ENSG00000142541	RPL13A	ribosomal protein L13a	CHEMBL256997	ATALUREN	TRUE	4	FALSE	Reactome	Translation
ENSG00000142541	RPL13A	ribosomal protein L13a	CHEMBL4297789	MT-3724	FALSE	2	FALSE	Reactome	Translation
ENSG00000142541	RPL13A	ribosomal protein L13a	CHEMBL4297744	ELX-02	FALSE	2	FALSE	Reactome	Translation
ENSG00000177954	RPS27	ribosomal protein S27	CHEMBL256997	ATALUREN	TRUE	4	FALSE	Reactome	Translation
ENSG00000177954	RPS27	ribosomal protein S27	CHEMBL4297744	ELX-02	FALSE	2	FALSE	Reactome	Translation
ENSG00000177954	RPS27	ribosomal protein S27	CHEMBL4297789	MT-3724	FALSE	2	FALSE	Reactome	Translation
ENSG00000136942	RPL35	ribosomal protein L35	CHEMBL256997	ATALUREN	TRUE	4	FALSE	Reactome	Translation
ENSG00000136942	RPL35	ribosomal protein L35	CHEMBL4297789	MT-3724	FALSE	2	FALSE	Reactome	Translation
ENSG00000136942	RPL35	ribosomal protein L35	CHEMBL4297744	ELX-02	FALSE	2	FALSE	Reactome	Translation
ENSG00000166441	RPL27A	ribosomal protein L27a	CHEMBL256997	ATALUREN	TRUE	4	FALSE	Reactome	Translation
ENSG00000166441	RPL27A	ribosomal protein L27a	CHEMBL4297744	ELX-02	FALSE	2	FALSE	Reactome	Translation
ENSG00000166441	RPL27A	ribosomal protein L27a	CHEMBL4297789	MT-3724	FALSE	2	FALSE	Reactome	Translation
ENSG00000122406	RPL5	ribosomal protein L5	CHEMBL256997	ATALUREN	TRUE	4	FALSE	Reactome	Translation
ENSG00000122406	RPL5	ribosomal protein L5	CHEMBL4297744	ELX-02	FALSE	2	FALSE	Reactome	Translation
ENSG00000122406	RPL5	ribosomal protein L5	CHEMBL4297789	MT-3724	FALSE	2	FALSE	Reactome	Translation
ENSG00000122026	RPL21	ribosomal protein L21	CHEMBL256997	ATALUREN	TRUE	4	FALSE	Reactome	Translation
ENSG00000122026	RPL21	ribosomal protein L21	CHEMBL4297744	ELX-02	FALSE	2	FALSE	Reactome	Translation
ENSG00000122026	RPL21	ribosomal protein L21	CHEMBL4297789	MT-3724	FALSE	2	FALSE	Reactome	Translation
ENSG00000108107	RPL28	ribosomal protein L28	CHEMBL256997	ATALUREN	TRUE	4	FALSE	Reactome	Translation
ENSG00000108107	RPL28	ribosomal protein L28	CHEMBL4297744	ELX-02	FALSE	2	FALSE	Reactome	Translation
ENSG00000108107	RPL28	ribosomal protein L28	CHEMBL4297789	MT-3724	FALSE	2	FALSE	Reactome	Translation
ENSG00000083845	RPS5	ribosomal protein S5	CHEMBL256997	ATALUREN	TRUE	4	FALSE	Reactome	Translation
ENSG00000083845	RPS5	ribosomal protein S5	CHEMBL4297744	ELX-02	FALSE	2	FALSE	Reactome	Translation
ENSG00000083845	RPS5	ribosomal protein S5	CHEMBL4297789	MT-3724	FALSE	2	FALSE	Reactome	Translation
ENSG00000124614	RPS10	ribosomal protein S10	CHEMBL256997	ATALUREN	TRUE	4	FALSE	Reactome	Translation
ENSG00000124614	RPS10	ribosomal protein S10	CHEMBL4297744	ELX-02	FALSE	2	FALSE	Reactome	Translation
ENSG00000124614	RPS10	ribosomal protein S10	CHEMBL4297789	MT-3724	FALSE	2	FALSE	Reactome	Translation
ENSG00000162244	RPL29	ribosomal protein L29	CHEMBL256997	ATALUREN	TRUE	4	FALSE	Reactome	Translation
ENSG00000162244	RPL29	ribosomal protein L29	CHEMBL4297789	MT-3724	FALSE	2	FALSE	Reactome	Translation
ENSG00000162244	RPL29	ribosomal protein L29	CHEMBL4297744	ELX-02	FALSE	2	FALSE	Reactome	Translation
ENSG00000109475	RPL34	ribosomal protein L34	CHEMBL256997	ATALUREN	TRUE	4	FALSE	Reactome	Translation
ENSG00000109475	RPL34	ribosomal protein L34	CHEMBL4297789	MT-3724	FALSE	2	FALSE	Reactome	Translation
ENSG00000109475	RPL34	ribosomal protein L34	CHEMBL4297744	ELX-02	FALSE	2	FALSE	Reactome	Translation
ENSG00000188846	RPL14	ribosomal protein L14	CHEMBL256997	ATALUREN	TRUE	4	FALSE	Reactome	Translation
ENSG00000188846	RPL14	ribosomal protein L14	CHEMBL4297744	ELX-02	FALSE	2	FALSE	Reactome	Translation
ENSG00000188846	RPL14	ribosomal protein L14	CHEMBL4297789	MT-3724	FALSE	2	FALSE	Reactome	Translation
ENSG00000008988	RPS20	ribosomal protein S20	CHEMBL256997	ATALUREN	TRUE	4	FALSE	Reactome	Translation
ENSG00000008988	RPS20	ribosomal protein S20	CHEMBL4297744	ELX-02	FALSE	2	FALSE	Reactome	Translation
ENSG00000008988	RPS20	ribosomal protein S20	CHEMBL4297789	MT-3724	FALSE	2	FALSE	Reactome	Translation
ENSG00000145425	RPS3A	ribosomal protein S3A	CHEMBL256997	ATALUREN	TRUE	4	FALSE	Reactome	Translation
ENSG00000145425	RPS3A	ribosomal protein S3A	CHEMBL4297744	ELX-02	FALSE	2	FALSE	Reactome	Translation
ENSG00000145425	RPS3A	ribosomal protein S3A	CHEMBL4297789	MT-3724	FALSE	2	FALSE	Reactome	Translation
ENSG00000161970	RPL26	ribosomal protein L26	CHEMBL256997	ATALUREN	TRUE	4	FALSE	Reactome	Translation
ENSG00000161970	RPL26	ribosomal protein L26	CHEMBL4297789	MT-3724	FALSE	2	FALSE	Reactome	Translation
ENSG00000161970	RPL26	ribosomal protein L26	CHEMBL4297744	ELX-02	FALSE	2	FALSE	Reactome	Translation
ENSG00000174748	RPL15	ribosomal protein L15	CHEMBL256997	ATALUREN	TRUE	4	FALSE	Reactome	Translation
ENSG00000174748	RPL15	ribosomal protein L15	CHEMBL4297789	MT-3724	FALSE	2	FALSE	Reactome	Translation
ENSG00000174748	RPL15	ribosomal protein L15	CHEMBL4297744	ELX-02	FALSE	2	FALSE	Reactome	Translation
ENSG00000131469	RPL27	ribosomal protein L27	CHEMBL256997	ATALUREN	TRUE	4	FALSE	Reactome	Translation
ENSG00000131469	RPL27	ribosomal protein L27	CHEMBL4297744	ELX-02	FALSE	2	FALSE	Reactome	Translation
ENSG00000131469	RPL27	ribosomal protein L27	CHEMBL4297789	MT-3724	FALSE	2	FALSE	Reactome	Translation
ENSG00000197756	RPL37A	ribosomal protein L37a	CHEMBL256997	ATALUREN	TRUE	4	FALSE	Reactome	Translation
ENSG00000197756	RPL37A	ribosomal protein L37a	CHEMBL4297744	ELX-02	FALSE	2	FALSE	Reactome	Translation
ENSG00000197756	RPL37A	ribosomal protein L37a	CHEMBL4297789	MT-3724	FALSE	2	FALSE	Reactome	Translation
ENSG00000145592	RPL37	ribosomal protein L37	CHEMBL256997	ATALUREN	TRUE	4	FALSE	Reactome	Translation
ENSG00000145592	RPL37	ribosomal protein L37	CHEMBL4297744	ELX-02	FALSE	2	FALSE	Reactome	Translation
ENSG00000145592	RPL37	ribosomal protein L37	CHEMBL4297789	MT-3724	FALSE	2	FALSE	Reactome	Translation
ENSG00000171863	RPS7	ribosomal protein S7	CHEMBL256997	ATALUREN	TRUE	4	FALSE	Reactome	Translation
ENSG00000171863	RPS7	ribosomal protein S7	CHEMBL4297789	MT-3724	FALSE	2	FALSE	Reactome	Translation
ENSG00000171863	RPS7	ribosomal protein S7	CHEMBL4297744	ELX-02	FALSE	2	FALSE	Reactome	Translation
ENSG00000142937	RPS8	ribosomal protein S8	CHEMBL256997	ATALUREN	TRUE	4	FALSE	Reactome	Translation
ENSG00000142937	RPS8	ribosomal protein S8	CHEMBL4297789	MT-3724	FALSE	2	FALSE	Reactome	Translation
ENSG00000142937	RPS8	ribosomal protein S8	CHEMBL4297744	ELX-02	FALSE	2	FALSE	Reactome	Translation
ENSG00000134419	RPS15A	ribosomal protein S15a	CHEMBL256997	ATALUREN	TRUE	4	FALSE	Reactome	Translation
ENSG00000134419	RPS15A	ribosomal protein S15a	CHEMBL4297744	ELX-02	FALSE	2	FALSE	Reactome	Translation
ENSG00000134419	RPS15A	ribosomal protein S15a	CHEMBL4297789	MT-3724	FALSE	2	FALSE	Reactome	Translation
ENSG00000105193	RPS16	ribosomal protein S16	CHEMBL256997	ATALUREN	TRUE	4	FALSE	Reactome	Translation
ENSG00000105193	RPS16	ribosomal protein S16	CHEMBL4297789	MT-3724	FALSE	2	FALSE	Reactome	Translation
ENSG00000105193	RPS16	ribosomal protein S16	CHEMBL4297744	ELX-02	FALSE	2	FALSE	Reactome	Translation
ENSG00000164587	RPS14	ribosomal protein S14	CHEMBL256997	ATALUREN	TRUE	4	FALSE	Reactome	Translation
ENSG00000164587	RPS14	ribosomal protein S14	CHEMBL4297789	MT-3724	FALSE	2	FALSE	Reactome	Translation
ENSG00000164587	RPS14	ribosomal protein S14	CHEMBL4297744	ELX-02	FALSE	2	FALSE	Reactome	Translation
ENSG00000186468	RPS23	ribosomal protein S23	CHEMBL256997	ATALUREN	TRUE	4	FALSE	Reactome	Translation
ENSG00000186468	RPS23	ribosomal protein S23	CHEMBL4297744	ELX-02	FALSE	2	FALSE	Reactome	Translation
ENSG00000186468	RPS23	ribosomal protein S23	CHEMBL4297789	MT-3724	FALSE	2	FALSE	Reactome	Translation
ENSG00000213741	RPS29	ribosomal protein S29	CHEMBL256997	ATALUREN	TRUE	4	FALSE	Reactome	Translation
ENSG00000213741	RPS29	ribosomal protein S29	CHEMBL4297744	ELX-02	FALSE	2	FALSE	Reactome	Translation
ENSG00000213741	RPS29	ribosomal protein S29	CHEMBL4297789	MT-3724	FALSE	2	FALSE	Reactome	Translation
ENSG00000110700	RPS13	ribosomal protein S13	CHEMBL256997	ATALUREN	TRUE	4	FALSE	Reactome	Translation
ENSG00000110700	RPS13	ribosomal protein S13	CHEMBL4297744	ELX-02	FALSE	2	FALSE	Reactome	Translation
ENSG00000110700	RPS13	ribosomal protein S13	CHEMBL4297789	MT-3724	FALSE	2	FALSE	Reactome	Translation
ENSG00000142534	RPS11	ribosomal protein S11	CHEMBL256997	ATALUREN	TRUE	4	FALSE	Reactome	Translation
ENSG00000142534	RPS11	ribosomal protein S11	CHEMBL4297744	ELX-02	FALSE	2	FALSE	Reactome	Translation
ENSG00000142534	RPS11	ribosomal protein S11	CHEMBL4297789	MT-3724	FALSE	2	FALSE	Reactome	Translation
ENSG00000198034	RPS4X	ribosomal protein S4 X-linked	CHEMBL256997	ATALUREN	TRUE	4	FALSE	Reactome	Translation
ENSG00000198034	RPS4X	ribosomal protein S4 X-linked	CHEMBL4297744	ELX-02	FALSE	2	FALSE	Reactome	Translation
ENSG00000198034	RPS4X	ribosomal protein S4 X-linked	CHEMBL4297789	MT-3724	FALSE	2	FALSE	Reactome	Translation
ENSG00000198242	RPL23A	ribosomal protein L23a	CHEMBL256997	ATALUREN	TRUE	4	FALSE	Reactome	Translation
ENSG00000198242	RPL23A	ribosomal protein L23a	CHEMBL4297744	ELX-02	FALSE	2	FALSE	Reactome	Translation
ENSG00000198242	RPL23A	ribosomal protein L23a	CHEMBL4297789	MT-3724	FALSE	2	FALSE	Reactome	Translation
ENSG00000137154	RPS6	ribosomal protein S6	CHEMBL256997	ATALUREN	TRUE	4	FALSE	Reactome	Translation
ENSG00000137154	RPS6	ribosomal protein S6	CHEMBL4297744	ELX-02	FALSE	2	FALSE	Reactome	Translation
ENSG00000137154	RPS6	ribosomal protein S6	CHEMBL4297789	MT-3724	FALSE	2	FALSE	Reactome	Translation
ENSG00000125691	RPL23	ribosomal protein L23	CHEMBL256997	ATALUREN	TRUE	4	FALSE	Reactome	Translation
ENSG00000125691	RPL23	ribosomal protein L23	CHEMBL4297789	MT-3724	FALSE	2	FALSE	Reactome	Translation
ENSG00000125691	RPL23	ribosomal protein L23	CHEMBL4297744	ELX-02	FALSE	2	FALSE	Reactome	Translation
ENSG00000115268	RPS15	ribosomal protein S15	CHEMBL256997	ATALUREN	TRUE	4	FALSE	Reactome	Translation
ENSG00000115268	RPS15	ribosomal protein S15	CHEMBL4297744	ELX-02	FALSE	2	FALSE	Reactome	Translation
ENSG00000115268	RPS15	ribosomal protein S15	CHEMBL4297789	MT-3724	FALSE	2	FALSE	Reactome	Translation
ENSG00000138326	RPS24	ribosomal protein S24	CHEMBL256997	ATALUREN	TRUE	4	FALSE	Reactome	Translation
ENSG00000138326	RPS24	ribosomal protein S24	CHEMBL4297789	MT-3724	FALSE	2	FALSE	Reactome	Translation
ENSG00000138326	RPS24	ribosomal protein S24	CHEMBL4297744	ELX-02	FALSE	2	FALSE	Reactome	Translation
ENSG00000197728	RPS26	ribosomal protein S26	CHEMBL256997	ATALUREN	TRUE	4	FALSE	Reactome	Translation
ENSG00000197728	RPS26	ribosomal protein S26	CHEMBL4297744	ELX-02	FALSE	2	FALSE	Reactome	Translation
ENSG00000197728	RPS26	ribosomal protein S26	CHEMBL4297789	MT-3724	FALSE	2	FALSE	Reactome	Translation
ENSG00000233927	RPS28	ribosomal protein S28	CHEMBL256997	ATALUREN	TRUE	4	FALSE	Reactome	Translation
ENSG00000233927	RPS28	ribosomal protein S28	CHEMBL4297744	ELX-02	FALSE	2	FALSE	Reactome	Translation
ENSG00000233927	RPS28	ribosomal protein S28	CHEMBL4297789	MT-3724	FALSE	2	FALSE	Reactome	Translation
ENSG00000149806	FAU	FAU ubiquitin like and ribosomal protein S30 fusion	CHEMBL256997	ATALUREN	TRUE	4	FALSE	Reactome	Translation
ENSG00000149806	FAU	FAU ubiquitin like and ribosomal protein S30 fusion	CHEMBL4297744	ELX-02	FALSE	2	FALSE	Reactome	Translation
ENSG00000149806	FAU	FAU ubiquitin like and ribosomal protein S30 fusion	CHEMBL4297789	MT-3724	FALSE	2	FALSE	Reactome	Translation
ENSG00000156482	RPL30	ribosomal protein L30	CHEMBL256997	ATALUREN	TRUE	4	FALSE	Reactome	Translation
ENSG00000156482	RPL30	ribosomal protein L30	CHEMBL4297789	MT-3724	FALSE	2	FALSE	Reactome	Translation
ENSG00000156482	RPL30	ribosomal protein L30	CHEMBL4297744	ELX-02	FALSE	2	FALSE	Reactome	Translation
ENSG00000198918	RPL39	ribosomal protein L39	CHEMBL256997	ATALUREN	TRUE	4	FALSE	Reactome	Translation
ENSG00000198918	RPL39	ribosomal protein L39	CHEMBL4297744	ELX-02	FALSE	2	FALSE	Reactome	Translation
ENSG00000198918	RPL39	ribosomal protein L39	CHEMBL4297789	MT-3724	FALSE	2	FALSE	Reactome	Translation
ENSG00000071082	RPL31	ribosomal protein L31	CHEMBL256997	ATALUREN	TRUE	4	FALSE	Reactome	Translation
ENSG00000071082	RPL31	ribosomal protein L31	CHEMBL4297744	ELX-02	FALSE	2	FALSE	Reactome	Translation
ENSG00000071082	RPL31	ribosomal protein L31	CHEMBL4297789	MT-3724	FALSE	2	FALSE	Reactome	Translation
ENSG00000198755	RPL10A	ribosomal protein L10a	CHEMBL256997	ATALUREN	TRUE	4	FALSE	Reactome	Translation
ENSG00000198755	RPL10A	ribosomal protein L10a	CHEMBL4297789	MT-3724	FALSE	2	FALSE	Reactome	Translation
ENSG00000198755	RPL10A	ribosomal protein L10a	CHEMBL4297744	ELX-02	FALSE	2	FALSE	Reactome	Translation
ENSG00000144713	RPL32	ribosomal protein L32	CHEMBL256997	ATALUREN	TRUE	4	FALSE	Reactome	Translation
ENSG00000144713	RPL32	ribosomal protein L32	CHEMBL4297744	ELX-02	FALSE	2	FALSE	Reactome	Translation
ENSG00000144713	RPL32	ribosomal protein L32	CHEMBL4297789	MT-3724	FALSE	2	FALSE	Reactome	Translation
ENSG00000142676	RPL11	ribosomal protein L11	CHEMBL256997	ATALUREN	TRUE	4	FALSE	Reactome	Translation
ENSG00000142676	RPL11	ribosomal protein L11	CHEMBL4297789	MT-3724	FALSE	2	FALSE	Reactome	Translation
ENSG00000142676	RPL11	ribosomal protein L11	CHEMBL4297744	ELX-02	FALSE	2	FALSE	Reactome	Translation
ENSG00000161016	RPL8	ribosomal protein L8	CHEMBL256997	ATALUREN	TRUE	4	FALSE	Reactome	Translation
ENSG00000161016	RPL8	ribosomal protein L8	CHEMBL4297744	ELX-02	FALSE	2	FALSE	Reactome	Translation
ENSG00000161016	RPL8	ribosomal protein L8	CHEMBL4297789	MT-3724	FALSE	2	FALSE	Reactome	Translation
ENSG00000229117	RPL41	ribosomal protein L41	CHEMBL256997	ATALUREN	TRUE	4	FALSE	Reactome	Translation
ENSG00000229117	RPL41	ribosomal protein L41	CHEMBL4297744	ELX-02	FALSE	2	FALSE	Reactome	Translation
ENSG00000229117	RPL41	ribosomal protein L41	CHEMBL4297789	MT-3724	FALSE	2	FALSE	Reactome	Translation
ENSG00000143947	RPS27A	ribosomal protein S27a	CHEMBL256997	ATALUREN	TRUE	4	FALSE	Reactome	Translation
ENSG00000143947	RPS27A	ribosomal protein S27a	CHEMBL4297744	ELX-02	FALSE	2	FALSE	Reactome	Translation
ENSG00000143947	RPS27A	ribosomal protein S27a	CHEMBL4297789	MT-3724	FALSE	2	FALSE	Reactome	Translation
ENSG00000172809	RPL38	ribosomal protein L38	CHEMBL256997	ATALUREN	TRUE	4	FALSE	Reactome	Translation
ENSG00000172809	RPL38	ribosomal protein L38	CHEMBL4297744	ELX-02	FALSE	2	FALSE	Reactome	Translation
ENSG00000172809	RPL38	ribosomal protein L38	CHEMBL4297789	MT-3724	FALSE	2	FALSE	Reactome	Translation
ENSG00000171858	RPS21	ribosomal protein S21	CHEMBL256997	ATALUREN	TRUE	4	FALSE	Reactome	Translation
ENSG00000171858	RPS21	ribosomal protein S21	CHEMBL4297744	ELX-02	FALSE	2	FALSE	Reactome	Translation
ENSG00000171858	RPS21	ribosomal protein S21	CHEMBL4297789	MT-3724	FALSE	2	FALSE	Reactome	Translation
ENSG00000114391	RPL24	ribosomal protein L24	CHEMBL256997	ATALUREN	TRUE	4	FALSE	Reactome	Translation
ENSG00000114391	RPL24	ribosomal protein L24	CHEMBL4297744	ELX-02	FALSE	2	FALSE	Reactome	Translation
ENSG00000114391	RPL24	ribosomal protein L24	CHEMBL4297789	MT-3724	FALSE	2	FALSE	Reactome	Translation
ENSG00000241343	RPL36A	ribosomal protein L36a	CHEMBL256997	ATALUREN	TRUE	4	FALSE	Reactome	Translation
ENSG00000241343	RPL36A	ribosomal protein L36a	CHEMBL4297744	ELX-02	FALSE	2	FALSE	Reactome	Translation
ENSG00000241343	RPL36A	ribosomal protein L36a	CHEMBL4297789	MT-3724	FALSE	2	FALSE	Reactome	Translation
ENSG00000108298	RPL19	ribosomal protein L19	CHEMBL256997	ATALUREN	TRUE	4	FALSE	Reactome	Translation
ENSG00000108298	RPL19	ribosomal protein L19	CHEMBL4297744	ELX-02	FALSE	2	FALSE	Reactome	Translation
ENSG00000108298	RPL19	ribosomal protein L19	CHEMBL4297789	MT-3724	FALSE	2	FALSE	Reactome	Translation
ENSG00000105640	RPL18A	ribosomal protein L18a	CHEMBL256997	ATALUREN	TRUE	4	FALSE	Reactome	Translation
ENSG00000105640	RPL18A	ribosomal protein L18a	CHEMBL4297744	ELX-02	FALSE	2	FALSE	Reactome	Translation
ENSG00000105640	RPL18A	ribosomal protein L18a	CHEMBL4297789	MT-3724	FALSE	2	FALSE	Reactome	Translation
ENSG00000089009	RPL6	ribosomal protein L6	CHEMBL256997	ATALUREN	TRUE	4	FALSE	Reactome	Translation
ENSG00000089009	RPL6	ribosomal protein L6	CHEMBL4297744	ELX-02	FALSE	2	FALSE	Reactome	Translation
ENSG00000089009	RPL6	ribosomal protein L6	CHEMBL4297789	MT-3724	FALSE	2	FALSE	Reactome	Translation
ENSG00000101210	EEF1A2	eukaryotic translation elongation factor 1 alpha 2	CHEMBL451930	PLITIDEPSIN	FALSE	3	FALSE	Reactome	Translation
ENSG00000063177	RPL18	ribosomal protein L18	CHEMBL256997	ATALUREN	TRUE	4	FALSE	Reactome	Translation
ENSG00000063177	RPL18	ribosomal protein L18	CHEMBL4297744	ELX-02	FALSE	2	FALSE	Reactome	Translation
ENSG00000063177	RPL18	ribosomal protein L18	CHEMBL4297789	MT-3724	FALSE	2	FALSE	Reactome	Translation
ENSG00000130255	RPL36	ribosomal protein L36	CHEMBL256997	ATALUREN	TRUE	4	FALSE	Reactome	Translation
ENSG00000130255	RPL36	ribosomal protein L36	CHEMBL4297744	ELX-02	FALSE	2	FALSE	Reactome	Translation
ENSG00000130255	RPL36	ribosomal protein L36	CHEMBL4297789	MT-3724	FALSE	2	FALSE	Reactome	Translation
ENSG00000114503	NCBP2	nuclear cap binding protein subunit 2	CHEMBL4297344	ABX-464	FALSE	2	FALSE	Reactome	Non-coding RNA Metabolism
ENSG00000136937	NCBP1	nuclear cap binding protein subunit 1	CHEMBL4297344	ABX-464	FALSE	2	FALSE	Reactome	Non-coding RNA Metabolism
ENSG00000114503	NCBP2	nuclear cap binding protein subunit 2	CHEMBL4297344	ABX-464	FALSE	2	FALSE	Reactome	snRNP Assembly
ENSG00000136937	NCBP1	nuclear cap binding protein subunit 1	CHEMBL4297344	ABX-464	FALSE	2	FALSE	Reactome	snRNP Assembly
ENSG00000114503	NCBP2	nuclear cap binding protein subunit 2	CHEMBL4297344	ABX-464	FALSE	2	FALSE	Reactome	Transport of Mature Transcript to Cytoplasm
ENSG00000136937	NCBP1	nuclear cap binding protein subunit 1	CHEMBL4297344	ABX-464	FALSE	2	FALSE	Reactome	Transport of Mature Transcript to Cytoplasm
ENSG00000109971	HSPA8	heat shock protein family A (Hsp70) member 8	CHEMBL3989409	FORIGERIMOD	FALSE	3	FALSE	Reactome	mRNA Splicing
ENSG00000109971	HSPA8	heat shock protein family A (Hsp70) member 8	CHEMBL3989801	FORIGERIMOD ACETATE	FALSE	3	FALSE	Reactome	mRNA Splicing
ENSG00000114503	NCBP2	nuclear cap binding protein subunit 2	CHEMBL4297344	ABX-464	FALSE	2	FALSE	Reactome	mRNA Splicing
ENSG00000136937	NCBP1	nuclear cap binding protein subunit 1	CHEMBL4297344	ABX-464	FALSE	2	FALSE	Reactome	mRNA Splicing
ENSG00000109971	HSPA8	heat shock protein family A (Hsp70) member 8	CHEMBL3989409	FORIGERIMOD	FALSE	3	FALSE	Reactome	pre-mRNA splicing
ENSG00000109971	HSPA8	heat shock protein family A (Hsp70) member 8	CHEMBL3989801	FORIGERIMOD ACETATE	FALSE	3	FALSE	Reactome	pre-mRNA splicing
ENSG00000114503	NCBP2	nuclear cap binding protein subunit 2	CHEMBL4297344	ABX-464	FALSE	2	FALSE	Reactome	pre-mRNA splicing
ENSG00000136937	NCBP1	nuclear cap binding protein subunit 1	CHEMBL4297344	ABX-464	FALSE	2	FALSE	Reactome	pre-mRNA splicing
ENSG00000137818	RPLP1	ribosomal protein lateral stalk subunit P1	CHEMBL256997	ATALUREN	TRUE	4	FALSE	Reactome	Nonsense-Mediated Decay (NMD)
ENSG00000137818	RPLP1	ribosomal protein lateral stalk subunit P1	CHEMBL4297789	MT-3724	FALSE	2	FALSE	Reactome	Nonsense-Mediated Decay (NMD)
ENSG00000137818	RPLP1	ribosomal protein lateral stalk subunit P1	CHEMBL4297744	ELX-02	FALSE	2	FALSE	Reactome	Nonsense-Mediated Decay (NMD)
ENSG00000089157	RPLP0	ribosomal protein lateral stalk subunit P0	CHEMBL256997	ATALUREN	TRUE	4	FALSE	Reactome	Nonsense-Mediated Decay (NMD)
ENSG00000089157	RPLP0	ribosomal protein lateral stalk subunit P0	CHEMBL4297789	MT-3724	FALSE	2	FALSE	Reactome	Nonsense-Mediated Decay (NMD)
ENSG00000089157	RPLP0	ribosomal protein lateral stalk subunit P0	CHEMBL4297744	ELX-02	FALSE	2	FALSE	Reactome	Nonsense-Mediated Decay (NMD)
ENSG00000168028	RPSA	ribosomal protein SA	CHEMBL256997	ATALUREN	TRUE	4	FALSE	Reactome	Nonsense-Mediated Decay (NMD)
ENSG00000168028	RPSA	ribosomal protein SA	CHEMBL4297744	ELX-02	FALSE	2	FALSE	Reactome	Nonsense-Mediated Decay (NMD)
ENSG00000168028	RPSA	ribosomal protein SA	CHEMBL4297789	MT-3724	FALSE	2	FALSE	Reactome	Nonsense-Mediated Decay (NMD)
ENSG00000140988	RPS2	ribosomal protein S2	CHEMBL256997	ATALUREN	TRUE	4	FALSE	Reactome	Nonsense-Mediated Decay (NMD)
ENSG00000140988	RPS2	ribosomal protein S2	CHEMBL4297744	ELX-02	FALSE	2	FALSE	Reactome	Nonsense-Mediated Decay (NMD)
ENSG00000140988	RPS2	ribosomal protein S2	CHEMBL4297789	MT-3724	FALSE	2	FALSE	Reactome	Nonsense-Mediated Decay (NMD)
ENSG00000182899	RPL35A	ribosomal protein L35a	CHEMBL256997	ATALUREN	TRUE	4	FALSE	Reactome	Nonsense-Mediated Decay (NMD)
ENSG00000182899	RPL35A	ribosomal protein L35a	CHEMBL4297789	MT-3724	FALSE	2	FALSE	Reactome	Nonsense-Mediated Decay (NMD)
ENSG00000182899	RPL35A	ribosomal protein L35a	CHEMBL4297744	ELX-02	FALSE	2	FALSE	Reactome	Nonsense-Mediated Decay (NMD)
ENSG00000147604	RPL7	ribosomal protein L7	CHEMBL256997	ATALUREN	TRUE	4	FALSE	Reactome	Nonsense-Mediated Decay (NMD)
ENSG00000147604	RPL7	ribosomal protein L7	CHEMBL4297744	ELX-02	FALSE	2	FALSE	Reactome	Nonsense-Mediated Decay (NMD)
ENSG00000147604	RPL7	ribosomal protein L7	CHEMBL4297789	MT-3724	FALSE	2	FALSE	Reactome	Nonsense-Mediated Decay (NMD)
ENSG00000265681	RPL17	ribosomal protein L17	CHEMBL256997	ATALUREN	TRUE	4	FALSE	Reactome	Nonsense-Mediated Decay (NMD)
ENSG00000265681	RPL17	ribosomal protein L17	CHEMBL4297744	ELX-02	FALSE	2	FALSE	Reactome	Nonsense-Mediated Decay (NMD)
ENSG00000265681	RPL17	ribosomal protein L17	CHEMBL4297789	MT-3724	FALSE	2	FALSE	Reactome	Nonsense-Mediated Decay (NMD)
ENSG00000129824	RPS4Y1	ribosomal protein S4 Y-linked 1	CHEMBL256997	ATALUREN	TRUE	4	FALSE	Reactome	Nonsense-Mediated Decay (NMD)
ENSG00000129824	RPS4Y1	ribosomal protein S4 Y-linked 1	CHEMBL4297744	ELX-02	FALSE	2	FALSE	Reactome	Nonsense-Mediated Decay (NMD)
ENSG00000129824	RPS4Y1	ribosomal protein S4 Y-linked 1	CHEMBL4297789	MT-3724	FALSE	2	FALSE	Reactome	Nonsense-Mediated Decay (NMD)
ENSG00000149273	RPS3	ribosomal protein S3	CHEMBL256997	ATALUREN	TRUE	4	FALSE	Reactome	Nonsense-Mediated Decay (NMD)
ENSG00000149273	RPS3	ribosomal protein S3	CHEMBL4297789	MT-3724	FALSE	2	FALSE	Reactome	Nonsense-Mediated Decay (NMD)
ENSG00000149273	RPS3	ribosomal protein S3	CHEMBL4297744	ELX-02	FALSE	2	FALSE	Reactome	Nonsense-Mediated Decay (NMD)
ENSG00000112306	RPS12	ribosomal protein S12	CHEMBL256997	ATALUREN	TRUE	4	FALSE	Reactome	Nonsense-Mediated Decay (NMD)
ENSG00000112306	RPS12	ribosomal protein S12	CHEMBL4297744	ELX-02	FALSE	2	FALSE	Reactome	Nonsense-Mediated Decay (NMD)
ENSG00000112306	RPS12	ribosomal protein S12	CHEMBL4297789	MT-3724	FALSE	2	FALSE	Reactome	Nonsense-Mediated Decay (NMD)
ENSG00000167526	RPL13	ribosomal protein L13	CHEMBL256997	ATALUREN	TRUE	4	FALSE	Reactome	Nonsense-Mediated Decay (NMD)
ENSG00000167526	RPL13	ribosomal protein L13	CHEMBL4297789	MT-3724	FALSE	2	FALSE	Reactome	Nonsense-Mediated Decay (NMD)
ENSG00000167526	RPL13	ribosomal protein L13	CHEMBL4297744	ELX-02	FALSE	2	FALSE	Reactome	Nonsense-Mediated Decay (NMD)
ENSG00000147403	RPL10	ribosomal protein L10	CHEMBL256997	ATALUREN	TRUE	4	FALSE	Reactome	Nonsense-Mediated Decay (NMD)
ENSG00000147403	RPL10	ribosomal protein L10	CHEMBL4297744	ELX-02	FALSE	2	FALSE	Reactome	Nonsense-Mediated Decay (NMD)
ENSG00000147403	RPL10	ribosomal protein L10	CHEMBL4297789	MT-3724	FALSE	2	FALSE	Reactome	Nonsense-Mediated Decay (NMD)
ENSG00000197958	RPL12	ribosomal protein L12	CHEMBL256997	ATALUREN	TRUE	4	FALSE	Reactome	Nonsense-Mediated Decay (NMD)
ENSG00000197958	RPL12	ribosomal protein L12	CHEMBL4297744	ELX-02	FALSE	2	FALSE	Reactome	Nonsense-Mediated Decay (NMD)
ENSG00000197958	RPL12	ribosomal protein L12	CHEMBL4297789	MT-3724	FALSE	2	FALSE	Reactome	Nonsense-Mediated Decay (NMD)
ENSG00000163682	RPL9	ribosomal protein L9	CHEMBL256997	ATALUREN	TRUE	4	FALSE	Reactome	Nonsense-Mediated Decay (NMD)
ENSG00000163682	RPL9	ribosomal protein L9	CHEMBL4297744	ELX-02	FALSE	2	FALSE	Reactome	Nonsense-Mediated Decay (NMD)
ENSG00000163682	RPL9	ribosomal protein L9	CHEMBL4297789	MT-3724	FALSE	2	FALSE	Reactome	Nonsense-Mediated Decay (NMD)
ENSG00000116251	RPL22	ribosomal protein L22	CHEMBL256997	ATALUREN	TRUE	4	FALSE	Reactome	Nonsense-Mediated Decay (NMD)
ENSG00000116251	RPL22	ribosomal protein L22	CHEMBL4297789	MT-3724	FALSE	2	FALSE	Reactome	Nonsense-Mediated Decay (NMD)
ENSG00000116251	RPL22	ribosomal protein L22	CHEMBL4297744	ELX-02	FALSE	2	FALSE	Reactome	Nonsense-Mediated Decay (NMD)
ENSG00000174444	RPL4	ribosomal protein L4	CHEMBL256997	ATALUREN	TRUE	4	FALSE	Reactome	Nonsense-Mediated Decay (NMD)
ENSG00000174444	RPL4	ribosomal protein L4	CHEMBL4297744	ELX-02	FALSE	2	FALSE	Reactome	Nonsense-Mediated Decay (NMD)
ENSG00000174444	RPL4	ribosomal protein L4	CHEMBL4297789	MT-3724	FALSE	2	FALSE	Reactome	Nonsense-Mediated Decay (NMD)
ENSG00000105372	RPS19	ribosomal protein S19	CHEMBL256997	ATALUREN	TRUE	4	FALSE	Reactome	Nonsense-Mediated Decay (NMD)
ENSG00000105372	RPS19	ribosomal protein S19	CHEMBL4297744	ELX-02	FALSE	2	FALSE	Reactome	Nonsense-Mediated Decay (NMD)
ENSG00000105372	RPS19	ribosomal protein S19	CHEMBL4297789	MT-3724	FALSE	2	FALSE	Reactome	Nonsense-Mediated Decay (NMD)
ENSG00000100316	RPL3	ribosomal protein L3	CHEMBL256997	ATALUREN	TRUE	4	FALSE	Reactome	Nonsense-Mediated Decay (NMD)
ENSG00000100316	RPL3	ribosomal protein L3	CHEMBL4297744	ELX-02	FALSE	2	FALSE	Reactome	Nonsense-Mediated Decay (NMD)
ENSG00000100316	RPL3	ribosomal protein L3	CHEMBL4297789	MT-3724	FALSE	2	FALSE	Reactome	Nonsense-Mediated Decay (NMD)
ENSG00000142541	RPL13A	ribosomal protein L13a	CHEMBL256997	ATALUREN	TRUE	4	FALSE	Reactome	Nonsense-Mediated Decay (NMD)
ENSG00000142541	RPL13A	ribosomal protein L13a	CHEMBL4297789	MT-3724	FALSE	2	FALSE	Reactome	Nonsense-Mediated Decay (NMD)
ENSG00000142541	RPL13A	ribosomal protein L13a	CHEMBL4297744	ELX-02	FALSE	2	FALSE	Reactome	Nonsense-Mediated Decay (NMD)
ENSG00000177954	RPS27	ribosomal protein S27	CHEMBL256997	ATALUREN	TRUE	4	FALSE	Reactome	Nonsense-Mediated Decay (NMD)
ENSG00000177954	RPS27	ribosomal protein S27	CHEMBL4297744	ELX-02	FALSE	2	FALSE	Reactome	Nonsense-Mediated Decay (NMD)
ENSG00000177954	RPS27	ribosomal protein S27	CHEMBL4297789	MT-3724	FALSE	2	FALSE	Reactome	Nonsense-Mediated Decay (NMD)
ENSG00000136942	RPL35	ribosomal protein L35	CHEMBL256997	ATALUREN	TRUE	4	FALSE	Reactome	Nonsense-Mediated Decay (NMD)
ENSG00000136942	RPL35	ribosomal protein L35	CHEMBL4297789	MT-3724	FALSE	2	FALSE	Reactome	Nonsense-Mediated Decay (NMD)
ENSG00000136942	RPL35	ribosomal protein L35	CHEMBL4297744	ELX-02	FALSE	2	FALSE	Reactome	Nonsense-Mediated Decay (NMD)
ENSG00000166441	RPL27A	ribosomal protein L27a	CHEMBL256997	ATALUREN	TRUE	4	FALSE	Reactome	Nonsense-Mediated Decay (NMD)
ENSG00000166441	RPL27A	ribosomal protein L27a	CHEMBL4297744	ELX-02	FALSE	2	FALSE	Reactome	Nonsense-Mediated Decay (NMD)
ENSG00000166441	RPL27A	ribosomal protein L27a	CHEMBL4297789	MT-3724	FALSE	2	FALSE	Reactome	Nonsense-Mediated Decay (NMD)
ENSG00000122406	RPL5	ribosomal protein L5	CHEMBL256997	ATALUREN	TRUE	4	FALSE	Reactome	Nonsense-Mediated Decay (NMD)
ENSG00000122406	RPL5	ribosomal protein L5	CHEMBL4297744	ELX-02	FALSE	2	FALSE	Reactome	Nonsense-Mediated Decay (NMD)
ENSG00000122406	RPL5	ribosomal protein L5	CHEMBL4297789	MT-3724	FALSE	2	FALSE	Reactome	Nonsense-Mediated Decay (NMD)
ENSG00000122026	RPL21	ribosomal protein L21	CHEMBL256997	ATALUREN	TRUE	4	FALSE	Reactome	Nonsense-Mediated Decay (NMD)
ENSG00000122026	RPL21	ribosomal protein L21	CHEMBL4297744	ELX-02	FALSE	2	FALSE	Reactome	Nonsense-Mediated Decay (NMD)
ENSG00000122026	RPL21	ribosomal protein L21	CHEMBL4297789	MT-3724	FALSE	2	FALSE	Reactome	Nonsense-Mediated Decay (NMD)
ENSG00000108107	RPL28	ribosomal protein L28	CHEMBL256997	ATALUREN	TRUE	4	FALSE	Reactome	Nonsense-Mediated Decay (NMD)
ENSG00000108107	RPL28	ribosomal protein L28	CHEMBL4297744	ELX-02	FALSE	2	FALSE	Reactome	Nonsense-Mediated Decay (NMD)
ENSG00000108107	RPL28	ribosomal protein L28	CHEMBL4297789	MT-3724	FALSE	2	FALSE	Reactome	Nonsense-Mediated Decay (NMD)
ENSG00000083845	RPS5	ribosomal protein S5	CHEMBL256997	ATALUREN	TRUE	4	FALSE	Reactome	Nonsense-Mediated Decay (NMD)
ENSG00000083845	RPS5	ribosomal protein S5	CHEMBL4297744	ELX-02	FALSE	2	FALSE	Reactome	Nonsense-Mediated Decay (NMD)
ENSG00000083845	RPS5	ribosomal protein S5	CHEMBL4297789	MT-3724	FALSE	2	FALSE	Reactome	Nonsense-Mediated Decay (NMD)
ENSG00000124614	RPS10	ribosomal protein S10	CHEMBL256997	ATALUREN	TRUE	4	FALSE	Reactome	Nonsense-Mediated Decay (NMD)
ENSG00000124614	RPS10	ribosomal protein S10	CHEMBL4297744	ELX-02	FALSE	2	FALSE	Reactome	Nonsense-Mediated Decay (NMD)
ENSG00000124614	RPS10	ribosomal protein S10	CHEMBL4297789	MT-3724	FALSE	2	FALSE	Reactome	Nonsense-Mediated Decay (NMD)
ENSG00000162244	RPL29	ribosomal protein L29	CHEMBL256997	ATALUREN	TRUE	4	FALSE	Reactome	Nonsense-Mediated Decay (NMD)
ENSG00000162244	RPL29	ribosomal protein L29	CHEMBL4297789	MT-3724	FALSE	2	FALSE	Reactome	Nonsense-Mediated Decay (NMD)
ENSG00000162244	RPL29	ribosomal protein L29	CHEMBL4297744	ELX-02	FALSE	2	FALSE	Reactome	Nonsense-Mediated Decay (NMD)
ENSG00000109475	RPL34	ribosomal protein L34	CHEMBL256997	ATALUREN	TRUE	4	FALSE	Reactome	Nonsense-Mediated Decay (NMD)
ENSG00000109475	RPL34	ribosomal protein L34	CHEMBL4297789	MT-3724	FALSE	2	FALSE	Reactome	Nonsense-Mediated Decay (NMD)
ENSG00000109475	RPL34	ribosomal protein L34	CHEMBL4297744	ELX-02	FALSE	2	FALSE	Reactome	Nonsense-Mediated Decay (NMD)
ENSG00000188846	RPL14	ribosomal protein L14	CHEMBL256997	ATALUREN	TRUE	4	FALSE	Reactome	Nonsense-Mediated Decay (NMD)
ENSG00000188846	RPL14	ribosomal protein L14	CHEMBL4297744	ELX-02	FALSE	2	FALSE	Reactome	Nonsense-Mediated Decay (NMD)
ENSG00000188846	RPL14	ribosomal protein L14	CHEMBL4297789	MT-3724	FALSE	2	FALSE	Reactome	Nonsense-Mediated Decay (NMD)
ENSG00000114503	NCBP2	nuclear cap binding protein subunit 2	CHEMBL4297344	ABX-464	FALSE	2	FALSE	Reactome	Nonsense-Mediated Decay (NMD)
ENSG00000008988	RPS20	ribosomal protein S20	CHEMBL256997	ATALUREN	TRUE	4	FALSE	Reactome	Nonsense-Mediated Decay (NMD)
ENSG00000008988	RPS20	ribosomal protein S20	CHEMBL4297744	ELX-02	FALSE	2	FALSE	Reactome	Nonsense-Mediated Decay (NMD)
ENSG00000008988	RPS20	ribosomal protein S20	CHEMBL4297789	MT-3724	FALSE	2	FALSE	Reactome	Nonsense-Mediated Decay (NMD)
ENSG00000145425	RPS3A	ribosomal protein S3A	CHEMBL256997	ATALUREN	TRUE	4	FALSE	Reactome	Nonsense-Mediated Decay (NMD)
ENSG00000145425	RPS3A	ribosomal protein S3A	CHEMBL4297744	ELX-02	FALSE	2	FALSE	Reactome	Nonsense-Mediated Decay (NMD)
ENSG00000145425	RPS3A	ribosomal protein S3A	CHEMBL4297789	MT-3724	FALSE	2	FALSE	Reactome	Nonsense-Mediated Decay (NMD)
ENSG00000161970	RPL26	ribosomal protein L26	CHEMBL256997	ATALUREN	TRUE	4	FALSE	Reactome	Nonsense-Mediated Decay (NMD)
ENSG00000161970	RPL26	ribosomal protein L26	CHEMBL4297789	MT-3724	FALSE	2	FALSE	Reactome	Nonsense-Mediated Decay (NMD)
ENSG00000161970	RPL26	ribosomal protein L26	CHEMBL4297744	ELX-02	FALSE	2	FALSE	Reactome	Nonsense-Mediated Decay (NMD)
ENSG00000174748	RPL15	ribosomal protein L15	CHEMBL256997	ATALUREN	TRUE	4	FALSE	Reactome	Nonsense-Mediated Decay (NMD)
ENSG00000174748	RPL15	ribosomal protein L15	CHEMBL4297789	MT-3724	FALSE	2	FALSE	Reactome	Nonsense-Mediated Decay (NMD)
ENSG00000174748	RPL15	ribosomal protein L15	CHEMBL4297744	ELX-02	FALSE	2	FALSE	Reactome	Nonsense-Mediated Decay (NMD)
ENSG00000131469	RPL27	ribosomal protein L27	CHEMBL256997	ATALUREN	TRUE	4	FALSE	Reactome	Nonsense-Mediated Decay (NMD)
ENSG00000131469	RPL27	ribosomal protein L27	CHEMBL4297744	ELX-02	FALSE	2	FALSE	Reactome	Nonsense-Mediated Decay (NMD)
ENSG00000131469	RPL27	ribosomal protein L27	CHEMBL4297789	MT-3724	FALSE	2	FALSE	Reactome	Nonsense-Mediated Decay (NMD)
ENSG00000197756	RPL37A	ribosomal protein L37a	CHEMBL256997	ATALUREN	TRUE	4	FALSE	Reactome	Nonsense-Mediated Decay (NMD)
ENSG00000197756	RPL37A	ribosomal protein L37a	CHEMBL4297744	ELX-02	FALSE	2	FALSE	Reactome	Nonsense-Mediated Decay (NMD)
ENSG00000197756	RPL37A	ribosomal protein L37a	CHEMBL4297789	MT-3724	FALSE	2	FALSE	Reactome	Nonsense-Mediated Decay (NMD)
ENSG00000145592	RPL37	ribosomal protein L37	CHEMBL256997	ATALUREN	TRUE	4	FALSE	Reactome	Nonsense-Mediated Decay (NMD)
ENSG00000145592	RPL37	ribosomal protein L37	CHEMBL4297744	ELX-02	FALSE	2	FALSE	Reactome	Nonsense-Mediated Decay (NMD)
ENSG00000145592	RPL37	ribosomal protein L37	CHEMBL4297789	MT-3724	FALSE	2	FALSE	Reactome	Nonsense-Mediated Decay (NMD)
ENSG00000171863	RPS7	ribosomal protein S7	CHEMBL256997	ATALUREN	TRUE	4	FALSE	Reactome	Nonsense-Mediated Decay (NMD)
ENSG00000171863	RPS7	ribosomal protein S7	CHEMBL4297789	MT-3724	FALSE	2	FALSE	Reactome	Nonsense-Mediated Decay (NMD)
ENSG00000171863	RPS7	ribosomal protein S7	CHEMBL4297744	ELX-02	FALSE	2	FALSE	Reactome	Nonsense-Mediated Decay (NMD)
ENSG00000142937	RPS8	ribosomal protein S8	CHEMBL256997	ATALUREN	TRUE	4	FALSE	Reactome	Nonsense-Mediated Decay (NMD)
ENSG00000142937	RPS8	ribosomal protein S8	CHEMBL4297789	MT-3724	FALSE	2	FALSE	Reactome	Nonsense-Mediated Decay (NMD)
ENSG00000142937	RPS8	ribosomal protein S8	CHEMBL4297744	ELX-02	FALSE	2	FALSE	Reactome	Nonsense-Mediated Decay (NMD)
ENSG00000134419	RPS15A	ribosomal protein S15a	CHEMBL256997	ATALUREN	TRUE	4	FALSE	Reactome	Nonsense-Mediated Decay (NMD)
ENSG00000134419	RPS15A	ribosomal protein S15a	CHEMBL4297744	ELX-02	FALSE	2	FALSE	Reactome	Nonsense-Mediated Decay (NMD)
ENSG00000134419	RPS15A	ribosomal protein S15a	CHEMBL4297789	MT-3724	FALSE	2	FALSE	Reactome	Nonsense-Mediated Decay (NMD)
ENSG00000105193	RPS16	ribosomal protein S16	CHEMBL256997	ATALUREN	TRUE	4	FALSE	Reactome	Nonsense-Mediated Decay (NMD)
ENSG00000105193	RPS16	ribosomal protein S16	CHEMBL4297789	MT-3724	FALSE	2	FALSE	Reactome	Nonsense-Mediated Decay (NMD)
ENSG00000105193	RPS16	ribosomal protein S16	CHEMBL4297744	ELX-02	FALSE	2	FALSE	Reactome	Nonsense-Mediated Decay (NMD)
ENSG00000164587	RPS14	ribosomal protein S14	CHEMBL256997	ATALUREN	TRUE	4	FALSE	Reactome	Nonsense-Mediated Decay (NMD)
ENSG00000164587	RPS14	ribosomal protein S14	CHEMBL4297789	MT-3724	FALSE	2	FALSE	Reactome	Nonsense-Mediated Decay (NMD)
ENSG00000164587	RPS14	ribosomal protein S14	CHEMBL4297744	ELX-02	FALSE	2	FALSE	Reactome	Nonsense-Mediated Decay (NMD)
ENSG00000186468	RPS23	ribosomal protein S23	CHEMBL256997	ATALUREN	TRUE	4	FALSE	Reactome	Nonsense-Mediated Decay (NMD)
ENSG00000186468	RPS23	ribosomal protein S23	CHEMBL4297744	ELX-02	FALSE	2	FALSE	Reactome	Nonsense-Mediated Decay (NMD)
ENSG00000186468	RPS23	ribosomal protein S23	CHEMBL4297789	MT-3724	FALSE	2	FALSE	Reactome	Nonsense-Mediated Decay (NMD)
ENSG00000213741	RPS29	ribosomal protein S29	CHEMBL256997	ATALUREN	TRUE	4	FALSE	Reactome	Nonsense-Mediated Decay (NMD)
ENSG00000213741	RPS29	ribosomal protein S29	CHEMBL4297744	ELX-02	FALSE	2	FALSE	Reactome	Nonsense-Mediated Decay (NMD)
ENSG00000213741	RPS29	ribosomal protein S29	CHEMBL4297789	MT-3724	FALSE	2	FALSE	Reactome	Nonsense-Mediated Decay (NMD)
ENSG00000110700	RPS13	ribosomal protein S13	CHEMBL256997	ATALUREN	TRUE	4	FALSE	Reactome	Nonsense-Mediated Decay (NMD)
ENSG00000110700	RPS13	ribosomal protein S13	CHEMBL4297744	ELX-02	FALSE	2	FALSE	Reactome	Nonsense-Mediated Decay (NMD)
ENSG00000110700	RPS13	ribosomal protein S13	CHEMBL4297789	MT-3724	FALSE	2	FALSE	Reactome	Nonsense-Mediated Decay (NMD)
ENSG00000142534	RPS11	ribosomal protein S11	CHEMBL256997	ATALUREN	TRUE	4	FALSE	Reactome	Nonsense-Mediated Decay (NMD)
ENSG00000142534	RPS11	ribosomal protein S11	CHEMBL4297744	ELX-02	FALSE	2	FALSE	Reactome	Nonsense-Mediated Decay (NMD)
ENSG00000142534	RPS11	ribosomal protein S11	CHEMBL4297789	MT-3724	FALSE	2	FALSE	Reactome	Nonsense-Mediated Decay (NMD)
ENSG00000198034	RPS4X	ribosomal protein S4 X-linked	CHEMBL256997	ATALUREN	TRUE	4	FALSE	Reactome	Nonsense-Mediated Decay (NMD)
ENSG00000198034	RPS4X	ribosomal protein S4 X-linked	CHEMBL4297744	ELX-02	FALSE	2	FALSE	Reactome	Nonsense-Mediated Decay (NMD)
ENSG00000198034	RPS4X	ribosomal protein S4 X-linked	CHEMBL4297789	MT-3724	FALSE	2	FALSE	Reactome	Nonsense-Mediated Decay (NMD)
ENSG00000198242	RPL23A	ribosomal protein L23a	CHEMBL256997	ATALUREN	TRUE	4	FALSE	Reactome	Nonsense-Mediated Decay (NMD)
ENSG00000198242	RPL23A	ribosomal protein L23a	CHEMBL4297744	ELX-02	FALSE	2	FALSE	Reactome	Nonsense-Mediated Decay (NMD)
ENSG00000198242	RPL23A	ribosomal protein L23a	CHEMBL4297789	MT-3724	FALSE	2	FALSE	Reactome	Nonsense-Mediated Decay (NMD)
ENSG00000137154	RPS6	ribosomal protein S6	CHEMBL256997	ATALUREN	TRUE	4	FALSE	Reactome	Nonsense-Mediated Decay (NMD)
ENSG00000137154	RPS6	ribosomal protein S6	CHEMBL4297744	ELX-02	FALSE	2	FALSE	Reactome	Nonsense-Mediated Decay (NMD)
ENSG00000137154	RPS6	ribosomal protein S6	CHEMBL4297789	MT-3724	FALSE	2	FALSE	Reactome	Nonsense-Mediated Decay (NMD)
ENSG00000125691	RPL23	ribosomal protein L23	CHEMBL256997	ATALUREN	TRUE	4	FALSE	Reactome	Nonsense-Mediated Decay (NMD)
ENSG00000125691	RPL23	ribosomal protein L23	CHEMBL4297789	MT-3724	FALSE	2	FALSE	Reactome	Nonsense-Mediated Decay (NMD)
ENSG00000125691	RPL23	ribosomal protein L23	CHEMBL4297744	ELX-02	FALSE	2	FALSE	Reactome	Nonsense-Mediated Decay (NMD)
ENSG00000115268	RPS15	ribosomal protein S15	CHEMBL256997	ATALUREN	TRUE	4	FALSE	Reactome	Nonsense-Mediated Decay (NMD)
ENSG00000115268	RPS15	ribosomal protein S15	CHEMBL4297744	ELX-02	FALSE	2	FALSE	Reactome	Nonsense-Mediated Decay (NMD)
ENSG00000115268	RPS15	ribosomal protein S15	CHEMBL4297789	MT-3724	FALSE	2	FALSE	Reactome	Nonsense-Mediated Decay (NMD)
ENSG00000138326	RPS24	ribosomal protein S24	CHEMBL256997	ATALUREN	TRUE	4	FALSE	Reactome	Nonsense-Mediated Decay (NMD)
ENSG00000138326	RPS24	ribosomal protein S24	CHEMBL4297789	MT-3724	FALSE	2	FALSE	Reactome	Nonsense-Mediated Decay (NMD)
ENSG00000138326	RPS24	ribosomal protein S24	CHEMBL4297744	ELX-02	FALSE	2	FALSE	Reactome	Nonsense-Mediated Decay (NMD)
ENSG00000197728	RPS26	ribosomal protein S26	CHEMBL256997	ATALUREN	TRUE	4	FALSE	Reactome	Nonsense-Mediated Decay (NMD)
ENSG00000197728	RPS26	ribosomal protein S26	CHEMBL4297744	ELX-02	FALSE	2	FALSE	Reactome	Nonsense-Mediated Decay (NMD)
ENSG00000197728	RPS26	ribosomal protein S26	CHEMBL4297789	MT-3724	FALSE	2	FALSE	Reactome	Nonsense-Mediated Decay (NMD)
ENSG00000233927	RPS28	ribosomal protein S28	CHEMBL256997	ATALUREN	TRUE	4	FALSE	Reactome	Nonsense-Mediated Decay (NMD)
ENSG00000233927	RPS28	ribosomal protein S28	CHEMBL4297744	ELX-02	FALSE	2	FALSE	Reactome	Nonsense-Mediated Decay (NMD)
ENSG00000233927	RPS28	ribosomal protein S28	CHEMBL4297789	MT-3724	FALSE	2	FALSE	Reactome	Nonsense-Mediated Decay (NMD)
ENSG00000149806	FAU	FAU ubiquitin like and ribosomal protein S30 fusion	CHEMBL256997	ATALUREN	TRUE	4	FALSE	Reactome	Nonsense-Mediated Decay (NMD)
ENSG00000149806	FAU	FAU ubiquitin like and ribosomal protein S30 fusion	CHEMBL4297744	ELX-02	FALSE	2	FALSE	Reactome	Nonsense-Mediated Decay (NMD)
ENSG00000149806	FAU	FAU ubiquitin like and ribosomal protein S30 fusion	CHEMBL4297789	MT-3724	FALSE	2	FALSE	Reactome	Nonsense-Mediated Decay (NMD)
ENSG00000156482	RPL30	ribosomal protein L30	CHEMBL256997	ATALUREN	TRUE	4	FALSE	Reactome	Nonsense-Mediated Decay (NMD)
ENSG00000156482	RPL30	ribosomal protein L30	CHEMBL4297789	MT-3724	FALSE	2	FALSE	Reactome	Nonsense-Mediated Decay (NMD)
ENSG00000156482	RPL30	ribosomal protein L30	CHEMBL4297744	ELX-02	FALSE	2	FALSE	Reactome	Nonsense-Mediated Decay (NMD)
ENSG00000198918	RPL39	ribosomal protein L39	CHEMBL256997	ATALUREN	TRUE	4	FALSE	Reactome	Nonsense-Mediated Decay (NMD)
ENSG00000198918	RPL39	ribosomal protein L39	CHEMBL4297744	ELX-02	FALSE	2	FALSE	Reactome	Nonsense-Mediated Decay (NMD)
ENSG00000198918	RPL39	ribosomal protein L39	CHEMBL4297789	MT-3724	FALSE	2	FALSE	Reactome	Nonsense-Mediated Decay (NMD)
ENSG00000071082	RPL31	ribosomal protein L31	CHEMBL256997	ATALUREN	TRUE	4	FALSE	Reactome	Nonsense-Mediated Decay (NMD)
ENSG00000071082	RPL31	ribosomal protein L31	CHEMBL4297744	ELX-02	FALSE	2	FALSE	Reactome	Nonsense-Mediated Decay (NMD)
ENSG00000071082	RPL31	ribosomal protein L31	CHEMBL4297789	MT-3724	FALSE	2	FALSE	Reactome	Nonsense-Mediated Decay (NMD)
ENSG00000198755	RPL10A	ribosomal protein L10a	CHEMBL256997	ATALUREN	TRUE	4	FALSE	Reactome	Nonsense-Mediated Decay (NMD)
ENSG00000198755	RPL10A	ribosomal protein L10a	CHEMBL4297789	MT-3724	FALSE	2	FALSE	Reactome	Nonsense-Mediated Decay (NMD)
ENSG00000198755	RPL10A	ribosomal protein L10a	CHEMBL4297744	ELX-02	FALSE	2	FALSE	Reactome	Nonsense-Mediated Decay (NMD)
ENSG00000144713	RPL32	ribosomal protein L32	CHEMBL256997	ATALUREN	TRUE	4	FALSE	Reactome	Nonsense-Mediated Decay (NMD)
ENSG00000144713	RPL32	ribosomal protein L32	CHEMBL4297744	ELX-02	FALSE	2	FALSE	Reactome	Nonsense-Mediated Decay (NMD)
ENSG00000144713	RPL32	ribosomal protein L32	CHEMBL4297789	MT-3724	FALSE	2	FALSE	Reactome	Nonsense-Mediated Decay (NMD)
ENSG00000142676	RPL11	ribosomal protein L11	CHEMBL256997	ATALUREN	TRUE	4	FALSE	Reactome	Nonsense-Mediated Decay (NMD)
ENSG00000142676	RPL11	ribosomal protein L11	CHEMBL4297789	MT-3724	FALSE	2	FALSE	Reactome	Nonsense-Mediated Decay (NMD)
ENSG00000142676	RPL11	ribosomal protein L11	CHEMBL4297744	ELX-02	FALSE	2	FALSE	Reactome	Nonsense-Mediated Decay (NMD)
ENSG00000161016	RPL8	ribosomal protein L8	CHEMBL256997	ATALUREN	TRUE	4	FALSE	Reactome	Nonsense-Mediated Decay (NMD)
ENSG00000161016	RPL8	ribosomal protein L8	CHEMBL4297744	ELX-02	FALSE	2	FALSE	Reactome	Nonsense-Mediated Decay (NMD)
ENSG00000161016	RPL8	ribosomal protein L8	CHEMBL4297789	MT-3724	FALSE	2	FALSE	Reactome	Nonsense-Mediated Decay (NMD)
ENSG00000229117	RPL41	ribosomal protein L41	CHEMBL256997	ATALUREN	TRUE	4	FALSE	Reactome	Nonsense-Mediated Decay (NMD)
ENSG00000229117	RPL41	ribosomal protein L41	CHEMBL4297744	ELX-02	FALSE	2	FALSE	Reactome	Nonsense-Mediated Decay (NMD)
ENSG00000229117	RPL41	ribosomal protein L41	CHEMBL4297789	MT-3724	FALSE	2	FALSE	Reactome	Nonsense-Mediated Decay (NMD)
ENSG00000143947	RPS27A	ribosomal protein S27a	CHEMBL256997	ATALUREN	TRUE	4	FALSE	Reactome	Nonsense-Mediated Decay (NMD)
ENSG00000143947	RPS27A	ribosomal protein S27a	CHEMBL4297744	ELX-02	FALSE	2	FALSE	Reactome	Nonsense-Mediated Decay (NMD)
ENSG00000143947	RPS27A	ribosomal protein S27a	CHEMBL4297789	MT-3724	FALSE	2	FALSE	Reactome	Nonsense-Mediated Decay (NMD)
ENSG00000172809	RPL38	ribosomal protein L38	CHEMBL256997	ATALUREN	TRUE	4	FALSE	Reactome	Nonsense-Mediated Decay (NMD)
ENSG00000172809	RPL38	ribosomal protein L38	CHEMBL4297744	ELX-02	FALSE	2	FALSE	Reactome	Nonsense-Mediated Decay (NMD)
ENSG00000172809	RPL38	ribosomal protein L38	CHEMBL4297789	MT-3724	FALSE	2	FALSE	Reactome	Nonsense-Mediated Decay (NMD)
ENSG00000171858	RPS21	ribosomal protein S21	CHEMBL256997	ATALUREN	TRUE	4	FALSE	Reactome	Nonsense-Mediated Decay (NMD)
ENSG00000171858	RPS21	ribosomal protein S21	CHEMBL4297744	ELX-02	FALSE	2	FALSE	Reactome	Nonsense-Mediated Decay (NMD)
ENSG00000171858	RPS21	ribosomal protein S21	CHEMBL4297789	MT-3724	FALSE	2	FALSE	Reactome	Nonsense-Mediated Decay (NMD)
ENSG00000113575	PPP2CA	protein phosphatase 2 catalytic subunit alpha	CHEMBL4297300	LB-100	FALSE	2	FALSE	Reactome	Nonsense-Mediated Decay (NMD)
ENSG00000114391	RPL24	ribosomal protein L24	CHEMBL256997	ATALUREN	TRUE	4	FALSE	Reactome	Nonsense-Mediated Decay (NMD)
ENSG00000114391	RPL24	ribosomal protein L24	CHEMBL4297744	ELX-02	FALSE	2	FALSE	Reactome	Nonsense-Mediated Decay (NMD)
ENSG00000114391	RPL24	ribosomal protein L24	CHEMBL4297789	MT-3724	FALSE	2	FALSE	Reactome	Nonsense-Mediated Decay (NMD)
ENSG00000241343	RPL36A	ribosomal protein L36a	CHEMBL256997	ATALUREN	TRUE	4	FALSE	Reactome	Nonsense-Mediated Decay (NMD)
ENSG00000241343	RPL36A	ribosomal protein L36a	CHEMBL4297744	ELX-02	FALSE	2	FALSE	Reactome	Nonsense-Mediated Decay (NMD)
ENSG00000241343	RPL36A	ribosomal protein L36a	CHEMBL4297789	MT-3724	FALSE	2	FALSE	Reactome	Nonsense-Mediated Decay (NMD)
ENSG00000108298	RPL19	ribosomal protein L19	CHEMBL256997	ATALUREN	TRUE	4	FALSE	Reactome	Nonsense-Mediated Decay (NMD)
ENSG00000108298	RPL19	ribosomal protein L19	CHEMBL4297744	ELX-02	FALSE	2	FALSE	Reactome	Nonsense-Mediated Decay (NMD)
ENSG00000108298	RPL19	ribosomal protein L19	CHEMBL4297789	MT-3724	FALSE	2	FALSE	Reactome	Nonsense-Mediated Decay (NMD)
ENSG00000105640	RPL18A	ribosomal protein L18a	CHEMBL256997	ATALUREN	TRUE	4	FALSE	Reactome	Nonsense-Mediated Decay (NMD)
ENSG00000105640	RPL18A	ribosomal protein L18a	CHEMBL4297744	ELX-02	FALSE	2	FALSE	Reactome	Nonsense-Mediated Decay (NMD)
ENSG00000105640	RPL18A	ribosomal protein L18a	CHEMBL4297789	MT-3724	FALSE	2	FALSE	Reactome	Nonsense-Mediated Decay (NMD)
ENSG00000089009	RPL6	ribosomal protein L6	CHEMBL256997	ATALUREN	TRUE	4	FALSE	Reactome	Nonsense-Mediated Decay (NMD)
ENSG00000089009	RPL6	ribosomal protein L6	CHEMBL4297744	ELX-02	FALSE	2	FALSE	Reactome	Nonsense-Mediated Decay (NMD)
ENSG00000089009	RPL6	ribosomal protein L6	CHEMBL4297789	MT-3724	FALSE	2	FALSE	Reactome	Nonsense-Mediated Decay (NMD)
ENSG00000063177	RPL18	ribosomal protein L18	CHEMBL256997	ATALUREN	TRUE	4	FALSE	Reactome	Nonsense-Mediated Decay (NMD)
ENSG00000063177	RPL18	ribosomal protein L18	CHEMBL4297744	ELX-02	FALSE	2	FALSE	Reactome	Nonsense-Mediated Decay (NMD)
ENSG00000063177	RPL18	ribosomal protein L18	CHEMBL4297789	MT-3724	FALSE	2	FALSE	Reactome	Nonsense-Mediated Decay (NMD)
ENSG00000136937	NCBP1	nuclear cap binding protein subunit 1	CHEMBL4297344	ABX-464	FALSE	2	FALSE	Reactome	Nonsense-Mediated Decay (NMD)
ENSG00000130255	RPL36	ribosomal protein L36	CHEMBL256997	ATALUREN	TRUE	4	FALSE	Reactome	Nonsense-Mediated Decay (NMD)
ENSG00000130255	RPL36	ribosomal protein L36	CHEMBL4297744	ELX-02	FALSE	2	FALSE	Reactome	Nonsense-Mediated Decay (NMD)
ENSG00000130255	RPL36	ribosomal protein L36	CHEMBL4297789	MT-3724	FALSE	2	FALSE	Reactome	Nonsense-Mediated Decay (NMD)
ENSG00000137818	RPLP1	ribosomal protein lateral stalk subunit P1	CHEMBL256997	ATALUREN	TRUE	4	FALSE	Reactome	Nonsense Mediated Decay (NMD) enhanced by the Exon Junction Complex (EJC)
ENSG00000137818	RPLP1	ribosomal protein lateral stalk subunit P1	CHEMBL4297789	MT-3724	FALSE	2	FALSE	Reactome	Nonsense Mediated Decay (NMD) enhanced by the Exon Junction Complex (EJC)
ENSG00000137818	RPLP1	ribosomal protein lateral stalk subunit P1	CHEMBL4297744	ELX-02	FALSE	2	FALSE	Reactome	Nonsense Mediated Decay (NMD) enhanced by the Exon Junction Complex (EJC)
ENSG00000089157	RPLP0	ribosomal protein lateral stalk subunit P0	CHEMBL256997	ATALUREN	TRUE	4	FALSE	Reactome	Nonsense Mediated Decay (NMD) enhanced by the Exon Junction Complex (EJC)
ENSG00000089157	RPLP0	ribosomal protein lateral stalk subunit P0	CHEMBL4297789	MT-3724	FALSE	2	FALSE	Reactome	Nonsense Mediated Decay (NMD) enhanced by the Exon Junction Complex (EJC)
ENSG00000089157	RPLP0	ribosomal protein lateral stalk subunit P0	CHEMBL4297744	ELX-02	FALSE	2	FALSE	Reactome	Nonsense Mediated Decay (NMD) enhanced by the Exon Junction Complex (EJC)
ENSG00000168028	RPSA	ribosomal protein SA	CHEMBL256997	ATALUREN	TRUE	4	FALSE	Reactome	Nonsense Mediated Decay (NMD) enhanced by the Exon Junction Complex (EJC)
ENSG00000168028	RPSA	ribosomal protein SA	CHEMBL4297744	ELX-02	FALSE	2	FALSE	Reactome	Nonsense Mediated Decay (NMD) enhanced by the Exon Junction Complex (EJC)
ENSG00000168028	RPSA	ribosomal protein SA	CHEMBL4297789	MT-3724	FALSE	2	FALSE	Reactome	Nonsense Mediated Decay (NMD) enhanced by the Exon Junction Complex (EJC)
ENSG00000140988	RPS2	ribosomal protein S2	CHEMBL256997	ATALUREN	TRUE	4	FALSE	Reactome	Nonsense Mediated Decay (NMD) enhanced by the Exon Junction Complex (EJC)
ENSG00000140988	RPS2	ribosomal protein S2	CHEMBL4297744	ELX-02	FALSE	2	FALSE	Reactome	Nonsense Mediated Decay (NMD) enhanced by the Exon Junction Complex (EJC)
ENSG00000140988	RPS2	ribosomal protein S2	CHEMBL4297789	MT-3724	FALSE	2	FALSE	Reactome	Nonsense Mediated Decay (NMD) enhanced by the Exon Junction Complex (EJC)
ENSG00000182899	RPL35A	ribosomal protein L35a	CHEMBL256997	ATALUREN	TRUE	4	FALSE	Reactome	Nonsense Mediated Decay (NMD) enhanced by the Exon Junction Complex (EJC)
ENSG00000182899	RPL35A	ribosomal protein L35a	CHEMBL4297789	MT-3724	FALSE	2	FALSE	Reactome	Nonsense Mediated Decay (NMD) enhanced by the Exon Junction Complex (EJC)
ENSG00000182899	RPL35A	ribosomal protein L35a	CHEMBL4297744	ELX-02	FALSE	2	FALSE	Reactome	Nonsense Mediated Decay (NMD) enhanced by the Exon Junction Complex (EJC)
ENSG00000147604	RPL7	ribosomal protein L7	CHEMBL256997	ATALUREN	TRUE	4	FALSE	Reactome	Nonsense Mediated Decay (NMD) enhanced by the Exon Junction Complex (EJC)
ENSG00000147604	RPL7	ribosomal protein L7	CHEMBL4297744	ELX-02	FALSE	2	FALSE	Reactome	Nonsense Mediated Decay (NMD) enhanced by the Exon Junction Complex (EJC)
ENSG00000147604	RPL7	ribosomal protein L7	CHEMBL4297789	MT-3724	FALSE	2	FALSE	Reactome	Nonsense Mediated Decay (NMD) enhanced by the Exon Junction Complex (EJC)
ENSG00000265681	RPL17	ribosomal protein L17	CHEMBL256997	ATALUREN	TRUE	4	FALSE	Reactome	Nonsense Mediated Decay (NMD) enhanced by the Exon Junction Complex (EJC)
ENSG00000265681	RPL17	ribosomal protein L17	CHEMBL4297744	ELX-02	FALSE	2	FALSE	Reactome	Nonsense Mediated Decay (NMD) enhanced by the Exon Junction Complex (EJC)
ENSG00000265681	RPL17	ribosomal protein L17	CHEMBL4297789	MT-3724	FALSE	2	FALSE	Reactome	Nonsense Mediated Decay (NMD) enhanced by the Exon Junction Complex (EJC)
ENSG00000129824	RPS4Y1	ribosomal protein S4 Y-linked 1	CHEMBL256997	ATALUREN	TRUE	4	FALSE	Reactome	Nonsense Mediated Decay (NMD) enhanced by the Exon Junction Complex (EJC)
ENSG00000129824	RPS4Y1	ribosomal protein S4 Y-linked 1	CHEMBL4297744	ELX-02	FALSE	2	FALSE	Reactome	Nonsense Mediated Decay (NMD) enhanced by the Exon Junction Complex (EJC)
ENSG00000129824	RPS4Y1	ribosomal protein S4 Y-linked 1	CHEMBL4297789	MT-3724	FALSE	2	FALSE	Reactome	Nonsense Mediated Decay (NMD) enhanced by the Exon Junction Complex (EJC)
ENSG00000149273	RPS3	ribosomal protein S3	CHEMBL256997	ATALUREN	TRUE	4	FALSE	Reactome	Nonsense Mediated Decay (NMD) enhanced by the Exon Junction Complex (EJC)
ENSG00000149273	RPS3	ribosomal protein S3	CHEMBL4297789	MT-3724	FALSE	2	FALSE	Reactome	Nonsense Mediated Decay (NMD) enhanced by the Exon Junction Complex (EJC)
ENSG00000149273	RPS3	ribosomal protein S3	CHEMBL4297744	ELX-02	FALSE	2	FALSE	Reactome	Nonsense Mediated Decay (NMD) enhanced by the Exon Junction Complex (EJC)
ENSG00000112306	RPS12	ribosomal protein S12	CHEMBL256997	ATALUREN	TRUE	4	FALSE	Reactome	Nonsense Mediated Decay (NMD) enhanced by the Exon Junction Complex (EJC)
ENSG00000112306	RPS12	ribosomal protein S12	CHEMBL4297744	ELX-02	FALSE	2	FALSE	Reactome	Nonsense Mediated Decay (NMD) enhanced by the Exon Junction Complex (EJC)
ENSG00000112306	RPS12	ribosomal protein S12	CHEMBL4297789	MT-3724	FALSE	2	FALSE	Reactome	Nonsense Mediated Decay (NMD) enhanced by the Exon Junction Complex (EJC)
ENSG00000167526	RPL13	ribosomal protein L13	CHEMBL256997	ATALUREN	TRUE	4	FALSE	Reactome	Nonsense Mediated Decay (NMD) enhanced by the Exon Junction Complex (EJC)
ENSG00000167526	RPL13	ribosomal protein L13	CHEMBL4297789	MT-3724	FALSE	2	FALSE	Reactome	Nonsense Mediated Decay (NMD) enhanced by the Exon Junction Complex (EJC)
ENSG00000167526	RPL13	ribosomal protein L13	CHEMBL4297744	ELX-02	FALSE	2	FALSE	Reactome	Nonsense Mediated Decay (NMD) enhanced by the Exon Junction Complex (EJC)
ENSG00000147403	RPL10	ribosomal protein L10	CHEMBL256997	ATALUREN	TRUE	4	FALSE	Reactome	Nonsense Mediated Decay (NMD) enhanced by the Exon Junction Complex (EJC)
ENSG00000147403	RPL10	ribosomal protein L10	CHEMBL4297744	ELX-02	FALSE	2	FALSE	Reactome	Nonsense Mediated Decay (NMD) enhanced by the Exon Junction Complex (EJC)
ENSG00000147403	RPL10	ribosomal protein L10	CHEMBL4297789	MT-3724	FALSE	2	FALSE	Reactome	Nonsense Mediated Decay (NMD) enhanced by the Exon Junction Complex (EJC)
ENSG00000197958	RPL12	ribosomal protein L12	CHEMBL256997	ATALUREN	TRUE	4	FALSE	Reactome	Nonsense Mediated Decay (NMD) enhanced by the Exon Junction Complex (EJC)
ENSG00000197958	RPL12	ribosomal protein L12	CHEMBL4297744	ELX-02	FALSE	2	FALSE	Reactome	Nonsense Mediated Decay (NMD) enhanced by the Exon Junction Complex (EJC)
ENSG00000197958	RPL12	ribosomal protein L12	CHEMBL4297789	MT-3724	FALSE	2	FALSE	Reactome	Nonsense Mediated Decay (NMD) enhanced by the Exon Junction Complex (EJC)
ENSG00000163682	RPL9	ribosomal protein L9	CHEMBL256997	ATALUREN	TRUE	4	FALSE	Reactome	Nonsense Mediated Decay (NMD) enhanced by the Exon Junction Complex (EJC)
ENSG00000163682	RPL9	ribosomal protein L9	CHEMBL4297744	ELX-02	FALSE	2	FALSE	Reactome	Nonsense Mediated Decay (NMD) enhanced by the Exon Junction Complex (EJC)
ENSG00000163682	RPL9	ribosomal protein L9	CHEMBL4297789	MT-3724	FALSE	2	FALSE	Reactome	Nonsense Mediated Decay (NMD) enhanced by the Exon Junction Complex (EJC)
ENSG00000116251	RPL22	ribosomal protein L22	CHEMBL256997	ATALUREN	TRUE	4	FALSE	Reactome	Nonsense Mediated Decay (NMD) enhanced by the Exon Junction Complex (EJC)
ENSG00000116251	RPL22	ribosomal protein L22	CHEMBL4297789	MT-3724	FALSE	2	FALSE	Reactome	Nonsense Mediated Decay (NMD) enhanced by the Exon Junction Complex (EJC)
ENSG00000116251	RPL22	ribosomal protein L22	CHEMBL4297744	ELX-02	FALSE	2	FALSE	Reactome	Nonsense Mediated Decay (NMD) enhanced by the Exon Junction Complex (EJC)
ENSG00000174444	RPL4	ribosomal protein L4	CHEMBL256997	ATALUREN	TRUE	4	FALSE	Reactome	Nonsense Mediated Decay (NMD) enhanced by the Exon Junction Complex (EJC)
ENSG00000174444	RPL4	ribosomal protein L4	CHEMBL4297744	ELX-02	FALSE	2	FALSE	Reactome	Nonsense Mediated Decay (NMD) enhanced by the Exon Junction Complex (EJC)
ENSG00000174444	RPL4	ribosomal protein L4	CHEMBL4297789	MT-3724	FALSE	2	FALSE	Reactome	Nonsense Mediated Decay (NMD) enhanced by the Exon Junction Complex (EJC)
ENSG00000105372	RPS19	ribosomal protein S19	CHEMBL256997	ATALUREN	TRUE	4	FALSE	Reactome	Nonsense Mediated Decay (NMD) enhanced by the Exon Junction Complex (EJC)
ENSG00000105372	RPS19	ribosomal protein S19	CHEMBL4297744	ELX-02	FALSE	2	FALSE	Reactome	Nonsense Mediated Decay (NMD) enhanced by the Exon Junction Complex (EJC)
ENSG00000105372	RPS19	ribosomal protein S19	CHEMBL4297789	MT-3724	FALSE	2	FALSE	Reactome	Nonsense Mediated Decay (NMD) enhanced by the Exon Junction Complex (EJC)
ENSG00000100316	RPL3	ribosomal protein L3	CHEMBL256997	ATALUREN	TRUE	4	FALSE	Reactome	Nonsense Mediated Decay (NMD) enhanced by the Exon Junction Complex (EJC)
ENSG00000100316	RPL3	ribosomal protein L3	CHEMBL4297744	ELX-02	FALSE	2	FALSE	Reactome	Nonsense Mediated Decay (NMD) enhanced by the Exon Junction Complex (EJC)
ENSG00000100316	RPL3	ribosomal protein L3	CHEMBL4297789	MT-3724	FALSE	2	FALSE	Reactome	Nonsense Mediated Decay (NMD) enhanced by the Exon Junction Complex (EJC)
ENSG00000142541	RPL13A	ribosomal protein L13a	CHEMBL256997	ATALUREN	TRUE	4	FALSE	Reactome	Nonsense Mediated Decay (NMD) enhanced by the Exon Junction Complex (EJC)
ENSG00000142541	RPL13A	ribosomal protein L13a	CHEMBL4297789	MT-3724	FALSE	2	FALSE	Reactome	Nonsense Mediated Decay (NMD) enhanced by the Exon Junction Complex (EJC)
ENSG00000142541	RPL13A	ribosomal protein L13a	CHEMBL4297744	ELX-02	FALSE	2	FALSE	Reactome	Nonsense Mediated Decay (NMD) enhanced by the Exon Junction Complex (EJC)
ENSG00000177954	RPS27	ribosomal protein S27	CHEMBL256997	ATALUREN	TRUE	4	FALSE	Reactome	Nonsense Mediated Decay (NMD) enhanced by the Exon Junction Complex (EJC)
ENSG00000177954	RPS27	ribosomal protein S27	CHEMBL4297744	ELX-02	FALSE	2	FALSE	Reactome	Nonsense Mediated Decay (NMD) enhanced by the Exon Junction Complex (EJC)
ENSG00000177954	RPS27	ribosomal protein S27	CHEMBL4297789	MT-3724	FALSE	2	FALSE	Reactome	Nonsense Mediated Decay (NMD) enhanced by the Exon Junction Complex (EJC)
ENSG00000136942	RPL35	ribosomal protein L35	CHEMBL256997	ATALUREN	TRUE	4	FALSE	Reactome	Nonsense Mediated Decay (NMD) enhanced by the Exon Junction Complex (EJC)
ENSG00000136942	RPL35	ribosomal protein L35	CHEMBL4297789	MT-3724	FALSE	2	FALSE	Reactome	Nonsense Mediated Decay (NMD) enhanced by the Exon Junction Complex (EJC)
ENSG00000136942	RPL35	ribosomal protein L35	CHEMBL4297744	ELX-02	FALSE	2	FALSE	Reactome	Nonsense Mediated Decay (NMD) enhanced by the Exon Junction Complex (EJC)
ENSG00000166441	RPL27A	ribosomal protein L27a	CHEMBL256997	ATALUREN	TRUE	4	FALSE	Reactome	Nonsense Mediated Decay (NMD) enhanced by the Exon Junction Complex (EJC)
ENSG00000166441	RPL27A	ribosomal protein L27a	CHEMBL4297744	ELX-02	FALSE	2	FALSE	Reactome	Nonsense Mediated Decay (NMD) enhanced by the Exon Junction Complex (EJC)
ENSG00000166441	RPL27A	ribosomal protein L27a	CHEMBL4297789	MT-3724	FALSE	2	FALSE	Reactome	Nonsense Mediated Decay (NMD) enhanced by the Exon Junction Complex (EJC)
ENSG00000122406	RPL5	ribosomal protein L5	CHEMBL256997	ATALUREN	TRUE	4	FALSE	Reactome	Nonsense Mediated Decay (NMD) enhanced by the Exon Junction Complex (EJC)
ENSG00000122406	RPL5	ribosomal protein L5	CHEMBL4297744	ELX-02	FALSE	2	FALSE	Reactome	Nonsense Mediated Decay (NMD) enhanced by the Exon Junction Complex (EJC)
ENSG00000122406	RPL5	ribosomal protein L5	CHEMBL4297789	MT-3724	FALSE	2	FALSE	Reactome	Nonsense Mediated Decay (NMD) enhanced by the Exon Junction Complex (EJC)
ENSG00000122026	RPL21	ribosomal protein L21	CHEMBL256997	ATALUREN	TRUE	4	FALSE	Reactome	Nonsense Mediated Decay (NMD) enhanced by the Exon Junction Complex (EJC)
ENSG00000122026	RPL21	ribosomal protein L21	CHEMBL4297744	ELX-02	FALSE	2	FALSE	Reactome	Nonsense Mediated Decay (NMD) enhanced by the Exon Junction Complex (EJC)
ENSG00000122026	RPL21	ribosomal protein L21	CHEMBL4297789	MT-3724	FALSE	2	FALSE	Reactome	Nonsense Mediated Decay (NMD) enhanced by the Exon Junction Complex (EJC)
ENSG00000108107	RPL28	ribosomal protein L28	CHEMBL256997	ATALUREN	TRUE	4	FALSE	Reactome	Nonsense Mediated Decay (NMD) enhanced by the Exon Junction Complex (EJC)
ENSG00000108107	RPL28	ribosomal protein L28	CHEMBL4297744	ELX-02	FALSE	2	FALSE	Reactome	Nonsense Mediated Decay (NMD) enhanced by the Exon Junction Complex (EJC)
ENSG00000108107	RPL28	ribosomal protein L28	CHEMBL4297789	MT-3724	FALSE	2	FALSE	Reactome	Nonsense Mediated Decay (NMD) enhanced by the Exon Junction Complex (EJC)
ENSG00000083845	RPS5	ribosomal protein S5	CHEMBL256997	ATALUREN	TRUE	4	FALSE	Reactome	Nonsense Mediated Decay (NMD) enhanced by the Exon Junction Complex (EJC)
ENSG00000083845	RPS5	ribosomal protein S5	CHEMBL4297744	ELX-02	FALSE	2	FALSE	Reactome	Nonsense Mediated Decay (NMD) enhanced by the Exon Junction Complex (EJC)
ENSG00000083845	RPS5	ribosomal protein S5	CHEMBL4297789	MT-3724	FALSE	2	FALSE	Reactome	Nonsense Mediated Decay (NMD) enhanced by the Exon Junction Complex (EJC)
ENSG00000124614	RPS10	ribosomal protein S10	CHEMBL256997	ATALUREN	TRUE	4	FALSE	Reactome	Nonsense Mediated Decay (NMD) enhanced by the Exon Junction Complex (EJC)
ENSG00000124614	RPS10	ribosomal protein S10	CHEMBL4297744	ELX-02	FALSE	2	FALSE	Reactome	Nonsense Mediated Decay (NMD) enhanced by the Exon Junction Complex (EJC)
ENSG00000124614	RPS10	ribosomal protein S10	CHEMBL4297789	MT-3724	FALSE	2	FALSE	Reactome	Nonsense Mediated Decay (NMD) enhanced by the Exon Junction Complex (EJC)
ENSG00000162244	RPL29	ribosomal protein L29	CHEMBL256997	ATALUREN	TRUE	4	FALSE	Reactome	Nonsense Mediated Decay (NMD) enhanced by the Exon Junction Complex (EJC)
ENSG00000162244	RPL29	ribosomal protein L29	CHEMBL4297789	MT-3724	FALSE	2	FALSE	Reactome	Nonsense Mediated Decay (NMD) enhanced by the Exon Junction Complex (EJC)
ENSG00000162244	RPL29	ribosomal protein L29	CHEMBL4297744	ELX-02	FALSE	2	FALSE	Reactome	Nonsense Mediated Decay (NMD) enhanced by the Exon Junction Complex (EJC)
ENSG00000109475	RPL34	ribosomal protein L34	CHEMBL256997	ATALUREN	TRUE	4	FALSE	Reactome	Nonsense Mediated Decay (NMD) enhanced by the Exon Junction Complex (EJC)
ENSG00000109475	RPL34	ribosomal protein L34	CHEMBL4297789	MT-3724	FALSE	2	FALSE	Reactome	Nonsense Mediated Decay (NMD) enhanced by the Exon Junction Complex (EJC)
ENSG00000109475	RPL34	ribosomal protein L34	CHEMBL4297744	ELX-02	FALSE	2	FALSE	Reactome	Nonsense Mediated Decay (NMD) enhanced by the Exon Junction Complex (EJC)
ENSG00000188846	RPL14	ribosomal protein L14	CHEMBL256997	ATALUREN	TRUE	4	FALSE	Reactome	Nonsense Mediated Decay (NMD) enhanced by the Exon Junction Complex (EJC)
ENSG00000188846	RPL14	ribosomal protein L14	CHEMBL4297744	ELX-02	FALSE	2	FALSE	Reactome	Nonsense Mediated Decay (NMD) enhanced by the Exon Junction Complex (EJC)
ENSG00000188846	RPL14	ribosomal protein L14	CHEMBL4297789	MT-3724	FALSE	2	FALSE	Reactome	Nonsense Mediated Decay (NMD) enhanced by the Exon Junction Complex (EJC)
ENSG00000114503	NCBP2	nuclear cap binding protein subunit 2	CHEMBL4297344	ABX-464	FALSE	2	FALSE	Reactome	Nonsense Mediated Decay (NMD) enhanced by the Exon Junction Complex (EJC)
ENSG00000008988	RPS20	ribosomal protein S20	CHEMBL256997	ATALUREN	TRUE	4	FALSE	Reactome	Nonsense Mediated Decay (NMD) enhanced by the Exon Junction Complex (EJC)
ENSG00000008988	RPS20	ribosomal protein S20	CHEMBL4297744	ELX-02	FALSE	2	FALSE	Reactome	Nonsense Mediated Decay (NMD) enhanced by the Exon Junction Complex (EJC)
ENSG00000008988	RPS20	ribosomal protein S20	CHEMBL4297789	MT-3724	FALSE	2	FALSE	Reactome	Nonsense Mediated Decay (NMD) enhanced by the Exon Junction Complex (EJC)
ENSG00000145425	RPS3A	ribosomal protein S3A	CHEMBL256997	ATALUREN	TRUE	4	FALSE	Reactome	Nonsense Mediated Decay (NMD) enhanced by the Exon Junction Complex (EJC)
ENSG00000145425	RPS3A	ribosomal protein S3A	CHEMBL4297744	ELX-02	FALSE	2	FALSE	Reactome	Nonsense Mediated Decay (NMD) enhanced by the Exon Junction Complex (EJC)
ENSG00000145425	RPS3A	ribosomal protein S3A	CHEMBL4297789	MT-3724	FALSE	2	FALSE	Reactome	Nonsense Mediated Decay (NMD) enhanced by the Exon Junction Complex (EJC)
ENSG00000161970	RPL26	ribosomal protein L26	CHEMBL256997	ATALUREN	TRUE	4	FALSE	Reactome	Nonsense Mediated Decay (NMD) enhanced by the Exon Junction Complex (EJC)
ENSG00000161970	RPL26	ribosomal protein L26	CHEMBL4297789	MT-3724	FALSE	2	FALSE	Reactome	Nonsense Mediated Decay (NMD) enhanced by the Exon Junction Complex (EJC)
ENSG00000161970	RPL26	ribosomal protein L26	CHEMBL4297744	ELX-02	FALSE	2	FALSE	Reactome	Nonsense Mediated Decay (NMD) enhanced by the Exon Junction Complex (EJC)
ENSG00000174748	RPL15	ribosomal protein L15	CHEMBL256997	ATALUREN	TRUE	4	FALSE	Reactome	Nonsense Mediated Decay (NMD) enhanced by the Exon Junction Complex (EJC)
ENSG00000174748	RPL15	ribosomal protein L15	CHEMBL4297789	MT-3724	FALSE	2	FALSE	Reactome	Nonsense Mediated Decay (NMD) enhanced by the Exon Junction Complex (EJC)
ENSG00000174748	RPL15	ribosomal protein L15	CHEMBL4297744	ELX-02	FALSE	2	FALSE	Reactome	Nonsense Mediated Decay (NMD) enhanced by the Exon Junction Complex (EJC)
ENSG00000131469	RPL27	ribosomal protein L27	CHEMBL256997	ATALUREN	TRUE	4	FALSE	Reactome	Nonsense Mediated Decay (NMD) enhanced by the Exon Junction Complex (EJC)
ENSG00000131469	RPL27	ribosomal protein L27	CHEMBL4297744	ELX-02	FALSE	2	FALSE	Reactome	Nonsense Mediated Decay (NMD) enhanced by the Exon Junction Complex (EJC)
ENSG00000131469	RPL27	ribosomal protein L27	CHEMBL4297789	MT-3724	FALSE	2	FALSE	Reactome	Nonsense Mediated Decay (NMD) enhanced by the Exon Junction Complex (EJC)
ENSG00000197756	RPL37A	ribosomal protein L37a	CHEMBL256997	ATALUREN	TRUE	4	FALSE	Reactome	Nonsense Mediated Decay (NMD) enhanced by the Exon Junction Complex (EJC)
ENSG00000197756	RPL37A	ribosomal protein L37a	CHEMBL4297744	ELX-02	FALSE	2	FALSE	Reactome	Nonsense Mediated Decay (NMD) enhanced by the Exon Junction Complex (EJC)
ENSG00000197756	RPL37A	ribosomal protein L37a	CHEMBL4297789	MT-3724	FALSE	2	FALSE	Reactome	Nonsense Mediated Decay (NMD) enhanced by the Exon Junction Complex (EJC)
ENSG00000145592	RPL37	ribosomal protein L37	CHEMBL256997	ATALUREN	TRUE	4	FALSE	Reactome	Nonsense Mediated Decay (NMD) enhanced by the Exon Junction Complex (EJC)
ENSG00000145592	RPL37	ribosomal protein L37	CHEMBL4297744	ELX-02	FALSE	2	FALSE	Reactome	Nonsense Mediated Decay (NMD) enhanced by the Exon Junction Complex (EJC)
ENSG00000145592	RPL37	ribosomal protein L37	CHEMBL4297789	MT-3724	FALSE	2	FALSE	Reactome	Nonsense Mediated Decay (NMD) enhanced by the Exon Junction Complex (EJC)
ENSG00000171863	RPS7	ribosomal protein S7	CHEMBL256997	ATALUREN	TRUE	4	FALSE	Reactome	Nonsense Mediated Decay (NMD) enhanced by the Exon Junction Complex (EJC)
ENSG00000171863	RPS7	ribosomal protein S7	CHEMBL4297789	MT-3724	FALSE	2	FALSE	Reactome	Nonsense Mediated Decay (NMD) enhanced by the Exon Junction Complex (EJC)
ENSG00000171863	RPS7	ribosomal protein S7	CHEMBL4297744	ELX-02	FALSE	2	FALSE	Reactome	Nonsense Mediated Decay (NMD) enhanced by the Exon Junction Complex (EJC)
ENSG00000142937	RPS8	ribosomal protein S8	CHEMBL256997	ATALUREN	TRUE	4	FALSE	Reactome	Nonsense Mediated Decay (NMD) enhanced by the Exon Junction Complex (EJC)
ENSG00000142937	RPS8	ribosomal protein S8	CHEMBL4297789	MT-3724	FALSE	2	FALSE	Reactome	Nonsense Mediated Decay (NMD) enhanced by the Exon Junction Complex (EJC)
ENSG00000142937	RPS8	ribosomal protein S8	CHEMBL4297744	ELX-02	FALSE	2	FALSE	Reactome	Nonsense Mediated Decay (NMD) enhanced by the Exon Junction Complex (EJC)
ENSG00000134419	RPS15A	ribosomal protein S15a	CHEMBL256997	ATALUREN	TRUE	4	FALSE	Reactome	Nonsense Mediated Decay (NMD) enhanced by the Exon Junction Complex (EJC)
ENSG00000134419	RPS15A	ribosomal protein S15a	CHEMBL4297744	ELX-02	FALSE	2	FALSE	Reactome	Nonsense Mediated Decay (NMD) enhanced by the Exon Junction Complex (EJC)
ENSG00000134419	RPS15A	ribosomal protein S15a	CHEMBL4297789	MT-3724	FALSE	2	FALSE	Reactome	Nonsense Mediated Decay (NMD) enhanced by the Exon Junction Complex (EJC)
ENSG00000105193	RPS16	ribosomal protein S16	CHEMBL256997	ATALUREN	TRUE	4	FALSE	Reactome	Nonsense Mediated Decay (NMD) enhanced by the Exon Junction Complex (EJC)
ENSG00000105193	RPS16	ribosomal protein S16	CHEMBL4297789	MT-3724	FALSE	2	FALSE	Reactome	Nonsense Mediated Decay (NMD) enhanced by the Exon Junction Complex (EJC)
ENSG00000105193	RPS16	ribosomal protein S16	CHEMBL4297744	ELX-02	FALSE	2	FALSE	Reactome	Nonsense Mediated Decay (NMD) enhanced by the Exon Junction Complex (EJC)
ENSG00000164587	RPS14	ribosomal protein S14	CHEMBL256997	ATALUREN	TRUE	4	FALSE	Reactome	Nonsense Mediated Decay (NMD) enhanced by the Exon Junction Complex (EJC)
ENSG00000164587	RPS14	ribosomal protein S14	CHEMBL4297789	MT-3724	FALSE	2	FALSE	Reactome	Nonsense Mediated Decay (NMD) enhanced by the Exon Junction Complex (EJC)
ENSG00000164587	RPS14	ribosomal protein S14	CHEMBL4297744	ELX-02	FALSE	2	FALSE	Reactome	Nonsense Mediated Decay (NMD) enhanced by the Exon Junction Complex (EJC)
ENSG00000186468	RPS23	ribosomal protein S23	CHEMBL256997	ATALUREN	TRUE	4	FALSE	Reactome	Nonsense Mediated Decay (NMD) enhanced by the Exon Junction Complex (EJC)
ENSG00000186468	RPS23	ribosomal protein S23	CHEMBL4297744	ELX-02	FALSE	2	FALSE	Reactome	Nonsense Mediated Decay (NMD) enhanced by the Exon Junction Complex (EJC)
ENSG00000186468	RPS23	ribosomal protein S23	CHEMBL4297789	MT-3724	FALSE	2	FALSE	Reactome	Nonsense Mediated Decay (NMD) enhanced by the Exon Junction Complex (EJC)
ENSG00000213741	RPS29	ribosomal protein S29	CHEMBL256997	ATALUREN	TRUE	4	FALSE	Reactome	Nonsense Mediated Decay (NMD) enhanced by the Exon Junction Complex (EJC)
ENSG00000213741	RPS29	ribosomal protein S29	CHEMBL4297744	ELX-02	FALSE	2	FALSE	Reactome	Nonsense Mediated Decay (NMD) enhanced by the Exon Junction Complex (EJC)
ENSG00000213741	RPS29	ribosomal protein S29	CHEMBL4297789	MT-3724	FALSE	2	FALSE	Reactome	Nonsense Mediated Decay (NMD) enhanced by the Exon Junction Complex (EJC)
ENSG00000110700	RPS13	ribosomal protein S13	CHEMBL256997	ATALUREN	TRUE	4	FALSE	Reactome	Nonsense Mediated Decay (NMD) enhanced by the Exon Junction Complex (EJC)
ENSG00000110700	RPS13	ribosomal protein S13	CHEMBL4297744	ELX-02	FALSE	2	FALSE	Reactome	Nonsense Mediated Decay (NMD) enhanced by the Exon Junction Complex (EJC)
ENSG00000110700	RPS13	ribosomal protein S13	CHEMBL4297789	MT-3724	FALSE	2	FALSE	Reactome	Nonsense Mediated Decay (NMD) enhanced by the Exon Junction Complex (EJC)
ENSG00000142534	RPS11	ribosomal protein S11	CHEMBL256997	ATALUREN	TRUE	4	FALSE	Reactome	Nonsense Mediated Decay (NMD) enhanced by the Exon Junction Complex (EJC)
ENSG00000142534	RPS11	ribosomal protein S11	CHEMBL4297744	ELX-02	FALSE	2	FALSE	Reactome	Nonsense Mediated Decay (NMD) enhanced by the Exon Junction Complex (EJC)
ENSG00000142534	RPS11	ribosomal protein S11	CHEMBL4297789	MT-3724	FALSE	2	FALSE	Reactome	Nonsense Mediated Decay (NMD) enhanced by the Exon Junction Complex (EJC)
ENSG00000198034	RPS4X	ribosomal protein S4 X-linked	CHEMBL256997	ATALUREN	TRUE	4	FALSE	Reactome	Nonsense Mediated Decay (NMD) enhanced by the Exon Junction Complex (EJC)
ENSG00000198034	RPS4X	ribosomal protein S4 X-linked	CHEMBL4297744	ELX-02	FALSE	2	FALSE	Reactome	Nonsense Mediated Decay (NMD) enhanced by the Exon Junction Complex (EJC)
ENSG00000198034	RPS4X	ribosomal protein S4 X-linked	CHEMBL4297789	MT-3724	FALSE	2	FALSE	Reactome	Nonsense Mediated Decay (NMD) enhanced by the Exon Junction Complex (EJC)
ENSG00000198242	RPL23A	ribosomal protein L23a	CHEMBL256997	ATALUREN	TRUE	4	FALSE	Reactome	Nonsense Mediated Decay (NMD) enhanced by the Exon Junction Complex (EJC)
ENSG00000198242	RPL23A	ribosomal protein L23a	CHEMBL4297744	ELX-02	FALSE	2	FALSE	Reactome	Nonsense Mediated Decay (NMD) enhanced by the Exon Junction Complex (EJC)
ENSG00000198242	RPL23A	ribosomal protein L23a	CHEMBL4297789	MT-3724	FALSE	2	FALSE	Reactome	Nonsense Mediated Decay (NMD) enhanced by the Exon Junction Complex (EJC)
ENSG00000137154	RPS6	ribosomal protein S6	CHEMBL256997	ATALUREN	TRUE	4	FALSE	Reactome	Nonsense Mediated Decay (NMD) enhanced by the Exon Junction Complex (EJC)
ENSG00000137154	RPS6	ribosomal protein S6	CHEMBL4297744	ELX-02	FALSE	2	FALSE	Reactome	Nonsense Mediated Decay (NMD) enhanced by the Exon Junction Complex (EJC)
ENSG00000137154	RPS6	ribosomal protein S6	CHEMBL4297789	MT-3724	FALSE	2	FALSE	Reactome	Nonsense Mediated Decay (NMD) enhanced by the Exon Junction Complex (EJC)
ENSG00000125691	RPL23	ribosomal protein L23	CHEMBL256997	ATALUREN	TRUE	4	FALSE	Reactome	Nonsense Mediated Decay (NMD) enhanced by the Exon Junction Complex (EJC)
ENSG00000125691	RPL23	ribosomal protein L23	CHEMBL4297789	MT-3724	FALSE	2	FALSE	Reactome	Nonsense Mediated Decay (NMD) enhanced by the Exon Junction Complex (EJC)
ENSG00000125691	RPL23	ribosomal protein L23	CHEMBL4297744	ELX-02	FALSE	2	FALSE	Reactome	Nonsense Mediated Decay (NMD) enhanced by the Exon Junction Complex (EJC)
ENSG00000115268	RPS15	ribosomal protein S15	CHEMBL256997	ATALUREN	TRUE	4	FALSE	Reactome	Nonsense Mediated Decay (NMD) enhanced by the Exon Junction Complex (EJC)
ENSG00000115268	RPS15	ribosomal protein S15	CHEMBL4297744	ELX-02	FALSE	2	FALSE	Reactome	Nonsense Mediated Decay (NMD) enhanced by the Exon Junction Complex (EJC)
ENSG00000115268	RPS15	ribosomal protein S15	CHEMBL4297789	MT-3724	FALSE	2	FALSE	Reactome	Nonsense Mediated Decay (NMD) enhanced by the Exon Junction Complex (EJC)
ENSG00000138326	RPS24	ribosomal protein S24	CHEMBL256997	ATALUREN	TRUE	4	FALSE	Reactome	Nonsense Mediated Decay (NMD) enhanced by the Exon Junction Complex (EJC)
ENSG00000138326	RPS24	ribosomal protein S24	CHEMBL4297789	MT-3724	FALSE	2	FALSE	Reactome	Nonsense Mediated Decay (NMD) enhanced by the Exon Junction Complex (EJC)
ENSG00000138326	RPS24	ribosomal protein S24	CHEMBL4297744	ELX-02	FALSE	2	FALSE	Reactome	Nonsense Mediated Decay (NMD) enhanced by the Exon Junction Complex (EJC)
ENSG00000197728	RPS26	ribosomal protein S26	CHEMBL256997	ATALUREN	TRUE	4	FALSE	Reactome	Nonsense Mediated Decay (NMD) enhanced by the Exon Junction Complex (EJC)
ENSG00000197728	RPS26	ribosomal protein S26	CHEMBL4297744	ELX-02	FALSE	2	FALSE	Reactome	Nonsense Mediated Decay (NMD) enhanced by the Exon Junction Complex (EJC)
ENSG00000197728	RPS26	ribosomal protein S26	CHEMBL4297789	MT-3724	FALSE	2	FALSE	Reactome	Nonsense Mediated Decay (NMD) enhanced by the Exon Junction Complex (EJC)
ENSG00000233927	RPS28	ribosomal protein S28	CHEMBL256997	ATALUREN	TRUE	4	FALSE	Reactome	Nonsense Mediated Decay (NMD) enhanced by the Exon Junction Complex (EJC)
ENSG00000233927	RPS28	ribosomal protein S28	CHEMBL4297744	ELX-02	FALSE	2	FALSE	Reactome	Nonsense Mediated Decay (NMD) enhanced by the Exon Junction Complex (EJC)
ENSG00000233927	RPS28	ribosomal protein S28	CHEMBL4297789	MT-3724	FALSE	2	FALSE	Reactome	Nonsense Mediated Decay (NMD) enhanced by the Exon Junction Complex (EJC)
ENSG00000149806	FAU	FAU ubiquitin like and ribosomal protein S30 fusion	CHEMBL256997	ATALUREN	TRUE	4	FALSE	Reactome	Nonsense Mediated Decay (NMD) enhanced by the Exon Junction Complex (EJC)
ENSG00000149806	FAU	FAU ubiquitin like and ribosomal protein S30 fusion	CHEMBL4297744	ELX-02	FALSE	2	FALSE	Reactome	Nonsense Mediated Decay (NMD) enhanced by the Exon Junction Complex (EJC)
ENSG00000149806	FAU	FAU ubiquitin like and ribosomal protein S30 fusion	CHEMBL4297789	MT-3724	FALSE	2	FALSE	Reactome	Nonsense Mediated Decay (NMD) enhanced by the Exon Junction Complex (EJC)
ENSG00000156482	RPL30	ribosomal protein L30	CHEMBL256997	ATALUREN	TRUE	4	FALSE	Reactome	Nonsense Mediated Decay (NMD) enhanced by the Exon Junction Complex (EJC)
ENSG00000156482	RPL30	ribosomal protein L30	CHEMBL4297789	MT-3724	FALSE	2	FALSE	Reactome	Nonsense Mediated Decay (NMD) enhanced by the Exon Junction Complex (EJC)
ENSG00000156482	RPL30	ribosomal protein L30	CHEMBL4297744	ELX-02	FALSE	2	FALSE	Reactome	Nonsense Mediated Decay (NMD) enhanced by the Exon Junction Complex (EJC)
ENSG00000198918	RPL39	ribosomal protein L39	CHEMBL256997	ATALUREN	TRUE	4	FALSE	Reactome	Nonsense Mediated Decay (NMD) enhanced by the Exon Junction Complex (EJC)
ENSG00000198918	RPL39	ribosomal protein L39	CHEMBL4297744	ELX-02	FALSE	2	FALSE	Reactome	Nonsense Mediated Decay (NMD) enhanced by the Exon Junction Complex (EJC)
ENSG00000198918	RPL39	ribosomal protein L39	CHEMBL4297789	MT-3724	FALSE	2	FALSE	Reactome	Nonsense Mediated Decay (NMD) enhanced by the Exon Junction Complex (EJC)
ENSG00000071082	RPL31	ribosomal protein L31	CHEMBL256997	ATALUREN	TRUE	4	FALSE	Reactome	Nonsense Mediated Decay (NMD) enhanced by the Exon Junction Complex (EJC)
ENSG00000071082	RPL31	ribosomal protein L31	CHEMBL4297744	ELX-02	FALSE	2	FALSE	Reactome	Nonsense Mediated Decay (NMD) enhanced by the Exon Junction Complex (EJC)
ENSG00000071082	RPL31	ribosomal protein L31	CHEMBL4297789	MT-3724	FALSE	2	FALSE	Reactome	Nonsense Mediated Decay (NMD) enhanced by the Exon Junction Complex (EJC)
ENSG00000198755	RPL10A	ribosomal protein L10a	CHEMBL256997	ATALUREN	TRUE	4	FALSE	Reactome	Nonsense Mediated Decay (NMD) enhanced by the Exon Junction Complex (EJC)
ENSG00000198755	RPL10A	ribosomal protein L10a	CHEMBL4297789	MT-3724	FALSE	2	FALSE	Reactome	Nonsense Mediated Decay (NMD) enhanced by the Exon Junction Complex (EJC)
ENSG00000198755	RPL10A	ribosomal protein L10a	CHEMBL4297744	ELX-02	FALSE	2	FALSE	Reactome	Nonsense Mediated Decay (NMD) enhanced by the Exon Junction Complex (EJC)
ENSG00000144713	RPL32	ribosomal protein L32	CHEMBL256997	ATALUREN	TRUE	4	FALSE	Reactome	Nonsense Mediated Decay (NMD) enhanced by the Exon Junction Complex (EJC)
ENSG00000144713	RPL32	ribosomal protein L32	CHEMBL4297744	ELX-02	FALSE	2	FALSE	Reactome	Nonsense Mediated Decay (NMD) enhanced by the Exon Junction Complex (EJC)
ENSG00000144713	RPL32	ribosomal protein L32	CHEMBL4297789	MT-3724	FALSE	2	FALSE	Reactome	Nonsense Mediated Decay (NMD) enhanced by the Exon Junction Complex (EJC)
ENSG00000142676	RPL11	ribosomal protein L11	CHEMBL256997	ATALUREN	TRUE	4	FALSE	Reactome	Nonsense Mediated Decay (NMD) enhanced by the Exon Junction Complex (EJC)
ENSG00000142676	RPL11	ribosomal protein L11	CHEMBL4297789	MT-3724	FALSE	2	FALSE	Reactome	Nonsense Mediated Decay (NMD) enhanced by the Exon Junction Complex (EJC)
ENSG00000142676	RPL11	ribosomal protein L11	CHEMBL4297744	ELX-02	FALSE	2	FALSE	Reactome	Nonsense Mediated Decay (NMD) enhanced by the Exon Junction Complex (EJC)
ENSG00000161016	RPL8	ribosomal protein L8	CHEMBL256997	ATALUREN	TRUE	4	FALSE	Reactome	Nonsense Mediated Decay (NMD) enhanced by the Exon Junction Complex (EJC)
ENSG00000161016	RPL8	ribosomal protein L8	CHEMBL4297744	ELX-02	FALSE	2	FALSE	Reactome	Nonsense Mediated Decay (NMD) enhanced by the Exon Junction Complex (EJC)
ENSG00000161016	RPL8	ribosomal protein L8	CHEMBL4297789	MT-3724	FALSE	2	FALSE	Reactome	Nonsense Mediated Decay (NMD) enhanced by the Exon Junction Complex (EJC)
ENSG00000229117	RPL41	ribosomal protein L41	CHEMBL256997	ATALUREN	TRUE	4	FALSE	Reactome	Nonsense Mediated Decay (NMD) enhanced by the Exon Junction Complex (EJC)
ENSG00000229117	RPL41	ribosomal protein L41	CHEMBL4297744	ELX-02	FALSE	2	FALSE	Reactome	Nonsense Mediated Decay (NMD) enhanced by the Exon Junction Complex (EJC)
ENSG00000229117	RPL41	ribosomal protein L41	CHEMBL4297789	MT-3724	FALSE	2	FALSE	Reactome	Nonsense Mediated Decay (NMD) enhanced by the Exon Junction Complex (EJC)
ENSG00000143947	RPS27A	ribosomal protein S27a	CHEMBL256997	ATALUREN	TRUE	4	FALSE	Reactome	Nonsense Mediated Decay (NMD) enhanced by the Exon Junction Complex (EJC)
ENSG00000143947	RPS27A	ribosomal protein S27a	CHEMBL4297744	ELX-02	FALSE	2	FALSE	Reactome	Nonsense Mediated Decay (NMD) enhanced by the Exon Junction Complex (EJC)
ENSG00000143947	RPS27A	ribosomal protein S27a	CHEMBL4297789	MT-3724	FALSE	2	FALSE	Reactome	Nonsense Mediated Decay (NMD) enhanced by the Exon Junction Complex (EJC)
ENSG00000172809	RPL38	ribosomal protein L38	CHEMBL256997	ATALUREN	TRUE	4	FALSE	Reactome	Nonsense Mediated Decay (NMD) enhanced by the Exon Junction Complex (EJC)
[truncated: 3,592 more rows]
