# Supplementary material for: Pathway2Targets: an open-source pathway-based approach to repurpose therapeutic drugs and prioritize human targets
Source: PeerJ. 2023 Sep 29;11:e16088. doi: 10.7717/peerj.16088 (PMC10544355; doi:10.7717/peerj.16088)
Supplement: Supplemental Information 2 [file peerj-11-16088-s002.xlsx]

## Sheet: SuppTable1-DEGs
seqnames	start	end	width	strand	gene_id	gene_name	gene_biotype	seq_coord_system	description	gene_id_version	symbol	entrezid	logFC	logCPM	F	PValue	FDR	mlog10PValue
12	52168996	52192014	23019	-	ENSG00000167767	KRT80	protein_coding	chromosome	keratin 80 [Source:HGNC Symbol;Acc:HGNC:27056]	ENSG00000167767.14	KRT80	144501	4.75	3.64	374	6.42e-42	1.05e-37	41.2
14	22971177	22982551	11375	-	ENSG00000129474	AJUBA	protein_coding	chromosome	ajuba LIM protein [Source:HGNC Symbol;Acc:HGNC:20250]	ENSG00000129474.16	AJUBA	84962	3.36	3.52	338	1.12e-39	9.16e-36	39
5	892884	919357	26474	+	ENSG00000071539	TRIP13	protein_coding	chromosome	thyroid hormone receptor interactor 13 [Source:HGNC Symbol;Acc:HGNC:12307]	ENSG00000071539.14	TRIP13	9319	2.67	3.54	316	3.69e-38	1.82e-34	37.4
4	56435741	56464579	28839	+	ENSG00000128050	PAICS	protein_coding	chromosome	phosphoribosylaminoimidazole carboxylase and phosphoribosylaminoimidazolesuccinocarboxamide synthase [Source:HGNC Symbol;Acc:HGNC:8587]	ENSG00000128050.8	PAICS	10606	1.97	6	314	4.45e-38	1.82e-34	37.4
19	12806556	12815201	8646	+	ENSG00000104889	RNASEH2A	protein_coding	chromosome	ribonuclease H2 subunit A [Source:HGNC Symbol;Acc:HGNC:18518]	ENSG00000104889.6	RNASEH2A	10535	1.97	4.03	306	1.58e-37	5.19e-34	36.8
12	56416363	56449426	33064	-	ENSG00000111602	TIMELESS	protein_coding	chromosome	timeless circadian regulator [Source:HGNC Symbol;Acc:HGNC:11813]	ENSG00000111602.12	TIMELESS	8914	1.94	4.84	303	2.8e-37	6.29e-34	36.6
1	211658657	211675630	16974	-	ENSG00000117650	NEK2	protein_coding	chromosome	NIMA related kinase 2 [Source:HGNC Symbol;Acc:HGNC:7745]	ENSG00000117650.13	NEK2	4751	2.47	3.13	303	2.8e-37	6.29e-34	36.6
X	154762742	154777689	14948	+	ENSG00000130826	DKC1	protein_coding	chromosome	dyskerin pseudouridine synthase 1 [Source:HGNC Symbol;Acc:HGNC:2890]	ENSG00000130826.18	DKC1	1736	2.33	5.98	302	3.07e-37	6.29e-34	36.5
20	34280268	34311802	31535	-	ENSG00000101444	AHCY	protein_coding	chromosome	adenosylhomocysteinase [Source:HGNC Symbol;Acc:HGNC:343]	ENSG00000101444.13	AHCY	191	2.2	7.27	302	3.47e-37	6.33e-34	36.5
16	2429394	2458854	29461	+	ENSG00000162063	CCNF	protein_coding	chromosome	cyclin F [Source:HGNC Symbol;Acc:HGNC:1591]	ENSG00000162063.13	CCNF	899	2.46	3.8	300	4.4e-37	7.21e-34	36.4
20	49046246	49096960	50715	+	ENSG00000124207	CSE1L	protein_coding	chromosome	chromosome segregation 1 like [Source:HGNC Symbol;Acc:HGNC:2431]	ENSG00000124207.17	CSE1L	1434	2.28	5.89	299	5e-37	7.44e-34	36.3
7	74453790	74602604	148815	+	ENSG00000006704	GTF2IRD1	protein_coding	chromosome	GTF2I repeat domain containing 1 [Source:HGNC Symbol;Acc:HGNC:4661]	ENSG00000006704.10	GTF2IRD1	9569	2.75	5.28	296	8.84e-37	1.21e-33	36.1
13	49660674	49691486	30813	-	ENSG00000123179	EBPL	protein_coding	chromosome	EBP like [Source:HGNC Symbol;Acc:HGNC:18061]	ENSG00000123179.14	EBPL	84650	1.45	4.87	291	2.06e-36	2.59e-33	35.7
9	89311195	89316703	5509	+	ENSG00000123975	CKS2	protein_coding	chromosome	CDC28 protein kinase regulatory subunit 2 [Source:HGNC Symbol;Acc:HGNC:2000]	ENSG00000123975.5	CKS2	1164	2.65	4.15	290	2.53e-36	2.82e-33	35.6
8	123319850	123416350	96501	-	ENSG00000156802	ATAD2	protein_coding	chromosome	ATPase family AAA domain containing 2 [Source:HGNC Symbol;Acc:HGNC:30123]	ENSG00000156802.13	ATAD2	29028	2.43	4.5	289	2.58e-36	2.82e-33	35.6
9	130693721	130704894	11174	+	ENSG00000130713	EXOSC2	protein_coding	chromosome	exosome component 2 [Source:HGNC Symbol;Acc:HGNC:17097]	ENSG00000130713.16	EXOSC2	23404	1.23	4.83	288	3.45e-36	3.53e-33	35.5
20	44942130	44960397	18268	-	ENSG00000025772	TOMM34	protein_coding	chromosome	translocase of outer mitochondrial membrane 34 [Source:HGNC Symbol;Acc:HGNC:15746]	ENSG00000025772.8	TOMM34	10953	2.2	5.31	287	3.87e-36	3.73e-33	35.4
6	21593751	21598619	4869	+	ENSG00000124766	SOX4	protein_coding	chromosome	SRY-box transcription factor 4 [Source:HGNC Symbol;Acc:HGNC:11200]	ENSG00000124766.7	SOX4	6659	1.94	6.25	285	5.07e-36	4.62e-33	35.3
7	26201162	26213607	12446	+	ENSG00000122565	CBX3	protein_coding	chromosome	chromobox 3 [Source:HGNC Symbol;Acc:HGNC:1553]	ENSG00000122565.19	CBX3	11335	1.3	6.59	283	7.15e-36	6.17e-33	35.1
9	137582081	137590512	8432	-	ENSG00000165724	ZMYND19	protein_coding	chromosome	zinc finger MYND-type containing 19 [Source:HGNC Symbol;Acc:HGNC:21146]	ENSG00000165724.6	ZMYND19	116225	1.7	4.95	283	7.6e-36	6.23e-33	35.1
6	149724315	149749665	25351	-	ENSG00000120253	NUP43	protein_coding	chromosome	nucleoporin 43 [Source:HGNC Symbol;Acc:HGNC:21182]	ENSG00000120253.14	NUP43	348995	1.16	4.62	281	9.93e-36	7.75e-33	35
12	62643994	62935150	291157	-	ENSG00000111110	PPM1H	protein_coding	chromosome	protein phosphatase, Mg2+/Mn2+ dependent 1H [Source:HGNC Symbol;Acc:HGNC:18583]	ENSG00000111110.12	PPM1H	57460	2.76	3.99	281	1.16e-35	8.63e-33	34.9
3	47585269	47782106	196838	-	ENSG00000173473	SMARCC1	protein_coding	chromosome	SWI/SNF related, matrix associated, actin dependent regulator of chromatin subfamily c member 1 [Source:HGNC Symbol;Acc:HGNC:11104]	ENSG00000173473.11	SMARCC1	6599	1.54	5.97	276	2.43e-35	1.73e-32	34.6
11	6680385	6683340	2956	-	ENSG00000158042	MRPL17	protein_coding	chromosome	mitochondrial ribosomal protein L17 [Source:HGNC Symbol;Acc:HGNC:14053]	ENSG00000158042.9	MRPL17	63875	1.72	4.99	276	2.62e-35	1.79e-32	34.6
19	19201416	19203424	2009	-	ENSG00000184162	NR2C2AP	protein_coding	chromosome	nuclear receptor 2C2 associated protein [Source:HGNC Symbol;Acc:HGNC:30763]	ENSG00000184162.14	NR2C2AP	126382	1.7	4.06	272	4.7e-35	3.08e-32	34.3
6	43522334	43576038	53705	-	ENSG00000124571	XPO5	protein_coding	chromosome	exportin 5 [Source:HGNC Symbol;Acc:HGNC:17675]	ENSG00000124571.18	XPO5	57510	1.68	5.21	271	6.15e-35	3.87e-32	34.2
2	189441446	189475552	34107	+	ENSG00000115368	WDR75	protein_coding	chromosome	WD repeat domain 75 [Source:HGNC Symbol;Acc:HGNC:25725]	ENSG00000115368.10	WDR75	84128	1.29	4.45	271	6.53e-35	3.96e-32	34.2
8	143304384	143359979	55596	-	ENSG00000184428	TOP1MT	protein_coding	chromosome	DNA topoisomerase I mitochondrial [Source:HGNC Symbol;Acc:HGNC:29787]	ENSG00000184428.13	TOP1MT	116447	2.55	5.21	270	6.92e-35	4.05e-32	34.2
12	2857681	2877155	19475	-	ENSG00000111206	FOXM1	protein_coding	chromosome	forkhead box M1 [Source:HGNC Symbol;Acc:HGNC:3818]	ENSG00000111206.12	FOXM1	2305	2.64	5.15	269	8.94e-35	5.05e-32	34
19	42297033	42303546	6514	-	ENSG00000079462	PAFAH1B3	protein_coding	chromosome	platelet activating factor acetylhydrolase 1b catalytic subunit 3 [Source:HGNC Symbol;Acc:HGNC:8576]	ENSG00000079462.7	PAFAH1B3	5050	1.87	4.6	268	1.02e-34	5.57e-32	34
6	43509702	43562419	52718	+	ENSG00000171453	POLR1C	protein_coding	chromosome	RNA polymerase I and III subunit C [Source:HGNC Symbol;Acc:HGNC:20194]	ENSG00000171453.20	POLR1C	9533	1.62	4.71	268	1.08e-34	5.6e-32	34
8	120535745	120813273	277529	-	ENSG00000172164	SNTB1	protein_coding	chromosome	syntrophin beta 1 [Source:HGNC Symbol;Acc:HGNC:11168]	ENSG00000172164.15	SNTB1	6641	2.87	4.67	268	1.09e-34	5.6e-32	34
14	20311368	20333312	21945	-	ENSG00000100814	CCNB1IP1	protein_coding	chromosome	cyclin B1 interacting protein 1 [Source:HGNC Symbol;Acc:HGNC:19437]	ENSG00000100814.18	CCNB1IP1	57820	1.16	4.58	266	1.47e-34	7.3e-32	33.8
2	111611639	111884690	273052	-	ENSG00000153107	ANAPC1	protein_coding	chromosome	anaphase promoting complex subunit 1 [Source:HGNC Symbol;Acc:HGNC:19988]	ENSG00000153107.13	ANAPC1	64682	1.39	5.26	265	1.84e-34	8.69e-32	33.7
14	105009573	105021083	11511	-	ENSG00000170779	CDCA4	protein_coding	chromosome	cell division cycle associated 4 [Source:HGNC Symbol;Acc:HGNC:14625]	ENSG00000170779.11	CDCA4	55038	2.01	3.95	265	1.86e-34	8.69e-32	33.7
15	90966040	90995629	29590	-	ENSG00000198901	PRC1	protein_coding	chromosome	protein regulator of cytokinesis 1 [Source:HGNC Symbol;Acc:HGNC:9341]	ENSG00000198901.14	PRC1	9055	2.47	4.82	264	2.04e-34	9.3e-32	33.7
22	41367333	41399326	31994	+	ENSG00000167074	TEF	protein_coding	chromosome	TEF transcription factor, PAR bZIP family member [Source:HGNC Symbol;Acc:HGNC:11722]	ENSG00000167074.15	TEF	7008	-1.6	4.38	264	2.17e-34	9.59e-32	33.7
20	31739271	31801805	62535	+	ENSG00000088325	TPX2	protein_coding	chromosome	TPX2 microtubule nucleation factor [Source:HGNC Symbol;Acc:HGNC:1249]	ENSG00000088325.16	TPX2	22974	3.4	5.56	263	2.37e-34	1.02e-31	33.6
1	156525405	156572604	47200	-	ENSG00000183856	IQGAP3	protein_coding	chromosome	IQ motif containing GTPase activating protein 3 [Source:HGNC Symbol;Acc:HGNC:20669]	ENSG00000183856.11	IQGAP3	128239	3.07	5.68	263	2.45e-34	1.03e-31	33.6
7	100092728	100101940	9213	-	ENSG00000166508	MCM7	protein_coding	chromosome	minichromosome maintenance complex component 7 [Source:HGNC Symbol;Acc:HGNC:6950]	ENSG00000166508.17	MCM7	4176	1.51	7.22	263	2.52e-34	1.03e-31	33.6
16	68636189	68722616	86428	+	ENSG00000062038	CDH3	protein_coding	chromosome	cadherin 3 [Source:HGNC Symbol;Acc:HGNC:1762]	ENSG00000062038.14	CDH3	1001	2.21	4.76	262	2.73e-34	1.07e-31	33.6
2	173354820	173368997	14178	+	ENSG00000144354	CDCA7	protein_coding	chromosome	cell division cycle associated 7 [Source:HGNC Symbol;Acc:HGNC:14628]	ENSG00000144354.14	CDCA7	83879	3	5.98	262	2.74e-34	1.07e-31	33.6
20	58981208	58995133	13926	+	ENSG00000101158	NELFCD	protein_coding	chromosome	negative elongation factor complex member C/D [Source:HGNC Symbol;Acc:HGNC:15934]	ENSG00000101158.15	NELFCD	51497	1.74	6.35	261	3.26e-34	1.22e-31	33.5
19	50797704	50804929	7226	-	ENSG00000167747	C19orf48	protein_coding	chromosome	chromosome 19 open reading frame 48 [Source:HGNC Symbol;Acc:HGNC:29667]	ENSG00000167747.14	C19orf48	84798	2.46	6.01	261	3.26e-34	1.22e-31	33.5
14	21351476	21384019	32544	-	ENSG00000092201	SUPT16H	protein_coding	chromosome	SPT16 homolog, facilitates chromatin remodeling subunit [Source:HGNC Symbol;Acc:HGNC:11465]	ENSG00000092201.10	SUPT16H	11198	1.1	6.15	261	3.7e-34	1.35e-31	33.4
7	105439661	105522271	82611	-	ENSG00000091127	PUS7	protein_coding	chromosome	pseudouridine synthase 7 [Source:HGNC Symbol;Acc:HGNC:26033]	ENSG00000091127.14	PUS7	54517	2.71	3.6	260	4.04e-34	1.44e-31	33.4
6	52264014	52284881	20868	-	ENSG00000112118	MCM3	protein_coding	chromosome	minichromosome maintenance complex component 3 [Source:HGNC Symbol;Acc:HGNC:6945]	ENSG00000112118.20	MCM3	4172	1.99	6.18	260	4.2e-34	1.46e-31	33.4
5	177446445	177456286	9842	+	ENSG00000131188	PRR7	protein_coding	chromosome	proline rich 7, synaptic [Source:HGNC Symbol;Acc:HGNC:28130]	ENSG00000131188.12	PRR7	80758	2.88	3.57	259	4.85e-34	1.66e-31	33.3
9	136401922	136410614	8693	-	ENSG00000165689	ENTR1	protein_coding	chromosome	endosome associated trafficking regulator 1 [Source:HGNC Symbol;Acc:HGNC:10667]	ENSG00000165689.17	ENTR1	10807	1.39	5.33	258	6.02e-34	2.01e-31	33.2
7	36389821	36453791	63971	+	ENSG00000011426	ANLN	protein_coding	chromosome	anillin actin binding protein [Source:HGNC Symbol;Acc:HGNC:14082]	ENSG00000011426.11	ANLN	54443	3.17	4.26	257	6.61e-34	2.16e-31	33.2
20	62796473	62801729	5257	+	ENSG00000101189	MRGBP	protein_coding	chromosome	MRG domain binding protein [Source:HGNC Symbol;Acc:HGNC:15866]	ENSG00000101189.7	MRGBP	55257	1.62	4.63	256	7.92e-34	2.52e-31	33.1
11	125625665	125676255	50591	+	ENSG00000149554	CHEK1	protein_coding	chromosome	checkpoint kinase 1 [Source:HGNC Symbol;Acc:HGNC:1925]	ENSG00000149554.13	CHEK1	1111	2.14	3.5	256	8e-34	2.52e-31	33.1
8	144137774	144140851	3078	+	ENSG00000235173	HGH1	protein_coding	chromosome	HGH1 homolog [Source:HGNC Symbol;Acc:HGNC:24161]	ENSG00000235173.7	HGH1	51236	1.95	5.15	256	8.83e-34	2.73e-31	33.1
9	132592997	132670401	77405	-	ENSG00000125485	DDX31	protein_coding	chromosome	DEAD-box helicase 31 [Source:HGNC Symbol;Acc:HGNC:16715]	ENSG00000125485.17	DDX31	64794	1.79	3.89	256	9.02e-34	2.73e-31	33
3	127598410	127622436	24027	+	ENSG00000073111	MCM2	protein_coding	chromosome	minichromosome maintenance complex component 2 [Source:HGNC Symbol;Acc:HGNC:6944]	ENSG00000073111.14	MCM2	4171	2.5	5.08	256	9.18e-34	2.73e-31	33
X	48476021	48486364	10344	+	ENSG00000068438	FTSJ1	protein_coding	chromosome	FtsJ RNA 2'-O-methyltransferase 1 [Source:HGNC Symbol;Acc:HGNC:13254]	ENSG00000068438.15	FTSJ1	24140	1.31	4.61	256	9.42e-34	2.76e-31	33
7	138831381	138981318	149938	-	ENSG00000122778	KIAA1549	protein_coding	chromosome	KIAA1549 [Source:HGNC Symbol;Acc:HGNC:22219]	ENSG00000122778.9	KIAA1549	57670	3	3.3	255	9.93e-34	2.85e-31	33
9	113407235	113410675	3441	-	ENSG00000148229	POLE3	protein_coding	chromosome	DNA polymerase epsilon 3, accessory subunit [Source:HGNC Symbol;Acc:HGNC:13546]	ENSG00000148229.13	POLE3	54107	1.39	5.09	255	1.09e-33	3.07e-31	33
7	44114681	44124358	9678	-	ENSG00000106628	POLD2	protein_coding	chromosome	DNA polymerase delta 2, accessory subunit [Source:HGNC Symbol;Acc:HGNC:9176]	ENSG00000106628.10	POLD2	5425	2.01	6.24	254	1.29e-33	3.49e-31	32.9
8	143734140	143790644	56505	+	ENSG00000203499	IQANK1	protein_coding	chromosome	IQ motif and ankyrin repeat containing 1 [Source:HGNC Symbol;Acc:HGNC:49576]	ENSG00000203499.11	IQANK1	NA	2.65	4.09	254	1.29e-33	3.49e-31	32.9
17	48048329	48061545	13217	+	ENSG00000082641	NFE2L1	protein_coding	chromosome	nuclear factor, erythroid 2 like 1 [Source:HGNC Symbol;Acc:HGNC:7781]	ENSG00000082641.16	NFE2L1	4779	-1.22	8.25	254	1.31e-33	3.49e-31	32.9
22	41245611	41286251	40641	-	ENSG00000100401	RANGAP1	protein_coding	chromosome	Ran GTPase activating protein 1 [Source:HGNC Symbol;Acc:HGNC:9854]	ENSG00000100401.19	RANGAP1	5905	1.55	6.58	254	1.32e-33	3.49e-31	32.9
8	103414714	103443453	28740	+	ENSG00000164934	DCAF13	protein_coding	chromosome	DDB1 and CUL4 associated factor 13 [Source:HGNC Symbol;Acc:HGNC:24535]	ENSG00000164934.14	DCAF13	25879	1.97	4.66	253	1.47e-33	3.82e-31	32.8
7	56051685	56063989	12305	+	ENSG00000146731	CCT6A	protein_coding	chromosome	chaperonin containing TCP1 subunit 6A [Source:HGNC Symbol;Acc:HGNC:1620]	ENSG00000146731.11	CCT6A	908	1.69	6.77	253	1.5e-33	3.83e-31	32.8
1	109279556	109283186	3631	-	ENSG00000134222	PSRC1	protein_coding	chromosome	proline and serine rich coiled-coil 1 [Source:HGNC Symbol;Acc:HGNC:24472]	ENSG00000134222.16	PSRC1	84722	2.33	3.06	253	1.54e-33	3.83e-31	32.8
11	65066300	65084164	17865	-	ENSG00000146670	CDCA5	protein_coding	chromosome	cell division cycle associated 5 [Source:HGNC Symbol;Acc:HGNC:14626]	ENSG00000146670.10	CDCA5	113130	2.9	4.5	253	1.54e-33	3.83e-31	32.8
21	43789513	43805293	15781	+	ENSG00000160214	RRP1	protein_coding	chromosome	ribosomal RNA processing 1 [Source:HGNC Symbol;Acc:HGNC:18785]	ENSG00000160214.13	RRP1	8568	1.96	5.12	253	1.61e-33	3.92e-31	32.8
7	26152198	26187137	34940	+	ENSG00000050344	NFE2L3	protein_coding	chromosome	nuclear factor, erythroid 2 like 3 [Source:HGNC Symbol;Acc:HGNC:7783]	ENSG00000050344.9	NFE2L3	9603	1.96	5.51	253	1.63e-33	3.92e-31	32.8
2	112541915	112577150	35236	+	ENSG00000125630	POLR1B	protein_coding	chromosome	RNA polymerase I subunit B [Source:HGNC Symbol;Acc:HGNC:20454]	ENSG00000125630.15	POLR1B	84172	1.96	4.23	251	2.24e-33	5.31e-31	32.7
19	55399745	55407788	8044	-	ENSG00000108106	UBE2S	protein_coding	chromosome	ubiquitin conjugating enzyme E2 S [Source:HGNC Symbol;Acc:HGNC:17895]	ENSG00000108106.14	UBE2S	27338	2.32	6.29	250	2.51e-33	5.88e-31	32.6
9	137062127	137070557	8431	-	ENSG00000186193	SAPCD2	protein_coding	chromosome	suppressor APC domain containing 2 [Source:HGNC Symbol;Acc:HGNC:28055]	ENSG00000186193.9	SAPCD2	89958	3.14	6.04	250	2.63e-33	5.95e-31	32.6
7	135557917	135648757	90841	+	ENSG00000155561	NUP205	protein_coding	chromosome	nucleoporin 205 [Source:HGNC Symbol;Acc:HGNC:18658]	ENSG00000155561.15	NUP205	23165	1.33	5.18	250	2.65e-33	5.95e-31	32.6
16	2969270	2973484	4215	+	ENSG00000162073	PAQR4	protein_coding	chromosome	progestin and adipoQ receptor family member 4 [Source:HGNC Symbol;Acc:HGNC:26386]	ENSG00000162073.14	PAQR4	124222	2.42	4.97	250	2.65e-33	5.95e-31	32.6
3	128064778	128153914	89137	-	ENSG00000175792	RUVBL1	protein_coding	chromosome	RuvB like AAA ATPase 1 [Source:HGNC Symbol;Acc:HGNC:10474]	ENSG00000175792.12	RUVBL1	8607	1.47	4.86	250	2.7e-33	5.98e-31	32.6
9	134135365	134159968	24604	+	ENSG00000196363	WDR5	protein_coding	chromosome	WD repeat domain 5 [Source:HGNC Symbol;Acc:HGNC:12757]	ENSG00000196363.9	WDR5	11091	1.46	5.54	249	2.88e-33	6.28e-31	32.5
17	44924709	44947773	23065	-	ENSG00000186185	KIF18B	protein_coding	chromosome	kinesin family member 18B [Source:HGNC Symbol;Acc:HGNC:27102]	ENSG00000186185.14	KIF18B	146909	2.47	4.28	249	2.97e-33	6.33e-31	32.5
16	3953387	4116442	163056	-	ENSG00000162104	ADCY9	protein_coding	chromosome	adenylate cyclase 9 [Source:HGNC Symbol;Acc:HGNC:240]	ENSG00000162104.10	ADCY9	115	-1.62	5.17	249	2.99e-33	6.33e-31	32.5
8	47960185	47978160	17976	+	ENSG00000104738	MCM4	protein_coding	chromosome	minichromosome maintenance complex component 4 [Source:HGNC Symbol;Acc:HGNC:6947]	ENSG00000104738.18	MCM4	4173	2.37	6.13	249	3.01e-33	6.33e-31	32.5
16	69741871	69754926	13056	-	ENSG00000141101	NOB1	protein_coding	chromosome	NIN1 (RPN12) binding protein 1 homolog [Source:HGNC Symbol;Acc:HGNC:29540]	ENSG00000141101.13	NOB1	28987	1.75	5.56	249	3.26e-33	6.77e-31	32.5
X	71283192	71301168	17977	+	ENSG00000147140	NONO	protein_coding	chromosome	non-POU domain containing octamer binding [Source:HGNC Symbol;Acc:HGNC:7871]	ENSG00000147140.16	NONO	4841	1.21	7.72	249	3.38e-33	6.92e-31	32.5
19	45406209	45410766	4558	+	ENSG00000117877	CD3EAP	protein_coding	chromosome	CD3e molecule associated protein [Source:HGNC Symbol;Acc:HGNC:24219]	ENSG00000117877.10	CD3EAP	10849	2.54	3.37	248	3.74e-33	7.57e-31	32.4
12	130872037	130877678	5642	+	ENSG00000132341	RAN	protein_coding	chromosome	RAN, member RAS oncogene family [Source:HGNC Symbol;Acc:HGNC:9846]	ENSG00000132341.12	RAN	5901	1.59	7.33	247	4.22e-33	8.43e-31	32.4
15	89575469	89631056	55588	+	ENSG00000140534	TICRR	protein_coding	chromosome	TOPBP1 interacting checkpoint and replication regulator [Source:HGNC Symbol;Acc:HGNC:28704]	ENSG00000140534.14	TICRR	90381	2.5	3.25	247	4.43e-33	8.74e-31	32.4
X	129906121	129929761	23641	+	ENSG00000156697	UTP14A	protein_coding	chromosome	UTP14A small subunit processome component [Source:HGNC Symbol;Acc:HGNC:10665]	ENSG00000156697.13	UTP14A	10813	2.04	4.49	247	4.71e-33	9.07e-31	32.3
1	42658423	42676758	18336	+	ENSG00000171960	PPIH	protein_coding	chromosome	peptidylprolyl isomerase H [Source:HGNC Symbol;Acc:HGNC:14651]	ENSG00000171960.11	PPIH	10465	1.45	4.03	247	4.72e-33	9.07e-31	32.3
16	70523791	70577670	53880	+	ENSG00000189091	SF3B3	protein_coding	chromosome	splicing factor 3b subunit 3 [Source:HGNC Symbol;Acc:HGNC:10770]	ENSG00000189091.13	SF3B3	23450	1.43	6.47	247	4.76e-33	9.07e-31	32.3
9	78297125	78330093	32969	+	ENSG00000135069	PSAT1	protein_coding	chromosome	phosphoserine aminotransferase 1 [Source:HGNC Symbol;Acc:HGNC:19129]	ENSG00000135069.14	PSAT1	29968	3.28	3.9	246	5.48e-33	1.03e-30	32.3
7	139133744	139191986	58243	+	ENSG00000105948	TTC26	protein_coding	chromosome	tetratricopeptide repeat domain 26 [Source:HGNC Symbol;Acc:HGNC:21882]	ENSG00000105948.13	TTC26	79989	2.08	1.7	245	6.75e-33	1.26e-30	32.2
19	49665142	49673916	8775	+	ENSG00000126453	BCL2L12	protein_coding	chromosome	BCL2 like 12 [Source:HGNC Symbol;Acc:HGNC:13787]	ENSG00000126453.9	BCL2L12	83596	1.71	4.37	244	7.45e-33	1.37e-30	32.1
19	7868719	7874390	5672	-	ENSG00000183248	PRR36	protein_coding	chromosome	proline rich 36 [Source:HGNC Symbol;Acc:HGNC:26172]	ENSG00000183248.12	PRR36	80164	3.8	3.05	244	7.73e-33	1.41e-30	32.1
17	72121020	72126416	5397	+	ENSG00000125398	SOX9	protein_coding	chromosome	SRY-box transcription factor 9 [Source:HGNC Symbol;Acc:HGNC:11204]	ENSG00000125398.8	SOX9	6662	2.33	6.37	244	8.32e-33	1.48e-30	32.1
20	45812576	45816957	4382	+	ENSG00000175063	UBE2C	protein_coding	chromosome	ubiquitin conjugating enzyme E2 C [Source:HGNC Symbol;Acc:HGNC:15937]	ENSG00000175063.17	UBE2C	11065	3.27	5.25	244	8.33e-33	1.48e-30	32.1
17	78214186	78225636	11451	+	ENSG00000089685	BIRC5	protein_coding	chromosome	baculoviral IAP repeat containing 5 [Source:HGNC Symbol;Acc:HGNC:593]	ENSG00000089685.15	BIRC5	332	1.63	4.89	243	8.67e-33	1.53e-30	32.1
9	33921693	34048949	127257	-	ENSG00000137073	UBAP2	protein_coding	chromosome	ubiquitin associated protein 2 [Source:HGNC Symbol;Acc:HGNC:14185]	ENSG00000137073.21	UBAP2	55833	1.11	5.33	243	8.85e-33	1.54e-30	32.1
7	30594838	30634033	39196	+	ENSG00000106105	GARS	protein_coding	chromosome	glycyl-tRNA synthetase [Source:HGNC Symbol;Acc:HGNC:4162]	ENSG00000106105.14	GARS	2617	1.68	6.03	243	9.16e-33	1.58e-30	32
3	190305707	190322446	16740	-	ENSG00000163347	CLDN1	protein_coding	chromosome	claudin 1 [Source:HGNC Symbol;Acc:HGNC:2032]	ENSG00000163347.6	CLDN1	9076	4.56	4.52	243	1e-32	1.71e-30	32
X	119588337	119606443	18107	-	ENSG00000186416	NKRF	protein_coding	chromosome	NFKB repressing factor [Source:HGNC Symbol;Acc:HGNC:19374]	ENSG00000186416.15	NKRF	55922	1.82	3.45	242	1.08e-32	1.82e-30	32
12	102073103	102120120	47018	-	ENSG00000075188	NUP37	protein_coding	chromosome	nucleoporin 37 [Source:HGNC Symbol;Acc:HGNC:29929]	ENSG00000075188.9	NUP37	79023	1.48	3.53	242	1.09e-32	1.82e-30	32
5	74627406	74641424	14019	-	ENSG00000171617	ENC1	protein_coding	chromosome	ectodermal-neural cortex 1 [Source:HGNC Symbol;Acc:HGNC:3345]	ENSG00000171617.14	ENC1	8507	2.1	6.62	241	1.35e-32	2.23e-30	31.9
2	241675747	241686944	11198	-	ENSG00000168393	DTYMK	protein_coding	chromosome	deoxythymidylate kinase [Source:HGNC Symbol;Acc:HGNC:3061]	ENSG00000168393.13	DTYMK	1841	1.78	4.7	241	1.36e-32	2.23e-30	31.9
12	57747727	57756013	8287	-	ENSG00000135446	CDK4	protein_coding	chromosome	cyclin dependent kinase 4 [Source:HGNC Symbol;Acc:HGNC:1773]	ENSG00000135446.17	CDK4	1019	1.94	6.19	241	1.39e-32	2.26e-30	31.9
11	2268495	2270952	2458	-	ENSG00000183734	ASCL2	protein_coding	chromosome	achaete-scute family bHLH transcription factor 2 [Source:HGNC Symbol;Acc:HGNC:739]	ENSG00000183734.4	ASCL2	430	3.96	6.91	241	1.4e-32	2.26e-30	31.9
12	49976923	50033136	56214	-	ENSG00000161800	RACGAP1	protein_coding	chromosome	Rac GTPase activating protein 1 [Source:HGNC Symbol;Acc:HGNC:9804]	ENSG00000161800.13	RACGAP1	29127	2.18	4.51	240	1.54e-32	2.45e-30	31.8
2	17539126	17657018	117893	+	ENSG00000163032	VSNL1	protein_coding	chromosome	visinin like 1 [Source:HGNC Symbol;Acc:HGNC:12722]	ENSG00000163032.12	VSNL1	7447	2.58	3.07	240	1.75e-32	2.75e-30	31.8
1	155002630	155018522	15893	+	ENSG00000160685	ZBTB7B	protein_coding	chromosome	zinc finger and BTB domain containing 7B [Source:HGNC Symbol;Acc:HGNC:18668]	ENSG00000160685.13	ZBTB7B	51043	-1.84	8.11	240	1.76e-32	2.75e-30	31.8
15	80779343	80951776	172434	+	ENSG00000103888	CEMIP	protein_coding	chromosome	cell migration inducing hyaluronidase 1 [Source:HGNC Symbol;Acc:HGNC:29213]	ENSG00000103888.17	CEMIP	57214	3.91	5.4	239	1.84e-32	2.84e-30	31.7
20	33675477	33686385	10909	-	ENSG00000101412	E2F1	protein_coding	chromosome	E2F transcription factor 1 [Source:HGNC Symbol;Acc:HGNC:3113]	ENSG00000101412.13	E2F1	1869	2.57	4.78	239	1.98e-32	3.03e-30	31.7
1	202331657	202341980	10324	-	ENSG00000077152	UBE2T	protein_coding	chromosome	ubiquitin conjugating enzyme E2 T [Source:HGNC Symbol;Acc:HGNC:25009]	ENSG00000077152.11	UBE2T	29089	2.56	3.21	239	2.12e-32	3.21e-30	31.7
2	233833416	233854566	21151	-	ENSG00000123485	HJURP	protein_coding	chromosome	Holliday junction recognition protein [Source:HGNC Symbol;Acc:HGNC:25444]	ENSG00000123485.12	HJURP	55355	2.46	3.88	239	2.17e-32	3.27e-30	31.7
16	87830023	87869507	39485	-	ENSG00000103257	SLC7A5	protein_coding	chromosome	solute carrier family 7 member 5 [Source:HGNC Symbol;Acc:HGNC:11063]	ENSG00000103257.9	SLC7A5	8140	3.05	6.15	238	2.32e-32	3.45e-30	31.6
19	9560353	9584533	24181	-	ENSG00000197961	ZNF121	protein_coding	chromosome	zinc finger protein 121 [Source:HGNC Symbol;Acc:HGNC:12904]	ENSG00000197961.11	ZNF121	7675	1.63	4.71	238	2.49e-32	3.67e-30	31.6
12	57229573	57234935	5363	+	ENSG00000182199	SHMT2	protein_coding	chromosome	serine hydroxymethyltransferase 2 [Source:HGNC Symbol;Acc:HGNC:10852]	ENSG00000182199.11	SHMT2	6472	1.97	6.1	238	2.6e-32	3.79e-30	31.6
12	71439798	71586310	146513	+	ENSG00000139292	LGR5	protein_coding	chromosome	leucine rich repeat containing G protein-coupled receptor 5 [Source:HGNC Symbol;Acc:HGNC:4504]	ENSG00000139292.13	LGR5	8549	4.18	4.97	238	2.61e-32	3.79e-30	31.6
6	150865549	151101887	236339	+	ENSG00000120254	MTHFD1L	protein_coding	chromosome	methylenetetrahydrofolate dehydrogenase (NADP+ dependent) 1 like [Source:HGNC Symbol;Acc:HGNC:21055]	ENSG00000120254.15	MTHFD1L	25902	2.64	4.42	238	2.65e-32	3.8e-30	31.6
13	33818069	33966558	148490	+	ENSG00000133119	RFC3	protein_coding	chromosome	replication factor C subunit 3 [Source:HGNC Symbol;Acc:HGNC:9971]	ENSG00000133119.13	RFC3	5983	2.7	3.41	237	2.67e-32	3.8e-30	31.6
8	100685816	100722809	36994	-	ENSG00000070756	PABPC1	protein_coding	chromosome	poly(A) binding protein cytoplasmic 1 [Source:HGNC Symbol;Acc:HGNC:8554]	ENSG00000070756.16	PABPC1	26986	1.49	9.79	237	2.85e-32	4.03e-30	31.5
12	123602077	123620943	18867	+	ENSG00000111364	DDX55	protein_coding	chromosome	DEAD-box helicase 55 [Source:HGNC Symbol;Acc:HGNC:20085]	ENSG00000111364.16	DDX55	57696	1.26	4.54	237	2.96e-32	4.14e-30	31.5
13	52455429	52476628	21200	+	ENSG00000136108	CKAP2	protein_coding	chromosome	cytoskeleton associated protein 2 [Source:HGNC Symbol;Acc:HGNC:1990]	ENSG00000136108.15	CKAP2	26586	2.3	3.99	237	3.04e-32	4.22e-30	31.5
1	225845536	225882380	36845	-	ENSG00000196187	TMEM63A	protein_coding	chromosome	transmembrane protein 63A [Source:HGNC Symbol;Acc:HGNC:29118]	ENSG00000196187.12	TMEM63A	9725	1.47	7.58	236	3.46e-32	4.77e-30	31.5
2	27217369	27243943	26575	+	ENSG00000084774	CAD	protein_coding	chromosome	carbamoyl-phosphate synthetase 2, aspartate transcarbamylase, and dihydroorotase [Source:HGNC Symbol;Acc:HGNC:1424]	ENSG00000084774.14	CAD	790	1.74	5.77	236	3.72e-32	5.08e-30	31.4
16	4257186	4273075	15890	-	ENSG00000090447	TFAP4	protein_coding	chromosome	transcription factor AP-4 [Source:HGNC Symbol;Acc:HGNC:11745]	ENSG00000090447.12	TFAP4	7023	1.99	4.1	236	3.83e-32	5.19e-30	31.4
20	36751791	36773818	22028	-	ENSG00000149636	DSN1	protein_coding	chromosome	DSN1 component of MIS12 kinetochore complex [Source:HGNC Symbol;Acc:HGNC:16165]	ENSG00000149636.15	DSN1	79980	1.55	3.99	235	3.96e-32	5.29e-30	31.4
10	93496612	93529092	32481	+	ENSG00000138180	CEP55	protein_coding	chromosome	centrosomal protein 55 [Source:HGNC Symbol;Acc:HGNC:1161]	ENSG00000138180.16	CEP55	55165	2.76	3.63	235	3.99e-32	5.29e-30	31.4
2	26764289	26801067	36779	+	ENSG00000115163	CENPA	protein_coding	chromosome	centromere protein A [Source:HGNC Symbol;Acc:HGNC:1851]	ENSG00000115163.15	CENPA	1058	2.84	2.37	235	4.01e-32	5.29e-30	31.4
22	20115938	20127355	11418	+	ENSG00000099901	RANBP1	protein_coding	chromosome	RAN binding protein 1 [Source:HGNC Symbol;Acc:HGNC:9847]	ENSG00000099901.17	RANBP1	5902	1.68	5.98	234	4.73e-32	6.2e-30	31.3
17	28319200	28328685	9486	+	ENSG00000109084	TMEM97	protein_coding	chromosome	transmembrane protein 97 [Source:HGNC Symbol;Acc:HGNC:28106]	ENSG00000109084.14	TMEM97	27346	2.53	4.35	234	5.26e-32	6.84e-30	31.3
22	41469117	41528989	59873	+	ENSG00000100412	ACO2	protein_coding	chromosome	aconitase 2 [Source:HGNC Symbol;Acc:HGNC:118]	ENSG00000100412.16	ACO2	50	-1.17	7.51	233	6e-32	7.73e-30	31.2
1	156035299	156053798	18500	-	ENSG00000160803	UBQLN4	protein_coding	chromosome	ubiquilin 4 [Source:HGNC Symbol;Acc:HGNC:1237]	ENSG00000160803.8	UBQLN4	56893	1.35	5.59	233	6.04e-32	7.73e-30	31.2
12	64404392	64451125	46734	+	ENSG00000184575	XPOT	protein_coding	chromosome	exportin for tRNA [Source:HGNC Symbol;Acc:HGNC:12826]	ENSG00000184575.12	XPOT	11260	1.64	5.48	233	6.57e-32	8.34e-30	31.2
14	54396849	54420218	23370	+	ENSG00000100526	CDKN3	protein_coding	chromosome	cyclin dependent kinase inhibitor 3 [Source:HGNC Symbol;Acc:HGNC:1791]	ENSG00000100526.20	CDKN3	1033	2.81	2.81	232	7.64e-32	9.63e-30	31.1
15	40382721	40394246	11526	+	ENSG00000128944	KNSTRN	protein_coding	chromosome	kinetochore localized astrin (SPAG5) binding protein [Source:HGNC Symbol;Acc:HGNC:30767]	ENSG00000128944.13	KNSTRN	90417	2.08	3.08	232	7.75e-32	9.69e-30	31.1
1	156308968	156367873	58906	-	ENSG00000163468	CCT3	protein_coding	chromosome	chaperonin containing TCP1 subunit 3 [Source:HGNC Symbol;Acc:HGNC:1616]	ENSG00000163468.15	CCT3	7203	1.29	7.32	232	8.09e-32	9.98e-30	31.1
16	58515479	58521181	5703	+	ENSG00000103037	SETD6	protein_coding	chromosome	SET domain containing 6, protein lysine methyltransferase [Source:HGNC Symbol;Acc:HGNC:26116]	ENSG00000103037.11	SETD6	79918	1.39	4.06	232	8.1e-32	9.98e-30	31.1
1	44739818	44767767	27950	+	ENSG00000142945	KIF2C	protein_coding	chromosome	kinesin family member 2C [Source:HGNC Symbol;Acc:HGNC:6393]	ENSG00000142945.13	KIF2C	11004	2.78	4.1	231	9.73e-32	1.19e-29	31
17	75941507	75979177	37671	-	ENSG00000161533	ACOX1	protein_coding	chromosome	acyl-CoA oxidase 1 [Source:HGNC Symbol;Acc:HGNC:119]	ENSG00000161533.12	ACOX1	51	-1.85	7.03	231	9.95e-32	1.2e-29	31
3	184249650	184259585	9936	+	ENSG00000284753	EEF1AKMT4	protein_coding	chromosome	EEF1A lysine methyltransferase 4 [Source:HGNC Symbol;Acc:HGNC:53611]	ENSG00000284753.1	EEF1AKMT4	110599564	2.14	3.03	231	9.99e-32	1.2e-29	31
8	143368876	143384221	15346	+	ENSG00000158106	RHPN1	protein_coding	chromosome	rhophilin Rho GTPase binding protein 1 [Source:HGNC Symbol;Acc:HGNC:19973]	ENSG00000158106.14	RHPN1	114822	2.78	5.85	230	1.08e-31	1.29e-29	31
3	179562886	179588407	25522	+	ENSG00000136518	ACTL6A	protein_coding	chromosome	actin like 6A [Source:HGNC Symbol;Acc:HGNC:24124]	ENSG00000136518.17	ACTL6A	86	1.33	4.79	230	1.1e-31	1.31e-29	31
9	78236062	78279690	43629	+	ENSG00000148019	CEP78	protein_coding	chromosome	centrosomal protein 78 [Source:HGNC Symbol;Acc:HGNC:25740]	ENSG00000148019.13	CEP78	84131	1.85	3.63	230	1.17e-31	1.38e-29	30.9
19	14119512	14136613	17102	-	ENSG00000105011	ASF1B	protein_coding	chromosome	anti-silencing function 1B histone chaperone [Source:HGNC Symbol;Acc:HGNC:20996]	ENSG00000105011.9	ASF1B	55723	2.31	4.29	230	1.22e-31	1.42e-29	30.9
16	1678256	1702280	24025	+	ENSG00000206053	JPT2	protein_coding	chromosome	Jupiter microtubule associated homolog 2 [Source:HGNC Symbol;Acc:HGNC:14137]	ENSG00000206053.13	JPT2	90861	1.51	5.92	229	1.33e-31	1.55e-29	30.9
7	156949712	156973176	23465	+	ENSG00000146909	NOM1	protein_coding	chromosome	nucleolar protein with MIF4G domain 1 [Source:HGNC Symbol;Acc:HGNC:13244]	ENSG00000146909.8	NOM1	64434	1.53	4.6	229	1.36e-31	1.56e-29	30.9
1	214281102	214337131	56030	+	ENSG00000143499	SMYD2	protein_coding	chromosome	SET and MYND domain containing 2 [Source:HGNC Symbol;Acc:HGNC:20982]	ENSG00000143499.14	SMYD2	56950	1.22	4.59	229	1.42e-31	1.62e-29	30.8
1	28505943	28539300	33358	+	ENSG00000180198	RCC1	protein_coding	chromosome	regulator of chromosome condensation 1 [Source:HGNC Symbol;Acc:HGNC:1913]	ENSG00000180198.16	RCC1	1104	1.7	5.34	228	1.57e-31	1.79e-29	30.8
12	109850945	109880541	29597	-	ENSG00000139433	GLTP	protein_coding	chromosome	glycolipid transfer protein [Source:HGNC Symbol;Acc:HGNC:24867]	ENSG00000139433.10	GLTP	51228	-1.66	6.05	228	1.71e-31	1.94e-29	30.8
X	48695554	48709012	13459	+	ENSG00000101945	SUV39H1	protein_coding	chromosome	suppressor of variegation 3-9 homolog 1 [Source:HGNC Symbol;Acc:HGNC:11479]	ENSG00000101945.16	SUV39H1	6839	1.64	3.42	228	1.77e-31	1.99e-29	30.8
2	231706895	231713541	6647	+	ENSG00000187514	PTMA	protein_coding	chromosome	prothymosin alpha [Source:HGNC Symbol;Acc:HGNC:9623]	ENSG00000187514.16	PTMA	5757	1.09	9.88	228	1.82e-31	2.03e-29	30.7
10	114239254	114294489	55236	+	ENSG00000165816	VWA2	protein_coding	chromosome	von Willebrand factor A domain containing 2 [Source:HGNC Symbol;Acc:HGNC:24709]	ENSG00000165816.13	VWA2	340706	3.79	4.28	227	1.84e-31	2.03e-29	30.7
3	49828601	49856574	27974	-	ENSG00000183763	TRAIP	protein_coding	chromosome	TRAF interacting protein [Source:HGNC Symbol;Acc:HGNC:30764]	ENSG00000183763.9	TRAIP	10293	2.09	2.55	227	1.86e-31	2.04e-29	30.7
1	154974653	154979251	4599	+	ENSG00000173207	CKS1B	protein_coding	chromosome	CDC28 protein kinase regulatory subunit 1B [Source:HGNC Symbol;Acc:HGNC:19083]	ENSG00000173207.13	CKS1B	1163	1.37	4.72	227	1.95e-31	2.13e-29	30.7
3	155870650	155944020	73371	+	ENSG00000163655	GMPS	protein_coding	chromosome	guanine monophosphate synthase [Source:HGNC Symbol;Acc:HGNC:4378]	ENSG00000163655.16	GMPS	8833	1.59	4.92	227	1.98e-31	2.15e-29	30.7
17	68035708	68046854	11147	+	ENSG00000182481	KPNA2	protein_coding	chromosome	karyopherin subunit alpha 2 [Source:HGNC Symbol;Acc:HGNC:6395]	ENSG00000182481.9	KPNA2	3838	1.93	5.49	227	2.03e-31	2.18e-29	30.7
12	56309842	56316119	6278	-	ENSG00000257727	CNPY2	protein_coding	chromosome	canopy FGF signaling regulator 2 [Source:HGNC Symbol;Acc:HGNC:13529]	ENSG00000257727.6	CNPY2	10330	1.01	5.6	227	2.03e-31	2.18e-29	30.7
20	362835	397559	34725	+	ENSG00000101255	TRIB3	protein_coding	chromosome	tribbles pseudokinase 3 [Source:HGNC Symbol;Acc:HGNC:16228]	ENSG00000101255.11	TRIB3	57761	3.02	5	226	2.34e-31	2.49e-29	30.6
7	2354086	2380745	26660	+	ENSG00000106263	EIF3B	protein_coding	chromosome	eukaryotic translation initiation factor 3 subunit B [Source:HGNC Symbol;Acc:HGNC:3280]	ENSG00000106263.18	EIF3B	8662	1.57	7.73	226	2.35e-31	2.49e-29	30.6
16	88803789	88809258	5470	+	ENSG00000167513	CDT1	protein_coding	chromosome	chromatin licensing and DNA replication factor 1 [Source:HGNC Symbol;Acc:HGNC:24576]	ENSG00000167513.9	CDT1	81620	2.64	4.63	226	2.39e-31	2.51e-29	30.6
9	113275343	113292905	17563	+	ENSG00000136875	PRPF4	protein_coding	chromosome	pre-mRNA processing factor 4 [Source:HGNC Symbol;Acc:HGNC:17349]	ENSG00000136875.12	PRPF4	9128	1.27	4.48	225	2.7e-31	2.82e-29	30.6
1	154405193	154469450	64258	+	ENSG00000160712	IL6R	protein_coding	chromosome	interleukin 6 receptor [Source:HGNC Symbol;Acc:HGNC:6019]	ENSG00000160712.13	IL6R	3570	-2.3	5.34	225	2.72e-31	2.82e-29	30.6
3	49024325	49029408	5084	-	ENSG00000178035	IMPDH2	protein_coding	chromosome	inosine monophosphate dehydrogenase 2 [Source:HGNC Symbol;Acc:HGNC:6053]	ENSG00000178035.12	IMPDH2	3615	1.74	6.76	225	2.83e-31	2.91e-29	30.5
20	25407673	25452628	44956	+	ENSG00000101003	GINS1	protein_coding	chromosome	GINS complex subunit 1 [Source:HGNC Symbol;Acc:HGNC:28980]	ENSG00000101003.10	GINS1	9837	2.83	3.41	225	2.85e-31	2.91e-29	30.5
1	209827972	209857565	29594	+	ENSG00000117597	UTP25	protein_coding	chromosome	UTP25 small subunit processor component [Source:HGNC Symbol;Acc:HGNC:28440]	ENSG00000117597.18	UTP25	27042	1.44	3.79	225	2.92e-31	2.97e-29	30.5
1	25884181	25906991	22811	-	ENSG00000117632	STMN1	protein_coding	chromosome	stathmin 1 [Source:HGNC Symbol;Acc:HGNC:6510]	ENSG00000117632.23	STMN1	3925	1.97	5.75	225	3.13e-31	3.16e-29	30.5
16	3651639	3717553	65915	-	ENSG00000126602	TRAP1	protein_coding	chromosome	TNF receptor associated protein 1 [Source:HGNC Symbol;Acc:HGNC:16264]	ENSG00000126602.11	TRAP1	10131	1.94	6.76	224	3.91e-31	3.93e-29	30.4
3	186789880	186807058	17179	-	ENSG00000163918	RFC4	protein_coding	chromosome	replication factor C subunit 4 [Source:HGNC Symbol;Acc:HGNC:9972]	ENSG00000163918.10	RFC4	5984	1.84	3.41	224	3.94e-31	3.94e-29	30.4
11	119093854	119095467	1614	-	ENSG00000188486	H2AFX	protein_coding	chromosome	H2A histone family member X [Source:HGNC Symbol;Acc:HGNC:4739]	ENSG00000188486.3	H2AFX	3014	1.68	6.41	223	4.14e-31	4.09e-29	30.4
8	142727223	142736927	9705	+	ENSG00000130193	THEM6	protein_coding	chromosome	thioesterase superfamily member 6 [Source:HGNC Symbol;Acc:HGNC:29656]	ENSG00000130193.8	THEM6	51337	1.92	5.65	223	4.15e-31	4.09e-29	30.4
19	48748011	48755390	7380	-	ENSG00000174951	FUT1	protein_coding	chromosome	fucosyltransferase 1 (H blood group) [Source:HGNC Symbol;Acc:HGNC:4012]	ENSG00000174951.11	FUT1	2523	2.49	2.07	223	4.21e-31	4.13e-29	30.4
6	34757505	34773857	16353	+	ENSG00000124562	SNRPC	protein_coding	chromosome	small nuclear ribonucleoprotein polypeptide C [Source:HGNC Symbol;Acc:HGNC:11157]	ENSG00000124562.10	SNRPC	6631	1.18	5.18	223	4.45e-31	4.34e-29	30.4
12	110372900	110403730	30831	-	ENSG00000196510	ANAPC7	protein_coding	chromosome	anaphase promoting complex subunit 7 [Source:HGNC Symbol;Acc:HGNC:17380]	ENSG00000196510.12	ANAPC7	51434	1.08	5.14	222	5.13e-31	4.95e-29	30.3
9	128455186	128501292	46107	+	ENSG00000136811	ODF2	protein_coding	chromosome	outer dense fiber of sperm tails 2 [Source:HGNC Symbol;Acc:HGNC:8114]	ENSG00000136811.16	ODF2	4957	1.31	5.12	222	5.14e-31	4.95e-29	30.3
9	128729786	128772414	42629	-	ENSG00000160445	ZER1	protein_coding	chromosome	zyg-11 related cell cycle regulator [Source:HGNC Symbol;Acc:HGNC:30960]	ENSG00000160445.11	ZER1	10444	-1.55	6.56	222	5.93e-31	5.68e-29	30.2
10	60778331	60794852	16522	+	ENSG00000170312	CDK1	protein_coding	chromosome	cyclin dependent kinase 1 [Source:HGNC Symbol;Acc:HGNC:1722]	ENSG00000170312.16	CDK1	983	2.72	4.1	221	5.98e-31	5.7e-29	30.2
4	4267701	4290154	22454	-	ENSG00000145220	LYAR	protein_coding	chromosome	Ly1 antibody reactive [Source:HGNC Symbol;Acc:HGNC:26021]	ENSG00000145220.14	LYAR	55646	2.05	3.86	221	6.59e-31	6.24e-29	30.2
11	61792911	61797238	4328	+	ENSG00000168496	FEN1	protein_coding	chromosome	flap structure-specific endonuclease 1 [Source:HGNC Symbol;Acc:HGNC:3650]	ENSG00000168496.4	FEN1	2237	1.97	4.58	221	6.98e-31	6.57e-29	30.2
11	34105617	34147670	42054	+	ENSG00000135372	NAT10	protein_coding	chromosome	N-acetyltransferase 10 [Source:HGNC Symbol;Acc:HGNC:29830]	ENSG00000135372.9	NAT10	55226	1.8	5.5	221	7.1e-31	6.64e-29	30.1
17	43527844	43579620	51777	-	ENSG00000175832	ETV4	protein_coding	chromosome	ETS variant 4 [Source:HGNC Symbol;Acc:HGNC:3493]	ENSG00000175832.13	ETV4	2118	4.29	5.4	220	8e-31	7.44e-29	30.1
1	234391313	234479179	87867	-	ENSG00000059588	TARBP1	protein_coding	chromosome	TAR (HIV-1) RNA binding protein 1 [Source:HGNC Symbol;Acc:HGNC:11568]	ENSG00000059588.10	TARBP1	6894	1.47	5.68	220	8.16e-31	7.56e-29	30.1
19	4903080	4962154	59075	+	ENSG00000276043	UHRF1	protein_coding	chromosome	ubiquitin like with PHD and ring finger domains 1 [Source:HGNC Symbol;Acc:HGNC:12556]	ENSG00000276043.5	UHRF1	29128	2.46	4.14	220	8.36e-31	7.7e-29	30.1
2	74425835	74442422	16588	-	ENSG00000114993	RTKN	protein_coding	chromosome	rhotekin [Source:HGNC Symbol;Acc:HGNC:10466]	ENSG00000114993.17	RTKN	6242	1.93	5.85	220	8.63e-31	7.9e-29	30.1
9	100302077	100352942	50866	-	ENSG00000136891	TEX10	protein_coding	chromosome	testis expressed 10 [Source:HGNC Symbol;Acc:HGNC:25988]	ENSG00000136891.14	TEX10	54881	1.3	3.86	220	8.79e-31	8e-29	30.1
7	152759749	152855378	95630	+	ENSG00000133627	ACTR3B	protein_coding	chromosome	actin related protein 3B [Source:HGNC Symbol;Acc:HGNC:17256]	ENSG00000133627.18	ACTR3B	57180	1.2	3.33	219	8.84e-31	8e-29	30.1
6	42879616	42889925	10310	+	ENSG00000146223	RPL7L1	protein_coding	chromosome	ribosomal protein L7 like 1 [Source:HGNC Symbol;Acc:HGNC:21370]	ENSG00000146223.15	RPL7L1	285855	1.05	6.52	219	9.02e-31	8.12e-29	30
13	21153595	21176552	22958	-	ENSG00000165480	SKA3	protein_coding	chromosome	spindle and kinetochore associated complex subunit 3 [Source:HGNC Symbol;Acc:HGNC:20262]	ENSG00000165480.16	SKA3	221150	3.21	3.11	219	9.57e-31	8.56e-29	30
9	33461353	33473930	12578	-	ENSG00000165271	NOL6	protein_coding	chromosome	nucleolar protein 6 [Source:HGNC Symbol;Acc:HGNC:19910]	ENSG00000165271.17	NOL6	65083	1.62	5.38	219	9.73e-31	8.67e-29	30
1	23019443	23083689	64247	+	ENSG00000004487	KDM1A	protein_coding	chromosome	lysine demethylase 1A [Source:HGNC Symbol;Acc:HGNC:29079]	ENSG00000004487.16	KDM1A	23028	1.3	5.78	219	1.05e-30	9.34e-29	30
1	200551497	200620751	69255	-	ENSG00000118193	KIF14	protein_coding	chromosome	kinesin family member 14 [Source:HGNC Symbol;Acc:HGNC:19181]	ENSG00000118193.12	KIF14	9928	2.5	2.44	218	1.14e-30	1e-28	29.9
1	156072013	156082465	10453	-	ENSG00000254726	MEX3A	protein_coding	chromosome	mex-3 RNA binding family member A [Source:HGNC Symbol;Acc:HGNC:33482]	ENSG00000254726.3	MEX3A	92312	3.27	2.91	218	1.14e-30	1e-28	29.9
X	24054946	24078810	23865	+	ENSG00000130741	EIF2S3	protein_coding	chromosome	eukaryotic translation initiation factor 2 subunit gamma [Source:HGNC Symbol;Acc:HGNC:3267]	ENSG00000130741.11	EIF2S3	1968	1.26	6.85	218	1.16e-30	1.01e-28	29.9
19	12688053	12696631	8579	-	ENSG00000132004	FBXW9	protein_coding	chromosome	F-box and WD repeat domain containing 9 [Source:HGNC Symbol;Acc:HGNC:28136]	ENSG00000132004.13	FBXW9	84261	1.41	3.32	218	1.17e-30	1.02e-28	29.9
5	147870682	147882191	11510	+	ENSG00000164265	SCGB3A2	protein_coding	chromosome	secretoglobin family 3A member 2 [Source:HGNC Symbol;Acc:HGNC:18391]	ENSG00000164265.9	SCGB3A2	117156	3.27	2.39	218	1.22e-30	1.05e-28	29.9
4	109815510	109824740	9231	+	ENSG00000109534	GAR1	protein_coding	chromosome	GAR1 ribonucleoprotein [Source:HGNC Symbol;Acc:HGNC:14264]	ENSG00000109534.17	GAR1	54433	1.36	3.64	218	1.26e-30	1.08e-28	29.9
1	92029985	92063538	33554	+	ENSG00000172031	EPHX4	protein_coding	chromosome	epoxide hydrolase 4 [Source:HGNC Symbol;Acc:HGNC:23758]	ENSG00000172031.7	EPHX4	253152	4.17	0.857	218	1.28e-30	1.09e-28	29.9
X	70290104	70420886	130783	+	ENSG00000090889	KIF4A	protein_coding	chromosome	kinesin family member 4A [Source:HGNC Symbol;Acc:HGNC:13339]	ENSG00000090889.12	KIF4A	24137	2.91	3.82	218	1.3e-30	1.1e-28	29.9
17	81932384	81942412	10029	-	ENSG00000183010	PYCR1	protein_coding	chromosome	pyrroline-5-carboxylate reductase 1 [Source:HGNC Symbol;Acc:HGNC:9721]	ENSG00000183010.17	PYCR1	5831	2.47	6.12	218	1.3e-30	1.1e-28	29.9
7	103312289	103344830	32542	-	ENSG00000105821	DNAJC2	protein_coding	chromosome	DnaJ heat shock protein family (Hsp40) member C2 [Source:HGNC Symbol;Acc:HGNC:13192]	ENSG00000105821.15	DNAJC2	27000	1.32	4.72	218	1.31e-30	1.1e-28	29.9
3	152243828	152465780	221953	+	ENSG00000152601	MBNL1	protein_coding	chromosome	muscleblind like splicing regulator 1 [Source:HGNC Symbol;Acc:HGNC:6923]	ENSG00000152601.17	MBNL1	4154	-1.18	6.59	217	1.33e-30	1.11e-28	29.9
11	102520508	102530750	10243	-	ENSG00000137673	MMP7	protein_coding	chromosome	matrix metallopeptidase 7 [Source:HGNC Symbol;Acc:HGNC:7174]	ENSG00000137673.9	MMP7	4316	5.91	5.01	217	1.34e-30	1.11e-28	29.9
11	27330827	27363234	32408	-	ENSG00000109881	CCDC34	protein_coding	chromosome	coiled-coil domain containing 34 [Source:HGNC Symbol;Acc:HGNC:25079]	ENSG00000109881.17	CCDC34	91057	1.7	3.25	217	1.37e-30	1.13e-28	29.9
16	67438014	67481181	43168	-	ENSG00000159720	ATP6V0D1	protein_coding	chromosome	ATPase H+ transporting V0 subunit d1 [Source:HGNC Symbol;Acc:HGNC:13724]	ENSG00000159720.12	ATP6V0D1	9114	-1.46	7.21	217	1.38e-30	1.14e-28	29.9
1	109616104	109632053	15950	+	ENSG00000116337	AMPD2	protein_coding	chromosome	adenosine monophosphate deaminase 2 [Source:HGNC Symbol;Acc:HGNC:469]	ENSG00000116337.18	AMPD2	271	1.5	5.71	217	1.44e-30	1.18e-28	29.8
7	2234222	2242205	7984	-	ENSG00000122687	MRM2	protein_coding	chromosome	mitochondrial rRNA methyltransferase 2 [Source:HGNC Symbol;Acc:HGNC:16352]	ENSG00000122687.18	MRM2	29960	1.2	4.04	217	1.49e-30	1.21e-28	29.8
12	131929200	131945896	16697	+	ENSG00000177192	PUS1	protein_coding	chromosome	pseudouridine synthase 1 [Source:HGNC Symbol;Acc:HGNC:15508]	ENSG00000177192.14	PUS1	80324	1.85	5.28	217	1.49e-30	1.21e-28	29.8
17	59155499	59204705	49207	+	ENSG00000068489	PRR11	protein_coding	chromosome	proline rich 11 [Source:HGNC Symbol;Acc:HGNC:25619]	ENSG00000068489.12	PRR11	55771	1.98	3.03	217	1.55e-30	1.25e-28	29.8
8	47773108	47960183	187076	-	ENSG00000253729	PRKDC	protein_coding	chromosome	protein kinase, DNA-activated, catalytic subunit [Source:HGNC Symbol;Acc:HGNC:9413]	ENSG00000253729.7	PRKDC	5591	2.1	6.69	217	1.59e-30	1.28e-28	29.8
5	36151989	36184319	32331	+	ENSG00000145604	SKP2	protein_coding	chromosome	S-phase kinase associated protein 2 [Source:HGNC Symbol;Acc:HGNC:10901]	ENSG00000145604.16	SKP2	6502	1.47	3.72	216	1.63e-30	1.3e-28	29.8
1	111439890	111449256	9367	-	ENSG00000116455	WDR77	protein_coding	chromosome	WD repeat domain 77 [Source:HGNC Symbol;Acc:HGNC:29652]	ENSG00000116455.14	WDR77	79084	1.58	5.19	216	1.67e-30	1.33e-28	29.8
15	69414246	69448427	34182	+	ENSG00000137807	KIF23	protein_coding	chromosome	kinesin family member 23 [Source:HGNC Symbol;Acc:HGNC:6392]	ENSG00000137807.15	KIF23	9493	2.22	3.71	216	1.72e-30	1.36e-28	29.8
4	2937933	2963406	25474	-	ENSG00000087269	NOP14	protein_coding	chromosome	NOP14 nucleolar protein [Source:HGNC Symbol;Acc:HGNC:16821]	ENSG00000087269.16	NOP14	8602	1.45	5.3	216	1.74e-30	1.37e-28	29.8
6	34236873	34246231	9359	+	ENSG00000137309	HMGA1	protein_coding	chromosome	high mobility group AT-hook 1 [Source:HGNC Symbol;Acc:HGNC:5010]	ENSG00000137309.19	HMGA1	3159	1.83	8.23	216	1.8e-30	1.41e-28	29.7
12	49323236	49331731	8496	+	ENSG00000135451	TROAP	protein_coding	chromosome	trophinin associated protein [Source:HGNC Symbol;Acc:HGNC:12327]	ENSG00000135451.13	TROAP	10024	2.8	4.66	216	1.92e-30	1.5e-28	29.7
3	52681156	52694497	13342	+	ENSG00000163938	GNL3	protein_coding	chromosome	G protein nucleolar 3 [Source:HGNC Symbol;Acc:HGNC:29931]	ENSG00000163938.17	GNL3	26354	1.78	5.85	215	2.06e-30	1.6e-28	29.7
16	2460086	2464963	4878	+	ENSG00000162062	TEDC2	protein_coding	chromosome	tubulin epsilon and delta complex 2 [Source:HGNC Symbol;Acc:HGNC:25849]	ENSG00000162062.15	TEDC2	80178	2.72	3	215	2.09e-30	1.61e-28	29.7
X	101098218	101163681	65464	+	ENSG00000102384	CENPI	protein_coding	chromosome	centromere protein I [Source:HGNC Symbol;Acc:HGNC:3968]	ENSG00000102384.13	CENPI	2491	2.65	1.66	215	2.11e-30	1.62e-28	29.7
1	17406760	17439677	32918	-	ENSG00000179051	RCC2	protein_coding	chromosome	regulator of chromosome condensation 2 [Source:HGNC Symbol;Acc:HGNC:30297]	ENSG00000179051.14	RCC2	55920	1.21	6.51	215	2.36e-30	1.81e-28	29.6
7	73683025	73705161	22137	+	ENSG00000071462	BUD23	protein_coding	chromosome	BUD23 rRNA methyltransferase and ribosome maturation factor [Source:HGNC Symbol;Acc:HGNC:16405]	ENSG00000071462.11	BUD23	114049	1.33	6.05	214	2.43e-30	1.84e-28	29.6
11	57325986	57335892	9907	-	ENSG00000149136	SSRP1	protein_coding	chromosome	structure specific recognition protein 1 [Source:HGNC Symbol;Acc:HGNC:11327]	ENSG00000149136.9	SSRP1	6749	1.27	6.78	214	2.43e-30	1.84e-28	29.6
7	158631169	158704804	73636	-	ENSG00000146918	NCAPG2	protein_coding	chromosome	non-SMC condensin II complex subunit G2 [Source:HGNC Symbol;Acc:HGNC:21904]	ENSG00000146918.20	NCAPG2	54892	2.11	4.07	214	2.63e-30	1.98e-28	29.6
20	44910062	44959035	48974	+	ENSG00000101104	PABPC1L	protein_coding	chromosome	poly(A) binding protein cytoplasmic 1 like [Source:HGNC Symbol;Acc:HGNC:15797]	ENSG00000101104.12	PABPC1L	80336	2.05	5.56	214	2.79e-30	2.1e-28	29.6
1	1512162	1534685	22524	+	ENSG00000197785	ATAD3A	protein_coding	chromosome	ATPase family AAA domain containing 3A [Source:HGNC Symbol;Acc:HGNC:25567]	ENSG00000197785.14	ATAD3A	55210	1.57	5.72	213	3.02e-30	2.26e-28	29.5
X	16839283	16870414	31132	-	ENSG00000102054	RBBP7	protein_coding	chromosome	RB binding protein 7, chromatin remodeling factor [Source:HGNC Symbol;Acc:HGNC:9890]	ENSG00000102054.17	RBBP7	5931	1.09	6.33	213	3.07e-30	2.28e-28	29.5
12	69585426	69601570	16145	+	ENSG00000166226	CCT2	protein_coding	chromosome	chaperonin containing TCP1 subunit 2 [Source:HGNC Symbol;Acc:HGNC:1615]	ENSG00000166226.13	CCT2	10576	1.57	6.25	213	3.17e-30	2.35e-28	29.5
3	44975241	45036066	60826	+	ENSG00000075914	EXOSC7	protein_coding	chromosome	exosome component 7 [Source:HGNC Symbol;Acc:HGNC:28112]	ENSG00000075914.13	EXOSC7	23016	1.22	4.41	213	3.2e-30	2.36e-28	29.5
1	173477330	173488815	11486	+	ENSG00000117592	PRDX6	protein_coding	chromosome	peroxiredoxin 6 [Source:HGNC Symbol;Acc:HGNC:16753]	ENSG00000117592.9	PRDX6	9588	-1.89	8.14	213	3.29e-30	2.42e-28	29.5
9	92210207	92293756	83550	-	ENSG00000196305	IARS	protein_coding	chromosome	isoleucyl-tRNA synthetase [Source:HGNC Symbol;Acc:HGNC:5330]	ENSG00000196305.17	IARS	3376	1.88	6.01	213	3.31e-30	2.42e-28	29.5
11	20387558	20509338	121781	+	ENSG00000185238	PRMT3	protein_coding	chromosome	protein arginine methyltransferase 3 [Source:HGNC Symbol;Acc:HGNC:30163]	ENSG00000185238.13	PRMT3	10196	1.74	3.36	213	3.58e-30	2.61e-28	29.4
CHR_HSCHR8_3_CTG7	143603913	143609773	5861	-	ENSG00000276657	PYCR3	protein_coding	chromosome	pyrroline-5-carboxylate reductase 3 [Source:HGNC Symbol;Acc:HGNC:25846]	ENSG00000276657.2	PYCR3	65263	2.25	4.16	212	3.63e-30	2.63e-28	29.4
7	41667168	41705834	38667	-	ENSG00000122641	INHBA	protein_coding	chromosome	inhibin subunit beta A [Source:HGNC Symbol;Acc:HGNC:6066]	ENSG00000122641.11	INHBA	3624	4.12	3.53	212	3.67e-30	2.65e-28	29.4
4	37590800	37686376	95577	-	ENSG00000181826	RELL1	protein_coding	chromosome	RELT like 1 [Source:HGNC Symbol;Acc:HGNC:27379]	ENSG00000181826.10	RELL1	768211	-1.96	4.56	212	3.72e-30	2.66e-28	29.4
19	6436079	6465203	29125	-	ENSG00000125648	SLC25A23	protein_coding	chromosome	solute carrier family 25 member 23 [Source:HGNC Symbol;Acc:HGNC:19375]	ENSG00000125648.15	SLC25A23	79085	-1.84	7.3	212	3.73e-30	2.66e-28	29.4
5	170763350	170814047	50698	+	ENSG00000094755	GABRP	protein_coding	chromosome	gamma-aminobutyric acid type A receptor pi subunit [Source:HGNC Symbol;Acc:HGNC:4089]	ENSG00000094755.17	GABRP	2568	3.12	4	212	3.74e-30	2.66e-28	29.4
1	21217247	21345572	128326	-	ENSG00000117298	ECE1	protein_coding	chromosome	endothelin converting enzyme 1 [Source:HGNC Symbol;Acc:HGNC:3146]	ENSG00000117298.16	ECE1	1889	-1.4	7.46	212	3.75e-30	2.66e-28	29.4
2	238060924	238099413	38490	+	ENSG00000132330	SCLY	protein_coding	chromosome	selenocysteine lyase [Source:HGNC Symbol;Acc:HGNC:18161]	ENSG00000132330.18	SCLY	51540	1.4	4.07	212	3.78e-30	2.67e-28	29.4
20	49219295	49244077	24783	+	ENSG00000124228	DDX27	protein_coding	chromosome	DEAD-box helicase 27 [Source:HGNC Symbol;Acc:HGNC:15837]	ENSG00000124228.14	DDX27	55661	1.29	6.11	212	3.81e-30	2.68e-28	29.4
12	118013588	118033130	19543	+	ENSG00000111445	RFC5	protein_coding	chromosome	replication factor C subunit 5 [Source:HGNC Symbol;Acc:HGNC:9973]	ENSG00000111445.14	RFC5	5985	1.34	3.61	212	3.88e-30	2.72e-28	29.4
19	41386374	41397359	10986	-	ENSG00000077348	EXOSC5	protein_coding	chromosome	exosome component 5 [Source:HGNC Symbol;Acc:HGNC:24662]	ENSG00000077348.9	EXOSC5	56915	2.05	4.2	212	3.93e-30	2.74e-28	29.4
19	50418938	50431314	12377	+	ENSG00000269404	SPIB	protein_coding	chromosome	Spi-B transcription factor [Source:HGNC Symbol;Acc:HGNC:11242]	ENSG00000269404.7	SPIB	6689	-4.01	5.9	212	4.39e-30	3.05e-28	29.4
11	134150119	134225454	75336	-	ENSG00000151503	NCAPD3	protein_coding	chromosome	non-SMC condensin II complex subunit D3 [Source:HGNC Symbol;Acc:HGNC:28952]	ENSG00000151503.12	NCAPD3	23310	1.66	4.76	211	4.52e-30	3.12e-28	29.3
3	51933429	51941904	8476	-	ENSG00000114767	RRP9	protein_coding	chromosome	ribosomal RNA processing 9, U3 small nucleolar RNA binding protein [Source:HGNC Symbol;Acc:HGNC:16829]	ENSG00000114767.7	RRP9	9136	1.8	4.67	211	4.54e-30	3.13e-28	29.3
16	89575758	89597246	21489	+	ENSG00000178773	CPNE7	protein_coding	chromosome	copine 7 [Source:HGNC Symbol;Acc:HGNC:2320]	ENSG00000178773.15	CPNE7	27132	5.08	5.61	211	4.94e-30	3.38e-28	29.3
2	85341955	85354531	12577	-	ENSG00000042445	RETSAT	protein_coding	chromosome	retinol saturase [Source:HGNC Symbol;Acc:HGNC:25991]	ENSG00000042445.14	RETSAT	54884	-1.96	8.17	210	5.93e-30	4.04e-28	29.2
1	228735479	228746664	11186	+	ENSG00000116574	RHOU	protein_coding	chromosome	ras homolog family member U [Source:HGNC Symbol;Acc:HGNC:17794]	ENSG00000116574.6	RHOU	58480	-1.96	5.89	210	6.05e-30	4.12e-28	29.2
17	74935802	74949992	14191	+	ENSG00000182938	OTOP3	protein_coding	chromosome	otopetrin 3 [Source:HGNC Symbol;Acc:HGNC:19658]	ENSG00000182938.6	OTOP3	347741	-5.68	1.83	210	6.2e-30	4.2e-28	29.2
5	69189574	69210357	20784	+	ENSG00000153044	CENPH	protein_coding	chromosome	centromere protein H [Source:HGNC Symbol;Acc:HGNC:17268]	ENSG00000153044.10	CENPH	64946	2.21	2.52	210	6.38e-30	4.3e-28	29.2
1	20633458	20651511	18054	+	ENSG00000158828	PINK1	protein_coding	chromosome	PTEN induced kinase 1 [Source:HGNC Symbol;Acc:HGNC:14581]	ENSG00000158828.8	PINK1	65018	-1.63	7.12	210	6.41e-30	4.31e-28	29.2
20	2652593	2658393	5801	+	ENSG00000101361	NOP56	protein_coding	chromosome	NOP56 ribonucleoprotein [Source:HGNC Symbol;Acc:HGNC:15911]	ENSG00000101361.17	NOP56	10528	2.03	6.82	210	6.61e-30	4.42e-28	29.2
4	56393362	56435615	42254	-	ENSG00000128059	PPAT	protein_coding	chromosome	phosphoribosyl pyrophosphate amidotransferase [Source:HGNC Symbol;Acc:HGNC:9238]	ENSG00000128059.8	PPAT	5471	2.23	3.07	209	6.81e-30	4.54e-28	29.2
9	36572862	36677683	104822	+	ENSG00000165304	MELK	protein_coding	chromosome	maternal embryonic leucine zipper kinase [Source:HGNC Symbol;Acc:HGNC:16870]	ENSG00000165304.8	MELK	9833	2.47	3.51	209	7.08e-30	4.7e-28	29.2
1	236549005	236604516	55512	-	ENSG00000119285	HEATR1	protein_coding	chromosome	HEAT repeat containing 1 [Source:HGNC Symbol;Acc:HGNC:25517]	ENSG00000119285.11	HEATR1	55127	1.77	4.73	209	7.2e-30	4.76e-28	29.1
21	42843094	42879568	36475	-	ENSG00000160193	WDR4	protein_coding	chromosome	WD repeat domain 4 [Source:HGNC Symbol;Acc:HGNC:12756]	ENSG00000160193.12	WDR4	10785	1.98	3.72	209	7.23e-30	4.76e-28	29.1
9	21802636	21937651	135016	+	ENSG00000099810	MTAP	protein_coding	chromosome	methylthioadenosine phosphorylase [Source:HGNC Symbol;Acc:HGNC:7413]	ENSG00000099810.21	MTAP	4507	2.15	4.41	209	7.27e-30	4.76e-28	29.1
11	64185272	64204543	19272	+	ENSG00000168439	STIP1	protein_coding	chromosome	stress induced phosphoprotein 1 [Source:HGNC Symbol;Acc:HGNC:11387]	ENSG00000168439.16	STIP1	10963	1.33	6.54	209	7.74e-30	5.05e-28	29.1
18	3411608	3459978	48371	+	ENSG00000177426	TGIF1	protein_coding	chromosome	TGFB induced factor homeobox 1 [Source:HGNC Symbol;Acc:HGNC:11776]	ENSG00000177426.20	TGIF1	7050	1.59	5.38	209	8.04e-30	5.23e-28	29.1
9	19053141	19102904	49764	-	ENSG00000147874	HAUS6	protein_coding	chromosome	HAUS augmin like complex subunit 6 [Source:HGNC Symbol;Acc:HGNC:25948]	ENSG00000147874.11	HAUS6	54801	1.41	3.76	208	8.61e-30	5.57e-28	29.1
12	102120185	102197520	77336	+	ENSG00000185480	PARPBP	protein_coding	chromosome	PARP1 binding protein [Source:HGNC Symbol;Acc:HGNC:26074]	ENSG00000185480.11	PARPBP	55010	2.52	2.21	208	9.23e-30	5.95e-28	29
11	66685248	66729226	43979	-	ENSG00000173898	SPTBN2	protein_coding	chromosome	spectrin beta, non-erythrocytic 2 [Source:HGNC Symbol;Acc:HGNC:11276]	ENSG00000173898.13	SPTBN2	6712	3.31	4.43	207	1.02e-29	6.58e-28	29
X	101390824	101396154	5331	+	ENSG00000241343	RPL36A	protein_coding	chromosome	ribosomal protein L36a [Source:HGNC Symbol;Acc:HGNC:10359]	ENSG00000241343.9	RPL36A	6173	1.62	7.63	207	1.03e-29	6.59e-28	29
3	48157146	48188417	31272	-	ENSG00000164045	CDC25A	protein_coding	chromosome	cell division cycle 25A [Source:HGNC Symbol;Acc:HGNC:1725]	ENSG00000164045.12	CDC25A	993	2.59	3.34	207	1.06e-29	6.75e-28	29
22	20394115	20408461	14347	+	ENSG00000185252	ZNF74	protein_coding	chromosome	zinc finger protein 74 [Source:HGNC Symbol;Acc:HGNC:13144]	ENSG00000185252.19	ZNF74	7625	1.76	3.54	207	1.06e-29	6.75e-28	29
12	120725774	120740008	14235	+	ENSG00000122971	ACADS	protein_coding	chromosome	acyl-CoA dehydrogenase short chain [Source:HGNC Symbol;Acc:HGNC:90]	ENSG00000122971.9	ACADS	35	-1.75	7.12	207	1.1e-29	6.94e-28	29
2	197500140	197503449	3310	+	ENSG00000115541	HSPE1	protein_coding	chromosome	heat shock protein family E (Hsp10) member 1 [Source:HGNC Symbol;Acc:HGNC:5269]	ENSG00000115541.11	HSPE1	3336	1.78	6.13	207	1.2e-29	7.57e-28	28.9
11	60890547	60906585	16039	-	ENSG00000110107	PRPF19	protein_coding	chromosome	pre-mRNA processing factor 19 [Source:HGNC Symbol;Acc:HGNC:17896]	ENSG00000110107.9	PRPF19	27339	1.52	6.23	207	1.21e-29	7.58e-28	28.9
3	127629185	127672802	43618	+	ENSG00000114631	PODXL2	protein_coding	chromosome	podocalyxin like 2 [Source:HGNC Symbol;Acc:HGNC:17936]	ENSG00000114631.11	PODXL2	50512	2.17	5.13	206	1.26e-29	7.86e-28	28.9
6	41787662	41789898	2237	+	ENSG00000214736	TOMM6	protein_coding	chromosome	translocase of outer mitochondrial membrane 6 [Source:HGNC Symbol;Acc:HGNC:34528]	ENSG00000214736.7	TOMM6	100188893	1.24	5.73	206	1.28e-29	7.95e-28	28.9
X	21940709	21994837	54129	+	ENSG00000102172	SMS	protein_coding	chromosome	spermine synthase [Source:HGNC Symbol;Acc:HGNC:11123]	ENSG00000102172.16	SMS	6611	1.18	5.74	206	1.31e-29	8.1e-28	28.9
6	149818757	149864359	45603	-	ENSG00000120256	LRP11	protein_coding	chromosome	LDL receptor related protein 11 [Source:HGNC Symbol;Acc:HGNC:16936]	ENSG00000120256.11	LRP11	84918	1.7	5.18	206	1.31e-29	8.11e-28	28.9
8	67062426	67196263	133838	+	ENSG00000104218	CSPP1	protein_coding	chromosome	centrosome and spindle pole associated protein 1 [Source:HGNC Symbol;Acc:HGNC:26193]	ENSG00000104218.14	CSPP1	79848	1.56	3.67	206	1.32e-29	8.11e-28	28.9
7	100802565	100827523	24959	-	ENSG00000196411	EPHB4	protein_coding	chromosome	EPH receptor B4 [Source:HGNC Symbol;Acc:HGNC:3395]	ENSG00000196411.10	EPHB4	2050	2.28	6.45	206	1.32e-29	8.11e-28	28.9
20	36996349	37095997	99649	-	ENSG00000080839	RBL1	protein_coding	chromosome	RB transcriptional corepressor like 1 [Source:HGNC Symbol;Acc:HGNC:9893]	ENSG00000080839.12	RBL1	5933	1.41	3.43	206	1.33e-29	8.11e-28	28.9
20	32762385	32809356	46972	+	ENSG00000088305	DNMT3B	protein_coding	chromosome	DNA methyltransferase 3 beta [Source:HGNC Symbol;Acc:HGNC:2979]	ENSG00000088305.18	DNMT3B	1789	2.23	2.17	206	1.42e-29	8.65e-28	28.8
2	202265736	202303661	37926	+	ENSG00000055044	NOP58	protein_coding	chromosome	NOP58 ribonucleoprotein [Source:HGNC Symbol;Acc:HGNC:29926]	ENSG00000055044.11	NOP58	51602	1.86	5.51	206	1.44e-29	8.72e-28	28.8
7	55951877	55956500	4624	+	ENSG00000239789	MRPS17	protein_coding	chromosome	mitochondrial ribosomal protein S17 [Source:HGNC Symbol;Acc:HGNC:14047]	ENSG00000239789.6	MRPS17	51373	1.38	3.86	206	1.44e-29	8.72e-28	28.8
14	55148112	55191608	43497	-	ENSG00000126787	DLGAP5	protein_coding	chromosome	DLG associated protein 5 [Source:HGNC Symbol;Acc:HGNC:16864]	ENSG00000126787.13	DLGAP5	9787	2.64	2.91	206	1.45e-29	8.73e-28	28.8
8	144262045	144291438	29394	-	ENSG00000261236	BOP1	protein_coding	chromosome	BOP1 ribosomal biogenesis factor [Source:HGNC Symbol;Acc:HGNC:15519]	ENSG00000261236.8	BOP1	23246	1.74	6.54	206	1.46e-29	8.74e-28	28.8
X	153929225	153935080	5856	-	ENSG00000102030	NAA10	protein_coding	chromosome	N(alpha)-acetyltransferase 10, NatA catalytic subunit [Source:HGNC Symbol;Acc:HGNC:18704]	ENSG00000102030.16	NAA10	8260	1.19	5.72	205	1.64e-29	9.83e-28	28.8
19	12922479	12934037	11559	-	ENSG00000179115	FARSA	protein_coding	chromosome	phenylalanyl-tRNA synthetase subunit alpha [Source:HGNC Symbol;Acc:HGNC:3592]	ENSG00000179115.11	FARSA	2193	1.26	5.77	205	1.72e-29	1.03e-27	28.8
11	60924463	60937159	12697	+	ENSG00000006118	TMEM132A	protein_coding	chromosome	transmembrane protein 132A [Source:HGNC Symbol;Acc:HGNC:31092]	ENSG00000006118.14	TMEM132A	54972	3.02	4.86	205	1.78e-29	1.06e-27	28.7
12	77021248	77065569	44322	-	ENSG00000165891	E2F7	protein_coding	chromosome	E2F transcription factor 7 [Source:HGNC Symbol;Acc:HGNC:23820]	ENSG00000165891.16	E2F7	144455	3.04	1.76	205	1.83e-29	1.08e-27	28.7
14	64388031	64463457	75427	+	ENSG00000100714	MTHFD1	protein_coding	chromosome	methylenetetrahydrofolate dehydrogenase, cyclohydrolase and formyltetrahydrofolate synthetase 1 [Source:HGNC Symbol;Acc:HGNC:7432]	ENSG00000100714.17	MTHFD1	4522	1.44	5.75	205	1.86e-29	1.1e-27	28.7
17	79792132	79801683	9552	-	ENSG00000141570	CBX8	protein_coding	chromosome	chromobox 8 [Source:HGNC Symbol;Acc:HGNC:15962]	ENSG00000141570.11	CBX8	57332	2.05	3.48	205	1.86e-29	1.1e-27	28.7
2	135531455	135725270	193816	+	ENSG00000048991	R3HDM1	protein_coding	chromosome	R3H domain containing 1 [Source:HGNC Symbol;Acc:HGNC:9757]	ENSG00000048991.16	R3HDM1	23518	1.13	4.12	204	1.9e-29	1.11e-27	28.7
2	197486584	197516737	30154	-	ENSG00000144381	HSPD1	protein_coding	chromosome	heat shock protein family D (Hsp60) member 1 [Source:HGNC Symbol;Acc:HGNC:5261]	ENSG00000144381.17	HSPD1	3329	2.15	8.03	204	2.12e-29	1.23e-27	28.7
2	88691673	88750929	59257	+	ENSG00000153574	RPIA	protein_coding	chromosome	ribose 5-phosphate isomerase A [Source:HGNC Symbol;Acc:HGNC:10297]	ENSG00000153574.9	RPIA	22934	1.15	4.91	204	2.29e-29	1.33e-27	28.6
2	86020216	86106155	85940	-	ENSG00000068654	POLR1A	protein_coding	chromosome	RNA polymerase I subunit A [Source:HGNC Symbol;Acc:HGNC:17264]	ENSG00000068654.16	POLR1A	25885	1.74	5.22	203	2.35e-29	1.36e-27	28.6
7	152644776	152676141	31366	-	ENSG00000196584	XRCC2	protein_coding	chromosome	X-ray repair cross complementing 2 [Source:HGNC Symbol;Acc:HGNC:12829]	ENSG00000196584.3	XRCC2	7516	1.86	2.78	203	2.35e-29	1.36e-27	28.6
8	119833976	119855894	21919	-	ENSG00000136982	DSCC1	protein_coding	chromosome	DNA replication and sister chromatid cohesion 1 [Source:HGNC Symbol;Acc:HGNC:24453]	ENSG00000136982.6	DSCC1	79075	2.88	2.3	203	2.47e-29	1.42e-27	28.6
12	68686951	68745809	58859	+	ENSG00000111581	NUP107	protein_coding	chromosome	nucleoporin 107 [Source:HGNC Symbol;Acc:HGNC:29914]	ENSG00000111581.10	NUP107	57122	1.36	4.79	203	2.5e-29	1.43e-27	28.6
5	169583636	169604778	21143	+	ENSG00000040275	SPDL1	protein_coding	chromosome	spindle apparatus coiled-coil protein 1 [Source:HGNC Symbol;Acc:HGNC:26010]	ENSG00000040275.17	SPDL1	54908	1.76	2.68	203	2.57e-29	1.47e-27	28.6
12	27332854	27425289	92436	+	ENSG00000029153	ARNTL2	protein_coding	chromosome	aryl hydrocarbon receptor nuclear translocator like 2 [Source:HGNC Symbol;Acc:HGNC:18984]	ENSG00000029153.14	ARNTL2	56938	1.87	3.27	203	2.63e-29	1.5e-27	28.6
6	31739677	31762678	23002	+	ENSG00000204410	MSH5	protein_coding	chromosome	mutS homolog 5 [Source:HGNC Symbol;Acc:HGNC:7328]	ENSG00000204410.15	MSH5	4439	1.41	3.94	203	2.67e-29	1.51e-27	28.6
17	732412	742968	10557	+	ENSG00000167695	TLCD3A	protein_coding	chromosome	TLC domain containing 3A [Source:HGNC Symbol;Acc:HGNC:29646]	ENSG00000167695.15	TLCD3A	79850	2.09	3.84	203	2.74e-29	1.55e-27	28.6
11	126202096	126211692	9597	-	ENSG00000165526	RPUSD4	protein_coding	chromosome	RNA pseudouridine synthase D4 [Source:HGNC Symbol;Acc:HGNC:25898]	ENSG00000165526.9	RPUSD4	84881	1.25	4.35	203	2.8e-29	1.57e-27	28.6
11	46743048	46846308	103261	-	ENSG00000175216	CKAP5	protein_coding	chromosome	cytoskeleton associated protein 5 [Source:HGNC Symbol;Acc:HGNC:28959]	ENSG00000175216.15	CKAP5	9793	1.59	5.89	203	2.8e-29	1.57e-27	28.6
9	34634722	34637809	3088	-	ENSG00000147955	SIGMAR1	protein_coding	chromosome	sigma non-opioid intracellular receptor 1 [Source:HGNC Symbol;Acc:HGNC:8157]	ENSG00000147955.17	SIGMAR1	10280	1.3	6.06	202	2.9e-29	1.62e-27	28.5
10	101781325	101783413	2089	-	ENSG00000107833	NPM3	protein_coding	chromosome	nucleophosmin/nucleoplasmin 3 [Source:HGNC Symbol;Acc:HGNC:7931]	ENSG00000107833.10	NPM3	10360	2.12	4.05	202	2.93e-29	1.63e-27	28.5
14	89954939	90044764	89826	+	ENSG00000042088	TDP1	protein_coding	chromosome	tyrosyl-DNA phosphodiesterase 1 [Source:HGNC Symbol;Acc:HGNC:18884]	ENSG00000042088.14	TDP1	55775	1.41	3.49	202	3.02e-29	1.68e-27	28.5
9	120855651	120894896	39246	-	ENSG00000119403	PHF19	protein_coding	chromosome	PHD finger protein 19 [Source:HGNC Symbol;Acc:HGNC:24566]	ENSG00000119403.15	PHF19	26147	1.92	4.76	202	3.11e-29	1.72e-27	28.5
16	23061406	23149270	87865	-	ENSG00000103404	USP31	protein_coding	chromosome	ubiquitin specific peptidase 31 [Source:HGNC Symbol;Acc:HGNC:20060]	ENSG00000103404.14	USP31	57478	1.64	3.69	202	3.13e-29	1.73e-27	28.5
9	101387633	101398618	10986	-	ENSG00000136897	MRPL50	protein_coding	chromosome	mitochondrial ribosomal protein L50 [Source:HGNC Symbol;Acc:HGNC:16654]	ENSG00000136897.8	MRPL50	54534	1.23	3.66	202	3.17e-29	1.74e-27	28.5
1	171781660	171814023	32364	+	ENSG00000010165	EEF1AKNMT	protein_coding	chromosome	eEF1A lysine and N-terminal methyltransferase [Source:HGNC Symbol;Acc:HGNC:24248]	ENSG00000010165.20	EEF1AKNMT	51603	0.883	4.84	202	3.32e-29	1.82e-27	28.5
3	131462212	131502983	40772	-	ENSG00000114686	MRPL3	protein_coding	chromosome	mitochondrial ribosomal protein L3 [Source:HGNC Symbol;Acc:HGNC:10379]	ENSG00000114686.9	MRPL3	11222	1.34	5.52	202	3.36e-29	1.83e-27	28.5
1	944203	959309	15107	-	ENSG00000188976	NOC2L	protein_coding	chromosome	NOC2 like nucleolar associated transcriptional repressor [Source:HGNC Symbol;Acc:HGNC:24517]	ENSG00000188976.11	NOC2L	26155	1.22	6.41	202	3.4e-29	1.85e-27	28.5
2	99337371	99401326	63956	+	ENSG00000158417	EIF5B	protein_coding	chromosome	eukaryotic translation initiation factor 5B [Source:HGNC Symbol;Acc:HGNC:30793]	ENSG00000158417.11	EIF5B	9669	1.07	5.99	202	3.44e-29	1.86e-27	28.5
19	35612735	35625355	12621	+	ENSG00000249115	HAUS5	protein_coding	chromosome	HAUS augmin like complex subunit 5 [Source:HGNC Symbol;Acc:HGNC:29130]	ENSG00000249115.9	HAUS5	23354	1.74	4.48	201	3.72e-29	2.01e-27	28.4
22	18077920	18131138	53219	+	ENSG00000215193	PEX26	protein_coding	chromosome	peroxisomal biogenesis factor 26 [Source:HGNC Symbol;Acc:HGNC:22965]	ENSG00000215193.12	PEX26	55670	-2.26	7.66	201	3.87e-29	2.08e-27	28.4
7	30496621	30504841	8221	-	ENSG00000006625	GGCT	protein_coding	chromosome	gamma-glutamylcyclotransferase [Source:HGNC Symbol;Acc:HGNC:21705]	ENSG00000006625.18	GGCT	79017	1.82	5	201	4.2e-29	2.26e-27	28.4
3	142449007	142578733	129727	-	ENSG00000175054	ATR	protein_coding	chromosome	ATR serine/threonine kinase [Source:HGNC Symbol;Acc:HGNC:882]	ENSG00000175054.16	ATR	545	1.46	4.38	200	4.36e-29	2.34e-27	28.4
9	128683424	128696400	12977	+	ENSG00000119335	SET	protein_coding	chromosome	SET nuclear proto-oncogene [Source:HGNC Symbol;Acc:HGNC:10760]	ENSG00000119335.16	SET	6418	1.45	7.33	200	4.41e-29	2.35e-27	28.4
19	48394875	48444931	50057	+	ENSG00000105464	GRIN2D	protein_coding	chromosome	glutamate ionotropic receptor NMDA type subunit 2D [Source:HGNC Symbol;Acc:HGNC:4588]	ENSG00000105464.3	GRIN2D	2906	4.21	4.66	200	4.52e-29	2.4e-27	28.3
3	184242301	184249548	7248	-	ENSG00000214160	ALG3	protein_coding	chromosome	ALG3 alpha-1,3- mannosyltransferase [Source:HGNC Symbol;Acc:HGNC:23056]	ENSG00000214160.10	ALG3	10195	1.44	5.12	200	4.63e-29	2.45e-27	28.3
19	19119169	19138513	19345	-	ENSG00000064545	TMEM161A	protein_coding	chromosome	transmembrane protein 161A [Source:HGNC Symbol;Acc:HGNC:26020]	ENSG00000064545.15	TMEM161A	54929	1.67	4.84	200	4.71e-29	2.49e-27	28.3
11	60842113	60851081	8969	+	ENSG00000110104	CCDC86	protein_coding	chromosome	coiled-coil domain containing 86 [Source:HGNC Symbol;Acc:HGNC:28359]	ENSG00000110104.13	CCDC86	79080	1.84	4.69	200	4.94e-29	2.6e-27	28.3
20	43667019	43716495	49477	+	ENSG00000101057	MYBL2	protein_coding	chromosome	MYB proto-oncogene like 2 [Source:HGNC Symbol;Acc:HGNC:7548]	ENSG00000101057.16	MYBL2	4605	3.17	5.8	200	5.16e-29	2.71e-27	28.3
10	110207605	110287365	79761	+	ENSG00000119950	MXI1	protein_coding	chromosome	MAX interactor 1, dimerization protein [Source:HGNC Symbol;Acc:HGNC:7534]	ENSG00000119950.21	MXI1	4601	-2.17	6.73	200	5.18e-29	2.71e-27	28.3
10	73183362	73248268	64907	-	ENSG00000213551	DNAJC9	protein_coding	chromosome	DnaJ heat shock protein family (Hsp40) member C9 [Source:HGNC Symbol;Acc:HGNC:19123]	ENSG00000213551.6	DNAJC9	23234	1.2	4.55	200	5.27e-29	2.75e-27	28.3
7	127652194	128092609	440416	+	ENSG00000197157	SND1	protein_coding	chromosome	staphylococcal nuclease and tudor domain containing 1 [Source:HGNC Symbol;Acc:HGNC:30646]	ENSG00000197157.11	SND1	27044	1.35	7.14	199	5.8e-29	3.01e-27	28.2
15	89243949	89317261	73313	+	ENSG00000140525	FANCI	protein_coding	chromosome	FA complementation group I [Source:HGNC Symbol;Acc:HGNC:25568]	ENSG00000140525.17	FANCI	55215	2.02	4.63	199	5.81e-29	3.01e-27	28.2
20	3162617	3173592	10976	-	ENSG00000088899	LZTS3	protein_coding	chromosome	leucine zipper tumor suppressor family member 3 [Source:HGNC Symbol;Acc:HGNC:30139]	ENSG00000088899.15	LZTS3	9762	2.43	5.39	199	5.93e-29	3.07e-27	28.2
17	58352500	58417595	65096	-	ENSG00000108375	RNF43	protein_coding	chromosome	ring finger protein 43 [Source:HGNC Symbol;Acc:HGNC:18505]	ENSG00000108375.12	RNF43	54894	2.34	7.18	199	6.04e-29	3.11e-27	28.2
6	36854827	36874803	19977	-	ENSG00000137168	PPIL1	protein_coding	chromosome	peptidylprolyl isomerase like 1 [Source:HGNC Symbol;Acc:HGNC:9260]	ENSG00000137168.8	PPIL1	51645	1.88	3.68	198	6.66e-29	3.42e-27	28.2
11	77514936	77637794	122859	-	ENSG00000074201	CLNS1A	protein_coding	chromosome	chloride nucleotide-sensitive channel 1A [Source:HGNC Symbol;Acc:HGNC:2080]	ENSG00000074201.9	CLNS1A	1207	1.32	5.16	198	6.81e-29	3.48e-27	28.2
7	139025706	139036042	10337	-	ENSG00000146858	ZC3HAV1L	protein_coding	chromosome	zinc finger CCCH-type containing, antiviral 1 like [Source:HGNC Symbol;Acc:HGNC:22423]	ENSG00000146858.8	ZC3HAV1L	92092	2.26	2.03	198	6.83e-29	3.48e-27	28.2
12	120443964	120446384	2421	-	ENSG00000170855	TRIAP1	protein_coding	chromosome	TP53 regulated inhibitor of apoptosis 1 [Source:HGNC Symbol;Acc:HGNC:26937]	ENSG00000170855.4	TRIAP1	51499	1.29	3.65	198	6.83e-29	3.48e-27	28.2
8	96239398	96261610	22213	-	ENSG00000156469	MTERF3	protein_coding	chromosome	mitochondrial transcription termination factor 3 [Source:HGNC Symbol;Acc:HGNC:24258]	ENSG00000156469.9	MTERF3	51001	1.83	3.17	198	7.36e-29	3.73e-27	28.1
12	132710819	132722734	11916	+	ENSG00000247077	PGAM5	protein_coding	chromosome	PGAM family member 5, mitochondrial serine/threonine protein phosphatase [Source:HGNC Symbol;Acc:HGNC:28763]	ENSG00000247077.7	PGAM5	192111	1.39	5.38	198	7.38e-29	3.73e-27	28.1
11	103050686	103092194	41509	-	ENSG00000137692	DCUN1D5	protein_coding	chromosome	defective in cullin neddylation 1 domain containing 5 [Source:HGNC Symbol;Acc:HGNC:28409]	ENSG00000137692.12	DCUN1D5	84259	1.9	4.04	198	7.55e-29	3.81e-27	28.1
X	48458537	48470260	11724	-	ENSG00000017483	SLC38A5	protein_coding	chromosome	solute carrier family 38 member 5 [Source:HGNC Symbol;Acc:HGNC:18070]	ENSG00000017483.15	SLC38A5	92745	2.86	5.26	198	7.79e-29	3.9e-27	28.1
2	110637528	110678063	40536	-	ENSG00000169679	BUB1	protein_coding	chromosome	BUB1 mitotic checkpoint serine/threonine kinase [Source:HGNC Symbol;Acc:HGNC:1148]	ENSG00000169679.15	BUB1	699	2.32	3.67	198	7.79e-29	3.9e-27	28.1
2	196639554	196763490	123937	+	ENSG00000144395	CCDC150	protein_coding	chromosome	coiled-coil domain containing 150 [Source:HGNC Symbol;Acc:HGNC:26834]	ENSG00000144395.18	CCDC150	284992	1.88	2.14	198	8.01e-29	4e-27	28.1
21	43659560	43696079	36520	+	ENSG00000160208	RRP1B	protein_coding	chromosome	ribosomal RNA processing 1B [Source:HGNC Symbol;Acc:HGNC:23818]	ENSG00000160208.13	RRP1B	23076	1.46	4.63	197	8.92e-29	4.44e-27	28
12	56104537	56113910	9374	+	ENSG00000170515	PA2G4	protein_coding	chromosome	proliferation-associated 2G4 [Source:HGNC Symbol;Acc:HGNC:8550]	ENSG00000170515.14	PA2G4	5036	1.41	6.88	197	1e-28	4.96e-27	28
1	58575433	58577252	1820	-	ENSG00000184292	TACSTD2	protein_coding	chromosome	tumor associated calcium signal transducer 2 [Source:HGNC Symbol;Acc:HGNC:11530]	ENSG00000184292.7	TACSTD2	4070	4.7	4.44	197	1e-28	4.96e-27	28
22	42835412	43015149	179738	-	ENSG00000100266	PACSIN2	protein_coding	chromosome	protein kinase C and casein kinase substrate in neurons 2 [Source:HGNC Symbol;Acc:HGNC:8571]	ENSG00000100266.19	PACSIN2	11252	-1.43	7.19	196	1.05e-28	5.15e-27	28
10	14878820	14904315	25496	+	ENSG00000152455	SUV39H2	protein_coding	chromosome	suppressor of variegation 3-9 homolog 2 [Source:HGNC Symbol;Acc:HGNC:17287]	ENSG00000152455.16	SUV39H2	79723	1.56	2.46	196	1.05e-28	5.15e-27	28
6	80003887	80042527	38641	+	ENSG00000112742	TTK	protein_coding	chromosome	TTK protein kinase [Source:HGNC Symbol;Acc:HGNC:12401]	ENSG00000112742.10	TTK	7272	2.85	2.81	196	1.08e-28	5.28e-27	28
5	37288137	37371106	82970	-	ENSG00000113569	NUP155	protein_coding	chromosome	nucleoporin 155 [Source:HGNC Symbol;Acc:HGNC:8063]	ENSG00000113569.16	NUP155	9631	1.57	4.07	196	1.14e-28	5.59e-27	27.9
1	108875350	108934545	59196	+	ENSG00000121957	GPSM2	protein_coding	chromosome	G protein signaling modulator 2 [Source:HGNC Symbol;Acc:HGNC:29501]	ENSG00000121957.14	GPSM2	29899	1.66	5.24	196	1.17e-28	5.69e-27	27.9
6	3063991	3115187	51197	+	ENSG00000137275	RIPK1	protein_coding	chromosome	receptor interacting serine/threonine kinase 1 [Source:HGNC Symbol;Acc:HGNC:10019]	ENSG00000137275.14	RIPK1	8737	-1.11	5.81	196	1.19e-28	5.78e-27	27.9
7	148807383	148884321	76939	-	ENSG00000106462	EZH2	protein_coding	chromosome	enhancer of zeste 2 polycomb repressive complex 2 subunit [Source:HGNC Symbol;Acc:HGNC:3527]	ENSG00000106462.10	EZH2	2146	1.54	4.55	196	1.21e-28	5.86e-27	27.9
15	32615144	32639941	24798	+	ENSG00000198826	ARHGAP11A	protein_coding	chromosome	Rho GTPase activating protein 11A [Source:HGNC Symbol;Acc:HGNC:15783]	ENSG00000198826.11	ARHGAP11A	9824	2.3	3.77	196	1.23e-28	5.93e-27	27.9
22	24270817	24417739	146923	+	ENSG00000100014	SPECC1L	protein_coding	chromosome	sperm antigen with calponin homology and coiled-coil domains 1 like [Source:HGNC Symbol;Acc:HGNC:29022]	ENSG00000100014.20	SPECC1L	23384	-1.78	6.47	196	1.24e-28	5.96e-27	27.9
13	27920000	27926313	6314	+	ENSG00000139515	PDX1	protein_coding	chromosome	pancreatic and duodenal homeobox 1 [Source:HGNC Symbol;Acc:HGNC:6107]	ENSG00000139515.6	PDX1	3651	3.69	3.14	195	1.3e-28	6.26e-27	27.9
22	28883572	29057488	173917	+	ENSG00000183579	ZNRF3	protein_coding	chromosome	zinc and ring finger 3 [Source:HGNC Symbol;Acc:HGNC:18126]	ENSG00000183579.16	ZNRF3	84133	2.7	4.05	195	1.38e-28	6.62e-27	27.9
2	73214222	73227221	13000	+	ENSG00000135632	SMYD5	protein_coding	chromosome	SMYD family member 5 [Source:HGNC Symbol;Acc:HGNC:16258]	ENSG00000135632.12	SMYD5	10322	1.69	4.34	195	1.42e-28	6.8e-27	27.8
12	57055643	57088063	32421	-	ENSG00000166881	NEMP1	protein_coding	chromosome	nuclear envelope integral membrane protein 1 [Source:HGNC Symbol;Acc:HGNC:29001]	ENSG00000166881.10	NEMP1	23306	1.5	3.89	195	1.46e-28	6.98e-27	27.8
12	4538798	4560048	21251	+	ENSG00000111247	RAD51AP1	protein_coding	chromosome	RAD51 associated protein 1 [Source:HGNC Symbol;Acc:HGNC:16956]	ENSG00000111247.14	RAD51AP1	10635	2.53	2.77	195	1.47e-28	6.99e-27	27.8
X	154010506	154019902	9397	-	ENSG00000184216	IRAK1	protein_coding	chromosome	interleukin 1 receptor associated kinase 1 [Source:HGNC Symbol;Acc:HGNC:6112]	ENSG00000184216.14	IRAK1	3654	1.31	7.2	195	1.48e-28	6.99e-27	27.8
16	649311	667833	18523	+	ENSG00000161996	WDR90	protein_coding	chromosome	WD repeat domain 90 [Source:HGNC Symbol;Acc:HGNC:26960]	ENSG00000161996.19	WDR90	197335	1.57	6.55	195	1.49e-28	7.04e-27	27.8
20	3786772	3806121	19350	+	ENSG00000101224	CDC25B	protein_coding	chromosome	cell division cycle 25B [Source:HGNC Symbol;Acc:HGNC:1726]	ENSG00000101224.17	CDC25B	994	2.33	6.61	195	1.52e-28	7.15e-27	27.8
2	207711540	207761839	50300	+	ENSG00000163249	CCNYL1	protein_coding	chromosome	cyclin Y like 1 [Source:HGNC Symbol;Acc:HGNC:26868]	ENSG00000163249.12	CCNYL1	151195	-1.82	5.37	194	1.61e-28	7.58e-27	27.8
1	43164175	43270936	106762	-	ENSG00000117395	EBNA1BP2	protein_coding	chromosome	EBNA1 binding protein 2 [Source:HGNC Symbol;Acc:HGNC:15531]	ENSG00000117395.12	EBNA1BP2	10969	1.27	5.23	194	1.65e-28	7.7e-27	27.8
5	151029945	151093577	63633	-	ENSG00000145901	TNIP1	protein_coding	chromosome	TNFAIP3 interacting protein 1 [Source:HGNC Symbol;Acc:HGNC:16903]	ENSG00000145901.15	TNIP1	10318	-1.15	7.77	194	1.65e-28	7.7e-27	27.8
7	2242222	2251146	8925	+	ENSG00000106268	NUDT1	protein_coding	chromosome	nudix hydrolase 1 [Source:HGNC Symbol;Acc:HGNC:8048]	ENSG00000106268.15	NUDT1	4521	1.55	3.82	194	1.69e-28	7.86e-27	27.8
X	46912276	47061242	148967	+	ENSG00000102221	JADE3	protein_coding	chromosome	jade family PHD finger 3 [Source:HGNC Symbol;Acc:HGNC:22982]	ENSG00000102221.14	JADE3	9767	1.72	3.26	193	1.93e-28	8.95e-27	27.7
1	152032506	152047907	15402	-	ENSG00000163191	S100A11	protein_coding	chromosome	S100 calcium binding protein A11 [Source:HGNC Symbol;Acc:HGNC:10488]	ENSG00000163191.6	S100A11	6282	1.81	7.22	193	1.93e-28	8.94e-27	27.7
8	132061486	132111159	49674	-	ENSG00000132297	HHLA1	protein_coding	chromosome	HERV-H LTR-associating 1 [Source:HGNC Symbol;Acc:HGNC:4904]	ENSG00000132297.12	HHLA1	10086	3.06	5.42	193	2.01e-28	9.29e-27	27.7
8	144511288	144517845	6558	-	ENSG00000160957	RECQL4	protein_coding	chromosome	RecQ like helicase 4 [Source:HGNC Symbol;Acc:HGNC:9949]	ENSG00000160957.13	RECQL4	9401	2.79	6	193	2.09e-28	9.62e-27	27.7
10	71747556	71773520	25965	-	ENSG00000107738	VSIR	protein_coding	chromosome	V-set immunoregulatory receptor [Source:HGNC Symbol;Acc:HGNC:30085]	ENSG00000107738.20	VSIR	64115	-1.71	6.1	193	2.1e-28	9.63e-27	27.7
2	9423651	9473101	49451	+	ENSG00000119203	CPSF3	protein_coding	chromosome	cleavage and polyadenylation specific factor 3 [Source:HGNC Symbol;Acc:HGNC:2326]	ENSG00000119203.14	CPSF3	51692	1.13	4.24	193	2.3e-28	1.05e-26	27.6
8	89757806	89791064	33259	+	ENSG00000104312	RIPK2	protein_coding	chromosome	receptor interacting serine/threonine kinase 2 [Source:HGNC Symbol;Acc:HGNC:10020]	ENSG00000104312.8	RIPK2	8767	2	3.65	193	2.31e-28	1.05e-26	27.6
X	134460165	134520513	60349	+	ENSG00000165704	HPRT1	protein_coding	chromosome	hypoxanthine phosphoribosyltransferase 1 [Source:HGNC Symbol;Acc:HGNC:5157]	ENSG00000165704.15	HPRT1	3251	1.47	3.81	193	2.32e-28	1.06e-26	27.6
20	34088309	34112243	23935	-	ENSG00000125977	EIF2S2	protein_coding	chromosome	eukaryotic translation initiation factor 2 subunit beta [Source:HGNC Symbol;Acc:HGNC:3266]	ENSG00000125977.7	EIF2S2	8894	1.26	6.38	192	2.41e-28	1.09e-26	27.6
12	109097574	109110992	13419	+	ENSG00000076248	UNG	protein_coding	chromosome	uracil DNA glycosylase [Source:HGNC Symbol;Acc:HGNC:12572]	ENSG00000076248.10	UNG	7374	1.36	4.88	192	2.57e-28	1.16e-26	27.6
17	44141906	44162476	20571	+	ENSG00000125319	C17orf53	protein_coding	chromosome	chromosome 17 open reading frame 53 [Source:HGNC Symbol;Acc:HGNC:28460]	ENSG00000125319.14	C17orf53	78995	2.54	1.97	192	2.57e-28	1.16e-26	27.6
1	182839347	182887982	48636	+	ENSG00000135829	DHX9	protein_coding	chromosome	DExH-box helicase 9 [Source:HGNC Symbol;Acc:HGNC:2750]	ENSG00000135829.17	DHX9	1660	0.873	6.51	192	2.6e-28	1.17e-26	27.6
8	41529218	41545030	15813	+	ENSG00000147536	GINS4	protein_coding	chromosome	GINS complex subunit 4 [Source:HGNC Symbol;Acc:HGNC:28226]	ENSG00000147536.12	GINS4	84296	2.17	3.08	192	2.61e-28	1.17e-26	27.6
8	97775057	97853013	77957	+	ENSG00000104341	LAPTM4B	protein_coding	chromosome	lysosomal protein transmembrane 4 beta [Source:HGNC Symbol;Acc:HGNC:13646]	ENSG00000104341.17	LAPTM4B	55353	2.17	6.07	192	2.69e-28	1.21e-26	27.6
7	73699206	73719672	20467	-	ENSG00000106089	STX1A	protein_coding	chromosome	syntaxin 1A [Source:HGNC Symbol;Acc:HGNC:11433]	ENSG00000106089.12	STX1A	6804	2.23	3.89	192	2.93e-28	1.31e-26	27.5
16	56730118	56850286	120169	+	ENSG00000102900	NUP93	protein_coding	chromosome	nucleoporin 93 [Source:HGNC Symbol;Acc:HGNC:28958]	ENSG00000102900.13	NUP93	9688	1.45	4.59	191	2.96e-28	1.32e-26	27.5
21	32268228	32279049	10822	-	ENSG00000159055	MIS18A	protein_coding	chromosome	MIS18 kinetochore protein A [Source:HGNC Symbol;Acc:HGNC:1286]	ENSG00000159055.4	MIS18A	54069	1.73	3.25	191	2.99e-28	1.33e-26	27.5
12	95858928	95903828	44901	+	ENSG00000139343	SNRPF	protein_coding	chromosome	small nuclear ribonucleoprotein polypeptide F [Source:HGNC Symbol;Acc:HGNC:11162]	ENSG00000139343.10	SNRPF	6636	1.66	4.47	191	3.02e-28	1.34e-26	27.5
15	41230839	41281887	51049	+	ENSG00000187446	CHP1	protein_coding	chromosome	calcineurin like EF-hand protein 1 [Source:HGNC Symbol;Acc:HGNC:17433]	ENSG00000187446.12	CHP1	11261	-1.56	7.53	191	3.41e-28	1.51e-26	27.5
5	150357629	150400308	42680	+	ENSG00000070814	TCOF1	protein_coding	chromosome	treacle ribosome biogenesis factor 1 [Source:HGNC Symbol;Acc:HGNC:11654]	ENSG00000070814.20	TCOF1	6949	1.48	5.76	190	3.7e-28	1.63e-26	27.4
5	178149460	178153967	4508	-	ENSG00000145912	NHP2	protein_coding	chromosome	NHP2 ribonucleoprotein [Source:HGNC Symbol;Acc:HGNC:14377]	ENSG00000145912.8	NHP2	55651	1.5	5.55	190	3.88e-28	1.7e-26	27.4
22	19479457	19520612	41156	+	ENSG00000093009	CDC45	protein_coding	chromosome	cell division cycle 45 [Source:HGNC Symbol;Acc:HGNC:1739]	ENSG00000093009.10	CDC45	8318	2.54	3.23	190	3.91e-28	1.71e-26	27.4
4	95162504	95549206	386703	-	ENSG00000182168	UNC5C	protein_coding	chromosome	unc-5 netrin receptor C [Source:HGNC Symbol;Acc:HGNC:12569]	ENSG00000182168.15	UNC5C	8633	-2.39	2.48	190	3.91e-28	1.71e-26	27.4
9	96385941	96418370	32430	-	ENSG00000165244	ZNF367	protein_coding	chromosome	zinc finger protein 367 [Source:HGNC Symbol;Acc:HGNC:18320]	ENSG00000165244.7	ZNF367	195828	2.25	2.87	190	3.96e-28	1.73e-26	27.4
11	108665069	108940927	275859	+	ENSG00000178105	DDX10	protein_coding	chromosome	DEAD-box helicase 10 [Source:HGNC Symbol;Acc:HGNC:2735]	ENSG00000178105.11	DDX10	1662	1.55	4.06	190	3.97e-28	1.73e-26	27.4
22	30576625	30607083	30459	-	ENSG00000100029	PES1	protein_coding	chromosome	pescadillo ribosomal biogenesis factor 1 [Source:HGNC Symbol;Acc:HGNC:8848]	ENSG00000100029.18	PES1	23481	1.09	6.02	190	4.22e-28	1.83e-26	27.4
20	5114953	5126626	11674	-	ENSG00000132646	PCNA	protein_coding	chromosome	proliferating cell nuclear antigen [Source:HGNC Symbol;Acc:HGNC:8729]	ENSG00000132646.11	PCNA	5111	1.71	6	190	4.23e-28	1.83e-26	27.4
20	18587893	18766644	178752	+	ENSG00000125821	DTD1	protein_coding	chromosome	D-aminoacyl-tRNA deacylase 1 [Source:HGNC Symbol;Acc:HGNC:16219]	ENSG00000125821.12	DTD1	92675	1.32	4.12	190	4.35e-28	1.88e-26	27.4
13	72708367	72727629	19263	-	ENSG00000204899	MZT1	protein_coding	chromosome	mitotic spindle organizing protein 1 [Source:HGNC Symbol;Acc:HGNC:33830]	ENSG00000204899.6	MZT1	440145	1.6	3.15	190	4.53e-28	1.95e-26	27.3
16	2968024	2980479	12456	-	ENSG00000127564	PKMYT1	protein_coding	chromosome	protein kinase, membrane associated tyrosine/threonine 1 [Source:HGNC Symbol;Acc:HGNC:29650]	ENSG00000127564.17	PKMYT1	9088	2.7	4.7	189	4.8e-28	2.06e-26	27.3
2	196133583	196176503	42921	-	ENSG00000081320	STK17B	protein_coding	chromosome	serine/threonine kinase 17b [Source:HGNC Symbol;Acc:HGNC:11396]	ENSG00000081320.11	STK17B	9262	-1.42	5.38	189	4.84e-28	2.07e-26	27.3
22	19846138	19854896	8759	-	ENSG00000215012	RTL10	protein_coding	chromosome	retrotransposon Gag like 10 [Source:HGNC Symbol;Acc:HGNC:26112]	ENSG00000215012.9	RTL10	79680	1.59	4.31	189	4.9e-28	2.09e-26	27.3
15	90954870	90963125	8256	+	ENSG00000166965	RCCD1	protein_coding	chromosome	RCC1 domain containing 1 [Source:HGNC Symbol;Acc:HGNC:30457]	ENSG00000166965.12	RCCD1	91433	1.36	4.77	189	4.93e-28	2.1e-26	27.3
19	39834458	39846379	11922	-	ENSG00000105202	FBL	protein_coding	chromosome	fibrillarin [Source:HGNC Symbol;Acc:HGNC:3599]	ENSG00000105202.9	FBL	2091	1.76	6.81	189	5.03e-28	2.14e-26	27.3
2	112211529	112255136	43608	-	ENSG00000144161	ZC3H8	protein_coding	chromosome	zinc finger CCCH-type containing 8 [Source:HGNC Symbol;Acc:HGNC:30941]	ENSG00000144161.13	ZC3H8	84524	1.29	3.59	189	5.19e-28	2.2e-26	27.3
8	66429014	66430733	1720	+	ENSG00000179041	RRS1	protein_coding	chromosome	ribosome biogenesis regulator 1 homolog [Source:HGNC Symbol;Acc:HGNC:17083]	ENSG00000179041.4	RRS1	23212	2.35	4.89	189	5.51e-28	2.33e-26	27.3
12	6844793	6852066	7274	-	ENSG00000111665	CDCA3	protein_coding	chromosome	cell division cycle associated 3 [Source:HGNC Symbol;Acc:HGNC:14624]	ENSG00000111665.11	CDCA3	83461	2.38	4.17	189	5.6e-28	2.36e-26	27.3
CHR_HSCHR8_3_CTG7	143703266	143709465	6200	+	ENSG00000274205	MAPK15	protein_coding	chromosome	mitogen-activated protein kinase 15 [Source:HGNC Symbol;Acc:HGNC:24667]	ENSG00000274205.4	MAPK15	225689	3.69	3.84	188	6.16e-28	2.59e-26	27.2
X	72204657	72239027	34371	-	ENSG00000186871	ERCC6L	protein_coding	chromosome	ERCC excision repair 6 like, spindle assembly checkpoint helicase [Source:HGNC Symbol;Acc:HGNC:20794]	ENSG00000186871.7	ERCC6L	54821	2.79	1.8	188	6.35e-28	2.66e-26	27.2
19	39480412	39493785	13374	+	ENSG00000105197	TIMM50	protein_coding	chromosome	translocase of inner mitochondrial membrane 50 [Source:HGNC Symbol;Acc:HGNC:23656]	ENSG00000105197.11	TIMM50	92609	1.73	5.75	188	6.42e-28	2.68e-26	27.2
22	33162226	33922841	760616	-	ENSG00000133424	LARGE1	protein_coding	chromosome	LARGE xylosyl- and glucuronyltransferase 1 [Source:HGNC Symbol;Acc:HGNC:6511]	ENSG00000133424.20	LARGE1	9215	-1.35	5.1	188	6.47e-28	2.7e-26	27.2
20	23747553	23751268	3716	-	ENSG00000170373	CST1	protein_coding	chromosome	cystatin SN [Source:HGNC Symbol;Acc:HGNC:2473]	ENSG00000170373.8	CST1	1469	5.1	3.38	188	6.73e-28	2.8e-26	27.2
7	16646131	16706523	60393	+	ENSG00000136261	BZW2	protein_coding	chromosome	basic leucine zipper and W2 domains 2 [Source:HGNC Symbol;Acc:HGNC:18808]	ENSG00000136261.15	BZW2	28969	1.35	5.68	188	6.77e-28	2.81e-26	27.2
17	51153536	51162428	8893	+	ENSG00000239672	NME1	protein_coding	chromosome	NME/NM23 nucleoside diphosphate kinase 1 [Source:HGNC Symbol;Acc:HGNC:7849]	ENSG00000239672.7	NME1	4830	2.26	5.65	187	7.22e-28	2.99e-26	27.1
2	222566899	222656092	89194	-	ENSG00000116120	FARSB	protein_coding	chromosome	phenylalanyl-tRNA synthetase subunit beta [Source:HGNC Symbol;Acc:HGNC:17800]	ENSG00000116120.11	FARSB	10056	1.44	4.98	187	7.51e-28	3.1e-26	27.1
7	87876216	87909553	33338	+	ENSG00000006634	DBF4	protein_coding	chromosome	DBF4 zinc finger [Source:HGNC Symbol;Acc:HGNC:17364]	ENSG00000006634.8	DBF4	10926	1.83	3.07	187	8.22e-28	3.38e-26	27.1
5	126360132	126496494	136363	+	ENSG00000155324	GRAMD2B	protein_coding	chromosome	GRAM domain containing 2B [Source:HGNC Symbol;Acc:HGNC:24911]	ENSG00000155324.10	GRAMD2B	65983	-1.85	5.1	186	8.79e-28	3.61e-26	27.1
22	28687743	28742422	54680	-	ENSG00000183765	CHEK2	protein_coding	chromosome	checkpoint kinase 2 [Source:HGNC Symbol;Acc:HGNC:16627]	ENSG00000183765.22	CHEK2	11200	1.29	3.53	186	9.1e-28	3.73e-26	27
15	59105126	59125045	19920	+	ENSG00000157456	CCNB2	protein_coding	chromosome	cyclin B2 [Source:HGNC Symbol;Acc:HGNC:1580]	ENSG00000157456.8	CCNB2	9133	2.02	3.87	186	9.15e-28	3.74e-26	27
9	37582646	37592604	9959	-	ENSG00000175768	TOMM5	protein_coding	chromosome	translocase of outer mitochondrial membrane 5 [Source:HGNC Symbol;Acc:HGNC:31369]	ENSG00000175768.13	TOMM5	401505	1.23	4.97	186	9.19e-28	3.74e-26	27
3	46574534	46582457	7924	+	ENSG00000241186	TDGF1	protein_coding	chromosome	teratocarcinoma-derived growth factor 1 [Source:HGNC Symbol;Acc:HGNC:11701]	ENSG00000241186.10	TDGF1	6997	3.35	2.91	186	9.21e-28	3.74e-26	27
3	50287732	50292918	5187	-	ENSG00000214706	IFRD2	protein_coding	chromosome	interferon related developmental regulator 2 [Source:HGNC Symbol;Acc:HGNC:5457]	ENSG00000214706.10	IFRD2	7866	1.8	5.99	186	9.44e-28	3.83e-26	27
19	3094362	3123999	29638	+	ENSG00000088256	GNA11	protein_coding	chromosome	G protein subunit alpha 11 [Source:HGNC Symbol;Acc:HGNC:4379]	ENSG00000088256.9	GNA11	2767	-1.64	8.18	186	1.01e-27	4.07e-26	27
21	39174769	39183488	8720	-	ENSG00000183527	PSMG1	protein_coding	chromosome	proteasome assembly chaperone 1 [Source:HGNC Symbol;Acc:HGNC:3043]	ENSG00000183527.12	PSMG1	8624	1.79	4.23	186	1.01e-27	4.09e-26	27
16	788046	800737	12692	+	ENSG00000127586	CHTF18	protein_coding	chromosome	chromosome transmission fidelity factor 18 [Source:HGNC Symbol;Acc:HGNC:18435]	ENSG00000127586.17	CHTF18	63922	2.22	5.88	186	1.02e-27	4.11e-26	27
14	22920525	22929408	8884	-	ENSG00000100462	PRMT5	protein_coding	chromosome	protein arginine methyltransferase 5 [Source:HGNC Symbol;Acc:HGNC:10894]	ENSG00000100462.16	PRMT5	10419	1.24	5.32	186	1.04e-27	4.19e-26	27
8	127322183	127420066	97884	+	ENSG00000212993	POU5F1B	protein_coding	chromosome	POU class 5 homeobox 1B [Source:HGNC Symbol;Acc:HGNC:9223]	ENSG00000212993.5	POU5F1B	5462	3.27	2.68	186	1.07e-27	4.27e-26	27
9	129608884	129636131	27248	+	ENSG00000148335	NTMT1	protein_coding	chromosome	N-terminal Xaa-Pro-Lys N-methyltransferase 1 [Source:HGNC Symbol;Acc:HGNC:23373]	ENSG00000148335.14	NTMT1	28989	1.22	4.67	185	1.09e-27	4.35e-26	27
1	163266576	163355764	89189	+	ENSG00000143228	NUF2	protein_coding	chromosome	NUF2 component of NDC80 kinetochore complex [Source:HGNC Symbol;Acc:HGNC:14621]	ENSG00000143228.13	NUF2	83540	2.62	2.52	185	1.11e-27	4.44e-26	27
19	32581190	32587453	6264	+	ENSG00000105185	PDCD5	protein_coding	chromosome	programmed cell death 5 [Source:HGNC Symbol;Acc:HGNC:8764]	ENSG00000105185.12	PDCD5	9141	1.4	4.85	185	1.12e-27	4.44e-26	27
20	5950652	5998977	48326	+	ENSG00000125885	MCM8	protein_coding	chromosome	minichromosome maintenance 8 homologous recombination repair factor [Source:HGNC Symbol;Acc:HGNC:16147]	ENSG00000125885.13	MCM8	84515	1.89	3.83	185	1.12e-27	4.44e-26	27
4	121816444	121823933	7490	-	ENSG00000145386	CCNA2	protein_coding	chromosome	cyclin A2 [Source:HGNC Symbol;Acc:HGNC:1578]	ENSG00000145386.10	CCNA2	890	2.43	3.93	185	1.12e-27	4.44e-26	26.9
13	30456704	30617597	160894	-	ENSG00000189403	HMGB1	protein_coding	chromosome	high mobility group box 1 [Source:HGNC Symbol;Acc:HGNC:4983]	ENSG00000189403.15	HMGB1	3146	1.28	8.05	185	1.14e-27	4.49e-26	26.9
11	119096503	119108331	11829	-	ENSG00000172269	DPAGT1	protein_coding	chromosome	dolichyl-phosphate N-acetylglucosaminephosphotransferase 1 [Source:HGNC Symbol;Acc:HGNC:2995]	ENSG00000172269.19	DPAGT1	1798	1.2	5.08	185	1.22e-27	4.81e-26	26.9
21	36385392	36419015	33624	+	ENSG00000159259	CHAF1B	protein_coding	chromosome	chromatin assembly factor 1 subunit B [Source:HGNC Symbol;Acc:HGNC:1911]	ENSG00000159259.8	CHAF1B	8208	1.78	2.94	185	1.23e-27	4.82e-26	26.9
2	63840940	63891562	50623	+	ENSG00000169764	UGP2	protein_coding	chromosome	UDP-glucose pyrophosphorylase 2 [Source:HGNC Symbol;Acc:HGNC:12527]	ENSG00000169764.15	UGP2	7360	-2.23	7.75	185	1.24e-27	4.86e-26	26.9
12	2959330	3040676	81347	+	ENSG00000197905	TEAD4	protein_coding	chromosome	TEA domain transcription factor 4 [Source:HGNC Symbol;Acc:HGNC:11717]	ENSG00000197905.9	TEAD4	7004	2.51	3.77	185	1.26e-27	4.92e-26	26.9
16	67277510	67289499	11990	+	ENSG00000196155	PLEKHG4	protein_coding	chromosome	pleckstrin homology and RhoGEF domain containing G4 [Source:HGNC Symbol;Acc:HGNC:24501]	ENSG00000196155.13	PLEKHG4	25894	2.14	5.06	185	1.29e-27	5.01e-26	26.9
8	109240919	109334118	93200	-	ENSG00000120526	NUDCD1	protein_coding	chromosome	NudC domain containing 1 [Source:HGNC Symbol;Acc:HGNC:24306]	ENSG00000120526.11	NUDCD1	84955	2.1	3.44	185	1.35e-27	5.25e-26	26.9
18	3066807	3220108	153302	-	ENSG00000101605	MYOM1	protein_coding	chromosome	myomesin 1 [Source:HGNC Symbol;Acc:HGNC:7613]	ENSG00000101605.12	MYOM1	8736	-3.34	3.04	184	1.44e-27	5.58e-26	26.8
1	35720218	35769978	49761	-	ENSG00000092853	CLSPN	protein_coding	chromosome	claspin [Source:HGNC Symbol;Acc:HGNC:19715]	ENSG00000092853.14	CLSPN	63967	1.5	3.07	184	1.46e-27	5.66e-26	26.8
10	94501434	94613905	112472	+	ENSG00000119969	HELLS	protein_coding	chromosome	helicase, lymphoid specific [Source:HGNC Symbol;Acc:HGNC:4861]	ENSG00000119969.15	HELLS	3070	1.9	3.48	184	1.49e-27	5.76e-26	26.8
11	62433542	62556235	122694	-	ENSG00000124942	AHNAK	protein_coding	chromosome	AHNAK nucleoprotein [Source:HGNC Symbol;Acc:HGNC:347]	ENSG00000124942.14	AHNAK	79026	-1.53	10	184	1.49e-27	5.76e-26	26.8
6	136922301	136925660	3360	+	ENSG00000182747	SLC35D3	protein_coding	chromosome	solute carrier family 35 member D3 [Source:HGNC Symbol;Acc:HGNC:15621]	ENSG00000182747.5	SLC35D3	340146	5.06	1.98	184	1.5e-27	5.77e-26	26.8
19	46039748	46077118	37371	-	ENSG00000204869	IGFL4	protein_coding	chromosome	IGF like family member 4 [Source:HGNC Symbol;Acc:HGNC:32931]	ENSG00000204869.8	IGFL4	444882	3.82	0.678	184	1.52e-27	5.83e-26	26.8
8	91070196	91087095	16900	+	ENSG00000155100	OTUD6B	protein_coding	chromosome	OTU domain containing 6B [Source:HGNC Symbol;Acc:HGNC:24281]	ENSG00000155100.11	OTUD6B	51633	1.63	2.96	184	1.54e-27	5.89e-26	26.8
18	49782164	49813953	31790	-	ENSG00000167315	ACAA2	protein_coding	chromosome	acetyl-CoA acyltransferase 2 [Source:HGNC Symbol;Acc:HGNC:83]	ENSG00000167315.18	ACAA2	10449	-1.76	7.47	184	1.54e-27	5.89e-26	26.8
2	135839626	135876443	36818	-	ENSG00000076003	MCM6	protein_coding	chromosome	minichromosome maintenance complex component 6 [Source:HGNC Symbol;Acc:HGNC:6949]	ENSG00000076003.5	MCM6	4175	1.95	4.65	184	1.55e-27	5.89e-26	26.8
12	54280193	54287088	6896	+	ENSG00000135486	HNRNPA1	protein_coding	chromosome	heterogeneous nuclear ribonucleoprotein A1 [Source:HGNC Symbol;Acc:HGNC:5031]	ENSG00000135486.17	HNRNPA1	3178	1.19	9.1	184	1.65e-27	6.27e-26	26.8
3	52524385	52535054	10670	-	ENSG00000168268	NT5DC2	protein_coding	chromosome	5'-nucleotidase domain containing 2 [Source:HGNC Symbol;Acc:HGNC:25717]	ENSG00000168268.11	NT5DC2	64943	2.08	5.35	183	1.74e-27	6.59e-26	26.8
12	57768471	57772119	3649	-	ENSG00000037897	METTL1	protein_coding	chromosome	methyltransferase like 1 [Source:HGNC Symbol;Acc:HGNC:7030]	ENSG00000037897.17	METTL1	4234	1.96	3.29	183	1.8e-27	6.82e-26	26.7
6	136231024	136250335	19312	-	ENSG00000146410	MTFR2	protein_coding	chromosome	mitochondrial fission regulator 2 [Source:HGNC Symbol;Acc:HGNC:21115]	ENSG00000146410.12	MTFR2	113115	2.1	1.79	183	1.86e-27	7.02e-26	26.7
7	33094797	33109404	14608	-	ENSG00000164610	RP9	protein_coding	chromosome	RP9 pre-mRNA splicing factor [Source:HGNC Symbol;Acc:HGNC:10288]	ENSG00000164610.9	RP9	6100	1.16	3.13	183	1.96e-27	7.38e-26	26.7
3	52075226	52154690	79465	-	ENSG00000164087	POC1A	protein_coding	chromosome	POC1 centriolar protein A [Source:HGNC Symbol;Acc:HGNC:24488]	ENSG00000164087.8	POC1A	25886	1.57	3.29	183	1.99e-27	7.48e-26	26.7
9	98731329	98796965	65637	-	ENSG00000165138	ANKS6	protein_coding	chromosome	ankyrin repeat and sterile alpha motif domain containing 6 [Source:HGNC Symbol;Acc:HGNC:26724]	ENSG00000165138.18	ANKS6	203286	1.3	5.19	183	2.1e-27	7.86e-26	26.7
5	54977867	55022671	44805	-	ENSG00000164283	ESM1	protein_coding	chromosome	endothelial cell specific molecule 1 [Source:HGNC Symbol;Acc:HGNC:3466]	ENSG00000164283.13	ESM1	11082	4.31	1.72	183	2.11e-27	7.89e-26	26.7
13	113177536	113208715	31180	-	ENSG00000126226	PCID2	protein_coding	chromosome	PCI domain containing 2 [Source:HGNC Symbol;Acc:HGNC:25653]	ENSG00000126226.22	PCID2	55795	1.37	5.04	182	2.2e-27	8.22e-26	26.7
7	74231499	74254458	22960	-	ENSG00000049541	RFC2	protein_coding	chromosome	replication factor C subunit 2 [Source:HGNC Symbol;Acc:HGNC:9970]	ENSG00000049541.11	RFC2	5982	1.19	4.28	182	2.21e-27	8.22e-26	26.7
10	79068966	79316528	247563	+	ENSG00000108175	ZMIZ1	protein_coding	chromosome	zinc finger MIZ-type containing 1 [Source:HGNC Symbol;Acc:HGNC:16493]	ENSG00000108175.17	ZMIZ1	57178	-0.977	6.67	182	2.22e-27	8.26e-26	26.7
1	93561741	93847150	285410	-	ENSG00000137936	BCAR3	protein_coding	chromosome	BCAR3 adaptor protein, NSP family member [Source:HGNC Symbol;Acc:HGNC:973]	ENSG00000137936.18	BCAR3	8412	-1.65	4.89	182	2.33e-27	8.62e-26	26.6
10	89701610	89774939	73330	+	ENSG00000138182	KIF20B	protein_coding	chromosome	kinesin family member 20B [Source:HGNC Symbol;Acc:HGNC:7212]	ENSG00000138182.14	KIF20B	9585	2.04	3.09	182	2.34e-27	8.65e-26	26.6
3	44761721	44873376	111656	+	ENSG00000163808	KIF15	protein_coding	chromosome	kinesin family member 15 [Source:HGNC Symbol;Acc:HGNC:17273]	ENSG00000163808.17	KIF15	56992	2.38	2.77	182	2.44e-27	9.01e-26	26.6
6	41921499	41933046	11548	+	ENSG00000112578	BYSL	protein_coding	chromosome	bystin like [Source:HGNC Symbol;Acc:HGNC:1157]	ENSG00000112578.10	BYSL	705	2.02	3.94	182	2.47e-27	9.09e-26	26.6
13	36998816	37009614	10799	+	ENSG00000120699	EXOSC8	protein_coding	chromosome	exosome component 8 [Source:HGNC Symbol;Acc:HGNC:17035]	ENSG00000120699.13	EXOSC8	11340	1.29	4.34	182	2.6e-27	9.56e-26	26.6
2	117814691	117832377	17687	+	ENSG00000088205	DDX18	protein_coding	chromosome	DEAD-box helicase 18 [Source:HGNC Symbol;Acc:HGNC:2741]	ENSG00000088205.13	DDX18	8886	1.16	5.51	181	2.66e-27	9.74e-26	26.6
11	62832342	62841809	9468	-	ENSG00000133316	WDR74	protein_coding	chromosome	WD repeat domain 74 [Source:HGNC Symbol;Acc:HGNC:25529]	ENSG00000133316.15	WDR74	54663	1.58	5.05	181	2.74e-27	1e-25	26.6
1	169662007	169854080	192074	+	ENSG00000000460	C1orf112	protein_coding	chromosome	chromosome 1 open reading frame 112 [Source:HGNC Symbol;Acc:HGNC:25565]	ENSG00000000460.17	C1orf112	55732	1.57	2.83	181	2.78e-27	1.02e-25	26.6
7	44796680	44824564	27885	+	ENSG00000196262	PPIA	protein_coding	chromosome	peptidylprolyl isomerase A [Source:HGNC Symbol;Acc:HGNC:9253]	ENSG00000196262.14	PPIA	5478	1.15	9.45	181	2.87e-27	1.05e-25	26.5
16	1962058	1964841	2784	-	ENSG00000140988	RPS2	protein_coding	chromosome	ribosomal protein S2 [Source:HGNC Symbol;Acc:HGNC:10404]	ENSG00000140988.16	RPS2	6187	1.52	10.4	181	2.99e-27	1.08e-25	26.5
1	223701593	223776018	74426	+	ENSG00000162909	CAPN2	protein_coding	chromosome	calpain 2 [Source:HGNC Symbol;Acc:HGNC:1479]	ENSG00000162909.18	CAPN2	824	-1.49	8.59	181	3.07e-27	1.11e-25	26.5
19	3538261	3574290	36030	-	ENSG00000161091	MFSD12	protein_coding	chromosome	major facilitator superfamily domain containing 12 [Source:HGNC Symbol;Acc:HGNC:28299]	ENSG00000161091.13	MFSD12	126321	1.17	5.66	181	3.14e-27	1.13e-25	26.5
17	75880335	75896951	16617	-	ENSG00000141569	TRIM65	protein_coding	chromosome	tripartite motif containing 65 [Source:HGNC Symbol;Acc:HGNC:27316]	ENSG00000141569.12	TRIM65	201292	1.1	4.86	181	3.17e-27	1.14e-25	26.5
7	50444128	50542535	98408	-	ENSG00000132436	FIGNL1	protein_coding	chromosome	fidgetin like 1 [Source:HGNC Symbol;Acc:HGNC:13286]	ENSG00000132436.11	FIGNL1	63979	2.09	2.83	180	3.64e-27	1.31e-25	26.4
16	11547722	11636381	88660	-	ENSG00000189067	LITAF	protein_coding	chromosome	lipopolysaccharide induced TNF factor [Source:HGNC Symbol;Acc:HGNC:16841]	ENSG00000189067.12	LITAF	9516	-1.59	7.47	180	3.66e-27	1.31e-25	26.4
11	75399515	75422280	22766	+	ENSG00000149273	RPS3	protein_coding	chromosome	ribosomal protein S3 [Source:HGNC Symbol;Acc:HGNC:10420]	ENSG00000149273.15	RPS3	6188	1.21	9.72	180	3.68e-27	1.32e-25	26.4
11	35138870	35232402	93533	+	ENSG00000026508	CD44	protein_coding	chromosome	CD44 molecule (Indian blood group) [Source:HGNC Symbol;Acc:HGNC:1681]	ENSG00000026508.18	CD44	960	2.15	6.83	180	3.7e-27	1.32e-25	26.4
1	53242364	53328469	86106	-	ENSG00000157193	LRP8	protein_coding	chromosome	LDL receptor related protein 8 [Source:HGNC Symbol;Acc:HGNC:6700]	ENSG00000157193.18	LRP8	7804	2.79	4.18	180	3.74e-27	1.33e-25	26.4
2	183117513	183161680	44168	+	ENSG00000163002	NUP35	protein_coding	chromosome	nucleoporin 35 [Source:HGNC Symbol;Acc:HGNC:29797]	ENSG00000163002.13	NUP35	129401	1.6	2.43	180	3.93e-27	1.4e-25	26.4
2	73233420	73253021	19602	+	ENSG00000135624	CCT7	protein_coding	chromosome	chaperonin containing TCP1 subunit 7 [Source:HGNC Symbol;Acc:HGNC:1622]	ENSG00000135624.16	CCT7	10574	1.16	7.27	180	4.03e-27	1.43e-25	26.4
19	40778216	40796942	18727	+	ENSG00000167578	RAB4B	protein_coding	chromosome	RAB4B, member RAS oncogene family [Source:HGNC Symbol;Acc:HGNC:9782]	ENSG00000167578.18	RAB4B	53916	-1.41	5.87	180	4.05e-27	1.43e-25	26.4
6	44246166	44253888	7723	+	ENSG00000096384	HSP90AB1	protein_coding	chromosome	heat shock protein 90 alpha family class B member 1 [Source:HGNC Symbol;Acc:HGNC:5258]	ENSG00000096384.20	HSP90AB1	3326	1.39	9.25	179	4.25e-27	1.5e-25	26.4
2	169791933	169812064	20132	+	ENSG00000138385	SSB	protein_coding	chromosome	small RNA binding exonuclease protection factor La [Source:HGNC Symbol;Acc:HGNC:11316]	ENSG00000138385.16	SSB	6741	1.35	5.41	179	4.25e-27	1.5e-25	26.4
16	11249619	11381662	132044	+	ENSG00000175643	RMI2	protein_coding	chromosome	RecQ mediated genome instability 2 [Source:HGNC Symbol;Acc:HGNC:28349]	ENSG00000175643.10	RMI2	116028	1.96	3.13	179	4.25e-27	1.5e-25	26.4
11	64244479	64246943	2465	-	ENSG00000173457	PPP1R14B	protein_coding	chromosome	protein phosphatase 1 regulatory inhibitor subunit 14B [Source:HGNC Symbol;Acc:HGNC:9057]	ENSG00000173457.11	PPP1R14B	26472	1.32	6.9	179	4.27e-27	1.5e-25	26.4
20	62387103	62388520	1418	+	ENSG00000171858	RPS21	protein_coding	chromosome	ribosomal protein S21 [Source:HGNC Symbol;Acc:HGNC:10409]	ENSG00000171858.18	RPS21	6227	1.51	8.46	179	4.33e-27	1.52e-25	26.4
11	66002228	66004149	1922	+	ENSG00000175334	BANF1	protein_coding	chromosome	barrier to autointegration factor 1 [Source:HGNC Symbol;Acc:HGNC:17397]	ENSG00000175334.8	BANF1	8815	1.3	6.26	179	4.35e-27	1.52e-25	26.4
17	76563710	76570544	6835	-	ENSG00000284526	AC015802.6	protein_coding	chromosome	novel protein	ENSG00000284526.1	AC015802.6	NA	1.7	4.73	179	4.4e-27	1.54e-25	26.4
2	215311956	215349773	37818	+	ENSG00000138363	ATIC	protein_coding	chromosome	5-aminoimidazole-4-carboxamide ribonucleotide formyltransferase/IMP cyclohydrolase [Source:HGNC Symbol;Acc:HGNC:794]	ENSG00000138363.15	ATIC	471	1.51	5.56	179	4.46e-27	1.55e-25	26.4
8	85177154	85217158	40005	+	ENSG00000133740	E2F5	protein_coding	chromosome	E2F transcription factor 5 [Source:HGNC Symbol;Acc:HGNC:3119]	ENSG00000133740.11	E2F5	1875	1.65	3.62	179	4.59e-27	1.6e-25	26.3
19	47349315	47382704	33390	+	ENSG00000134815	DHX34	protein_coding	chromosome	DExH-box helicase 34 [Source:HGNC Symbol;Acc:HGNC:16719]	ENSG00000134815.19	DHX34	9704	1.56	5.24	179	4.62e-27	1.6e-25	26.3
11	82899975	82958277	58303	+	ENSG00000165490	DDIAS	protein_coding	chromosome	DNA damage induced apoptosis suppressor [Source:HGNC Symbol;Acc:HGNC:26351]	ENSG00000165490.13	DDIAS	220042	2.71	1.9	179	4.68e-27	1.62e-25	26.3
2	127843553	127858155	14603	-	ENSG00000144231	POLR2D	protein_coding	chromosome	RNA polymerase II subunit D [Source:HGNC Symbol;Acc:HGNC:9191]	ENSG00000144231.11	POLR2D	5433	1.35	4.26	179	4.72e-27	1.63e-25	26.3
17	79833156	79839440	6285	-	ENSG00000141582	CBX4	protein_coding	chromosome	chromobox 4 [Source:HGNC Symbol;Acc:HGNC:1554]	ENSG00000141582.15	CBX4	8535	1.52	5.26	179	4.99e-27	1.72e-25	26.3
7	45100100	45112047	11948	-	ENSG00000136270	TBRG4	protein_coding	chromosome	transforming growth factor beta regulator 4 [Source:HGNC Symbol;Acc:HGNC:17443]	ENSG00000136270.14	TBRG4	9238	1.25	6.46	179	5.01e-27	1.72e-25	26.3
2	10721100	10785110	64011	+	ENSG00000143882	ATP6V1C2	protein_coding	chromosome	ATPase H+ transporting V1 subunit C2 [Source:HGNC Symbol;Acc:HGNC:18264]	ENSG00000143882.12	ATP6V1C2	245973	2.64	3.23	179	5.01e-27	1.72e-25	26.3
X	154477769	154479257	1489	-	ENSG00000196976	LAGE3	protein_coding	chromosome	L antigen family member 3 [Source:HGNC Symbol;Acc:HGNC:26058]	ENSG00000196976.7	LAGE3	8270	1.53	4.29	179	5.01e-27	1.72e-25	26.3
16	46578591	46621379	42789	-	ENSG00000171241	SHCBP1	protein_coding	chromosome	SHC binding and spindle associated 1 [Source:HGNC Symbol;Acc:HGNC:29547]	ENSG00000171241.9	SHCBP1	79801	1.95	2.69	179	5.04e-27	1.72e-25	26.3
5	149345430	149354583	9154	+	ENSG00000164284	GRPEL2	protein_coding	chromosome	GrpE like 2, mitochondrial [Source:HGNC Symbol;Acc:HGNC:21060]	ENSG00000164284.15	GRPEL2	134266	1.33	3.05	178	5.6e-27	1.91e-25	26.3
6	4994717	5004063	9347	-	ENSG00000124787	RPP40	protein_coding	chromosome	ribonuclease P/MRP subunit p40 [Source:HGNC Symbol;Acc:HGNC:20992]	ENSG00000124787.14	RPP40	10799	2.3	1.65	178	5.77e-27	1.97e-25	26.2
8	55773446	55826445	53000	+	ENSG00000137574	TGS1	protein_coding	chromosome	trimethylguanosine synthase 1 [Source:HGNC Symbol;Acc:HGNC:17843]	ENSG00000137574.11	TGS1	96764	1.26	4.13	178	5.89e-27	2e-25	26.2
17	81887835	81891586	3752	-	ENSG00000183684	ALYREF	protein_coding	chromosome	Aly/REF export factor [Source:HGNC Symbol;Acc:HGNC:19071]	ENSG00000183684.8	ALYREF	10189	1.31	6.08	178	5.94e-27	2.01e-25	26.2
9	35658875	35675866	16992	-	ENSG00000137135	ARHGEF39	protein_coding	chromosome	Rho guanine nucleotide exchange factor 39 [Source:HGNC Symbol;Acc:HGNC:25909]	ENSG00000137135.18	ARHGEF39	84904	1.5	4.04	178	6.06e-27	2.05e-25	26.2
20	56369389	56392337	22949	-	ENSG00000087586	AURKA	protein_coding	chromosome	aurora kinase A [Source:HGNC Symbol;Acc:HGNC:11393]	ENSG00000087586.17	AURKA	6790	2.05	4.47	178	6.08e-27	2.05e-25	26.2
1	220690363	220699153	8791	+	ENSG00000162817	C1orf115	protein_coding	chromosome	chromosome 1 open reading frame 115 [Source:HGNC Symbol;Acc:HGNC:25873]	ENSG00000162817.7	C1orf115	79762	-2.38	6.36	178	6.1e-27	2.06e-25	26.2
16	58231157	58283836	52680	+	ENSG00000103021	CCDC113	protein_coding	chromosome	coiled-coil domain containing 113 [Source:HGNC Symbol;Acc:HGNC:25002]	ENSG00000103021.9	CCDC113	29070	1.74	2.44	178	6.19e-27	2.08e-25	26.2
17	30831966	30895869	63904	+	ENSG00000176208	ATAD5	protein_coding	chromosome	ATPase family AAA domain containing 5 [Source:HGNC Symbol;Acc:HGNC:25752]	ENSG00000176208.9	ATAD5	79915	1.68	2.42	178	6.42e-27	2.15e-25	26.2
1	46246461	46278480	32020	+	ENSG00000085999	RAD54L	protein_coding	chromosome	RAD54 like [Source:HGNC Symbol;Acc:HGNC:9826]	ENSG00000085999.13	RAD54L	8438	2.42	3.4	177	6.48e-27	2.17e-25	26.2
10	100987367	100994403	7037	+	ENSG00000107815	TWNK	protein_coding	chromosome	twinkle mtDNA helicase [Source:HGNC Symbol;Acc:HGNC:1160]	ENSG00000107815.10	TWNK	56652	1.88	3.73	177	6.49e-27	2.17e-25	26.2
22	23894383	23895227	845	+	ENSG00000240972	MIF	protein_coding	chromosome	macrophage migration inhibitory factor [Source:HGNC Symbol;Acc:HGNC:7097]	ENSG00000240972.2	MIF	4282	1.71	8.13	177	6.58e-27	2.2e-25	26.2
20	31944337	31952046	7710	-	ENSG00000088356	PDRG1	protein_coding	chromosome	p53 and DNA damage regulated 1 [Source:HGNC Symbol;Acc:HGNC:16119]	ENSG00000088356.6	PDRG1	81572	1.25	4.37	177	6.66e-27	2.22e-25	26.2
7	549197	727650	178454	-	ENSG00000188191	PRKAR1B	protein_coding	chromosome	protein kinase cAMP-dependent type I regulatory subunit beta [Source:HGNC Symbol;Acc:HGNC:9390]	ENSG00000188191.15	PRKAR1B	5575	1.34	5.18	177	6.68e-27	2.22e-25	26.2
1	43970000	43973369	3370	+	ENSG00000132768	DPH2	protein_coding	chromosome	diphthamide biosynthesis 2 [Source:HGNC Symbol;Acc:HGNC:3004]	ENSG00000132768.14	DPH2	1802	1.58	4.63	177	6.7e-27	2.22e-25	26.2
8	144428775	144444440	15666	-	ENSG00000160949	TONSL	protein_coding	chromosome	tonsoku like, DNA repair protein [Source:HGNC Symbol;Acc:HGNC:7801]	ENSG00000160949.17	TONSL	4796	1.68	5.78	177	6.71e-27	2.22e-25	26.2
X	12791355	12824222	32868	+	ENSG00000101911	PRPS2	protein_coding	chromosome	phosphoribosyl pyrophosphate synthetase 2 [Source:HGNC Symbol;Acc:HGNC:9465]	ENSG00000101911.12	PRPS2	5634	1.4	4.94	177	6.82e-27	2.25e-25	26.2
CHR_HG2030_PATCH	133328924	133336336	7413	-	ENSG00000281309	SURF6	protein_coding	chromosome	surfeit 6 [Source:HGNC Symbol;Acc:HGNC:11478]	ENSG00000281309.2	SURF6	6838	1.26	6.16	177	6.83e-27	2.25e-25	26.2
19	58544064	58550722	6659	+	ENSG00000130726	TRIM28	protein_coding	chromosome	tripartite motif containing 28 [Source:HGNC Symbol;Acc:HGNC:16384]	ENSG00000130726.12	TRIM28	10155	1.36	7.87	177	6.84e-27	2.25e-25	26.2
4	120055623	120066858	11236	-	ENSG00000164109	MAD2L1	protein_coding	chromosome	mitotic arrest deficient 2 like 1 [Source:HGNC Symbol;Acc:HGNC:6763]	ENSG00000164109.14	MAD2L1	4085	2.62	3.73	177	7.09e-27	2.33e-25	26.1
17	8247618	8270491	22874	+	ENSG00000178921	PFAS	protein_coding	chromosome	phosphoribosylformylglycinamidine synthase [Source:HGNC Symbol;Acc:HGNC:8863]	ENSG00000178921.14	PFAS	5198	1.83	4.73	177	7.65e-27	2.51e-25	26.1
22	23768226	23784316	16091	+	ENSG00000099953	MMP11	protein_coding	chromosome	matrix metallopeptidase 11 [Source:HGNC Symbol;Acc:HGNC:7157]	ENSG00000099953.10	MMP11	4320	3.89	5.19	177	7.72e-27	2.52e-25	26.1
19	44890569	44903689	13121	+	ENSG00000130204	TOMM40	protein_coding	chromosome	translocase of outer mitochondrial membrane 40 [Source:HGNC Symbol;Acc:HGNC:18001]	ENSG00000130204.13	TOMM40	10452	1.67	6.54	177	7.77e-27	2.54e-25	26.1
1	25831913	25859458	27546	-	ENSG00000127423	AUNIP	protein_coding	chromosome	aurora kinase A and ninein interacting protein [Source:HGNC Symbol;Acc:HGNC:28363]	ENSG00000127423.10	AUNIP	79000	2.73	1.16	177	7.81e-27	2.54e-25	26.1
5	138178719	138187723	9005	+	ENSG00000112984	KIF20A	protein_coding	chromosome	kinesin family member 20A [Source:HGNC Symbol;Acc:HGNC:9787]	ENSG00000112984.12	KIF20A	10112	2.74	3.26	177	7.88e-27	2.56e-25	26.1
19	10251901	10260055	8155	+	ENSG00000105364	MRPL4	protein_coding	chromosome	mitochondrial ribosomal protein L4 [Source:HGNC Symbol;Acc:HGNC:14276]	ENSG00000105364.14	MRPL4	51073	1.21	5.99	176	8.31e-27	2.7e-25	26.1
3	108549864	108589644	39781	-	ENSG00000163507	CIP2A	protein_coding	chromosome	cell proliferation regulating inhibitor of protein phosphatase 2A [Source:HGNC Symbol;Acc:HGNC:29302]	ENSG00000163507.14	CIP2A	57650	2.21	2.29	176	8.54e-27	2.77e-25	26.1
4	158672125	158709623	37499	+	ENSG00000171503	ETFDH	protein_coding	chromosome	electron transfer flavoprotein dehydrogenase [Source:HGNC Symbol;Acc:HGNC:3483]	ENSG00000171503.12	ETFDH	2110	-1.42	4.74	176	9.18e-27	2.97e-25	26
2	27098889	27119128	20240	-	ENSG00000138028	CGREF1	protein_coding	chromosome	cell growth regulator with EF-hand domain 1 [Source:HGNC Symbol;Acc:HGNC:16962]	ENSG00000138028.16	CGREF1	10669	2.98	3.58	176	9.43e-27	3.04e-25	26
15	66336191	66386746	50556	-	ENSG00000075131	TIPIN	protein_coding	chromosome	TIMELESS interacting protein [Source:HGNC Symbol;Acc:HGNC:30750]	ENSG00000075131.10	TIPIN	54962	1.64	1.5	176	1.02e-26	3.27e-25	26
22	19783223	19854939	71717	-	ENSG00000185838	GNB1L	protein_coding	chromosome	G protein subunit beta 1 like [Source:HGNC Symbol;Acc:HGNC:4397]	ENSG00000185838.14	GNB1L	54584	1.71	2.82	175	1.02e-26	3.27e-25	26
17	43044295	43170245	125951	-	ENSG00000012048	BRCA1	protein_coding	chromosome	BRCA1 DNA repair associated [Source:HGNC Symbol;Acc:HGNC:1100]	ENSG00000012048.22	BRCA1	672	1.79	3.61	175	1.06e-26	3.39e-25	26
22	31160182	31207019	46838	+	ENSG00000138942	RNF185	protein_coding	chromosome	ring finger protein 185 [Source:HGNC Symbol;Acc:HGNC:26783]	ENSG00000138942.16	RNF185	91445	-0.89	5.32	175	1.08e-26	3.44e-25	26
11	63998558	64166113	167556	-	ENSG00000133315	MACROD1	protein_coding	chromosome	mono-ADP ribosylhydrolase 1 [Source:HGNC Symbol;Acc:HGNC:29598]	ENSG00000133315.11	MACROD1	28992	2.02	5.1	175	1.1e-26	3.53e-25	26
16	71637835	71724701	86867	-	ENSG00000040199	PHLPP2	protein_coding	chromosome	PH domain and leucine rich repeat protein phosphatase 2 [Source:HGNC Symbol;Acc:HGNC:29149]	ENSG00000040199.18	PHLPP2	23035	-2.15	6.07	175	1.11e-26	3.53e-25	26
22	38734725	38794143	59419	-	ENSG00000100242	SUN2	protein_coding	chromosome	Sad1 and UNC84 domain containing 2 [Source:HGNC Symbol;Acc:HGNC:14210]	ENSG00000100242.15	SUN2	25777	-1.08	7.46	175	1.12e-26	3.55e-25	26
3	42784298	42804531	20234	-	ENSG00000181061	HIGD1A	protein_coding	chromosome	HIG1 hypoxia inducible domain family member 1A [Source:HGNC Symbol;Acc:HGNC:29527]	ENSG00000181061.13	HIGD1A	25994	-1.98	7.42	175	1.13e-26	3.59e-25	25.9
1	109249539	109275751	26213	+	ENSG00000143126	CELSR2	protein_coding	chromosome	cadherin EGF LAG seven-pass G-type receptor 2 [Source:HGNC Symbol;Acc:HGNC:3231]	ENSG00000143126.8	CELSR2	1952	1.77	3.49	175	1.14e-26	3.62e-25	25.9
19	7395113	7472484	77372	+	ENSG00000104880	ARHGEF18	protein_coding	chromosome	Rho/Rac guanine nucleotide exchange factor 18 [Source:HGNC Symbol;Acc:HGNC:17090]	ENSG00000104880.18	ARHGEF18	23370	-1.64	7.36	175	1.15e-26	3.63e-25	25.9
5	160421855	160428739	6885	+	ENSG00000164611	PTTG1	protein_coding	chromosome	PTTG1 regulator of sister chromatid separation, securin [Source:HGNC Symbol;Acc:HGNC:9690]	ENSG00000164611.13	PTTG1	9232	2.36	4.07	175	1.17e-26	3.7e-25	25.9
16	85676198	85690073	13876	-	ENSG00000131153	GINS2	protein_coding	chromosome	GINS complex subunit 2 [Source:HGNC Symbol;Acc:HGNC:24575]	ENSG00000131153.9	GINS2	51659	2.38	3.51	175	1.26e-26	3.98e-25	25.9
14	73715122	73790285	75164	-	ENSG00000156030	ELMSAN1	protein_coding	chromosome	ELM2 and Myb/SANT domain containing 1 [Source:HGNC Symbol;Acc:HGNC:19853]	ENSG00000156030.13	ELMSAN1	91748	-1.39	6.31	175	1.27e-26	3.99e-25	25.9
4	184694085	184734130	40046	-	ENSG00000151725	CENPU	protein_coding	chromosome	centromere protein U [Source:HGNC Symbol;Acc:HGNC:21348]	ENSG00000151725.12	CENPU	79682	1.86	2.86	174	1.28e-26	4.03e-25	25.9
17	42567068	42573239	6172	+	ENSG00000108788	MLX	protein_coding	chromosome	MAX dimerization protein MLX [Source:HGNC Symbol;Acc:HGNC:11645]	ENSG00000108788.11	MLX	6945	-1.04	6.62	174	1.34e-26	4.19e-25	25.9
4	76306026	76311599	5574	+	ENSG00000118804	STBD1	protein_coding	chromosome	starch binding domain 1 [Source:HGNC Symbol;Acc:HGNC:24854]	ENSG00000118804.8	STBD1	8987	-1.77	4.77	174	1.37e-26	4.29e-25	25.9
11	65261920	65305589	43670	+	ENSG00000014138	POLA2	protein_coding	chromosome	DNA polymerase alpha 2, accessory subunit [Source:HGNC Symbol;Acc:HGNC:30073]	ENSG00000014138.9	POLA2	23649	1.53	4.04	174	1.44e-26	4.48e-25	25.8
2	73254682	73284431	29750	-	ENSG00000163013	FBXO41	protein_coding	chromosome	F-box protein 41 [Source:HGNC Symbol;Acc:HGNC:29409]	ENSG00000163013.11	FBXO41	150726	2.01	4.35	174	1.48e-26	4.6e-25	25.8
16	23677656	23690367	12712	+	ENSG00000166851	PLK1	protein_coding	chromosome	polo like kinase 1 [Source:HGNC Symbol;Acc:HGNC:9077]	ENSG00000166851.15	PLK1	5347	1.66	4.84	174	1.49e-26	4.64e-25	25.8
X	151396515	151409364	12850	+	ENSG00000160131	VMA21	protein_coding	chromosome	vacuolar ATPase assembly factor VMA21 [Source:HGNC Symbol;Acc:HGNC:22082]	ENSG00000160131.13	VMA21	203547	1.08	3.86	174	1.5e-26	4.66e-25	25.8
9	135499984	135504673	4690	+	ENSG00000122140	MRPS2	protein_coding	chromosome	mitochondrial ribosomal protein S2 [Source:HGNC Symbol;Acc:HGNC:14495]	ENSG00000122140.11	MRPS2	51116	1.4	5.46	174	1.51e-26	4.68e-25	25.8
10	13099449	13138308	38860	+	ENSG00000123240	OPTN	protein_coding	chromosome	optineurin [Source:HGNC Symbol;Acc:HGNC:17142]	ENSG00000123240.17	OPTN	10133	-1.3	6.81	174	1.59e-26	4.9e-25	25.8
19	10654261	10692417	38157	+	ENSG00000129351	ILF3	protein_coding	chromosome	interleukin enhancer binding factor 3 [Source:HGNC Symbol;Acc:HGNC:6038]	ENSG00000129351.17	ILF3	3609	1.1	8.16	174	1.59e-26	4.9e-25	25.8
2	135905881	135986100	80220	-	ENSG00000115866	DARS	protein_coding	chromosome	aspartyl-tRNA synthetase [Source:HGNC Symbol;Acc:HGNC:2678]	ENSG00000115866.11	DARS	1615	1.2	5.11	174	1.6e-26	4.91e-25	25.8
1	246566444	246668595	102152	+	ENSG00000162852	CNST	protein_coding	chromosome	consortin, connexin sorting protein [Source:HGNC Symbol;Acc:HGNC:26486]	ENSG00000162852.14	CNST	163882	-1.5	5.36	174	1.6e-26	4.91e-25	25.8
10	102918294	103090222	171929	+	ENSG00000148842	CNNM2	protein_coding	chromosome	cyclin and CBS domain divalent metal cation transport mediator 2 [Source:HGNC Symbol;Acc:HGNC:103]	ENSG00000148842.18	CNNM2	54805	-1.96	4.98	173	1.62e-26	4.96e-25	25.8
10	13161554	13211104	49551	+	ENSG00000065328	MCM10	protein_coding	chromosome	minichromosome maintenance 10 replication initiation factor [Source:HGNC Symbol;Acc:HGNC:18043]	ENSG00000065328.16	MCM10	55388	2.42	2.44	173	1.64e-26	5.02e-25	25.8
9	35073835	35080016	6182	-	ENSG00000221829	FANCG	protein_coding	chromosome	FA complementation group G [Source:HGNC Symbol;Acc:HGNC:3588]	ENSG00000221829.9	FANCG	2189	1.59	4.04	173	1.65e-26	5.04e-25	25.8
9	69035563	69100178	64616	+	ENSG00000165060	FXN	protein_coding	chromosome	frataxin [Source:HGNC Symbol;Acc:HGNC:3951]	ENSG00000165060.14	FXN	2395	1.69	3.21	173	1.69e-26	5.17e-25	25.8
15	74890005	74902219	12215	+	ENSG00000178802	MPI	protein_coding	chromosome	mannose phosphate isomerase [Source:HGNC Symbol;Acc:HGNC:7216]	ENSG00000178802.18	MPI	4351	-1.17	5.33	173	1.7e-26	5.17e-25	25.8
6	33391823	33409896	18074	+	ENSG00000237649	KIFC1	protein_coding	chromosome	kinesin family member C1 [Source:HGNC Symbol;Acc:HGNC:6389]	ENSG00000237649.8	KIFC1	3833	2.34	4.5	173	1.7e-26	5.17e-25	25.8
5	175917873	176034680	116808	-	ENSG00000051596	THOC3	protein_coding	chromosome	THO complex 3 [Source:HGNC Symbol;Acc:HGNC:19072]	ENSG00000051596.9	THOC3	84321	1.53	5.16	173	1.72e-26	5.23e-25	25.8
14	64945814	64973226	27413	-	ENSG00000139998	RAB15	protein_coding	chromosome	RAB15, member RAS oncogene family [Source:HGNC Symbol;Acc:HGNC:20150]	ENSG00000139998.15	RAB15	376267	1.81	5.89	173	1.82e-26	5.52e-25	25.7
1	27773219	27824443	51225	+	ENSG00000117758	STX12	protein_coding	chromosome	syntaxin 12 [Source:HGNC Symbol;Acc:HGNC:11430]	ENSG00000117758.14	STX12	23673	-1.26	5.41	173	1.85e-26	5.58e-25	25.7
16	81006498	81033114	26617	+	ENSG00000166451	CENPN	protein_coding	chromosome	centromere protein N [Source:HGNC Symbol;Acc:HGNC:30873]	ENSG00000166451.13	CENPN	55839	2.2	2.85	173	1.86e-26	5.6e-25	25.7
20	37983007	38033461	50455	-	ENSG00000101407	TTI1	protein_coding	chromosome	TELO2 interacting protein 1 [Source:HGNC Symbol;Acc:HGNC:29029]	ENSG00000101407.13	TTI1	9675	1.29	4.34	173	1.87e-26	5.64e-25	25.7
12	55716037	55720087	4051	+	ENSG00000135441	BLOC1S1	protein_coding	chromosome	biogenesis of lysosomal organelles complex 1 subunit 1 [Source:HGNC Symbol;Acc:HGNC:4200]	ENSG00000135441.7	BLOC1S1	2647	-1.01	6.46	173	1.91e-26	5.73e-25	25.7
11	63813456	63827716	14261	+	ENSG00000168005	SPINDOC	protein_coding	chromosome	spindlin interactor and repressor of chromatin binding [Source:HGNC Symbol;Acc:HGNC:25115]	ENSG00000168005.9	SPINDOC	144097	1.77	4.22	173	1.94e-26	5.82e-25	25.7
6	149566294	149591748	25455	+	ENSG00000055211	GINM1	protein_coding	chromosome	glycoprotein integral membrane 1 [Source:HGNC Symbol;Acc:HGNC:21074]	ENSG00000055211.14	GINM1	116254	-1.25	4.98	173	2.01e-26	6.03e-25	25.7
3	99817837	100181732	363896	+	ENSG00000184220	CMSS1	protein_coding	chromosome	cms1 ribosomal small subunit homolog [Source:HGNC Symbol;Acc:HGNC:28666]	ENSG00000184220.12	CMSS1	84319	2.08	3.46	172	2.11e-26	6.31e-25	25.7
19	2427638	2456959	29322	-	ENSG00000176619	LMNB2	protein_coding	chromosome	lamin B2 [Source:HGNC Symbol;Acc:HGNC:6638]	ENSG00000176619.13	LMNB2	84823	1.18	6.62	172	2.15e-26	6.43e-25	25.7
20	2461634	2470853	9220	-	ENSG00000125835	SNRPB	protein_coding	chromosome	small nuclear ribonucleoprotein polypeptides B and B1 [Source:HGNC Symbol;Acc:HGNC:11153]	ENSG00000125835.18	SNRPB	6628	1.35	7.22	172	2.19e-26	6.53e-25	25.7
20	57351223	57379211	27989	+	ENSG00000101146	RAE1	protein_coding	chromosome	ribonucleic acid export 1 [Source:HGNC Symbol;Acc:HGNC:9828]	ENSG00000101146.13	RAE1	8480	1.23	4.83	172	2.23e-26	6.64e-25	25.7
1	43358981	43363203	4223	+	ENSG00000117399	CDC20	protein_coding	chromosome	cell division cycle 20 [Source:HGNC Symbol;Acc:HGNC:1723]	ENSG00000117399.14	CDC20	991	2.78	4.97	172	2.34e-26	6.94e-25	25.6
7	4682295	4771442	89148	+	ENSG00000164916	FOXK1	protein_coding	chromosome	forkhead box K1 [Source:HGNC Symbol;Acc:HGNC:23480]	ENSG00000164916.11	FOXK1	221937	1.03	5.95	172	2.34e-26	6.94e-25	25.6
1	45583846	45618904	35059	+	ENSG00000132780	NASP	protein_coding	chromosome	nuclear autoantigenic sperm protein [Source:HGNC Symbol;Acc:HGNC:7644]	ENSG00000132780.17	NASP	4678	0.988	6.12	172	2.36e-26	6.96e-25	25.6
X	63347228	63351332	4105	-	ENSG00000186767	SPIN4	protein_coding	chromosome	spindlin family member 4 [Source:HGNC Symbol;Acc:HGNC:27040]	ENSG00000186767.7	SPIN4	139886	1.76	2.64	172	2.36e-26	6.96e-25	25.6
19	48115445	48170603	55159	-	ENSG00000105486	LIG1	protein_coding	chromosome	DNA ligase 1 [Source:HGNC Symbol;Acc:HGNC:6598]	ENSG00000105486.14	LIG1	3978	1.74	5.34	171	2.62e-26	7.72e-25	25.6
11	67583595	67586656	3062	+	ENSG00000084207	GSTP1	protein_coding	chromosome	glutathione S-transferase pi 1 [Source:HGNC Symbol;Acc:HGNC:4638]	ENSG00000084207.17	GSTP1	2950	1.32	8.35	171	2.73e-26	8.03e-25	25.6
10	42782795	42834937	52143	+	ENSG00000165733	BMS1	protein_coding	chromosome	BMS1 ribosome biogenesis factor [Source:HGNC Symbol;Acc:HGNC:23505]	ENSG00000165733.8	BMS1	9790	0.995	5.2	171	2.76e-26	8.11e-25	25.6
6	126340174	126348875	8702	+	ENSG00000203760	CENPW	protein_coding	chromosome	centromere protein W [Source:HGNC Symbol;Acc:HGNC:21488]	ENSG00000203760.8	CENPW	387103	2.33	3.01	171	2.82e-26	8.26e-25	25.5
1	54184041	54225464	41424	+	ENSG00000116221	MRPL37	protein_coding	chromosome	mitochondrial ribosomal protein L37 [Source:HGNC Symbol;Acc:HGNC:14034]	ENSG00000116221.15	MRPL37	51253	1.15	5.64	171	2.86e-26	8.38e-25	25.5
9	136206333	136245841	39509	-	ENSG00000165661	QSOX2	protein_coding	chromosome	quiescin sulfhydryl oxidase 2 [Source:HGNC Symbol;Acc:HGNC:30249]	ENSG00000165661.16	QSOX2	169714	1.54	4.69	171	2.91e-26	8.51e-25	25.5
9	35673918	35681159	7242	+	ENSG00000107159	CA9	protein_coding	chromosome	carbonic anhydrase 9 [Source:HGNC Symbol;Acc:HGNC:1383]	ENSG00000107159.13	CA9	768	5.75	4.5	171	3.01e-26	8.76e-25	25.5
12	57819927	57846729	26803	-	ENSG00000175215	CTDSP2	protein_coding	chromosome	CTD small phosphatase 2 [Source:HGNC Symbol;Acc:HGNC:17077]	ENSG00000175215.11	CTDSP2	10106	-1.16	7.96	170	3.19e-26	9.29e-25	25.5
14	21209136	21269494	60359	-	ENSG00000092199	HNRNPC	protein_coding	chromosome	heterogeneous nuclear ribonucleoprotein C (C1/C2) [Source:HGNC Symbol;Acc:HGNC:5035]	ENSG00000092199.17	HNRNPC	3183	0.906	7.79	170	3.2e-26	9.29e-25	25.5
10	56357227	56361273	4047	-	ENSG00000122952	ZWINT	protein_coding	chromosome	ZW10 interacting kinetochore protein [Source:HGNC Symbol;Acc:HGNC:13195]	ENSG00000122952.17	ZWINT	11130	1.82	4.67	170	3.26e-26	9.45e-25	25.5
14	102080738	102139699	58962	-	ENSG00000080824	HSP90AA1	protein_coding	chromosome	heat shock protein 90 alpha family class A member 1 [Source:HGNC Symbol;Acc:HGNC:5253]	ENSG00000080824.18	HSP90AA1	3320	1.24	8.96	170	3.27e-26	9.47e-25	25.5
16	69326913	69330588	3676	-	ENSG00000258429	PDF	protein_coding	chromosome	peptide deformylase, mitochondrial [Source:HGNC Symbol;Acc:HGNC:30012]	ENSG00000258429.2	PDF	64146	1.32	3.83	170	3.28e-26	9.47e-25	25.5
3	100334739	100361635	26897	+	ENSG00000114021	NIT2	protein_coding	chromosome	nitrilase family member 2 [Source:HGNC Symbol;Acc:HGNC:29878]	ENSG00000114021.12	NIT2	56954	1.33	4.69	170	3.34e-26	9.63e-25	25.5
5	34915677	34925996	10320	+	ENSG00000113460	BRIX1	protein_coding	chromosome	biogenesis of ribosomes BRX1 [Source:HGNC Symbol;Acc:HGNC:24170]	ENSG00000113460.13	BRIX1	55299	1.76	4.07	170	3.38e-26	9.72e-25	25.5
17	79778148	79787983	9836	+	ENSG00000173894	CBX2	protein_coding	chromosome	chromobox 2 [Source:HGNC Symbol;Acc:HGNC:1552]	ENSG00000173894.11	CBX2	84733	3.53	3.02	170	3.46e-26	9.93e-25	25.5
13	51082119	51200252	118134	-	ENSG00000226792	C13orf42	protein_coding	chromosome	chromosome 13 open reading frame 42 [Source:HGNC Symbol;Acc:HGNC:42693]	ENSG00000226792.7	C13orf42	647166	3.27	2.09	170	3.54e-26	1.02e-24	25.5
6	152970519	152983579	13061	-	ENSG00000112029	FBXO5	protein_coding	chromosome	F-box protein 5 [Source:HGNC Symbol;Acc:HGNC:13584]	ENSG00000112029.10	FBXO5	26271	1.72	2.43	170	3.57e-26	1.02e-24	25.4
19	51012739	51020175	7437	-	ENSG00000129451	KLK10	protein_coding	chromosome	kallikrein related peptidase 10 [Source:HGNC Symbol;Acc:HGNC:6358]	ENSG00000129451.12	KLK10	5655	3.71	4.47	170	3.71e-26	1.06e-24	25.4
10	102743948	102834516	90569	+	ENSG00000166272	WBP1L	protein_coding	chromosome	WW domain binding protein 1 like [Source:HGNC Symbol;Acc:HGNC:23510]	ENSG00000166272.18	WBP1L	54838	-0.913	5.51	170	3.75e-26	1.07e-24	25.4
1	43525187	43623666	98480	+	ENSG00000142949	PTPRF	protein_coding	chromosome	protein tyrosine phosphatase receptor type F [Source:HGNC Symbol;Acc:HGNC:9670]	ENSG00000142949.17	PTPRF	5792	-1.25	9.06	170	3.86e-26	1.1e-24	25.4
15	90717346	90816166	98821	+	ENSG00000197299	BLM	protein_coding	chromosome	BLM RecQ like helicase [Source:HGNC Symbol;Acc:HGNC:1058]	ENSG00000197299.12	BLM	641	1.68	3.11	170	3.95e-26	1.12e-24	25.4
21	29055805	29073797	17993	-	ENSG00000156261	CCT8	protein_coding	chromosome	chaperonin containing TCP1 subunit 8 [Source:HGNC Symbol;Acc:HGNC:1623]	ENSG00000156261.13	CCT8	10694	1.1	6.36	169	4.08e-26	1.16e-24	25.4
16	5084284	5097795	13512	-	ENSG00000118894	EEF2KMT	protein_coding	chromosome	eukaryotic elongation factor 2 lysine methyltransferase [Source:HGNC Symbol;Acc:HGNC:32221]	ENSG00000118894.15	EEF2KMT	196483	1.31	3.4	169	4.24e-26	1.2e-24	25.4
2	264140	278283	14144	+	ENSG00000143727	ACP1	protein_coding	chromosome	acid phosphatase 1 [Source:HGNC Symbol;Acc:HGNC:122]	ENSG00000143727.16	ACP1	52	0.807	5.72	169	4.25e-26	1.2e-24	25.4
6	1312098	1314758	2661	+	ENSG00000164379	FOXQ1	protein_coding	chromosome	forkhead box Q1 [Source:HGNC Symbol;Acc:HGNC:20951]	ENSG00000164379.7	FOXQ1	94234	4.71	5.45	169	4.28e-26	1.21e-24	25.4
1	15756607	15786594	29988	+	ENSG00000162458	FBLIM1	protein_coding	chromosome	filamin binding LIM protein 1 [Source:HGNC Symbol;Acc:HGNC:24686]	ENSG00000162458.13	FBLIM1	54751	-1.8	7.72	169	4.32e-26	1.22e-24	25.4
11	3854527	4093210	238684	+	ENSG00000167323	STIM1	protein_coding	chromosome	stromal interaction molecule 1 [Source:HGNC Symbol;Acc:HGNC:11386]	ENSG00000167323.11	STIM1	6786	-1.05	5.83	169	4.33e-26	1.22e-24	25.4
1	100345001	100520277	175277	+	ENSG00000079335	CDC14A	protein_coding	chromosome	cell division cycle 14A [Source:HGNC Symbol;Acc:HGNC:1718]	ENSG00000079335.20	CDC14A	8556	-2.05	3.78	169	4.42e-26	1.24e-24	25.4
2	10120698	10211725	91028	+	ENSG00000171848	RRM2	protein_coding	chromosome	ribonucleotide reductase regulatory subunit M2 [Source:HGNC Symbol;Acc:HGNC:10452]	ENSG00000171848.15	RRM2	6241	2.57	5.13	169	4.45e-26	1.25e-24	25.4
4	1712891	1745176	32286	+	ENSG00000013810	TACC3	protein_coding	chromosome	transforming acidic coiled-coil containing protein 3 [Source:HGNC Symbol;Acc:HGNC:11524]	ENSG00000013810.19	TACC3	10460	1.7	5.57	169	4.52e-26	1.27e-24	25.3
7	44826791	44848083	21293	-	ENSG00000105968	H2AFV	protein_coding	chromosome	H2A histone family member V [Source:HGNC Symbol;Acc:HGNC:20664]	ENSG00000105968.18	H2AFV	94239	0.806	6.13	169	4.94e-26	1.38e-24	25.3
11	28020619	28108156	87538	-	ENSG00000121621	KIF18A	protein_coding	chromosome	kinesin family member 18A [Source:HGNC Symbol;Acc:HGNC:29441]	ENSG00000121621.7	KIF18A	81930	2.14	1.83	169	4.94e-26	1.38e-24	25.3
3	32105689	32168713	63025	+	ENSG00000152642	GPD1L	protein_coding	chromosome	glycerol-3-phosphate dehydrogenase 1 like [Source:HGNC Symbol;Acc:HGNC:28956]	ENSG00000152642.10	GPD1L	23171	-1.38	5.98	169	4.99e-26	1.39e-24	25.3
20	25612935	25624014	11080	-	ENSG00000170191	NANP	protein_coding	chromosome	N-acetylneuraminic acid phosphatase [Source:HGNC Symbol;Acc:HGNC:16140]	ENSG00000170191.5	NANP	140838	1.83	2.21	168	5.1e-26	1.42e-24	25.3
19	48993562	49015970	22409	+	ENSG00000183207	RUVBL2	protein_coding	chromosome	RuvB like AAA ATPase 2 [Source:HGNC Symbol;Acc:HGNC:10475]	ENSG00000183207.14	RUVBL2	10856	1.2	6.24	168	5.16e-26	1.43e-24	25.3
CHR_HSCHR16_3_CTG1	4427764	4458734	30971	+	ENSG00000276726	DNAJA3	protein_coding	chromosome	DnaJ heat shock protein family (Hsp40) member A3 [Source:HGNC Symbol;Acc:HGNC:11808]	ENSG00000276726.4	DNAJA3	9093	1.08	5.45	168	5.38e-26	1.49e-24	25.3
17	4004445	4143030	138586	-	ENSG00000074755	ZZEF1	protein_coding	chromosome	zinc finger ZZ-type and EF-hand domain containing 1 [Source:HGNC Symbol;Acc:HGNC:29027]	ENSG00000074755.15	ZZEF1	23140	-1.81	7.96	168	5.46e-26	1.51e-24	25.3
10	20779973	21174187	394215	-	ENSG00000078114	NEBL	protein_coding	chromosome	nebulette [Source:HGNC Symbol;Acc:HGNC:16932]	ENSG00000078114.18	NEBL	10529	1.68	4.7	168	5.48e-26	1.52e-24	25.3
6	157700387	157945077	244691	+	ENSG00000130340	SNX9	protein_coding	chromosome	sorting nexin 9 [Source:HGNC Symbol;Acc:HGNC:14973]	ENSG00000130340.16	SNX9	51429	-0.995	6.75	168	5.64e-26	1.56e-24	25.2
6	85607785	85643792	36008	-	ENSG00000135316	SYNCRIP	protein_coding	chromosome	synaptotagmin binding cytoplasmic RNA interacting protein [Source:HGNC Symbol;Acc:HGNC:16918]	ENSG00000135316.18	SYNCRIP	10492	1.13	6.5	168	5.69e-26	1.57e-24	25.2
1	151759647	151763496	3850	-	ENSG00000143436	MRPL9	protein_coding	chromosome	mitochondrial ribosomal protein L9 [Source:HGNC Symbol;Acc:HGNC:14277]	ENSG00000143436.11	MRPL9	65005	0.995	4.94	168	5.75e-26	1.58e-24	25.2
12	132687587	132704985	17399	+	ENSG00000176894	PXMP2	protein_coding	chromosome	peroxisomal membrane protein 2 [Source:HGNC Symbol;Acc:HGNC:9716]	ENSG00000176894.10	PXMP2	5827	-1.24	5.22	168	5.8e-26	1.59e-24	25.2
14	77098126	77117287	19162	+	ENSG00000198894	CIPC	protein_coding	chromosome	CLOCK interacting pacemaker [Source:HGNC Symbol;Acc:HGNC:20365]	ENSG00000198894.8	CIPC	85457	-1.32	5.32	168	5.8e-26	1.59e-24	25.2
1	52372829	52404423	31595	-	ENSG00000085840	ORC1	protein_coding	chromosome	origin recognition complex subunit 1 [Source:HGNC Symbol;Acc:HGNC:8487]	ENSG00000085840.13	ORC1	4998	2.01	2.65	168	5.93e-26	1.62e-24	25.2
1	32333839	32336233	2395	-	ENSG00000175130	MARCKSL1	protein_coding	chromosome	MARCKS like 1 [Source:HGNC Symbol;Acc:HGNC:7142]	ENSG00000175130.7	MARCKSL1	65108	1.26	7.51	168	6.1e-26	1.67e-24	25.2
2	28894667	28948219	53553	+	ENSG00000163811	WDR43	protein_coding	chromosome	WD repeat domain 43 [Source:HGNC Symbol;Acc:HGNC:28945]	ENSG00000163811.12	WDR43	23160	1.81	4.83	168	6.19e-26	1.69e-24	25.2
9	127706988	127716002	9015	+	ENSG00000160401	CFAP157	protein_coding	chromosome	cilia and flagella associated protein 157 [Source:HGNC Symbol;Acc:HGNC:27843]	ENSG00000160401.15	CFAP157	286207	2.42	1.57	168	6.24e-26	1.7e-24	25.2
4	55595229	55636698	41470	-	ENSG00000109255	NMU	protein_coding	chromosome	neuromedin U [Source:HGNC Symbol;Acc:HGNC:7859]	ENSG00000109255.11	NMU	10874	4.13	1.62	168	6.37e-26	1.73e-24	25.2
2	121726945	121736911	9967	-	ENSG00000155438	NIFK	protein_coding	chromosome	nucleolar protein interacting with the FHA domain of MKI67 [Source:HGNC Symbol;Acc:HGNC:17838]	ENSG00000155438.12	NIFK	84365	1.48	4.31	167	6.41e-26	1.74e-24	25.2
14	105140982	105168824	27843	-	ENSG00000184916	JAG2	protein_coding	chromosome	jagged canonical Notch ligand 2 [Source:HGNC Symbol;Acc:HGNC:6189]	ENSG00000184916.9	JAG2	3714	2.21	5.77	167	6.41e-26	1.74e-24	25.2
19	11131520	11155808	24289	-	ENSG00000161888	SPC24	protein_coding	chromosome	SPC24 component of NDC80 kinetochore complex [Source:HGNC Symbol;Acc:HGNC:26913]	ENSG00000161888.11	SPC24	147841	1.89	2.92	167	6.45e-26	1.74e-24	25.2
X	24693909	24996986	303078	+	ENSG00000101868	POLA1	protein_coding	chromosome	DNA polymerase alpha 1, catalytic subunit [Source:HGNC Symbol;Acc:HGNC:9173]	ENSG00000101868.11	POLA1	5422	1.87	3.67	167	6.49e-26	1.75e-24	25.2
2	96248516	96265994	17479	-	ENSG00000135956	TMEM127	protein_coding	chromosome	transmembrane protein 127 [Source:HGNC Symbol;Acc:HGNC:26038]	ENSG00000135956.8	TMEM127	55654	-1.39	6.93	167	6.52e-26	1.76e-24	25.2
11	94415578	94493908	78331	-	ENSG00000020922	MRE11	protein_coding	chromosome	MRE11 homolog, double strand break repair nuclease [Source:HGNC Symbol;Acc:HGNC:7230]	ENSG00000020922.12	MRE11	4361	1.37	4.47	167	6.55e-26	1.76e-24	25.2
16	30114105	30123506	9402	-	ENSG00000102882	MAPK3	protein_coding	chromosome	mitogen-activated protein kinase 3 [Source:HGNC Symbol;Acc:HGNC:6877]	ENSG00000102882.12	MAPK3	5595	-1.32	7.71	167	6.87e-26	1.85e-24	25.2
1	15736258	15741392	5135	+	ENSG00000162461	SLC25A34	protein_coding	chromosome	solute carrier family 25 member 34 [Source:HGNC Symbol;Acc:HGNC:27653]	ENSG00000162461.8	SLC25A34	284723	-2.38	3.44	167	6.99e-26	1.87e-24	25.2
12	31073860	31104799	30940	+	ENSG00000013573	DDX11	protein_coding	chromosome	DEAD/H-box helicase 11 [Source:HGNC Symbol;Acc:HGNC:2736]	ENSG00000013573.17	DDX11	1663	1.63	6.27	167	7.1e-26	1.9e-24	25.1
6	20401879	20493714	91836	+	ENSG00000112242	E2F3	protein_coding	chromosome	E2F transcription factor 3 [Source:HGNC Symbol;Acc:HGNC:3115]	ENSG00000112242.15	E2F3	1871	1.28	4.07	167	7.32e-26	1.96e-24	25.1
1	1232237	1235041	2805	+	ENSG00000176022	B3GALT6	protein_coding	chromosome	beta-1,3-galactosyltransferase 6 [Source:HGNC Symbol;Acc:HGNC:17978]	ENSG00000176022.7	B3GALT6	126792	1.32	4.45	167	7.55e-26	2.01e-24	25.1
9	92297358	92325636	28279	-	ENSG00000198000	NOL8	protein_coding	chromosome	nucleolar protein 8 [Source:HGNC Symbol;Acc:HGNC:23387]	ENSG00000198000.12	NOL8	55035	1.24	4.62	167	7.75e-26	2.06e-24	25.1
7	2537810	2555694	17885	-	ENSG00000106009	BRAT1	protein_coding	chromosome	BRCA1 associated ATM activator 1 [Source:HGNC Symbol;Acc:HGNC:21701]	ENSG00000106009.16	BRAT1	221927	1.06	6.27	167	7.76e-26	2.06e-24	25.1
8	120445400	120542133	96734	+	ENSG00000172167	MTBP	protein_coding	chromosome	MDM2 binding protein [Source:HGNC Symbol;Acc:HGNC:7417]	ENSG00000172167.8	MTBP	27085	2.1	1.95	167	7.91e-26	2.1e-24	25.1
6	89146055	89165565	19511	+	ENSG00000146281	PM20D2	protein_coding	chromosome	peptidase M20 domain containing 2 [Source:HGNC Symbol;Acc:HGNC:21408]	ENSG00000146281.6	PM20D2	135293	1.8	4.14	167	8.07e-26	2.14e-24	25.1
3	160432445	160485773	53329	-	ENSG00000213186	TRIM59	protein_coding	chromosome	tripartite motif containing 59 [Source:HGNC Symbol;Acc:HGNC:30834]	ENSG00000213186.8	TRIM59	286827	1.35	2.61	166	8.14e-26	2.16e-24	25.1
7	151057210	151076526	19317	+	ENSG00000164889	SLC4A2	protein_coding	chromosome	solute carrier family 4 member 2 [Source:HGNC Symbol;Acc:HGNC:11028]	ENSG00000164889.14	SLC4A2	6522	1.56	6.94	166	8.19e-26	2.16e-24	25.1
10	69630247	69633596	3350	+	ENSG00000171224	FAM241B	protein_coding	chromosome	family with sequence similarity 241 member B [Source:HGNC Symbol;Acc:HGNC:23519]	ENSG00000171224.9	FAM241B	219738	1.98	1.94	166	8.38e-26	2.21e-24	25.1
1	180269653	180502954	233302	-	ENSG00000230124	ACBD6	protein_coding	chromosome	acyl-CoA binding domain containing 6 [Source:HGNC Symbol;Acc:HGNC:23339]	ENSG00000230124.8	ACBD6	84320	1.15	4.51	166	8.39e-26	2.21e-24	25.1
11	32090904	32105755	14852	+	ENSG00000049449	RCN1	protein_coding	chromosome	reticulocalbin 1 [Source:HGNC Symbol;Acc:HGNC:9934]	ENSG00000049449.9	RCN1	5954	1.7	6.39	166	8.62e-26	2.27e-24	25.1
6	53794497	53924125	129629	+	ENSG00000137269	LRRC1	protein_coding	chromosome	leucine rich repeat containing 1 [Source:HGNC Symbol;Acc:HGNC:14307]	ENSG00000137269.15	LRRC1	55227	-1.71	6.16	166	8.72e-26	2.29e-24	25.1
21	33503931	33543491	39561	-	ENSG00000159131	GART	protein_coding	chromosome	phosphoribosylglycinamide formyltransferase, phosphoribosylglycinamide synthetase, phosphoribosylaminoimidazole synthetase [Source:HGNC Symbol;Acc:HGNC:4163]	ENSG00000159131.17	GART	2618	1.3	5.25	166	8.92e-26	2.34e-24	25
5	69167135	69178245	11111	+	ENSG00000134057	CCNB1	protein_coding	chromosome	cyclin B1 [Source:HGNC Symbol;Acc:HGNC:1579]	ENSG00000134057.15	CCNB1	891	2.62	4.75	166	8.97e-26	2.35e-24	25
17	44708608	44752264	43657	+	ENSG00000161692	DBF4B	protein_coding	chromosome	DBF4 zinc finger B [Source:HGNC Symbol;Acc:HGNC:17883]	ENSG00000161692.18	DBF4B	80174	1.36	3.41	166	9.08e-26	2.37e-24	25
17	78174091	78187233	13143	-	ENSG00000167900	TK1	protein_coding	chromosome	thymidine kinase 1 [Source:HGNC Symbol;Acc:HGNC:11830]	ENSG00000167900.12	TK1	7083	2.12	5.52	166	9.34e-26	2.44e-24	25
12	56731296	56752374	21079	-	ENSG00000198056	PRIM1	protein_coding	chromosome	DNA primase subunit 1 [Source:HGNC Symbol;Acc:HGNC:9369]	ENSG00000198056.15	PRIM1	5557	1.8	1.95	166	9.45e-26	2.46e-24	25
3	36826820	36945098	118279	-	ENSG00000168016	TRANK1	protein_coding	chromosome	tetratricopeptide repeat and ankyrin repeat containing 1 [Source:HGNC Symbol;Acc:HGNC:29011]	ENSG00000168016.14	TRANK1	9881	-2.28	6.78	166	9.58e-26	2.49e-24	25
2	96335766	96377091	41326	+	ENSG00000121152	NCAPH	protein_coding	chromosome	non-SMC condensin I complex subunit H [Source:HGNC Symbol;Acc:HGNC:1112]	ENSG00000121152.10	NCAPH	23397	2.61	3.48	166	9.66e-26	2.51e-24	25
14	77457870	77469472	11603	+	ENSG00000100591	AHSA1	protein_coding	chromosome	activator of HSP90 ATPase activity 1 [Source:HGNC Symbol;Acc:HGNC:1189]	ENSG00000100591.8	AHSA1	10598	0.92	6.05	166	9.76e-26	2.53e-24	25
20	33358839	33401561	42723	-	ENSG00000101391	CDK5RAP1	protein_coding	chromosome	CDK5 regulatory subunit associated protein 1 [Source:HGNC Symbol;Acc:HGNC:15880]	ENSG00000101391.21	CDK5RAP1	51654	1.24	4.6	166	9.88e-26	2.56e-24	25
CHR_HSCHR6_MHC_QBL_CTG1	33200834	33205337	4504	+	ENSG00000096150	RPS18	protein_coding	chromosome	ribosomal protein S18 [Source:HGNC Symbol;Acc:HGNC:10401]	ENSG00000096150.9	RPS18	6222	1.62	4.19	165	1.08e-25	2.8e-24	25
1	202193901	202319781	125881	+	ENSG00000133067	LGR6	protein_coding	chromosome	leucine rich repeat containing G protein-coupled receptor 6 [Source:HGNC Symbol;Acc:HGNC:19719]	ENSG00000133067.17	LGR6	59352	3.11	3.3	165	1.12e-25	2.88e-24	25
16	67159932	67164570	4639	+	ENSG00000135722	FBXL8	protein_coding	chromosome	F-box and leucine rich repeat protein 8 [Source:HGNC Symbol;Acc:HGNC:17875]	ENSG00000135722.9	FBXL8	55336	1.4	4.91	165	1.15e-25	2.95e-24	24.9
20	34704339	34713439	9101	+	ENSG00000078804	TP53INP2	protein_coding	chromosome	tumor protein p53 inducible nuclear protein 2 [Source:HGNC Symbol;Acc:HGNC:16104]	ENSG00000078804.13	TP53INP2	58476	-2.43	7.12	165	1.16e-25	2.98e-24	24.9
6	8073360	8102559	29200	-	ENSG00000124802	EEF1E1	protein_coding	chromosome	eukaryotic translation elongation factor 1 epsilon 1 [Source:HGNC Symbol;Acc:HGNC:3212]	ENSG00000124802.12	EEF1E1	9521	1.82	2.81	165	1.16e-25	2.97e-24	24.9
6	139371807	139374648	2842	-	ENSG00000164442	CITED2	protein_coding	chromosome	Cbp/p300 interacting transactivator with Glu/Asp rich carboxy-terminal domain 2 [Source:HGNC Symbol;Acc:HGNC:1987]	ENSG00000164442.10	CITED2	10370	-1.73	6.02	165	1.16e-25	2.97e-24	24.9
17	51165435	51171747	6313	+	ENSG00000243678	NME2	protein_coding	chromosome	NME/NM23 nucleoside diphosphate kinase 2 [Source:HGNC Symbol;Acc:HGNC:7850]	ENSG00000243678.11	NME2	4831	1.29	8.09	165	1.16e-25	2.97e-24	24.9
20	38748460	38772520	24061	+	ENSG00000101442	ACTR5	protein_coding	chromosome	actin related protein 5 [Source:HGNC Symbol;Acc:HGNC:14671]	ENSG00000101442.10	ACTR5	79913	1.14	3.59	165	1.17e-25	2.99e-24	24.9
6	38168451	38640148	471698	-	ENSG00000183826	BTBD9	protein_coding	chromosome	BTB domain containing 9 [Source:HGNC Symbol;Acc:HGNC:21228]	ENSG00000183826.18	BTBD9	114781	-1.27	4.69	165	1.23e-25	3.15e-24	24.9
15	65530418	65578349	47932	+	ENSG00000074696	HACD3	protein_coding	chromosome	3-hydroxyacyl-CoA dehydratase 3 [Source:HGNC Symbol;Acc:HGNC:24175]	ENSG00000074696.13	HACD3	51495	1.51	5.35	165	1.28e-25	3.26e-24	24.9
11	3826978	3840959	13982	-	ENSG00000177105	RHOG	protein_coding	chromosome	ras homolog family member G [Source:HGNC Symbol;Acc:HGNC:672]	ENSG00000177105.10	RHOG	391	-0.98	6.02	165	1.28e-25	3.26e-24	24.9
22	46576012	46679790	103779	+	ENSG00000075240	GRAMD4	protein_coding	chromosome	GRAM domain containing 4 [Source:HGNC Symbol;Acc:HGNC:29113]	ENSG00000075240.17	GRAMD4	23151	-1.52	6.93	164	1.3e-25	3.31e-24	24.9
12	6556863	6568691	11829	-	ENSG00000111641	NOP2	protein_coding	chromosome	NOP2 nucleolar protein [Source:HGNC Symbol;Acc:HGNC:7867]	ENSG00000111641.11	NOP2	4839	1.77	5.39	164	1.43e-25	3.61e-24	24.8
17	76389456	76453152	63697	-	ENSG00000175931	UBE2O	protein_coding	chromosome	ubiquitin conjugating enzyme E2 O [Source:HGNC Symbol;Acc:HGNC:29554]	ENSG00000175931.13	UBE2O	63893	1.02	5.01	164	1.43e-25	3.62e-24	24.8
9	134317098	134440585	123488	+	ENSG00000186350	RXRA	protein_coding	chromosome	retinoid X receptor alpha [Source:HGNC Symbol;Acc:HGNC:10477]	ENSG00000186350.12	RXRA	6256	-1.03	6.72	164	1.47e-25	3.73e-24	24.8
5	151437046	151492379	55334	+	ENSG00000123643	SLC36A1	protein_coding	chromosome	solute carrier family 36 member 1 [Source:HGNC Symbol;Acc:HGNC:18761]	ENSG00000123643.13	SLC36A1	206358	-2.19	6.12	164	1.48e-25	3.73e-24	24.8
19	13104902	13117567	12666	-	ENSG00000104907	TRMT1	protein_coding	chromosome	tRNA methyltransferase 1 [Source:HGNC Symbol;Acc:HGNC:25980]	ENSG00000104907.12	TRMT1	55621	1.51	5.82	164	1.49e-25	3.75e-24	24.8
6	110982015	111028263	46249	+	ENSG00000197498	RPF2	protein_coding	chromosome	ribosome production factor 2 homolog [Source:HGNC Symbol;Acc:HGNC:20870]	ENSG00000197498.13	RPF2	84154	1.71	3.71	164	1.5e-25	3.76e-24	24.8
4	17810979	17844865	33887	+	ENSG00000109805	NCAPG	protein_coding	chromosome	non-SMC condensin I complex subunit G [Source:HGNC Symbol;Acc:HGNC:24304]	ENSG00000109805.10	NCAPG	64151	2.36	3.4	164	1.52e-25	3.82e-24	24.8
X	136848004	136880764	32761	-	ENSG00000147274	RBMX	protein_coding	chromosome	RNA binding motif protein X-linked [Source:HGNC Symbol;Acc:HGNC:9910]	ENSG00000147274.14	RBMX	27316	0.979	6.61	164	1.53e-25	3.83e-24	24.8
16	67846923	67872567	25645	+	ENSG00000102898	NUTF2	protein_coding	chromosome	nuclear transport factor 2 [Source:HGNC Symbol;Acc:HGNC:13722]	ENSG00000102898.12	NUTF2	10204	0.904	5.83	164	1.54e-25	3.85e-24	24.8
2	234952017	235055714	103698	+	ENSG00000130147	SH3BP4	protein_coding	chromosome	SH3 domain binding protein 4 [Source:HGNC Symbol;Acc:HGNC:10826]	ENSG00000130147.16	SH3BP4	23677	1.61	5.28	164	1.58e-25	3.96e-24	24.8
3	48856926	48898904	41979	-	ENSG00000178537	SLC25A20	protein_coding	chromosome	solute carrier family 25 member 20 [Source:HGNC Symbol;Acc:HGNC:1421]	ENSG00000178537.10	SLC25A20	788	-1.56	4.9	164	1.61e-25	4.01e-24	24.8
3	172750682	172821474	70793	+	ENSG00000114346	ECT2	protein_coding	chromosome	epithelial cell transforming 2 [Source:HGNC Symbol;Acc:HGNC:3155]	ENSG00000114346.13	ECT2	1894	1.18	4.95	163	1.65e-25	4.12e-24	24.8
7	129434432	129488399	53968	+	ENSG00000128578	STRIP2	protein_coding	chromosome	striatin interacting protein 2 [Source:HGNC Symbol;Acc:HGNC:22209]	ENSG00000128578.10	STRIP2	57464	1.84	2.82	163	1.66e-25	4.13e-24	24.8
7	76397518	76442071	44554	+	ENSG00000188372	ZP3	protein_coding	chromosome	zona pellucida glycoprotein 3 [Source:HGNC Symbol;Acc:HGNC:13189]	ENSG00000188372.15	ZP3	7784	2.45	2.69	163	1.68e-25	4.19e-24	24.8
12	118032694	118062430	29737	-	ENSG00000176871	WSB2	protein_coding	chromosome	WD repeat and SOCS box containing 2 [Source:HGNC Symbol;Acc:HGNC:19222]	ENSG00000176871.8	WSB2	55884	-1.03	6.15	163	1.77e-25	4.38e-24	24.8
22	37010859	37020183	9325	-	ENSG00000128311	TST	protein_coding	chromosome	thiosulfate sulfurtransferase [Source:HGNC Symbol;Acc:HGNC:12388]	ENSG00000128311.14	TST	7263	-1.79	8.14	163	1.82e-25	4.5e-24	24.7
1	212363931	212414901	50971	-	ENSG00000065600	PACC1	protein_coding	chromosome	proton activated chloride channel 1 [Source:HGNC Symbol;Acc:HGNC:25593]	ENSG00000065600.12	PACC1	55248	1.71	2.16	163	1.83e-25	4.52e-24	24.7
14	21498133	21511342	13210	-	ENSG00000165819	METTL3	protein_coding	chromosome	methyltransferase like 3 [Source:HGNC Symbol;Acc:HGNC:17563]	ENSG00000165819.12	METTL3	56339	0.936	5.13	163	1.83e-25	4.52e-24	24.7
19	43525497	43536130	10634	+	ENSG00000176472	ZNF575	protein_coding	chromosome	zinc finger protein 575 [Source:HGNC Symbol;Acc:HGNC:27606]	ENSG00000176472.10	ZNF575	284346	-2.23	3.81	163	1.83e-25	4.53e-24	24.7
5	146113034	146182650	69617	-	ENSG00000133706	LARS	protein_coding	chromosome	leucyl-tRNA synthetase [Source:HGNC Symbol;Acc:HGNC:6512]	ENSG00000133706.18	LARS	51520	1.02	5.77	163	1.84e-25	4.53e-24	24.7
4	173331376	173334432	3057	-	ENSG00000164104	HMGB2	protein_coding	chromosome	high mobility group box 2 [Source:HGNC Symbol;Acc:HGNC:5000]	ENSG00000164104.12	HMGB2	3148	1.43	6.2	163	1.86e-25	4.57e-24	24.7
17	8204733	8210600	5868	-	ENSG00000178999	AURKB	protein_coding	chromosome	aurora kinase B [Source:HGNC Symbol;Acc:HGNC:11390]	ENSG00000178999.13	AURKB	9212	2.2	4.01	163	1.86e-25	4.57e-24	24.7
12	124946825	124989131	42307	-	ENSG00000150990	DHX37	protein_coding	chromosome	DEAH-box helicase 37 [Source:HGNC Symbol;Acc:HGNC:17210]	ENSG00000150990.8	DHX37	57647	1.12	4.92	163	1.88e-25	4.6e-24	24.7
8	42152946	42171673	18728	+	ENSG00000070718	AP3M2	protein_coding	chromosome	adaptor related protein complex 3 subunit mu 2 [Source:HGNC Symbol;Acc:HGNC:570]	ENSG00000070718.12	AP3M2	10947	1.67	3.63	163	1.89e-25	4.64e-24	24.7
14	20455191	20457772	2582	+	ENSG00000100823	APEX1	protein_coding	chromosome	apurinic/apyrimidinic endodeoxyribonuclease 1 [Source:HGNC Symbol;Acc:HGNC:587]	ENSG00000100823.12	APEX1	328	1.35	6.42	163	1.9e-25	4.65e-24	24.7
8	74234700	74321540	86841	-	ENSG00000104369	JPH1	protein_coding	chromosome	junctophilin 1 [Source:HGNC Symbol;Acc:HGNC:14201]	ENSG00000104369.5	JPH1	56704	2.18	4.11	163	1.93e-25	4.71e-24	24.7
18	61808067	61894247	86181	-	ENSG00000176641	RNF152	protein_coding	chromosome	ring finger protein 152 [Source:HGNC Symbol;Acc:HGNC:26811]	ENSG00000176641.11	RNF152	220441	-2.74	4.83	163	1.93e-25	4.71e-24	24.7
11	61392360	61398863	6504	+	ENSG00000187049	TMEM216	protein_coding	chromosome	transmembrane protein 216 [Source:HGNC Symbol;Acc:HGNC:25018]	ENSG00000187049.10	TMEM216	51259	1.02	3.04	163	1.95e-25	4.74e-24	24.7
16	75627474	75648643	21170	-	ENSG00000065427	KARS	protein_coding	chromosome	lysyl-tRNA synthetase [Source:HGNC Symbol;Acc:HGNC:6215]	ENSG00000065427.14	KARS	3735	0.922	6.53	163	1.98e-25	4.82e-24	24.7
7	141738334	141787922	49589	+	ENSG00000106028	SSBP1	protein_coding	chromosome	single stranded DNA binding protein 1 [Source:HGNC Symbol;Acc:HGNC:11317]	ENSG00000106028.11	SSBP1	6742	1.14	4.57	163	1.99e-25	4.82e-24	24.7
1	205434885	205457091	22207	-	ENSG00000281406	BLACAT1	protein_coding	chromosome	bladder cancer associated transcript 1 [Source:HGNC Symbol;Acc:HGNC:48597]	ENSG00000281406.2	BLACAT1	NA	4.2	2.61	163	1.99e-25	4.82e-24	24.7
17	51260546	51297936	37391	+	ENSG00000011260	UTP18	protein_coding	chromosome	UTP18 small subunit processome component [Source:HGNC Symbol;Acc:HGNC:24274]	ENSG00000011260.14	UTP18	51096	1.21	4.26	163	2.02e-25	4.89e-24	24.7
19	18153163	18170532	17370	+	ENSG00000105647	PIK3R2	protein_coding	chromosome	phosphoinositide-3-kinase regulatory subunit 2 [Source:HGNC Symbol;Acc:HGNC:8980]	ENSG00000105647.18	PIK3R2	5296	1.06	6.07	162	2.19e-25	5.28e-24	24.7
5	128083766	128189677	105912	+	ENSG00000064651	SLC12A2	protein_coding	chromosome	solute carrier family 12 member 2 [Source:HGNC Symbol;Acc:HGNC:10911]	ENSG00000064651.14	SLC12A2	6558	2.55	7.19	162	2.23e-25	5.38e-24	24.7
15	40217428	40277487	60060	+	ENSG00000137843	PAK6	protein_coding	chromosome	p21 (RAC1) activated kinase 6 [Source:HGNC Symbol;Acc:HGNC:16061]	ENSG00000137843.12	PAK6	56924	2.04	2.27	162	2.24e-25	5.4e-24	24.6
21	33266367	33310187	43821	+	ENSG00000243646	IL10RB	protein_coding	chromosome	interleukin 10 receptor subunit beta [Source:HGNC Symbol;Acc:HGNC:5965]	ENSG00000243646.10	IL10RB	3588	-1.58	6.09	162	2.29e-25	5.52e-24	24.6
9	37120539	37358149	237611	+	ENSG00000147905	ZCCHC7	protein_coding	chromosome	zinc finger CCHC-type containing 7 [Source:HGNC Symbol;Acc:HGNC:26209]	ENSG00000147905.17	ZCCHC7	84186	0.987	3.77	162	2.31e-25	5.55e-24	24.6
2	233865437	233868444	3008	-	ENSG00000224287	MSL3P1	transcribed_processed_pseudogene	chromosome	MSL complex subunit 3 pseudogene 1 [Source:HGNC Symbol;Acc:HGNC:17837]	ENSG00000224287.2	MSL3P1	NA	1.99	1.66	162	2.31e-25	5.55e-24	24.6
8	116642130	116766925	124796	-	ENSG00000147677	EIF3H	protein_coding	chromosome	eukaryotic translation initiation factor 3 subunit H [Source:HGNC Symbol;Acc:HGNC:3273]	ENSG00000147677.11	EIF3H	8667	1.16	6.98	162	2.34e-25	5.62e-24	24.6
14	24180219	24188869	8651	-	ENSG00000196497	IPO4	protein_coding	chromosome	importin 4 [Source:HGNC Symbol;Acc:HGNC:19426]	ENSG00000196497.17	IPO4	79711	1.78	5.01	162	2.38e-25	5.7e-24	24.6
16	23522014	23557731	35718	-	ENSG00000103356	EARS2	protein_coding	chromosome	glutamyl-tRNA synthetase 2, mitochondrial [Source:HGNC Symbol;Acc:HGNC:29419]	ENSG00000103356.15	EARS2	124454	1.53	4.16	162	2.44e-25	5.82e-24	24.6
16	29900375	29919864	19490	+	ENSG00000174939	ASPHD1	protein_coding	chromosome	aspartate beta-hydroxylase domain containing 1 [Source:HGNC Symbol;Acc:HGNC:27380]	ENSG00000174939.11	ASPHD1	253982	3.14	2.94	162	2.47e-25	5.89e-24	24.6
12	64186316	64222296	35981	-	ENSG00000174206	C12orf66	protein_coding	chromosome	chromosome 12 open reading frame 66 [Source:HGNC Symbol;Acc:HGNC:26517]	ENSG00000174206.12	C12orf66	144577	1.53	2	162	2.5e-25	5.96e-24	24.6
22	31325804	31346346	20543	-	ENSG00000100105	PATZ1	protein_coding	chromosome	POZ/BTB and AT hook containing zinc finger 1 [Source:HGNC Symbol;Acc:HGNC:13071]	ENSG00000100105.18	PATZ1	23598	1.38	4.65	162	2.52e-25	6e-24	24.6
4	1692731	1712344	19614	-	ENSG00000163950	SLBP	protein_coding	chromosome	stem-loop binding protein [Source:HGNC Symbol;Acc:HGNC:10904]	ENSG00000163950.13	SLBP	7884	1.08	4.89	162	2.61e-25	6.19e-24	24.6
CHR_HG926_PATCH	21992621	22075070	82450	-	ENSG00000284161	EEF2K	protein_coding	chromosome	eukaryotic elongation factor 2 kinase [Source:HGNC Symbol;Acc:HGNC:24615]	ENSG00000284161.3	EEF2K	29904	-1.41	5.65	161	2.65e-25	6.29e-24	24.6
5	138285265	138338355	53091	-	ENSG00000158402	CDC25C	protein_coding	chromosome	cell division cycle 25C [Source:HGNC Symbol;Acc:HGNC:1727]	ENSG00000158402.20	CDC25C	995	2.34	1.81	161	2.68e-25	6.34e-24	24.6
2	119429901	119438504	8604	+	ENSG00000171227	TMEM37	protein_coding	chromosome	transmembrane protein 37 [Source:HGNC Symbol;Acc:HGNC:18216]	ENSG00000171227.7	TMEM37	140738	-2.75	6.6	161	2.69e-25	6.35e-24	24.6
5	150601080	150659207	58128	+	ENSG00000171992	SYNPO	protein_coding	chromosome	synaptopodin [Source:HGNC Symbol;Acc:HGNC:30672]	ENSG00000171992.13	SYNPO	11346	-1.68	6.74	161	2.73e-25	6.45e-24	24.6
15	44537125	44563029	25905	+	ENSG00000104131	EIF3J	protein_coding	chromosome	eukaryotic translation initiation factor 3 subunit J [Source:HGNC Symbol;Acc:HGNC:3270]	ENSG00000104131.13	EIF3J	8669	1.04	5.24	161	2.74e-25	6.47e-24	24.6
17	29589769	29614761	24993	+	ENSG00000198720	ANKRD13B	protein_coding	chromosome	ankyrin repeat domain 13B [Source:HGNC Symbol;Acc:HGNC:26363]	ENSG00000198720.13	ANKRD13B	124930	2.71	4.13	161	2.79e-25	6.57e-24	24.6
16	66844414	66854153	9740	+	ENSG00000168748	CA7	protein_coding	chromosome	carbonic anhydrase 7 [Source:HGNC Symbol;Acc:HGNC:1381]	ENSG00000168748.14	CA7	766	-4.63	7.02	161	2.83e-25	6.65e-24	24.5
7	92604921	92836594	231674	-	ENSG00000105810	CDK6	protein_coding	chromosome	cyclin dependent kinase 6 [Source:HGNC Symbol;Acc:HGNC:1777]	ENSG00000105810.9	CDK6	1021	1.55	4.53	161	2.84e-25	6.66e-24	24.5
1	156594487	156601496	7010	-	ENSG00000160818	GPATCH4	protein_coding	chromosome	G-patch domain containing 4 [Source:HGNC Symbol;Acc:HGNC:25982]	ENSG00000160818.16	GPATCH4	54865	1.38	4.68	161	2.84e-25	6.66e-24	24.5
3	142964497	143060725	96229	+	ENSG00000163714	U2SURP	protein_coding	chromosome	U2 snRNP associated SURP domain containing [Source:HGNC Symbol;Acc:HGNC:30855]	ENSG00000163714.18	U2SURP	23350	1.06	5.77	161	2.95e-25	6.91e-24	24.5
3	38007496	38029762	22267	-	ENSG00000187091	PLCD1	protein_coding	chromosome	phospholipase C delta 1 [Source:HGNC Symbol;Acc:HGNC:9060]	ENSG00000187091.13	PLCD1	5333	-2.39	6.29	161	2.98e-25	6.97e-24	24.5
19	43506719	43527230	20512	-	ENSG00000105755	ETHE1	protein_coding	chromosome	ETHE1 persulfide dioxygenase [Source:HGNC Symbol;Acc:HGNC:23287]	ENSG00000105755.8	ETHE1	23474	-1.95	8.07	161	2.99e-25	6.98e-24	24.5
6	35832966	35921342	88377	-	ENSG00000096063	SRPK1	protein_coding	chromosome	SRSF protein kinase 1 [Source:HGNC Symbol;Acc:HGNC:11305]	ENSG00000096063.16	SRPK1	6732	1.31	6.07	161	3.02e-25	7.05e-24	24.5
4	145098288	145129524	31237	+	ENSG00000164163	ABCE1	protein_coding	chromosome	ATP binding cassette subfamily E member 1 [Source:HGNC Symbol;Acc:HGNC:69]	ENSG00000164163.11	ABCE1	6059	1.68	4.84	161	3.03e-25	7.05e-24	24.5
12	2876258	2889524	13267	+	ENSG00000171792	RHNO1	protein_coding	chromosome	RAD9-HUS1-RAD1 interacting nuclear orphan 1 [Source:HGNC Symbol;Acc:HGNC:28206]	ENSG00000171792.11	RHNO1	83695	1.29	3.73	161	3.06e-25	7.1e-24	24.5
4	127880893	127899224	18332	+	ENSG00000142731	PLK4	protein_coding	chromosome	polo like kinase 4 [Source:HGNC Symbol;Acc:HGNC:11397]	ENSG00000142731.11	PLK4	10733	2.14	2.63	161	3.18e-25	7.39e-24	24.5
9	128947699	129007096	59398	+	ENSG00000095319	NUP188	protein_coding	chromosome	nucleoporin 188 [Source:HGNC Symbol;Acc:HGNC:17859]	ENSG00000095319.14	NUP188	23511	1.12	5.41	161	3.21e-25	7.44e-24	24.5
12	57762334	57768986	6653	-	ENSG00000111012	CYP27B1	protein_coding	chromosome	cytochrome P450 family 27 subfamily B member 1 [Source:HGNC Symbol;Acc:HGNC:2606]	ENSG00000111012.10	CYP27B1	1594	2.08	1.42	161	3.22e-25	7.44e-24	24.5
13	113584721	113641473	56753	+	ENSG00000198176	TFDP1	protein_coding	chromosome	transcription factor Dp-1 [Source:HGNC Symbol;Acc:HGNC:11749]	ENSG00000198176.13	TFDP1	7027	1.13	6.07	161	3.22e-25	7.44e-24	24.5
1	39838110	39883511	45402	-	ENSG00000043514	TRIT1	protein_coding	chromosome	tRNA isopentenyltransferase 1 [Source:HGNC Symbol;Acc:HGNC:20286]	ENSG00000043514.17	TRIT1	54802	1.09	3.54	161	3.28e-25	7.57e-24	24.5
2	218710835	218755416	44582	+	ENSG00000135912	TTLL4	protein_coding	chromosome	tubulin tyrosine ligase like 4 [Source:HGNC Symbol;Acc:HGNC:28976]	ENSG00000135912.11	TTLL4	9654	1.43	4.49	161	3.29e-25	7.58e-24	24.5
2	130151392	130182750	31359	-	ENSG00000136699	SMPD4	protein_coding	chromosome	sphingomyelin phosphodiesterase 4 [Source:HGNC Symbol;Acc:HGNC:32949]	ENSG00000136699.19	SMPD4	55627	1.11	6.38	160	3.38e-25	7.78e-24	24.5
17	40388525	40417896	29372	-	ENSG00000131747	TOP2A	protein_coding	chromosome	DNA topoisomerase II alpha [Source:HGNC Symbol;Acc:HGNC:11989]	ENSG00000131747.15	TOP2A	7153	2.63	5.74	160	3.42e-25	7.86e-24	24.5
1	10456522	10472529	16008	-	ENSG00000160049	DFFA	protein_coding	chromosome	DNA fragmentation factor subunit alpha [Source:HGNC Symbol;Acc:HGNC:2772]	ENSG00000160049.12	DFFA	1676	1.04	4.86	160	3.43e-25	7.87e-24	24.5
15	41309273	41332591	23319	-	ENSG00000104147	OIP5	protein_coding	chromosome	Opa interacting protein 5 [Source:HGNC Symbol;Acc:HGNC:20300]	ENSG00000104147.9	OIP5	11339	2.44	1.85	160	3.5e-25	8.01e-24	24.5
5	612340	667168	54829	+	ENSG00000112877	CEP72	protein_coding	chromosome	centrosomal protein 72 [Source:HGNC Symbol;Acc:HGNC:25547]	ENSG00000112877.8	CEP72	55722	2.21	2.67	160	3.51e-25	8.02e-24	24.5
15	71164770	71165415	646	-	ENSG00000259781	HMGB1P6	processed_pseudogene	chromosome	high mobility group box 1 pseudogene 6 [Source:HGNC Symbol;Acc:HGNC:4998]	ENSG00000259781.1	HMGB1P6	NA	1.28	5.44	160	3.53e-25	8.08e-24	24.5
19	43766533	43781257	14725	-	ENSG00000104783	KCNN4	protein_coding	chromosome	potassium calcium-activated channel subfamily N member 4 [Source:HGNC Symbol;Acc:HGNC:6293]	ENSG00000104783.14	KCNN4	3783	2.19	6.15	160	3.56e-25	8.12e-24	24.4
12	57782761	57808071	25311	+	ENSG00000123297	TSFM	protein_coding	chromosome	Ts translation elongation factor, mitochondrial [Source:HGNC Symbol;Acc:HGNC:12367]	ENSG00000123297.19	TSFM	10102	1.25	4.18	160	3.58e-25	8.14e-24	24.4
3	50292831	50299405	6575	-	ENSG00000186792	HYAL3	protein_coding	chromosome	hyaluronidase 3 [Source:HGNC Symbol;Acc:HGNC:5322]	ENSG00000186792.17	HYAL3	8372	1.8	2.16	160	3.58e-25	8.14e-24	24.4
22	24540423	24555935	15513	-	ENSG00000138867	GUCD1	protein_coding	chromosome	guanylyl cyclase domain containing 1 [Source:HGNC Symbol;Acc:HGNC:14237]	ENSG00000138867.16	GUCD1	83606	-1.06	7	160	3.77e-25	8.57e-24	24.4
19	2321520	2328611	7092	-	ENSG00000130332	LSM7	protein_coding	chromosome	LSM7 homolog, U6 small nuclear RNA and mRNA degradation associated [Source:HGNC Symbol;Acc:HGNC:20470]	ENSG00000130332.15	LSM7	51690	1.01	6.06	160	4.02e-25	9.12e-24	24.4
19	10543895	10553418	9524	+	ENSG00000130734	ATG4D	protein_coding	chromosome	autophagy related 4D cysteine peptidase [Source:HGNC Symbol;Acc:HGNC:20789]	ENSG00000130734.10	ATG4D	84971	-1.44	6.15	160	4.05e-25	9.18e-24	24.4
20	35771974	35950370	178397	+	ENSG00000025293	PHF20	protein_coding	chromosome	PHD finger protein 20 [Source:HGNC Symbol;Acc:HGNC:16098]	ENSG00000025293.17	PHF20	51230	1.17	4.73	160	4.17e-25	9.43e-24	24.4
20	64255695	64287821	32127	+	ENSG00000203880	PCMTD2	protein_coding	chromosome	protein-L-isoaspartate (D-aspartate) O-methyltransferase domain containing 2 [Source:HGNC Symbol;Acc:HGNC:15882]	ENSG00000203880.12	PCMTD2	55251	1.25	4.9	160	4.18e-25	9.44e-24	24.4
8	123416726	123470028	53303	+	ENSG00000156795	WDYHV1	protein_coding	chromosome	WDYHV motif containing 1 [Source:HGNC Symbol;Acc:HGNC:25490]	ENSG00000156795.8	WDYHV1	55093	1.56	2.51	160	4.2e-25	9.48e-24	24.4
2	3575260	3580920	5661	+	ENSG00000171863	RPS7	protein_coding	chromosome	ribosomal protein S7 [Source:HGNC Symbol;Acc:HGNC:10440]	ENSG00000171863.15	RPS7	6201	1.23	8.87	160	4.21e-25	9.49e-24	24.4
X	129645259	129654956	9698	-	ENSG00000171388	APLN	protein_coding	chromosome	apelin [Source:HGNC Symbol;Acc:HGNC:16665]	ENSG00000171388.12	APLN	8862	3.75	2.25	159	4.32e-25	9.72e-24	24.4
4	88090150	88231628	141479	-	ENSG00000118777	ABCG2	protein_coding	chromosome	ATP binding cassette subfamily G member 2 (Junior blood group) [Source:HGNC Symbol;Acc:HGNC:74]	ENSG00000118777.12	ABCG2	9429	-3.92	5.27	159	4.38e-25	9.85e-24	24.4
2	86106223	86142157	35935	+	ENSG00000132300	PTCD3	protein_coding	chromosome	pentatricopeptide repeat domain 3 [Source:HGNC Symbol;Acc:HGNC:24717]	ENSG00000132300.19	PTCD3	55037	1.03	5.72	159	4.41e-25	9.9e-24	24.4
6	43076307	43161719	85413	+	ENSG00000112655	PTK7	protein_coding	chromosome	protein tyrosine kinase 7 (inactive) [Source:HGNC Symbol;Acc:HGNC:9618]	ENSG00000112655.16	PTK7	5754	2.4	5.35	159	4.44e-25	9.94e-24	24.4
13	20777329	20903048	125720	-	ENSG00000132953	XPO4	protein_coding	chromosome	exportin 4 [Source:HGNC Symbol;Acc:HGNC:17796]	ENSG00000132953.16	XPO4	64328	1.64	4.33	159	4.49e-25	1e-23	24.3
6	56457987	56954649	496663	-	ENSG00000151914	DST	protein_coding	chromosome	dystonin [Source:HGNC Symbol;Acc:HGNC:1090]	ENSG00000151914.20	DST	667	-1.41	7.79	159	4.58e-25	1.02e-23	24.3
18	49560699	49599185	38487	+	ENSG00000101670	LIPG	protein_coding	chromosome	lipase G, endothelial type [Source:HGNC Symbol;Acc:HGNC:6623]	ENSG00000101670.12	LIPG	9388	2.39	4.76	159	4.65e-25	1.04e-23	24.3
22	30607003	30627271	20269	+	ENSG00000185339	TCN2	protein_coding	chromosome	transcobalamin 2 [Source:HGNC Symbol;Acc:HGNC:11653]	ENSG00000185339.9	TCN2	6948	-2.1	5.35	159	4.72e-25	1.05e-23	24.3
12	121209857	121234106	24250	+	ENSG00000135124	P2RX4	protein_coding	chromosome	purinergic receptor P2X 4 [Source:HGNC Symbol;Acc:HGNC:8535]	ENSG00000135124.14	P2RX4	5025	-1.82	6.85	159	4.78e-25	1.06e-23	24.3
X	17737449	17754988	17540	+	ENSG00000047634	SCML1	protein_coding	chromosome	Scm polycomb group protein like 1 [Source:HGNC Symbol;Acc:HGNC:10580]	ENSG00000047634.15	SCML1	6322	1.74	4.22	159	4.8e-25	1.07e-23	24.3
2	10570754	10689987	119234	-	ENSG00000115761	NOL10	protein_coding	chromosome	nucleolar protein 10 [Source:HGNC Symbol;Acc:HGNC:25862]	ENSG00000115761.16	NOL10	79954	0.986	4.21	159	4.8e-25	1.07e-23	24.3
1	102876467	103108872	232406	-	ENSG00000060718	COL11A1	protein_coding	chromosome	collagen type XI alpha 1 chain [Source:HGNC Symbol;Acc:HGNC:2186]	ENSG00000060718.22	COL11A1	1301	4.79	2.92	159	4.81e-25	1.07e-23	24.3
17	28553383	28571794	18412	-	ENSG00000087111	PIGS	protein_coding	chromosome	phosphatidylinositol glycan anchor biosynthesis class S [Source:HGNC Symbol;Acc:HGNC:14937]	ENSG00000087111.21	PIGS	94005	-1.12	6.02	159	4.82e-25	1.07e-23	24.3
7	21900899	21945903	45005	-	ENSG00000164649	CDCA7L	protein_coding	chromosome	cell division cycle associated 7 like [Source:HGNC Symbol;Acc:HGNC:30777]	ENSG00000164649.20	CDCA7L	55536	1.58	4.32	159	5.01e-25	1.11e-23	24.3
12	103940763	103965708	24946	-	ENSG00000204954	C12orf73	protein_coding	chromosome	chromosome 12 open reading frame 73 [Source:HGNC Symbol;Acc:HGNC:34450]	ENSG00000204954.10	C12orf73	728568	1.3	2.08	159	5.02e-25	1.11e-23	24.3
1	66924895	66988619	63725	+	ENSG00000198160	MIER1	protein_coding	chromosome	MIER1 transcriptional regulator [Source:HGNC Symbol;Acc:HGNC:29657]	ENSG00000198160.14	MIER1	57708	-1.25	5.11	159	5.06e-25	1.11e-23	24.3
3	53156009	53192717	36709	+	ENSG00000163932	PRKCD	protein_coding	chromosome	protein kinase C delta [Source:HGNC Symbol;Acc:HGNC:9399]	ENSG00000163932.15	PRKCD	5580	-1.2	6.98	159	5.13e-25	1.13e-23	24.3
2	231453531	231483641	30111	-	ENSG00000115053	NCL	protein_coding	chromosome	nucleolin [Source:HGNC Symbol;Acc:HGNC:7667]	ENSG00000115053.16	NCL	4691	1.38	8.4	159	5.26e-25	1.16e-23	24.3
1	31259568	31296788	37221	-	ENSG00000060688	SNRNP40	protein_coding	chromosome	small nuclear ribonucleoprotein U5 subunit 40 [Source:HGNC Symbol;Acc:HGNC:30857]	ENSG00000060688.13	SNRNP40	9410	0.993	4.36	159	5.31e-25	1.16e-23	24.3
14	54938949	55027105	88157	-	ENSG00000198554	WDHD1	protein_coding	chromosome	WD repeat and HMG-box DNA binding protein 1 [Source:HGNC Symbol;Acc:HGNC:23170]	ENSG00000198554.12	WDHD1	11169	2.14	2.63	159	5.31e-25	1.16e-23	24.3
3	120324509	120349354	24846	-	ENSG00000163428	LRRC58	protein_coding	chromosome	leucine rich repeat containing 58 [Source:HGNC Symbol;Acc:HGNC:26968]	ENSG00000163428.4	LRRC58	116064	0.807	4.75	158	5.38e-25	1.18e-23	24.3
12	53500921	53506431	5511	+	ENSG00000139546	TARBP2	protein_coding	chromosome	TARBP2 subunit of RISC loading complex [Source:HGNC Symbol;Acc:HGNC:11569]	ENSG00000139546.11	TARBP2	6895	0.959	4.46	158	5.41e-25	1.18e-23	24.3
18	9914002	9960021	46020	+	ENSG00000101558	VAPA	protein_coding	chromosome	VAMP associated protein A [Source:HGNC Symbol;Acc:HGNC:12648]	ENSG00000101558.13	VAPA	9218	-1.34	6.89	158	5.45e-25	1.19e-23	24.3
5	132369752	132395614	25863	+	ENSG00000197375	SLC22A5	protein_coding	chromosome	solute carrier family 22 member 5 [Source:HGNC Symbol;Acc:HGNC:10969]	ENSG00000197375.12	SLC22A5	6584	-1.94	6.01	158	5.46e-25	1.19e-23	24.3
2	219538948	219543809	4862	-	ENSG00000123989	CHPF	protein_coding	chromosome	chondroitin polymerizing factor [Source:HGNC Symbol;Acc:HGNC:24291]	ENSG00000123989.14	CHPF	79586	1.37	6.58	158	5.5e-25	1.2e-23	24.3
20	51782331	51802521	20191	-	ENSG00000101115	SALL4	protein_coding	chromosome	spalt like transcription factor 4 [Source:HGNC Symbol;Acc:HGNC:15924]	ENSG00000101115.13	SALL4	57167	3.31	2.36	158	5.51e-25	1.2e-23	24.3
9	20658309	20995955	337647	+	ENSG00000188352	FOCAD	protein_coding	chromosome	focadhesin [Source:HGNC Symbol;Acc:HGNC:23377]	ENSG00000188352.12	FOCAD	54914	1.06	4.61	158	5.55e-25	1.21e-23	24.3
4	82430590	82461177	30588	+	ENSG00000145293	ENOPH1	protein_coding	chromosome	enolase-phosphatase 1 [Source:HGNC Symbol;Acc:HGNC:24599]	ENSG00000145293.16	ENOPH1	58478	1.32	4.22	158	5.61e-25	1.22e-23	24.3
11	74454841	74467729	12889	-	ENSG00000175538	KCNE3	protein_coding	chromosome	potassium voltage-gated channel subfamily E regulatory subunit 3 [Source:HGNC Symbol;Acc:HGNC:6243]	ENSG00000175538.10	KCNE3	10008	2.07	5.09	158	6.2e-25	1.34e-23	24.2
21	32592079	32612603	20525	-	ENSG00000159079	CFAP298	protein_coding	chromosome	cilia and flagella associated protein 298 [Source:HGNC Symbol;Acc:HGNC:1301]	ENSG00000159079.19	CFAP298	56683	1.06	5.07	158	6.26e-25	1.35e-23	24.2
12	48147789	48181213	33425	-	ENSG00000177981	ASB8	protein_coding	chromosome	ankyrin repeat and SOCS box containing 8 [Source:HGNC Symbol;Acc:HGNC:17183]	ENSG00000177981.11	ASB8	140461	-0.841	4.41	158	6.34e-25	1.37e-23	24.2
6	35342558	35428191	85634	+	ENSG00000112033	PPARD	protein_coding	chromosome	peroxisome proliferator activated receptor delta [Source:HGNC Symbol;Acc:HGNC:9235]	ENSG00000112033.14	PPARD	5467	-1.56	7	158	6.39e-25	1.38e-23	24.2
12	122527246	122626396	99151	+	ENSG00000184445	KNTC1	protein_coding	chromosome	kinetochore associated 1 [Source:HGNC Symbol;Acc:HGNC:17255]	ENSG00000184445.12	KNTC1	9735	1.47	4.59	158	6.5e-25	1.4e-23	24.2
5	177402140	177409576	7437	-	ENSG00000131187	F12	protein_coding	chromosome	coagulation factor XII [Source:HGNC Symbol;Acc:HGNC:3530]	ENSG00000131187.9	F12	2161	2.08	3.55	158	6.68e-25	1.44e-23	24.2
17	48611377	48615292	3916	-	ENSG00000120068	HOXB8	protein_coding	chromosome	homeobox B8 [Source:HGNC Symbol;Acc:HGNC:5119]	ENSG00000120068.7	HOXB8	3218	3	4.94	157	6.86e-25	1.48e-23	24.2
19	49675786	49689029	13244	+	ENSG00000126457	PRMT1	protein_coding	chromosome	protein arginine methyltransferase 1 [Source:HGNC Symbol;Acc:HGNC:5187]	ENSG00000126457.21	PRMT1	3276	1.46	6.73	157	7.02e-25	1.51e-23	24.2
9	95099054	95426796	327743	-	ENSG00000158169	FANCC	protein_coding	chromosome	FA complementation group C [Source:HGNC Symbol;Acc:HGNC:3584]	ENSG00000158169.13	FANCC	2176	0.931	3.7	157	7.08e-25	1.52e-23	24.2
11	93729948	93784391	54444	-	ENSG00000166012	TAF1D	protein_coding	chromosome	TATA-box binding protein associated factor, RNA polymerase I subunit D [Source:HGNC Symbol;Acc:HGNC:28759]	ENSG00000166012.17	TAF1D	79101	1.33	5.94	157	7.23e-25	1.55e-23	24.1
5	171387116	171411137	24022	+	ENSG00000181163	NPM1	protein_coding	chromosome	nucleophosmin 1 [Source:HGNC Symbol;Acc:HGNC:7910]	ENSG00000181163.13	NPM1	4869	1.64	8.13	157	7.35e-25	1.57e-23	24.1
22	46296870	46330810	33941	+	ENSG00000075218	GTSE1	protein_coding	chromosome	G2 and S-phase expressed 1 [Source:HGNC Symbol;Acc:HGNC:13698]	ENSG00000075218.19	GTSE1	51512	2.14	3.7	157	7.36e-25	1.57e-23	24.1
20	3046052	3048250	2199	+	ENSG00000125901	MRPS26	protein_coding	chromosome	mitochondrial ribosomal protein S26 [Source:HGNC Symbol;Acc:HGNC:14045]	ENSG00000125901.6	MRPS26	64949	1.38	5.31	157	7.37e-25	1.57e-23	24.1
7	32485338	32495283	9946	-	ENSG00000106355	LSM5	protein_coding	chromosome	LSM5 homolog, U6 small nuclear RNA and mRNA degradation associated [Source:HGNC Symbol;Acc:HGNC:17162]	ENSG00000106355.10	LSM5	23658	1.42	3.95	157	7.4e-25	1.58e-23	24.1
19	7492976	7508450	15475	+	ENSG00000198723	TEX45	protein_coding	chromosome	testis expressed 45 [Source:HGNC Symbol;Acc:HGNC:24745]	ENSG00000198723.11	TEX45	374877	2.62	1.45	157	7.45e-25	1.58e-23	24.1
1	150487364	150507609	20246	+	ENSG00000143374	TARS2	protein_coding	chromosome	threonyl-tRNA synthetase 2, mitochondrial [Source:HGNC Symbol;Acc:HGNC:30740]	ENSG00000143374.17	TARS2	80222	1.02	4.49	157	7.49e-25	1.59e-23	24.1
22	38685543	38701556	16014	-	ENSG00000100221	JOSD1	protein_coding	chromosome	Josephin domain containing 1 [Source:HGNC Symbol;Acc:HGNC:28953]	ENSG00000100221.10	JOSD1	9929	-1.22	6.85	157	7.56e-25	1.6e-23	24.1
16	46407	53608	7202	-	ENSG00000161980	POLR3K	protein_coding	chromosome	RNA polymerase III subunit K [Source:HGNC Symbol;Acc:HGNC:14121]	ENSG00000161980.6	POLR3K	51728	1.06	3.68	157	7.56e-25	1.6e-23	24.1
1	197084127	197146694	62568	-	ENSG00000066279	ASPM	protein_coding	chromosome	abnormal spindle microtubule assembly [Source:HGNC Symbol;Acc:HGNC:19048]	ENSG00000066279.18	ASPM	259266	2.61	3.47	157	7.89e-25	1.67e-23	24.1
8	96261902	96336995	75094	+	ENSG00000156471	PTDSS1	protein_coding	chromosome	phosphatidylserine synthase 1 [Source:HGNC Symbol;Acc:HGNC:9587]	ENSG00000156471.13	PTDSS1	9791	1.47	5.61	157	7.96e-25	1.68e-23	24.1
19	49906825	49929763	22939	-	ENSG00000213024	NUP62	protein_coding	chromosome	nucleoporin 62 [Source:HGNC Symbol;Acc:HGNC:8066]	ENSG00000213024.11	NUP62	23636	0.814	6.1	157	8.16e-25	1.72e-23	24.1
X	64185117	64205708	20592	-	ENSG00000184675	AMER1	protein_coding	chromosome	APC membrane recruitment protein 1 [Source:HGNC Symbol;Acc:HGNC:26837]	ENSG00000184675.11	AMER1	139285	1.58	2.94	157	8.29e-25	1.75e-23	24.1
1	245749342	246507312	757971	-	ENSG00000185420	SMYD3	protein_coding	chromosome	SET and MYND domain containing 3 [Source:HGNC Symbol;Acc:HGNC:15513]	ENSG00000185420.19	SMYD3	64754	1.18	2.88	157	8.32e-25	1.75e-23	24.1
7	73302516	73308826	6311	-	ENSG00000130305	NSUN5	protein_coding	chromosome	NOP2/Sun RNA methyltransferase 5 [Source:HGNC Symbol;Acc:HGNC:16385]	ENSG00000130305.17	NSUN5	55695	1.13	5.11	156	9.06e-25	1.91e-23	24
10	98416198	98446947	30750	-	ENSG00000107521	HPS1	protein_coding	chromosome	HPS1 biogenesis of lysosomal organelles complex 3 subunit 1 [Source:HGNC Symbol;Acc:HGNC:5163]	ENSG00000107521.19	HPS1	3257	-0.991	6.64	156	9.1e-25	1.91e-23	24
11	119084866	119093549	8684	+	ENSG00000256269	HMBS	protein_coding	chromosome	hydroxymethylbilane synthase [Source:HGNC Symbol;Acc:HGNC:4982]	ENSG00000256269.10	HMBS	3145	1.47	4.34	156	9.12e-25	1.91e-23	24
10	92593130	92655395	62266	+	ENSG00000138160	KIF11	protein_coding	chromosome	kinesin family member 11 [Source:HGNC Symbol;Acc:HGNC:6388]	ENSG00000138160.6	KIF11	3832	2.1	3.73	156	9.22e-25	1.93e-23	24
7	10973336	11169630	196295	+	ENSG00000106443	PHF14	protein_coding	chromosome	PHD finger protein 14 [Source:HGNC Symbol;Acc:HGNC:22203]	ENSG00000106443.16	PHF14	9678	1.22	4.5	156	9.23e-25	1.93e-23	24
11	767220	777488	10269	-	ENSG00000177225	GATD1	protein_coding	chromosome	glutamine amidotransferase like class 1 domain containing 1 [Source:HGNC Symbol;Acc:HGNC:26616]	ENSG00000177225.17	GATD1	347862	1.03	6.31	156	9.34e-25	1.95e-23	24
17	44849948	44899445	49498	-	ENSG00000108883	EFTUD2	protein_coding	chromosome	elongation factor Tu GTP binding domain containing 2 [Source:HGNC Symbol;Acc:HGNC:30858]	ENSG00000108883.13	EFTUD2	9343	0.879	5.98	156	9.68e-25	2.02e-23	24
1	19251805	19260128	8324	+	ENSG00000053372	MRTO4	protein_coding	chromosome	MRT4 homolog, ribosome maturation factor [Source:HGNC Symbol;Acc:HGNC:18477]	ENSG00000053372.5	MRTO4	51154	1.34	4.89	156	9.72e-25	2.03e-23	24
1	37692481	37709719	17239	+	ENSG00000134690	CDCA8	protein_coding	chromosome	cell division cycle associated 8 [Source:HGNC Symbol;Acc:HGNC:14629]	ENSG00000134690.11	CDCA8	55143	1.58	4.04	156	9.78e-25	2.04e-23	24
6	166364919	166383013	18095	-	ENSG00000060762	MPC1	protein_coding	chromosome	mitochondrial pyruvate carrier 1 [Source:HGNC Symbol;Acc:HGNC:21606]	ENSG00000060762.19	MPC1	51660	-1.27	5.17	156	9.81e-25	2.04e-23	24
19	18374731	18389176	14446	+	ENSG00000130513	GDF15	protein_coding	chromosome	growth differentiation factor 15 [Source:HGNC Symbol;Acc:HGNC:30142]	ENSG00000130513.6	GDF15	9518	2.81	7.07	156	9.86e-25	2.05e-23	24
11	69641087	69654474	13388	+	ENSG00000110092	CCND1	protein_coding	chromosome	cyclin D1 [Source:HGNC Symbol;Acc:HGNC:1582]	ENSG00000110092.3	CCND1	595	1.7	6.64	156	9.88e-25	2.05e-23	24
1	184051651	184123978	72328	+	ENSG00000198860	TSEN15	protein_coding	chromosome	tRNA splicing endonuclease subunit 15 [Source:HGNC Symbol;Acc:HGNC:16791]	ENSG00000198860.12	TSEN15	116461	1.35	3.31	156	1e-24	2.08e-23	24
22	46762617	47175699	413083	+	ENSG00000054611	TBC1D22A	protein_coding	chromosome	TBC1 domain family member 22A [Source:HGNC Symbol;Acc:HGNC:1309]	ENSG00000054611.14	TBC1D22A	25771	-0.732	5.43	156	1.02e-24	2.11e-23	24
2	170715337	170718078	2742	+	ENSG00000204335	SP5	protein_coding	chromosome	Sp5 transcription factor [Source:HGNC Symbol;Acc:HGNC:14529]	ENSG00000204335.4	SP5	389058	3.66	3.37	156	1.03e-24	2.14e-23	24
17	40287879	40304657	16779	+	ENSG00000094804	CDC6	protein_coding	chromosome	cell division cycle 6 [Source:HGNC Symbol;Acc:HGNC:1744]	ENSG00000094804.12	CDC6	990	2.07	3.86	156	1.04e-24	2.15e-23	24
11	4094707	4138932	44226	+	ENSG00000167325	RRM1	protein_coding	chromosome	ribonucleotide reductase catalytic subunit M1 [Source:HGNC Symbol;Acc:HGNC:10451]	ENSG00000167325.15	RRM1	6240	1.43	5.02	156	1.04e-24	2.15e-23	24
11	71787510	71801237	13728	+	ENSG00000158483	FAM86C1	protein_coding	chromosome	family with sequence similarity 86 member C1 [Source:HGNC Symbol;Acc:HGNC:25561]	ENSG00000158483.16	FAM86C1	55199	1.16	2.71	156	1.07e-24	2.19e-23	24
9	35906202	35907136	935	+	ENSG00000196196	HRCT1	protein_coding	chromosome	histidine rich carboxyl terminus 1 [Source:HGNC Symbol;Acc:HGNC:33872]	ENSG00000196196.3	HRCT1	646962	-2.43	5.1	155	1.22e-24	2.51e-23	23.9
17	75012670	75021261	8592	+	ENSG00000167862	MRPL58	protein_coding	chromosome	mitochondrial ribosomal protein L58 [Source:HGNC Symbol;Acc:HGNC:5359]	ENSG00000167862.10	MRPL58	3396	1.08	3.94	155	1.26e-24	2.58e-23	23.9
15	41320794	41381050	60257	+	ENSG00000137804	NUSAP1	protein_coding	chromosome	nucleolar and spindle associated protein 1 [Source:HGNC Symbol;Acc:HGNC:18538]	ENSG00000137804.14	NUSAP1	51203	2.44	3.71	155	1.4e-24	2.87e-23	23.9
15	45023181	45077185	54005	+	ENSG00000140263	SORD	protein_coding	chromosome	sorbitol dehydrogenase [Source:HGNC Symbol;Acc:HGNC:11184]	ENSG00000140263.14	SORD	6652	1.98	5.56	154	1.47e-24	3.01e-23	23.8
2	112736349	112764664	28316	-	ENSG00000169607	CKAP2L	protein_coding	chromosome	cytoskeleton associated protein 2 like [Source:HGNC Symbol;Acc:HGNC:26877]	ENSG00000169607.13	CKAP2L	150468	2.51	2.44	154	1.52e-24	3.11e-23	23.8
11	32583798	32606264	22467	+	ENSG00000149100	EIF3M	protein_coding	chromosome	eukaryotic translation initiation factor 3 subunit M [Source:HGNC Symbol;Acc:HGNC:24460]	ENSG00000149100.13	EIF3M	10480	1.18	6.11	154	1.53e-24	3.13e-23	23.8
11	78435968	78574874	138907	-	ENSG00000137513	NARS2	protein_coding	chromosome	asparaginyl-tRNA synthetase 2, mitochondrial [Source:HGNC Symbol;Acc:HGNC:26274]	ENSG00000137513.10	NARS2	79731	1.85	3.6	154	1.55e-24	3.17e-23	23.8
1	44783585	44788170	4586	-	ENSG00000142959	BEST4	protein_coding	chromosome	bestrophin 4 [Source:HGNC Symbol;Acc:HGNC:17106]	ENSG00000142959.5	BEST4	266675	-4.73	7.55	154	1.58e-24	3.22e-23	23.8
20	3208868	3223870	15003	+	ENSG00000125877	ITPA	protein_coding	chromosome	inosine triphosphatase [Source:HGNC Symbol;Acc:HGNC:6176]	ENSG00000125877.13	ITPA	3704	1.05	5.54	154	1.6e-24	3.25e-23	23.8
13	29509414	29595688	86275	-	ENSG00000139514	SLC7A1	protein_coding	chromosome	solute carrier family 7 member 1 [Source:HGNC Symbol;Acc:HGNC:11057]	ENSG00000139514.13	SLC7A1	6541	1.75	5.71	154	1.6e-24	3.25e-23	23.8
12	120578764	120581402	2639	-	ENSG00000167272	POP5	protein_coding	chromosome	POP5 homolog, ribonuclease P/MRP subunit [Source:HGNC Symbol;Acc:HGNC:17689]	ENSG00000167272.11	POP5	51367	1.01	3.96	154	1.69e-24	3.43e-23	23.8
5	55424854	55534969	110116	-	ENSG00000067113	PLPP1	protein_coding	chromosome	phospholipid phosphatase 1 [Source:HGNC Symbol;Acc:HGNC:9228]	ENSG00000067113.17	PLPP1	8611	-1.87	5.91	154	1.7e-24	3.45e-23	23.8
X	49171898	49175235	3338	+	ENSG00000102007	PLP2	protein_coding	chromosome	proteolipid protein 2 [Source:HGNC Symbol;Acc:HGNC:9087]	ENSG00000102007.11	PLP2	5355	1.43	6.67	154	1.72e-24	3.48e-23	23.8
5	172641263	172691540	50278	+	ENSG00000214357	NEURL1B	protein_coding	chromosome	neuralized E3 ubiquitin protein ligase 1B [Source:HGNC Symbol;Acc:HGNC:35422]	ENSG00000214357.9	NEURL1B	54492	-1.74	6.95	154	1.73e-24	3.5e-23	23.8
3	48636463	48662886	26424	-	ENSG00000008300	CELSR3	protein_coding	chromosome	cadherin EGF LAG seven-pass G-type receptor 3 [Source:HGNC Symbol;Acc:HGNC:3230]	ENSG00000008300.17	CELSR3	1951	2.12	4.62	154	1.74e-24	3.5e-23	23.8
12	94567122	94650557	83436	-	ENSG00000057704	TMCC3	protein_coding	chromosome	transmembrane and coiled-coil domain family 3 [Source:HGNC Symbol;Acc:HGNC:29199]	ENSG00000057704.13	TMCC3	57458	-2.44	6.14	154	1.74e-24	3.5e-23	23.8
13	71437966	71867204	429239	-	ENSG00000276644	DACH1	protein_coding	chromosome	dachshund family transcription factor 1 [Source:HGNC Symbol;Acc:HGNC:2663]	ENSG00000276644.5	DACH1	1602	2.42	3.48	153	1.85e-24	3.72e-23	23.7
5	126776623	126837020	60398	+	ENSG00000113368	LMNB1	protein_coding	chromosome	lamin B1 [Source:HGNC Symbol;Acc:HGNC:6637]	ENSG00000113368.12	LMNB1	4001	1.88	5.11	153	1.87e-24	3.76e-23	23.7
1	45002540	45011324	8785	-	ENSG00000126107	HECTD3	protein_coding	chromosome	HECT domain E3 ubiquitin protein ligase 3 [Source:HGNC Symbol;Acc:HGNC:26117]	ENSG00000126107.15	HECTD3	79654	-1.28	7.04	153	1.88e-24	3.78e-23	23.7
1	151837819	151840557	2739	-	ENSG00000225556	C2CD4D	protein_coding	chromosome	C2 calcium dependent domain containing 4D [Source:HGNC Symbol;Acc:HGNC:37210]	ENSG00000225556.1	C2CD4D	100191040	2.07	1.52	153	1.88e-24	3.78e-23	23.7
19	13795460	13832230	36771	+	ENSG00000132003	ZSWIM4	protein_coding	chromosome	zinc finger SWIM-type containing 4 [Source:HGNC Symbol;Acc:HGNC:25704]	ENSG00000132003.9	ZSWIM4	65249	1.23	3.57	153	1.91e-24	3.83e-23	23.7
19	17555649	17583162	27514	+	ENSG00000130309	COLGALT1	protein_coding	chromosome	collagen beta(1-O)galactosyltransferase 1 [Source:HGNC Symbol;Acc:HGNC:26182]	ENSG00000130309.11	COLGALT1	79709	0.929	6.69	153	1.92e-24	3.84e-23	23.7
16	28605196	28623625	18430	-	ENSG00000196502	SULT1A1	protein_coding	chromosome	sulfotransferase family 1A member 1 [Source:HGNC Symbol;Acc:HGNC:11453]	ENSG00000196502.11	SULT1A1	6817	-2.2	6.87	153	1.92e-24	3.84e-23	23.7
1	225919877	225924340	4464	-	ENSG00000143811	PYCR2	protein_coding	chromosome	pyrroline-5-carboxylate reductase 2 [Source:HGNC Symbol;Acc:HGNC:30262]	ENSG00000143811.19	PYCR2	29920	0.808	5.84	153	1.93e-24	3.86e-23	23.7
12	56222015	56229854	7840	+	ENSG00000139579	NABP2	protein_coding	chromosome	nucleic acid binding protein 2 [Source:HGNC Symbol;Acc:HGNC:28412]	ENSG00000139579.13	NABP2	79035	0.924	4.73	153	1.95e-24	3.88e-23	23.7
5	65517766	65563168	45403	-	ENSG00000123219	CENPK	protein_coding	chromosome	centromere protein K [Source:HGNC Symbol;Acc:HGNC:29479]	ENSG00000123219.13	CENPK	64105	1.71	2.14	153	1.99e-24	3.96e-23	23.7
5	43444252	43483893	39642	-	ENSG00000151881	TMEM267	protein_coding	chromosome	transmembrane protein 267 [Source:HGNC Symbol;Acc:HGNC:26139]	ENSG00000151881.14	TMEM267	64417	1.16	2.56	153	2.03e-24	4.04e-23	23.7
9	100427156	100451711	24556	+	ENSG00000066697	MSANTD3	protein_coding	chromosome	Myb/SANT DNA binding domain containing 3 [Source:HGNC Symbol;Acc:HGNC:23370]	ENSG00000066697.14	MSANTD3	91283	1.21	2.82	153	2.05e-24	4.08e-23	23.7
3	69084937	69106092	21156	+	ENSG00000144746	ARL6IP5	protein_coding	chromosome	ADP ribosylation factor like GTPase 6 interacting protein 5 [Source:HGNC Symbol;Acc:HGNC:16937]	ENSG00000144746.7	ARL6IP5	10550	-1.05	6.09	153	2.05e-24	4.08e-23	23.7
17	35128730	35142304	13575	-	ENSG00000073536	NLE1	protein_coding	chromosome	notchless homolog 1 [Source:HGNC Symbol;Acc:HGNC:19889]	ENSG00000073536.18	NLE1	54475	2.16	4.01	153	2.08e-24	4.13e-23	23.7
11	120211032	120230334	19303	+	ENSG00000184232	OAF	protein_coding	chromosome	out at first homolog [Source:HGNC Symbol;Acc:HGNC:28752]	ENSG00000184232.9	OAF	220323	-1.37	7.45	153	2.12e-24	4.2e-23	23.7
10	103396626	103446294	49669	+	ENSG00000148843	PDCD11	protein_coding	chromosome	programmed cell death 11 [Source:HGNC Symbol;Acc:HGNC:13408]	ENSG00000148843.15	PDCD11	22984	1.51	5.33	153	2.15e-24	4.26e-23	23.7
19	11322068	11346270	24203	-	ENSG00000105514	RAB3D	protein_coding	chromosome	RAB3D, member RAS oncogene family [Source:HGNC Symbol;Acc:HGNC:9779]	ENSG00000105514.8	RAB3D	9545	1.3	3.96	153	2.2e-24	4.36e-23	23.7
16	27313668	27364778	51111	+	ENSG00000077238	IL4R	protein_coding	chromosome	interleukin 4 receptor [Source:HGNC Symbol;Acc:HGNC:6015]	ENSG00000077238.14	IL4R	3566	-0.982	7.26	152	2.31e-24	4.57e-23	23.6
9	127940582	127980989	40408	-	ENSG00000167106	FAM102A	protein_coding	chromosome	family with sequence similarity 102 member A [Source:HGNC Symbol;Acc:HGNC:31419]	ENSG00000167106.12	FAM102A	399665	-1.52	7.55	152	2.32e-24	4.57e-23	23.6
5	136028988	136063818	34831	+	ENSG00000120708	TGFBI	protein_coding	chromosome	transforming growth factor beta induced [Source:HGNC Symbol;Acc:HGNC:11771]	ENSG00000120708.17	TGFBI	7045	2.4	7.74	152	2.34e-24	4.6e-23	23.6
2	97113218	97264434	151217	+	ENSG00000135976	ANKRD36	protein_coding	chromosome	ankyrin repeat domain 36 [Source:HGNC Symbol;Acc:HGNC:24079]	ENSG00000135976.19	ANKRD36	375248	1.1	3.5	152	2.36e-24	4.64e-23	23.6
12	2794970	2805423	10454	+	ENSG00000004478	FKBP4	protein_coding	chromosome	FKBP prolyl isomerase 4 [Source:HGNC Symbol;Acc:HGNC:3720]	ENSG00000004478.8	FKBP4	2288	1.47	6.99	152	2.39e-24	4.7e-23	23.6
19	10106362	10112012	5651	+	ENSG00000130810	PPAN	protein_coding	chromosome	peter pan homolog [Source:HGNC Symbol;Acc:HGNC:9227]	ENSG00000130810.20	PPAN	56342	1.46	5.37	152	2.4e-24	4.7e-23	23.6
3	126704240	126960420	256181	+	ENSG00000159685	CHCHD6	protein_coding	chromosome	coiled-coil-helix-coiled-coil-helix domain containing 6 [Source:HGNC Symbol;Acc:HGNC:28184]	ENSG00000159685.11	CHCHD6	84303	1.54	2.92	152	2.44e-24	4.78e-23	23.6
11	33039417	33105943	66527	+	ENSG00000176148	TCP11L1	protein_coding	chromosome	t-complex 11 like 1 [Source:HGNC Symbol;Acc:HGNC:25655]	ENSG00000176148.16	TCP11L1	55346	-1.56	3.72	152	2.46e-24	4.82e-23	23.6
8	90058608	90095475	36868	-	ENSG00000104327	CALB1	protein_coding	chromosome	calbindin 1 [Source:HGNC Symbol;Acc:HGNC:1434]	ENSG00000104327.7	CALB1	793	2.69	2.94	152	2.49e-24	4.87e-23	23.6
X	72329516	72573101	243586	-	ENSG00000147099	HDAC8	protein_coding	chromosome	histone deacetylase 8 [Source:HGNC Symbol;Acc:HGNC:13315]	ENSG00000147099.21	HDAC8	55869	0.876	3.76	152	2.51e-24	4.91e-23	23.6
4	75913660	75941013	27354	-	ENSG00000138744	NAAA	protein_coding	chromosome	N-acylethanolamine acid amidase [Source:HGNC Symbol;Acc:HGNC:736]	ENSG00000138744.16	NAAA	27163	-2.32	6.53	152	2.53e-24	4.94e-23	23.6
14	23047062	23057538	10477	-	ENSG00000139880	CDH24	protein_coding	chromosome	cadherin 24 [Source:HGNC Symbol;Acc:HGNC:14265]	ENSG00000139880.19	CDH24	64403	1.76	4.27	152	2.69e-24	5.25e-23	23.6
13	48232612	48270357	37746	+	ENSG00000136156	ITM2B	protein_coding	chromosome	integral membrane protein 2B [Source:HGNC Symbol;Acc:HGNC:6174]	ENSG00000136156.15	ITM2B	9445	-1.2	7.97	152	2.7e-24	5.25e-23	23.6
1	23845077	23868294	23218	-	ENSG00000179163	FUCA1	protein_coding	chromosome	alpha-L-fucosidase 1 [Source:HGNC Symbol;Acc:HGNC:4006]	ENSG00000179163.11	FUCA1	2517	-1.8	6.93	152	2.7e-24	5.25e-23	23.6
8	126552443	126558478	6036	-	ENSG00000168672	LRATD2	protein_coding	chromosome	LRAT domain containing 2 [Source:HGNC Symbol;Acc:HGNC:24166]	ENSG00000168672.4	LRATD2	157638	1.51	5.32	152	2.73e-24	5.29e-23	23.6
15	50702266	50765709	63444	-	ENSG00000138600	SPPL2A	protein_coding	chromosome	signal peptide peptidase like 2A [Source:HGNC Symbol;Acc:HGNC:30227]	ENSG00000138600.10	SPPL2A	84888	-1.83	6.26	152	2.79e-24	5.4e-23	23.6
19	36214602	36238774	24173	+	ENSG00000167635	ZNF146	protein_coding	chromosome	zinc finger protein 146 [Source:HGNC Symbol;Acc:HGNC:12931]	ENSG00000167635.11	ZNF146	7705	1.08	5.05	152	2.81e-24	5.44e-23	23.6
15	43403061	43510728	107668	-	ENSG00000067369	TP53BP1	protein_coding	chromosome	tumor protein p53 binding protein 1 [Source:HGNC Symbol;Acc:HGNC:11999]	ENSG00000067369.13	TP53BP1	7158	1.03	5.07	152	2.82e-24	5.45e-23	23.5
11	61348745	61362299	13555	-	ENSG00000162144	CYB561A3	protein_coding	chromosome	cytochrome b561 family member A3 [Source:HGNC Symbol;Acc:HGNC:23014]	ENSG00000162144.9	CYB561A3	220002	-0.851	6.02	152	2.85e-24	5.51e-23	23.5
6	107065182	107115269	50088	-	ENSG00000178409	BEND3	protein_coding	chromosome	BEN domain containing 3 [Source:HGNC Symbol;Acc:HGNC:23040]	ENSG00000178409.13	BEND3	57673	1.54	2.9	151	3.05e-24	5.89e-23	23.5
11	9384652	9448127	63476	+	ENSG00000205339	IPO7	protein_coding	chromosome	importin 7 [Source:HGNC Symbol;Acc:HGNC:9852]	ENSG00000205339.10	IPO7	10527	1.33	6.08	151	3.06e-24	5.89e-23	23.5
7	19695461	19709037	13577	-	ENSG00000105849	TWISTNB	protein_coding	chromosome	TWIST neighbor [Source:HGNC Symbol;Acc:HGNC:18027]	ENSG00000105849.6	TWISTNB	221830	1.5	3.42	151	3.08e-24	5.93e-23	23.5
9	113297093	113303376	6284	-	ENSG00000165188	RNF183	protein_coding	chromosome	ring finger protein 183 [Source:HGNC Symbol;Acc:HGNC:28721]	ENSG00000165188.13	RNF183	138065	3.2	2.34	151	3.11e-24	5.98e-23	23.5
13	44939249	44989471	50223	-	ENSG00000083635	NUFIP1	protein_coding	chromosome	nuclear FMR1 interacting protein 1 [Source:HGNC Symbol;Acc:HGNC:8057]	ENSG00000083635.8	NUFIP1	26747	1.99	2.48	151	3.12e-24	5.99e-23	23.5
10	87659613	87747705	88093	+	ENSG00000198682	PAPSS2	protein_coding	chromosome	3'-phosphoadenosine 5'-phosphosulfate synthase 2 [Source:HGNC Symbol;Acc:HGNC:8604]	ENSG00000198682.13	PAPSS2	9060	-1.93	7.12	151	3.13e-24	6.01e-23	23.5
10	5861616	5889906	28291	-	ENSG00000134461	ANKRD16	protein_coding	chromosome	ankyrin repeat domain 16 [Source:HGNC Symbol;Acc:HGNC:23471]	ENSG00000134461.16	ANKRD16	54522	1.42	2.99	151	3.14e-24	6.01e-23	23.5
12	48105139	48146404	41266	+	ENSG00000152556	PFKM	protein_coding	chromosome	phosphofructokinase, muscle [Source:HGNC Symbol;Acc:HGNC:8877]	ENSG00000152556.17	PFKM	5213	1.08	5.24	151	3.15e-24	6.03e-23	23.5
1	91500851	91525764	24914	+	ENSG00000097046	CDC7	protein_coding	chromosome	cell division cycle 7 [Source:HGNC Symbol;Acc:HGNC:1745]	ENSG00000097046.13	CDC7	8317	1.86	2.39	151	3.16e-24	6.03e-23	23.5
12	6493356	6531955	38600	+	ENSG00000010292	NCAPD2	protein_coding	chromosome	non-SMC condensin I complex subunit D2 [Source:HGNC Symbol;Acc:HGNC:24305]	ENSG00000010292.13	NCAPD2	9918	1.11	5.85	151	3.2e-24	6.11e-23	23.5
3	71675414	71754773	79360	-	ENSG00000163412	EIF4E3	protein_coding	chromosome	eukaryotic translation initiation factor 4E family member 3 [Source:HGNC Symbol;Acc:HGNC:31837]	ENSG00000163412.13	EIF4E3	317649	-1.7	4.61	151	3.25e-24	6.2e-23	23.5
17	50373220	50381483	8264	+	ENSG00000154920	EME1	protein_coding	chromosome	essential meiotic structure-specific endonuclease 1 [Source:HGNC Symbol;Acc:HGNC:24965]	ENSG00000154920.14	EME1	146956	2.36	1.84	151	3.27e-24	6.22e-23	23.5
1	100083563	100132955	49393	-	ENSG00000156876	SASS6	protein_coding	chromosome	SAS-6 centriolar assembly protein [Source:HGNC Symbol;Acc:HGNC:25403]	ENSG00000156876.10	SASS6	163786	1.53	1.93	151	3.28e-24	6.25e-23	23.5
17	6057807	6124427	66621	+	ENSG00000179314	WSCD1	protein_coding	chromosome	WSC domain containing 1 [Source:HGNC Symbol;Acc:HGNC:29060]	ENSG00000179314.14	WSCD1	23302	-2.7	4.86	151	3.3e-24	6.27e-23	23.5
1	53196792	53214197	17406	+	ENSG00000157184	CPT2	protein_coding	chromosome	carnitine palmitoyltransferase 2 [Source:HGNC Symbol;Acc:HGNC:2330]	ENSG00000157184.7	CPT2	1376	-1.28	5.59	151	3.34e-24	6.33e-23	23.5
3	48446710	48467645	20936	+	ENSG00000164053	ATRIP	protein_coding	chromosome	ATR interacting protein [Source:HGNC Symbol;Acc:HGNC:33499]	ENSG00000164053.21	ATRIP	84126	1	3.75	151	3.34e-24	6.33e-23	23.5
1	113905213	113914086	8874	+	ENSG00000118655	DCLRE1B	protein_coding	chromosome	DNA cross-link repair 1B [Source:HGNC Symbol;Acc:HGNC:17641]	ENSG00000118655.7	DCLRE1B	64858	1.48	2.56	151	3.36e-24	6.36e-23	23.5
17	74770529	74776367	5839	-	ENSG00000109065	NAT9	protein_coding	chromosome	N-acetyltransferase 9 (putative) [Source:HGNC Symbol;Acc:HGNC:23133]	ENSG00000109065.12	NAT9	26151	1	5.22	151	3.37e-24	6.38e-23	23.5
11	68707440	68751520	44081	-	ENSG00000132749	TESMIN	protein_coding	chromosome	testis expressed metallothionein like protein [Source:HGNC Symbol;Acc:HGNC:7446]	ENSG00000132749.11	TESMIN	9633	2.03	3.05	151	3.39e-24	6.41e-23	23.5
4	1811479	1856156	44678	-	ENSG00000168924	LETM1	protein_coding	chromosome	leucine zipper and EF-hand containing transmembrane protein 1 [Source:HGNC Symbol;Acc:HGNC:6556]	ENSG00000168924.15	LETM1	3954	-1.34	6.82	151	3.45e-24	6.51e-23	23.5
X	153447666	153495516	47851	-	ENSG00000213397	HAUS7	protein_coding	chromosome	HAUS augmin like complex subunit 7 [Source:HGNC Symbol;Acc:HGNC:32979]	ENSG00000213397.10	HAUS7	55559	1.4	4.15	151	3.65e-24	6.88e-23	23.4
15	64815632	64825668	10037	-	ENSG00000140451	PIF1	protein_coding	chromosome	PIF1 5'-to-3' DNA helicase [Source:HGNC Symbol;Acc:HGNC:26220]	ENSG00000140451.13	PIF1	80119	1.63	3.45	151	3.72e-24	7.01e-23	23.4
17	65528563	65561648	33086	-	ENSG00000168646	AXIN2	protein_coding	chromosome	axin 2 [Source:HGNC Symbol;Acc:HGNC:904]	ENSG00000168646.13	AXIN2	8313	2.39	6.78	150	3.81e-24	7.16e-23	23.4
8	144789765	144792587	2823	-	ENSG00000161016	RPL8	protein_coding	chromosome	ribosomal protein L8 [Source:HGNC Symbol;Acc:HGNC:10368]	ENSG00000161016.17	RPL8	6132	1.34	10.6	150	3.84e-24	7.21e-23	23.4
9	136410641	136423761	13121	+	ENSG00000165688	PMPCA	protein_coding	chromosome	peptidase, mitochondrial processing alpha subunit [Source:HGNC Symbol;Acc:HGNC:18667]	ENSG00000165688.12	PMPCA	23203	0.798	5.99	150	3.84e-24	7.21e-23	23.4
19	35545600	35547526	1927	+	ENSG00000105677	TMEM147	protein_coding	chromosome	transmembrane protein 147 [Source:HGNC Symbol;Acc:HGNC:30414]	ENSG00000105677.12	TMEM147	10430	1.31	5.52	150	3.91e-24	7.33e-23	23.4
1	54169651	54200036	30386	-	ENSG00000215883	CYB5RL	protein_coding	chromosome	cytochrome b5 reductase like [Source:HGNC Symbol;Acc:HGNC:32220]	ENSG00000215883.10	CYB5RL	606495	1.01	3.43	150	3.91e-24	7.33e-23	23.4
1	26169908	26170873	966	+	ENSG00000142684	ZNF593	protein_coding	chromosome	zinc finger protein 593 [Source:HGNC Symbol;Acc:HGNC:30943]	ENSG00000142684.9	ZNF593	51042	1.57	4.38	150	3.97e-24	7.43e-23	23.4
1	22710839	22921500	210662	+	ENSG00000133216	EPHB2	protein_coding	chromosome	EPH receptor B2 [Source:HGNC Symbol;Acc:HGNC:3393]	ENSG00000133216.16	EPHB2	2048	2.38	6.62	150	4e-24	7.46e-23	23.4
5	56919602	56971675	52074	-	ENSG00000155545	MIER3	protein_coding	chromosome	MIER family member 3 [Source:HGNC Symbol;Acc:HGNC:26678]	ENSG00000155545.19	MIER3	166968	-2.19	6.19	150	4.02e-24	7.5e-23	23.4
19	48552075	48599425	47351	+	ENSG00000088002	SULT2B1	protein_coding	chromosome	sulfotransferase family 2B member 1 [Source:HGNC Symbol;Acc:HGNC:11459]	ENSG00000088002.11	SULT2B1	6820	2.87	3.41	150	4.09e-24	7.62e-23	23.4
2	61868085	61888671	20587	-	ENSG00000115484	CCT4	protein_coding	chromosome	chaperonin containing TCP1 subunit 4 [Source:HGNC Symbol;Acc:HGNC:1617]	ENSG00000115484.15	CCT4	10575	1.28	6.22	150	4.29e-24	7.98e-23	23.4
7	100826820	100867010	40191	+	ENSG00000146828	SLC12A9	protein_coding	chromosome	solute carrier family 12 member 9 [Source:HGNC Symbol;Acc:HGNC:17435]	ENSG00000146828.18	SLC12A9	56996	1.07	6.28	150	4.29e-24	7.98e-23	23.4
3	38103129	38137242	34114	-	ENSG00000060971	ACAA1	protein_coding	chromosome	acetyl-CoA acyltransferase 1 [Source:HGNC Symbol;Acc:HGNC:82]	ENSG00000060971.18	ACAA1	30	-1.35	7.47	150	4.42e-24	8.21e-23	23.4
2	47402969	47663146	260178	+	ENSG00000095002	MSH2	protein_coding	chromosome	mutS homolog 2 [Source:HGNC Symbol;Acc:HGNC:7325]	ENSG00000095002.14	MSH2	4436	1.38	4.01	150	4.51e-24	8.36e-23	23.3
22	23145326	23164350	19025	+	ENSG00000100228	RAB36	protein_coding	chromosome	RAB36, member RAS oncogene family [Source:HGNC Symbol;Acc:HGNC:9775]	ENSG00000100228.12	RAB36	9609	1.53	2.45	150	4.67e-24	8.65e-23	23.3
9	127447674	127451406	3733	-	ENSG00000197958	RPL12	protein_coding	chromosome	ribosomal protein L12 [Source:HGNC Symbol;Acc:HGNC:10302]	ENSG00000197958.13	RPL12	6136	1.25	9.22	150	4.67e-24	8.65e-23	23.3
12	123633739	123662604	28866	+	ENSG00000111358	GTF2H3	protein_coding	chromosome	general transcription factor IIH subunit 3 [Source:HGNC Symbol;Acc:HGNC:4657]	ENSG00000111358.14	GTF2H3	2967	1.02	4.1	150	4.73e-24	8.74e-23	23.3
11	78100936	78139653	38718	-	ENSG00000159063	ALG8	protein_coding	chromosome	ALG8 alpha-1,3-glucosyltransferase [Source:HGNC Symbol;Acc:HGNC:23161]	ENSG00000159063.13	ALG8	79053	1.4	3.79	150	4.78e-24	8.83e-23	23.3
13	78614289	78659155	44867	-	ENSG00000152193	OBI1	protein_coding	chromosome	ORC ubiquitin ligase 1 [Source:HGNC Symbol;Acc:HGNC:20308]	ENSG00000152193.8	OBI1	79596	1.27	2.94	150	4.79e-24	8.84e-23	23.3
1	26432282	26471306	39025	+	ENSG00000117682	DHDDS	protein_coding	chromosome	dehydrodolichyl diphosphate synthase subunit [Source:HGNC Symbol;Acc:HGNC:20603]	ENSG00000117682.17	DHDDS	79947	-1.43	6.02	149	4.9e-24	9.02e-23	23.3
9	127690348	127724873	34526	-	ENSG00000187024	PTRH1	protein_coding	chromosome	peptidyl-tRNA hydrolase 1 homolog [Source:HGNC Symbol;Acc:HGNC:27039]	ENSG00000187024.14	PTRH1	138428	1.58	3.79	149	4.98e-24	9.18e-23	23.3
X	38561370	38688920	127551	+	ENSG00000156298	TSPAN7	protein_coding	chromosome	tetraspanin 7 [Source:HGNC Symbol;Acc:HGNC:11854]	ENSG00000156298.12	TSPAN7	7102	-2.17	5.46	149	5e-24	9.19e-23	23.3
1	235109341	235128837	19497	-	ENSG00000173726	TOMM20	protein_coding	chromosome	translocase of outer mitochondrial membrane 20 [Source:HGNC Symbol;Acc:HGNC:20947]	ENSG00000173726.11	TOMM20	9804	1.14	6.42	149	5.06e-24	9.29e-23	23.3
22	41576900	41589871	12972	-	ENSG00000100417	PMM1	protein_coding	chromosome	phosphomannomutase 1 [Source:HGNC Symbol;Acc:HGNC:9114]	ENSG00000100417.12	PMM1	5372	-1.28	5.85	149	5.11e-24	9.37e-23	23.3
5	178208471	178232802	24332	-	ENSG00000175309	PHYKPL	protein_coding	chromosome	5-phosphohydroxy-L-lysine phospho-lyase [Source:HGNC Symbol;Acc:HGNC:28249]	ENSG00000175309.15	PHYKPL	85007	-1.51	7.1	149	5.14e-24	9.42e-23	23.3
17	4669774	4704337	34564	-	ENSG00000141456	PELP1	protein_coding	chromosome	proline, glutamate and leucine rich protein 1 [Source:HGNC Symbol;Acc:HGNC:30134]	ENSG00000141456.16	PELP1	27043	1.36	5.52	149	5.18e-24	9.48e-23	23.3
6	143422832	143450695	27864	-	ENSG00000189007	ADAT2	protein_coding	chromosome	adenosine deaminase tRNA specific 2 [Source:HGNC Symbol;Acc:HGNC:21172]	ENSG00000189007.16	ADAT2	134637	1.76	3.8	149	5.21e-24	9.52e-23	23.3
7	73440406	73522293	81888	-	ENSG00000009954	BAZ1B	protein_coding	chromosome	bromodomain adjacent to zinc finger domain 1B [Source:HGNC Symbol;Acc:HGNC:961]	ENSG00000009954.11	BAZ1B	9031	0.747	5.99	149	5.23e-24	9.56e-23	23.3
5	43486709	43515148	28440	-	ENSG00000172244	C5orf34	protein_coding	chromosome	chromosome 5 open reading frame 34 [Source:HGNC Symbol;Acc:HGNC:24738]	ENSG00000172244.9	C5orf34	375444	2.08	0.848	149	5.34e-24	9.73e-23	23.3
17	17681458	17811453	129996	+	ENSG00000108557	RAI1	protein_coding	chromosome	retinoic acid induced 1 [Source:HGNC Symbol;Acc:HGNC:9834]	ENSG00000108557.19	RAI1	10743	1.33	5.24	149	5.6e-24	1.02e-22	23.3
1	228456979	228457873	895	-	ENSG00000181218	HIST3H2A	protein_coding	chromosome	histone cluster 3 H2A [Source:HGNC Symbol;Acc:HGNC:20507]	ENSG00000181218.5	HIST3H2A	92815	1.86	2.76	149	5.77e-24	1.05e-22	23.2
1	63440770	63593721	152952	-	ENSG00000142856	ITGB3BP	protein_coding	chromosome	integrin subunit beta 3 binding protein [Source:HGNC Symbol;Acc:HGNC:6157]	ENSG00000142856.16	ITGB3BP	23421	1.52	2.34	149	5.85e-24	1.06e-22	23.2
16	67163385	67165815	2431	+	ENSG00000265690	AC074143.1	protein_coding	chromosome	novel protein	ENSG00000265690.7	AC074143.1	NA	1.91	4.07	149	6.12e-24	1.11e-22	23.2
14	96797382	96931722	134341	+	ENSG00000100749	VRK1	protein_coding	chromosome	VRK serine/threonine kinase 1 [Source:HGNC Symbol;Acc:HGNC:12718]	ENSG00000100749.8	VRK1	7443	1.67	3.09	148	6.21e-24	1.13e-22	23.2
17	75272981	75289510	16530	-	ENSG00000125454	SLC25A19	protein_coding	chromosome	solute carrier family 25 member 19 [Source:HGNC Symbol;Acc:HGNC:14409]	ENSG00000125454.12	SLC25A19	60386	1.28	3.67	148	6.21e-24	1.13e-22	23.2
14	24305096	24311430	6335	-	ENSG00000136305	CIDEB	protein_coding	chromosome	cell death inducing DFFA like effector b [Source:HGNC Symbol;Acc:HGNC:1977]	ENSG00000136305.11	CIDEB	27141	-2.01	3.76	148	6.47e-24	1.17e-22	23.2
6	134169246	134318112	148867	-	ENSG00000118515	SGK1	protein_coding	chromosome	serum/glucocorticoid regulated kinase 1 [Source:HGNC Symbol;Acc:HGNC:10810]	ENSG00000118515.11	SGK1	6446	-2.91	7.65	148	6.48e-24	1.17e-22	23.2
8	100150623	100154003	3381	+	ENSG00000147669	POLR2K	protein_coding	chromosome	RNA polymerase II subunit K [Source:HGNC Symbol;Acc:HGNC:9198]	ENSG00000147669.11	POLR2K	5440	1.1	4.21	148	6.63e-24	1.2e-22	23.2
4	87975650	87983426	7777	+	ENSG00000118785	SPP1	protein_coding	chromosome	secreted phosphoprotein 1 [Source:HGNC Symbol;Acc:HGNC:11255]	ENSG00000118785.14	SPP1	6696	3.88	5.21	148	6.7e-24	1.21e-22	23.2
3	47228026	47283451	55426	-	ENSG00000088727	KIF9	protein_coding	chromosome	kinesin family member 9 [Source:HGNC Symbol;Acc:HGNC:16666]	ENSG00000088727.12	KIF9	64147	1.29	2.46	148	6.96e-24	1.26e-22	23.2
12	54230942	54280133	49192	-	ENSG00000094916	CBX5	protein_coding	chromosome	chromobox 5 [Source:HGNC Symbol;Acc:HGNC:1555]	ENSG00000094916.16	CBX5	23468	0.902	5.34	148	7e-24	1.26e-22	23.2
12	56998836	57006546	7711	-	ENSG00000166860	ZBTB39	protein_coding	chromosome	zinc finger and BTB domain containing 39 [Source:HGNC Symbol;Acc:HGNC:29014]	ENSG00000166860.3	ZBTB39	9880	1.36	2.98	148	7.06e-24	1.27e-22	23.2
11	6390440	6394998	4559	+	ENSG00000166311	SMPD1	protein_coding	chromosome	sphingomyelin phosphodiesterase 1 [Source:HGNC Symbol;Acc:HGNC:11120]	ENSG00000166311.10	SMPD1	6609	-1.97	6.11	148	7.15e-24	1.28e-22	23.1
1	11785723	11806920	21198	-	ENSG00000177000	MTHFR	protein_coding	chromosome	methylenetetrahydrofolate reductase [Source:HGNC Symbol;Acc:HGNC:7436]	ENSG00000177000.12	MTHFR	4524	-1.1	5.59	148	7.21e-24	1.29e-22	23.1
2	26562585	26579532	16948	+	ENSG00000173557	FAM166C	protein_coding	chromosome	family with sequence similarity 166 member C [Source:HGNC Symbol;Acc:HGNC:27938]	ENSG00000173557.15	FAM166C	339778	3.31	1.14	148	7.27e-24	1.3e-22	23.1
17	65009289	65056740	47452	-	ENSG00000120063	GNA13	protein_coding	chromosome	G protein subunit alpha 13 [Source:HGNC Symbol;Acc:HGNC:4381]	ENSG00000120063.10	GNA13	10672	-1.37	6.21	148	7.3e-24	1.31e-22	23.1
9	104094260	104141419	47160	+	ENSG00000136824	SMC2	protein_coding	chromosome	structural maintenance of chromosomes 2 [Source:HGNC Symbol;Acc:HGNC:14011]	ENSG00000136824.19	SMC2	10592	1.72	4.03	148	7.32e-24	1.31e-22	23.1
22	30291990	30327046	35057	-	ENSG00000099992	TBC1D10A	protein_coding	chromosome	TBC1 domain family member 10A [Source:HGNC Symbol;Acc:HGNC:23609]	ENSG00000099992.15	TBC1D10A	83874	-1.12	5.38	148	7.42e-24	1.33e-22	23.1
16	89737549	89816657	79109	-	ENSG00000187741	FANCA	protein_coding	chromosome	FA complementation group A [Source:HGNC Symbol;Acc:HGNC:3582]	ENSG00000187741.15	FANCA	2175	1.97	4.86	148	7.49e-24	1.34e-22	23.1
12	132136594	132144319	7726	-	ENSG00000185163	DDX51	protein_coding	chromosome	DEAD-box helicase 51 [Source:HGNC Symbol;Acc:HGNC:20082]	ENSG00000185163.10	DDX51	317781	1.42	5.26	148	7.77e-24	1.38e-22	23.1
11	67350772	67356972	6201	-	ENSG00000175482	POLD4	protein_coding	chromosome	DNA polymerase delta 4, accessory subunit [Source:HGNC Symbol;Acc:HGNC:14106]	ENSG00000175482.9	POLD4	57804	-1.6	7.22	147	8.12e-24	1.45e-22	23.1
16	75111860	75116771	4912	-	ENSG00000166816	LDHD	protein_coding	chromosome	lactate dehydrogenase D [Source:HGNC Symbol;Acc:HGNC:19708]	ENSG00000166816.14	LDHD	197257	-2.57	5.96	147	8.52e-24	1.51e-22	23.1
9	34252381	34311371	58991	-	ENSG00000186638	KIF24	protein_coding	chromosome	kinesin family member 24 [Source:HGNC Symbol;Acc:HGNC:19916]	ENSG00000186638.16	KIF24	347240	1.73	2.59	147	8.78e-24	1.56e-22	23.1
11	62123998	62153169	29172	+	ENSG00000149503	INCENP	protein_coding	chromosome	inner centromere protein [Source:HGNC Symbol;Acc:HGNC:6058]	ENSG00000149503.13	INCENP	3619	1.32	4.61	147	8.82e-24	1.56e-22	23.1
3	135965728	136147894	182167	+	ENSG00000073711	PPP2R3A	protein_coding	chromosome	protein phosphatase 2 regulatory subunit B''alpha [Source:HGNC Symbol;Acc:HGNC:9307]	ENSG00000073711.11	PPP2R3A	5523	-1.69	3.47	147	8.91e-24	1.58e-22	23
18	2571557	2616635	45079	+	ENSG00000080986	NDC80	protein_coding	chromosome	NDC80 kinetochore complex component [Source:HGNC Symbol;Acc:HGNC:16909]	ENSG00000080986.13	NDC80	10403	1.72	2.55	147	9.31e-24	1.65e-22	23
19	41860255	41872925	12671	+	ENSG00000105372	RPS19	protein_coding	chromosome	ribosomal protein S19 [Source:HGNC Symbol;Acc:HGNC:10402]	ENSG00000105372.8	RPS19	6223	1.31	9.34	147	9.32e-24	1.65e-22	23
1	161118086	161125445	7360	+	ENSG00000158793	NIT1	protein_coding	chromosome	nitrilase 1 [Source:HGNC Symbol;Acc:HGNC:7828]	ENSG00000158793.14	NIT1	4817	-1.06	5.65	147	9.68e-24	1.71e-22	23
4	83535914	83605875	69962	+	ENSG00000138678	GPAT3	protein_coding	chromosome	glycerol-3-phosphate acyltransferase 3 [Source:HGNC Symbol;Acc:HGNC:28157]	ENSG00000138678.11	GPAT3	84803	-2.22	4.14	147	9.84e-24	1.74e-22	23
19	45687454	45692569	5116	-	ENSG00000125743	SNRPD2	protein_coding	chromosome	small nuclear ribonucleoprotein D2 polypeptide [Source:HGNC Symbol;Acc:HGNC:11159]	ENSG00000125743.10	SNRPD2	6633	1.31	6.58	147	9.88e-24	1.74e-22	23
17	1646145	1649866	3722	-	ENSG00000167705	RILP	protein_coding	chromosome	Rab interacting lysosomal protein [Source:HGNC Symbol;Acc:HGNC:30266]	ENSG00000167705.12	RILP	83547	-1.71	5.47	146	1.03e-23	1.82e-22	23
17	78674048	78782297	108250	-	ENSG00000108669	CYTH1	protein_coding	chromosome	cytohesin 1 [Source:HGNC Symbol;Acc:HGNC:9501]	ENSG00000108669.16	CYTH1	9267	-0.969	6.92	146	1.07e-23	1.88e-22	23
3	141228726	141367753	139028	+	ENSG00000155893	PXYLP1	protein_coding	chromosome	2-phosphoxylose phosphatase 1 [Source:HGNC Symbol;Acc:HGNC:26303]	ENSG00000155893.13	PXYLP1	92370	1.39	3.27	146	1.07e-23	1.88e-22	23
1	155610205	155614967	4763	+	ENSG00000125459	MSTO1	protein_coding	chromosome	misato mitochondrial distribution and morphology regulator 1 [Source:HGNC Symbol;Acc:HGNC:29678]	ENSG00000125459.15	MSTO1	55154	1.32	4.64	146	1.08e-23	1.89e-22	23
16	28591943	28597050	5108	-	ENSG00000197165	SULT1A2	protein_coding	chromosome	sulfotransferase family 1A member 2 [Source:HGNC Symbol;Acc:HGNC:11454]	ENSG00000197165.11	SULT1A2	6799	-3.25	5.54	146	1.09e-23	1.92e-22	23
13	97953658	98024296	70639	+	ENSG00000065150	IPO5	protein_coding	chromosome	importin 5 [Source:HGNC Symbol;Acc:HGNC:6402]	ENSG00000065150.21	IPO5	3843	1.7	6.33	146	1.12e-23	1.97e-22	22.9
19	10133345	10231286	97942	-	ENSG00000130816	DNMT1	protein_coding	chromosome	DNA methyltransferase 1 [Source:HGNC Symbol;Acc:HGNC:2976]	ENSG00000130816.16	DNMT1	1786	1.25	6.02	146	1.12e-23	1.95e-22	23
9	2720469	2844095	123627	-	ENSG00000080608	PUM3	protein_coding	chromosome	pumilio RNA binding family member 3 [Source:HGNC Symbol;Acc:HGNC:29676]	ENSG00000080608.10	PUM3	9933	1.74	4.64	146	1.13e-23	1.98e-22	22.9
10	102245532	102382899	137368	+	ENSG00000107862	GBF1	protein_coding	chromosome	golgi brefeldin A resistant guanine nucleotide exchange factor 1 [Source:HGNC Symbol;Acc:HGNC:4181]	ENSG00000107862.4	GBF1	8729	-0.83	6.65	146	1.13e-23	1.97e-22	22.9
8	98117293	98159835	42543	+	ENSG00000104356	POP1	protein_coding	chromosome	POP1 homolog, ribonuclease P/MRP subunit [Source:HGNC Symbol;Acc:HGNC:30129]	ENSG00000104356.11	POP1	10940	1.82	3.1	146	1.14e-23	1.99e-22	22.9
2	219171897	219178106	6210	-	ENSG00000115649	CNPPD1	protein_coding	chromosome	cyclin Pas1/PHO80 domain containing 1 [Source:HGNC Symbol;Acc:HGNC:25220]	ENSG00000115649.16	CNPPD1	27013	-0.944	6.84	146	1.17e-23	2.04e-22	22.9
18	11882622	11908366	25745	-	ENSG00000154889	MPPE1	protein_coding	chromosome	metallophosphoesterase 1 [Source:HGNC Symbol;Acc:HGNC:15988]	ENSG00000154889.17	MPPE1	65258	-1.27	5.13	146	1.19e-23	2.07e-22	22.9
7	104126341	104208047	81707	-	ENSG00000164815	ORC5	protein_coding	chromosome	origin recognition complex subunit 5 [Source:HGNC Symbol;Acc:HGNC:8491]	ENSG00000164815.11	ORC5	5001	1.03	3.31	146	1.19e-23	2.07e-22	22.9
21	42653621	42775509	121889	+	ENSG00000160191	PDE9A	protein_coding	chromosome	phosphodiesterase 9A [Source:HGNC Symbol;Acc:HGNC:8795]	ENSG00000160191.18	PDE9A	5152	-2.81	6.94	146	1.22e-23	2.12e-22	22.9
1	165631213	165661796	30584	+	ENSG00000143198	MGST3	protein_coding	chromosome	microsomal glutathione S-transferase 3 [Source:HGNC Symbol;Acc:HGNC:7064]	ENSG00000143198.13	MGST3	4259	-0.95	6.5	146	1.23e-23	2.14e-22	22.9
1	112701106	112707434	6329	-	ENSG00000155366	RHOC	protein_coding	chromosome	ras homolog family member C [Source:HGNC Symbol;Acc:HGNC:669]	ENSG00000155366.16	RHOC	389	-1.55	9.01	146	1.25e-23	2.16e-22	22.9
17	3662895	3668679	5785	-	ENSG00000213977	TAX1BP3	protein_coding	chromosome	Tax1 binding protein 3 [Source:HGNC Symbol;Acc:HGNC:30684]	ENSG00000213977.8	TAX1BP3	30851	-1.42	7.53	146	1.25e-23	2.16e-22	22.9
12	69359710	69390870	31161	+	ENSG00000127337	YEATS4	protein_coding	chromosome	YEATS domain containing 4 [Source:HGNC Symbol;Acc:HGNC:24859]	ENSG00000127337.7	YEATS4	8089	1.19	2.77	146	1.28e-23	2.21e-22	22.9
3	53088483	53130453	41971	-	ENSG00000163933	RFT1	protein_coding	chromosome	RFT1 homolog [Source:HGNC Symbol;Acc:HGNC:30220]	ENSG00000163933.10	RFT1	91869	1.34	4.11	145	1.33e-23	2.3e-22	22.9
19	34404399	34426168	21770	+	ENSG00000126249	PDCD2L	protein_coding	chromosome	programmed cell death 2 like [Source:HGNC Symbol;Acc:HGNC:28194]	ENSG00000126249.8	PDCD2L	84306	2.19	2.58	145	1.35e-23	2.32e-22	22.9
X	49174802	49186528	11727	-	ENSG00000012211	PRICKLE3	protein_coding	chromosome	prickle planar cell polarity protein 3 [Source:HGNC Symbol;Acc:HGNC:6645]	ENSG00000012211.13	PRICKLE3	4007	1.09	4.03	145	1.36e-23	2.35e-22	22.9
13	41127569	41132802	5234	-	ENSG00000165572	KBTBD6	protein_coding	chromosome	kelch repeat and BTB domain containing 6 [Source:HGNC Symbol;Acc:HGNC:25340]	ENSG00000165572.8	KBTBD6	89890	1.04	2.6	145	1.41e-23	2.42e-22	22.9
6	97142161	97283217	141057	-	ENSG00000146263	MMS22L	protein_coding	chromosome	MMS22 like, DNA repair protein [Source:HGNC Symbol;Acc:HGNC:21475]	ENSG00000146263.11	MMS22L	253714	1.32	3.74	145	1.42e-23	2.44e-22	22.8
13	102765888	102773811	7924	-	ENSG00000151287	TEX30	protein_coding	chromosome	testis expressed 30 [Source:HGNC Symbol;Acc:HGNC:25188]	ENSG00000151287.17	TEX30	93081	1.64	1.66	145	1.43e-23	2.45e-22	22.8
12	117038923	117099479	60557	-	ENSG00000088992	TESC	protein_coding	chromosome	tescalcin [Source:HGNC Symbol;Acc:HGNC:26065]	ENSG00000088992.18	TESC	54997	3.13	4.18	145	1.5e-23	2.58e-22	22.8
7	116672196	116798386	126191	+	ENSG00000105976	MET	protein_coding	chromosome	MET proto-oncogene, receptor tyrosine kinase [Source:HGNC Symbol;Acc:HGNC:7029]	ENSG00000105976.15	MET	4233	1.69	5.68	145	1.53e-23	2.62e-22	22.8
5	177086905	177098144	11240	+	ENSG00000160867	FGFR4	protein_coding	chromosome	fibroblast growth factor receptor 4 [Source:HGNC Symbol;Acc:HGNC:3691]	ENSG00000160867.15	FGFR4	2264	2.05	6.34	145	1.59e-23	2.73e-22	22.8
16	634427	636366	1940	-	ENSG00000130731	METTL26	protein_coding	chromosome	methyltransferase like 26 [Source:HGNC Symbol;Acc:HGNC:14141]	ENSG00000130731.16	METTL26	84326	1.37	5.89	145	1.6e-23	2.75e-22	22.8
12	101280105	101386618	106514	+	ENSG00000120800	UTP20	protein_coding	chromosome	UTP20 small subunit processome component [Source:HGNC Symbol;Acc:HGNC:17897]	ENSG00000120800.5	UTP20	27340	1.46	3.97	145	1.66e-23	2.85e-22	22.8
10	12165330	12196144	30815	-	ENSG00000165609	NUDT5	protein_coding	chromosome	nudix hydrolase 5 [Source:HGNC Symbol;Acc:HGNC:8052]	ENSG00000165609.13	NUDT5	11164	0.928	5.05	144	1.75e-23	2.99e-22	22.8
3	53224712	53256052	31341	-	ENSG00000163931	TKT	protein_coding	chromosome	transketolase [Source:HGNC Symbol;Acc:HGNC:11834]	ENSG00000163931.16	TKT	7086	1.53	7.74	144	1.78e-23	3.04e-22	22.7
19	50466785	50476848	10064	-	ENSG00000142530	FAM71E1	protein_coding	chromosome	family with sequence similarity 71 member E1 [Source:HGNC Symbol;Acc:HGNC:25107]	ENSG00000142530.11	FAM71E1	112703	1.6	0.952	144	1.79e-23	3.04e-22	22.7
19	40222208	40226697	4490	-	ENSG00000105219	CNTD2	protein_coding	chromosome	cyclin N-terminal domain containing 2 [Source:HGNC Symbol;Acc:HGNC:25805]	ENSG00000105219.10	CNTD2	79935	4.63	2.44	144	1.82e-23	3.1e-22	22.7
20	5937228	5950558	13331	-	ENSG00000089195	TRMT6	protein_coding	chromosome	tRNA methyltransferase 6 [Source:HGNC Symbol;Acc:HGNC:20900]	ENSG00000089195.15	TRMT6	51605	1.37	3.65	144	1.83e-23	3.12e-22	22.7
7	128297685	128343908	46224	-	ENSG00000106344	RBM28	protein_coding	chromosome	RNA binding motif protein 28 [Source:HGNC Symbol;Acc:HGNC:21863]	ENSG00000106344.8	RBM28	55131	1.62	4.91	144	1.86e-23	3.16e-22	22.7
22	21628089	21630064	1976	-	ENSG00000161179	YDJC	protein_coding	chromosome	YdjC chitooligosaccharide deacetylase homolog [Source:HGNC Symbol;Acc:HGNC:27158]	ENSG00000161179.13	YDJC	150223	1.27	5.39	144	1.91e-23	3.25e-22	22.7
9	125200542	125234161	33620	+	ENSG00000136933	RABEPK	protein_coding	chromosome	Rab9 effector protein with kelch motifs [Source:HGNC Symbol;Acc:HGNC:16896]	ENSG00000136933.17	RABEPK	10244	1.04	3.95	144	1.96e-23	3.32e-22	22.7
6	33272075	33276511	4437	+	ENSG00000231500	RPS18	protein_coding	chromosome	ribosomal protein S18 [Source:HGNC Symbol;Acc:HGNC:10401]	ENSG00000231500.7	RPS18	6222	1.28	9.81	144	1.96e-23	3.32e-22	22.7
16	23557721	23574389	16669	+	ENSG00000103353	UBFD1	protein_coding	chromosome	ubiquitin family domain containing 1 [Source:HGNC Symbol;Acc:HGNC:30565]	ENSG00000103353.16	UBFD1	56061	1.01	4.99	144	2.08e-23	3.52e-22	22.7
9	107484852	107490482	5631	-	ENSG00000136826	KLF4	protein_coding	chromosome	Kruppel like factor 4 [Source:HGNC Symbol;Acc:HGNC:6348]	ENSG00000136826.15	KLF4	9314	-2.22	8.84	144	2.1e-23	3.54e-22	22.7
6	35452356	35467103	14748	+	ENSG00000112039	FANCE	protein_coding	chromosome	FA complementation group E [Source:HGNC Symbol;Acc:HGNC:3586]	ENSG00000112039.4	FANCE	2178	1.23	2.71	143	2.16e-23	3.65e-22	22.7
22	30693782	30907824	214043	+	ENSG00000184792	OSBP2	protein_coding	chromosome	oxysterol binding protein 2 [Source:HGNC Symbol;Acc:HGNC:8504]	ENSG00000184792.16	OSBP2	23762	1.32	2.59	143	2.21e-23	3.72e-22	22.7
7	2631986	2664802	32817	+	ENSG00000136295	TTYH3	protein_coding	chromosome	tweety family member 3 [Source:HGNC Symbol;Acc:HGNC:22222]	ENSG00000136295.15	TTYH3	80727	1.49	6.94	143	2.22e-23	3.73e-22	22.7
6	37819727	38154624	334898	+	ENSG00000156639	ZFAND3	protein_coding	chromosome	zinc finger AN1-type containing 3 [Source:HGNC Symbol;Acc:HGNC:18019]	ENSG00000156639.12	ZFAND3	60685	-0.745	6.05	143	2.22e-23	3.73e-22	22.7
11	59107185	59127412	20228	+	ENSG00000189057	FAM111B	protein_coding	chromosome	family with sequence similarity 111 member B [Source:HGNC Symbol;Acc:HGNC:24200]	ENSG00000189057.11	FAM111B	374393	2.24	2.89	143	2.23e-23	3.75e-22	22.7
1	9588911	9614877	25967	+	ENSG00000188807	TMEM201	protein_coding	chromosome	transmembrane protein 201 [Source:HGNC Symbol;Acc:HGNC:33719]	ENSG00000188807.13	TMEM201	199953	1.6	3.69	143	2.24e-23	3.77e-22	22.6
11	95089846	95132645	42800	+	ENSG00000149218	ENDOD1	protein_coding	chromosome	endonuclease domain containing 1 [Source:HGNC Symbol;Acc:HGNC:29129]	ENSG00000149218.5	ENDOD1	23052	-1.87	6.34	143	2.28e-23	3.82e-22	22.6
15	68206992	68257211	50220	-	ENSG00000128973	CLN6	protein_coding	chromosome	CLN6 transmembrane ER protein [Source:HGNC Symbol;Acc:HGNC:2077]	ENSG00000128973.13	CLN6	54982	1.05	5.47	143	2.31e-23	3.87e-22	22.6
11	102396332	102470384	74053	-	ENSG00000152558	TMEM123	protein_coding	chromosome	transmembrane protein 123 [Source:HGNC Symbol;Acc:HGNC:30138]	ENSG00000152558.15	TMEM123	114908	1.55	6.78	143	2.31e-23	3.88e-22	22.6
2	27781379	27890681	109303	-	ENSG00000171174	RBKS	protein_coding	chromosome	ribokinase [Source:HGNC Symbol;Acc:HGNC:30325]	ENSG00000171174.15	RBKS	64080	-1.51	2.59	143	2.35e-23	3.93e-22	22.6
3	184561785	184582408	20624	+	ENSG00000182580	EPHB3	protein_coding	chromosome	EPH receptor B3 [Source:HGNC Symbol;Acc:HGNC:3394]	ENSG00000182580.3	EPHB3	2049	2.71	6.12	143	2.37e-23	3.97e-22	22.6
17	78187317	78207701	20385	+	ENSG00000183077	AFMID	protein_coding	chromosome	arylformamidase [Source:HGNC Symbol;Acc:HGNC:20910]	ENSG00000183077.15	AFMID	125061	1.01	4.46	143	2.37e-23	3.97e-22	22.6
8	103371538	103382989	11452	+	ENSG00000164932	CTHRC1	protein_coding	chromosome	collagen triple helix repeat containing 1 [Source:HGNC Symbol;Acc:HGNC:18831]	ENSG00000164932.13	CTHRC1	115908	3.21	3.2	143	2.38e-23	3.98e-22	22.6
19	34994784	35026471	31688	+	ENSG00000089351	GRAMD1A	protein_coding	chromosome	GRAM domain containing 1A [Source:HGNC Symbol;Acc:HGNC:29305]	ENSG00000089351.14	GRAMD1A	57655	1.72	6.34	143	2.41e-23	4.02e-22	22.6
12	120687149	120701859	14711	+	ENSG00000110917	MLEC	protein_coding	chromosome	malectin [Source:HGNC Symbol;Acc:HGNC:28973]	ENSG00000110917.8	MLEC	9761	1.41	7.85	143	2.41e-23	4.01e-22	22.6
5	154887411	154938211	50801	-	ENSG00000082516	GEMIN5	protein_coding	chromosome	gem nuclear organelle associated protein 5 [Source:HGNC Symbol;Acc:HGNC:20043]	ENSG00000082516.9	GEMIN5	25929	1.43	3.59	143	2.42e-23	4.02e-22	22.6
16	11833850	11851580	17731	-	ENSG00000171490	RSL1D1	protein_coding	chromosome	ribosomal L1 domain containing 1 [Source:HGNC Symbol;Acc:HGNC:24534]	ENSG00000171490.13	RSL1D1	26156	1.73	6.34	143	2.44e-23	4.06e-22	22.6
17	3860315	3894891	34577	-	ENSG00000004660	CAMKK1	protein_coding	chromosome	calcium/calmodulin dependent protein kinase kinase 1 [Source:HGNC Symbol;Acc:HGNC:1469]	ENSG00000004660.15	CAMKK1	84254	1.39	4.1	143	2.53e-23	4.2e-22	22.6
6	44000580	44007612	7033	+	ENSG00000181577	C6orf223	protein_coding	chromosome	chromosome 6 open reading frame 223 [Source:HGNC Symbol;Acc:HGNC:28692]	ENSG00000181577.16	C6orf223	NA	3.34	4.53	143	2.54e-23	4.21e-22	22.6
X	101345661	101348742	3082	-	ENSG00000126953	TIMM8A	protein_coding	chromosome	translocase of inner mitochondrial membrane 8A [Source:HGNC Symbol;Acc:HGNC:11817]	ENSG00000126953.8	TIMM8A	1678	1.71	2.48	143	2.64e-23	4.38e-22	22.6
2	113437691	113496204	58514	+	ENSG00000136682	CBWD2	protein_coding	chromosome	COBW domain containing 2 [Source:HGNC Symbol;Acc:HGNC:17907]	ENSG00000136682.15	CBWD2	150472	1.13	3.99	143	2.7e-23	4.47e-22	22.6
2	70281362	70293740	12379	-	ENSG00000143977	SNRPG	protein_coding	chromosome	small nuclear ribonucleoprotein polypeptide G [Source:HGNC Symbol;Acc:HGNC:11163]	ENSG00000143977.14	SNRPG	6637	1.02	4.72	143	2.7e-23	4.46e-22	22.6
17	76734115	76737374	3260	-	ENSG00000161547	SRSF2	protein_coding	chromosome	serine and arginine rich splicing factor 2 [Source:HGNC Symbol;Acc:HGNC:10783]	ENSG00000161547.16	SRSF2	6427	0.774	7.75	142	2.88e-23	4.75e-22	22.5
11	66435075	66466738	31664	-	ENSG00000174547	MRPL11	protein_coding	chromosome	mitochondrial ribosomal protein L11 [Source:HGNC Symbol;Acc:HGNC:14042]	ENSG00000174547.13	MRPL11	65003	1.06	5.09	142	2.89e-23	4.77e-22	22.5
20	33666943	33668525	1583	+	ENSG00000182584	ACTL10	protein_coding	chromosome	actin like 10 [Source:HGNC Symbol;Acc:HGNC:16127]	ENSG00000182584.5	ACTL10	170487	1.61	2.52	142	2.93e-23	4.83e-22	22.5
1	150996086	151008375	12290	-	ENSG00000143409	MINDY1	protein_coding	chromosome	MINDY lysine 48 deubiquitinase 1 [Source:HGNC Symbol;Acc:HGNC:25648]	ENSG00000143409.15	MINDY1	55793	-1.32	4.92	142	2.95e-23	4.86e-22	22.5
7	20134655	20217404	82750	-	ENSG00000183742	MACC1	protein_coding	chromosome	MET transcriptional regulator MACC1 [Source:HGNC Symbol;Acc:HGNC:30215]	ENSG00000183742.13	MACC1	346389	1.45	4.85	142	2.95e-23	4.85e-22	22.5
1	37956975	37990075	33101	-	ENSG00000183431	SF3A3	protein_coding	chromosome	splicing factor 3a subunit 3 [Source:HGNC Symbol;Acc:HGNC:10767]	ENSG00000183431.12	SF3A3	10946	0.981	5.25	142	2.97e-23	4.88e-22	22.5
2	230712842	230821075	108234	+	ENSG00000135932	CAB39	protein_coding	chromosome	calcium binding protein 39 [Source:HGNC Symbol;Acc:HGNC:20292]	ENSG00000135932.11	CAB39	51719	-1.36	6.99	142	2.98e-23	4.89e-22	22.5
3	37052626	37183689	131064	-	ENSG00000093167	LRRFIP2	protein_coding	chromosome	LRR binding FLII interacting protein 2 [Source:HGNC Symbol;Acc:HGNC:6703]	ENSG00000093167.18	LRRFIP2	9209	-1.11	6.12	142	3.01e-23	4.94e-22	22.5
13	30617693	30660770	43078	+	ENSG00000132952	USPL1	protein_coding	chromosome	ubiquitin specific peptidase like 1 [Source:HGNC Symbol;Acc:HGNC:20294]	ENSG00000132952.12	USPL1	10208	1.07	4.27	142	3.05e-23	5e-22	22.5
X	16786432	16844519	58088	+	ENSG00000086712	TXLNG	protein_coding	chromosome	taxilin gamma [Source:HGNC Symbol;Acc:HGNC:18578]	ENSG00000086712.13	TXLNG	55787	1.47	4.35	142	3.2e-23	5.24e-22	22.5
1	9035106	9088478	53373	-	ENSG00000142583	SLC2A5	protein_coding	chromosome	solute carrier family 2 member 5 [Source:HGNC Symbol;Acc:HGNC:11010]	ENSG00000142583.18	SLC2A5	6518	-2.3	3.77	142	3.21e-23	5.24e-22	22.5
17	82314868	82317608	2741	-	ENSG00000173762	CD7	protein_coding	chromosome	CD7 molecule [Source:HGNC Symbol;Acc:HGNC:1695]	ENSG00000173762.8	CD7	924	-2.14	4.32	142	3.21e-23	5.24e-22	22.5
10	93893973	93956062	62090	+	ENSG00000176273	SLC35G1	protein_coding	chromosome	solute carrier family 35 member G1 [Source:HGNC Symbol;Acc:HGNC:26607]	ENSG00000176273.15	SLC35G1	159371	-1.75	3.67	142	3.27e-23	5.33e-22	22.5
12	48995149	48999375	4227	-	ENSG00000181418	DDN	protein_coding	chromosome	dendrin [Source:HGNC Symbol;Acc:HGNC:24458]	ENSG00000181418.8	DDN	23109	3.78	1.05	142	3.31e-23	5.39e-22	22.5
1	212035553	212107400	71848	+	ENSG00000143476	DTL	protein_coding	chromosome	denticleless E3 ubiquitin protein ligase homolog [Source:HGNC Symbol;Acc:HGNC:30288]	ENSG00000143476.18	DTL	51514	2.42	2.85	142	3.36e-23	5.48e-22	22.5
21	33402896	33479348	76453	+	ENSG00000159128	IFNGR2	protein_coding	chromosome	interferon gamma receptor 2 [Source:HGNC Symbol;Acc:HGNC:5440]	ENSG00000159128.14	IFNGR2	3460	-1.32	5.52	142	3.4e-23	5.54e-22	22.5
1	211940399	212035557	95159	-	ENSG00000143493	INTS7	protein_coding	chromosome	integrator complex subunit 7 [Source:HGNC Symbol;Acc:HGNC:24484]	ENSG00000143493.13	INTS7	25896	1.2	3.61	142	3.44e-23	5.6e-22	22.5
CHR_HSCHR5_3_CTG5	177875522	177950732	75211	+	ENSG00000278666	AC106795.4	transcribed_unprocessed_pseudogene	chromosome	THO complex 3 (THOC3) pseudogene	ENSG00000278666.3	AC106795.4	NA	1.61	4.15	142	3.46e-23	5.62e-22	22.5
3	128909866	129002690	92825	-	ENSG00000114656	KIAA1257	protein_coding	chromosome	KIAA1257 [Source:HGNC Symbol;Acc:HGNC:29231]	ENSG00000114656.12	KIAA1257	57501	1.74	2.61	142	3.47e-23	5.63e-22	22.5
6	170575295	170584692	9398	-	ENSG00000071994	PDCD2	protein_coding	chromosome	programmed cell death 2 [Source:HGNC Symbol;Acc:HGNC:8762]	ENSG00000071994.11	PDCD2	5134	0.905	5.12	142	3.52e-23	5.7e-22	22.5
12	51906908	51923361	16454	+	ENSG00000139567	ACVRL1	protein_coding	chromosome	activin A receptor like type 1 [Source:HGNC Symbol;Acc:HGNC:175]	ENSG00000139567.12	ACVRL1	94	-1.75	7.19	142	3.56e-23	5.76e-22	22.4
2	24077433	24085861	8429	-	ENSG00000115129	TP53I3	protein_coding	chromosome	tumor protein p53 inducible protein 3 [Source:HGNC Symbol;Acc:HGNC:19373]	ENSG00000115129.14	TP53I3	9540	-1.61	6.61	141	3.58e-23	5.79e-22	22.4
5	163460203	163491941	31739	+	ENSG00000072571	HMMR	protein_coding	chromosome	hyaluronan mediated motility receptor [Source:HGNC Symbol;Acc:HGNC:5012]	ENSG00000072571.20	HMMR	3161	2.37	2.91	141	3.63e-23	5.87e-22	22.4
6	122471917	122726373	254457	+	ENSG00000135549	PKIB	protein_coding	chromosome	cAMP-dependent protein kinase inhibitor beta [Source:HGNC Symbol;Acc:HGNC:9018]	ENSG00000135549.15	PKIB	5570	-2.64	6.06	141	3.64e-23	5.87e-22	22.4
5	1798385	1801366	2982	-	ENSG00000171421	MRPL36	protein_coding	chromosome	mitochondrial ribosomal protein L36 [Source:HGNC Symbol;Acc:HGNC:14490]	ENSG00000171421.13	MRPL36	64979	1.03	4.02	141	3.76e-23	6.06e-22	22.4
5	103258763	103278660	19898	+	ENSG00000181751	C5orf30	protein_coding	chromosome	chromosome 5 open reading frame 30 [Source:HGNC Symbol;Acc:HGNC:25052]	ENSG00000181751.10	C5orf30	90355	-1.8	5.25	141	3.76e-23	6.06e-22	22.4
3	62398346	62875416	477071	-	ENSG00000163618	CADPS	protein_coding	chromosome	calcium dependent secretion activator [Source:HGNC Symbol;Acc:HGNC:1426]	ENSG00000163618.18	CADPS	8618	2.63	3.17	141	3.77e-23	6.06e-22	22.4
2	47695530	47810101	114572	+	ENSG00000116062	MSH6	protein_coding	chromosome	mutS homolog 6 [Source:HGNC Symbol;Acc:HGNC:7329]	ENSG00000116062.15	MSH6	2956	1.39	4.55	141	3.8e-23	6.1e-22	22.4
12	119685791	119877320	191530	-	ENSG00000122966	CIT	protein_coding	chromosome	citron rho-interacting serine/threonine kinase [Source:HGNC Symbol;Acc:HGNC:1985]	ENSG00000122966.16	CIT	11113	1.92	4.2	141	3.85e-23	6.18e-22	22.4
22	35380361	35394207	13847	+	ENSG00000100292	HMOX1	protein_coding	chromosome	heme oxygenase 1 [Source:HGNC Symbol;Acc:HGNC:5013]	ENSG00000100292.17	HMOX1	3162	-1.96	6.11	141	3.87e-23	6.2e-22	22.4
7	103074881	103099759	24879	+	ENSG00000170632	ARMC10	protein_coding	chromosome	armadillo repeat containing 10 [Source:HGNC Symbol;Acc:HGNC:21706]	ENSG00000170632.14	ARMC10	83787	1.18	4.71	141	3.87e-23	6.2e-22	22.4
1	40979688	41012565	32878	+	ENSG00000171793	CTPS1	protein_coding	chromosome	CTP synthase 1 [Source:HGNC Symbol;Acc:HGNC:2519]	ENSG00000171793.16	CTPS1	1503	1.97	4.5	141	3.88e-23	6.22e-22	22.4
1	211326615	211374946	48332	+	ENSG00000082512	TRAF5	protein_coding	chromosome	TNF receptor associated factor 5 [Source:HGNC Symbol;Acc:HGNC:12035]	ENSG00000082512.15	TRAF5	7188	1.57	5.41	141	3.93e-23	6.3e-22	22.4
4	2269582	2418663	149082	-	ENSG00000159733	ZFYVE28	protein_coding	chromosome	zinc finger FYVE-type containing 28 [Source:HGNC Symbol;Acc:HGNC:29334]	ENSG00000159733.13	ZFYVE28	57732	-1.81	5.65	141	4.01e-23	6.4e-22	22.4
2	98619106	98731132	112027	-	ENSG00000071073	MGAT4A	protein_coding	chromosome	alpha-1,3-mannosyl-glycoprotein 4-beta-N-acetylglucosaminyltransferase A [Source:HGNC Symbol;Acc:HGNC:7047]	ENSG00000071073.13	MGAT4A	11320	-1.44	6.29	141	4.04e-23	6.45e-22	22.4
X	153947557	153971818	24262	-	ENSG00000172534	HCFC1	protein_coding	chromosome	host cell factor C1 [Source:HGNC Symbol;Acc:HGNC:4839]	ENSG00000172534.14	HCFC1	3054	0.833	6.25	141	4.04e-23	6.45e-22	22.4
12	55973913	55996683	22771	+	ENSG00000111540	RAB5B	protein_coding	chromosome	RAB5B, member RAS oncogene family [Source:HGNC Symbol;Acc:HGNC:9784]	ENSG00000111540.16	RAB5B	5869	-0.736	7.15	141	4.06e-23	6.47e-22	22.4
11	119623408	119729200	105793	-	ENSG00000110400	NECTIN1	protein_coding	chromosome	nectin cell adhesion molecule 1 [Source:HGNC Symbol;Acc:HGNC:9706]	ENSG00000110400.11	NECTIN1	5818	1.52	5.41	141	4.1e-23	6.53e-22	22.4
21	44849585	44873903	24319	-	ENSG00000183255	PTTG1IP	protein_coding	chromosome	PTTG1 interacting protein [Source:HGNC Symbol;Acc:HGNC:13524]	ENSG00000183255.12	PTTG1IP	754	-1.32	8.54	141	4.1e-23	6.53e-22	22.4
17	57834781	57850056	15276	-	ENSG00000181610	MRPS23	protein_coding	chromosome	mitochondrial ribosomal protein S23 [Source:HGNC Symbol;Acc:HGNC:14509]	ENSG00000181610.13	MRPS23	51649	1.24	4.17	141	4.11e-23	6.54e-22	22.4
17	76004502	76027452	22951	-	ENSG00000167880	EVPL	protein_coding	chromosome	envoplakin [Source:HGNC Symbol;Acc:HGNC:3503]	ENSG00000167880.7	EVPL	2125	2.24	6.75	141	4.24e-23	6.74e-22	22.4
15	57591904	57685364	93461	+	ENSG00000263155	MYZAP	protein_coding	chromosome	myocardial zonula adherens protein [Source:HGNC Symbol;Acc:HGNC:43444]	ENSG00000263155.6	MYZAP	100820829	-1.75	4.63	141	4.25e-23	6.74e-22	22.4
15	73683966	73714514	30549	+	ENSG00000103855	CD276	protein_coding	chromosome	CD276 molecule [Source:HGNC Symbol;Acc:HGNC:19137]	ENSG00000103855.18	CD276	80381	1.08	5.47	141	4.32e-23	6.85e-22	22.4
X	20124525	20141838	17314	-	ENSG00000173674	EIF1AX	protein_coding	chromosome	eukaryotic translation initiation factor 1A X-linked [Source:HGNC Symbol;Acc:HGNC:3250]	ENSG00000173674.11	EIF1AX	1964	1.37	5.94	141	4.33e-23	6.85e-22	22.4
16	22297375	22335101	37727	+	ENSG00000058600	POLR3E	protein_coding	chromosome	RNA polymerase III subunit E [Source:HGNC Symbol;Acc:HGNC:30347]	ENSG00000058600.16	POLR3E	55718	0.894	5.42	141	4.36e-23	6.89e-22	22.4
20	36573488	36593950	20463	+	ENSG00000118707	TGIF2	protein_coding	chromosome	TGFB induced factor homeobox 2 [Source:HGNC Symbol;Acc:HGNC:15764]	ENSG00000118707.10	TGIF2	60436	1.92	3.88	141	4.39e-23	6.94e-22	22.4
21	32311018	32393012	81995	-	ENSG00000142207	URB1	protein_coding	chromosome	URB1 ribosome biogenesis homolog [Source:HGNC Symbol;Acc:HGNC:17344]	ENSG00000142207.7	URB1	9875	1.83	4.79	141	4.43e-23	7e-22	22.4
5	170861870	171300015	438146	+	ENSG00000204764	RANBP17	protein_coding	chromosome	RAN binding protein 17 [Source:HGNC Symbol;Acc:HGNC:14428]	ENSG00000204764.14	RANBP17	64901	2.08	1.87	141	4.56e-23	7.19e-22	22.3
12	51238724	51271362	32639	+	ENSG00000183283	DAZAP2	protein_coding	chromosome	DAZ associated protein 2 [Source:HGNC Symbol;Acc:HGNC:2684]	ENSG00000183283.16	DAZAP2	9802	-0.933	7.89	140	4.66e-23	7.35e-22	22.3
7	154943687	155003124	59438	-	ENSG00000157212	PAXIP1	protein_coding	chromosome	PAX interacting protein 1 [Source:HGNC Symbol;Acc:HGNC:8624]	ENSG00000157212.19	PAXIP1	22976	0.927	4.14	140	4.71e-23	7.42e-22	22.3
12	109999186	110039763	40578	+	ENSG00000076513	ANKRD13A	protein_coding	chromosome	ankyrin repeat domain 13A [Source:HGNC Symbol;Acc:HGNC:21268]	ENSG00000076513.17	ANKRD13A	88455	-1.03	5.87	140	4.72e-23	7.42e-22	22.3
15	41895933	41972557	76625	-	ENSG00000103966	EHD4	protein_coding	chromosome	EH domain containing 4 [Source:HGNC Symbol;Acc:HGNC:3245]	ENSG00000103966.11	EHD4	30844	-0.961	6.44	140	4.76e-23	7.48e-22	22.3
12	49366584	49527424	160841	+	ENSG00000123352	SPATS2	protein_coding	chromosome	spermatogenesis associated serine rich 2 [Source:HGNC Symbol;Acc:HGNC:18650]	ENSG00000123352.17	SPATS2	65244	0.707	4.42	140	4.91e-23	7.7e-22	22.3
12	56470944	56488414	17471	-	ENSG00000135423	GLS2	protein_coding	chromosome	glutaminase 2 [Source:HGNC Symbol;Acc:HGNC:29570]	ENSG00000135423.13	GLS2	27165	3.03	1.18	140	4.93e-23	7.72e-22	22.3
11	59806140	59810778	4639	-	ENSG00000166902	MRPL16	protein_coding	chromosome	mitochondrial ribosomal protein L16 [Source:HGNC Symbol;Acc:HGNC:14476]	ENSG00000166902.5	MRPL16	54948	0.973	4.86	140	5.02e-23	7.86e-22	22.3
17	2322503	2337507	15005	-	ENSG00000167721	TSR1	protein_coding	chromosome	TSR1 ribosome maturation factor [Source:HGNC Symbol;Acc:HGNC:25542]	ENSG00000167721.10	TSR1	55720	1.51	4.96	140	5.03e-23	7.87e-22	22.3
14	75578620	75663214	84595	+	ENSG00000119686	FLVCR2	protein_coding	chromosome	feline leukemia virus subgroup C cellular receptor family member 2 [Source:HGNC Symbol;Acc:HGNC:20105]	ENSG00000119686.10	FLVCR2	55640	-2.31	4.51	140	5.34e-23	8.35e-22	22.3
11	72285495	72434680	149186	-	ENSG00000162129	CLPB	protein_coding	chromosome	ClpB homolog, mitochondrial AAA ATPase chaperonin [Source:HGNC Symbol;Acc:HGNC:30664]	ENSG00000162129.14	CLPB	81570	1.56	3.98	140	5.4e-23	8.43e-22	22.3
12	9418673	9448229	29557	-	ENSG00000214826	DDX12P	unprocessed_pseudogene	chromosome	DEAD/H-box helicase 12, pseudogene [Source:HGNC Symbol;Acc:HGNC:2737]	ENSG00000214826.5	DDX12P	NA	1.5	2.46	140	5.47e-23	8.53e-22	22.3
2	27381195	27409591	28397	-	ENSG00000115241	PPM1G	protein_coding	chromosome	protein phosphatase, Mg2+/Mn2+ dependent 1G [Source:HGNC Symbol;Acc:HGNC:9278]	ENSG00000115241.11	PPM1G	5496	0.753	6.58	140	5.5e-23	8.58e-22	22.3
15	43185118	43197177	12060	+	ENSG00000166946	CCNDBP1	protein_coding	chromosome	cyclin D1 binding protein 1 [Source:HGNC Symbol;Acc:HGNC:1587]	ENSG00000166946.14	CCNDBP1	23582	-1.08	5.48	140	5.56e-23	8.66e-22	22.3
17	42113111	42121367	8257	-	ENSG00000108773	KAT2A	protein_coding	chromosome	lysine acetyltransferase 2A [Source:HGNC Symbol;Acc:HGNC:4201]	ENSG00000108773.11	KAT2A	2648	1.61	6.48	140	5.63e-23	8.75e-22	22.2
2	161308425	161411717	103293	+	ENSG00000115233	PSMD14	protein_coding	chromosome	proteasome 26S subunit, non-ATPase 14 [Source:HGNC Symbol;Acc:HGNC:16889]	ENSG00000115233.12	PSMD14	10213	0.951	4.81	140	5.64e-23	8.77e-22	22.2
14	69380128	69398299	18172	-	ENSG00000100632	ERH	protein_coding	chromosome	ERH mRNA splicing and mitosis factor [Source:HGNC Symbol;Acc:HGNC:3447]	ENSG00000100632.11	ERH	2079	0.891	5.33	140	5.67e-23	8.8e-22	22.2
1	116574399	116667755	93357	-	ENSG00000143061	IGSF3	protein_coding	chromosome	immunoglobulin superfamily member 3 [Source:HGNC Symbol;Acc:HGNC:5950]	ENSG00000143061.17	IGSF3	3321	-1.7	5.42	140	5.86e-23	9.1e-22	22.2
3	10026414	10101930	75517	+	ENSG00000144554	FANCD2	protein_coding	chromosome	FA complementation group D2 [Source:HGNC Symbol;Acc:HGNC:3585]	ENSG00000144554.10	FANCD2	2177	1.57	3.94	140	5.89e-23	9.12e-22	22.2
7	100706121	100707486	1366	+	ENSG00000172336	POP7	protein_coding	chromosome	POP7 homolog, ribonuclease P/MRP subunit [Source:HGNC Symbol;Acc:HGNC:19949]	ENSG00000172336.5	POP7	10248	0.883	4.44	140	5.91e-23	9.15e-22	22.2
1	2403964	2413797	9834	-	ENSG00000157911	PEX10	protein_coding	chromosome	peroxisomal biogenesis factor 10 [Source:HGNC Symbol;Acc:HGNC:8851]	ENSG00000157911.10	PEX10	5192	0.995	4.21	139	5.96e-23	9.22e-22	22.2
22	46360834	46537170	176337	-	ENSG00000075275	CELSR1	protein_coding	chromosome	cadherin EGF LAG seven-pass G-type receptor 1 [Source:HGNC Symbol;Acc:HGNC:1850]	ENSG00000075275.16	CELSR1	9620	2.01	4.26	139	6.1e-23	9.43e-22	22.2
X	65512582	65534775	22194	-	ENSG00000001497	LAS1L	protein_coding	chromosome	LAS1 like, ribosome biogenesis factor [Source:HGNC Symbol;Acc:HGNC:25726]	ENSG00000001497.16	LAS1L	81887	1.2	5.05	139	6.14e-23	9.49e-22	22.2
2	24491914	24770702	278789	+	ENSG00000084676	NCOA1	protein_coding	chromosome	nuclear receptor coactivator 1 [Source:HGNC Symbol;Acc:HGNC:7668]	ENSG00000084676.15	NCOA1	8648	-1	5.32	139	6.3e-23	9.71e-22	22.2
9	37766978	37801437	34460	-	ENSG00000107371	EXOSC3	protein_coding	chromosome	exosome component 3 [Source:HGNC Symbol;Acc:HGNC:17944]	ENSG00000107371.13	EXOSC3	51010	1.18	3.76	139	6.3e-23	9.71e-22	22.2
3	126988594	127037392	48799	+	ENSG00000114554	PLXNA1	protein_coding	chromosome	plexin A1 [Source:HGNC Symbol;Acc:HGNC:9099]	ENSG00000114554.11	PLXNA1	5361	1.48	6.07	139	6.31e-23	9.72e-22	22.2
1	153561108	153567890	6783	-	ENSG00000196754	S100A2	protein_coding	chromosome	S100 calcium binding protein A2 [Source:HGNC Symbol;Acc:HGNC:10492]	ENSG00000196754.12	S100A2	6273	3.25	1.55	139	6.38e-23	9.82e-22	22.2
1	149937812	150010726	72915	-	ENSG00000264522	OTUD7B	protein_coding	chromosome	OTU deubiquitinase 7B [Source:HGNC Symbol;Acc:HGNC:16683]	ENSG00000264522.6	OTUD7B	56957	-1.11	5.31	139	6.42e-23	9.87e-22	22.2
19	46860997	47005077	144081	+	ENSG00000160007	ARHGAP35	protein_coding	chromosome	Rho GTPase activating protein 35 [Source:HGNC Symbol;Acc:HGNC:4591]	ENSG00000160007.19	ARHGAP35	2909	-1.07	6.67	139	6.46e-23	9.91e-22	22.2
10	133308914	133313162	4249	+	ENSG00000198546	ZNF511	protein_coding	chromosome	zinc finger protein 511 [Source:HGNC Symbol;Acc:HGNC:28445]	ENSG00000198546.15	ZNF511	118472	1.25	5.04	139	6.71e-23	1.03e-21	22.2
14	69611596	69715144	103549	+	ENSG00000100647	SUSD6	protein_coding	chromosome	sushi domain containing 6 [Source:HGNC Symbol;Acc:HGNC:19956]	ENSG00000100647.8	SUSD6	9766	-1.3	6.55	139	6.99e-23	1.07e-21	22.2
X	72578814	72714319	135506	-	ENSG00000067177	PHKA1	protein_coding	chromosome	phosphorylase kinase regulatory subunit alpha 1 [Source:HGNC Symbol;Acc:HGNC:8925]	ENSG00000067177.15	PHKA1	5255	1.93	2.96	139	7.02e-23	1.08e-21	22.2
12	26905181	26938326	33146	-	ENSG00000064102	INTS13	protein_coding	chromosome	integrator complex subunit 13 [Source:HGNC Symbol;Acc:HGNC:20174]	ENSG00000064102.15	INTS13	55726	1.39	3.66	139	7.12e-23	1.09e-21	22.1
1	26826688	26857604	30917	+	ENSG00000204160	ZDHHC18	protein_coding	chromosome	zinc finger DHHC-type containing 18 [Source:HGNC Symbol;Acc:HGNC:20712]	ENSG00000204160.12	ZDHHC18	84243	-0.992	5.4	139	7.29e-23	1.11e-21	22.1
KI270711.1	4612	29626	25015	-	ENSG00000271254	AC240274.1	protein_coding	scaffold	neuroblastoma breakpoint family member 1 [Source:NCBI gene;Acc:102724250]	ENSG00000271254.6	AC240274.1	102724250	-1.84	5.93	138	7.91e-23	1.21e-21	22.1
10	110871795	110900006	28212	+	ENSG00000150593	PDCD4	protein_coding	chromosome	programmed cell death 4 [Source:HGNC Symbol;Acc:HGNC:8763]	ENSG00000150593.18	PDCD4	27250	-2.02	7.76	138	7.95e-23	1.21e-21	22.1
X	23664262	23686397	22136	+	ENSG00000123131	PRDX4	protein_coding	chromosome	peroxiredoxin 4 [Source:HGNC Symbol;Acc:HGNC:17169]	ENSG00000123131.13	PRDX4	10549	1.69	5.33	138	8.03e-23	1.22e-21	22.1
11	74171267	74254703	83437	+	ENSG00000214517	PPME1	protein_coding	chromosome	protein phosphatase methylesterase 1 [Source:HGNC Symbol;Acc:HGNC:30178]	ENSG00000214517.10	PPME1	51400	0.766	4.94	138	8.11e-23	1.24e-21	22.1
17	5440917	5468982	28066	-	ENSG00000005100	DHX33	protein_coding	chromosome	DEAH-box helicase 33 [Source:HGNC Symbol;Acc:HGNC:16718]	ENSG00000005100.13	DHX33	56919	1.02	4.28	138	8.22e-23	1.25e-21	22.1
5	173607145	173616659	9515	-	ENSG00000145919	BOD1	protein_coding	chromosome	biorientation of chromosomes in cell division 1 [Source:HGNC Symbol;Acc:HGNC:25114]	ENSG00000145919.11	BOD1	91272	1.3	4.71	138	8.25e-23	1.25e-21	22.1
1	3625015	3630127	5113	+	ENSG00000158109	TPRG1L	protein_coding	chromosome	tumor protein p63 regulated 1 like [Source:HGNC Symbol;Acc:HGNC:27007]	ENSG00000158109.15	TPRG1L	127262	-1.02	6.56	138	8.35e-23	1.27e-21	22.1
4	139301505	139420033	118529	+	ENSG00000164134	NAA15	protein_coding	chromosome	N(alpha)-acetyltransferase 15, NatA auxiliary subunit [Source:HGNC Symbol;Acc:HGNC:30782]	ENSG00000164134.13	NAA15	80155	1.09	4.55	138	8.58e-23	1.3e-21	22.1
7	141551278	141655244	103967	+	ENSG00000006530	AGK	protein_coding	chromosome	acylglycerol kinase [Source:HGNC Symbol;Acc:HGNC:21869]	ENSG00000006530.18	AGK	55750	0.998	3.95	138	8.65e-23	1.31e-21	22.1
6	37353979	37394734	40756	+	ENSG00000112130	RNF8	protein_coding	chromosome	ring finger protein 8 [Source:HGNC Symbol;Acc:HGNC:10071]	ENSG00000112130.17	RNF8	9025	0.961	3.5	138	8.67e-23	1.31e-21	22.1
12	32106835	32383633	276799	+	ENSG00000151746	BICD1	protein_coding	chromosome	BICD cargo adaptor 1 [Source:HGNC Symbol;Acc:HGNC:1049]	ENSG00000151746.14	BICD1	636	1.8	2.69	138	8.86e-23	1.34e-21	22.1
14	22829879	22835037	5159	+	ENSG00000172590	MRPL52	protein_coding	chromosome	mitochondrial ribosomal protein L52 [Source:HGNC Symbol;Acc:HGNC:16655]	ENSG00000172590.18	MRPL52	122704	0.854	4.96	138	8.9e-23	1.35e-21	22.1
11	102789919	102798160	8242	-	ENSG00000196611	MMP1	protein_coding	chromosome	matrix metallopeptidase 1 [Source:HGNC Symbol;Acc:HGNC:7155]	ENSG00000196611.5	MMP1	4312	4.37	5.89	138	9.05e-23	1.37e-21	22
17	41619442	41624842	5401	-	ENSG00000128422	KRT17	protein_coding	chromosome	keratin 17 [Source:HGNC Symbol;Acc:HGNC:6427]	ENSG00000128422.17	KRT17	3872	4.14	3.26	138	9.22e-23	1.39e-21	22
4	81087370	81215117	127748	-	ENSG00000138669	PRKG2	protein_coding	chromosome	protein kinase cGMP-dependent 2 [Source:HGNC Symbol;Acc:HGNC:9416]	ENSG00000138669.9	PRKG2	5593	-2.88	2.48	138	9.53e-23	1.44e-21	22
1	16562319	16613562	51244	-	ENSG00000219481	NBPF1	protein_coding	chromosome	NBPF member 1 [Source:HGNC Symbol;Acc:HGNC:26088]	ENSG00000219481.10	NBPF1	55672	-1.66	6.09	138	9.54e-23	1.44e-21	22
3	75421552	75435110	13559	-	ENSG00000244026	FAM86DP	transcribed_unprocessed_pseudogene	chromosome	family with sequence similarity 86 member D, pseudogene [Source:HGNC Symbol;Acc:HGNC:32659]	ENSG00000244026.6	FAM86DP	NA	0.957	2.88	138	9.63e-23	1.45e-21	22
6	44254096	44257890	3795	-	ENSG00000157593	SLC35B2	protein_coding	chromosome	solute carrier family 35 member B2 [Source:HGNC Symbol;Acc:HGNC:16872]	ENSG00000157593.19	SLC35B2	347734	1.16	5.56	138	9.71e-23	1.46e-21	22
8	98024851	98046469	21619	-	ENSG00000156482	RPL30	protein_coding	chromosome	ribosomal protein L30 [Source:HGNC Symbol;Acc:HGNC:10333]	ENSG00000156482.11	RPL30	6156	1.18	8.74	138	9.81e-23	1.47e-21	22
4	98470367	98658611	188245	-	ENSG00000168785	TSPAN5	protein_coding	chromosome	tetraspanin 5 [Source:HGNC Symbol;Acc:HGNC:17753]	ENSG00000168785.8	TSPAN5	10098	1.4	3.54	138	9.81e-23	1.47e-21	22
1	52726453	52827336	100884	+	ENSG00000162378	ZYG11B	protein_coding	chromosome	zyg-11 family member B, cell cycle regulator [Source:HGNC Symbol;Acc:HGNC:25820]	ENSG00000162378.13	ZYG11B	79699	-1.05	4.71	138	9.9e-23	1.48e-21	22
16	70252295	70289543	37249	-	ENSG00000090861	AARS	protein_coding	chromosome	alanyl-tRNA synthetase [Source:HGNC Symbol;Acc:HGNC:20]	ENSG00000090861.15	AARS	16	1.28	6.19	137	1e-22	1.5e-21	22
12	6970913	6997428	26516	+	ENSG00000126749	EMG1	protein_coding	chromosome	EMG1 N1-specific pseudouridine methyltransferase [Source:HGNC Symbol;Acc:HGNC:16912]	ENSG00000126749.16	EMG1	10436	0.977	5.14	137	1.01e-22	1.5e-21	22
2	174072447	174248599	176153	-	ENSG00000138430	OLA1	protein_coding	chromosome	Obg like ATPase 1 [Source:HGNC Symbol;Acc:HGNC:28833]	ENSG00000138430.16	OLA1	29789	1.14	5.34	137	1.01e-22	1.51e-21	22
8	73290242	73295789	5548	-	ENSG00000147604	RPL7	protein_coding	chromosome	ribosomal protein L7 [Source:HGNC Symbol;Acc:HGNC:10363]	ENSG00000147604.14	RPL7	6129	1.37	9.55	137	1.02e-22	1.52e-21	22
3	187120948	187180908	59961	-	ENSG00000163923	RPL39L	protein_coding	chromosome	ribosomal protein L39 like [Source:HGNC Symbol;Acc:HGNC:17094]	ENSG00000163923.10	RPL39L	116832	2.2	3.08	137	1.02e-22	1.53e-21	22
7	74082933	74122525	39593	+	ENSG00000106683	LIMK1	protein_coding	chromosome	LIM domain kinase 1 [Source:HGNC Symbol;Acc:HGNC:6613]	ENSG00000106683.15	LIMK1	3984	1.08	5.05	137	1.03e-22	1.54e-21	22
CHR_HSCHR6_MHC_QBL_CTG1	33218133	33227229	9097	+	ENSG00000206283	PFDN6	protein_coding	chromosome	prefoldin subunit 6 [Source:HGNC Symbol;Acc:HGNC:4926]	ENSG00000206283.10	PFDN6	10471	1.04	4.49	137	1.03e-22	1.54e-21	22
9	136945185	136946975	1791	+	ENSG00000176919	C8G	protein_coding	chromosome	complement C8 gamma chain [Source:HGNC Symbol;Acc:HGNC:1354]	ENSG00000176919.13	C8G	733	-2.24	2.49	137	1.04e-22	1.55e-21	22
7	43608456	43729717	121262	-	ENSG00000106603	COA1	protein_coding	chromosome	cytochrome c oxidase assembly factor 1 homolog [Source:HGNC Symbol;Acc:HGNC:21868]	ENSG00000106603.18	COA1	55744	0.992	4.5	137	1.07e-22	1.58e-21	22
16	67657512	67660815	3304	-	ENSG00000102977	ACD	protein_coding	chromosome	ACD shelterin complex subunit and telomerase recruitment factor [Source:HGNC Symbol;Acc:HGNC:25070]	ENSG00000102977.16	ACD	65057	1.07	4.26	137	1.08e-22	1.61e-21	22
21	36699115	36749917	50803	+	ENSG00000159263	SIM2	protein_coding	chromosome	SIM bHLH transcription factor 2 [Source:HGNC Symbol;Acc:HGNC:10883]	ENSG00000159263.16	SIM2	6493	4.04	3.46	137	1.1e-22	1.63e-21	22
3	33798571	33869707	71137	+	ENSG00000170248	PDCD6IP	protein_coding	chromosome	programmed cell death 6 interacting protein [Source:HGNC Symbol;Acc:HGNC:8766]	ENSG00000170248.15	PDCD6IP	10015	-1.15	7.56	137	1.11e-22	1.64e-21	22
17	35713791	35864615	150825	+	ENSG00000270647	TAF15	protein_coding	chromosome	TATA-box binding protein associated factor 15 [Source:HGNC Symbol;Acc:HGNC:11547]	ENSG00000270647.6	TAF15	8148	0.751	6.46	137	1.11e-22	1.64e-21	22
10	101845599	102056193	210595	-	ENSG00000120029	ARMH3	protein_coding	chromosome	armadillo like helical domain containing 3 [Source:HGNC Symbol;Acc:HGNC:25788]	ENSG00000120029.13	ARMH3	79591	-0.58	4.73	137	1.12e-22	1.65e-21	22
16	19701937	19718235	16299	-	ENSG00000103550	KNOP1	protein_coding	chromosome	lysine rich nucleolar protein 1 [Source:HGNC Symbol;Acc:HGNC:34404]	ENSG00000103550.14	KNOP1	400506	1.07	4.66	137	1.13e-22	1.67e-21	21.9
16	5033923	5087379	53457	+	ENSG00000033011	ALG1	protein_coding	chromosome	ALG1 chitobiosyldiphosphodolichol beta-mannosyltransferase [Source:HGNC Symbol;Acc:HGNC:18294]	ENSG00000033011.12	ALG1	56052	1.1	4.8	137	1.15e-22	1.7e-21	21.9
1	44635238	44674481	39244	-	ENSG00000126106	TMEM53	protein_coding	chromosome	transmembrane protein 53 [Source:HGNC Symbol;Acc:HGNC:26186]	ENSG00000126106.14	TMEM53	79639	-1.14	4.57	137	1.16e-22	1.71e-21	21.9
19	55364382	55370463	6082	-	ENSG00000095752	IL11	protein_coding	chromosome	interleukin 11 [Source:HGNC Symbol;Acc:HGNC:5966]	ENSG00000095752.7	IL11	3589	2.95	1.71	137	1.2e-22	1.77e-21	21.9
8	108201216	108435333	234118	-	ENSG00000104408	EIF3E	protein_coding	chromosome	eukaryotic translation initiation factor 3 subunit E [Source:HGNC Symbol;Acc:HGNC:3277]	ENSG00000104408.10	EIF3E	3646	1.35	7.13	137	1.21e-22	1.79e-21	21.9
1	151770107	151791416	21310	-	ENSG00000182134	TDRKH	protein_coding	chromosome	tudor and KH domain containing [Source:HGNC Symbol;Acc:HGNC:11713]	ENSG00000182134.16	TDRKH	11022	1.22	2.55	137	1.22e-22	1.79e-21	21.9
22	29554808	29581327	26520	-	ENSG00000184117	NIPSNAP1	protein_coding	chromosome	nipsnap homolog 1 [Source:HGNC Symbol;Acc:HGNC:7827]	ENSG00000184117.12	NIPSNAP1	8508	1.31	5.35	137	1.24e-22	1.82e-21	21.9
14	19062316	19131167	68852	+	ENSG00000225210	DUXAP9	transcribed_processed_pseudogene	chromosome	double homeobox A pseudogene 9 [Source:HGNC Symbol;Acc:HGNC:32188]	ENSG00000225210.10	DUXAP9	503638	3.12	1.95	137	1.24e-22	1.82e-21	21.9
15	84980440	85139145	158706	+	ENSG00000073417	PDE8A	protein_coding	chromosome	phosphodiesterase 8A [Source:HGNC Symbol;Acc:HGNC:8793]	ENSG00000073417.15	PDE8A	5151	-1.22	6.36	137	1.25e-22	1.84e-21	21.9
9	19375715	19380236	4522	-	ENSG00000137154	RPS6	protein_coding	chromosome	ribosomal protein S6 [Source:HGNC Symbol;Acc:HGNC:10429]	ENSG00000137154.13	RPS6	6194	1.18	10	137	1.27e-22	1.87e-21	21.9
1	201829149	201884291	55143	+	ENSG00000198700	IPO9	protein_coding	chromosome	importin 9 [Source:HGNC Symbol;Acc:HGNC:19425]	ENSG00000198700.10	IPO9	55705	1.3	5.41	137	1.27e-22	1.86e-21	21.9
4	73995642	73998677	3036	-	ENSG00000163735	CXCL5	protein_coding	chromosome	C-X-C motif chemokine ligand 5 [Source:HGNC Symbol;Acc:HGNC:10642]	ENSG00000163735.7	CXCL5	6374	5.49	5.44	136	1.33e-22	1.95e-21	21.9
2	195575977	195737702	161726	+	ENSG00000196950	SLC39A10	protein_coding	chromosome	solute carrier family 39 member 10 [Source:HGNC Symbol;Acc:HGNC:20861]	ENSG00000196950.14	SLC39A10	57181	1.56	3.46	136	1.34e-22	1.96e-21	21.9
X	15235288	15270467	35180	-	ENSG00000102048	ASB9	protein_coding	chromosome	ankyrin repeat and SOCS box containing 9 [Source:HGNC Symbol;Acc:HGNC:17184]	ENSG00000102048.16	ASB9	140462	2.42	1.75	136	1.35e-22	1.98e-21	21.9
11	117900641	117929459	28819	-	ENSG00000137747	TMPRSS13	protein_coding	chromosome	transmembrane serine protease 13 [Source:HGNC Symbol;Acc:HGNC:29808]	ENSG00000137747.16	TMPRSS13	84000	3	2.28	136	1.36e-22	1.98e-21	21.9
20	56392371	56406362	13992	+	ENSG00000101138	CSTF1	protein_coding	chromosome	cleavage stimulation factor subunit 1 [Source:HGNC Symbol;Acc:HGNC:2483]	ENSG00000101138.12	CSTF1	1477	0.923	4.32	136	1.37e-22	1.99e-21	21.9
2	169810081	169824931	14851	-	ENSG00000138382	METTL5	protein_coding	chromosome	methyltransferase like 5 [Source:HGNC Symbol;Acc:HGNC:25006]	ENSG00000138382.15	METTL5	29081	1.01	3.96	136	1.38e-22	2.01e-21	21.9
16	83931311	83966332	35022	+	ENSG00000140961	OSGIN1	protein_coding	chromosome	oxidative stress induced growth inhibitor 1 [Source:HGNC Symbol;Acc:HGNC:30093]	ENSG00000140961.14	OSGIN1	29948	-1.55	3.87	136	1.39e-22	2.03e-21	21.9
1	37681570	37692249	10680	-	ENSG00000116922	C1orf109	protein_coding	chromosome	chromosome 1 open reading frame 109 [Source:HGNC Symbol;Acc:HGNC:26039]	ENSG00000116922.14	C1orf109	54955	1.09	3.14	136	1.41e-22	2.05e-21	21.9
17	80169992	80209331	39340	+	ENSG00000141527	CARD14	protein_coding	chromosome	caspase recruitment domain family member 14 [Source:HGNC Symbol;Acc:HGNC:16446]	ENSG00000141527.18	CARD14	79092	1.41	2.91	136	1.42e-22	2.06e-21	21.8
10	101570560	101609662	39103	+	ENSG00000166171	DPCD	protein_coding	chromosome	deleted in primary ciliary dyskinesia homolog (mouse) [Source:HGNC Symbol;Acc:HGNC:24542]	ENSG00000166171.13	DPCD	25911	1.26	2.92	136	1.42e-22	2.06e-21	21.8
10	43556344	43574618	18275	-	ENSG00000196793	ZNF239	protein_coding	chromosome	zinc finger protein 239 [Source:HGNC Symbol;Acc:HGNC:13031]	ENSG00000196793.13	ZNF239	8187	2.25	2.05	136	1.42e-22	2.06e-21	21.8
18	5392381	5630700	238320	-	ENSG00000082397	EPB41L3	protein_coding	chromosome	erythrocyte membrane protein band 4.1 like 3 [Source:HGNC Symbol;Acc:HGNC:3380]	ENSG00000082397.17	EPB41L3	23136	-2.33	5.75	136	1.47e-22	2.14e-21	21.8
13	23730189	23889400	159212	-	ENSG00000027001	MIPEP	protein_coding	chromosome	mitochondrial intermediate peptidase [Source:HGNC Symbol;Acc:HGNC:7104]	ENSG00000027001.10	MIPEP	4285	1.42	4.13	136	1.48e-22	2.14e-21	21.8
5	6599239	6633291	34053	-	ENSG00000037474	NSUN2	protein_coding	chromosome	NOP2/Sun RNA methyltransferase 2 [Source:HGNC Symbol;Acc:HGNC:25994]	ENSG00000037474.15	NSUN2	54888	0.768	5.87	136	1.48e-22	2.14e-21	21.8
12	57755103	57760411	5309	+	ENSG00000139266	2023-03-09	protein_coding	chromosome	membrane associated ring-CH-type finger 9 [Source:HGNC Symbol;Acc:HGNC:25139]	ENSG00000139266.6	2023-03-09	92979	1.09	4.58	136	1.48e-22	2.15e-21	21.8
17	19377721	19383544	5824	+	ENSG00000166484	MAPK7	protein_coding	chromosome	mitogen-activated protein kinase 7 [Source:HGNC Symbol;Acc:HGNC:6880]	ENSG00000166484.20	MAPK7	5598	-1.39	5.66	136	1.48e-22	2.14e-21	21.8
20	325595	330224	4630	+	ENSG00000177732	SOX12	protein_coding	chromosome	SRY-box transcription factor 12 [Source:HGNC Symbol;Acc:HGNC:11198]	ENSG00000177732.8	SOX12	6666	1.73	4.69	136	1.52e-22	2.19e-21	21.8
16	72008588	72027664	19077	+	ENSG00000102967	DHODH	protein_coding	chromosome	dihydroorotate dehydrogenase (quinone) [Source:HGNC Symbol;Acc:HGNC:2867]	ENSG00000102967.12	DHODH	1723	1.3	3.36	136	1.53e-22	2.21e-21	21.8
12	120127202	120194715	67514	-	ENSG00000089154	GCN1	protein_coding	chromosome	GCN1 activator of EIF2AK4 [Source:HGNC Symbol;Acc:HGNC:4199]	ENSG00000089154.11	GCN1	10985	0.992	6.9	136	1.54e-22	2.22e-21	21.8
12	10604193	10613609	9417	-	ENSG00000111196	MAGOHB	protein_coding	chromosome	mago homolog B, exon junction complex subunit [Source:HGNC Symbol;Acc:HGNC:25504]	ENSG00000111196.10	MAGOHB	55110	1.62	2.65	136	1.61e-22	2.32e-21	21.8
6	7389793	7418037	28245	+	ENSG00000124784	RIOK1	protein_coding	chromosome	RIO kinase 1 [Source:HGNC Symbol;Acc:HGNC:18656]	ENSG00000124784.9	RIOK1	83732	1.09	3.78	136	1.61e-22	2.31e-21	21.8
19	50958631	50969673	11043	-	ENSG00000167755	KLK6	protein_coding	chromosome	kallikrein related peptidase 6 [Source:HGNC Symbol;Acc:HGNC:6367]	ENSG00000167755.15	KLK6	5653	5.76	3.08	136	1.63e-22	2.35e-21	21.8
1	155234452	155244699	10248	-	ENSG00000177628	GBA	protein_coding	chromosome	glucosylceramidase beta [Source:HGNC Symbol;Acc:HGNC:4177]	ENSG00000177628.16	GBA	2629	-1.19	6.2	135	1.68e-22	2.41e-21	21.8
6	113933028	114011308	78281	-	ENSG00000196591	HDAC2	protein_coding	chromosome	histone deacetylase 2 [Source:HGNC Symbol;Acc:HGNC:4853]	ENSG00000196591.12	HDAC2	3066	1.09	5.66	135	1.68e-22	2.41e-21	21.8
9	137554444	137578925	24482	-	ENSG00000148399	DPH7	protein_coding	chromosome	diphthamide biosynthesis 7 [Source:HGNC Symbol;Acc:HGNC:25199]	ENSG00000148399.13	DPH7	92715	0.976	5.05	135	1.73e-22	2.47e-21	21.8
12	120446444	120463749	17306	+	ENSG00000257218	GATC	protein_coding	chromosome	glutamyl-tRNA amidotransferase subunit C [Source:HGNC Symbol;Acc:HGNC:25068]	ENSG00000257218.6	GATC	283459	0.732	4.81	135	1.73e-22	2.47e-21	21.8
3	125082636	125212864	130229	-	ENSG00000221955	SLC12A8	protein_coding	chromosome	solute carrier family 12 member 8 [Source:HGNC Symbol;Acc:HGNC:15595]	ENSG00000221955.10	SLC12A8	84561	1.8	3.32	135	1.79e-22	2.57e-21	21.7
7	100620416	100642779	22364	-	ENSG00000106327	TFR2	protein_coding	chromosome	transferrin receptor 2 [Source:HGNC Symbol;Acc:HGNC:11762]	ENSG00000106327.13	TFR2	7036	2.37	1.9	135	1.82e-22	2.6e-21	21.7
8	140520156	140635633	115478	-	ENSG00000123908	AGO2	protein_coding	chromosome	argonaute RISC catalytic component 2 [Source:HGNC Symbol;Acc:HGNC:3263]	ENSG00000123908.12	AGO2	27161	1.2	5.75	135	1.88e-22	2.68e-21	21.7
3	185476496	185499057	22562	-	ENSG00000163900	TMEM41A	protein_coding	chromosome	transmembrane protein 41A [Source:HGNC Symbol;Acc:HGNC:30544]	ENSG00000163900.11	TMEM41A	90407	1.07	4.33	135	1.88e-22	2.68e-21	21.7
19	3490821	3500940	10120	-	ENSG00000129932	DOHH	protein_coding	chromosome	deoxyhypusine hydroxylase [Source:HGNC Symbol;Acc:HGNC:28662]	ENSG00000129932.9	DOHH	83475	1.02	4.34	135	1.9e-22	2.71e-21	21.7
17	6444441	6451469	7029	+	ENSG00000129195	PIMREG	protein_coding	chromosome	PICALM interacting mitotic regulator [Source:HGNC Symbol;Acc:HGNC:25483]	ENSG00000129195.16	PIMREG	54478	2.37	2.45	135	1.92e-22	2.74e-21	21.7
13	112690329	112887168	196840	+	ENSG00000068650	ATP11A	protein_coding	chromosome	ATPase phospholipid transporting 11A [Source:HGNC Symbol;Acc:HGNC:13552]	ENSG00000068650.18	ATP11A	23250	1.98	5.43	135	1.93e-22	2.74e-21	21.7
X	136909369	137022143	112775	+	ENSG00000234062	AL390879.1	transcribed_unprocessed_pseudogene	chromosome	transmembrane 9 superfamily member 2 (TM9SF2) pseudogene	ENSG00000234062.8	AL390879.1	NA	1.12	2.05	135	1.95e-22	2.77e-21	21.7
12	109088188	109093631	5444	-	ENSG00000189046	ALKBH2	protein_coding	chromosome	alkB homolog 2, alpha-ketoglutarate dependent dioxygenase [Source:HGNC Symbol;Acc:HGNC:32487]	ENSG00000189046.11	ALKBH2	121642	1.61	3.02	135	1.99e-22	2.83e-21	21.7
10	988434	1019932	31499	+	ENSG00000107937	GTPBP4	protein_coding	chromosome	GTP binding protein 4 [Source:HGNC Symbol;Acc:HGNC:21535]	ENSG00000107937.19	GTPBP4	23560	1.53	5.19	135	2.02e-22	2.86e-21	21.7
3	32238679	32370321	131643	+	ENSG00000170293	CMTM8	protein_coding	chromosome	CKLF like MARVEL transmembrane domain containing 8 [Source:HGNC Symbol;Acc:HGNC:19179]	ENSG00000170293.9	CMTM8	152189	1.21	3.18	135	2.02e-22	2.86e-21	21.7
14	76786168	76826246	40079	-	ENSG00000013523	ANGEL1	protein_coding	chromosome	angel homolog 1 [Source:HGNC Symbol;Acc:HGNC:19961]	ENSG00000013523.10	ANGEL1	23357	1.31	4.49	135	2.03e-22	2.88e-21	21.7
1	52927276	53051698	124423	+	ENSG00000116171	SCP2	protein_coding	chromosome	sterol carrier protein 2 [Source:HGNC Symbol;Acc:HGNC:10606]	ENSG00000116171.18	SCP2	6342	-1.08	6.75	135	2.03e-22	2.88e-21	21.7
13	31134973	31162388	27416	-	ENSG00000120694	HSPH1	protein_coding	chromosome	heat shock protein family H (Hsp110) member 1 [Source:HGNC Symbol;Acc:HGNC:16969]	ENSG00000120694.20	HSPH1	10808	2.04	6.43	135	2.04e-22	2.88e-21	21.7
9	97983341	98015943	32603	+	ENSG00000136938	ANP32B	protein_coding	chromosome	acidic nuclear phosphoprotein 32 family member B [Source:HGNC Symbol;Acc:HGNC:16677]	ENSG00000136938.9	ANP32B	10541	0.762	6.87	135	2.06e-22	2.91e-21	21.7
2	46916157	47076137	159981	+	ENSG00000068724	TTC7A	protein_coding	chromosome	tetratricopeptide repeat domain 7A [Source:HGNC Symbol;Acc:HGNC:19750]	ENSG00000068724.17	TTC7A	57217	-1.05	5.89	135	2.09e-22	2.95e-21	21.7
4	153344649	153415118	70470	+	ENSG00000121211	MND1	protein_coding	chromosome	meiotic nuclear divisions 1 [Source:HGNC Symbol;Acc:HGNC:24839]	ENSG00000121211.8	MND1	84057	2.07	1.2	135	2.14e-22	3.02e-21	21.7
19	38930548	38933162	2615	+	ENSG00000128626	MRPS12	protein_coding	chromosome	mitochondrial ribosomal protein S12 [Source:HGNC Symbol;Acc:HGNC:10380]	ENSG00000128626.11	MRPS12	6183	1.33	5.22	135	2.14e-22	3.02e-21	21.7
19	4402640	4445018	42379	+	ENSG00000167670	CHAF1A	protein_coding	chromosome	chromatin assembly factor 1 subunit A [Source:HGNC Symbol;Acc:HGNC:1910]	ENSG00000167670.16	CHAF1A	10036	1.03	4.71	135	2.15e-22	3.03e-21	21.7
20	23350791	23354771	3981	+	ENSG00000132661	NXT1	protein_coding	chromosome	nuclear transport factor 2 like export factor 1 [Source:HGNC Symbol;Acc:HGNC:15913]	ENSG00000132661.4	NXT1	29107	1.69	3.83	135	2.16e-22	3.04e-21	21.7
9	132670035	132694953	24919	+	ENSG00000125484	GTF3C4	protein_coding	chromosome	general transcription factor IIIC subunit 4 [Source:HGNC Symbol;Acc:HGNC:4667]	ENSG00000125484.12	GTF3C4	9329	0.97	4.38	134	2.19e-22	3.08e-21	21.7
2	37201612	37231596	29985	-	ENSG00000115816	CEBPZ	protein_coding	chromosome	CCAAT enhancer binding protein zeta [Source:HGNC Symbol;Acc:HGNC:24218]	ENSG00000115816.15	CEBPZ	10153	1.13	4.63	134	2.2e-22	3.09e-21	21.7
1	84643707	84690803	47097	-	ENSG00000117155	SSX2IP	protein_coding	chromosome	SSX family member 2 interacting protein [Source:HGNC Symbol;Acc:HGNC:16509]	ENSG00000117155.16	SSX2IP	117178	1.58	3.19	134	2.21e-22	3.1e-21	21.7
7	43582758	43650713	67956	+	ENSG00000164543	STK17A	protein_coding	chromosome	serine/threonine kinase 17a [Source:HGNC Symbol;Acc:HGNC:11395]	ENSG00000164543.7	STK17A	9263	-1.09	4.64	134	2.25e-22	3.16e-21	21.6
6	10694972	10709782	14811	+	ENSG00000111845	PAK1IP1	protein_coding	chromosome	PAK1 interacting protein 1 [Source:HGNC Symbol;Acc:HGNC:20882]	ENSG00000111845.5	PAK1IP1	55003	1.53	3.33	134	2.29e-22	3.21e-21	21.6
6	24649979	24666930	16952	-	ENSG00000111802	TDP2	protein_coding	chromosome	tyrosyl-DNA phosphodiesterase 2 [Source:HGNC Symbol;Acc:HGNC:17768]	ENSG00000111802.14	TDP2	51567	-1.94	7.32	134	2.31e-22	3.24e-21	21.6
22	19941607	19969975	28369	+	ENSG00000093010	COMT	protein_coding	chromosome	catechol-O-methyltransferase [Source:HGNC Symbol;Acc:HGNC:2228]	ENSG00000093010.13	COMT	1312	1.4	6.04	134	2.33e-22	3.26e-21	21.6
CHR_HG2030_PATCH	133348366	133351574	3209	+	ENSG00000280858	RPL7A	protein_coding	chromosome	ribosomal protein L7a [Source:HGNC Symbol;Acc:HGNC:10364]	ENSG00000280858.3	RPL7A	6130	1.15	9.84	134	2.38e-22	3.33e-21	21.6
1	155687960	155739010	51051	+	ENSG00000132676	DAP3	protein_coding	chromosome	death associated protein 3 [Source:HGNC Symbol;Acc:HGNC:2673]	ENSG00000132676.16	DAP3	7818	0.826	5.89	134	2.42e-22	3.38e-21	21.6
17	58205437	58219605	14169	-	ENSG00000011143	MKS1	protein_coding	chromosome	MKS transition zone complex subunit 1 [Source:HGNC Symbol;Acc:HGNC:7121]	ENSG00000011143.16	MKS1	54903	0.925	3.3	134	2.43e-22	3.38e-21	21.6
7	44565417	44575051	9635	-	ENSG00000136271	DDX56	protein_coding	chromosome	DEAD-box helicase 56 [Source:HGNC Symbol;Acc:HGNC:18193]	ENSG00000136271.10	DDX56	54606	1.04	6.16	134	2.43e-22	3.38e-21	21.6
9	128305159	128322447	17289	-	ENSG00000167112	TRUB2	protein_coding	chromosome	TruB pseudouridine synthase family member 2 [Source:HGNC Symbol;Acc:HGNC:17170]	ENSG00000167112.10	TRUB2	26995	1.07	4.88	134	2.43e-22	3.38e-21	21.6
17	74748628	74769353	20726	+	ENSG00000109062	SLC9A3R1	protein_coding	chromosome	SLC9A3 regulator 1 [Source:HGNC Symbol;Acc:HGNC:11075]	ENSG00000109062.12	SLC9A3R1	9368	-1.73	8.03	134	2.52e-22	3.5e-21	21.6
3	125528858	125595497	66640	-	ENSG00000144909	OSBPL11	protein_coding	chromosome	oxysterol binding protein like 11 [Source:HGNC Symbol;Acc:HGNC:16397]	ENSG00000144909.8	OSBPL11	114885	-1.1	4.28	134	2.65e-22	3.68e-21	21.6
5	148923639	149063163	139525	-	ENSG00000169247	SH3TC2	protein_coding	chromosome	SH3 domain and tetratricopeptide repeats 2 [Source:HGNC Symbol;Acc:HGNC:29427]	ENSG00000169247.12	SH3TC2	79628	1.75	2.73	134	2.66e-22	3.69e-21	21.6
5	141991749	142013041	21293	-	ENSG00000113552	GNPDA1	protein_coding	chromosome	glucosamine-6-phosphate deaminase 1 [Source:HGNC Symbol;Acc:HGNC:4417]	ENSG00000113552.16	GNPDA1	10007	1.03	4.63	134	2.69e-22	3.73e-21	21.6
2	74198610	74217565	18956	+	ENSG00000065911	MTHFD2	protein_coding	chromosome	methylenetetrahydrofolate dehydrogenase (NADP+ dependent) 2, methenyltetrahydrofolate cyclohydrolase [Source:HGNC Symbol;Acc:HGNC:7434]	ENSG00000065911.12	MTHFD2	10797	1.61	5.09	134	2.78e-22	3.85e-21	21.6
1	218285293	218337983	52691	+	ENSG00000067533	RRP15	protein_coding	chromosome	ribosomal RNA processing 15 homolog [Source:HGNC Symbol;Acc:HGNC:24255]	ENSG00000067533.6	RRP15	51018	1.45	3.26	134	2.78e-22	3.86e-21	21.6
CHR_HG2030_PATCH	133406207	133418244	12038	-	ENSG00000280706	REXO4	protein_coding	chromosome	REX4 homolog, 3'-5' exonuclease [Source:HGNC Symbol;Acc:HGNC:12820]	ENSG00000280706.3	REXO4	57109	0.855	4.89	133	2.83e-22	3.92e-21	21.5
2	71130632	71150101	19470	+	ENSG00000124383	MPHOSPH10	protein_coding	chromosome	M-phase phosphoprotein 10 [Source:HGNC Symbol;Acc:HGNC:7213]	ENSG00000124383.9	MPHOSPH10	10199	0.985	4.14	133	3.07e-22	4.24e-21	21.5
16	23603160	23641310	38151	-	ENSG00000083093	PALB2	protein_coding	chromosome	partner and localizer of BRCA2 [Source:HGNC Symbol;Acc:HGNC:26144]	ENSG00000083093.9	PALB2	79728	1.5	2.99	133	3.18e-22	4.4e-21	21.5
CHR_HSCHR17_4_CTG4	40875941	40885227	9287	-	ENSG00000263057	KRT20	protein_coding	chromosome	keratin 20 [Source:HGNC Symbol;Acc:HGNC:20412]	ENSG00000263057.2	KRT20	54474	-2.71	9.49	133	3.21e-22	4.43e-21	21.5
12	120210439	120265771	55333	-	ENSG00000089159	PXN	protein_coding	chromosome	paxillin [Source:HGNC Symbol;Acc:HGNC:9718]	ENSG00000089159.16	PXN	5829	-0.767	7.84	133	3.23e-22	4.46e-21	21.5
9	4490468	4587469	97002	+	ENSG00000106688	SLC1A1	protein_coding	chromosome	solute carrier family 1 member 1 [Source:HGNC Symbol;Acc:HGNC:10939]	ENSG00000106688.12	SLC1A1	6505	-2.23	5.36	133	3.25e-22	4.49e-21	21.5
12	6328757	6342114	13358	-	ENSG00000067182	TNFRSF1A	protein_coding	chromosome	TNF receptor superfamily member 1A [Source:HGNC Symbol;Acc:HGNC:11916]	ENSG00000067182.7	TNFRSF1A	7132	-1.04	7.51	133	3.28e-22	4.52e-21	21.5
11	65116403	65117701	1299	-	ENSG00000174276	ZNHIT2	protein_coding	chromosome	zinc finger HIT-type containing 2 [Source:HGNC Symbol;Acc:HGNC:1177]	ENSG00000174276.7	ZNHIT2	741	1.19	3.83	133	3.29e-22	4.52e-21	21.5
7	42932376	42948958	16583	+	ENSG00000106591	MRPL32	protein_coding	chromosome	mitochondrial ribosomal protein L32 [Source:HGNC Symbol;Acc:HGNC:14035]	ENSG00000106591.4	MRPL32	64983	0.905	4.56	133	3.35e-22	4.6e-21	21.5
15	67063763	67195169	131407	+	ENSG00000166949	SMAD3	protein_coding	chromosome	SMAD family member 3 [Source:HGNC Symbol;Acc:HGNC:6769]	ENSG00000166949.16	SMAD3	4088	-1.24	6.27	133	3.39e-22	4.65e-21	21.5
15	40439721	40468236	28516	+	ENSG00000140320	BAHD1	protein_coding	chromosome	bromo adjacent homology domain containing 1 [Source:HGNC Symbol;Acc:HGNC:29153]	ENSG00000140320.12	BAHD1	22893	-0.857	5.43	133	3.41e-22	4.68e-21	21.5
10	102152176	102163871	11696	+	ENSG00000166197	NOLC1	protein_coding	chromosome	nucleolar and coiled-body phosphoprotein 1 [Source:HGNC Symbol;Acc:HGNC:15608]	ENSG00000166197.16	NOLC1	9221	1.76	6.14	133	3.41e-22	4.68e-21	21.5
4	163494442	163520539	26098	+	ENSG00000198498	TMA16	protein_coding	chromosome	translation machinery associated 16 homolog [Source:HGNC Symbol;Acc:HGNC:25638]	ENSG00000198498.10	TMA16	55319	1.22	2.85	133	3.43e-22	4.71e-21	21.5
11	118193725	118225094	31370	-	ENSG00000160593	JAML	protein_coding	chromosome	junction adhesion molecule like [Source:HGNC Symbol;Acc:HGNC:19084]	ENSG00000160593.19	JAML	120425	-1.54	4.21	133	3.45e-22	4.73e-21	21.5
8	27311482	27459391	147910	+	ENSG00000120899	PTK2B	protein_coding	chromosome	protein tyrosine kinase 2 beta [Source:HGNC Symbol;Acc:HGNC:9612]	ENSG00000120899.18	PTK2B	2185	-1.46	6.93	133	3.46e-22	4.74e-21	21.5
1	111755245	111768000	12756	+	ENSG00000064703	DDX20	protein_coding	chromosome	DEAD-box helicase 20 [Source:HGNC Symbol;Acc:HGNC:2743]	ENSG00000064703.12	DDX20	11218	1.1	3.19	133	3.47e-22	4.75e-21	21.5
2	68157888	68176238	18351	+	ENSG00000115946	PNO1	protein_coding	chromosome	partner of NOB1 homolog [Source:HGNC Symbol;Acc:HGNC:32790]	ENSG00000115946.8	PNO1	56902	1.59	3.68	133	3.51e-22	4.8e-21	21.5
17	37084992	37406836	321845	-	ENSG00000278540	ACACA	protein_coding	chromosome	acetyl-CoA carboxylase alpha [Source:HGNC Symbol;Acc:HGNC:84]	ENSG00000278540.5	ACACA	31	1.39	4.98	133	3.53e-22	4.82e-21	21.5
16	84271	138860	54590	-	ENSG00000103148	NPRL3	protein_coding	chromosome	NPR3 like, GATOR1 complex subunit [Source:HGNC Symbol;Acc:HGNC:14124]	ENSG00000103148.16	NPRL3	8131	1.26	4.93	133	3.64e-22	4.97e-21	21.4
1	46557408	46616843	59436	-	ENSG00000079277	MKNK1	protein_coding	chromosome	MAPK interacting serine/threonine kinase 1 [Source:HGNC Symbol;Acc:HGNC:7110]	ENSG00000079277.21	MKNK1	8569	-0.864	5.57	132	3.66e-22	4.99e-21	21.4
15	64963022	64990310	27289	-	ENSG00000090487	SPG21	protein_coding	chromosome	SPG21 abhydrolase domain containing, maspardin [Source:HGNC Symbol;Acc:HGNC:20373]	ENSG00000090487.11	SPG21	51324	0.658	5.51	132	3.77e-22	5.14e-21	21.4
22	35400134	35425431	25298	+	ENSG00000100297	MCM5	protein_coding	chromosome	minichromosome maintenance complex component 5 [Source:HGNC Symbol;Acc:HGNC:6948]	ENSG00000100297.16	MCM5	4174	1.24	5.43	132	3.78e-22	5.14e-21	21.4
17	65100812	65227703	126892	+	ENSG00000108370	RGS9	protein_coding	chromosome	regulator of G protein signaling 9 [Source:HGNC Symbol;Acc:HGNC:10004]	ENSG00000108370.17	RGS9	8787	-1.63	2.84	132	3.88e-22	5.27e-21	21.4
17	74924275	74933912	9638	+	ENSG00000183034	OTOP2	protein_coding	chromosome	otopetrin 2 [Source:HGNC Symbol;Acc:HGNC:19657]	ENSG00000183034.12	OTOP2	92736	-4.95	6.6	132	3.88e-22	5.27e-21	21.4
10	94333226	94362959	29734	-	ENSG00000173145	NOC3L	protein_coding	chromosome	NOC3 like DNA replication regulator [Source:HGNC Symbol;Acc:HGNC:24034]	ENSG00000173145.11	NOC3L	64318	1.51	2.99	132	3.9e-22	5.3e-21	21.4
16	71859680	71895336	35657	-	ENSG00000102984	ZNF821	protein_coding	chromosome	zinc finger protein 821 [Source:HGNC Symbol;Acc:HGNC:28043]	ENSG00000102984.15	ZNF821	55565	-1.47	3.75	132	3.94e-22	5.34e-21	21.4
1	16197854	16212652	14799	-	ENSG00000142632	ARHGEF19	protein_coding	chromosome	Rho guanine nucleotide exchange factor 19 [Source:HGNC Symbol;Acc:HGNC:26604]	ENSG00000142632.17	ARHGEF19	128272	1.4	3.86	132	4.09e-22	5.54e-21	21.4
1	55039548	55064852	25305	+	ENSG00000169174	PCSK9	protein_coding	chromosome	proprotein convertase subtilisin/kexin type 9 [Source:HGNC Symbol;Acc:HGNC:20001]	ENSG00000169174.10	PCSK9	255738	3.09	5.33	132	4.12e-22	5.58e-21	21.4
19	43543040	43580473	37434	-	ENSG00000073050	XRCC1	protein_coding	chromosome	X-ray repair cross complementing 1 [Source:HGNC Symbol;Acc:HGNC:12828]	ENSG00000073050.11	XRCC1	7515	0.747	4.69	132	4.16e-22	5.63e-21	21.4
12	122752824	122771064	18241	+	ENSG00000139726	DENR	protein_coding	chromosome	density regulated re-initiation and release factor [Source:HGNC Symbol;Acc:HGNC:2769]	ENSG00000139726.11	DENR	8562	0.569	5.21	132	4.17e-22	5.63e-21	21.4
19	50329653	50383388	53736	+	ENSG00000131408	NR1H2	protein_coding	chromosome	nuclear receptor subfamily 1 group H member 2 [Source:HGNC Symbol;Acc:HGNC:7965]	ENSG00000131408.15	NR1H2	7376	-0.812	6.6	132	4.27e-22	5.77e-21	21.4
16	57610652	57665580	54929	+	ENSG00000205336	ADGRG1	protein_coding	chromosome	adhesion G protein-coupled receptor G1 [Source:HGNC Symbol;Acc:HGNC:4512]	ENSG00000205336.12	ADGRG1	9289	1.35	6.71	132	4.3e-22	5.81e-21	21.4
1	37566816	37595937	29122	-	ENSG00000134697	GNL2	protein_coding	chromosome	G protein nucleolar 2 [Source:HGNC Symbol;Acc:HGNC:29925]	ENSG00000134697.13	GNL2	29889	0.842	5.22	132	4.34e-22	5.86e-21	21.4
6	143843338	143863812	20475	+	ENSG00000135521	LTV1	protein_coding	chromosome	LTV1 ribosome biogenesis factor [Source:HGNC Symbol;Acc:HGNC:21173]	ENSG00000135521.9	LTV1	84946	1.34	3.92	132	4.36e-22	5.87e-21	21.4
15	43870761	44195271	324511	-	ENSG00000171877	FRMD5	protein_coding	chromosome	FERM domain containing 5 [Source:HGNC Symbol;Acc:HGNC:28214]	ENSG00000171877.21	FRMD5	84978	2.35	1.58	132	4.36e-22	5.87e-21	21.4
1	174999163	175012027	12865	+	ENSG00000116161	CACYBP	protein_coding	chromosome	calcyclin binding protein [Source:HGNC Symbol;Acc:HGNC:30423]	ENSG00000116161.18	CACYBP	27101	1.12	5.06	132	4.5e-22	6.05e-21	21.3
15	66504959	66550130	45172	+	ENSG00000174442	ZWILCH	protein_coding	chromosome	zwilch kinetochore protein [Source:HGNC Symbol;Acc:HGNC:25468]	ENSG00000174442.12	ZWILCH	55055	1.3	3.24	131	4.77e-22	6.41e-21	21.3
5	55231152	55233608	2457	-	ENSG00000152669	CCNO	protein_coding	chromosome	cyclin O [Source:HGNC Symbol;Acc:HGNC:18576]	ENSG00000152669.9	CCNO	10309	2.51	3.22	131	4.82e-22	6.47e-21	21.3
10	70882280	70888565	6286	-	ENSG00000166228	PCBD1	protein_coding	chromosome	pterin-4 alpha-carbinolamine dehydratase 1 [Source:HGNC Symbol;Acc:HGNC:8646]	ENSG00000166228.9	PCBD1	5092	0.98	5.57	131	4.84e-22	6.5e-21	21.3
6	36740775	36839444	98670	-	ENSG00000124772	CPNE5	protein_coding	chromosome	copine 5 [Source:HGNC Symbol;Acc:HGNC:2318]	ENSG00000124772.12	CPNE5	57699	-1.88	4.01	131	4.86e-22	6.52e-21	21.3
5	1008802	1038943	30142	+	ENSG00000145506	NKD2	protein_coding	chromosome	NKD inhibitor of WNT signaling pathway 2 [Source:HGNC Symbol;Acc:HGNC:17046]	ENSG00000145506.14	NKD2	85409	3.3	4.45	131	4.94e-22	6.61e-21	21.3
14	58408495	58427531	19037	-	ENSG00000100575	TIMM9	protein_coding	chromosome	translocase of inner mitochondrial membrane 9 [Source:HGNC Symbol;Acc:HGNC:11819]	ENSG00000100575.14	TIMM9	26520	1.29	3.07	131	4.95e-22	6.63e-21	21.3
15	75463251	75579315	116065	-	ENSG00000169410	PTPN9	protein_coding	chromosome	protein tyrosine phosphatase non-receptor type 9 [Source:HGNC Symbol;Acc:HGNC:9661]	ENSG00000169410.10	PTPN9	5780	-0.844	5.49	131	4.96e-22	6.64e-21	21.3
12	43718993	43758817	39825	-	ENSG00000129317	PUS7L	protein_coding	chromosome	pseudouridine synthase 7 like [Source:HGNC Symbol;Acc:HGNC:25276]	ENSG00000129317.14	PUS7L	83448	1.33	3.49	131	5.26e-22	7.03e-21	21.3
2	75469302	75569722	100421	-	ENSG00000115363	EVA1A	protein_coding	chromosome	eva-1 homolog A, regulator of programmed cell death [Source:HGNC Symbol;Acc:HGNC:25816]	ENSG00000115363.14	EVA1A	84141	2.66	1.82	131	5.29e-22	7.06e-21	21.3
8	37695782	37700019	4238	+	ENSG00000183779	ZNF703	protein_coding	chromosome	zinc finger protein 703 [Source:HGNC Symbol;Acc:HGNC:25883]	ENSG00000183779.7	ZNF703	80139	1.6	7.24	131	5.3e-22	7.07e-21	21.3
1	966482	975865	9384	+	ENSG00000187583	PLEKHN1	protein_coding	chromosome	pleckstrin homology domain containing N1 [Source:HGNC Symbol;Acc:HGNC:25284]	ENSG00000187583.11	PLEKHN1	84069	2.38	2.73	131	5.37e-22	7.16e-21	21.3
1	67701475	67833467	131993	-	ENSG00000172380	GNG12	protein_coding	chromosome	G protein subunit gamma 12 [Source:HGNC Symbol;Acc:HGNC:19663]	ENSG00000172380.6	GNG12	55970	-1.29	6.65	131	5.43e-22	7.23e-21	21.3
4	47847233	47914667	67435	-	ENSG00000170448	NFXL1	protein_coding	chromosome	nuclear transcription factor, X-box binding like 1 [Source:HGNC Symbol;Acc:HGNC:18726]	ENSG00000170448.12	NFXL1	152518	1.35	3.06	131	5.44e-22	7.23e-21	21.3
19	4838341	4867694	29354	-	ENSG00000105355	PLIN3	protein_coding	chromosome	perilipin 3 [Source:HGNC Symbol;Acc:HGNC:16893]	ENSG00000105355.9	PLIN3	10226	-1.31	6.83	131	5.5e-22	7.31e-21	21.3
11	3797724	3826371	28648	+	ENSG00000148985	PGAP2	protein_coding	chromosome	post-GPI attachment to proteins 2 [Source:HGNC Symbol;Acc:HGNC:17893]	ENSG00000148985.20	PGAP2	27315	0.971	4.24	131	5.65e-22	7.5e-21	21.2
2	61477849	61538626	60778	-	ENSG00000082898	XPO1	protein_coding	chromosome	exportin 1 [Source:HGNC Symbol;Acc:HGNC:12825]	ENSG00000082898.17	XPO1	7514	0.731	6.39	131	5.66e-22	7.52e-21	21.2
5	174724582	174730896	6315	+	ENSG00000120149	MSX2	protein_coding	chromosome	msh homeobox 2 [Source:HGNC Symbol;Acc:HGNC:7392]	ENSG00000120149.9	MSX2	4488	3.91	2.32	131	5.69e-22	7.54e-21	21.2
22	35299275	35347992	48718	+	ENSG00000100284	TOM1	protein_coding	chromosome	target of myb1 membrane trafficking protein [Source:HGNC Symbol;Acc:HGNC:11982]	ENSG00000100284.21	TOM1	10043	-0.906	6.19	131	5.86e-22	7.76e-21	21.2
13	45120510	45284893	164384	+	ENSG00000188342	GTF2F2	protein_coding	chromosome	general transcription factor IIF subunit 2 [Source:HGNC Symbol;Acc:HGNC:4653]	ENSG00000188342.12	GTF2F2	2963	1.18	4.31	131	5.86e-22	7.76e-21	21.2
X	130401987	130413656	11670	+	ENSG00000134597	RBMX2	protein_coding	chromosome	RNA binding motif protein X-linked 2 [Source:HGNC Symbol;Acc:HGNC:24282]	ENSG00000134597.16	RBMX2	51634	0.859	3.77	131	5.89e-22	7.8e-21	21.2
15	89834308	89912882	78575	-	ENSG00000250021	ARPIN-AP3S2	protein_coding	chromosome	ARPIN-AP3S2 readthrough [Source:HGNC Symbol;Acc:HGNC:38824]	ENSG00000250021.7	ARPIN-AP3S2	100526783	-1.06	4.73	131	6e-22	7.93e-21	21.2
1	241847967	241895148	47182	+	ENSG00000174371	EXO1	protein_coding	chromosome	exonuclease 1 [Source:HGNC Symbol;Acc:HGNC:3511]	ENSG00000174371.17	EXO1	9156	2.38	2.24	131	6.04e-22	7.98e-21	21.2
10	125823546	125853695	30150	+	ENSG00000107949	BCCIP	protein_coding	chromosome	BRCA2 and CDKN1A interacting protein [Source:HGNC Symbol;Acc:HGNC:978]	ENSG00000107949.17	BCCIP	56647	1.03	4.66	130	6.35e-22	8.38e-21	21.2
14	22871740	22881713	9974	+	ENSG00000197324	LRP10	protein_coding	chromosome	LDL receptor related protein 10 [Source:HGNC Symbol;Acc:HGNC:14553]	ENSG00000197324.9	LRP10	26020	-1.45	8.63	130	6.43e-22	8.48e-21	21.2
1	231363751	231422287	58537	-	ENSG00000135766	EGLN1	protein_coding	chromosome	egl-9 family hypoxia inducible factor 1 [Source:HGNC Symbol;Acc:HGNC:1232]	ENSG00000135766.9	EGLN1	54583	-1.07	5.95	130	6.44e-22	8.49e-21	21.2
18	12407896	12432238	24343	+	ENSG00000141391	PRELID3A	protein_coding	chromosome	PRELI domain containing 3A [Source:HGNC Symbol;Acc:HGNC:24639]	ENSG00000141391.14	PRELID3A	10650	1.68	1.83	130	6.48e-22	8.52e-21	21.2
5	40825262	40835222	9961	-	ENSG00000145592	RPL37	protein_coding	chromosome	ribosomal protein L37 [Source:HGNC Symbol;Acc:HGNC:10347]	ENSG00000145592.14	RPL37	6167	1.01	8.72	130	6.48e-22	8.52e-21	21.2
8	29067278	29263124	195847	-	ENSG00000197892	KIF13B	protein_coding	chromosome	kinesin family member 13B [Source:HGNC Symbol;Acc:HGNC:14405]	ENSG00000197892.13	KIF13B	23303	-1.35	7.24	130	6.5e-22	8.55e-21	21.2
2	96760902	96811874	50973	+	ENSG00000158158	CNNM4	protein_coding	chromosome	cyclin and CBS domain divalent metal cation transport mediator 4 [Source:HGNC Symbol;Acc:HGNC:105]	ENSG00000158158.12	CNNM4	26504	-1.81	7.2	130	6.75e-22	8.86e-21	21.2
1	53765478	53838463	72986	-	ENSG00000058804	NDC1	protein_coding	chromosome	NDC1 transmembrane nucleoporin [Source:HGNC Symbol;Acc:HGNC:25525]	ENSG00000058804.12	NDC1	55706	1.73	4.22	130	6.95e-22	9.13e-21	21.2
1	24319322	24364482	45161	+	ENSG00000158055	GRHL3	protein_coding	chromosome	grainyhead like transcription factor 3 [Source:HGNC Symbol;Acc:HGNC:25839]	ENSG00000158055.15	GRHL3	57822	3.22	1.41	130	7.01e-22	9.2e-21	21.2
17	57255851	57684689	428839	+	ENSG00000153944	MSI2	protein_coding	chromosome	musashi RNA binding protein 2 [Source:HGNC Symbol;Acc:HGNC:18585]	ENSG00000153944.11	MSI2	124540	0.931	5.39	130	7.07e-22	9.26e-21	21.2
1	32775237	32818153	42917	-	ENSG00000134684	YARS	protein_coding	chromosome	tyrosyl-tRNA synthetase [Source:HGNC Symbol;Acc:HGNC:12840]	ENSG00000134684.10	YARS	8565	1.08	5.7	130	7.36e-22	9.63e-21	21.1
9	74980790	75028423	47634	-	ENSG00000156017	CARNMT1	protein_coding	chromosome	carnosine N-methyltransferase 1 [Source:HGNC Symbol;Acc:HGNC:23435]	ENSG00000156017.13	CARNMT1	138199	1.26	3.33	130	7.39e-22	9.68e-21	21.1
17	82057506	82065887	8382	-	ENSG00000169718	DUS1L	protein_coding	chromosome	dihydrouridine synthase 1 like [Source:HGNC Symbol;Acc:HGNC:30086]	ENSG00000169718.18	DUS1L	64118	1.03	7.43	130	7.41e-22	9.69e-21	21.1
16	1308880	1327018	18139	+	ENSG00000103275	UBE2I	protein_coding	chromosome	ubiquitin conjugating enzyme E2 I [Source:HGNC Symbol;Acc:HGNC:12485]	ENSG00000103275.20	UBE2I	7329	0.731	6.39	130	7.72e-22	1.01e-20	21.1
4	6663396	6676755	13360	+	ENSG00000170846	AC093323.1	protein_coding	chromosome	Putative MORF4 family-associated protein 1-like protein UPP [Source:UniProtKB/Swiss-Prot;Acc:B2RBV5]	ENSG00000170846.17	AC093323.1	NA	1.08	3.92	129	8.18e-22	1.07e-20	21.1
15	40161023	40221136	60114	+	ENSG00000156970	BUB1B	protein_coding	chromosome	BUB1 mitotic checkpoint serine/threonine kinase B [Source:HGNC Symbol;Acc:HGNC:1149]	ENSG00000156970.12	BUB1B	701	2.36	3.59	129	8.27e-22	1.08e-20	21.1
12	55720367	55724705	4339	+	ENSG00000135437	RDH5	protein_coding	chromosome	retinol dehydrogenase 5 [Source:HGNC Symbol;Acc:HGNC:9940]	ENSG00000135437.9	RDH5	5959	-1.58	4.46	129	8.3e-22	1.08e-20	21.1
12	9277235	9313241	36007	+	ENSG00000111788	AC009533.1	unprocessed_pseudogene	chromosome	DEAD/H (Asp-Glu-Ala-Asp/His) box polypeptide like pseudogene	ENSG00000111788.10	AC009533.1	NA	1.41	3.52	129	8.31e-22	1.08e-20	21.1
11	66848417	66958386	109970	-	ENSG00000173599	PC	protein_coding	chromosome	pyruvate carboxylase [Source:HGNC Symbol;Acc:HGNC:8636]	ENSG00000173599.15	PC	5091	-1.9	5.55	129	8.52e-22	1.11e-20	21.1
3	47802909	47850195	47287	+	ENSG00000132153	DHX30	protein_coding	chromosome	DExH-box helicase 30 [Source:HGNC Symbol;Acc:HGNC:16716]	ENSG00000132153.15	DHX30	22907	0.8	6.17	129	8.56e-22	1.11e-20	21.1
14	72926377	72959703	33327	+	ENSG00000119599	DCAF4	protein_coding	chromosome	DDB1 and CUL4 associated factor 4 [Source:HGNC Symbol;Acc:HGNC:20229]	ENSG00000119599.17	DCAF4	26094	0.959	3.67	129	8.64e-22	1.12e-20	21.1
12	92140278	92145846	5569	-	ENSG00000133639	BTG1	protein_coding	chromosome	BTG anti-proliferation factor 1 [Source:HGNC Symbol;Acc:HGNC:1130]	ENSG00000133639.5	BTG1	694	-1.14	7.03	129	8.65e-22	1.12e-20	21.1
7	98106862	98209638	102777	+	ENSG00000164715	LMTK2	protein_coding	chromosome	lemur tyrosine kinase 2 [Source:HGNC Symbol;Acc:HGNC:17880]	ENSG00000164715.6	LMTK2	22853	-1.4	6.48	129	8.7e-22	1.13e-20	21.1
6	26055787	26056428	642	-	ENSG00000187837	HIST1H1C	protein_coding	chromosome	histone cluster 1 H1 family member c [Source:HGNC Symbol;Acc:HGNC:4716]	ENSG00000187837.3	HIST1H1C	3006	-2.46	6.15	129	8.85e-22	1.15e-20	21.1
7	128392277	128410252	17976	-	ENSG00000106348	IMPDH1	protein_coding	chromosome	inosine monophosphate dehydrogenase 1 [Source:HGNC Symbol;Acc:HGNC:6052]	ENSG00000106348.18	IMPDH1	3614	1.8	6.02	129	9.06e-22	1.17e-20	21
1	154220179	154271510	51332	+	ENSG00000143569	UBAP2L	protein_coding	chromosome	ubiquitin associated protein 2 like [Source:HGNC Symbol;Acc:HGNC:29877]	ENSG00000143569.19	UBAP2L	9898	0.749	6.33	129	9.1e-22	1.18e-20	21
12	112026689	112108796	82108	-	ENSG00000111300	NAA25	protein_coding	chromosome	N(alpha)-acetyltransferase 25, NatB auxiliary subunit [Source:HGNC Symbol;Acc:HGNC:25783]	ENSG00000111300.10	NAA25	80018	0.791	4.32	129	9.15e-22	1.18e-20	21
19	51022216	51028039	5824	-	ENSG00000167757	KLK11	protein_coding	chromosome	kallikrein related peptidase 11 [Source:HGNC Symbol;Acc:HGNC:6359]	ENSG00000167757.14	KLK11	11012	3.53	2.27	129	9.21e-22	1.19e-20	21
7	123681943	123749003	67061	-	ENSG00000106299	WASL	protein_coding	chromosome	WASP like actin nucleation promoting factor [Source:HGNC Symbol;Acc:HGNC:12735]	ENSG00000106299.8	WASL	8976	-1.32	6.3	129	9.36e-22	1.21e-20	21
20	20017310	20033655	16346	+	ENSG00000173418	NAA20	protein_coding	chromosome	N(alpha)-acetyltransferase 20, NatB catalytic subunit [Source:HGNC Symbol;Acc:HGNC:15908]	ENSG00000173418.12	NAA20	51126	1.02	4.82	129	9.36e-22	1.21e-20	21
17	82321024	82334074	13051	-	ENSG00000141574	SECTM1	protein_coding	chromosome	secreted and transmembrane 1 [Source:HGNC Symbol;Acc:HGNC:10707]	ENSG00000141574.8	SECTM1	6398	-2.98	7.52	129	9.51e-22	1.23e-20	21
22	46684410	46738252	53843	-	ENSG00000100422	CERK	protein_coding	chromosome	ceramide kinase [Source:HGNC Symbol;Acc:HGNC:19256]	ENSG00000100422.14	CERK	64781	-1.15	5.92	129	9.53e-22	1.23e-20	21
2	171999943	172082430	82488	+	ENSG00000172878	METAP1D	protein_coding	chromosome	methionyl aminopeptidase type 1D, mitochondrial [Source:HGNC Symbol;Acc:HGNC:32583]	ENSG00000172878.14	METAP1D	254042	1.51	3.18	129	9.58e-22	1.23e-20	21
15	40351033	40356434	5402	+	ENSG00000233041	PHGR1	protein_coding	chromosome	proline, histidine and glycine rich 1 [Source:HGNC Symbol;Acc:HGNC:37226]	ENSG00000233041.8	PHGR1	644844	-2.53	10.8	129	9.72e-22	1.25e-20	21
7	100320992	100341908	20917	-	ENSG00000078319	PMS2P1	unprocessed_pseudogene	chromosome	PMS1 homolog 2, mismatch repair system component pseudogene 1 [Source:HGNC Symbol;Acc:HGNC:9123]	ENSG00000078319.9	PMS2P1	NA	1.22	1.96	129	1.03e-21	1.32e-20	21
6	18223860	18264548	40689	-	ENSG00000124795	DEK	protein_coding	chromosome	DEK proto-oncogene [Source:HGNC Symbol;Acc:HGNC:2768]	ENSG00000124795.17	DEK	7913	0.891	6.49	129	1.03e-21	1.32e-20	21
18	23453287	23486603	33317	+	ENSG00000101782	RIOK3	protein_coding	chromosome	RIO kinase 3 [Source:HGNC Symbol;Acc:HGNC:11451]	ENSG00000101782.15	RIOK3	8780	-1.71	7.02	129	1.04e-21	1.34e-20	21
20	58995185	59007254	12070	-	ENSG00000101160	CTSZ	protein_coding	chromosome	cathepsin Z [Source:HGNC Symbol;Acc:HGNC:2547]	ENSG00000101160.14	CTSZ	1522	-0.981	8.16	128	1.06e-21	1.35e-20	21
18	63389190	63422483	33294	-	ENSG00000119541	VPS4B	protein_coding	chromosome	vacuolar protein sorting 4 homolog B [Source:HGNC Symbol;Acc:HGNC:10895]	ENSG00000119541.10	VPS4B	9525	-1.26	5.84	128	1.06e-21	1.35e-20	21
17	45108959	45133354	24396	-	ENSG00000161714	PLCD3	protein_coding	chromosome	phospholipase C delta 3 [Source:HGNC Symbol;Acc:HGNC:9061]	ENSG00000161714.12	PLCD3	113026	-1.78	7.9	128	1.07e-21	1.37e-20	21
4	174490175	174523154	32980	-	ENSG00000164120	HPGD	protein_coding	chromosome	15-hydroxyprostaglandin dehydrogenase [Source:HGNC Symbol;Acc:HGNC:5154]	ENSG00000164120.14	HPGD	3248	-2.74	6.92	128	1.08e-21	1.38e-20	21
19	17334920	17342731	7812	+	ENSG00000130299	GTPBP3	protein_coding	chromosome	GTP binding protein 3, mitochondrial [Source:HGNC Symbol;Acc:HGNC:14880]	ENSG00000130299.17	GTPBP3	84705	1.03	4.72	128	1.11e-21	1.42e-20	21
20	63195429	63216139	20711	-	ENSG00000149658	YTHDF1	protein_coding	chromosome	YTH N6-methyladenosine RNA binding protein 1 [Source:HGNC Symbol;Acc:HGNC:15867]	ENSG00000149658.18	YTHDF1	54915	0.932	5.73	128	1.11e-21	1.42e-20	21
16	2475051	2509560	34510	+	ENSG00000162065	TBC1D24	protein_coding	chromosome	TBC1 domain family member 24 [Source:HGNC Symbol;Acc:HGNC:29203]	ENSG00000162065.14	TBC1D24	57465	1.14	3.83	128	1.11e-21	1.42e-20	21
12	118149801	118372907	223107	-	ENSG00000135090	TAOK3	protein_coding	chromosome	TAO kinase 3 [Source:HGNC Symbol;Acc:HGNC:18133]	ENSG00000135090.14	TAOK3	51347	-0.834	5.71	128	1.15e-21	1.47e-20	20.9
1	244840638	244864560	23923	-	ENSG00000153187	HNRNPU	protein_coding	chromosome	heterogeneous nuclear ribonucleoprotein U [Source:HGNC Symbol;Acc:HGNC:5048]	ENSG00000153187.20	HNRNPU	3192	0.719	8.12	128	1.15e-21	1.46e-20	20.9
1	54609181	54623556	14376	-	ENSG00000162391	FAM151A	protein_coding	chromosome	family with sequence similarity 151 member A [Source:HGNC Symbol;Acc:HGNC:25032]	ENSG00000162391.12	FAM151A	338094	-3.03	2.89	128	1.15e-21	1.47e-20	20.9
1	24356999	24416934	59936	-	ENSG00000001460	STPG1	protein_coding	chromosome	sperm tail PG-rich repeat containing 1 [Source:HGNC Symbol;Acc:HGNC:28070]	ENSG00000001460.18	STPG1	90529	-1.38	3.89	128	1.17e-21	1.49e-20	20.9
17	36591879	36600804	8926	+	ENSG00000278535	DHRS11	protein_coding	chromosome	dehydrogenase/reductase 11 [Source:HGNC Symbol;Acc:HGNC:28639]	ENSG00000278535.5	DHRS11	79154	-2.25	7.19	128	1.19e-21	1.52e-20	20.9
17	5432777	5448830	16054	-	ENSG00000108561	C1QBP	protein_coding	chromosome	complement C1q binding protein [Source:HGNC Symbol;Acc:HGNC:1243]	ENSG00000108561.8	C1QBP	708	1.43	6.11	128	1.2e-21	1.53e-20	20.9
1	229626247	229660200	33954	+	ENSG00000135763	URB2	protein_coding	chromosome	URB2 ribosome biogenesis homolog [Source:HGNC Symbol;Acc:HGNC:28967]	ENSG00000135763.10	URB2	9816	1.92	3.18	128	1.21e-21	1.53e-20	20.9
15	40694774	40732340	37567	+	ENSG00000051180	RAD51	protein_coding	chromosome	RAD51 recombinase [Source:HGNC Symbol;Acc:HGNC:9817]	ENSG00000051180.17	RAD51	5888	1.71	2.84	128	1.22e-21	1.54e-20	20.9
22	36510855	36529184	18330	-	ENSG00000100353	EIF3D	protein_coding	chromosome	eukaryotic translation initiation factor 3 subunit D [Source:HGNC Symbol;Acc:HGNC:3278]	ENSG00000100353.18	EIF3D	8664	0.873	7.04	128	1.22e-21	1.54e-20	20.9
12	105173297	105236203	62907	-	ENSG00000136044	APPL2	protein_coding	chromosome	adaptor protein, phosphotyrosine interacting with PH domain and leucine zipper 2 [Source:HGNC Symbol;Acc:HGNC:18242]	ENSG00000136044.12	APPL2	55198	-1.95	7.24	128	1.22e-21	1.54e-20	20.9
11	119102198	119118544	16347	+	ENSG00000172375	C2CD2L	protein_coding	chromosome	C2CD2 like [Source:HGNC Symbol;Acc:HGNC:29000]	ENSG00000172375.13	C2CD2L	9854	-1.6	6.26	128	1.25e-21	1.58e-20	20.9
11	47239302	47248906	9605	-	ENSG00000134575	ACP2	protein_coding	chromosome	acid phosphatase 2, lysosomal [Source:HGNC Symbol;Acc:HGNC:123]	ENSG00000134575.12	ACP2	53	-0.804	5.32	128	1.27e-21	1.61e-20	20.9
2	131464900	131492743	27844	-	ENSG00000173272	MZT2A	protein_coding	chromosome	mitotic spindle organizing protein 2A [Source:HGNC Symbol;Acc:HGNC:33187]	ENSG00000173272.16	MZT2A	653784	1.33	6.03	128	1.28e-21	1.61e-20	20.9
8	81701334	81732903	31570	-	ENSG00000104231	ZFAND1	protein_coding	chromosome	zinc finger AN1-type containing 1 [Source:HGNC Symbol;Acc:HGNC:25858]	ENSG00000104231.11	ZFAND1	79752	1.19	4.08	128	1.29e-21	1.63e-20	20.9
13	50909678	51024120	114443	+	ENSG00000136104	RNASEH2B	protein_coding	chromosome	ribonuclease H2 subunit B [Source:HGNC Symbol;Acc:HGNC:25671]	ENSG00000136104.20	RNASEH2B	79621	1.34	4.44	128	1.31e-21	1.65e-20	20.9
10	5393101	5404828	11728	-	ENSG00000178462	TUBAL3	protein_coding	chromosome	tubulin alpha like 3 [Source:HGNC Symbol;Acc:HGNC:23534]	ENSG00000178462.12	TUBAL3	79861	-2.86	4.48	128	1.34e-21	1.69e-20	20.9
19	5691834	5720572	28739	-	ENSG00000196365	LONP1	protein_coding	chromosome	lon peptidase 1, mitochondrial [Source:HGNC Symbol;Acc:HGNC:9479]	ENSG00000196365.12	LONP1	9361	1.06	6.43	128	1.35e-21	1.7e-20	20.9
1	201134772	201171574	36803	-	ENSG00000116857	TMEM9	protein_coding	chromosome	transmembrane protein 9 [Source:HGNC Symbol;Acc:HGNC:18823]	ENSG00000116857.17	TMEM9	252839	1.43	5.34	127	1.41e-21	1.77e-20	20.9
14	60971441	60981170	9730	-	ENSG00000126814	TRMT5	protein_coding	chromosome	tRNA methyltransferase 5 [Source:HGNC Symbol;Acc:HGNC:23141]	ENSG00000126814.7	TRMT5	57570	1.08	3.24	127	1.45e-21	1.82e-20	20.8
3	158105855	158545730	439876	+	ENSG00000174891	RSRC1	protein_coding	chromosome	arginine and serine rich coiled-coil 1 [Source:HGNC Symbol;Acc:HGNC:24152]	ENSG00000174891.13	RSRC1	51319	0.941	3.38	127	1.45e-21	1.83e-20	20.8
4	99948086	99950355	2270	-	ENSG00000164032	H2AFZ	protein_coding	chromosome	H2A histone family member Z [Source:HGNC Symbol;Acc:HGNC:4741]	ENSG00000164032.12	H2AFZ	3015	0.981	6.64	127	1.46e-21	1.83e-20	20.8
11	66362521	66372214	9694	-	ENSG00000174669	SLC29A2	protein_coding	chromosome	solute carrier family 29 member 2 [Source:HGNC Symbol;Acc:HGNC:11004]	ENSG00000174669.12	SLC29A2	3177	1.23	5.22	127	1.46e-21	1.83e-20	20.8
11	2887344	2903575	16232	-	ENSG00000254827	SLC22A18AS	protein_coding	chromosome	solute carrier family 22 member 18 antisense [Source:HGNC Symbol;Acc:HGNC:10965]	ENSG00000254827.6	SLC22A18AS	5003	-2.16	4.61	127	1.46e-21	1.83e-20	20.8
11	47778087	47848555	70469	-	ENSG00000030066	NUP160	protein_coding	chromosome	nucleoporin 160 [Source:HGNC Symbol;Acc:HGNC:18017]	ENSG00000030066.13	NUP160	23279	1.06	4.88	127	1.47e-21	1.84e-20	20.8
10	12195965	12250589	54625	+	ENSG00000151465	CDC123	protein_coding	chromosome	cell division cycle 123 [Source:HGNC Symbol;Acc:HGNC:16827]	ENSG00000151465.14	CDC123	8872	0.785	5.21	127	1.47e-21	1.84e-20	20.8
8	124488485	124539458	50974	-	ENSG00000147687	TATDN1	protein_coding	chromosome	TatD DNase domain containing 1 [Source:HGNC Symbol;Acc:HGNC:24220]	ENSG00000147687.19	TATDN1	83940	1.19	3.4	127	1.48e-21	1.85e-20	20.8
7	44606572	44709066	102495	+	ENSG00000105953	OGDH	protein_coding	chromosome	oxoglutarate dehydrogenase [Source:HGNC Symbol;Acc:HGNC:8124]	ENSG00000105953.15	OGDH	4967	-0.864	7.41	127	1.5e-21	1.88e-20	20.8
10	70202835	70233911	31077	-	ENSG00000180817	PPA1	protein_coding	chromosome	pyrophosphatase (inorganic) 1 [Source:HGNC Symbol;Acc:HGNC:9226]	ENSG00000180817.12	PPA1	5464	0.975	6.87	127	1.52e-21	1.9e-20	20.8
13	20702127	20723098	20972	+	ENSG00000172458	IL17D	protein_coding	chromosome	interleukin 17D [Source:HGNC Symbol;Acc:HGNC:5984]	ENSG00000172458.4	IL17D	53342	2.21	2.85	127	1.54e-21	1.92e-20	20.8
13	75549480	75606020	56541	+	ENSG00000118939	UCHL3	protein_coding	chromosome	ubiquitin C-terminal hydrolase L3 [Source:HGNC Symbol;Acc:HGNC:12515]	ENSG00000118939.17	UCHL3	7347	1.15	4.06	127	1.56e-21	1.94e-20	20.8
19	7888505	7902021	13517	+	ENSG00000171017	LRRC8E	protein_coding	chromosome	leucine rich repeat containing 8 VRAC subunit E [Source:HGNC Symbol;Acc:HGNC:26272]	ENSG00000171017.11	LRRC8E	80131	1.64	2.51	127	1.56e-21	1.95e-20	20.8
18	657653	673578	15926	+	ENSG00000176890	TYMS	protein_coding	chromosome	thymidylate synthetase [Source:HGNC Symbol;Acc:HGNC:12441]	ENSG00000176890.16	TYMS	7298	1.7	4.5	127	1.56e-21	1.94e-20	20.8
4	6781375	6884170	102796	+	ENSG00000170871	KIAA0232	protein_coding	chromosome	KIAA0232 [Source:HGNC Symbol;Acc:HGNC:28992]	ENSG00000170871.12	KIAA0232	9778	-1.08	5.69	127	1.61e-21	2.01e-20	20.8
3	42804752	42887974	83223	+	ENSG00000144648	ACKR2	protein_coding	chromosome	atypical chemokine receptor 2 [Source:HGNC Symbol;Acc:HGNC:1565]	ENSG00000144648.16	ACKR2	1238	-2.32	1.65	127	1.64e-21	2.04e-20	20.8
13	41311267	41377030	65764	+	ENSG00000172766	NAA16	protein_coding	chromosome	N(alpha)-acetyltransferase 16, NatA auxiliary subunit [Source:HGNC Symbol;Acc:HGNC:26164]	ENSG00000172766.19	NAA16	79612	1.21	3.31	127	1.65e-21	2.05e-20	20.8
7	1567332	1571005	3674	-	ENSG00000157778	PSMG3	protein_coding	chromosome	proteasome assembly chaperone 3 [Source:HGNC Symbol;Acc:HGNC:22420]	ENSG00000157778.9	PSMG3	84262	0.975	5.02	127	1.7e-21	2.11e-20	20.8
2	58159243	58241372	82130	-	ENSG00000115392	FANCL	protein_coding	chromosome	FA complementation group L [Source:HGNC Symbol;Acc:HGNC:20748]	ENSG00000115392.11	FANCL	55120	0.94	3.2	127	1.74e-21	2.16e-20	20.8
11	16777297	17014414	237118	-	ENSG00000166689	PLEKHA7	protein_coding	chromosome	pleckstrin homology domain containing A7 [Source:HGNC Symbol;Acc:HGNC:27049]	ENSG00000166689.16	PLEKHA7	144100	-1.28	6.87	127	1.74e-21	2.16e-20	20.8
20	35626031	35664956	38926	-	ENSG00000214078	CPNE1	protein_coding	chromosome	copine 1 [Source:HGNC Symbol;Acc:HGNC:2314]	ENSG00000214078.12	CPNE1	8904	1.3	6.96	127	1.77e-21	2.2e-20	20.8
9	130265882	130434123	168242	+	ENSG00000148357	HMCN2	protein_coding	chromosome	hemicentin 2 [Source:HGNC Symbol;Acc:HGNC:21293]	ENSG00000148357.16	HMCN2	256158	-1.97	6.25	127	1.79e-21	2.21e-20	20.7
11	62761565	62766710	5146	+	ENSG00000168002	POLR2G	protein_coding	chromosome	RNA polymerase II subunit G [Source:HGNC Symbol;Acc:HGNC:9194]	ENSG00000168002.12	POLR2G	5436	0.848	4.7	126	1.82e-21	2.25e-20	20.7
X	130202707	130268899	66193	-	ENSG00000056277	ZNF280C	protein_coding	chromosome	zinc finger protein 280C [Source:HGNC Symbol;Acc:HGNC:25955]	ENSG00000056277.16	ZNF280C	55609	1.28	1.4	126	1.85e-21	2.28e-20	20.7
19	1554669	1568058	13390	-	ENSG00000181588	MEX3D	protein_coding	chromosome	mex-3 RNA binding family member D [Source:HGNC Symbol;Acc:HGNC:16734]	ENSG00000181588.16	MEX3D	399664	1.02	5.5	126	1.86e-21	2.3e-20	20.7
13	21176658	21179084	2427	+	ENSG00000173141	MRPL57	protein_coding	chromosome	mitochondrial ribosomal protein L57 [Source:HGNC Symbol;Acc:HGNC:14514]	ENSG00000173141.5	MRPL57	78988	0.889	5.25	126	1.87e-21	2.31e-20	20.7
11	8911139	8920084	8946	+	ENSG00000166452	AKIP1	protein_coding	chromosome	A-kinase interacting protein 1 [Source:HGNC Symbol;Acc:HGNC:1170]	ENSG00000166452.12	AKIP1	56672	0.753	3.61	126	1.88e-21	2.31e-20	20.7
X	106900164	106930861	30698	+	ENSG00000165376	CLDN2	protein_coding	chromosome	claudin 2 [Source:HGNC Symbol;Acc:HGNC:2041]	ENSG00000165376.10	CLDN2	9075	4.84	5.57	126	1.9e-21	2.34e-20	20.7
11	64316460	64318084	1625	-	ENSG00000173113	TRMT112	protein_coding	chromosome	tRNA methyltransferase subunit 11-2 [Source:HGNC Symbol;Acc:HGNC:26940]	ENSG00000173113.6	TRMT112	51504	1.18	5.98	126	1.9e-21	2.34e-20	20.7
12	133037292	133063304	26013	+	ENSG00000198040	ZNF84	protein_coding	chromosome	zinc finger protein 84 [Source:HGNC Symbol;Acc:HGNC:13159]	ENSG00000198040.10	ZNF84	7637	1.14	3.91	126	1.91e-21	2.35e-20	20.7
20	9068763	9481242	412480	+	ENSG00000101333	PLCB4	protein_coding	chromosome	phospholipase C beta 4 [Source:HGNC Symbol;Acc:HGNC:9059]	ENSG00000101333.16	PLCB4	5332	2.02	5.66	126	1.94e-21	2.38e-20	20.7
12	50057548	50083611	26064	+	ENSG00000110881	ASIC1	protein_coding	chromosome	acid sensing ion channel subunit 1 [Source:HGNC Symbol;Acc:HGNC:100]	ENSG00000110881.11	ASIC1	41	2.37	3.2	126	2e-21	2.46e-20	20.7
15	78565520	78595269	29750	+	ENSG00000169684	CHRNA5	protein_coding	chromosome	cholinergic receptor nicotinic alpha 5 subunit [Source:HGNC Symbol;Acc:HGNC:1959]	ENSG00000169684.13	CHRNA5	1138	2.11	1.52	126	2.01e-21	2.47e-20	20.7
1	53226900	53238518	11619	-	ENSG00000162385	MAGOH	protein_coding	chromosome	mago homolog, exon junction complex subunit [Source:HGNC Symbol;Acc:HGNC:6815]	ENSG00000162385.11	MAGOH	4116	0.671	3.93	126	2.02e-21	2.47e-20	20.7
12	121777754	121803403	25650	-	ENSG00000139725	RHOF	protein_coding	chromosome	ras homolog family member F, filopodia associated [Source:HGNC Symbol;Acc:HGNC:15703]	ENSG00000139725.8	RHOF	54509	-1.83	6.57	126	2.03e-21	2.48e-20	20.7
4	103105349	103198445	93097	-	ENSG00000138778	CENPE	protein_coding	chromosome	centromere protein E [Source:HGNC Symbol;Acc:HGNC:1856]	ENSG00000138778.12	CENPE	1062	2.23	2.98	126	2.06e-21	2.52e-20	20.7
7	44026951	44041892	14942	-	ENSG00000228903	RASA4CP	transcribed_unprocessed_pseudogene	chromosome	RAS p21 protein activator 4C, pseudogene [Source:HGNC Symbol;Acc:HGNC:44185]	ENSG00000228903.7	RASA4CP	NA	-1.38	4.05	126	2.13e-21	2.6e-20	20.7
17	40475828	40501623	25796	-	ENSG00000131746	TNS4	protein_coding	chromosome	tensin 4 [Source:HGNC Symbol;Acc:HGNC:24352]	ENSG00000131746.13	TNS4	84951	2.57	5.24	126	2.15e-21	2.63e-20	20.7
12	57475445	57517569	42125	+	ENSG00000166986	MARS	protein_coding	chromosome	methionyl-tRNA synthetase [Source:HGNC Symbol;Acc:HGNC:6898]	ENSG00000166986.15	MARS	4141	0.893	6.26	126	2.17e-21	2.65e-20	20.7
3	125916620	125930024	13405	+	ENSG00000171084	FAM86JP	transcribed_unprocessed_pseudogene	chromosome	family with sequence similarity 86 member J, pseudogene [Source:HGNC Symbol;Acc:HGNC:44097]	ENSG00000171084.15	FAM86JP	NA	1.73	1.07	126	2.18e-21	2.66e-20	20.7
18	9136228	9285985	149758	+	ENSG00000101745	ANKRD12	protein_coding	chromosome	ankyrin repeat domain 12 [Source:HGNC Symbol;Acc:HGNC:29135]	ENSG00000101745.17	ANKRD12	23253	-1.15	5.51	126	2.21e-21	2.69e-20	20.7
9	34366666	34376898	10233	-	ENSG00000164976	MYORG	protein_coding	chromosome	myogenesis regulating glycosidase (putative) [Source:HGNC Symbol;Acc:HGNC:19918]	ENSG00000164976.9	MYORG	57462	-1.3	6.72	126	2.23e-21	2.72e-20	20.7
12	94306449	94459988	153540	-	ENSG00000173588	CEP83	protein_coding	chromosome	centrosomal protein 83 [Source:HGNC Symbol;Acc:HGNC:17966]	ENSG00000173588.15	CEP83	51134	1.34	2.97	126	2.25e-21	2.74e-20	20.6
3	63833870	63863868	29999	-	ENSG00000163634	THOC7	protein_coding	chromosome	THO complex 7 [Source:HGNC Symbol;Acc:HGNC:29874]	ENSG00000163634.12	THOC7	80145	0.886	4.25	126	2.27e-21	2.76e-20	20.6
17	75205659	75235758	30100	+	ENSG00000125450	NUP85	protein_coding	chromosome	nucleoporin 85 [Source:HGNC Symbol;Acc:HGNC:8734]	ENSG00000125450.11	NUP85	79902	0.891	5.24	126	2.28e-21	2.77e-20	20.6
11	45921621	45929096	7476	+	ENSG00000165905	LARGE2	protein_coding	chromosome	LARGE xylosyl- and glucuronyltransferase 2 [Source:HGNC Symbol;Acc:HGNC:16522]	ENSG00000165905.18	LARGE2	120071	3.64	4.39	126	2.28e-21	2.77e-20	20.6
1	38009258	38024820	15563	+	ENSG00000183520	UTP11	protein_coding	chromosome	UTP11 small subunit processome component [Source:HGNC Symbol;Acc:HGNC:24329]	ENSG00000183520.12	UTP11	51118	0.888	4.02	126	2.28e-21	2.77e-20	20.6
19	7112255	7294414	182160	-	ENSG00000171105	INSR	protein_coding	chromosome	insulin receptor [Source:HGNC Symbol;Acc:HGNC:6091]	ENSG00000171105.14	INSR	3643	-0.948	6.35	126	2.31e-21	2.81e-20	20.6
5	72219409	72320646	101238	-	ENSG00000113048	MRPS27	protein_coding	chromosome	mitochondrial ribosomal protein S27 [Source:HGNC Symbol;Acc:HGNC:14512]	ENSG00000113048.16	MRPS27	23107	1.14	4.81	126	2.33e-21	2.83e-20	20.6
1	15742499	15747982	5484	+	ENSG00000162460	TMEM82	protein_coding	chromosome	transmembrane protein 82 [Source:HGNC Symbol;Acc:HGNC:32350]	ENSG00000162460.7	TMEM82	388595	-2.85	3.95	125	2.35e-21	2.85e-20	20.6
15	65045387	65053397	8011	+	ENSG00000186198	SLC51B	protein_coding	chromosome	solute carrier family 51 beta subunit [Source:HGNC Symbol;Acc:HGNC:29956]	ENSG00000186198.4	SLC51B	123264	-2.97	5.17	125	2.36e-21	2.86e-20	20.6
2	177212563	177223958	11396	+	ENSG00000170144	HNRNPA3	protein_coding	chromosome	heterogeneous nuclear ribonucleoprotein A3 [Source:HGNC Symbol;Acc:HGNC:24941]	ENSG00000170144.20	HNRNPA3	220988	0.885	7.74	125	2.38e-21	2.88e-20	20.6
22	38578120	38656629	78510	-	ENSG00000184949	FAM227A	protein_coding	chromosome	family with sequence similarity 227 member A [Source:HGNC Symbol;Acc:HGNC:44197]	ENSG00000184949.16	FAM227A	646851	1.74	1.91	125	2.42e-21	2.92e-20	20.6
1	31790422	31816051	25630	-	ENSG00000134668	SPOCD1	protein_coding	chromosome	SPOC domain containing 1 [Source:HGNC Symbol;Acc:HGNC:26338]	ENSG00000134668.12	SPOCD1	90853	2.15	1.09	125	2.44e-21	2.95e-20	20.6
12	47661249	47706030	44782	-	ENSG00000005175	RPAP3	protein_coding	chromosome	RNA polymerase II associated protein 3 [Source:HGNC Symbol;Acc:HGNC:26151]	ENSG00000005175.10	RPAP3	79657	1.11	3.47	125	2.52e-21	3.05e-20	20.6
13	59665583	60163928	498346	-	ENSG00000139734	DIAPH3	protein_coding	chromosome	diaphanous related formin 3 [Source:HGNC Symbol;Acc:HGNC:15480]	ENSG00000139734.19	DIAPH3	81624	2.3	2.5	125	2.54e-21	3.06e-20	20.6
16	4331549	4355607	24059	-	ENSG00000217930	PAM16	protein_coding	chromosome	presequence translocase associated motor 16 [Source:HGNC Symbol;Acc:HGNC:29679]	ENSG00000217930.8	PAM16	51025	1.26	4.17	125	2.59e-21	3.13e-20	20.6
1	68474152	68497221	23070	-	ENSG00000024526	DEPDC1	protein_coding	chromosome	DEP domain containing 1 [Source:HGNC Symbol;Acc:HGNC:22949]	ENSG00000024526.17	DEPDC1	55635	2.36	2.36	125	2.62e-21	3.15e-20	20.6
3	127689062	128052190	363129	-	ENSG00000074416	MGLL	protein_coding	chromosome	monoglyceride lipase [Source:HGNC Symbol;Acc:HGNC:17038]	ENSG00000074416.14	MGLL	11343	-1.85	8.93	125	2.62e-21	3.16e-20	20.6
3	172505508	172523475	17968	-	ENSG00000121858	TNFSF10	protein_coding	chromosome	TNF superfamily member 10 [Source:HGNC Symbol;Acc:HGNC:11925]	ENSG00000121858.11	TNFSF10	8743	-1.82	6.48	125	2.62e-21	3.16e-20	20.6
20	4120980	4187747	66768	+	ENSG00000088826	SMOX	protein_coding	chromosome	spermine oxidase [Source:HGNC Symbol;Acc:HGNC:15862]	ENSG00000088826.18	SMOX	54498	2	3.89	125	2.69e-21	3.23e-20	20.6
1	147629652	147670524	40873	-	ENSG00000162836	ACP6	protein_coding	chromosome	acid phosphatase 6, lysophosphatidic [Source:HGNC Symbol;Acc:HGNC:29609]	ENSG00000162836.12	ACP6	51205	1.36	4.14	125	2.69e-21	3.24e-20	20.6
11	19224063	19241620	17558	-	ENSG00000129173	E2F8	protein_coding	chromosome	E2F transcription factor 8 [Source:HGNC Symbol;Acc:HGNC:24727]	ENSG00000129173.13	E2F8	79733	2.15	2.73	125	2.79e-21	3.35e-20	20.6
X	17375420	17735994	360575	+	ENSG00000188158	NHS	protein_coding	chromosome	NHS actin remodeling regulator [Source:HGNC Symbol;Acc:HGNC:7820]	ENSG00000188158.15	NHS	4810	2.08	2.69	125	2.82e-21	3.38e-20	20.5
17	10699015	10730316	31302	-	ENSG00000187824	TMEM220	protein_coding	chromosome	transmembrane protein 220 [Source:HGNC Symbol;Acc:HGNC:33757]	ENSG00000187824.8	TMEM220	388335	-2.33	3.73	125	2.83e-21	3.39e-20	20.5
9	38392702	38398661	5960	+	ENSG00000137124	ALDH1B1	protein_coding	chromosome	aldehyde dehydrogenase 1 family member B1 [Source:HGNC Symbol;Acc:HGNC:407]	ENSG00000137124.8	ALDH1B1	219	2.02	5.62	125	2.87e-21	3.44e-20	20.5
17	59674636	59707626	32991	-	ENSG00000141378	PTRH2	protein_coding	chromosome	peptidyl-tRNA hydrolase 2 [Source:HGNC Symbol;Acc:HGNC:24265]	ENSG00000141378.14	PTRH2	51651	1.15	3.83	125	2.87e-21	3.44e-20	20.5
16	81081938	81096425	14488	-	ENSG00000140905	GCSH	protein_coding	chromosome	glycine cleavage system protein H [Source:HGNC Symbol;Acc:HGNC:4208]	ENSG00000140905.10	GCSH	2653	1.53	3.48	125	2.94e-21	3.51e-20	20.5
11	119355215	119381711	26497	-	ENSG00000036672	USP2	protein_coding	chromosome	ubiquitin specific peptidase 2 [Source:HGNC Symbol;Acc:HGNC:12618]	ENSG00000036672.16	USP2	9099	-2.75	4.28	125	3.07e-21	3.66e-20	20.5
3	19148510	19535642	387133	+	ENSG00000183960	KCNH8	protein_coding	chromosome	potassium voltage-gated channel subfamily H member 8 [Source:HGNC Symbol;Acc:HGNC:18864]	ENSG00000183960.9	KCNH8	131096	2.23	2.21	124	3.08e-21	3.68e-20	20.5
15	90966190	91022566	56377	-	ENSG00000284946	AC068831.7	protein_coding	chromosome	novel protein	ENSG00000284946.1	AC068831.7	NA	1.78	3.43	124	3.09e-21	3.68e-20	20.5
1	180972712	181023121	50410	-	ENSG00000135823	STX6	protein_coding	chromosome	syntaxin 6 [Source:HGNC Symbol;Acc:HGNC:11441]	ENSG00000135823.14	STX6	10228	0.662	4.5	124	3.11e-21	3.71e-20	20.5
11	117314557	117413266	98710	+	ENSG00000110274	CEP164	protein_coding	chromosome	centrosomal protein 164 [Source:HGNC Symbol;Acc:HGNC:29182]	ENSG00000110274.16	CEP164	22897	0.896	4.68	124	3.12e-21	3.72e-20	20.5
7	107563484	107578523	15040	+	ENSG00000105865	DUS4L	protein_coding	chromosome	dihydrouridine synthase 4 like [Source:HGNC Symbol;Acc:HGNC:21517]	ENSG00000105865.11	DUS4L	11062	1.21	1.94	124	3.16e-21	3.76e-20	20.5
19	2071036	2096673	25638	-	ENSG00000172081	MOB3A	protein_coding	chromosome	MOB kinase activator 3A [Source:HGNC Symbol;Acc:HGNC:29802]	ENSG00000172081.14	MOB3A	126308	-0.871	4.81	124	3.2e-21	3.81e-20	20.5
16	2253116	2268397	15282	-	ENSG00000205937	RNPS1	protein_coding	chromosome	RNA binding protein with serine rich domain 1 [Source:HGNC Symbol;Acc:HGNC:10080]	ENSG00000205937.12	RNPS1	10921	0.708	7.15	124	3.22e-21	3.82e-20	20.5
15	77041404	77083984	42581	-	ENSG00000140391	TSPAN3	protein_coding	chromosome	tetraspanin 3 [Source:HGNC Symbol;Acc:HGNC:17752]	ENSG00000140391.15	TSPAN3	10099	-1.64	9.21	124	3.24e-21	3.85e-20	20.5
3	124730433	124749273	18841	+	ENSG00000114491	UMPS	protein_coding	chromosome	uridine monophosphate synthetase [Source:HGNC Symbol;Acc:HGNC:12563]	ENSG00000114491.14	UMPS	7372	1.36	4.37	124	3.3e-21	3.92e-20	20.5
7	24796540	24981634	185095	-	ENSG00000070882	OSBPL3	protein_coding	chromosome	oxysterol binding protein like 3 [Source:HGNC Symbol;Acc:HGNC:16370]	ENSG00000070882.13	OSBPL3	26031	1.36	4.71	124	3.44e-21	4.08e-20	20.5
19	51097606	51108409	10804	-	ENSG00000142544	CTU1	protein_coding	chromosome	cytosolic thiouridylase subunit 1 [Source:HGNC Symbol;Acc:HGNC:29590]	ENSG00000142544.7	CTU1	90353	1.28	4.04	124	3.45e-21	4.09e-20	20.5
19	35124513	35142451	17939	-	ENSG00000153902	LGI4	protein_coding	chromosome	leucine rich repeat LGI family member 4 [Source:HGNC Symbol;Acc:HGNC:18712]	ENSG00000153902.14	LGI4	163175	-2.49	4.5	124	3.48e-21	4.12e-20	20.5
7	150368189	150374044	5856	+	ENSG00000214022	REPIN1	protein_coding	chromosome	replication initiator 1 [Source:HGNC Symbol;Acc:HGNC:17922]	ENSG00000214022.11	REPIN1	29803	1.06	7.91	124	3.49e-21	4.14e-20	20.5
18	21650901	21704780	53880	-	ENSG00000158201	ABHD3	protein_coding	chromosome	abhydrolase domain containing 3 [Source:HGNC Symbol;Acc:HGNC:18718]	ENSG00000158201.10	ABHD3	171586	-2	6.22	124	3.5e-21	4.14e-20	20.5
7	143288215	143307696	19482	+	ENSG00000106144	CASP2	protein_coding	chromosome	caspase 2 [Source:HGNC Symbol;Acc:HGNC:1503]	ENSG00000106144.20	CASP2	835	0.789	4.91	124	3.64e-21	4.3e-20	20.4
5	139647299	139683882	36584	+	ENSG00000171604	CXXC5	protein_coding	chromosome	CXXC finger protein 5 [Source:HGNC Symbol;Acc:HGNC:26943]	ENSG00000171604.12	CXXC5	51523	1.11	5.66	124	3.64e-21	4.3e-20	20.4
4	186069152	186088069	18918	+	ENSG00000164342	TLR3	protein_coding	chromosome	toll like receptor 3 [Source:HGNC Symbol;Acc:HGNC:11849]	ENSG00000164342.12	TLR3	7098	-2.26	4.41	124	3.66e-21	4.32e-20	20.4
22	50622754	50628173	5420	-	ENSG00000100299	ARSA	protein_coding	chromosome	arylsulfatase A [Source:HGNC Symbol;Acc:HGNC:713]	ENSG00000100299.18	ARSA	410	-1.16	6.75	124	3.69e-21	4.35e-20	20.4
19	42507304	42561234	53931	-	ENSG00000079385	CEACAM1	protein_coding	chromosome	carcinoembryonic antigen related cell adhesion molecule 1 [Source:HGNC Symbol;Acc:HGNC:1814]	ENSG00000079385.22	CEACAM1	634	-2.39	9.54	124	3.74e-21	4.41e-20	20.4
7	135148072	135166215	18144	+	ENSG00000146859	TMEM140	protein_coding	chromosome	transmembrane protein 140 [Source:HGNC Symbol;Acc:HGNC:21870]	ENSG00000146859.6	TMEM140	55281	-1.6	4.67	124	3.75e-21	4.41e-20	20.4
2	108786757	108885477	98721	+	ENSG00000163006	CCDC138	protein_coding	chromosome	coiled-coil domain containing 138 [Source:HGNC Symbol;Acc:HGNC:26531]	ENSG00000163006.12	CCDC138	165055	1.58	1.44	124	3.89e-21	4.58e-20	20.4
7	56064002	56080670	16669	+	ENSG00000129103	SUMF2	protein_coding	chromosome	sulfatase modifying factor 2 [Source:HGNC Symbol;Acc:HGNC:20415]	ENSG00000129103.18	SUMF2	25870	0.882	6.26	124	3.94e-21	4.63e-20	20.4
16	71565660	71577092	11433	-	ENSG00000198650	TAT	protein_coding	chromosome	tyrosine aminotransferase [Source:HGNC Symbol;Acc:HGNC:11573]	ENSG00000198650.11	TAT	6898	-2.16	0.372	124	3.97e-21	4.67e-20	20.4
10	62183035	62268844	85810	-	ENSG00000182010	RTKN2	protein_coding	chromosome	rhotekin 2 [Source:HGNC Symbol;Acc:HGNC:19364]	ENSG00000182010.11	RTKN2	219790	2.13	1.92	124	3.98e-21	4.67e-20	20.4
5	176383938	176388975	5038	-	ENSG00000048162	NOP16	protein_coding	chromosome	NOP16 nucleolar protein [Source:HGNC Symbol;Acc:HGNC:26934]	ENSG00000048162.20	NOP16	51491	1.36	4.63	124	4.01e-21	4.7e-20	20.4
19	48455509	48466980	11472	+	ENSG00000182324	KCNJ14	protein_coding	chromosome	potassium voltage-gated channel subfamily J member 14 [Source:HGNC Symbol;Acc:HGNC:6260]	ENSG00000182324.6	KCNJ14	3770	1.58	1.33	124	4.01e-21	4.7e-20	20.4
16	1984193	1987749	3557	+	ENSG00000127554	GFER	protein_coding	chromosome	growth factor, augmenter of liver regeneration [Source:HGNC Symbol;Acc:HGNC:4236]	ENSG00000127554.13	GFER	2671	-1.08	5.86	123	4.1e-21	4.8e-20	20.4
10	70298970	70382650	83681	-	ENSG00000172731	LRRC20	protein_coding	chromosome	leucine rich repeat containing 20 [Source:HGNC Symbol;Acc:HGNC:23421]	ENSG00000172731.14	LRRC20	55222	1.77	3.12	123	4.11e-21	4.81e-20	20.4
9	128819651	128829794	10144	-	ENSG00000198917	SPOUT1	protein_coding	chromosome	SPOUT domain containing methyltransferase 1 [Source:HGNC Symbol;Acc:HGNC:26933]	ENSG00000198917.13	SPOUT1	51490	1.01	5.33	123	4.17e-21	4.88e-20	20.4
16	3144015	3149963	5949	+	ENSG00000228146	CASP16P	transcribed_unitary_pseudogene	chromosome	caspase 16, pseudogene [Source:HGNC Symbol;Acc:HGNC:27290]	ENSG00000228146.8	CASP16P	NA	-2.51	2.75	123	4.19e-21	4.9e-20	20.4
20	57168753	57266641	97889	-	ENSG00000101144	BMP7	protein_coding	chromosome	bone morphogenetic protein 7 [Source:HGNC Symbol;Acc:HGNC:1074]	ENSG00000101144.13	BMP7	655	2.58	4.53	123	4.22e-21	4.93e-20	20.4
12	13196723	13219941	23219	+	ENSG00000134531	EMP1	protein_coding	chromosome	epithelial membrane protein 1 [Source:HGNC Symbol;Acc:HGNC:3333]	ENSG00000134531.10	EMP1	2012	-2.11	7.91	123	4.23e-21	4.94e-20	20.4
17	31008497	31093127	84631	+	ENSG00000266865	AC138207.8	transcribed_unprocessed_pseudogene	chromosome	SMAD specific E3 ubiquitin protein ligase 2 (SMURF2) pseudogene	ENSG00000266865.6	AC138207.8	NA	-1.69	0.638	123	4.26e-21	4.97e-20	20.4
2	238238267	238240662	2396	-	ENSG00000144485	HES6	protein_coding	chromosome	hes family bHLH transcription factor 6 [Source:HGNC Symbol;Acc:HGNC:18254]	ENSG00000144485.11	HES6	55502	1.52	6.07	123	4.27e-21	4.97e-20	20.4
4	182890060	182917936	27877	-	ENSG00000129187	DCTD	protein_coding	chromosome	dCMP deaminase [Source:HGNC Symbol;Acc:HGNC:2710]	ENSG00000129187.14	DCTD	1635	0.899	5.35	123	4.33e-21	5.04e-20	20.4
2	105264391	105329735	65345	-	ENSG00000135966	TGFBRAP1	protein_coding	chromosome	transforming growth factor beta receptor associated protein 1 [Source:HGNC Symbol;Acc:HGNC:16836]	ENSG00000135966.13	TGFBRAP1	9392	0.505	5.04	123	4.38e-21	5.1e-20	20.4
20	63865228	63891545	26318	+	ENSG00000101150	TPD52L2	protein_coding	chromosome	TPD52 like 2 [Source:HGNC Symbol;Acc:HGNC:12007]	ENSG00000101150.17	TPD52L2	7165	0.897	6.75	123	4.41e-21	5.13e-20	20.4
3	52048919	52056571	7653	-	ENSG00000164086	DUSP7	protein_coding	chromosome	dual specificity phosphatase 7 [Source:HGNC Symbol;Acc:HGNC:3073]	ENSG00000164086.10	DUSP7	1849	1.07	3.82	123	4.51e-21	5.24e-20	20.3
12	132144457	132152473	8017	+	ENSG00000184967	NOC4L	protein_coding	chromosome	nucleolar complex associated 4 homolog [Source:HGNC Symbol;Acc:HGNC:28461]	ENSG00000184967.7	NOC4L	79050	1.27	4.6	123	4.57e-21	5.31e-20	20.3
2	240676418	240682906	6489	-	ENSG00000185176	AQP12B	protein_coding	chromosome	aquaporin 12B [Source:HGNC Symbol;Acc:HGNC:6096]	ENSG00000185176.13	AQP12B	653437	-3.02	3.47	123	4.61e-21	5.35e-20	20.3
3	9837849	9844602	6754	-	ENSG00000156990	RPUSD3	protein_coding	chromosome	RNA pseudouridine synthase D3 [Source:HGNC Symbol;Acc:HGNC:28437]	ENSG00000156990.14	RPUSD3	285367	0.752	4.33	123	4.67e-21	5.42e-20	20.3
20	62841005	62861822	20818	-	ENSG00000101190	TCFL5	protein_coding	chromosome	transcription factor like 5 [Source:HGNC Symbol;Acc:HGNC:11646]	ENSG00000101190.13	TCFL5	10732	1.51	3.61	123	4.68e-21	5.43e-20	20.3
17	38671703	38674957	3255	-	ENSG00000273604	EPOP	protein_coding	chromosome	elongin BC and polycomb repressive complex 2 associated protein [Source:HGNC Symbol;Acc:HGNC:34493]	ENSG00000273604.2	EPOP	100170841	3.09	3.27	123	4.7e-21	5.45e-20	20.3
3	46979683	47009704	30022	+	ENSG00000160796	NBEAL2	protein_coding	chromosome	neurobeachin like 2 [Source:HGNC Symbol;Acc:HGNC:31928]	ENSG00000160796.17	NBEAL2	23218	1.3	7.94	123	4.73e-21	5.48e-20	20.3
1	166839447	166856344	16898	+	ENSG00000143157	POGK	protein_coding	chromosome	pogo transposable element derived with KRAB domain [Source:HGNC Symbol;Acc:HGNC:18800]	ENSG00000143157.11	POGK	57645	0.841	5.18	123	4.89e-21	5.66e-20	20.3
10	92046692	92291078	244387	-	ENSG00000107864	CPEB3	protein_coding	chromosome	cytoplasmic polyadenylation element binding protein 3 [Source:HGNC Symbol;Acc:HGNC:21746]	ENSG00000107864.15	CPEB3	22849	-1.16	2.51	123	4.91e-21	5.68e-20	20.3
X	16587999	16712936	124938	-	ENSG00000047230	CTPS2	protein_coding	chromosome	CTP synthase 2 [Source:HGNC Symbol;Acc:HGNC:2520]	ENSG00000047230.15	CTPS2	56474	1.08	4.36	123	4.94e-21	5.71e-20	20.3
4	7041899	7057952	16054	+	ENSG00000173011	TADA2B	protein_coding	chromosome	transcriptional adaptor 2B [Source:HGNC Symbol;Acc:HGNC:30781]	ENSG00000173011.12	TADA2B	93624	-0.567	5.07	123	5e-21	5.77e-20	20.3
6	17600302	17611715	11414	+	ENSG00000137414	FAM8A1	protein_coding	chromosome	family with sequence similarity 8 member A1 [Source:HGNC Symbol;Acc:HGNC:16372]	ENSG00000137414.6	FAM8A1	51439	-1.37	5.76	123	5.02e-21	5.79e-20	20.3
2	219195237	219209651	14415	+	ENSG00000158552	ZFAND2B	protein_coding	chromosome	zinc finger AN1-type containing 2B [Source:HGNC Symbol;Acc:HGNC:25206]	ENSG00000158552.13	ZFAND2B	130617	-1.05	5.82	123	5.05e-21	5.82e-20	20.3
22	19969896	20016823	46928	-	ENSG00000099889	ARVCF	protein_coding	chromosome	ARVCF delta catenin family member [Source:HGNC Symbol;Acc:HGNC:728]	ENSG00000099889.14	ARVCF	421	1.43	4.49	123	5.06e-21	5.83e-20	20.3
16	70346861	70373383	26523	+	ENSG00000168872	DDX19A	protein_coding	chromosome	DEAD-box helicase 19A [Source:HGNC Symbol;Acc:HGNC:25628]	ENSG00000168872.17	DDX19A	55308	0.838	5	123	5.16e-21	5.94e-20	20.3
2	26190635	26244672	54038	-	ENSG00000084754	HADHA	protein_coding	chromosome	hydroxyacyl-CoA dehydrogenase trifunctional multienzyme complex subunit alpha [Source:HGNC Symbol;Acc:HGNC:4801]	ENSG00000084754.12	HADHA	3030	-0.762	7.64	123	5.21e-21	5.99e-20	20.3
10	128096659	128126423	29765	-	ENSG00000148773	MKI67	protein_coding	chromosome	marker of proliferation Ki-67 [Source:HGNC Symbol;Acc:HGNC:7107]	ENSG00000148773.14	MKI67	4288	2.39	6.42	123	5.27e-21	6.05e-20	20.3
4	17800655	17810758	10104	-	ENSG00000163257	DCAF16	protein_coding	chromosome	DDB1 and CUL4 associated factor 16 [Source:HGNC Symbol;Acc:HGNC:25987]	ENSG00000163257.11	DCAF16	54876	0.812	4.6	122	5.42e-21	6.22e-20	20.3
5	154712843	154817605	104763	+	ENSG00000155506	LARP1	protein_coding	chromosome	La ribonucleoprotein domain family member 1 [Source:HGNC Symbol;Acc:HGNC:29531]	ENSG00000155506.17	LARP1	23367	0.883	6.83	122	5.43e-21	6.23e-20	20.3
6	147508690	147737547	228858	+	ENSG00000203727	SAMD5	protein_coding	chromosome	sterile alpha motif domain containing 5 [Source:HGNC Symbol;Acc:HGNC:21180]	ENSG00000203727.4	SAMD5	389432	2.2	4.06	122	5.45e-21	6.25e-20	20.3
2	203328239	203447728	119490	+	ENSG00000138443	ABI2	protein_coding	chromosome	abl interactor 2 [Source:HGNC Symbol;Acc:HGNC:24011]	ENSG00000138443.16	ABI2	10152	1.05	4.62	122	5.54e-21	6.35e-20	20.3
19	29923644	30016612	92969	+	ENSG00000105176	URI1	protein_coding	chromosome	URI1 prefoldin like chaperone [Source:HGNC Symbol;Acc:HGNC:13236]	ENSG00000105176.18	URI1	8725	0.824	5.39	122	5.62e-21	6.43e-20	20.3
20	62642503	62685785	43283	+	ENSG00000101187	SLCO4A1	protein_coding	chromosome	solute carrier organic anion transporter family member 4A1 [Source:HGNC Symbol;Acc:HGNC:10953]	ENSG00000101187.16	SLCO4A1	28231	2.06	5.77	122	5.77e-21	6.6e-20	20.2
14	52775193	52791668	16476	-	ENSG00000100522	GNPNAT1	protein_coding	chromosome	glucosamine-phosphate N-acetyltransferase 1 [Source:HGNC Symbol;Acc:HGNC:19980]	ENSG00000100522.10	GNPNAT1	64841	1.34	4.95	122	5.78e-21	6.62e-20	20.2
9	136375577	136400168	24592	-	ENSG00000165684	SNAPC4	protein_coding	chromosome	small nuclear RNA activating complex polypeptide 4 [Source:HGNC Symbol;Acc:HGNC:11137]	ENSG00000165684.4	SNAPC4	6621	0.992	5.23	122	5.86e-21	6.7e-20	20.2
1	151870866	151909637	38772	-	ENSG00000159445	THEM4	protein_coding	chromosome	thioesterase superfamily member 4 [Source:HGNC Symbol;Acc:HGNC:17947]	ENSG00000159445.13	THEM4	117145	1.02	3.61	122	5.99e-21	6.85e-20	20.2
15	88621337	88632281	10945	+	ENSG00000181026	AEN	protein_coding	chromosome	apoptosis enhancing nuclease [Source:HGNC Symbol;Acc:HGNC:25722]	ENSG00000181026.15	AEN	64782	1.51	4.66	122	6.19e-21	7.06e-20	20.2
2	97756333	97995948	239616	-	ENSG00000075568	TMEM131	protein_coding	chromosome	transmembrane protein 131 [Source:HGNC Symbol;Acc:HGNC:30366]	ENSG00000075568.17	TMEM131	23505	-0.98	6.42	122	6.21e-21	7.08e-20	20.2
12	55716036	55724703	8668	+	ENSG00000258311	AC009779.3	protein_coding	chromosome	novel protein	ENSG00000258311.5	AC009779.3	NA	-1.21	3.71	122	6.3e-21	7.19e-20	20.2
2	231523187	231530445	7259	-	ENSG00000171596	NMUR1	protein_coding	chromosome	neuromedin U receptor 1 [Source:HGNC Symbol;Acc:HGNC:4518]	ENSG00000171596.7	NMUR1	10316	-1.7	1.27	122	6.4e-21	7.29e-20	20.2
21	34787801	36004667	1216867	-	ENSG00000159216	RUNX1	protein_coding	chromosome	RUNX family transcription factor 1 [Source:HGNC Symbol;Acc:HGNC:10471]	ENSG00000159216.18	RUNX1	861	1.38	5.11	122	6.41e-21	7.3e-20	20.2
10	68414064	68472121	58058	-	ENSG00000138346	DNA2	protein_coding	chromosome	DNA replication helicase/nuclease 2 [Source:HGNC Symbol;Acc:HGNC:2939]	ENSG00000138346.15	DNA2	1763	1.71	2.23	122	6.64e-21	7.55e-20	20.2
15	45479606	45522755	43150	-	ENSG00000104154	SLC30A4	protein_coding	chromosome	solute carrier family 30 member 4 [Source:HGNC Symbol;Acc:HGNC:11015]	ENSG00000104154.7	SLC30A4	7782	-1.34	3.94	122	6.66e-21	7.57e-20	20.2
3	87227271	87255556	28286	+	ENSG00000083937	CHMP2B	protein_coding	chromosome	charged multivesicular body protein 2B [Source:HGNC Symbol;Acc:HGNC:24537]	ENSG00000083937.9	CHMP2B	25978	-1.22	5.86	122	6.69e-21	7.6e-20	20.2
8	103398635	103415189	16555	-	ENSG00000164933	SLC25A32	protein_coding	chromosome	solute carrier family 25 member 32 [Source:HGNC Symbol;Acc:HGNC:29683]	ENSG00000164933.12	SLC25A32	81034	1.28	3.93	122	6.8e-21	7.72e-20	20.2
16	89921392	89938761	17370	+	ENSG00000258947	TUBB3	protein_coding	chromosome	tubulin beta 3 class III [Source:HGNC Symbol;Acc:HGNC:20772]	ENSG00000258947.7	TUBB3	10381	2.51	4.23	122	6.95e-21	7.89e-20	20.2
13	27620742	27744237	123496	+	ENSG00000186184	POLR1D	protein_coding	chromosome	RNA polymerase I and III subunit D [Source:HGNC Symbol;Acc:HGNC:20422]	ENSG00000186184.18	POLR1D	51082	0.95	6.3	121	6.97e-21	7.9e-20	20.2
15	64364304	64387687	23384	-	ENSG00000166803	PCLAF	protein_coding	chromosome	PCNA clamp associated factor [Source:HGNC Symbol;Acc:HGNC:28961]	ENSG00000166803.13	PCLAF	9768	1.93	3.1	121	6.98e-21	7.9e-20	20.2
22	36487190	36507101	19912	-	ENSG00000100350	FOXRED2	protein_coding	chromosome	FAD dependent oxidoreductase domain containing 2 [Source:HGNC Symbol;Acc:HGNC:26264]	ENSG00000100350.14	FOXRED2	80020	1.66	3.31	121	7.02e-21	7.95e-20	20.2
5	34905260	34918989	13730	-	ENSG00000113456	RAD1	protein_coding	chromosome	RAD1 checkpoint DNA exonuclease [Source:HGNC Symbol;Acc:HGNC:9806]	ENSG00000113456.19	RAD1	5810	0.831	3.72	121	7.04e-21	7.96e-20	20.2
X	152914442	152973480	59039	+	ENSG00000147394	ZNF185	protein_coding	chromosome	zinc finger protein 185 with LIM domain [Source:HGNC Symbol;Acc:HGNC:12976]	ENSG00000147394.18	ZNF185	7739	1.71	3.24	121	7.04e-21	7.96e-20	20.2
14	67241342	67336061	94720	+	ENSG00000072415	MPP5	protein_coding	chromosome	membrane palmitoylated protein 5 [Source:HGNC Symbol;Acc:HGNC:18669]	ENSG00000072415.9	MPP5	64398	-1.2	4.88	121	7.26e-21	8.2e-20	20.1
CHR_HSCHR17_4_CTG4	40922696	40937634	14939	-	ENSG00000263309	KRT23	protein_coding	chromosome	keratin 23 [Source:HGNC Symbol;Acc:HGNC:6438]	ENSG00000263309.6	KRT23	25984	4.47	4.23	121	7.31e-21	8.25e-20	20.1
2	68122936	68157549	34614	-	ENSG00000243667	WDR92	protein_coding	chromosome	WD repeat domain 92 [Source:HGNC Symbol;Acc:HGNC:25176]	ENSG00000243667.7	WDR92	116143	0.926	2.86	121	7.44e-21	8.39e-20	20.1
19	29811991	29824312	12322	+	ENSG00000105173	CCNE1	protein_coding	chromosome	cyclin E1 [Source:HGNC Symbol;Acc:HGNC:1589]	ENSG00000105173.14	CCNE1	898	1.34	2.97	121	7.47e-21	8.43e-20	20.1
X	56818298	56995827	177530	-	ENSG00000204271	SPIN3	protein_coding	chromosome	spindlin family member 3 [Source:HGNC Symbol;Acc:HGNC:27272]	ENSG00000204271.13	SPIN3	169981	1.2	3.59	121	7.5e-21	8.45e-20	20.1
8	22578279	22598025	19747	+	ENSG00000120913	PDLIM2	protein_coding	chromosome	PDZ and LIM domain 2 [Source:HGNC Symbol;Acc:HGNC:13992]	ENSG00000120913.23	PDLIM2	64236	-1.5	5.9	121	7.58e-21	8.54e-20	20.1
20	3227417	3239559	12143	-	ENSG00000088836	SLC4A11	protein_coding	chromosome	solute carrier family 4 member 11 [Source:HGNC Symbol;Acc:HGNC:16438]	ENSG00000088836.14	SLC4A11	83959	2.66	3.5	121	7.66e-21	8.62e-20	20.1
1	241590102	241677376	87275	-	ENSG00000054277	OPN3	protein_coding	chromosome	opsin 3 [Source:HGNC Symbol;Acc:HGNC:14007]	ENSG00000054277.14	OPN3	23596	-1.66	4.73	121	8.03e-21	9.03e-20	20.1
12	50175788	50283546	107759	-	ENSG00000050405	LIMA1	protein_coding	chromosome	LIM domain and actin binding 1 [Source:HGNC Symbol;Acc:HGNC:24636]	ENSG00000050405.13	LIMA1	51474	-1.33	7.69	121	8.35e-21	9.38e-20	20.1
11	47565430	47573461	8032	+	ENSG00000110536	PTPMT1	protein_coding	chromosome	protein tyrosine phosphatase mitochondrial 1 [Source:HGNC Symbol;Acc:HGNC:26965]	ENSG00000110536.14	PTPMT1	114971	1.25	4.51	121	8.7e-21	9.77e-20	20.1
10	43606419	43617904	11486	+	ENSG00000198298	ZNF485	protein_coding	chromosome	zinc finger protein 485 [Source:HGNC Symbol;Acc:HGNC:23440]	ENSG00000198298.13	ZNF485	220992	1.67	1.07	121	9.04e-21	1.01e-19	20
3	58237532	58295693	58162	+	ENSG00000163686	ABHD6	protein_coding	chromosome	abhydrolase domain containing 6 [Source:HGNC Symbol;Acc:HGNC:21398]	ENSG00000163686.15	ABHD6	57406	-1.02	3.81	120	9.32e-21	1.05e-19	20
12	82223681	82358805	135125	-	ENSG00000133773	CCDC59	protein_coding	chromosome	coiled-coil domain containing 59 [Source:HGNC Symbol;Acc:HGNC:25005]	ENSG00000133773.12	CCDC59	29080	0.811	3.47	120	9.35e-21	1.05e-19	20
18	6941742	7117797	176056	-	ENSG00000101680	LAMA1	protein_coding	chromosome	laminin subunit alpha 1 [Source:HGNC Symbol;Acc:HGNC:6481]	ENSG00000101680.15	LAMA1	284217	-2.87	4.68	120	9.63e-21	1.08e-19	20
X	132626016	132961395	335380	-	ENSG00000171004	HS6ST2	protein_coding	chromosome	heparan sulfate 6-O-sulfotransferase 2 [Source:HGNC Symbol;Acc:HGNC:19133]	ENSG00000171004.18	HS6ST2	90161	3.86	2.22	120	9.74e-21	1.09e-19	20
8	143289676	143299952	10277	+	ENSG00000185730	ZNF696	protein_coding	chromosome	zinc finger protein 696 [Source:HGNC Symbol;Acc:HGNC:25872]	ENSG00000185730.8	ZNF696	79943	1.22	3.83	120	9.75e-21	1.09e-19	20
9	27325209	27529814	204606	-	ENSG00000120162	MOB3B	protein_coding	chromosome	MOB kinase activator 3B [Source:HGNC Symbol;Acc:HGNC:23825]	ENSG00000120162.10	MOB3B	79817	-1.38	5.42	120	9.96e-21	1.11e-19	20
2	130342225	130347810	5586	+	ENSG00000136718	IMP4	protein_coding	chromosome	IMP U3 small nucleolar ribonucleoprotein 4 [Source:HGNC Symbol;Acc:HGNC:30856]	ENSG00000136718.9	IMP4	92856	1.09	5.74	120	9.98e-21	1.11e-19	20
12	12813316	12829981	16666	+	ENSG00000213782	DDX47	protein_coding	chromosome	DEAD-box helicase 47 [Source:HGNC Symbol;Acc:HGNC:18682]	ENSG00000213782.7	DDX47	51202	0.682	4.84	120	9.98e-21	1.11e-19	20
11	57484534	57515780	31247	-	ENSG00000149150	SLC43A1	protein_coding	chromosome	solute carrier family 43 member 1 [Source:HGNC Symbol;Acc:HGNC:9225]	ENSG00000149150.9	SLC43A1	8501	1.83	4.02	120	1e-20	1.12e-19	20
19	2425625	2427586	1962	-	ENSG00000099800	TIMM13	protein_coding	chromosome	translocase of inner mitochondrial membrane 13 [Source:HGNC Symbol;Acc:HGNC:11816]	ENSG00000099800.8	TIMM13	26517	0.899	6.14	120	1.03e-20	1.15e-19	20
15	90083045	90102504	19460	-	ENSG00000182054	IDH2	protein_coding	chromosome	isocitrate dehydrogenase (NADP(+)) 2, mitochondrial [Source:HGNC Symbol;Acc:HGNC:5383]	ENSG00000182054.9	IDH2	3418	1.23	6.98	120	1.05e-20	1.17e-19	20
3	126607059	126655124	48066	-	ENSG00000197763	TXNRD3	protein_coding	chromosome	thioredoxin reductase 3 [Source:HGNC Symbol;Acc:HGNC:20667]	ENSG00000197763.17	TXNRD3	114112	1.86	2.03	120	1.06e-20	1.18e-19	20
1	1917590	1919279	1690	-	ENSG00000178821	TMEM52	protein_coding	chromosome	transmembrane protein 52 [Source:HGNC Symbol;Acc:HGNC:27916]	ENSG00000178821.13	TMEM52	339456	1.99	1.86	120	1.07e-20	1.19e-19	20
4	170060222	170091699	31478	-	ENSG00000109576	AADAT	protein_coding	chromosome	aminoadipate aminotransferase [Source:HGNC Symbol;Acc:HGNC:17929]	ENSG00000109576.14	AADAT	51166	1.97	2.3	120	1.08e-20	1.2e-19	20
1	230837119	230869589	32471	-	ENSG00000119280	C1orf198	protein_coding	chromosome	chromosome 1 open reading frame 198 [Source:HGNC Symbol;Acc:HGNC:25900]	ENSG00000119280.16	C1orf198	84886	1.5	4.69	120	1.08e-20	1.2e-19	20
5	90471748	90514557	42810	+	ENSG00000113356	POLR3G	protein_coding	chromosome	RNA polymerase III subunit G [Source:HGNC Symbol;Acc:HGNC:30075]	ENSG00000113356.12	POLR3G	10622	1.76	1.25	120	1.09e-20	1.21e-19	20
12	93677375	93894840	217466	+	ENSG00000169372	CRADD	protein_coding	chromosome	CASP2 and RIPK1 domain containing adaptor with death domain [Source:HGNC Symbol;Acc:HGNC:2340]	ENSG00000169372.13	CRADD	8738	-0.929	2.97	120	1.09e-20	1.21e-19	20
19	5674947	5691875	16929	+	ENSG00000130255	RPL36	protein_coding	chromosome	ribosomal protein L36 [Source:HGNC Symbol;Acc:HGNC:13631]	ENSG00000130255.13	RPL36	25873	1.06	8.36	120	1.1e-20	1.22e-19	20
3	184710364	184712064	1701	-	ENSG00000177383	MAGEF1	protein_coding	chromosome	MAGE family member F1 [Source:HGNC Symbol;Acc:HGNC:29639]	ENSG00000177383.5	MAGEF1	64110	1.15	4.4	120	1.11e-20	1.23e-19	20
17	1464186	1492686	28501	-	ENSG00000197879	MYO1C	protein_coding	chromosome	myosin IC [Source:HGNC Symbol;Acc:HGNC:7597]	ENSG00000197879.17	MYO1C	4641	-0.897	8.21	120	1.11e-20	1.23e-19	20
4	94451857	94668227	216371	+	ENSG00000163110	PDLIM5	protein_coding	chromosome	PDZ and LIM domain 5 [Source:HGNC Symbol;Acc:HGNC:17468]	ENSG00000163110.15	PDLIM5	10611	-0.852	6.25	120	1.12e-20	1.24e-19	20
11	57528464	57530803	2340	-	ENSG00000134809	TIMM10	protein_coding	chromosome	translocase of inner mitochondrial membrane 10 [Source:HGNC Symbol;Acc:HGNC:11814]	ENSG00000134809.9	TIMM10	26519	1.06	3.78	120	1.15e-20	1.27e-19	19.9
19	19629476	19643657	14182	-	ENSG00000089639	GMIP	protein_coding	chromosome	GEM interacting protein [Source:HGNC Symbol;Acc:HGNC:24852]	ENSG00000089639.11	GMIP	51291	-0.887	5.86	120	1.16e-20	1.28e-19	19.9
19	45349837	45370918	21082	-	ENSG00000104884	ERCC2	protein_coding	chromosome	ERCC excision repair 2, TFIIH core complex helicase subunit [Source:HGNC Symbol;Acc:HGNC:3434]	ENSG00000104884.15	ERCC2	2068	1.23	4.36	120	1.18e-20	1.3e-19	19.9
12	113157174	113185479	28306	-	ENSG00000123064	DDX54	protein_coding	chromosome	DEAD-box helicase 54 [Source:HGNC Symbol;Acc:HGNC:20084]	ENSG00000123064.12	DDX54	79039	0.992	6.41	120	1.2e-20	1.32e-19	19.9
16	85027751	85094230	66480	+	ENSG00000135709	KIAA0513	protein_coding	chromosome	KIAA0513 [Source:HGNC Symbol;Acc:HGNC:29058]	ENSG00000135709.12	KIAA0513	9764	-1.33	4.91	119	1.22e-20	1.35e-19	19.9
6	45880827	46080348	199522	-	ENSG00000112782	CLIC5	protein_coding	chromosome	chloride intracellular channel 5 [Source:HGNC Symbol;Acc:HGNC:13517]	ENSG00000112782.18	CLIC5	53405	-2.2	7.24	119	1.25e-20	1.38e-19	19.9
X	14008279	14029893	21615	-	ENSG00000046647	GEMIN8	protein_coding	chromosome	gem nuclear organelle associated protein 8 [Source:HGNC Symbol;Acc:HGNC:26044]	ENSG00000046647.13	GEMIN8	54960	0.897	3.44	119	1.3e-20	1.43e-19	19.9
11	123723914	123741675	17762	-	ENSG00000166261	ZNF202	protein_coding	chromosome	zinc finger protein 202 [Source:HGNC Symbol;Acc:HGNC:12994]	ENSG00000166261.11	ZNF202	7753	1.21	3.58	119	1.32e-20	1.45e-19	19.9
4	87336515	87391188	54674	-	ENSG00000198189	HSD17B11	protein_coding	chromosome	hydroxysteroid 17-beta dehydrogenase 11 [Source:HGNC Symbol;Acc:HGNC:22960]	ENSG00000198189.11	HSD17B11	51170	-1.45	6.76	119	1.34e-20	1.48e-19	19.9
22	29327680	29423179	95500	-	ENSG00000100280	AP1B1	protein_coding	chromosome	adaptor related protein complex 1 subunit beta 1 [Source:HGNC Symbol;Acc:HGNC:554]	ENSG00000100280.16	AP1B1	162	-0.706	7.08	119	1.37e-20	1.51e-19	19.9
14	73644875	73703732	58858	+	ENSG00000119661	DNAL1	protein_coding	chromosome	dynein axonemal light chain 1 [Source:HGNC Symbol;Acc:HGNC:23247]	ENSG00000119661.15	DNAL1	83544	1.68	4.2	119	1.45e-20	1.59e-19	19.8
X	103675496	103688158	12663	-	ENSG00000123562	MORF4L2	protein_coding	chromosome	mortality factor 4 like 2 [Source:HGNC Symbol;Acc:HGNC:16849]	ENSG00000123562.17	MORF4L2	9643	0.789	6.77	119	1.45e-20	1.59e-19	19.8
2	32628032	32821051	193020	+	ENSG00000018699	TTC27	protein_coding	chromosome	tetratricopeptide repeat domain 27 [Source:HGNC Symbol;Acc:HGNC:25986]	ENSG00000018699.13	TTC27	55622	1.45	3.17	119	1.46e-20	1.6e-19	19.8
2	152335174	152649826	314653	+	ENSG00000157827	FMNL2	protein_coding	chromosome	formin like 2 [Source:HGNC Symbol;Acc:HGNC:18267]	ENSG00000157827.20	FMNL2	114793	1.22	4.75	119	1.47e-20	1.61e-19	19.8
11	33077188	33162371	85184	-	ENSG00000176102	CSTF3	protein_coding	chromosome	cleavage stimulation factor subunit 3 [Source:HGNC Symbol;Acc:HGNC:2485]	ENSG00000176102.13	CSTF3	1479	0.749	4.15	119	1.49e-20	1.63e-19	19.8
1	54779712	54801323	21612	-	ENSG00000006555	TTC22	protein_coding	chromosome	tetratricopeptide repeat domain 22 [Source:HGNC Symbol;Acc:HGNC:26067]	ENSG00000006555.11	TTC22	55001	-2.04	6.66	119	1.51e-20	1.66e-19	19.8
11	74988279	75018893	30615	+	ENSG00000162139	NEU3	protein_coding	chromosome	neuraminidase 3 [Source:HGNC Symbol;Acc:HGNC:7760]	ENSG00000162139.10	NEU3	10825	1.1	3.43	119	1.54e-20	1.69e-19	19.8
9	97412096	97496125	84030	+	ENSG00000196116	TDRD7	protein_coding	chromosome	tudor domain containing 7 [Source:HGNC Symbol;Acc:HGNC:30831]	ENSG00000196116.8	TDRD7	23424	-1.05	4.85	119	1.56e-20	1.71e-19	19.8
6	36676460	36687339	10880	+	ENSG00000124762	CDKN1A	protein_coding	chromosome	cyclin dependent kinase inhibitor 1A [Source:HGNC Symbol;Acc:HGNC:1784]	ENSG00000124762.13	CDKN1A	1026	-1.59	8.44	119	1.58e-20	1.72e-19	19.8
16	56451521	56479104	27584	+	ENSG00000087263	OGFOD1	protein_coding	chromosome	2-oxoglutarate and iron dependent oxygenase domain containing 1 [Source:HGNC Symbol;Acc:HGNC:25585]	ENSG00000087263.17	OGFOD1	55239	1.13	4.18	118	1.61e-20	1.75e-19	19.8
12	120196699	120201235	4537	-	ENSG00000089157	RPLP0	protein_coding	chromosome	ribosomal protein lateral stalk subunit P0 [Source:HGNC Symbol;Acc:HGNC:10371]	ENSG00000089157.16	RPLP0	6175	1.11	10.4	118	1.63e-20	1.77e-19	19.8
17	42609683	42615238	5556	+	ENSG00000131462	TUBG1	protein_coding	chromosome	tubulin gamma 1 [Source:HGNC Symbol;Acc:HGNC:12417]	ENSG00000131462.8	TUBG1	7283	1	4.71	118	1.63e-20	1.78e-19	19.8
11	65773898	65780976	7079	-	ENSG00000254470	AP5B1	protein_coding	chromosome	adaptor related protein complex 5 subunit beta 1 [Source:HGNC Symbol;Acc:HGNC:25104]	ENSG00000254470.3	AP5B1	91056	-0.736	5.5	118	1.64e-20	1.79e-19	19.8
12	67648338	67665406	17069	+	ENSG00000127334	DYRK2	protein_coding	chromosome	dual specificity tyrosine phosphorylation regulated kinase 2 [Source:HGNC Symbol;Acc:HGNC:3093]	ENSG00000127334.10	DYRK2	8445	-1.47	6.76	118	1.67e-20	1.82e-19	19.8
5	60945205	61153026	207822	+	ENSG00000164182	NDUFAF2	protein_coding	chromosome	NADH:ubiquinone oxidoreductase complex assembly factor 2 [Source:HGNC Symbol;Acc:HGNC:28086]	ENSG00000164182.11	NDUFAF2	91942	1.39	3.04	118	1.72e-20	1.87e-19	19.8
19	16111889	16134234	22346	+	ENSG00000167461	RAB8A	protein_coding	chromosome	RAB8A, member RAS oncogene family [Source:HGNC Symbol;Acc:HGNC:7007]	ENSG00000167461.12	RAB8A	4218	-0.865	6.55	118	1.74e-20	1.89e-19	19.8
12	55725323	55729707	4385	-	ENSG00000135404	CD63	protein_coding	chromosome	CD63 molecule [Source:HGNC Symbol;Acc:HGNC:1692]	ENSG00000135404.11	CD63	967	-0.729	9.03	118	1.75e-20	1.9e-19	19.8
10	78033760	78056813	23054	+	ENSG00000138326	RPS24	protein_coding	chromosome	ribosomal protein S24 [Source:HGNC Symbol;Acc:HGNC:10411]	ENSG00000138326.20	RPS24	6229	1	9.06	118	1.75e-20	1.9e-19	19.8
17	50426158	50474845	48688	+	ENSG00000167107	ACSF2	protein_coding	chromosome	acyl-CoA synthetase family member 2 [Source:HGNC Symbol;Acc:HGNC:26101]	ENSG00000167107.12	ACSF2	80221	-1.53	6.1	118	1.75e-20	1.9e-19	19.8
11	111878935	111885975	7041	+	ENSG00000137720	C11orf1	protein_coding	chromosome	chromosome 11 open reading frame 1 [Source:HGNC Symbol;Acc:HGNC:1163]	ENSG00000137720.8	C11orf1	64776	1.28	2.81	118	1.77e-20	1.92e-19	19.8
12	49064676	49070025	5350	-	ENSG00000167550	RHEBL1	protein_coding	chromosome	RHEB like 1 [Source:HGNC Symbol;Acc:HGNC:21166]	ENSG00000167550.11	RHEBL1	121268	1.63	0.317	118	1.79e-20	1.94e-19	19.7
3	40457292	40468587	11296	+	ENSG00000188846	RPL14	protein_coding	chromosome	ribosomal protein L14 [Source:HGNC Symbol;Acc:HGNC:10305]	ENSG00000188846.14	RPL14	9045	1.08	8.84	118	1.88e-20	2.04e-19	19.7
1	11054584	11060020	5437	-	ENSG00000116649	SRM	protein_coding	chromosome	spermidine synthase [Source:HGNC Symbol;Acc:HGNC:11296]	ENSG00000116649.10	SRM	6723	1.68	5.41	118	1.96e-20	2.12e-19	19.7
1	37793802	37801137	7336	+	ENSG00000185090	MANEAL	protein_coding	chromosome	mannosidase endo-alpha like [Source:HGNC Symbol;Acc:HGNC:26452]	ENSG00000185090.14	MANEAL	149175	1.74	3.33	118	1.96e-20	2.12e-19	19.7
19	55181247	55209506	28260	-	ENSG00000080031	PTPRH	protein_coding	chromosome	protein tyrosine phosphatase receptor type H [Source:HGNC Symbol;Acc:HGNC:9672]	ENSG00000080031.10	PTPRH	5794	-2.25	7.53	118	2e-20	2.16e-19	19.7
3	133598175	133662380	64206	-	ENSG00000163781	TOPBP1	protein_coding	chromosome	DNA topoisomerase II binding protein 1 [Source:HGNC Symbol;Acc:HGNC:17008]	ENSG00000163781.14	TOPBP1	11073	0.932	4.94	118	2e-20	2.16e-19	19.7
19	571277	583493	12217	+	ENSG00000172270	BSG	protein_coding	chromosome	basigin (Ok blood group) [Source:HGNC Symbol;Acc:HGNC:1116]	ENSG00000172270.19	BSG	682	-1.12	9.56	118	2.01e-20	2.17e-19	19.7
19	32691961	32713796	21836	+	ENSG00000213965	NUDT19	protein_coding	chromosome	nudix hydrolase 19 [Source:HGNC Symbol;Acc:HGNC:32036]	ENSG00000213965.3	NUDT19	390916	0.907	4.02	118	2.01e-20	2.17e-19	19.7
1	1598012	1600135	2124	-	ENSG00000228594	FNDC10	protein_coding	chromosome	fibronectin type III domain containing 10 [Source:HGNC Symbol;Acc:HGNC:42951]	ENSG00000228594.4	FNDC10	643988	1.87	3.03	118	2.01e-20	2.17e-19	19.7
1	1471765	1497848	26084	+	ENSG00000160072	ATAD3B	protein_coding	chromosome	ATPase family AAA domain containing 3B [Source:HGNC Symbol;Acc:HGNC:24007]	ENSG00000160072.20	ATAD3B	83858	1.03	6.24	118	2.02e-20	2.17e-19	19.7
19	41425359	41428730	3372	-	ENSG00000177191	B3GNT8	protein_coding	chromosome	UDP-GlcNAc:betaGal beta-1,3-N-acetylglucosaminyltransferase 8 [Source:HGNC Symbol;Acc:HGNC:24139]	ENSG00000177191.2	B3GNT8	374907	-1.69	5.63	118	2.03e-20	2.19e-19	19.7
11	114439386	114450279	10894	+	ENSG00000076043	REXO2	protein_coding	chromosome	RNA exonuclease 2 [Source:HGNC Symbol;Acc:HGNC:17851]	ENSG00000076043.10	REXO2	25996	1.21	4.78	118	2.04e-20	2.19e-19	19.7
16	20806429	20849668	43240	+	ENSG00000005189	REXO5	protein_coding	chromosome	RNA exonuclease 5 [Source:HGNC Symbol;Acc:HGNC:24661]	ENSG00000005189.19	REXO5	81691	1.28	1.85	117	2.14e-20	2.3e-19	19.7
1	204617170	204685738	68569	-	ENSG00000170382	LRRN2	protein_coding	chromosome	leucine rich repeat neuronal 2 [Source:HGNC Symbol;Acc:HGNC:16914]	ENSG00000170382.12	LRRN2	10446	-3.25	5	117	2.14e-20	2.3e-19	19.7
19	43727983	43754962	26980	-	ENSG00000105771	SMG9	protein_coding	chromosome	SMG9 nonsense mediated mRNA decay factor [Source:HGNC Symbol;Acc:HGNC:25763]	ENSG00000105771.14	SMG9	56006	0.978	4.97	117	2.15e-20	2.31e-19	19.7
19	41796587	41811554	14968	+	ENSG00000170956	CEACAM3	protein_coding	chromosome	carcinoembryonic antigen related cell adhesion molecule 3 [Source:HGNC Symbol;Acc:HGNC:1815]	ENSG00000170956.17	CEACAM3	1084	-2.02	1.92	117	2.16e-20	2.32e-19	19.7
7	75986831	75994656	7826	-	ENSG00000189077	TMEM120A	protein_coding	chromosome	transmembrane protein 120A [Source:HGNC Symbol;Acc:HGNC:21697]	ENSG00000189077.11	TMEM120A	83862	-1.16	6.26	117	2.18e-20	2.33e-19	19.7
3	160399274	160434954	35681	+	ENSG00000113810	SMC4	protein_coding	chromosome	structural maintenance of chromosomes 4 [Source:HGNC Symbol;Acc:HGNC:14013]	ENSG00000113810.16	SMC4	10051	1.15	5.41	117	2.21e-20	2.37e-19	19.7
3	97941818	97972457	30640	-	ENSG00000170854	RIOX2	protein_coding	chromosome	ribosomal oxygenase 2 [Source:HGNC Symbol;Acc:HGNC:19441]	ENSG00000170854.18	RIOX2	84864	1.23	4.23	117	2.23e-20	2.38e-19	19.7
1	50437028	50960267	523240	-	ENSG00000185104	FAF1	protein_coding	chromosome	Fas associated factor 1 [Source:HGNC Symbol;Acc:HGNC:3578]	ENSG00000185104.20	FAF1	11124	0.971	4.83	117	2.32e-20	2.49e-19	19.6
6	122789049	122809720	20672	+	ENSG00000172594	SMPDL3A	protein_coding	chromosome	sphingomyelin phosphodiesterase acid like 3A [Source:HGNC Symbol;Acc:HGNC:17389]	ENSG00000172594.13	SMPDL3A	10924	-2.49	6.23	117	2.34e-20	2.51e-19	19.6
1	109309568	109397918	88351	-	ENSG00000134243	SORT1	protein_coding	chromosome	sortilin 1 [Source:HGNC Symbol;Acc:HGNC:11186]	ENSG00000134243.12	SORT1	6272	-1.01	6.56	117	2.42e-20	2.58e-19	19.6
15	51952106	52067375	115270	+	ENSG00000069956	MAPK6	protein_coding	chromosome	mitogen-activated protein kinase 6 [Source:HGNC Symbol;Acc:HGNC:6879]	ENSG00000069956.12	MAPK6	5597	-1.3	5.68	117	2.44e-20	2.61e-19	19.6
20	50888916	50931437	42522	-	ENSG00000101126	ADNP	protein_coding	chromosome	activity dependent neuroprotector homeobox [Source:HGNC Symbol;Acc:HGNC:15766]	ENSG00000101126.17	ADNP	23394	0.814	6.02	117	2.45e-20	2.61e-19	19.6
6	42564062	42693504	129443	+	ENSG00000024048	UBR2	protein_coding	chromosome	ubiquitin protein ligase E3 component n-recognin 2 [Source:HGNC Symbol;Acc:HGNC:21289]	ENSG00000024048.10	UBR2	23304	-0.874	5.76	117	2.46e-20	2.62e-19	19.6
X	101397803	101408012	10210	-	ENSG00000102393	GLA	protein_coding	chromosome	galactosidase alpha [Source:HGNC Symbol;Acc:HGNC:4296]	ENSG00000102393.10	GLA	2717	1.08	3.93	117	2.46e-20	2.62e-19	19.6
X	53532096	53686728	154633	-	ENSG00000086758	HUWE1	protein_coding	chromosome	HECT, UBA and WWE domain containing E3 ubiquitin protein ligase 1 [Source:HGNC Symbol;Acc:HGNC:30892]	ENSG00000086758.16	HUWE1	10075	0.697	7.23	117	2.52e-20	2.68e-19	19.6
16	1771890	1773155	1266	-	ENSG00000074071	MRPS34	protein_coding	chromosome	mitochondrial ribosomal protein S34 [Source:HGNC Symbol;Acc:HGNC:16618]	ENSG00000074071.14	MRPS34	65993	0.872	6.36	117	2.57e-20	2.74e-19	19.6
1	28259518	28282491	22974	+	ENSG00000130766	SESN2	protein_coding	chromosome	sestrin 2 [Source:HGNC Symbol;Acc:HGNC:20746]	ENSG00000130766.5	SESN2	83667	-1.09	5.17	117	2.6e-20	2.76e-19	19.6
22	17734138	17774770	40633	-	ENSG00000015475	BID	protein_coding	chromosome	BH3 interacting domain death agonist [Source:HGNC Symbol;Acc:HGNC:1050]	ENSG00000015475.18	BID	637	1.07	4.74	117	2.62e-20	2.78e-19	19.6
2	70295975	70302090	6116	-	ENSG00000035141	FAM136A	protein_coding	chromosome	family with sequence similarity 136 member A [Source:HGNC Symbol;Acc:HGNC:25911]	ENSG00000035141.8	FAM136A	84908	0.741	5.36	117	2.62e-20	2.79e-19	19.6
17	4538897	4555631	16735	-	ENSG00000132382	MYBBP1A	protein_coding	chromosome	MYB binding protein 1a [Source:HGNC Symbol;Acc:HGNC:7546]	ENSG00000132382.14	MYBBP1A	10514	1.06	6.17	117	2.62e-20	2.78e-19	19.6
1	20499448	20508151	8704	-	ENSG00000090432	MUL1	protein_coding	chromosome	mitochondrial E3 ubiquitin protein ligase 1 [Source:HGNC Symbol;Acc:HGNC:25762]	ENSG00000090432.7	MUL1	79594	-0.846	5.05	117	2.66e-20	2.82e-19	19.6
3	184135038	184146127	11090	+	ENSG00000145191	EIF2B5	protein_coding	chromosome	eukaryotic translation initiation factor 2B subunit epsilon [Source:HGNC Symbol;Acc:HGNC:3261]	ENSG00000145191.15	EIF2B5	8893	0.563	5.78	117	2.7e-20	2.86e-19	19.6
17	8159149	8163546	4398	-	ENSG00000220205	VAMP2	protein_coding	chromosome	vesicle associated membrane protein 2 [Source:HGNC Symbol;Acc:HGNC:12643]	ENSG00000220205.9	VAMP2	6844	-0.897	5.79	117	2.7e-20	2.87e-19	19.6
11	12094008	12359144	265137	+	ENSG00000133816	MICAL2	protein_coding	chromosome	microtubule associated monooxygenase, calponin and LIM domain containing 2 [Source:HGNC Symbol;Acc:HGNC:24693]	ENSG00000133816.15	MICAL2	9645	-1.29	7.6	117	2.74e-20	2.9e-19	19.6
11	67791648	67805336	13689	-	ENSG00000160172	FAM86C2P	transcribed_unprocessed_pseudogene	chromosome	family with sequence similarity 86 member C2, pseudogene [Source:HGNC Symbol;Acc:HGNC:42392]	ENSG00000160172.10	FAM86C2P	NA	1.45	2.06	116	2.82e-20	2.99e-19	19.5
1	28329002	28335965	6964	+	ENSG00000130772	MED18	protein_coding	chromosome	mediator complex subunit 18 [Source:HGNC Symbol;Acc:HGNC:25944]	ENSG00000130772.14	MED18	54797	-0.903	4.2	116	2.94e-20	3.11e-19	19.5
3	16802651	17090604	287954	+	ENSG00000154822	PLCL2	protein_coding	chromosome	phospholipase C like 2 [Source:HGNC Symbol;Acc:HGNC:9064]	ENSG00000154822.18	PLCL2	23228	-1.88	4.01	116	2.94e-20	3.11e-19	19.5
22	41673933	41690504	16572	-	ENSG00000100138	SNU13	protein_coding	chromosome	small nuclear ribonucleoprotein 13 [Source:HGNC Symbol;Acc:HGNC:7819]	ENSG00000100138.15	SNU13	4809	1	5.88	116	2.99e-20	3.16e-19	19.5
X	100913445	100929433	15989	-	ENSG00000182489	XKRX	protein_coding	chromosome	XK related X-linked [Source:HGNC Symbol;Acc:HGNC:29845]	ENSG00000182489.9	XKRX	402415	2.49	1.39	116	3.01e-20	3.18e-19	19.5
10	17752201	17800868	48668	+	ENSG00000148483	TMEM236	protein_coding	chromosome	transmembrane protein 236 [Source:HGNC Symbol;Acc:HGNC:23473]	ENSG00000148483.9	TMEM236	653567	-2.49	5.9	116	3.03e-20	3.2e-19	19.5
7	128862856	128865847	2992	+	ENSG00000128524	ATP6V1F	protein_coding	chromosome	ATPase H+ transporting V1 subunit F [Source:HGNC Symbol;Acc:HGNC:16832]	ENSG00000128524.5	ATP6V1F	9296	0.785	5.66	116	3.15e-20	3.33e-19	19.5
3	133784023	133825772	41750	+	ENSG00000144867	SRPRB	protein_coding	chromosome	SRP receptor subunit beta [Source:HGNC Symbol;Acc:HGNC:24085]	ENSG00000144867.12	SRPRB	58477	1.47	4.99	116	3.22e-20	3.39e-19	19.5
6	10393186	10419659	26474	-	ENSG00000137203	TFAP2A	protein_coding	chromosome	transcription factor AP-2 alpha [Source:HGNC Symbol;Acc:HGNC:11742]	ENSG00000137203.12	TFAP2A	7020	3.24	2.28	116	3.29e-20	3.46e-19	19.5
22	17084954	17115694	30741	+	ENSG00000177663	IL17RA	protein_coding	chromosome	interleukin 17 receptor A [Source:HGNC Symbol;Acc:HGNC:5985]	ENSG00000177663.13	IL17RA	23765	-0.778	5.33	116	3.3e-20	3.47e-19	19.5
11	33075566	33076460	895	-	ENSG00000213713	PIGCP1	processed_pseudogene	chromosome	phosphatidylinositol glycan anchor biosynthesis class C pseudogene 1 [Source:HGNC Symbol;Acc:HGNC:8961]	ENSG00000213713.3	PIGCP1	NA	-1.73	1.77	116	3.32e-20	3.5e-19	19.5
10	95237572	95291012	53441	-	ENSG00000107438	PDLIM1	protein_coding	chromosome	PDZ and LIM domain 1 [Source:HGNC Symbol;Acc:HGNC:2067]	ENSG00000107438.9	PDLIM1	9124	-1.09	8.1	116	3.33e-20	3.5e-19	19.5
1	92246402	92298987	52586	-	ENSG00000174842	GLMN	protein_coding	chromosome	glomulin, FKBP associated protein [Source:HGNC Symbol;Acc:HGNC:14373]	ENSG00000174842.17	GLMN	11146	1.2	1.63	116	3.34e-20	3.51e-19	19.5
1	40040233	40072649	32417	+	ENSG00000131236	CAP1	protein_coding	chromosome	cyclase associated actin cytoskeleton regulatory protein 1 [Source:HGNC Symbol;Acc:HGNC:20040]	ENSG00000131236.17	CAP1	10487	-0.915	8.36	116	3.41e-20	3.58e-19	19.5
10	70404145	70428618	24474	+	ENSG00000148730	EIF4EBP2	protein_coding	chromosome	eukaryotic translation initiation factor 4E binding protein 2 [Source:HGNC Symbol;Acc:HGNC:3289]	ENSG00000148730.7	EIF4EBP2	1979	-0.946	7.46	116	3.42e-20	3.59e-19	19.5
X	119786504	119791630	5127	-	ENSG00000198918	RPL39	protein_coding	chromosome	ribosomal protein L39 [Source:HGNC Symbol;Acc:HGNC:10350]	ENSG00000198918.8	RPL39	6170	1.37	8.14	116	3.47e-20	3.63e-19	19.5
11	34150987	34358010	207024	-	ENSG00000166016	ABTB2	protein_coding	chromosome	ankyrin repeat and BTB domain containing 2 [Source:HGNC Symbol;Acc:HGNC:23842]	ENSG00000166016.6	ABTB2	25841	-1.49	5.26	116	3.53e-20	3.69e-19	19.5
16	28259246	28323849	64604	+	ENSG00000188322	SBK1	protein_coding	chromosome	SH3 domain binding kinase 1 [Source:HGNC Symbol;Acc:HGNC:17699]	ENSG00000188322.7	SBK1	388228	2.66	2.21	116	3.53e-20	3.69e-19	19.5
8	22544986	22575788	30803	+	ENSG00000120896	SORBS3	protein_coding	chromosome	sorbin and SH3 domain containing 3 [Source:HGNC Symbol;Acc:HGNC:30907]	ENSG00000120896.13	SORBS3	10174	-1.08	6.8	116	3.57e-20	3.74e-19	19.4
12	55966781	55972789	6009	+	ENSG00000123374	CDK2	protein_coding	chromosome	cyclin dependent kinase 2 [Source:HGNC Symbol;Acc:HGNC:1771]	ENSG00000123374.11	CDK2	1017	1.38	4.68	116	3.65e-20	3.81e-19	19.4
1	59296638	59810647	514010	+	ENSG00000172456	FGGY	protein_coding	chromosome	FGGY carbohydrate kinase domain containing [Source:HGNC Symbol;Acc:HGNC:25610]	ENSG00000172456.17	FGGY	55277	2.55	3.45	115	3.7e-20	3.86e-19	19.4
3	170864875	170870208	5334	-	ENSG00000163584	RPL22L1	protein_coding	chromosome	ribosomal protein L22 like 1 [Source:HGNC Symbol;Acc:HGNC:27610]	ENSG00000163584.18	RPL22L1	200916	1.88	4.27	115	3.72e-20	3.89e-19	19.4
6	7107597	7251980	144384	+	ENSG00000124782	RREB1	protein_coding	chromosome	ras responsive element binding protein 1 [Source:HGNC Symbol;Acc:HGNC:10449]	ENSG00000124782.20	RREB1	6239	-0.885	6.45	115	3.77e-20	3.94e-19	19.4
16	68021274	68023442	2169	-	ENSG00000182810	DDX28	protein_coding	chromosome	DEAD-box helicase 28 [Source:HGNC Symbol;Acc:HGNC:17330]	ENSG00000182810.6	DDX28	55794	1.28	3.44	115	3.77e-20	3.94e-19	19.4
20	6006093	6040053	33961	+	ENSG00000088766	CRLS1	protein_coding	chromosome	cardiolipin synthase 1 [Source:HGNC Symbol;Acc:HGNC:16148]	ENSG00000088766.12	CRLS1	54675	1.08	5.41	115	3.86e-20	4.02e-19	19.4
15	72199029	72231822	32794	-	ENSG00000067225	PKM	protein_coding	chromosome	pyruvate kinase M1/2 [Source:HGNC Symbol;Acc:HGNC:9021]	ENSG00000067225.18	PKM	5315	0.935	9.15	115	3.88e-20	4.04e-19	19.4
11	1752755	1764573	11819	-	ENSG00000117984	CTSD	protein_coding	chromosome	cathepsin D [Source:HGNC Symbol;Acc:HGNC:2529]	ENSG00000117984.14	CTSD	1509	-1.27	10.1	115	3.9e-20	4.06e-19	19.4
8	133191039	133231690	40652	+	ENSG00000104415	CCN4	protein_coding	chromosome	cellular communication network factor 4 [Source:HGNC Symbol;Acc:HGNC:12769]	ENSG00000104415.14	CCN4	8840	2.71	2.24	115	3.91e-20	4.07e-19	19.4
5	140639427	140645408	5982	+	ENSG00000113119	TMCO6	protein_coding	chromosome	transmembrane and coiled-coil domains 6 [Source:HGNC Symbol;Acc:HGNC:28814]	ENSG00000113119.12	TMCO6	55374	0.902	3.71	115	3.98e-20	4.13e-19	19.4
10	101131300	101137789	6490	+	ENSG00000107807	TLX1	protein_coding	chromosome	T cell leukemia homeobox 1 [Source:HGNC Symbol;Acc:HGNC:5056]	ENSG00000107807.13	TLX1	3195	3.57	1.87	115	4e-20	4.16e-19	19.4
1	95117355	95197607	80253	+	ENSG00000152078	TLCD4	protein_coding	chromosome	TLC domain containing 4 [Source:HGNC Symbol;Acc:HGNC:26477]	ENSG00000152078.10	TLCD4	148534	-1.88	5.28	115	4.01e-20	4.17e-19	19.4
7	129225023	129430211	205189	+	ENSG00000158467	AHCYL2	protein_coding	chromosome	adenosylhomocysteinase like 2 [Source:HGNC Symbol;Acc:HGNC:22204]	ENSG00000158467.16	AHCYL2	23382	-2.37	8.22	115	4.08e-20	4.23e-19	19.4
5	52989340	53094779	105440	+	ENSG00000164171	ITGA2	protein_coding	chromosome	integrin subunit alpha 2 [Source:HGNC Symbol;Acc:HGNC:6137]	ENSG00000164171.11	ITGA2	3673	1.99	4.87	115	4.17e-20	4.33e-19	19.4
6	57314805	57646850	332046	+	ENSG00000146143	PRIM2	protein_coding	chromosome	DNA primase subunit 2 [Source:HGNC Symbol;Acc:HGNC:9370]	ENSG00000146143.19	PRIM2	5558	1.08	2.87	115	4.2e-20	4.35e-19	19.4
13	94601857	94634661	32805	+	ENSG00000152749	GPR180	protein_coding	chromosome	G protein-coupled receptor 180 [Source:HGNC Symbol;Acc:HGNC:28899]	ENSG00000152749.8	GPR180	160897	1.28	3.04	115	4.2e-20	4.35e-19	19.4
12	27710822	27756295	45474	+	ENSG00000061794	MRPS35	protein_coding	chromosome	mitochondrial ribosomal protein S35 [Source:HGNC Symbol;Acc:HGNC:16635]	ENSG00000061794.13	MRPS35	60488	1.1	5.28	115	4.27e-20	4.42e-19	19.4
2	10439968	10448327	8360	-	ENSG00000115758	ODC1	protein_coding	chromosome	ornithine decarboxylase 1 [Source:HGNC Symbol;Acc:HGNC:8109]	ENSG00000115758.13	ODC1	4953	1.56	6.5	115	4.28e-20	4.43e-19	19.4
22	42058334	42070842	12509	-	ENSG00000198951	NAGA	protein_coding	chromosome	alpha-N-acetylgalactosaminidase [Source:HGNC Symbol;Acc:HGNC:7631]	ENSG00000198951.12	NAGA	4668	-0.875	5.39	115	4.39e-20	4.54e-19	19.4
15	40331452	40340967	9516	-	ENSG00000188549	CCDC9B	protein_coding	chromosome	coiled-coil domain containing 9B [Source:HGNC Symbol;Acc:HGNC:33488]	ENSG00000188549.12	CCDC9B	388115	-1.51	6.08	115	4.41e-20	4.55e-19	19.4
4	74036589	74038807	2219	-	ENSG00000163734	CXCL3	protein_coding	chromosome	C-X-C motif chemokine ligand 3 [Source:HGNC Symbol;Acc:HGNC:4604]	ENSG00000163734.4	CXCL3	2921	2.83	5.38	115	4.45e-20	4.59e-19	19.4
15	89677764	89690783	13020	-	ENSG00000166821	PEX11A	protein_coding	chromosome	peroxisomal biogenesis factor 11 alpha [Source:HGNC Symbol;Acc:HGNC:8852]	ENSG00000166821.9	PEX11A	8800	-1.11	3.73	115	4.46e-20	4.6e-19	19.4
14	53949736	53958761	9026	-	ENSG00000125378	BMP4	protein_coding	chromosome	bone morphogenetic protein 4 [Source:HGNC Symbol;Acc:HGNC:1071]	ENSG00000125378.16	BMP4	652	1.85	5.2	115	4.65e-20	4.79e-19	19.3
1	43978943	43991170	12228	+	ENSG00000117411	B4GALT2	protein_coding	chromosome	beta-1,4-galactosyltransferase 2 [Source:HGNC Symbol;Acc:HGNC:925]	ENSG00000117411.16	B4GALT2	8704	1.21	5.39	115	4.66e-20	4.8e-19	19.3
2	232456125	232460753	4629	+	ENSG00000163295	ALPI	protein_coding	chromosome	alkaline phosphatase, intestinal [Source:HGNC Symbol;Acc:HGNC:437]	ENSG00000163295.5	ALPI	248	-3.33	5	115	4.69e-20	4.83e-19	19.3
7	150824627	150861504	36878	+	ENSG00000002726	AOC1	protein_coding	chromosome	amine oxidase copper containing 1 [Source:HGNC Symbol;Acc:HGNC:80]	ENSG00000002726.20	AOC1	26	-2.06	8.71	115	4.74e-20	4.87e-19	19.3
16	3024027	3027755	3729	+	ENSG00000131652	THOC6	protein_coding	chromosome	THO complex 6 [Source:HGNC Symbol;Acc:HGNC:28369]	ENSG00000131652.14	THOC6	79228	0.969	4.84	114	4.93e-20	5.07e-19	19.3
6	38675925	38703145	27221	-	ENSG00000124767	GLO1	protein_coding	chromosome	glyoxalase I [Source:HGNC Symbol;Acc:HGNC:4323]	ENSG00000124767.7	GLO1	2739	1.05	5.56	114	5.12e-20	5.26e-19	19.3
6	52361421	52407777	46357	+	ENSG00000170915	PAQR8	protein_coding	chromosome	progestin and adipoQ receptor family member 8 [Source:HGNC Symbol;Acc:HGNC:15708]	ENSG00000170915.9	PAQR8	85315	-1.94	7.06	114	5.14e-20	5.28e-19	19.3
7	88205118	88226993	21876	-	ENSG00000075142	SRI	protein_coding	chromosome	sorcin [Source:HGNC Symbol;Acc:HGNC:11292]	ENSG00000075142.13	SRI	6717	-1.72	8.13	114	5.17e-20	5.31e-19	19.3
19	4343527	4360086	16560	+	ENSG00000008382	MPND	protein_coding	chromosome	MPN domain containing [Source:HGNC Symbol;Acc:HGNC:25934]	ENSG00000008382.15	MPND	84954	-0.996	5.36	114	5.25e-20	5.38e-19	19.3
9	129094794	129111189	16396	-	ENSG00000095321	CRAT	protein_coding	chromosome	carnitine O-acetyltransferase [Source:HGNC Symbol;Acc:HGNC:2342]	ENSG00000095321.17	CRAT	1384	-1.24	6.16	114	5.53e-20	5.67e-19	19.3
11	790475	798281	7807	-	ENSG00000177542	SLC25A22	protein_coding	chromosome	solute carrier family 25 member 22 [Source:HGNC Symbol;Acc:HGNC:19954]	ENSG00000177542.11	SLC25A22	79751	1.16	5.01	114	5.67e-20	5.81e-19	19.2
19	1609290	1652615	43326	-	ENSG00000071564	TCF3	protein_coding	chromosome	transcription factor 3 [Source:HGNC Symbol;Acc:HGNC:11633]	ENSG00000071564.16	TCF3	6929	0.898	6.62	114	5.76e-20	5.9e-19	19.2
3	121769761	121835079	65319	-	ENSG00000173226	IQCB1	protein_coding	chromosome	IQ motif containing B1 [Source:HGNC Symbol;Acc:HGNC:28949]	ENSG00000173226.17	IQCB1	9657	0.976	3.9	114	5.82e-20	5.96e-19	19.2
18	11851413	11854444	3032	+	ENSG00000255112	CHMP1B	protein_coding	chromosome	charged multivesicular body protein 1B [Source:HGNC Symbol;Acc:HGNC:24287]	ENSG00000255112.3	CHMP1B	57132	-1.12	6.53	114	5.87e-20	6e-19	19.2
11	67403915	67410089	6175	+	ENSG00000175463	TBC1D10C	protein_coding	chromosome	TBC1 domain family member 10C [Source:HGNC Symbol;Acc:HGNC:24702]	ENSG00000175463.12	TBC1D10C	374403	-1.7	4.07	114	5.94e-20	6.07e-19	19.2
1	225401502	225428925	27424	-	ENSG00000143815	LBR	protein_coding	chromosome	lamin B receptor [Source:HGNC Symbol;Acc:HGNC:6518]	ENSG00000143815.15	LBR	3930	1.36	5.91	114	5.96e-20	6.09e-19	19.2
8	25427847	25458476	30630	-	ENSG00000104756	KCTD9	protein_coding	chromosome	potassium channel tetramerization domain containing 9 [Source:HGNC Symbol;Acc:HGNC:22401]	ENSG00000104756.16	KCTD9	54793	-1.44	4.93	114	6.1e-20	6.22e-19	19.2
12	52232520	52252186	19667	+	ENSG00000135480	KRT7	protein_coding	chromosome	keratin 7 [Source:HGNC Symbol;Acc:HGNC:6445]	ENSG00000135480.16	KRT7	3855	4.2	3.45	114	6.19e-20	6.32e-19	19.2
19	32875925	32971991	96067	-	ENSG00000121289	CEP89	protein_coding	chromosome	centrosomal protein 89 [Source:HGNC Symbol;Acc:HGNC:25907]	ENSG00000121289.18	CEP89	84902	0.612	4.43	114	6.2e-20	6.32e-19	19.2
11	93661682	93730358	68677	+	ENSG00000166004	CEP295	protein_coding	chromosome	centrosomal protein 295 [Source:HGNC Symbol;Acc:HGNC:29366]	ENSG00000166004.15	CEP295	85459	0.952	3.49	114	6.23e-20	6.34e-19	19.2
2	26243170	26290465	47296	+	ENSG00000138029	HADHB	protein_coding	chromosome	hydroxyacyl-CoA dehydrogenase trifunctional multienzyme complex subunit beta [Source:HGNC Symbol;Acc:HGNC:4803]	ENSG00000138029.14	HADHB	3032	-0.896	6.55	114	6.32e-20	6.43e-19	19.2
17	82023305	82031151	7847	+	ENSG00000169683	LRRC45	protein_coding	chromosome	leucine rich repeat containing 45 [Source:HGNC Symbol;Acc:HGNC:28302]	ENSG00000169683.8	LRRC45	201255	1.11	5.24	114	6.33e-20	6.44e-19	19.2
3	121431427	121546641	115215	-	ENSG00000051341	POLQ	protein_coding	chromosome	DNA polymerase theta [Source:HGNC Symbol;Acc:HGNC:9186]	ENSG00000051341.14	POLQ	10721	1.75	3.01	113	6.57e-20	6.68e-19	19.2
1	63593411	63660245	66835	+	ENSG00000079739	PGM1	protein_coding	chromosome	phosphoglucomutase 1 [Source:HGNC Symbol;Acc:HGNC:8905]	ENSG00000079739.17	PGM1	5236	-1.1	6.02	113	6.57e-20	6.68e-19	19.2
16	66934444	66945096	10653	+	ENSG00000172831	CES2	protein_coding	chromosome	carboxylesterase 2 [Source:HGNC Symbol;Acc:HGNC:1864]	ENSG00000172831.13	CES2	8824	-1.88	9.07	113	6.67e-20	6.77e-19	19.2
9	92325953	92620529	294577	+	ENSG00000188312	CENPP	protein_coding	chromosome	centromere protein P [Source:HGNC Symbol;Acc:HGNC:32933]	ENSG00000188312.14	CENPP	401541	1.82	2.36	113	6.67e-20	6.77e-19	19.2
12	88033846	88050160	16315	+	ENSG00000133641	C12orf29	protein_coding	chromosome	chromosome 12 open reading frame 29 [Source:HGNC Symbol;Acc:HGNC:25322]	ENSG00000133641.18	C12orf29	91298	1.36	2.74	113	6.81e-20	6.9e-19	19.2
6	135181308	135219173	37866	+	ENSG00000118513	MYB	protein_coding	chromosome	MYB proto-oncogene, transcription factor [Source:HGNC Symbol;Acc:HGNC:7545]	ENSG00000118513.19	MYB	4602	1.65	5.25	113	6.82e-20	6.91e-19	19.2
10	62804720	62808479	3760	+	ENSG00000181915	ADO	protein_coding	chromosome	2-aminoethanethiol dioxygenase [Source:HGNC Symbol;Acc:HGNC:23506]	ENSG00000181915.5	ADO	84890	0.937	4.04	113	6.93e-20	7.02e-19	19.2
X	53094145	53170914	76770	+	ENSG00000232593	KANTR	protein_coding	chromosome	KDM5C adjacent transcript [Source:HGNC Symbol;Acc:HGNC:49510]	ENSG00000232593.7	KANTR	NA	0.922	3.54	113	6.93e-20	7.02e-19	19.2
4	56049073	56328625	279553	+	ENSG00000109265	KIAA1211	protein_coding	chromosome	KIAA1211 [Source:HGNC Symbol;Acc:HGNC:29219]	ENSG00000109265.14	KIAA1211	57482	-2.11	5.47	113	7.04e-20	7.12e-19	19.2
15	101270817	101277500	6684	-	ENSG00000131871	SELENOS	protein_coding	chromosome	selenoprotein S [Source:HGNC Symbol;Acc:HGNC:30396]	ENSG00000131871.15	SELENOS	55829	-0.912	6.15	113	7.2e-20	7.28e-19	19.1
2	200305881	200482264	176384	+	ENSG00000196141	SPATS2L	protein_coding	chromosome	spermatogenesis associated serine rich 2 like [Source:HGNC Symbol;Acc:HGNC:24574]	ENSG00000196141.14	SPATS2L	26010	-1.32	7.29	113	7.26e-20	7.34e-19	19.1
12	50979401	51028566	49166	-	ENSG00000110911	SLC11A2	protein_coding	chromosome	solute carrier family 11 member 2 [Source:HGNC Symbol;Acc:HGNC:10908]	ENSG00000110911.16	SLC11A2	4891	1.12	5.49	113	7.28e-20	7.35e-19	19.1
1	246945547	247008093	62547	-	ENSG00000197472	ZNF695	protein_coding	chromosome	zinc finger protein 695 [Source:HGNC Symbol;Acc:HGNC:30954]	ENSG00000197472.15	ZNF695	57116	2.82	0.293	113	7.29e-20	7.35e-19	19.1
10	13277796	13302412	24617	-	ENSG00000107537	PHYH	protein_coding	chromosome	phytanoyl-CoA 2-hydroxylase [Source:HGNC Symbol;Acc:HGNC:8940]	ENSG00000107537.14	PHYH	5264	-0.998	4.94	113	7.46e-20	7.53e-19	19.1
9	124857880	124861981	4102	-	ENSG00000136942	RPL35	protein_coding	chromosome	ribosomal protein L35 [Source:HGNC Symbol;Acc:HGNC:10344]	ENSG00000136942.15	RPL35	11224	1.13	8.76	113	7.6e-20	7.66e-19	19.1
2	121737103	121767853	30751	+	ENSG00000211460	TSN	protein_coding	chromosome	translin [Source:HGNC Symbol;Acc:HGNC:12379]	ENSG00000211460.12	TSN	7247	0.786	5.37	113	7.63e-20	7.69e-19	19.1
9	132944000	132991687	47688	+	ENSG00000165702	GFI1B	protein_coding	chromosome	growth factor independent 1B transcriptional repressor [Source:HGNC Symbol;Acc:HGNC:4238]	ENSG00000165702.14	GFI1B	8328	-1.81	0.873	113	7.82e-20	7.87e-19	19.1
1	153661788	153671028	9241	-	ENSG00000143621	ILF2	protein_coding	chromosome	interleukin enhancer binding factor 2 [Source:HGNC Symbol;Acc:HGNC:6037]	ENSG00000143621.17	ILF2	3608	0.721	6.43	113	7.83e-20	7.88e-19	19.1
5	138610967	138935034	324068	+	ENSG00000044115	CTNNA1	protein_coding	chromosome	catenin alpha 1 [Source:HGNC Symbol;Acc:HGNC:2509]	ENSG00000044115.21	CTNNA1	1495	-0.795	8.45	113	7.85e-20	7.9e-19	19.1
10	113679162	113730907	51746	+	ENSG00000165806	CASP7	protein_coding	chromosome	caspase 7 [Source:HGNC Symbol;Acc:HGNC:1508]	ENSG00000165806.20	CASP7	840	-1.58	6.75	113	8.1e-20	8.14e-19	19.1
16	74621399	74666877	45479	-	ENSG00000168411	RFWD3	protein_coding	chromosome	ring finger and WD repeat domain 3 [Source:HGNC Symbol;Acc:HGNC:25539]	ENSG00000168411.14	RFWD3	55159	0.905	4.73	113	8.18e-20	8.22e-19	19.1
8	80967810	81112068	144259	-	ENSG00000076641	PAG1	protein_coding	chromosome	phosphoprotein membrane anchor with glycosphingolipid microdomains 1 [Source:HGNC Symbol;Acc:HGNC:30043]	ENSG00000076641.4	PAG1	55824	-2.02	6.43	113	8.22e-20	8.26e-19	19.1
16	30085793	30091887	6095	-	ENSG00000149922	TBX6	protein_coding	chromosome	T-box transcription factor 6 [Source:HGNC Symbol;Acc:HGNC:11605]	ENSG00000149922.10	TBX6	6911	1.63	1.25	113	8.28e-20	8.3e-19	19.1
5	181236897	181248096	11200	-	ENSG00000204628	RACK1	protein_coding	chromosome	receptor for activated C kinase 1 [Source:HGNC Symbol;Acc:HGNC:4399]	ENSG00000204628.12	RACK1	10399	0.944	9.36	113	8.28e-20	8.3e-19	19.1
9	32886601	33025130	138530	-	ENSG00000137074	APTX	protein_coding	chromosome	aprataxin [Source:HGNC Symbol;Acc:HGNC:15984]	ENSG00000137074.19	APTX	54840	0.732	4.41	113	8.37e-20	8.38e-19	19.1
1	45326895	45328679	1785	+	ENSG00000186603	HPDL	protein_coding	chromosome	4-hydroxyphenylpyruvate dioxygenase like [Source:HGNC Symbol;Acc:HGNC:28242]	ENSG00000186603.6	HPDL	84842	2.24	3.74	113	8.37e-20	8.38e-19	19.1
1	54715861	54742657	26797	+	ENSG00000243725	TTC4	protein_coding	chromosome	tetratricopeptide repeat domain 4 [Source:HGNC Symbol;Acc:HGNC:12394]	ENSG00000243725.7	TTC4	7268	0.693	3.63	113	8.37e-20	8.38e-19	19.1
8	27809624	27838082	28459	-	ENSG00000168078	PBK	protein_coding	chromosome	PDZ binding kinase [Source:HGNC Symbol;Acc:HGNC:18282]	ENSG00000168078.10	PBK	55872	2.34	2.36	113	8.46e-20	8.46e-19	19.1
7	143390289	143408856	18568	-	ENSG00000146904	EPHA1	protein_coding	chromosome	EPH receptor A1 [Source:HGNC Symbol;Acc:HGNC:3385]	ENSG00000146904.9	EPHA1	2041	1.27	4.75	113	8.47e-20	8.47e-19	19.1
17	31860904	31901708	40805	-	ENSG00000108651	UTP6	protein_coding	chromosome	UTP6 small subunit processome component [Source:HGNC Symbol;Acc:HGNC:18279]	ENSG00000108651.10	UTP6	55813	0.947	4.86	112	8.65e-20	8.64e-19	19.1
6	3231403	3303373	71971	+	ENSG00000180822	PSMG4	protein_coding	chromosome	proteasome assembly chaperone 4 [Source:HGNC Symbol;Acc:HGNC:21108]	ENSG00000180822.11	PSMG4	389362	0.986	4.58	112	8.76e-20	8.74e-19	19.1
4	73986439	73988190	1752	-	ENSG00000163736	PPBP	protein_coding	chromosome	pro-platelet basic protein [Source:HGNC Symbol;Acc:HGNC:9240]	ENSG00000163736.4	PPBP	5473	7.23	6.3	112	8.77e-20	8.75e-19	19.1
5	173314713	173329503	14791	-	ENSG00000113739	STC2	protein_coding	chromosome	stanniocalcin 2 [Source:HGNC Symbol;Acc:HGNC:11374]	ENSG00000113739.10	STC2	8614	3.54	3.63	112	8.84e-20	8.81e-19	19.1
3	114005833	114088422	82590	+	ENSG00000151576	QTRT2	protein_coding	chromosome	queuine tRNA-ribosyltransferase accessory subunit 2 [Source:HGNC Symbol;Acc:HGNC:25771]	ENSG00000151576.10	QTRT2	79691	0.672	4.31	112	8.88e-20	8.85e-19	19.1
16	3539033	3577403	38371	-	ENSG00000167984	NLRC3	protein_coding	chromosome	NLR family CARD domain containing 3 [Source:HGNC Symbol;Acc:HGNC:29889]	ENSG00000167984.18	NLRC3	197358	-1.24	3.12	112	9.06e-20	9.03e-19	19
CHR_HSCHR6_MHC_DBB_CTG1	30678308	30681681	3374	-	ENSG00000236843	NRM	protein_coding	chromosome	nurim [Source:HGNC Symbol;Acc:HGNC:8003]	ENSG00000236843.8	NRM	11270	1.34	3.06	112	9.19e-20	9.15e-19	19
22	40769630	40819399	49770	-	ENSG00000100372	SLC25A17	protein_coding	chromosome	solute carrier family 25 member 17 [Source:HGNC Symbol;Acc:HGNC:10987]	ENSG00000100372.15	SLC25A17	10478	0.817	3.29	112	9.31e-20	9.26e-19	19
7	51016212	51316818	300607	-	ENSG00000106078	COBL	protein_coding	chromosome	cordon-bleu WH2 repeat protein [Source:HGNC Symbol;Acc:HGNC:22199]	ENSG00000106078.19	COBL	23242	-1.33	6.08	112	9.31e-20	9.26e-19	19
9	105558130	105641118	82989	+	ENSG00000106692	FKTN	protein_coding	chromosome	fukutin [Source:HGNC Symbol;Acc:HGNC:3622]	ENSG00000106692.14	FKTN	2218	1.08	3.46	112	9.35e-20	9.29e-19	19
X	74582976	74614624	31649	-	ENSG00000131263	RLIM	protein_coding	chromosome	ring finger protein, LIM domain interacting [Source:HGNC Symbol;Acc:HGNC:13429]	ENSG00000131263.13	RLIM	51132	0.889	4.69	112	9.5e-20	9.43e-19	19
16	67028984	67101058	72075	+	ENSG00000067955	CBFB	protein_coding	chromosome	core-binding factor subunit beta [Source:HGNC Symbol;Acc:HGNC:1539]	ENSG00000067955.15	CBFB	865	0.747	4.66	112	9.69e-20	9.62e-19	19
8	30774457	30814314	39858	-	ENSG00000104695	PPP2CB	protein_coding	chromosome	protein phosphatase 2 catalytic subunit beta [Source:HGNC Symbol;Acc:HGNC:9300]	ENSG00000104695.13	PPP2CB	5516	-1.24	6.19	112	9.83e-20	9.75e-19	19
22	17137511	17165287	27777	-	ENSG00000069998	HDHD5	protein_coding	chromosome	haloacid dehalogenase like hydrolase domain containing 5 [Source:HGNC Symbol;Acc:HGNC:1843]	ENSG00000069998.12	HDHD5	27440	1.05	5.05	112	9.85e-20	9.76e-19	19
8	144078648	144080648	2001	+	ENSG00000178896	EXOSC4	protein_coding	chromosome	exosome component 4 [Source:HGNC Symbol;Acc:HGNC:18189]	ENSG00000178896.9	EXOSC4	54512	1.06	4.76	112	9.94e-20	9.84e-19	19
17	44319625	44324870	5246	-	ENSG00000013306	SLC25A39	protein_coding	chromosome	solute carrier family 25 member 39 [Source:HGNC Symbol;Acc:HGNC:24279]	ENSG00000013306.16	SLC25A39	51629	0.944	7.34	112	9.97e-20	9.87e-19	19
17	47896150	47928957	32808	+	ENSG00000167182	SP2	protein_coding	chromosome	Sp2 transcription factor [Source:HGNC Symbol;Acc:HGNC:11207]	ENSG00000167182.15	SP2	6668	-0.839	5.05	112	1e-19	9.91e-19	19
19	17226213	17229219	3007	+	ENSG00000099330	OCEL1	protein_coding	chromosome	occludin/ELL domain containing 1 [Source:HGNC Symbol;Acc:HGNC:26221]	ENSG00000099330.9	OCEL1	79629	-1.23	4.78	112	1.01e-19	9.95e-19	19
7	156668946	156893216	224271	-	ENSG00000105983	LMBR1	protein_coding	chromosome	limb development membrane protein 1 [Source:HGNC Symbol;Acc:HGNC:13243]	ENSG00000105983.22	LMBR1	64327	1.04	4.52	112	1.02e-19	1.01e-18	19
11	62559596	62574086	14491	-	ENSG00000254772	EEF1G	protein_coding	chromosome	eukaryotic translation elongation factor 1 gamma [Source:HGNC Symbol;Acc:HGNC:3213]	ENSG00000254772.10	EEF1G	1937	0.922	10.2	112	1.03e-19	1.02e-18	19
12	32399529	32646050	246522	+	ENSG00000139132	FGD4	protein_coding	chromosome	FYVE, RhoGEF and PH domain containing 4 [Source:HGNC Symbol;Acc:HGNC:19125]	ENSG00000139132.14	FGD4	121512	-1.17	5.07	112	1.04e-19	1.02e-18	19
15	66702236	66782849	80614	+	ENSG00000137834	SMAD6	protein_coding	chromosome	SMAD family member 6 [Source:HGNC Symbol;Acc:HGNC:6772]	ENSG00000137834.15	SMAD6	4091	1.46	4.6	112	1.05e-19	1.03e-18	19
3	183697797	183812624	114828	+	ENSG00000163872	YEATS2	protein_coding	chromosome	YEATS domain containing 2 [Source:HGNC Symbol;Acc:HGNC:25489]	ENSG00000163872.16	YEATS2	55689	0.824	5.03	112	1.05e-19	1.04e-18	19
8	22165140	22212326	47187	+	ENSG00000168487	BMP1	protein_coding	chromosome	bone morphogenetic protein 1 [Source:HGNC Symbol;Acc:HGNC:1067]	ENSG00000168487.19	BMP1	649	-1.16	6.35	112	1.08e-19	1.06e-18	19
3	38138478	38143022	4545	+	ENSG00000172936	MYD88	protein_coding	chromosome	MYD88 innate immune signal transduction adaptor [Source:HGNC Symbol;Acc:HGNC:7562]	ENSG00000172936.14	MYD88	4615	-1.03	6.56	112	1.08e-19	1.07e-18	19
1	214603195	214664571	61377	+	ENSG00000117724	CENPF	protein_coding	chromosome	centromere protein F [Source:HGNC Symbol;Acc:HGNC:1857]	ENSG00000117724.13	CENPF	1063	2.44	5.01	112	1.09e-19	1.07e-18	19
19	55262223	55280381	18159	-	ENSG00000133265	HSPBP1	protein_coding	chromosome	HSPA (Hsp70) binding protein 1 [Source:HGNC Symbol;Acc:HGNC:24989]	ENSG00000133265.11	HSPBP1	23640	1.11	5.58	112	1.09e-19	1.07e-18	19
14	49643555	49688422	44868	-	ENSG00000100479	POLE2	protein_coding	chromosome	DNA polymerase epsilon 2, accessory subunit [Source:HGNC Symbol;Acc:HGNC:9178]	ENSG00000100479.13	POLE2	5427	1.63	1.61	112	1.1e-19	1.08e-18	19
9	131576770	131740074	163305	-	ENSG00000107263	RAPGEF1	protein_coding	chromosome	Rap guanine nucleotide exchange factor 1 [Source:HGNC Symbol;Acc:HGNC:4568]	ENSG00000107263.18	RAPGEF1	2889	-0.64	6.61	112	1.1e-19	1.08e-18	19
1	86704570	86748184	43615	+	ENSG00000097033	SH3GLB1	protein_coding	chromosome	SH3 domain containing GRB2 like, endophilin B1 [Source:HGNC Symbol;Acc:HGNC:10833]	ENSG00000097033.14	SH3GLB1	51100	-0.846	6.34	112	1.11e-19	1.09e-18	19
20	54208087	54228052	19966	+	ENSG00000101132	PFDN4	protein_coding	chromosome	prefoldin subunit 4 [Source:HGNC Symbol;Acc:HGNC:8868]	ENSG00000101132.10	PFDN4	5203	1.4	3.13	112	1.11e-19	1.09e-18	19
22	43132209	43143398	11190	-	ENSG00000100294	MCAT	protein_coding	chromosome	malonyl-CoA-acyl carrier protein transacylase [Source:HGNC Symbol;Acc:HGNC:29622]	ENSG00000100294.13	MCAT	27349	0.884	4.06	112	1.12e-19	1.1e-18	18.9
7	128476729	128506602	29874	+	ENSG00000165055	METTL2B	protein_coding	chromosome	methyltransferase like 2B [Source:HGNC Symbol;Acc:HGNC:18272]	ENSG00000165055.15	METTL2B	55798	0.698	4.75	112	1.12e-19	1.09e-18	19
18	2655738	2805017	149280	+	ENSG00000101596	SMCHD1	protein_coding	chromosome	structural maintenance of chromosomes flexible hinge domain containing 1 [Source:HGNC Symbol;Acc:HGNC:29090]	ENSG00000101596.15	SMCHD1	23347	-1.3	5.71	112	1.13e-19	1.11e-18	18.9
15	51829628	51947295	117668	+	ENSG00000138594	TMOD3	protein_coding	chromosome	tropomodulin 3 [Source:HGNC Symbol;Acc:HGNC:11873]	ENSG00000138594.14	TMOD3	29766	-0.863	5.75	111	1.17e-19	1.15e-18	18.9
7	23298739	23311729	12991	+	ENSG00000156928	MALSU1	protein_coding	chromosome	mitochondrial assembly of ribosomal large subunit 1 [Source:HGNC Symbol;Acc:HGNC:21721]	ENSG00000156928.5	MALSU1	115416	0.942	3.73	111	1.18e-19	1.15e-18	18.9
5	10249929	10266389	16461	+	ENSG00000150753	CCT5	protein_coding	chromosome	chaperonin containing TCP1 subunit 5 [Source:HGNC Symbol;Acc:HGNC:1618]	ENSG00000150753.12	CCT5	22948	0.889	7.01	111	1.2e-19	1.17e-18	18.9
11	65044818	65058553	13736	-	ENSG00000168060	NAALADL1	protein_coding	chromosome	N-acetylated alpha-linked acidic dipeptidase like 1 [Source:HGNC Symbol;Acc:HGNC:23536]	ENSG00000168060.16	NAALADL1	10004	-2.81	5.31	111	1.2e-19	1.17e-18	18.9
17	78787381	78841441	54061	-	ENSG00000055483	USP36	protein_coding	chromosome	ubiquitin specific peptidase 36 [Source:HGNC Symbol;Acc:HGNC:20062]	ENSG00000055483.19	USP36	57602	1.2	5.75	111	1.22e-19	1.19e-18	18.9
22	17592136	17628749	36614	-	ENSG00000131100	ATP6V1E1	protein_coding	chromosome	ATPase H+ transporting V1 subunit E1 [Source:HGNC Symbol;Acc:HGNC:857]	ENSG00000131100.13	ATP6V1E1	529	-0.609	6.14	111	1.22e-19	1.19e-18	18.9
20	34560542	34698790	138249	-	ENSG00000101464	PIGU	protein_coding	chromosome	phosphatidylinositol glycan anchor biosynthesis class U [Source:HGNC Symbol;Acc:HGNC:15791]	ENSG00000101464.10	PIGU	128869	1.01	4.64	111	1.23e-19	1.2e-18	18.9
1	235447190	235504452	57263	-	ENSG00000162885	B3GALNT2	protein_coding	chromosome	beta-1,3-N-acetylgalactosaminyltransferase 2 [Source:HGNC Symbol;Acc:HGNC:28596]	ENSG00000162885.13	B3GALNT2	148789	0.852	4.22	111	1.23e-19	1.2e-18	18.9
12	112405190	112418838	13649	-	ENSG00000089009	RPL6	protein_coding	chromosome	ribosomal protein L6 [Source:HGNC Symbol;Acc:HGNC:10362]	ENSG00000089009.15	RPL6	6128	1.03	9.17	111	1.24e-19	1.21e-18	18.9
16	29820394	29848039	27646	+	ENSG00000013364	MVP	protein_coding	chromosome	major vault protein [Source:HGNC Symbol;Acc:HGNC:7531]	ENSG00000013364.19	MVP	9961	-1.15	9.15	111	1.25e-19	1.22e-18	18.9
5	60596912	60700190	103279	-	ENSG00000035499	DEPDC1B	protein_coding	chromosome	DEP domain containing 1B [Source:HGNC Symbol;Acc:HGNC:24902]	ENSG00000035499.13	DEPDC1B	55789	1.74	2.39	111	1.27e-19	1.23e-18	18.9
19	34428352	34471251	42900	+	ENSG00000126261	UBA2	protein_coding	chromosome	ubiquitin like modifier activating enzyme 2 [Source:HGNC Symbol;Acc:HGNC:30661]	ENSG00000126261.13	UBA2	10054	1.22	5.45	111	1.27e-19	1.23e-18	18.9
1	1324756	1328896	4141	+	ENSG00000224051	CPTP	protein_coding	chromosome	ceramide-1-phosphate transfer protein [Source:HGNC Symbol;Acc:HGNC:28116]	ENSG00000224051.7	CPTP	80772	-1.15	6.03	111	1.28e-19	1.24e-18	18.9
11	2444684	2848991	404308	+	ENSG00000053918	KCNQ1	protein_coding	chromosome	potassium voltage-gated channel subfamily Q member 1 [Source:HGNC Symbol;Acc:HGNC:6294]	ENSG00000053918.17	KCNQ1	3784	1.7	6.02	111	1.32e-19	1.28e-18	18.9
17	744421	753999	9579	-	ENSG00000179409	GEMIN4	protein_coding	chromosome	gem nuclear organelle associated protein 4 [Source:HGNC Symbol;Acc:HGNC:15717]	ENSG00000179409.11	GEMIN4	50628	1.4	4.05	111	1.33e-19	1.29e-18	18.9
X	43654907	43746824	91918	+	ENSG00000189221	MAOA	protein_coding	chromosome	monoamine oxidase A [Source:HGNC Symbol;Acc:HGNC:6833]	ENSG00000189221.9	MAOA	4128	-1.67	7.37	111	1.33e-19	1.29e-18	18.9
12	132822187	132956304	134118	-	ENSG00000072609	CHFR	protein_coding	chromosome	checkpoint with forkhead and ring finger domains [Source:HGNC Symbol;Acc:HGNC:20455]	ENSG00000072609.17	CHFR	55743	-1.36	5.63	111	1.34e-19	1.3e-18	18.9
18	48919853	48952052	32200	-	ENSG00000101665	SMAD7	protein_coding	chromosome	SMAD family member 7 [Source:HGNC Symbol;Acc:HGNC:6773]	ENSG00000101665.9	SMAD7	4092	-1.29	5.88	111	1.35e-19	1.3e-18	18.9
16	3443649	3486953	43305	+	ENSG00000122390	NAA60	protein_coding	chromosome	N(alpha)-acetyltransferase 60, NatF catalytic subunit [Source:HGNC Symbol;Acc:HGNC:25875]	ENSG00000122390.19	NAA60	79903	-0.814	6.69	111	1.35e-19	1.3e-18	18.9
19	7688758	7702146	13389	-	ENSG00000104921	FCER2	protein_coding	chromosome	Fc fragment of IgE receptor II [Source:HGNC Symbol;Acc:HGNC:3612]	ENSG00000104921.15	FCER2	2208	-3.04	1.24	111	1.37e-19	1.33e-18	18.9
3	133928145	134052184	124040	-	ENSG00000174640	SLCO2A1	protein_coding	chromosome	solute carrier organic anion transporter family member 2A1 [Source:HGNC Symbol;Acc:HGNC:10955]	ENSG00000174640.14	SLCO2A1	6578	-2.23	6.35	111	1.37e-19	1.32e-18	18.9
19	40924219	40950660	26442	+	ENSG00000256612	CYP2B7P	transcribed_unprocessed_pseudogene	chromosome	cytochrome P450 family 2 subfamily B member 7, pseudogene [Source:HGNC Symbol;Acc:HGNC:2616]	ENSG00000256612.7	CYP2B7P	NA	-2.63	2.1	111	1.38e-19	1.33e-18	18.9
19	984271	998438	14168	+	ENSG00000065268	WDR18	protein_coding	chromosome	WD repeat domain 18 [Source:HGNC Symbol;Acc:HGNC:17956]	ENSG00000065268.10	WDR18	57418	1.31	5.21	111	1.4e-19	1.35e-18	18.9
9	76385526	76394517	8992	-	ENSG00000135002	RFK	protein_coding	chromosome	riboflavin kinase [Source:HGNC Symbol;Acc:HGNC:30324]	ENSG00000135002.12	RFK	55312	-1.34	5.48	111	1.42e-19	1.37e-18	18.8
3	8750408	8769628	19221	-	ENSG00000180914	OXTR	protein_coding	chromosome	oxytocin receptor [Source:HGNC Symbol;Acc:HGNC:8529]	ENSG00000180914.10	OXTR	5021	2.45	0.545	111	1.42e-19	1.37e-18	18.8
5	78485215	78770021	284807	-	ENSG00000145685	LHFPL2	protein_coding	chromosome	LHFPL tetraspan subfamily member 2 [Source:HGNC Symbol;Acc:HGNC:6588]	ENSG00000145685.14	LHFPL2	10184	-1.14	5.66	111	1.43e-19	1.38e-18	18.8
11	113314529	113383544	69016	+	ENSG00000149292	TTC12	protein_coding	chromosome	tetratricopeptide repeat domain 12 [Source:HGNC Symbol;Acc:HGNC:23700]	ENSG00000149292.16	TTC12	54970	1	3.45	111	1.43e-19	1.38e-18	18.8
5	135027734	135034813	7080	-	ENSG00000069011	PITX1	protein_coding	chromosome	paired like homeodomain 1 [Source:HGNC Symbol;Acc:HGNC:9004]	ENSG00000069011.16	PITX1	5307	1.68	5.36	111	1.45e-19	1.4e-18	18.8
2	101002229	101024032	21804	+	ENSG00000071082	RPL31	protein_coding	chromosome	ribosomal protein L31 [Source:HGNC Symbol;Acc:HGNC:10334]	ENSG00000071082.11	RPL31	6160	0.97	8.66	111	1.45e-19	1.4e-18	18.8
7	5970925	6009106	38182	-	ENSG00000122512	PMS2	protein_coding	chromosome	PMS1 homolog 2, mismatch repair system component [Source:HGNC Symbol;Acc:HGNC:9122]	ENSG00000122512.16	PMS2	5395	0.607	4.25	111	1.45e-19	1.39e-18	18.8
17	75845699	75856507	10809	-	ENSG00000132471	WBP2	protein_coding	chromosome	WW domain binding protein 2 [Source:HGNC Symbol;Acc:HGNC:12738]	ENSG00000132471.12	WBP2	23558	-0.767	6.9	111	1.46e-19	1.4e-18	18.8
1	45786987	46036122	249136	+	ENSG00000086015	MAST2	protein_coding	chromosome	microtubule associated serine/threonine kinase 2 [Source:HGNC Symbol;Acc:HGNC:19035]	ENSG00000086015.21	MAST2	23139	-1.39	7.91	111	1.47e-19	1.41e-18	18.8
20	35455164	35519280	64117	+	ENSG00000126001	CEP250	protein_coding	chromosome	centrosomal protein 250 [Source:HGNC Symbol;Acc:HGNC:1859]	ENSG00000126001.16	CEP250	11190	1.07	5.6	111	1.47e-19	1.41e-18	18.8
X	154379197	154381523	2327	+	ENSG00000102119	EMD	protein_coding	chromosome	emerin [Source:HGNC Symbol;Acc:HGNC:3331]	ENSG00000102119.10	EMD	2010	1.08	5.48	111	1.48e-19	1.42e-18	18.8
3	122411846	122416062	4217	-	ENSG00000196981	WDR5B	protein_coding	chromosome	WD repeat domain 5B [Source:HGNC Symbol;Acc:HGNC:17826]	ENSG00000196981.4	WDR5B	54554	0.997	2.41	111	1.48e-19	1.42e-18	18.8
14	23630115	23645639	15525	+	ENSG00000100867	DHRS2	protein_coding	chromosome	dehydrogenase/reductase 2 [Source:HGNC Symbol;Acc:HGNC:18349]	ENSG00000100867.14	DHRS2	10202	5.61	3.98	111	1.49e-19	1.43e-18	18.8
12	104802553	104958744	156192	-	ENSG00000136052	SLC41A2	protein_coding	chromosome	solute carrier family 41 member 2 [Source:HGNC Symbol;Acc:HGNC:31045]	ENSG00000136052.9	SLC41A2	84102	-1.64	4.43	111	1.49e-19	1.43e-18	18.8
13	20728731	20773961	45231	-	ENSG00000150456	EEF1AKMT1	protein_coding	chromosome	EEF1A lysine methyltransferase 1 [Source:HGNC Symbol;Acc:HGNC:27351]	ENSG00000150456.11	EEF1AKMT1	221143	1.51	1.49	111	1.49e-19	1.43e-18	18.8
4	88592434	88708541	116108	+	ENSG00000138641	HERC3	protein_coding	chromosome	HECT and RLD domain containing E3 ubiquitin protein ligase 3 [Source:HGNC Symbol;Acc:HGNC:4876]	ENSG00000138641.18	HERC3	8916	-1.26	4.33	110	1.56e-19	1.5e-18	18.8
20	63547891	63556695	8805	+	ENSG00000125531	FNDC11	protein_coding	chromosome	fibronectin type III domain containing 11 [Source:HGNC Symbol;Acc:HGNC:28764]	ENSG00000125531.7	FNDC11	79025	2.25	0.178	110	1.59e-19	1.52e-18	18.8
10	126905409	127452517	547109	+	ENSG00000150760	DOCK1	protein_coding	chromosome	dedicator of cytokinesis 1 [Source:HGNC Symbol;Acc:HGNC:2987]	ENSG00000150760.12	DOCK1	1793	-0.942	6.25	110	1.59e-19	1.52e-18	18.8
14	21098937	21103724	4788	+	ENSG00000232070	TMEM253	protein_coding	chromosome	transmembrane protein 253 [Source:HGNC Symbol;Acc:HGNC:32545]	ENSG00000232070.8	TMEM253	643382	-2.26	4.39	110	1.59e-19	1.52e-18	18.8
9	84275457	84340758	65302	-	ENSG00000197506	SLC28A3	protein_coding	chromosome	solute carrier family 28 member 3 [Source:HGNC Symbol;Acc:HGNC:16484]	ENSG00000197506.8	SLC28A3	64078	3.1	2.6	110	1.6e-19	1.53e-18	18.8
1	226989865	227318474	328610	-	ENSG00000143776	CDC42BPA	protein_coding	chromosome	CDC42 binding protein kinase alpha [Source:HGNC Symbol;Acc:HGNC:1737]	ENSG00000143776.18	CDC42BPA	8476	-0.781	5.79	110	1.62e-19	1.55e-18	18.8
16	90004865	90020128	15264	-	ENSG00000003249	DBNDD1	protein_coding	chromosome	dysbindin domain containing 1 [Source:HGNC Symbol;Acc:HGNC:28455]	ENSG00000003249.13	DBNDD1	79007	1.87	3.44	110	1.65e-19	1.57e-18	18.8
9	136494433	136546048	51616	-	ENSG00000148400	NOTCH1	protein_coding	chromosome	notch receptor 1 [Source:HGNC Symbol;Acc:HGNC:7881]	ENSG00000148400.12	NOTCH1	4851	1.28	6.68	110	1.65e-19	1.58e-18	18.8
2	120217479	120223400	5922	-	ENSG00000226479	TMEM185B	protein_coding	chromosome	transmembrane protein 185B [Source:HGNC Symbol;Acc:HGNC:18896]	ENSG00000226479.4	TMEM185B	79134	1	4.8	110	1.68e-19	1.6e-18	18.8
2	218274197	218292586	18390	-	ENSG00000135926	TMBIM1	protein_coding	chromosome	transmembrane BAX inhibitor motif containing 1 [Source:HGNC Symbol;Acc:HGNC:23410]	ENSG00000135926.15	TMBIM1	64114	-1.22	8.34	110	1.7e-19	1.62e-18	18.8
X	150980509	150990771	10263	+	ENSG00000029993	HMGB3	protein_coding	chromosome	high mobility group box 3 [Source:HGNC Symbol;Acc:HGNC:5004]	ENSG00000029993.15	HMGB3	3149	1.65	5.01	110	1.71e-19	1.62e-18	18.8
5	146447311	146511961	64651	+	ENSG00000113649	TCERG1	protein_coding	chromosome	transcription elongation regulator 1 [Source:HGNC Symbol;Acc:HGNC:15630]	ENSG00000113649.11	TCERG1	10915	0.925	5.44	110	1.72e-19	1.63e-18	18.8
12	56158161	56163496	5336	+	ENSG00000092841	MYL6	protein_coding	chromosome	myosin light chain 6 [Source:HGNC Symbol;Acc:HGNC:7587]	ENSG00000092841.18	MYL6	4637	-0.973	9.57	110	1.75e-19	1.66e-18	18.8
16	24919389	25015666	96278	-	ENSG00000140750	ARHGAP17	protein_coding	chromosome	Rho GTPase activating protein 17 [Source:HGNC Symbol;Acc:HGNC:18239]	ENSG00000140750.17	ARHGAP17	55114	-1.02	6.44	110	1.75e-19	1.66e-18	18.8
19	37907208	38208369	301162	+	ENSG00000105738	SIPA1L3	protein_coding	chromosome	signal induced proliferation associated 1 like 3 [Source:HGNC Symbol;Acc:HGNC:23801]	ENSG00000105738.11	SIPA1L3	23094	-1.45	6.97	110	1.76e-19	1.67e-18	18.8
11	13276652	13387266	110615	+	ENSG00000133794	ARNTL	protein_coding	chromosome	aryl hydrocarbon receptor nuclear translocator like [Source:HGNC Symbol;Acc:HGNC:701]	ENSG00000133794.17	ARNTL	406	-1.11	3.5	110	1.78e-19	1.69e-18	18.8
19	48615328	48619184	3857	-	ENSG00000063177	RPL18	protein_coding	chromosome	ribosomal protein L18 [Source:HGNC Symbol;Acc:HGNC:10310]	ENSG00000063177.13	RPL18	6141	1.06	9.39	110	1.8e-19	1.7e-18	18.7
11	76381303	76414619	33317	+	ENSG00000179240	GVQW3	protein_coding	chromosome	GVQW motif containing 3 [Source:HGNC Symbol;Acc:HGNC:51239]	ENSG00000179240.11	GVQW3	100506127	0.904	3.76	110	1.81e-19	1.72e-18	18.7
18	70289045	70330199	41155	+	ENSG00000170677	SOCS6	protein_coding	chromosome	suppressor of cytokine signaling 6 [Source:HGNC Symbol;Acc:HGNC:16833]	ENSG00000170677.6	SOCS6	9306	-1.35	5.24	110	1.83e-19	1.73e-18	18.7
16	30378106	30400108	22003	+	ENSG00000180035	ZNF48	protein_coding	chromosome	zinc finger protein 48 [Source:HGNC Symbol;Acc:HGNC:13114]	ENSG00000180035.12	ZNF48	197407	1.1	3.47	110	1.83e-19	1.73e-18	18.7
22	37807905	37817176	9272	+	ENSG00000100116	GCAT	protein_coding	chromosome	glycine C-acetyltransferase [Source:HGNC Symbol;Acc:HGNC:4188]	ENSG00000100116.16	GCAT	23464	1.34	3.49	110	1.87e-19	1.77e-18	18.7
7	56011051	56051604	40554	-	ENSG00000146733	PSPH	protein_coding	chromosome	phosphoserine phosphatase [Source:HGNC Symbol;Acc:HGNC:9577]	ENSG00000146733.14	PSPH	5723	1.31	3.74	110	1.89e-19	1.78e-18	18.7
16	31138926	31150083	11158	-	ENSG00000178226	PRSS36	protein_coding	chromosome	serine protease 36 [Source:HGNC Symbol;Acc:HGNC:26906]	ENSG00000178226.11	PRSS36	146547	-1.62	2.56	110	1.91e-19	1.8e-18	18.7
18	63476958	63505085	28128	+	ENSG00000206075	SERPINB5	protein_coding	chromosome	serpin family B member 5 [Source:HGNC Symbol;Acc:HGNC:8949]	ENSG00000206075.14	SERPINB5	5268	2.66	4.45	110	1.92e-19	1.82e-18	18.7
20	13389392	13638932	249541	-	ENSG00000089123	TASP1	protein_coding	chromosome	taspase 1 [Source:HGNC Symbol;Acc:HGNC:15859]	ENSG00000089123.16	TASP1	55617	1.08	2.95	110	1.93e-19	1.82e-18	18.7
12	49127782	49131397	3616	-	ENSG00000123416	TUBA1B	protein_coding	chromosome	tubulin alpha 1b [Source:HGNC Symbol;Acc:HGNC:18809]	ENSG00000123416.15	TUBA1B	10376	0.877	9.25	110	1.93e-19	1.82e-18	18.7
2	96816245	96835382	19138	+	ENSG00000168763	CNNM3	protein_coding	chromosome	cyclin and CBS domain divalent metal cation transport mediator 3 [Source:HGNC Symbol;Acc:HGNC:104]	ENSG00000168763.16	CNNM3	26505	0.669	5.24	110	1.96e-19	1.85e-18	18.7
2	238158970	238168900	9931	+	ENSG00000178752	ERFE	protein_coding	chromosome	erythroferrone [Source:HGNC Symbol;Acc:HGNC:26727]	ENSG00000178752.16	ERFE	151176	2.76	0.742	110	1.99e-19	1.87e-18	18.7
9	121567057	121785530	218474	+	ENSG00000136848	DAB2IP	protein_coding	chromosome	DAB2 interacting protein [Source:HGNC Symbol;Acc:HGNC:17294]	ENSG00000136848.17	DAB2IP	153090	-0.857	7.36	109	2.02e-19	1.91e-18	18.7
10	110919547	111013667	94121	+	ENSG00000108061	SHOC2	protein_coding	chromosome	SHOC2 leucine rich repeat scaffold protein [Source:HGNC Symbol;Acc:HGNC:15454]	ENSG00000108061.11	SHOC2	8036	-0.927	4.93	109	2.04e-19	1.92e-18	18.7
20	38926312	38953106	26795	+	ENSG00000101447	FAM83D	protein_coding	chromosome	family with sequence similarity 83 member D [Source:HGNC Symbol;Acc:HGNC:16122]	ENSG00000101447.15	FAM83D	81610	2.34	3.84	109	2.06e-19	1.94e-18	18.7
X	54530211	54567289	37079	+	ENSG00000130119	GNL3L	protein_coding	chromosome	G protein nucleolar 3 like [Source:HGNC Symbol;Acc:HGNC:25553]	ENSG00000130119.16	GNL3L	54552	0.715	4.92	109	2.1e-19	1.97e-18	18.7
17	28855010	28861061	6052	+	ENSG00000132591	ERAL1	protein_coding	chromosome	Era like 12S mitochondrial rRNA chaperone 1 [Source:HGNC Symbol;Acc:HGNC:3424]	ENSG00000132591.12	ERAL1	26284	0.688	5.09	109	2.1e-19	1.97e-18	18.7
1	32221928	32231604	9677	+	ENSG00000084623	EIF3I	protein_coding	chromosome	eukaryotic translation initiation factor 3 subunit I [Source:HGNC Symbol;Acc:HGNC:3272]	ENSG00000084623.11	EIF3I	8668	0.837	6.79	109	2.13e-19	2e-18	18.7
12	56712428	56731628	19201	-	ENSG00000196531	NACA	protein_coding	chromosome	nascent polypeptide associated complex subunit alpha [Source:HGNC Symbol;Acc:HGNC:7629]	ENSG00000196531.11	NACA	4666	0.819	8.23	109	2.15e-19	2.02e-18	18.7
5	149993118	150000654	7537	-	ENSG00000164296	TIGD6	protein_coding	chromosome	tigger transposable element derived 6 [Source:HGNC Symbol;Acc:HGNC:18332]	ENSG00000164296.7	TIGD6	81789	-1.46	3.09	109	2.21e-19	2.07e-18	18.7
1	35599541	35641526	41986	-	ENSG00000126067	PSMB2	protein_coding	chromosome	proteasome subunit beta 2 [Source:HGNC Symbol;Acc:HGNC:9539]	ENSG00000126067.12	PSMB2	5690	0.677	5.97	109	2.26e-19	2.12e-18	18.6
1	246540561	246566261	25701	-	ENSG00000162851	TFB2M	protein_coding	chromosome	transcription factor B2, mitochondrial [Source:HGNC Symbol;Acc:HGNC:18559]	ENSG00000162851.8	TFB2M	64216	1.11	3.28	109	2.27e-19	2.12e-18	18.6
1	178006136	178037950	31815	-	ENSG00000242193	CRYZL2P	transcribed_unitary_pseudogene	chromosome	crystallin zeta like 2, pseudogene [Source:HGNC Symbol;Acc:HGNC:52164]	ENSG00000242193.11	CRYZL2P	NA	1.57	5.48	109	2.29e-19	2.15e-18	18.6
18	3247481	3256236	8756	+	ENSG00000101608	MYL12A	protein_coding	chromosome	myosin light chain 12A [Source:HGNC Symbol;Acc:HGNC:16701]	ENSG00000101608.12	MYL12A	10627	-1.03	7.89	109	2.3e-19	2.16e-18	18.6
4	148078762	148444698	365937	-	ENSG00000151623	NR3C2	protein_coding	chromosome	nuclear receptor subfamily 3 group C member 2 [Source:HGNC Symbol;Acc:HGNC:7979]	ENSG00000151623.15	NR3C2	4306	-2.14	5.98	109	2.33e-19	2.18e-18	18.6
2	231781671	231809254	27584	+	ENSG00000144524	COPS7B	protein_coding	chromosome	COP9 signalosome subunit 7B [Source:HGNC Symbol;Acc:HGNC:16760]	ENSG00000144524.17	COPS7B	64708	0.599	4.98	109	2.34e-19	2.18e-18	18.6
15	74954416	74957464	3049	-	ENSG00000178718	RPP25	protein_coding	chromosome	ribonuclease P and MRP subunit p25 [Source:HGNC Symbol;Acc:HGNC:30361]	ENSG00000178718.6	RPP25	54913	1.13	5.13	109	2.35e-19	2.2e-18	18.6
16	23755026	23758935	3910	+	ENSG00000166869	CHP2	protein_coding	chromosome	calcineurin like EF-hand protein 2 [Source:HGNC Symbol;Acc:HGNC:24927]	ENSG00000166869.3	CHP2	63928	-2.65	7.05	109	2.42e-19	2.26e-18	18.6
X	71095851	71103532	7682	+	ENSG00000184481	FOXO4	protein_coding	chromosome	forkhead box O4 [Source:HGNC Symbol;Acc:HGNC:7139]	ENSG00000184481.17	FOXO4	4303	-1.12	5.04	109	2.44e-19	2.28e-18	18.6
8	94371960	94475115	103156	-	ENSG00000197275	RAD54B	protein_coding	chromosome	RAD54 homolog B [Source:HGNC Symbol;Acc:HGNC:17228]	ENSG00000197275.14	RAD54B	25788	2.75	1.65	109	2.46e-19	2.3e-18	18.6
22	46330875	46357340	26466	+	ENSG00000100416	TRMU	protein_coding	chromosome	tRNA 5-methylaminomethyl-2-thiouridylate methyltransferase [Source:HGNC Symbol;Acc:HGNC:25481]	ENSG00000100416.15	TRMU	55687	0.777	5.4	109	2.5e-19	2.33e-18	18.6
12	38646822	38907430	260609	-	ENSG00000139117	CPNE8	protein_coding	chromosome	copine 8 [Source:HGNC Symbol;Acc:HGNC:23498]	ENSG00000139117.14	CPNE8	144402	-2.21	3.77	109	2.52e-19	2.35e-18	18.6
15	40358219	40378621	20403	+	ENSG00000140323	DISP2	protein_coding	chromosome	dispatched RND transporter family member 2 [Source:HGNC Symbol;Acc:HGNC:19712]	ENSG00000140323.6	DISP2	85455	-2.45	4.7	109	2.52e-19	2.35e-18	18.6
4	39498755	39528311	29557	-	ENSG00000109814	UGDH	protein_coding	chromosome	UDP-glucose 6-dehydrogenase [Source:HGNC Symbol;Acc:HGNC:12525]	ENSG00000109814.12	UGDH	7358	-1.34	6.02	109	2.53e-19	2.36e-18	18.6
X	129803288	129843909	40622	-	ENSG00000188706	ZDHHC9	protein_coding	chromosome	zinc finger DHHC-type containing 9 [Source:HGNC Symbol;Acc:HGNC:18475]	ENSG00000188706.13	ZDHHC9	51114	1.19	5.98	109	2.53e-19	2.35e-18	18.6
1	150218417	150236156	17740	-	ENSG00000143401	ANP32E	protein_coding	chromosome	acidic nuclear phosphoprotein 32 family member E [Source:HGNC Symbol;Acc:HGNC:16673]	ENSG00000143401.15	ANP32E	81611	1.1	4.11	109	2.56e-19	2.38e-18	18.6
12	47841537	47943048	101512	-	ENSG00000111424	VDR	protein_coding	chromosome	vitamin D receptor [Source:HGNC Symbol;Acc:HGNC:12679]	ENSG00000111424.11	VDR	7421	-1.57	7.27	109	2.62e-19	2.43e-18	18.6
3	158645822	158672648	26827	-	ENSG00000079257	LXN	protein_coding	chromosome	latexin [Source:HGNC Symbol;Acc:HGNC:13347]	ENSG00000079257.8	LXN	56925	-1.37	3.96	109	2.64e-19	2.45e-18	18.6
9	135808487	135907546	99060	-	ENSG00000130559	CAMSAP1	protein_coding	chromosome	calmodulin regulated spectrin associated protein 1 [Source:HGNC Symbol;Acc:HGNC:19946]	ENSG00000130559.19	CAMSAP1	157922	0.962	4.38	109	2.67e-19	2.48e-18	18.6
12	15882387	15903478	21092	+	ENSG00000023734	STRAP	protein_coding	chromosome	serine/threonine kinase receptor associated protein [Source:HGNC Symbol;Acc:HGNC:30796]	ENSG00000023734.11	STRAP	11171	1.06	5.87	109	2.68e-19	2.48e-18	18.6
16	67164681	67169945	5265	+	ENSG00000102878	HSF4	protein_coding	chromosome	heat shock transcription factor 4 [Source:HGNC Symbol;Acc:HGNC:5227]	ENSG00000102878.16	HSF4	3299	1.67	5.36	108	2.69e-19	2.49e-18	18.6
16	67430652	67437553	6902	+	ENSG00000176387	HSD11B2	protein_coding	chromosome	hydroxysteroid 11-beta dehydrogenase 2 [Source:HGNC Symbol;Acc:HGNC:5209]	ENSG00000176387.7	HSD11B2	3291	-1.88	8.64	108	2.69e-19	2.49e-18	18.6
18	31058840	31102522	43683	-	ENSG00000134755	DSC2	protein_coding	chromosome	desmocollin 2 [Source:HGNC Symbol;Acc:HGNC:3036]	ENSG00000134755.17	DSC2	1824	-1.86	7.25	108	2.73e-19	2.53e-18	18.6
17	75318076	75405709	87634	-	ENSG00000177885	GRB2	protein_coding	chromosome	growth factor receptor bound protein 2 [Source:HGNC Symbol;Acc:HGNC:4566]	ENSG00000177885.15	GRB2	2885	-0.464	6.95	108	2.73e-19	2.53e-18	18.6
11	66268590	66277492	8903	+	ENSG00000174903	RAB1B	protein_coding	chromosome	RAB1B, member RAS oncogene family [Source:HGNC Symbol;Acc:HGNC:18370]	ENSG00000174903.16	RAB1B	81876	-0.64	7.83	108	2.77e-19	2.56e-18	18.6
15	22867052	22981063	114012	-	ENSG00000273749	CYFIP1	protein_coding	chromosome	cytoplasmic FMR1 interacting protein 1 [Source:HGNC Symbol;Acc:HGNC:13759]	ENSG00000273749.5	CYFIP1	23191	-0.821	6.94	108	2.78e-19	2.57e-18	18.6
12	53441678	53446645	4968	+	ENSG00000205352	PRR13	protein_coding	chromosome	proline rich 13 [Source:HGNC Symbol;Acc:HGNC:24528]	ENSG00000205352.11	PRR13	54458	-1.1	8.05	108	2.84e-19	2.62e-18	18.5
3	43690108	43734371	44264	+	ENSG00000011198	ABHD5	protein_coding	chromosome	abhydrolase domain containing 5 [Source:HGNC Symbol;Acc:HGNC:21396]	ENSG00000011198.10	ABHD5	51099	-1.23	4.31	108	2.85e-19	2.63e-18	18.5
1	228100726	228105411	4686	-	ENSG00000143793	C1orf35	protein_coding	chromosome	chromosome 1 open reading frame 35 [Source:HGNC Symbol;Acc:HGNC:19032]	ENSG00000143793.13	C1orf35	79169	0.992	4.76	108	2.86e-19	2.64e-18	18.5
1	3857267	3885429	28163	+	ENSG00000169598	DFFB	protein_coding	chromosome	DNA fragmentation factor subunit beta [Source:HGNC Symbol;Acc:HGNC:2773]	ENSG00000169598.15	DFFB	1677	0.906	3.21	108	2.86e-19	2.64e-18	18.5
12	70638073	70920738	282666	-	ENSG00000153233	PTPRR	protein_coding	chromosome	protein tyrosine phosphatase receptor type R [Source:HGNC Symbol;Acc:HGNC:9680]	ENSG00000153233.13	PTPRR	5801	-2.46	4.48	108	2.87e-19	2.64e-18	18.5
5	132294394	132344190	49797	+	ENSG00000197208	SLC22A4	protein_coding	chromosome	solute carrier family 22 member 4 [Source:HGNC Symbol;Acc:HGNC:10968]	ENSG00000197208.6	SLC22A4	6583	-1.96	2.81	108	2.89e-19	2.66e-18	18.5
14	99971449	100144236	172788	+	ENSG00000196405	EVL	protein_coding	chromosome	Enah/Vasp-like [Source:HGNC Symbol;Acc:HGNC:20234]	ENSG00000196405.13	EVL	51466	-1.32	5.44	108	2.93e-19	2.69e-18	18.5
5	131245493	131398447	152955	+	ENSG00000158985	CDC42SE2	protein_coding	chromosome	CDC42 small effector 2 [Source:HGNC Symbol;Acc:HGNC:18547]	ENSG00000158985.13	CDC42SE2	56990	-1.13	6.16	108	2.94e-19	2.71e-18	18.5
2	202874782	203014798	140017	-	ENSG00000138442	WDR12	protein_coding	chromosome	WD repeat domain 12 [Source:HGNC Symbol;Acc:HGNC:14098]	ENSG00000138442.9	WDR12	55759	2.13	4.16	108	2.97e-19	2.73e-18	18.5
11	13009316	13012119	2804	+	ENSG00000189431	RASSF10	protein_coding	chromosome	Ras association domain family member 10 [Source:HGNC Symbol;Acc:HGNC:33984]	ENSG00000189431.8	RASSF10	644943	2.58	2.47	108	2.99e-19	2.74e-18	18.5
3	125929275	125937039	7765	-	ENSG00000189366	ALG1L	protein_coding	chromosome	ALG1 chitobiosyldiphosphodolichol beta-mannosyltransferase like [Source:HGNC Symbol;Acc:HGNC:33721]	ENSG00000189366.9	ALG1L	200810	2.66	0.595	108	3e-19	2.75e-18	18.5
16	3263800	3301401	37602	+	ENSG00000006194	ZNF263	protein_coding	chromosome	zinc finger protein 263 [Source:HGNC Symbol;Acc:HGNC:13056]	ENSG00000006194.10	ZNF263	10127	0.761	4.86	108	3.03e-19	2.78e-18	18.5
19	6467207	6482557	15351	-	ENSG00000205744	DENND1C	protein_coding	chromosome	DENN domain containing 1C [Source:HGNC Symbol;Acc:HGNC:26225]	ENSG00000205744.10	DENND1C	79958	-1.25	5.17	108	3.14e-19	2.88e-18	18.5
15	65117379	65133808	16430	-	ENSG00000090470	PDCD7	protein_coding	chromosome	programmed cell death 7 [Source:HGNC Symbol;Acc:HGNC:8767]	ENSG00000090470.15	PDCD7	10081	0.846	4.29	108	3.16e-19	2.9e-18	18.5
19	10602457	10644557	42101	+	ENSG00000129353	SLC44A2	protein_coding	chromosome	solute carrier family 44 member 2 [Source:HGNC Symbol;Acc:HGNC:17292]	ENSG00000129353.15	SLC44A2	57153	-0.747	7.15	108	3.19e-19	2.92e-18	18.5
10	74151202	74709963	558762	+	ENSG00000156110	ADK	protein_coding	chromosome	adenosine kinase [Source:HGNC Symbol;Acc:HGNC:257]	ENSG00000156110.14	ADK	132	1.13	3.71	108	3.25e-19	2.97e-18	18.5
21	32733899	32771792	37894	-	ENSG00000159086	PAXBP1	protein_coding	chromosome	PAX3 and PAX7 binding protein 1 [Source:HGNC Symbol;Acc:HGNC:13579]	ENSG00000159086.15	PAXBP1	94104	0.965	4.96	108	3.28e-19	3e-18	18.5
22	19036282	19122454	86173	-	ENSG00000070413	DGCR2	protein_coding	chromosome	DiGeorge syndrome critical region gene 2 [Source:HGNC Symbol;Acc:HGNC:2845]	ENSG00000070413.20	DGCR2	9993	-0.791	7.06	108	3.29e-19	3.01e-18	18.5
9	35099776	35103195	3420	-	ENSG00000165283	STOML2	protein_coding	chromosome	stomatin like 2 [Source:HGNC Symbol;Acc:HGNC:14559]	ENSG00000165283.16	STOML2	30968	0.797	6.38	108	3.34e-19	3.05e-18	18.5
3	50611520	50649291	37772	+	ENSG00000114738	MAPKAPK3	protein_coding	chromosome	MAPK activated protein kinase 3 [Source:HGNC Symbol;Acc:HGNC:6888]	ENSG00000114738.11	MAPKAPK3	7867	0.916	5.05	108	3.41e-19	3.11e-18	18.5
1	11980181	12013514	33334	+	ENSG00000116688	MFN2	protein_coding	chromosome	mitofusin 2 [Source:HGNC Symbol;Acc:HGNC:16877]	ENSG00000116688.16	MFN2	9927	-0.643	6.75	108	3.44e-19	3.14e-18	18.5
8	6499651	6563409	63759	-	ENSG00000091879	ANGPT2	protein_coding	chromosome	angiopoietin 2 [Source:HGNC Symbol;Acc:HGNC:485]	ENSG00000091879.13	ANGPT2	285	2.09	1.95	108	3.49e-19	3.18e-18	18.5
3	184346185	184361650	15466	-	ENSG00000114859	CLCN2	protein_coding	chromosome	chloride voltage-gated channel 2 [Source:HGNC Symbol;Acc:HGNC:2020]	ENSG00000114859.16	CLCN2	1181	-1.74	6.98	108	3.49e-19	3.18e-18	18.5
7	44748581	44769881	21301	+	ENSG00000122515	ZMIZ2	protein_coding	chromosome	zinc finger MIZ-type containing 2 [Source:HGNC Symbol;Acc:HGNC:22229]	ENSG00000122515.15	ZMIZ2	83637	0.862	7.6	108	3.49e-19	3.18e-18	18.5
2	232547970	232550557	2588	-	ENSG00000221944	TIGD1	protein_coding	chromosome	tigger transposable element derived 1 [Source:HGNC Symbol;Acc:HGNC:14523]	ENSG00000221944.8	TIGD1	200765	1	2.93	107	3.61e-19	3.29e-18	18.4
3	39406716	39412542	5827	+	ENSG00000168028	RPSA	protein_coding	chromosome	ribosomal protein SA [Source:HGNC Symbol;Acc:HGNC:6502]	ENSG00000168028.14	RPSA	3921	1.02	9.42	107	3.64e-19	3.31e-18	18.4
10	97446170	97457370	11201	+	ENSG00000171307	ZDHHC16	protein_coding	chromosome	zinc finger DHHC-type containing 16 [Source:HGNC Symbol;Acc:HGNC:20714]	ENSG00000171307.19	ZDHHC16	84287	0.599	4.52	107	3.69e-19	3.35e-18	18.4
21	36750888	36990236	239349	-	ENSG00000159267	HLCS	protein_coding	chromosome	holocarboxylase synthetase [Source:HGNC Symbol;Acc:HGNC:4976]	ENSG00000159267.14	HLCS	3141	0.934	3.76	107	3.7e-19	3.36e-18	18.4
16	3012923	3014505	1583	+	ENSG00000213937	CLDN9	protein_coding	chromosome	claudin 9 [Source:HGNC Symbol;Acc:HGNC:2051]	ENSG00000213937.4	CLDN9	9080	2.42	0.775	107	3.7e-19	3.36e-18	18.4
17	50761029	50767557	6529	-	ENSG00000167117	ANKRD40CL	protein_coding	chromosome	ANKRD40 C-terminal like [Source:HGNC Symbol;Acc:HGNC:26080]	ENSG00000167117.9	ANKRD40CL	55018	-1.92	4.97	107	3.74e-19	3.39e-18	18.4
4	10074339	10116949	42611	-	ENSG00000071127	WDR1	protein_coding	chromosome	WD repeat domain 1 [Source:HGNC Symbol;Acc:HGNC:12754]	ENSG00000071127.17	WDR1	9948	-0.808	8.69	107	3.79e-19	3.45e-18	18.4
19	7958573	8005659	47087	-	ENSG00000066044	ELAVL1	protein_coding	chromosome	ELAV like RNA binding protein 1 [Source:HGNC Symbol;Acc:HGNC:3312]	ENSG00000066044.15	ELAVL1	1994	0.507	5.61	107	3.81e-19	3.46e-18	18.4
5	151771045	151812785	41741	+	ENSG00000145907	G3BP1	protein_coding	chromosome	G3BP stress granule assembly factor 1 [Source:HGNC Symbol;Acc:HGNC:30292]	ENSG00000145907.15	G3BP1	10146	1.08	6.17	107	3.82e-19	3.47e-18	18.4
13	110641412	110713603	72192	-	ENSG00000134905	CARS2	protein_coding	chromosome	cysteinyl-tRNA synthetase 2, mitochondrial [Source:HGNC Symbol;Acc:HGNC:25695]	ENSG00000134905.17	CARS2	79587	1.03	5.85	107	3.83e-19	3.48e-18	18.4
14	55124110	55145423	21314	+	ENSG00000131981	LGALS3	protein_coding	chromosome	galectin 3 [Source:HGNC Symbol;Acc:HGNC:6563]	ENSG00000131981.16	LGALS3	3958	-1.35	10.1	107	3.89e-19	3.52e-18	18.4
1	111414319	111427735	13417	-	ENSG00000085465	OVGP1	protein_coding	chromosome	oviductal glycoprotein 1 [Source:HGNC Symbol;Acc:HGNC:8524]	ENSG00000085465.13	OVGP1	5016	1.57	1.92	107	3.93e-19	3.56e-18	18.4
15	62066977	62070917	3941	+	ENSG00000198535	C2CD4A	protein_coding	chromosome	C2 calcium dependent domain containing 4A [Source:HGNC Symbol;Acc:HGNC:33627]	ENSG00000198535.5	C2CD4A	145741	3.06	3.33	107	3.93e-19	3.56e-18	18.4
1	145992435	145996579	4145	-	ENSG00000265972	TXNIP	protein_coding	chromosome	thioredoxin interacting protein [Source:HGNC Symbol;Acc:HGNC:16952]	ENSG00000265972.6	TXNIP	10628	-1.5	9.34	107	4e-19	3.61e-18	18.4
2	218658764	218663443	4680	+	ENSG00000074582	BCS1L	protein_coding	chromosome	BCS1 homolog, ubiquinol-cytochrome c reductase complex chaperone [Source:HGNC Symbol;Acc:HGNC:1020]	ENSG00000074582.14	BCS1L	617	1.03	4.67	107	4.04e-19	3.65e-18	18.4
12	48935723	48957487	21765	-	ENSG00000134287	ARF3	protein_coding	chromosome	ADP ribosylation factor 3 [Source:HGNC Symbol;Acc:HGNC:654]	ENSG00000134287.10	ARF3	377	-0.779	7.58	107	4.04e-19	3.65e-18	18.4
21	33642400	33899861	257462	+	ENSG00000205726	ITSN1	protein_coding	chromosome	intersectin 1 [Source:HGNC Symbol;Acc:HGNC:6183]	ENSG00000205726.15	ITSN1	6453	-1.05	5.37	107	4.09e-19	3.69e-18	18.4
7	141927357	141947007	19651	-	ENSG00000258227	CLEC5A	protein_coding	chromosome	C-type lectin domain containing 5A [Source:HGNC Symbol;Acc:HGNC:2054]	ENSG00000258227.7	CLEC5A	23601	3.26	0.853	107	4.14e-19	3.74e-18	18.4
14	67294371	67360265	65895	-	ENSG00000100554	ATP6V1D	protein_coding	chromosome	ATPase H+ transporting V1 subunit D [Source:HGNC Symbol;Acc:HGNC:13527]	ENSG00000100554.12	ATP6V1D	51382	-1.01	5.44	107	4.22e-19	3.81e-18	18.4
2	65310851	65432637	121787	-	ENSG00000198369	SPRED2	protein_coding	chromosome	sprouty related EVH1 domain containing 2 [Source:HGNC Symbol;Acc:HGNC:17722]	ENSG00000198369.10	SPRED2	200734	-1.05	5.69	107	4.23e-19	3.81e-18	18.4
2	28849821	28870309	20489	-	ENSG00000171103	TRMT61B	protein_coding	chromosome	tRNA methyltransferase 61B [Source:HGNC Symbol;Acc:HGNC:26070]	ENSG00000171103.11	TRMT61B	55006	1.27	2.68	107	4.24e-19	3.82e-18	18.4
19	19033575	19060311	26737	+	ENSG00000105676	ARMC6	protein_coding	chromosome	armadillo repeat containing 6 [Source:HGNC Symbol;Acc:HGNC:25049]	ENSG00000105676.14	ARMC6	93436	0.818	4.92	107	4.29e-19	3.86e-18	18.4
9	120388869	120580170	191302	-	ENSG00000136861	CDK5RAP2	protein_coding	chromosome	CDK5 regulatory subunit associated protein 2 [Source:HGNC Symbol;Acc:HGNC:18672]	ENSG00000136861.18	CDK5RAP2	55755	0.735	4.92	107	4.29e-19	3.86e-18	18.4
6	169457212	169702067	244856	-	ENSG00000184465	WDR27	protein_coding	chromosome	WD repeat domain 27 [Source:HGNC Symbol;Acc:HGNC:21248]	ENSG00000184465.16	WDR27	253769	0.859	4.83	107	4.34e-19	3.9e-18	18.4
1	37492575	37514774	22200	-	ENSG00000163875	MEAF6	protein_coding	chromosome	MYST/Esa1 associated factor 6 [Source:HGNC Symbol;Acc:HGNC:25674]	ENSG00000163875.15	MEAF6	64769	0.713	4.58	107	4.35e-19	3.91e-18	18.4
6	42929192	42939294	10103	+	ENSG00000137161	CNPY3	protein_coding	chromosome	canopy FGF signaling regulator 3 [Source:HGNC Symbol;Acc:HGNC:11968]	ENSG00000137161.17	CNPY3	10695	0.889	5.42	107	4.38e-19	3.94e-18	18.4
12	124911604	124917368	5765	-	ENSG00000150991	UBC	protein_coding	chromosome	ubiquitin C [Source:HGNC Symbol;Acc:HGNC:12468]	ENSG00000150991.15	UBC	7316	-0.785	10.7	107	4.39e-19	3.94e-18	18.4
11	61299451	61342596	43146	-	ENSG00000167986	DDB1	protein_coding	chromosome	damage specific DNA binding protein 1 [Source:HGNC Symbol;Acc:HGNC:2717]	ENSG00000167986.13	DDB1	1642	0.519	7.11	107	4.47e-19	4.01e-18	18.4
8	138130023	138497261	367239	-	ENSG00000147724	FAM135B	protein_coding	chromosome	family with sequence similarity 135 member B [Source:HGNC Symbol;Acc:HGNC:28029]	ENSG00000147724.12	FAM135B	51059	-2.45	0.318	107	4.48e-19	4.02e-18	18.3
16	88809339	88811937	2599	-	ENSG00000198931	APRT	protein_coding	chromosome	adenine phosphoribosyltransferase [Source:HGNC Symbol;Acc:HGNC:626]	ENSG00000198931.11	APRT	353	1.07	6.15	107	4.56e-19	4.09e-18	18.3
13	27424619	27435823	11205	+	ENSG00000122034	GTF3A	protein_coding	chromosome	general transcription factor IIIA [Source:HGNC Symbol;Acc:HGNC:4662]	ENSG00000122034.15	GTF3A	2971	1.58	6.15	107	4.59e-19	4.11e-18	18.3
19	4292232	4302431	10200	-	ENSG00000167664	TMIGD2	protein_coding	chromosome	transmembrane and immunoglobulin domain containing 2 [Source:HGNC Symbol;Acc:HGNC:28324]	ENSG00000167664.8	TMIGD2	126259	-1.81	1.53	107	4.7e-19	4.21e-18	18.3
2	43886224	43995989	109766	-	ENSG00000138095	LRPPRC	protein_coding	chromosome	leucine rich pentatricopeptide repeat containing [Source:HGNC Symbol;Acc:HGNC:15714]	ENSG00000138095.19	LRPPRC	10128	1.39	6.65	107	4.71e-19	4.21e-18	18.3
14	19268853	19337730	68878	-	ENSG00000244306	DUXAP10	transcribed_processed_pseudogene	chromosome	double homeobox A pseudogene 10 [Source:NCBI gene;Acc:503639]	ENSG00000244306.11	DUXAP10	503639	3.44	4.94	107	4.71e-19	4.22e-18	18.3
2	197705369	197708395	3027	+	ENSG00000247626	MARS2	protein_coding	chromosome	methionyl-tRNA synthetase 2, mitochondrial [Source:HGNC Symbol;Acc:HGNC:25133]	ENSG00000247626.5	MARS2	92935	1.54	3.38	107	4.77e-19	4.26e-18	18.3
10	45972489	46003742	31254	+	ENSG00000265354	TIMM23	protein_coding	chromosome	translocase of inner mitochondrial membrane 23 [Source:HGNC Symbol;Acc:HGNC:17312]	ENSG00000265354.4	TIMM23	100287932	0.753	4.89	106	4.99e-19	4.46e-18	18.3
12	95473520	95515839	42320	+	ENSG00000111142	METAP2	protein_coding	chromosome	methionyl aminopeptidase 2 [Source:HGNC Symbol;Acc:HGNC:16672]	ENSG00000111142.14	METAP2	10988	0.753	5.25	106	5e-19	4.47e-18	18.3
1	100989623	101026088	36466	-	ENSG00000117543	DPH5	protein_coding	chromosome	diphthamide biosynthesis 5 [Source:HGNC Symbol;Acc:HGNC:24270]	ENSG00000117543.21	DPH5	51611	1.19	3	106	5.01e-19	4.48e-18	18.3
10	73812501	73874591	62091	-	ENSG00000148660	CAMK2G	protein_coding	chromosome	calcium/calmodulin dependent protein kinase II gamma [Source:HGNC Symbol;Acc:HGNC:1463]	ENSG00000148660.20	CAMK2G	818	-0.884	6.31	106	5.03e-19	4.49e-18	18.3
11	108116695	108147603	30909	+	ENSG00000075239	ACAT1	protein_coding	chromosome	acetyl-CoA acetyltransferase 1 [Source:HGNC Symbol;Acc:HGNC:93]	ENSG00000075239.14	ACAT1	38	-1.08	5.54	106	5.04e-19	4.49e-18	18.3
11	125569280	125584684	15405	+	ENSG00000149547	EI24	protein_coding	chromosome	EI24 autophagy associated transmembrane protein [Source:HGNC Symbol;Acc:HGNC:13276]	ENSG00000149547.15	EI24	9538	0.832	6.26	106	5.1e-19	4.55e-18	18.3
12	107685799	107713162	27364	+	ENSG00000136045	PWP1	protein_coding	chromosome	PWP1 homolog, endonuclein [Source:HGNC Symbol;Acc:HGNC:17015]	ENSG00000136045.12	PWP1	11137	0.864	4.45	106	5.13e-19	4.57e-18	18.3
3	44737661	44761619	23959	-	ENSG00000163807	KIAA1143	protein_coding	chromosome	KIAA1143 [Source:HGNC Symbol;Acc:HGNC:29198]	ENSG00000163807.6	KIAA1143	57456	0.707	4.18	106	5.14e-19	4.58e-18	18.3
14	60245752	60299087	53336	+	ENSG00000100614	PPM1A	protein_coding	chromosome	protein phosphatase, Mg2+/Mn2+ dependent 1A [Source:HGNC Symbol;Acc:HGNC:9275]	ENSG00000100614.18	PPM1A	5494	-1.29	6.02	106	5.2e-19	4.63e-18	18.3
20	46684365	46689444	5080	-	ENSG00000172315	TP53RK	protein_coding	chromosome	TP53 regulating kinase [Source:HGNC Symbol;Acc:HGNC:16197]	ENSG00000172315.6	TP53RK	112858	1.13	4.07	106	5.2e-19	4.63e-18	18.3
19	48485271	48513935	28665	-	ENSG00000142235	LMTK3	protein_coding	chromosome	lemur tyrosine kinase 3 [Source:HGNC Symbol;Acc:HGNC:19295]	ENSG00000142235.10	LMTK3	114783	2.35	3.55	106	5.26e-19	4.67e-18	18.3
1	11736084	11754802	18719	+	ENSG00000177674	AGTRAP	protein_coding	chromosome	angiotensin II receptor associated protein [Source:HGNC Symbol;Acc:HGNC:13539]	ENSG00000177674.16	AGTRAP	57085	1.15	4.34	106	5.37e-19	4.77e-18	18.3
3	11790442	11846919	56478	-	ENSG00000144559	TAMM41	protein_coding	chromosome	TAM41 mitochondrial translocator assembly and maintenance homolog [Source:HGNC Symbol;Acc:HGNC:25187]	ENSG00000144559.10	TAMM41	132001	1.21	2.32	106	5.41e-19	4.8e-18	18.3
1	45343883	45491163	147281	-	ENSG00000070759	TESK2	protein_coding	chromosome	testis associated actin remodelling kinase 2 [Source:HGNC Symbol;Acc:HGNC:11732]	ENSG00000070759.17	TESK2	10420	-1.71	4.2	106	5.45e-19	4.83e-18	18.3
12	116910950	117031148	120199	+	ENSG00000174989	FBXW8	protein_coding	chromosome	F-box and WD repeat domain containing 8 [Source:HGNC Symbol;Acc:HGNC:13597]	ENSG00000174989.13	FBXW8	26259	0.969	3.6	106	5.54e-19	4.92e-18	18.3
16	29811382	29815892	4511	+	ENSG00000167371	PRRT2	protein_coding	chromosome	proline rich transmembrane protein 2 [Source:HGNC Symbol;Acc:HGNC:30500]	ENSG00000167371.21	PRRT2	112476	-1.82	5.19	106	5.58e-19	4.95e-18	18.3
14	73958010	74019399	61390	-	ENSG00000187097	ENTPD5	protein_coding	chromosome	ectonucleoside triphosphate diphosphohydrolase 5 (inactive) [Source:HGNC Symbol;Acc:HGNC:3367]	ENSG00000187097.12	ENTPD5	957	-1.92	7.23	106	5.7e-19	5.05e-18	18.2
16	56635739	56637086	1348	+	ENSG00000255986	MT1JP	transcribed_unprocessed_pseudogene	chromosome	metallothionein 1J, pseudogene [Source:HGNC Symbol;Acc:HGNC:7402]	ENSG00000255986.6	MT1JP	NA	-3.25	2.59	106	5.7e-19	5.05e-18	18.2
12	6310436	6328506	18071	+	ENSG00000008323	PLEKHG6	protein_coding	chromosome	pleckstrin homology and RhoGEF domain containing G6 [Source:HGNC Symbol;Acc:HGNC:25562]	ENSG00000008323.15	PLEKHG6	55200	-1.56	7.22	106	5.71e-19	5.05e-18	18.2
3	43354859	43691594	336736	-	ENSG00000160746	ANO10	protein_coding	chromosome	anoctamin 10 [Source:HGNC Symbol;Acc:HGNC:25519]	ENSG00000160746.13	ANO10	55129	-0.878	5.26	106	5.78e-19	5.11e-18	18.2
2	196833004	196927796	94793	-	ENSG00000197121	PGAP1	protein_coding	chromosome	post-GPI attachment to proteins 1 [Source:HGNC Symbol;Acc:HGNC:25712]	ENSG00000197121.15	PGAP1	80055	1.74	3.48	106	5.8e-19	5.13e-18	18.2
2	206159585	206162928	3344	+	ENSG00000114942	EEF1B2	protein_coding	chromosome	eukaryotic translation elongation factor 1 beta 2 [Source:HGNC Symbol;Acc:HGNC:3208]	ENSG00000114942.14	EEF1B2	1933	0.91	7.75	106	5.85e-19	5.17e-18	18.2
12	6491886	6493841	1956	-	ENSG00000111639	MRPL51	protein_coding	chromosome	mitochondrial ribosomal protein L51 [Source:HGNC Symbol;Acc:HGNC:14044]	ENSG00000111639.8	MRPL51	51258	0.676	5.67	106	5.87e-19	5.18e-18	18.2
8	73939169	73972287	33119	-	ENSG00000154582	ELOC	protein_coding	chromosome	elongin C [Source:HGNC Symbol;Acc:HGNC:11617]	ENSG00000154582.16	ELOC	6921	0.919	4.59	106	5.96e-19	5.26e-18	18.2
9	33104082	33167356	63275	-	ENSG00000086062	B4GALT1	protein_coding	chromosome	beta-1,4-galactosyltransferase 1 [Source:HGNC Symbol;Acc:HGNC:924]	ENSG00000086062.12	B4GALT1	2683	-1.17	7.11	106	6.11e-19	5.39e-18	18.2
10	45727200	45792961	65762	+	ENSG00000172661	WASHC2C	protein_coding	chromosome	WASH complex subunit 2C [Source:HGNC Symbol;Acc:HGNC:23414]	ENSG00000172661.18	WASHC2C	253725	-1.12	6.32	106	6.12e-19	5.39e-18	18.2
[truncated: 14,525 more rows]
