# Supplementary material for: Pathway2Targets: an open-source pathway-based approach to repurpose therapeutic drugs and prioritize human targets
Source: PeerJ. 2023 Sep 29;11:e16088. doi: 10.7717/peerj.16088 (PMC10544355; doi:10.7717/peerj.16088)
Supplement: Supplemental Information 3 [file peerj-11-16088-s003.xlsx]

## Sheet: Sheet1
Name	# Proteins in Pathway	# DEGs in Pathway	Bonferroni-adjusted p-value	Pathway Status	Source Database
Major pathway of rRNA processing in the nucleolus and cytosol	169	162	7.19266e-13	Activated	Reactome
rRNA processing in the nucleus and cytosol	178	169	3.55199e-12	Activated	Reactome
rRNA processing	183	173	6.45105e-12	Activated	Reactome
Gene Expression	1598	1307	3.44642e-08	Activated	Reactome
Eukaryotic Translation Elongation	90	86	7.11062e-08	Activated	Reactome
Peptide chain elongation	86	82	1.64458e-07	Activated	Reactome
Processing of Capped Intron-Containing Pre-mRNA	228	202	2.60691e-07	Activated	Reactome
Translation	152	137	1.00778e-06	Activated	Reactome
Non-coding RNA Metabolism	49	48	1.85759e-06	Activated	Reactome
snRNP Assembly	49	48	1.85759e-06	Activated	Reactome
Transport of Mature Transcript to Cytoplasm	74	70	1.91913e-06	Activated	Reactome
mRNA Splicing	183	162	2.23498e-06	Activated	Reactome
pre-mRNA splicing	175	155	2.99032e-06	Activated	Reactome
Nonsense-Mediated Decay (NMD)	113	102	8.92466e-06	Activated	Reactome
Nonsense Mediated Decay (NMD) enhanced by the Exon Junction Complex (EJC)	113	102	8.92466e-06	Activated	Reactome
PLK1 signaling events	44	40	8.8824e-05	Activated	NCI
Transcriptional Regulation by TP53	344	286	0.000112756	Activated	Reactome
Transport of Mature mRNAs Derived from Intronless Transcripts	36	34	0.000192364	Activated	Reactome
DNA Repair	282	235	0.000194173	Activated	Reactome
Transport of Mature mRNA Derived from an Intronless Transcript	35	33	0.0002346	Activated	Reactome
SUMOylation of DNA replication proteins	41	38	0.000278242	Activated	Reactome
SUMOylation of RNA binding proteins	41	38	0.000278242	Activated	Reactome
Regulation of TP53 Activity	151	128	0.000405792	Activated	Reactome
Activation of the pre-replicative complex	31	29	0.000511282	Activated	Reactome
Transport of the SLBP Dependant Mature mRNA	31	29	0.000511282	Activated	Reactome
HDR through Homologous Recombination (HRR)	66	58	0.000647897	Activated	Reactome
Mitotic G1-G1/S phases	139	117	0.00078824	Activated	Reactome
TCR signaling in na√Øve CD4+ T cells	59	48	0.0012836	Inhibited	NCI
Positive epigenetic regulation of rRNA expression	76	65	0.0014284	Activated	Reactome
TCR signaling in na√Øve CD8+ T cells	47	38	0.00158279	Inhibited	NCI
HIF-1 signaling pathway	94	75	0.00168935	Inhibited	KEGG
Anchoring of the basal body to the plasma membrane	94	79	0.00189529	Activated	Reactome
S Phase	124	103	0.00192303	Activated	Reactome
ISG15 antiviral mechanism	68	58	0.00193918	Activated	Reactome
Resolution of Sister Chromatid Cohesion	97	88	0.0023193	Activated	Reactome
Telomere Maintenance	61	52	0.00236287	Activated	Reactome
G1/S Transition	116	96	0.00247959	Activated	Reactome
Cyclin A/B1 associated events during G2/M transition	21	19	0.00312362	Activated	Reactome
DNA Replication	103	85	0.00321461	Activated	Reactome
G2/M Checkpoints	150	122	0.00351894	Activated	Reactome
SUMO E3 ligases SUMOylate target proteins	92	76	0.00355148	Activated	Reactome
Cell Cycle Checkpoints	181	146	0.00401309	Activated	Reactome
SUMOylation of DNA damage response and repair proteins	70	58	0.0043663	Activated	Reactome
DNA Replication Pre-Initiation	82	67	0.00536786	Activated	Reactome
M/G1 Transition	82	67	0.00536786	Activated	Reactome
Eukaryotic Translation Termination	90	86	0.00565885	Activated	Reactome
SUMOylation	98	79	0.00656602	Activated	Reactome
Assembly of the primary cilium	176	140	0.00670949	Activated	Reactome
G2/M DNA damage checkpoint	79	63	0.00908209	Activated	Reactome
Mitotic Prometaphase	105	95	0.0125106	Activated	Reactome
Interferon Signaling	132	102	0.0136718	Activated	Reactome
Cytokine Signaling in Immune system	492	378	0.0148615	Activated	Reactome
Cap-dependent Translation Initiation	117	109	0.0164764	Activated	Reactome
APC-Cdc20 mediated degradation of Nek2A	25	19	0.0167907	Activated	Reactome
Eukaryotic Translation Initiation	117	109	0.0168162	Activated	Reactome
APC/C:Cdc20 mediated degradation of mitotic proteins	72	54	0.0182523	Activated	Reactome
APC:Cdc20 mediated degradation of cell cycle proteins prior to satisfation of the cell cycle checkpoint	70	52	0.0192838	Activated	Reactome
APC/C:Cdh1 mediated degradation of Cdc20 and other APC/C:Cdh1 targeted proteins in late mitosis/early G1	70	51	0.021075	Activated	Reactome
Chromosome Maintenance	88	78	0.0221745	Activated	Reactome
Activation of ATR in response to replication stress	36	34	0.0279089	Activated	Reactome
Mitochondrial translation	91	82	0.0315157	Activated	Reactome
Epigenetic regulation of gene expression	113	98	0.0342534	Activated	Reactome
Fanconi anemia pathway	38	37	0.037219	Activated	KEGG
