# Supplementary material for: Pathway2Targets: an open-source pathway-based approach to repurpose therapeutic drugs and prioritize human targets
Source: PeerJ. 2023 Sep 29;11:e16088. doi: 10.7717/peerj.16088 (PMC10544355; doi:10.7717/peerj.16088)
Supplement: Supplemental Information 4 [file peerj-11-16088-s004.xlsx]

## Sheet: SuppTable2-CRC_RankedTargetsDef
Target_Symbol	Target_ID	Target_Name	Associated_Disease_Count	Tractability_Count	sm_approved	sm_advancedClinical	sm_phase1	ab_approved	ab_advancedClinical	ab_phase1	pr_approved	pr_advancedClinical	pr_phase1	oc_approved	oc_advancedClinical	oc_phase1	Subcellular_Location	Safety_Liabilities	Number_Unique_Drugs	Target_in_Pathways	num_Approved_Drugs	num_Phase3	num_Phase2	num_Phase1	num_Phase4	Weighted_Score
TP53	ENSG00000141510	tumor protein p53	2515	5	FALSE	TRUE	FALSE	TRUE	FALSE	FALSE	FALSE	FALSE	FALSE	FALSE	TRUE	FALSE	Cytoplasm	1	8	9	0	3	5	0	0	2544.5
IL6	ENSG00000136244	interleukin 6	2331	4	FALSE	FALSE	FALSE	FALSE	TRUE	FALSE	FALSE	FALSE	FALSE	FALSE	FALSE	FALSE	Secreted	2	8	2	1	3	0	0	1	2348.5
VEGFA	ENSG00000112715	vascular endothelial growth factor A	2188	5	FALSE	FALSE	FALSE	FALSE	TRUE	FALSE	FALSE	FALSE	FALSE	TRUE	FALSE	FALSE	Secreted	0	11	2	4	1	0	0	4	2219.5
CD4	ENSG00000010610	CD4 molecule	2011	3	FALSE	FALSE	FALSE	FALSE	TRUE	FALSE	FALSE	FALSE	FALSE	FALSE	TRUE	FALSE	Cell membrane	0	5	2	1	2	2	0	1	2029
IFNG	ENSG00000111537	interferon gamma	1955	3	FALSE	FALSE	FALSE	FALSE	TRUE	FALSE	FALSE	FALSE	FALSE	FALSE	FALSE	FALSE	Secreted	0	3	3	1	0	1	1	1	1968.5
EGFR	ENSG00000146648	epidermal growth factor receptor	1839	7	TRUE	FALSE	FALSE	TRUE	TRUE	FALSE	FALSE	FALSE	FALSE	FALSE	TRUE	FALSE	Cell membrane	2	72	1	14	2	0	0	14	1960
NFKB1	ENSG00000109320	nuclear factor kappa B subunit 1	1773	3	FALSE	TRUE	FALSE	TRUE	FALSE	FALSE	FALSE	FALSE	FALSE	FALSE	FALSE	FALSE	Nucleus	1	1	2	0	1	0	0	0	1778.5
ESR1	ENSG00000091831	estrogen receptor 1	1695	6	TRUE	FALSE	FALSE	TRUE	FALSE	FALSE	FALSE	TRUE	FALSE	FALSE	FALSE	FALSE	[Isoform 1]: Nucleus	7	41	2	14	0	0	0	14	1772
IL1B	ENSG00000125538	interleukin 1 beta	1734	4	FALSE	FALSE	FALSE	FALSE	TRUE	FALSE	FALSE	FALSE	FALSE	TRUE	FALSE	FALSE	Cytoplasm	0	4	1	2	1	0	0	2	1750.5
CD40LG	ENSG00000102245	CD40 ligand	1708	4	FALSE	FALSE	FALSE	FALSE	FALSE	TRUE	FALSE	FALSE	FALSE	FALSE	TRUE	FALSE	Cell membrane	0	5	1	0	2	3	0	0	1724
MMP9	ENSG00000100985	matrix metallopeptidase 9	1693	7	FALSE	TRUE	FALSE	TRUE	FALSE	TRUE	FALSE	FALSE	FALSE	FALSE	FALSE	FALSE	Secreted	2	3	1	0	2	1	0	0	1704
PTGS2	ENSG00000073756	prostaglandin-endoperoxide synthase 2	1585	4	TRUE	FALSE	FALSE	TRUE	FALSE	FALSE	FALSE	FALSE	FALSE	TRUE	FALSE	FALSE	Microsome membrane	25	75	1	12	0	0	0	12	1651
MTOR	ENSG00000198793	mechanistic target of rapamycin kinase	1602	5	TRUE	FALSE	FALSE	TRUE	FALSE	FALSE	FALSE	FALSE	FALSE	FALSE	FALSE	FALSE	Endoplasmic reticulum membrane	1	25	3	1	2	6	0	1	1645
IL10	ENSG00000136634	interleukin 10	1638	2	FALSE	FALSE	FALSE	FALSE	FALSE	TRUE	FALSE	FALSE	FALSE	FALSE	FALSE	FALSE	Secreted	0	1	1	0	0	1	0	0	1643
AKT1	ENSG00000142208	AKT serine/threonine kinase 1	1561	6	FALSE	TRUE	FALSE	TRUE	FALSE	FALSE	FALSE	FALSE	FALSE	FALSE	FALSE	FALSE	Cytoplasm	5	14	9	0	2	2	0	0	1585
BCL2	ENSG00000171791	BCL2 apoptosis regulator	1534	4	TRUE	FALSE	FALSE	TRUE	FALSE	FALSE	FALSE	FALSE	FALSE	FALSE	TRUE	FALSE	Mitochondrion outer membrane	1	7	2	1	4	0	0	1	1554
IGF1	ENSG00000017427	insulin like growth factor 1	1489	3	FALSE	FALSE	FALSE	FALSE	FALSE	TRUE	FALSE	FALSE	FALSE	FALSE	FALSE	FALSE	Secreted	1	2	1	0	0	2	0	0	1495
CXCL8	ENSG00000169429	C-X-C motif chemokine ligand 8	1457	5	FALSE	FALSE	FALSE	TRUE	FALSE	TRUE	FALSE	FALSE	FALSE	FALSE	FALSE	FALSE	Secreted	1	2	1	0	0	2	0	0	1465
TLR4	ENSG00000136869	toll like receptor 4	1334	5	FALSE	TRUE	FALSE	TRUE	FALSE	FALSE	FALSE	FALSE	FALSE	FALSE	FALSE	FALSE	Cell membrane	0	3	1	0	3	0	0	0	1347.5
IL17A	ENSG00000112115	interleukin 17A	1322	3	FALSE	FALSE	FALSE	FALSE	TRUE	FALSE	FALSE	FALSE	FALSE	FALSE	TRUE	FALSE	Secreted	0	9	1	2	0	0	0	2	1341
MMP2	ENSG00000087245	matrix metallopeptidase 2	1330	6	FALSE	TRUE	FALSE	TRUE	FALSE	FALSE	FALSE	FALSE	FALSE	FALSE	FALSE	FALSE	[Isoform 1]: Secreted	1	1	1	0	1	0	0	0	1337.5
IL4	ENSG00000113520	interleukin 4	1316	1	FALSE	FALSE	FALSE	FALSE	FALSE	TRUE	FALSE	FALSE	FALSE	FALSE	FALSE	FALSE	Secreted	0	2	1	0	0	2	0	0	1322
CCL2	ENSG00000108691	C-C motif chemokine ligand 2	1303	3	FALSE	FALSE	FALSE	FALSE	FALSE	TRUE	FALSE	FALSE	FALSE	FALSE	FALSE	FALSE	Secreted	1	1	1	0	0	1	0	0	1307
ERBB2	ENSG00000141736	erb-b2 receptor tyrosine kinase 2	1164	7	TRUE	FALSE	FALSE	TRUE	TRUE	FALSE	FALSE	FALSE	FALSE	FALSE	TRUE	FALSE	[Isoform 1]: Cell membrane	1	42	1	12	1	0	0	12	1249.5
NR3C1	ENSG00000113580	nuclear receptor subfamily 3 group C member 1	1185	5	TRUE	FALSE	FALSE	TRUE	FALSE	FALSE	FALSE	FALSE	FALSE	FALSE	FALSE	FALSE	[Isoform Alpha]: Cytoplasm	33	71	2	15	0	0	0	15	1242
PPARG	ENSG00000132170	peroxisome proliferator activated receptor gamma	1186	5	TRUE	FALSE	FALSE	TRUE	FALSE	FALSE	FALSE	FALSE	FALSE	FALSE	FALSE	FALSE	Nucleus	14	35	2	7	0	0	0	7	1221
FASLG	ENSG00000117560	Fas ligand	1192	1	FALSE	FALSE	FALSE	FALSE	FALSE	FALSE	FALSE	FALSE	FALSE	FALSE	TRUE	FALSE	Cell membrane	0	1	1	0	0	1	0	0	1196
IFNA1	ENSG00000197919	interferon alpha 1	1147	1	FALSE	FALSE	FALSE	FALSE	FALSE	TRUE	FALSE	FALSE	FALSE	FALSE	FALSE	FALSE	Secreted	0	2	2	0	0	2	0	0	1154
STAT3	ENSG00000168610	signal transducer and activator of transcription 3	1145	3	FALSE	FALSE	FALSE	TRUE	FALSE	FALSE	FALSE	FALSE	FALSE	FALSE	FALSE	FALSE	Cytoplasm	1	1	2	0	0	1	0	0	1150
ICAM1	ENSG00000090339	intercellular adhesion molecule 1	1126	3	FALSE	FALSE	FALSE	TRUE	FALSE	TRUE	FALSE	FALSE	FALSE	FALSE	FALSE	FALSE	Membrane	2	2	2	0	1	1	0	0	1131.5
AR	ENSG00000169083	androgen receptor	1088	5	TRUE	FALSE	FALSE	TRUE	FALSE	FALSE	FALSE	TRUE	FALSE	FALSE	FALSE	FALSE	Nucleus	34	34	2	12	0	0	0	12	1097
VDR	ENSG00000111424	vitamin D receptor	1048	5	TRUE	FALSE	FALSE	TRUE	FALSE	FALSE	FALSE	FALSE	FALSE	FALSE	FALSE	FALSE	Nucleus	1	17	2	8	0	0	0	8	1094
SOD1	ENSG00000142168	superoxide dismutase 1	1088	2	FALSE	FALSE	FALSE	FALSE	FALSE	FALSE	FALSE	FALSE	FALSE	FALSE	FALSE	FALSE	Cytoplasm	0	1	1	0	1	0	0	0	1093.5
FN1	ENSG00000115414	fibronectin 1	1035	4	FALSE	FALSE	FALSE	FALSE	FALSE	TRUE	FALSE	FALSE	FALSE	TRUE	FALSE	FALSE	Secreted	0	5	1	1	1	2	1	1	1052
PIK3CA	ENSG00000121879	phosphatidylinositol-4,5-bisphosphate 3-kinase catalytic subunit alpha	1000	5	TRUE	FALSE	FALSE	TRUE	FALSE	FALSE	FALSE	FALSE	FALSE	FALSE	FALSE	FALSE	Cytosol	2	32	2	3	3	3	0	3	1051.5
JAK2	ENSG00000096968	Janus kinase 2	983	5	TRUE	FALSE	FALSE	TRUE	FALSE	FALSE	FALSE	FALSE	FALSE	FALSE	FALSE	FALSE	Endomembrane system	2	23	3	8	0	0	0	8	1034
NOS3	ENSG00000164867	nitric oxide synthase 3	1017	5	FALSE	TRUE	FALSE	TRUE	FALSE	FALSE	FALSE	FALSE	FALSE	FALSE	FALSE	FALSE	Cell membrane	0	2	1	0	2	0	0	0	1028
NOS2	ENSG00000007171	nitric oxide synthase 2	1010	5	FALSE	TRUE	FALSE	TRUE	FALSE	FALSE	FALSE	FALSE	FALSE	FALSE	FALSE	FALSE	Cytoplasm	0	3	2	0	2	1	0	0	1024
IL18	ENSG00000150782	interleukin 18	1015	2	FALSE	FALSE	FALSE	FALSE	FALSE	TRUE	FALSE	FALSE	FALSE	FALSE	TRUE	FALSE	Cytoplasm	0	3	1	0	1	1	1	0	1024
CSF2	ENSG00000164400	colony stimulating factor 2	1002	2	FALSE	FALSE	FALSE	FALSE	FALSE	TRUE	FALSE	FALSE	FALSE	FALSE	FALSE	FALSE	Secreted	0	4	1	0	2	2	0	0	1014
CCND1	ENSG00000110092	cyclin D1	999	3	FALSE	FALSE	TRUE	TRUE	FALSE	FALSE	FALSE	FALSE	FALSE	FALSE	FALSE	FALSE	Nucleus	1	1	4	0	0	0	1	0	1005.5
CD44	ENSG00000026508	CD44 molecule (Indian blood group)	977	2	FALSE	FALSE	FALSE	FALSE	FALSE	FALSE	FALSE	FALSE	FALSE	FALSE	FALSE	FALSE	Cell membrane	0	1	2	0	0	0	1	0	982.5
CASP3	ENSG00000164305	caspase 3	976	5	FALSE	TRUE	FALSE	TRUE	FALSE	FALSE	FALSE	FALSE	FALSE	FALSE	FALSE	FALSE	Cytoplasm	2	1	1	0	0	1	0	0	980
NCAM1	ENSG00000149294	neural cell adhesion molecule 1	952	3	FALSE	FALSE	FALSE	FALSE	FALSE	TRUE	FALSE	FALSE	FALSE	FALSE	FALSE	FALSE	[Isoform 1]: Cell membrane	0	2	2	0	0	2	0	0	961
FGF2	ENSG00000138685	fibroblast growth factor 2	908	5	FALSE	FALSE	FALSE	TRUE	FALSE	FALSE	FALSE	FALSE	FALSE	FALSE	TRUE	FALSE	Secreted	0	1	1	0	1	0	0	0	916.5
CXCL10	ENSG00000169245	C-X-C motif chemokine ligand 10	906	3	FALSE	FALSE	FALSE	FALSE	FALSE	TRUE	FALSE	FALSE	FALSE	FALSE	FALSE	FALSE	Secreted	1	2	1	0	0	2	0	0	912
MAPK3	ENSG00000102882	mitogen-activated protein kinase 3	899	4	FALSE	TRUE	FALSE	TRUE	FALSE	FALSE	FALSE	FALSE	FALSE	FALSE	FALSE	FALSE	Cytoplasm	2	5	4	0	0	2	3	0	911.5
IL1A	ENSG00000115008	interleukin 1 alpha	893	2	FALSE	FALSE	FALSE	FALSE	FALSE	TRUE	FALSE	FALSE	FALSE	FALSE	FALSE	FALSE	Nucleus	1	2	1	0	1	1	0	0	898.5
PGR	ENSG00000082175	progesterone receptor	846	5	TRUE	FALSE	FALSE	TRUE	FALSE	FALSE	FALSE	FALSE	FALSE	FALSE	FALSE	FALSE	Nucleus	4	26	2	9	0	0	0	9	898
IL13	ENSG00000169194	interleukin 13	874	2	FALSE	FALSE	FALSE	FALSE	FALSE	TRUE	FALSE	FALSE	FALSE	FALSE	FALSE	FALSE	Secreted	0	7	1	0	3	3	0	0	891.5
MUC1	ENSG00000185499	mucin 1, cell surface associated	853	4	FALSE	FALSE	FALSE	FALSE	FALSE	TRUE	FALSE	FALSE	FALSE	FALSE	TRUE	FALSE	Apical cell membrane	0	4	1	0	1	3	0	0	866.5
HMGB1	ENSG00000189403	high mobility group box 1	861	2	FALSE	FALSE	FALSE	FALSE	FALSE	FALSE	FALSE	FALSE	FALSE	FALSE	TRUE	FALSE	Nucleus	0	1	1	0	1	0	0	0	866.5
SIRT1	ENSG00000096717	sirtuin 1	861	4	FALSE	TRUE	FALSE	TRUE	FALSE	FALSE	FALSE	FALSE	FALSE	FALSE	FALSE	FALSE	Nucleus	1	1	1	0	0	1	0	0	866
PPARA	ENSG00000186951	peroxisome proliferator activated receptor alpha	813	5	TRUE	FALSE	FALSE	TRUE	FALSE	FALSE	FALSE	FALSE	FALSE	FALSE	FALSE	FALSE	Nucleus	2	25	2	7	0	0	0	7	862
IL33	ENSG00000137033	interleukin 33	838	2	FALSE	FALSE	FALSE	FALSE	FALSE	TRUE	FALSE	FALSE	FALSE	FALSE	FALSE	FALSE	Nucleus	0	3	1	0	1	2	0	0	847.5
IGF1R	ENSG00000140443	insulin like growth factor 1 receptor	807	7	FALSE	TRUE	FALSE	TRUE	TRUE	FALSE	FALSE	FALSE	FALSE	TRUE	FALSE	FALSE	Cell membrane	1	18	1	2	3	3	0	2	844.5
SERPINE1	ENSG00000106366	serpin family E member 1	838	6	FALSE	FALSE	TRUE	TRUE	FALSE	FALSE	FALSE	FALSE	FALSE	FALSE	FALSE	FALSE	Secreted	1	1	1	0	0	0	1	0	844.5
SRC	ENSG00000197122	SRC proto-oncogene, non-receptor tyrosine kinase	815	6	TRUE	FALSE	FALSE	TRUE	FALSE	FALSE	FALSE	FALSE	FALSE	FALSE	FALSE	FALSE	Cell membrane	1	11	1	4	0	0	0	4	843
MAPK8	ENSG00000107643	mitogen-activated protein kinase 8	827	5	FALSE	TRUE	FALSE	TRUE	FALSE	FALSE	FALSE	FALSE	FALSE	FALSE	FALSE	FALSE	Cytoplasm	0	3	2	0	0	3	0	0	840
TUBB4A	ENSG00000104833	tubulin beta 4A class IVa	726	4	TRUE	FALSE	FALSE	TRUE	TRUE	FALSE	FALSE	FALSE	FALSE	FALSE	TRUE	FALSE	Cytoplasm	0	59	2	10	0	0	0	10	821
CCR2	ENSG00000121807	C-C motif chemokine receptor 2	792	6	FALSE	TRUE	FALSE	TRUE	FALSE	TRUE	FALSE	FALSE	FALSE	FALSE	TRUE	FALSE	Cell membrane	0	10	1	0	1	7	0	0	817.5
CREBBP	ENSG00000005339	CREB binding protein	806	4	FALSE	FALSE	FALSE	TRUE	FALSE	FALSE	FALSE	FALSE	FALSE	FALSE	TRUE	FALSE	Cytoplasm	0	1	4	0	0	1	0	0	816
GSK3B	ENSG00000082701	glycogen synthase kinase 3 beta	798	6	TRUE	FALSE	FALSE	TRUE	FALSE	FALSE	FALSE	FALSE	FALSE	FALSE	FALSE	FALSE	Cytoplasm	2	6	3	2	0	0	0	2	815
CSF1R	ENSG00000182578	colony stimulating factor 1 receptor	772	6	TRUE	FALSE	FALSE	TRUE	FALSE	TRUE	FALSE	FALSE	FALSE	FALSE	FALSE	FALSE	Cell membrane	1	19	1	6	0	0	0	6	814
MDM2	ENSG00000135679	MDM2 proto-oncogene	787	5	FALSE	TRUE	FALSE	TRUE	FALSE	FALSE	FALSE	FALSE	FALSE	FALSE	FALSE	FALSE	Nucleus	0	3	5	0	1	2	0	0	803.5
ITGB2	ENSG00000160255	integrin subunit beta 2	776	7	TRUE	FALSE	FALSE	TRUE	FALSE	TRUE	FALSE	FALSE	FALSE	FALSE	FALSE	FALSE	Cell membrane	0	2	1	1	0	1	0	1	790
FLT3	ENSG00000122025	fms related receptor tyrosine kinase 3	710	6	TRUE	FALSE	FALSE	TRUE	FALSE	FALSE	FALSE	FALSE	FALSE	FALSE	TRUE	FALSE	Membrane	0	39	1	11	0	0	0	11	789
HGF	ENSG00000019991	hepatocyte growth factor	773	4	FALSE	FALSE	FALSE	TRUE	FALSE	TRUE	FALSE	FALSE	FALSE	FALSE	FALSE	FALSE	No data	1	2	1	0	1	1	0	0	780.5
CD40	ENSG00000101017	CD40 molecule	756	1	FALSE	FALSE	FALSE	FALSE	FALSE	TRUE	FALSE	FALSE	FALSE	FALSE	TRUE	FALSE	[Isoform I]: Cell membrane	1	9	1	0	0	7	1	0	772.5
IL2RA	ENSG00000134460	interleukin 2 receptor subunit alpha	745	1	FALSE	FALSE	FALSE	FALSE	TRUE	FALSE	FALSE	FALSE	FALSE	TRUE	FALSE	FALSE	Membrane	0	8	1	4	0	0	0	4	767
ABL1	ENSG00000097007	ABL proto-oncogene 1, non-receptor tyrosine kinase	712	5	TRUE	FALSE	FALSE	TRUE	FALSE	FALSE	FALSE	FALSE	FALSE	FALSE	FALSE	FALSE	Cytoplasm	2	24	2	8	2	0	0	8	766
TNFRSF1A	ENSG00000067182	TNF receptor superfamily member 1A	768	4	FALSE	FALSE	FALSE	TRUE	FALSE	FALSE	FALSE	FALSE	FALSE	FALSE	FALSE	FALSE	Cell membrane	7	1	1	0	0	0	1	0	760.5
APP	ENSG00000142192	amyloid beta precursor protein	723	7	FALSE	TRUE	FALSE	TRUE	TRUE	FALSE	FALSE	FALSE	FALSE	FALSE	TRUE	FALSE	Cell membrane	0	11	1	1	7	2	0	1	757.5
FLT1	ENSG00000102755	fms related receptor tyrosine kinase 1	681	6	TRUE	FALSE	FALSE	TRUE	FALSE	TRUE	FALSE	FALSE	FALSE	FALSE	TRUE	FALSE	[Isoform 1]: Cell membrane	2	45	1	9	0	0	0	9	756
MMP1	ENSG00000196611	matrix metallopeptidase 1	741	6	TRUE	FALSE	FALSE	TRUE	FALSE	FALSE	FALSE	FALSE	FALSE	FALSE	FALSE	FALSE	Secreted	3	5	1	2	0	0	0	2	753
IL5	ENSG00000113525	interleukin 5	740	2	FALSE	FALSE	FALSE	FALSE	TRUE	FALSE	FALSE	FALSE	FALSE	FALSE	FALSE	FALSE	Secreted	0	2	1	2	0	0	0	2	751
PTPN11	ENSG00000179295	protein tyrosine phosphatase non-receptor type 11	736	4	FALSE	FALSE	TRUE	TRUE	FALSE	FALSE	FALSE	FALSE	FALSE	FALSE	FALSE	FALSE	Cytoplasm	1	1	3	0	0	0	1	0	742.5
IFNB1	ENSG00000171855	interferon beta 1	731	2	FALSE	FALSE	FALSE	FALSE	FALSE	FALSE	FALSE	FALSE	FALSE	FALSE	TRUE	FALSE	Secreted	0	1	2	0	0	1	0	0	737
CDK4	ENSG00000135446	cyclin dependent kinase 4	685	5	TRUE	FALSE	FALSE	TRUE	FALSE	FALSE	FALSE	FALSE	FALSE	FALSE	FALSE	FALSE	Cytoplasm	0	17	3	6	0	0	0	6	728
EZH2	ENSG00000106462	enhancer of zeste 2 polycomb repressive complex 2 subunit	707	3	TRUE	FALSE	FALSE	FALSE	FALSE	FALSE	FALSE	FALSE	FALSE	FALSE	FALSE	FALSE	Nucleus	0	3	1	2	0	0	0	2	720
TERT	ENSG00000164362	telomerase reverse transcriptase	711	2	FALSE	FALSE	FALSE	TRUE	FALSE	FALSE	FALSE	FALSE	FALSE	FALSE	TRUE	FALSE	Nucleus	0	2	2	0	1	1	0	0	719.5
TNFSF11	ENSG00000120659	TNF superfamily member 11	711	1	FALSE	FALSE	FALSE	FALSE	TRUE	FALSE	FALSE	FALSE	FALSE	FALSE	FALSE	FALSE	[Isoform 1]: Cell membrane	0	1	1	1	0	0	0	1	717
TFRC	ENSG00000072274	transferrin receptor	705	3	FALSE	FALSE	FALSE	FALSE	FALSE	FALSE	FALSE	FALSE	FALSE	FALSE	TRUE	FALSE	Cell membrane	0	3	1	0	1	0	2	0	714.5
NR3C2	ENSG00000151623	nuclear receptor subfamily 3 group C member 2	676	5	TRUE	FALSE	FALSE	TRUE	FALSE	FALSE	FALSE	FALSE	FALSE	FALSE	FALSE	FALSE	Cytoplasm	3	16	2	5	0	0	0	5	708
CSF1	ENSG00000184371	colony stimulating factor 1	703	2	FALSE	FALSE	FALSE	FALSE	FALSE	TRUE	FALSE	FALSE	FALSE	FALSE	FALSE	FALSE	Cell membrane	1	2	1	0	0	2	0	0	708
JAK3	ENSG00000105639	Janus kinase 3	675	5	TRUE	FALSE	FALSE	TRUE	FALSE	FALSE	FALSE	FALSE	FALSE	FALSE	FALSE	FALSE	Endomembrane system	0	13	1	3	2	0	0	3	706
LYN	ENSG00000254087	LYN proto-oncogene, Src family tyrosine kinase	676	5	TRUE	FALSE	FALSE	TRUE	FALSE	FALSE	FALSE	FALSE	FALSE	FALSE	FALSE	FALSE	Cell membrane	1	9	2	2	0	0	0	2	696
JAK1	ENSG00000162434	Janus kinase 1	642	4	TRUE	FALSE	FALSE	TRUE	FALSE	FALSE	FALSE	FALSE	FALSE	FALSE	FALSE	FALSE	Endomembrane system	0	19	3	7	0	0	0	7	689
CCR5	ENSG00000160791	C-C motif chemokine receptor 5	657	6	TRUE	FALSE	FALSE	TRUE	FALSE	TRUE	FALSE	FALSE	FALSE	FALSE	FALSE	FALSE	Cell membrane	0	14	1	1	5	0	0	1	688.5
CD28	ENSG00000178562	CD28 molecule	679	2	FALSE	FALSE	FALSE	FALSE	FALSE	TRUE	FALSE	FALSE	FALSE	FALSE	FALSE	FALSE	Membrane	0	2	2	0	0	2	0	0	687
INSR	ENSG00000171105	insulin receptor	631	5	FALSE	TRUE	FALSE	TRUE	FALSE	FALSE	FALSE	FALSE	FALSE	TRUE	FALSE	FALSE	Cell membrane	1	20	1	10	0	0	0	10	685
HLA-DRB1	ENSG00000196126	major histocompatibility complex, class II, DR beta 1	668	4	FALSE	TRUE	FALSE	FALSE	FALSE	TRUE	FALSE	FALSE	FALSE	FALSE	FALSE	FALSE	Cell membrane	0	3	2	0	1	2	0	0	680.5
IL6ST	ENSG00000134352	interleukin 6 cytokine family signal transducer	669	3	FALSE	FALSE	FALSE	FALSE	TRUE	FALSE	FALSE	FALSE	FALSE	FALSE	FALSE	FALSE	[Isoform 1]: Cell membrane	0	1	1	1	0	0	0	1	677
MAPK14	ENSG00000112062	mitogen-activated protein kinase 14	632	5	FALSE	TRUE	FALSE	TRUE	FALSE	FALSE	FALSE	FALSE	FALSE	FALSE	FALSE	FALSE	Cytoplasm	0	21	3	0	2	10	0	0	674
IL15	ENSG00000164136	interleukin 15	670	1	FALSE	FALSE	FALSE	FALSE	FALSE	TRUE	FALSE	FALSE	FALSE	FALSE	FALSE	FALSE	[Isoform IL15-S48AA]: Secreted	0	1	1	0	0	1	0	0	674
IL6R	ENSG00000160712	interleukin 6 receptor	650	3	FALSE	FALSE	FALSE	FALSE	TRUE	FALSE	FALSE	FALSE	FALSE	FALSE	FALSE	FALSE	[Isoform 1]: Cell membrane	1	5	2	3	0	0	0	3	667
BCL2L1	ENSG00000171552	BCL2 like 1	647	4	FALSE	TRUE	FALSE	TRUE	FALSE	FALSE	FALSE	FALSE	FALSE	FALSE	FALSE	FALSE	[Isoform Bcl-X(L)]: Mitochondrion inner membrane	0	3	1	0	3	0	0	0	659.5
DNMT1	ENSG00000130816	DNA methyltransferase 1	628	5	TRUE	FALSE	FALSE	TRUE	FALSE	FALSE	FALSE	FALSE	FALSE	FALSE	FALSE	FALSE	Nucleus	0	2	3	2	0	0	0	2	644
PRKDC	ENSG00000253729	protein kinase, DNA-activated, catalytic subunit	634	4	FALSE	TRUE	FALSE	TRUE	FALSE	FALSE	FALSE	FALSE	FALSE	FALSE	FALSE	FALSE	Nucleus	0	1	1	0	0	1	0	0	641
MMP3	ENSG00000149968	matrix metallopeptidase 3	626	6	FALSE	TRUE	FALSE	TRUE	FALSE	FALSE	FALSE	FALSE	FALSE	FALSE	FALSE	FALSE	Secreted	2	1	1	0	1	0	0	0	631.5
IL22	ENSG00000127318	interleukin 22	621	2	FALSE	FALSE	FALSE	FALSE	FALSE	TRUE	FALSE	FALSE	FALSE	FALSE	FALSE	FALSE	Secreted	0	1	1	0	0	1	0	0	626
PIK3R1	ENSG00000145675	phosphoinositide-3-kinase regulatory subunit 1	577	5	FALSE	TRUE	FALSE	TRUE	FALSE	FALSE	FALSE	FALSE	FALSE	FALSE	FALSE	FALSE	Cytosol	0	24	2	0	3	8	0	0	620.5
SDC1	ENSG00000115884	syndecan 1	601	3	FALSE	FALSE	FALSE	FALSE	FALSE	FALSE	FALSE	FALSE	FALSE	FALSE	FALSE	FALSE	Membrane	0	1	1	0	0	0	1	0	606.5
CDK6	ENSG00000105810	cyclin dependent kinase 6	571	5	TRUE	FALSE	FALSE	TRUE	FALSE	FALSE	FALSE	FALSE	FALSE	FALSE	FALSE	FALSE	Cytoplasm	1	12	1	6	0	0	0	6	605
IL1R1	ENSG00000115594	interleukin 1 receptor type 1	593	2	FALSE	FALSE	FALSE	FALSE	FALSE	TRUE	FALSE	FALSE	FALSE	TRUE	FALSE	FALSE	Membrane	0	3	1	1	0	2	0	1	604
DNMT3A	ENSG00000119772	DNA methyltransferase 3 alpha	586	4	TRUE	FALSE	FALSE	TRUE	FALSE	FALSE	FALSE	FALSE	FALSE	FALSE	FALSE	FALSE	Nucleus	0	2	3	2	0	0	0	2	601
HSP90AA1	ENSG00000080824	heat shock protein 90 alpha family class A member 1	573	6	FALSE	TRUE	FALSE	TRUE	FALSE	FALSE	FALSE	FALSE	FALSE	FALSE	TRUE	FALSE	Nucleus	0	10	3	0	5	1	0	0	600.5
SYK	ENSG00000165025	spleen associated tyrosine kinase	572	6	TRUE	FALSE	FALSE	TRUE	FALSE	FALSE	FALSE	FALSE	FALSE	FALSE	FALSE	FALSE	Cell membrane	1	12	1	2	0	4	1	2	599.5
TOP2A	ENSG00000131747	DNA topoisomerase II alpha	539	6	TRUE	FALSE	FALSE	TRUE	FALSE	TRUE	FALSE	FALSE	FALSE	FALSE	FALSE	FALSE	Cytoplasm	0	24	4	8	0	0	0	8	597
PIK3CB	ENSG00000051382	phosphatidylinositol-4,5-bisphosphate 3-kinase catalytic subunit beta	553	3	FALSE	TRUE	FALSE	TRUE	FALSE	FALSE	FALSE	FALSE	FALSE	FALSE	FALSE	FALSE	Cytoplasm	0	29	2	0	3	4	0	0	595.5
POLE	ENSG00000177084	DNA polymerase epsilon, catalytic subunit	558	3	TRUE	FALSE	FALSE	TRUE	FALSE	FALSE	FALSE	FALSE	FALSE	FALSE	FALSE	FALSE	Nucleus	0	7	10	5	0	0	0	5	593
WEE1	ENSG00000166483	WEE1 G2 checkpoint kinase	575	5	FALSE	TRUE	FALSE	TRUE	FALSE	FALSE	FALSE	FALSE	FALSE	FALSE	FALSE	FALSE	Nucleus	0	1	7	0	0	1	0	0	589
CASP1	ENSG00000137752	caspase 1	570	6	FALSE	TRUE	FALSE	TRUE	FALSE	FALSE	FALSE	FALSE	FALSE	FALSE	FALSE	FALSE	Cytoplasm	1	3	2	0	0	3	0	0	582
PRKCA	ENSG00000154229	protein kinase C alpha	560	6	TRUE	FALSE	FALSE	TRUE	FALSE	FALSE	FALSE	FALSE	FALSE	FALSE	FALSE	FALSE	Cytoplasm	1	5	3	1	1	2	0	1	578.5
PIK3CD	ENSG00000171608	phosphatidylinositol-4,5-bisphosphate 3-kinase catalytic subunit delta	502	4	TRUE	FALSE	FALSE	TRUE	FALSE	FALSE	FALSE	FALSE	FALSE	FALSE	FALSE	FALSE	Cytoplasm	0	45	2	6	2	0	0	6	574
RXRA	ENSG00000186350	retinoid X receptor alpha	534	5	TRUE	FALSE	FALSE	TRUE	FALSE	FALSE	FALSE	FALSE	FALSE	FALSE	FALSE	FALSE	Nucleus	2	7	2	5	0	0	0	5	559
NOD2	ENSG00000167207	nucleotide binding oligomerization domain containing 2	547	4	TRUE	FALSE	FALSE	TRUE	FALSE	FALSE	FALSE	FALSE	FALSE	FALSE	FALSE	FALSE	Cell membrane	0	2	1	1	0	0	0	1	557
MAPK1	ENSG00000100030	mitogen-activated protein kinase 1	539	5	FALSE	TRUE	FALSE	TRUE	FALSE	FALSE	FALSE	FALSE	FALSE	FALSE	FALSE	FALSE	Cytoplasm	2	5	2	0	0	2	3	0	550.5
THRA	ENSG00000126351	thyroid hormone receptor alpha	526	5	TRUE	FALSE	FALSE	TRUE	FALSE	FALSE	FALSE	FALSE	FALSE	FALSE	FALSE	FALSE	Nucleus	2	6	2	5	0	0	0	5	550
TNFSF13B	ENSG00000102524	TNF superfamily member 13b	534	3	FALSE	FALSE	FALSE	FALSE	TRUE	FALSE	FALSE	FALSE	FALSE	FALSE	TRUE	FALSE	Cell membrane	0	5	1	1	2	0	0	1	549
COL1A2	ENSG00000164692	collagen type I alpha 2 chain	537	0	FALSE	FALSE	FALSE	FALSE	FALSE	FALSE	FALSE	FALSE	FALSE	TRUE	FALSE	FALSE	Secreted	0	2	1	2	0	0	0	2	546
MAP2K1	ENSG00000169032	mitogen-activated protein kinase kinase 1	498	6	TRUE	FALSE	FALSE	TRUE	FALSE	FALSE	FALSE	FALSE	FALSE	FALSE	FALSE	FALSE	Cytoplasm	0	17	2	7	0	0	0	7	544
CD86	ENSG00000114013	CD86 molecule	533	0	FALSE	FALSE	FALSE	FALSE	FALSE	FALSE	FALSE	FALSE	FALSE	TRUE	FALSE	FALSE	Cell membrane	0	2	1	2	0	0	0	2	542
NFKB2	ENSG00000077150	nuclear factor kappa B subunit 2	531	3	FALSE	TRUE	FALSE	FALSE	FALSE	FALSE	FALSE	FALSE	FALSE	FALSE	FALSE	FALSE	Nucleus	0	1	3	0	1	0	0	0	539.5
OPRM1	ENSG00000112038	opioid receptor mu 1	462	4	TRUE	FALSE	FALSE	TRUE	FALSE	FALSE	FALSE	FALSE	FALSE	FALSE	TRUE	FALSE	Cell membrane	38	84	1	20	0	0	0	20	535
ANGPT1	ENSG00000154188	angiopoietin 1	525	1	FALSE	FALSE	FALSE	FALSE	FALSE	FALSE	FALSE	FALSE	FALSE	FALSE	TRUE	FALSE	Secreted	0	2	1	0	1	0	1	0	531
POLD1	ENSG00000062822	DNA polymerase delta 1, catalytic subunit	496	3	TRUE	FALSE	FALSE	TRUE	FALSE	FALSE	FALSE	FALSE	FALSE	FALSE	FALSE	FALSE	Nucleus	0	7	6	5	0	0	0	5	527
CD80	ENSG00000121594	CD80 molecule	516	1	FALSE	FALSE	FALSE	FALSE	FALSE	TRUE	FALSE	FALSE	FALSE	TRUE	FALSE	FALSE	Membrane	0	3	1	2	0	0	0	2	527
HDAC2	ENSG00000196591	histone deacetylase 2	479	5	TRUE	FALSE	FALSE	TRUE	FALSE	FALSE	FALSE	FALSE	FALSE	TRUE	FALSE	FALSE	Nucleus	0	11	6	5	3	0	0	5	520.5
PARP1	ENSG00000143799	poly(ADP-ribose) polymerase 1	480	5	TRUE	FALSE	FALSE	TRUE	FALSE	FALSE	FALSE	FALSE	FALSE	FALSE	FALSE	FALSE	Nucleus	0	10	4	7	0	0	0	7	520
RARA	ENSG00000131759	retinoic acid receptor alpha	484	5	TRUE	FALSE	FALSE	TRUE	FALSE	FALSE	FALSE	FALSE	FALSE	FALSE	FALSE	FALSE	Nucleus	2	9	2	7	0	0	0	7	517
PRKCB	ENSG00000166501	protein kinase C beta	495	3	TRUE	FALSE	FALSE	TRUE	FALSE	FALSE	FALSE	FALSE	FALSE	FALSE	FALSE	FALSE	Cytoplasm	0	6	3	1	2	1	0	1	514
ANGPT2	ENSG00000091879	angiopoietin 2	497	2	FALSE	FALSE	FALSE	FALSE	FALSE	TRUE	FALSE	FALSE	FALSE	FALSE	TRUE	FALSE	Secreted	0	7	1	0	2	2	0	0	512
IFNA2	ENSG00000188379	interferon alpha 2	502	3	FALSE	FALSE	FALSE	FALSE	FALSE	TRUE	FALSE	FALSE	FALSE	FALSE	FALSE	FALSE	Secreted	0	2	2	0	0	2	0	0	511
RPL38	ENSG00000172809	ribosomal protein L38	487	4	TRUE	FALSE	FALSE	FALSE	FALSE	FALSE	FALSE	FALSE	FALSE	FALSE	TRUE	FALSE	Cytoplasm	0	3	11	1	0	2	0	1	510
TUBB4B	ENSG00000188229	tubulin beta 4B class IVb	412	4	TRUE	FALSE	FALSE	TRUE	TRUE	FALSE	FALSE	FALSE	FALSE	FALSE	TRUE	FALSE	Cytoplasm	0	59	2	11	0	0	0	11	510
MCL1	ENSG00000143384	MCL1 apoptosis regulator, BCL2 family member	498	5	FALSE	TRUE	FALSE	TRUE	FALSE	FALSE	FALSE	FALSE	FALSE	FALSE	FALSE	FALSE	Membrane	0	2	1	0	2	0	0	0	509
CSF3R	ENSG00000119535	colony stimulating factor 3 receptor	491	1	FALSE	FALSE	FALSE	FALSE	FALSE	FALSE	FALSE	FALSE	FALSE	TRUE	FALSE	FALSE	[Isoform 2]: Secreted	0	6	1	3	0	0	0	3	508
HDAC1	ENSG00000116478	histone deacetylase 1	470	3	TRUE	FALSE	FALSE	TRUE	FALSE	FALSE	FALSE	FALSE	FALSE	TRUE	FALSE	FALSE	Nucleus	1	11	8	5	1	0	0	5	506.5
PPIA	ENSG00000196262	peptidylprolyl isomerase A	492	5	FALSE	FALSE	FALSE	TRUE	FALSE	FALSE	FALSE	FALSE	FALSE	TRUE	FALSE	FALSE	Cytoplasm	0	3	1	1	0	0	0	1	504
PRKCD	ENSG00000163932	protein kinase C delta	489	4	TRUE	FALSE	FALSE	TRUE	FALSE	FALSE	FALSE	FALSE	FALSE	FALSE	TRUE	FALSE	Cytoplasm	1	5	2	1	0	2	0	1	503
RPS6KB1	ENSG00000108443	ribosomal protein S6 kinase B1	487	5	FALSE	FALSE	TRUE	TRUE	FALSE	FALSE	FALSE	FALSE	FALSE	FALSE	FALSE	FALSE	Synapse	0	5	1	0	0	0	5	0	500.5
CDK2	ENSG00000123374	cyclin dependent kinase 2	463	5	FALSE	TRUE	FALSE	TRUE	FALSE	FALSE	FALSE	FALSE	FALSE	FALSE	FALSE	FALSE	Cytoplasm	3	14	12	0	2	5	0	0	496
TOP1	ENSG00000198900	DNA topoisomerase I	450	6	TRUE	FALSE	FALSE	TRUE	TRUE	FALSE	FALSE	FALSE	FALSE	FALSE	TRUE	FALSE	Nucleus	0	18	3	4	1	0	0	4	490.5
AKT2	ENSG00000105221	AKT serine/threonine kinase 2	465	5	FALSE	TRUE	FALSE	TRUE	FALSE	FALSE	FALSE	FALSE	FALSE	FALSE	FALSE	FALSE	Cytoplasm	2	13	6	0	2	2	0	0	490
LCK	ENSG00000182866	LCK proto-oncogene, Src family tyrosine kinase	469	6	TRUE	FALSE	FALSE	TRUE	FALSE	FALSE	FALSE	FALSE	FALSE	FALSE	FALSE	FALSE	Cell membrane	3	8	3	3	0	0	0	3	489
NPM1	ENSG00000181163	nucleophosmin 1	473	3	TRUE	FALSE	FALSE	TRUE	FALSE	FALSE	FALSE	FALSE	FALSE	FALSE	FALSE	FALSE	Nucleus	0	2	4	2	0	0	0	2	488
HDAC4	ENSG00000068024	histone deacetylase 4	454	5	TRUE	FALSE	FALSE	TRUE	FALSE	FALSE	FALSE	FALSE	FALSE	TRUE	FALSE	FALSE	Nucleus	0	9	2	4	3	0	0	4	486.5
IL4R	ENSG00000077238	interleukin 4 receptor	476	1	FALSE	FALSE	FALSE	FALSE	TRUE	FALSE	FALSE	FALSE	FALSE	FALSE	TRUE	FALSE	Cell membrane	0	2	1	1	0	0	0	1	483
THRB	ENSG00000151090	thyroid hormone receptor beta	451	5	TRUE	FALSE	FALSE	TRUE	FALSE	FALSE	FALSE	FALSE	FALSE	FALSE	FALSE	FALSE	Nucleus	0	9	2	5	0	0	0	5	482
TEK	ENSG00000120156	TEK receptor tyrosine kinase	464	6	TRUE	FALSE	FALSE	TRUE	FALSE	FALSE	FALSE	FALSE	FALSE	FALSE	FALSE	FALSE	Cell membrane	1	7	1	2	0	0	0	2	482
TYMS	ENSG00000176890	thymidylate synthetase	446	5	TRUE	FALSE	FALSE	TRUE	FALSE	FALSE	FALSE	FALSE	FALSE	FALSE	FALSE	FALSE	Nucleus	0	10	2	6	0	0	0	6	481
NR1H4	ENSG00000012504	nuclear receptor subfamily 1 group H member 4	461	5	TRUE	FALSE	FALSE	TRUE	FALSE	FALSE	FALSE	FALSE	FALSE	FALSE	TRUE	FALSE	Nucleus	3	8	2	3	1	0	0	3	480.5
CHEK2	ENSG00000183765	checkpoint kinase 2	457	5	FALSE	TRUE	FALSE	TRUE	FALSE	FALSE	FALSE	FALSE	FALSE	FALSE	FALSE	FALSE	[Isoform 2]: Nucleus	0	2	6	0	0	1	1	0	471.5
IKBKB	ENSG00000104365	inhibitor of nuclear factor kappa B kinase subunit beta	458	4	FALSE	TRUE	FALSE	TRUE	FALSE	FALSE	FALSE	FALSE	FALSE	FALSE	FALSE	FALSE	Cytoplasm	0	3	3	0	1	2	0	0	471.5
DHFR	ENSG00000228716	dihydrofolate reductase	446	5	TRUE	FALSE	FALSE	TRUE	FALSE	FALSE	FALSE	FALSE	FALSE	FALSE	FALSE	FALSE	Mitochondrion	0	6	2	2	0	0	0	2	465
GHR	ENSG00000112964	growth hormone receptor	449	1	TRUE	FALSE	FALSE	FALSE	FALSE	FALSE	FALSE	FALSE	FALSE	TRUE	FALSE	FALSE	Cell membrane	0	4	1	3	0	0	0	3	464
SNAP25	ENSG00000132639	synaptosome associated protein 25	445	0	FALSE	FALSE	FALSE	FALSE	FALSE	FALSE	FALSE	FALSE	FALSE	TRUE	FALSE	FALSE	Cytoplasm	0	5	1	4	0	0	0	4	463
RELA	ENSG00000173039	RELA proto-oncogene, NF-kB subunit	452	4	FALSE	TRUE	FALSE	TRUE	FALSE	FALSE	FALSE	FALSE	FALSE	FALSE	FALSE	FALSE	Nucleus	0	1	4	0	1	0	0	0	462.5
IL2RB	ENSG00000100385	interleukin 2 receptor subunit beta	444	3	FALSE	FALSE	FALSE	FALSE	FALSE	FALSE	FALSE	FALSE	FALSE	TRUE	FALSE	FALSE	Cell membrane	0	5	1	2	0	0	0	2	459
TNFRSF8	ENSG00000120949	TNF receptor superfamily member 8	444	2	FALSE	FALSE	FALSE	FALSE	TRUE	FALSE	FALSE	FALSE	FALSE	FALSE	FALSE	FALSE	[Isoform 1]: Cell membrane	0	4	1	1	0	1	0	1	455
CCR1	ENSG00000163823	C-C motif chemokine receptor 1	430	5	FALSE	TRUE	FALSE	TRUE	FALSE	FALSE	FALSE	FALSE	FALSE	FALSE	FALSE	FALSE	Cell membrane	0	3	1	0	0	3	0	0	442
IL21	ENSG00000138684	interleukin 21	437	2	FALSE	FALSE	FALSE	FALSE	FALSE	FALSE	FALSE	FALSE	FALSE	FALSE	TRUE	FALSE	Secreted	0	1	1	0	0	1	0	0	442
TNFSF12	ENSG00000239697	TNF superfamily member 12	430	2	FALSE	FALSE	FALSE	FALSE	FALSE	TRUE	FALSE	FALSE	FALSE	FALSE	FALSE	FALSE	Cell membrane	0	2	1	0	0	1	1	0	436.5
HAVCR2	ENSG00000135077	hepatitis A virus cellular receptor 2	426	3	FALSE	FALSE	FALSE	FALSE	FALSE	TRUE	FALSE	FALSE	FALSE	FALSE	FALSE	FALSE	Membrane	0	2	1	0	1	1	0	0	434.5
IFNAR1	ENSG00000142166	interferon alpha and beta receptor subunit 1	395	2	FALSE	FALSE	FALSE	FALSE	TRUE	FALSE	FALSE	FALSE	FALSE	TRUE	FALSE	FALSE	[Isoform 1]: Cell membrane	0	12	2	7	0	0	0	7	432
IL23A	ENSG00000110944	interleukin 23 subunit alpha	411	3	FALSE	FALSE	FALSE	FALSE	TRUE	FALSE	FALSE	FALSE	FALSE	FALSE	FALSE	FALSE	Secreted	0	5	1	3	0	0	0	3	429
IL9	ENSG00000145839	interleukin 9	425	1	FALSE	FALSE	FALSE	FALSE	FALSE	TRUE	FALSE	FALSE	FALSE	FALSE	FALSE	FALSE	Secreted	0	1	1	0	0	1	0	0	429
CCL11	ENSG00000172156	C-C motif chemokine ligand 11	423	2	FALSE	FALSE	FALSE	FALSE	FALSE	TRUE	FALSE	FALSE	FALSE	FALSE	FALSE	FALSE	Secreted	0	1	1	0	0	1	0	0	428
RPS6KA3	ENSG00000177189	ribosomal protein S6 kinase A3	422	4	FALSE	FALSE	TRUE	TRUE	FALSE	FALSE	FALSE	FALSE	FALSE	FALSE	FALSE	FALSE	Nucleus	1	1	1	0	0	0	1	0	426.5
TNFRSF9	ENSG00000049249	TNF receptor superfamily member 9	412	2	FALSE	FALSE	FALSE	FALSE	FALSE	TRUE	FALSE	FALSE	FALSE	FALSE	FALSE	FALSE	Membrane	0	2	1	0	1	1	0	0	419.5
IFNGR1	ENSG00000027697	interferon gamma receptor 1	406	3	FALSE	FALSE	FALSE	FALSE	FALSE	FALSE	FALSE	FALSE	FALSE	TRUE	FALSE	FALSE	Cell membrane	0	1	3	1	0	0	0	1	416
TXN	ENSG00000136810	thioredoxin	403	5	FALSE	TRUE	FALSE	TRUE	FALSE	FALSE	FALSE	FALSE	FALSE	FALSE	FALSE	FALSE	Nucleus	0	1	1	0	0	1	0	0	411
FYN	ENSG00000010810	FYN proto-oncogene, Src family tyrosine kinase	395	5	TRUE	FALSE	FALSE	TRUE	FALSE	FALSE	FALSE	FALSE	FALSE	FALSE	FALSE	FALSE	Cytoplasm	1	6	3	1	0	0	0	1	410
POLE3	ENSG00000148229	DNA polymerase epsilon 3, accessory subunit	376	1	TRUE	FALSE	FALSE	FALSE	FALSE	FALSE	FALSE	FALSE	FALSE	FALSE	FALSE	FALSE	Nucleus	0	7	10	5	0	0	0	5	409
PRKCQ	ENSG00000065675	protein kinase C theta	394	5	TRUE	FALSE	FALSE	TRUE	FALSE	FALSE	FALSE	FALSE	FALSE	FALSE	FALSE	FALSE	Cytoplasm	1	4	2	1	0	2	0	1	408
BIRC3	ENSG00000023445	baculoviral IAP repeat containing 3	393	3	FALSE	TRUE	FALSE	TRUE	FALSE	FALSE	FALSE	FALSE	FALSE	FALSE	FALSE	FALSE	Cytoplasm	0	1	1	0	0	1	0	0	399
ITK	ENSG00000113263	IL2 inducible T cell kinase	382	5	TRUE	FALSE	FALSE	TRUE	FALSE	FALSE	FALSE	FALSE	FALSE	FALSE	FALSE	FALSE	Cytoplasm	0	3	1	2	1	0	0	2	398.5
IL2RG	ENSG00000147168	interleukin 2 receptor subunit gamma	385	2	FALSE	FALSE	FALSE	FALSE	FALSE	FALSE	FALSE	FALSE	FALSE	FALSE	TRUE	FALSE	Cell membrane	0	1	1	0	0	1	0	0	390
AURKA	ENSG00000087586	aurora kinase A	355	5	FALSE	TRUE	FALSE	TRUE	FALSE	FALSE	FALSE	FALSE	FALSE	FALSE	FALSE	FALSE	Cytoplasm	2	19	7	0	1	6	0	0	389.5
S1PR1	ENSG00000170989	sphingosine-1-phosphate receptor 1	340	5	TRUE	FALSE	FALSE	TRUE	FALSE	FALSE	FALSE	FALSE	FALSE	FALSE	FALSE	FALSE	Cell membrane	0	12	1	7	0	0	0	7	379
PRIM1	ENSG00000198056	DNA primase subunit 1	346	2	TRUE	FALSE	FALSE	FALSE	FALSE	FALSE	FALSE	FALSE	FALSE	FALSE	FALSE	FALSE	No data	0	7	8	5	0	0	0	5	378
CD27	ENSG00000139193	CD27 molecule	374	1	FALSE	FALSE	FALSE	FALSE	FALSE	TRUE	FALSE	FALSE	FALSE	FALSE	FALSE	FALSE	Membrane	0	1	1	0	0	1	0	0	378
CDK1	ENSG00000170312	cyclin dependent kinase 1	341	4	FALSE	TRUE	FALSE	TRUE	FALSE	FALSE	FALSE	FALSE	FALSE	FALSE	FALSE	FALSE	Nucleus	0	12	13	0	2	4	0	0	377
POLD3	ENSG00000077514	DNA polymerase delta 3, accessory subunit	343	2	TRUE	FALSE	FALSE	FALSE	FALSE	FALSE	FALSE	FALSE	FALSE	FALSE	FALSE	FALSE	Cytoplasm	0	7	6	4	0	0	0	4	370
TYK2	ENSG00000105397	tyrosine kinase 2	337	5	TRUE	FALSE	FALSE	TRUE	FALSE	FALSE	FALSE	FALSE	FALSE	FALSE	FALSE	FALSE	Cytosol	0	12	2	3	2	0	0	3	368
POLE2	ENSG00000100479	DNA polymerase epsilon 2, accessory subunit	329	2	TRUE	FALSE	FALSE	FALSE	FALSE	FALSE	FALSE	FALSE	FALSE	FALSE	FALSE	FALSE	Nucleus	0	7	10	5	0	0	0	5	363
LAMA5	ENSG00000130702	laminin subunit alpha 5	349	0	FALSE	FALSE	FALSE	FALSE	FALSE	FALSE	FALSE	FALSE	FALSE	TRUE	FALSE	FALSE	Secreted	0	1	1	1	0	0	0	1	354
PRKCG	ENSG00000126583	protein kinase C gamma	334	4	TRUE	FALSE	FALSE	TRUE	FALSE	FALSE	FALSE	FALSE	FALSE	FALSE	FALSE	FALSE	Cytoplasm	0	4	1	1	0	2	0	1	348
POLA1	ENSG00000101868	DNA polymerase alpha 1, catalytic subunit	312	4	TRUE	FALSE	FALSE	TRUE	FALSE	FALSE	FALSE	FALSE	FALSE	FALSE	FALSE	FALSE	Nucleus	0	7	8	5	0	0	0	5	346
CDK12	ENSG00000167258	cyclin dependent kinase 12	334	4	FALSE	TRUE	FALSE	TRUE	FALSE	FALSE	FALSE	FALSE	FALSE	FALSE	FALSE	FALSE	Nucleus	0	4	1	0	0	2	2	0	346
IL17RA	ENSG00000177663	interleukin 17 receptor A	339	2	FALSE	FALSE	FALSE	FALSE	TRUE	FALSE	FALSE	FALSE	FALSE	FALSE	FALSE	FALSE	[Isoform 1]: Cell membrane	0	1	1	1	0	0	0	1	346
ITGB1	ENSG00000150093	integrin subunit beta 1	333	5	FALSE	TRUE	FALSE	TRUE	FALSE	TRUE	FALSE	FALSE	FALSE	FALSE	TRUE	FALSE	Cell membrane	0	3	1	0	1	2	0	0	345.5
IL17F	ENSG00000112116	interleukin 17F	337	1	FALSE	FALSE	FALSE	FALSE	FALSE	TRUE	FALSE	FALSE	FALSE	FALSE	TRUE	FALSE	Secreted	0	2	1	0	1	1	0	0	343.5
POLD2	ENSG00000106628	DNA polymerase delta 2, accessory subunit	308	3	TRUE	FALSE	FALSE	FALSE	FALSE	FALSE	FALSE	FALSE	FALSE	FALSE	FALSE	FALSE	Nucleus	0	7	6	5	0	0	0	5	339
PLK1	ENSG00000166851	polo like kinase 1	317	5	FALSE	TRUE	FALSE	TRUE	FALSE	FALSE	FALSE	FALSE	FALSE	FALSE	FALSE	FALSE	Nucleus	1	7	6	0	1	2	2	0	337.5
MAP2K2	ENSG00000126934	mitogen-activated protein kinase kinase 2	292	6	TRUE	FALSE	FALSE	TRUE	FALSE	FALSE	FALSE	FALSE	FALSE	FALSE	FALSE	FALSE	Cytoplasm	0	16	1	7	0	0	0	7	336
PRIM2	ENSG00000146143	DNA primase subunit 2	303	2	TRUE	FALSE	FALSE	FALSE	FALSE	FALSE	FALSE	FALSE	FALSE	FALSE	FALSE	FALSE	Nucleoplasm	0	7	8	5	0	0	0	5	335
POLD4	ENSG00000175482	DNA polymerase delta 4, accessory subunit	304	2	TRUE	FALSE	FALSE	FALSE	FALSE	FALSE	FALSE	FALSE	FALSE	FALSE	FALSE	FALSE	Nucleus	0	7	6	5	0	0	0	5	334
HCK	ENSG00000101336	HCK proto-oncogene, Src family tyrosine kinase	314	6	TRUE	FALSE	FALSE	TRUE	FALSE	FALSE	FALSE	FALSE	FALSE	FALSE	FALSE	FALSE	[Isoform 1]: Lysosome	0	6	1	2	0	0	0	2	333
PTK2B	ENSG00000120899	protein tyrosine kinase 2 beta	323	5	FALSE	TRUE	FALSE	TRUE	FALSE	FALSE	FALSE	FALSE	FALSE	FALSE	FALSE	FALSE	Cytoplasm	0	2	1	0	0	1	1	0	332.5
CUL4A	ENSG00000139842	cullin 4A	314	3	TRUE	FALSE	FALSE	FALSE	FALSE	FALSE	FALSE	FALSE	FALSE	FALSE	FALSE	FALSE	Nucleoplasm	0	4	1	3	0	0	0	3	331
POLA2	ENSG00000014138	DNA polymerase alpha 2, accessory subunit	300	2	TRUE	FALSE	FALSE	FALSE	FALSE	FALSE	FALSE	FALSE	FALSE	FALSE	FALSE	FALSE	Nucleus	0	7	8	4	0	0	0	4	329
TNFSF13	ENSG00000161955	TNF superfamily member 13	324	2	FALSE	FALSE	FALSE	FALSE	FALSE	FALSE	FALSE	FALSE	FALSE	FALSE	TRUE	FALSE	Secreted	0	1	1	0	0	1	0	0	329
IL12B	ENSG00000113302	interleukin 12B	315	3	FALSE	FALSE	FALSE	FALSE	TRUE	FALSE	FALSE	FALSE	FALSE	FALSE	FALSE	FALSE	Secreted	0	3	1	1	1	1	0	1	327.5
TNFRSF10B	ENSG00000120889	TNF receptor superfamily member 10b	314	1	FALSE	FALSE	FALSE	FALSE	FALSE	TRUE	FALSE	FALSE	FALSE	FALSE	TRUE	FALSE	Membrane	0	5	1	0	1	3	1	0	326
XPO1	ENSG00000082898	exportin 1	314	4	TRUE	FALSE	FALSE	FALSE	FALSE	FALSE	FALSE	FALSE	FALSE	FALSE	FALSE	FALSE	Cytoplasm	0	1	3	1	0	0	0	1	325
NR1H3	ENSG00000025434	nuclear receptor subfamily 1 group H member 3	313	5	FALSE	FALSE	TRUE	TRUE	FALSE	FALSE	FALSE	FALSE	FALSE	FALSE	FALSE	FALSE	Nucleus	1	3	2	0	0	0	3	0	322.5
CEP290	ENSG00000198707	centrosomal protein 290	317	0	FALSE	FALSE	FALSE	FALSE	FALSE	FALSE	FALSE	FALSE	FALSE	FALSE	FALSE	FALSE	Cytoplasm	0	1	2	0	0	1	0	0	321
TOP2B	ENSG00000077097	DNA topoisomerase II beta	289	5	TRUE	FALSE	FALSE	TRUE	FALSE	FALSE	FALSE	FALSE	FALSE	FALSE	FALSE	FALSE	Nucleus	0	9	3	4	0	0	0	4	318
PRKCE	ENSG00000171132	protein kinase C epsilon	300	5	TRUE	FALSE	FALSE	TRUE	FALSE	FALSE	FALSE	FALSE	FALSE	FALSE	TRUE	FALSE	Cytoplasm	1	5	2	1	0	3	0	1	316
TSLP	ENSG00000145777	thymic stromal lymphopoietin	308	2	FALSE	FALSE	FALSE	FALSE	FALSE	TRUE	FALSE	FALSE	FALSE	FALSE	FALSE	FALSE	Secreted	0	2	1	0	1	1	0	0	315.5
TNFRSF10A	ENSG00000104689	TNF receptor superfamily member 10a	307	2	FALSE	FALSE	FALSE	FALSE	FALSE	TRUE	FALSE	FALSE	FALSE	FALSE	TRUE	FALSE	Cell membrane	0	2	1	0	0	2	0	0	314
FCER2	ENSG00000104921	Fc epsilon receptor II	308	2	FALSE	FALSE	FALSE	TRUE	FALSE	TRUE	FALSE	FALSE	FALSE	FALSE	FALSE	FALSE	Cell membrane	0	1	1	0	0	1	0	0	313
LTBR	ENSG00000111321	lymphotoxin beta receptor	306	1	FALSE	FALSE	FALSE	FALSE	FALSE	FALSE	FALSE	FALSE	FALSE	FALSE	FALSE	FALSE	Membrane	0	1	2	0	0	0	1	0	310.5
ROCK2	ENSG00000134318	Rho associated coiled-coil containing protein kinase 2	276	4	TRUE	FALSE	FALSE	TRUE	FALSE	FALSE	FALSE	FALSE	FALSE	FALSE	FALSE	FALSE	Cytoplasm	1	13	1	4	1	5	0	4	310.5
FCGR1A	ENSG00000150337	Fc gamma receptor Ia	300	3	FALSE	FALSE	FALSE	FALSE	FALSE	TRUE	FALSE	FALSE	FALSE	FALSE	FALSE	FALSE	Cell membrane	0	1	2	0	0	1	0	0	307
MAOA	ENSG00000189221	monoamine oxidase A	292	4	TRUE	FALSE	FALSE	TRUE	FALSE	FALSE	FALSE	FALSE	FALSE	FALSE	FALSE	FALSE	Mitochondrion outer membrane	16	12	1	9	0	0	0	9	304
CHEK1	ENSG00000149554	checkpoint kinase 1	269	5	FALSE	TRUE	FALSE	TRUE	FALSE	FALSE	FALSE	FALSE	FALSE	FALSE	FALSE	FALSE	Nucleus	0	10	8	0	0	5	1	0	297.5
MAPK9	ENSG00000050748	mitogen-activated protein kinase 9	287	5	FALSE	TRUE	FALSE	TRUE	FALSE	FALSE	FALSE	FALSE	FALSE	FALSE	FALSE	FALSE	Cytoplasm	1	3	1	0	0	3	0	0	297
ATR	ENSG00000175054	ATR serine/threonine kinase	277	3	FALSE	TRUE	FALSE	TRUE	FALSE	FALSE	FALSE	FALSE	FALSE	FALSE	FALSE	FALSE	Nucleus	0	4	9	0	0	2	0	0	295
CDK5	ENSG00000164885	cyclin dependent kinase 5	274	6	FALSE	TRUE	FALSE	TRUE	FALSE	FALSE	FALSE	FALSE	FALSE	FALSE	FALSE	FALSE	[Isoform 1]: Cytoplasm	0	7	2	0	1	3	2	0	294.5
EEF1A2	ENSG00000101210	eukaryotic translation elongation factor 1 alpha 2	286	1	FALSE	TRUE	FALSE	FALSE	FALSE	FALSE	FALSE	FALSE	FALSE	FALSE	FALSE	FALSE	Nucleus	0	1	2	0	1	0	0	0	291.5
TNFRSF17	ENSG00000048462	TNF receptor superfamily member 17	279	1	FALSE	FALSE	FALSE	FALSE	TRUE	FALSE	FALSE	FALSE	FALSE	FALSE	TRUE	FALSE	Cell membrane	0	4	1	1	1	2	0	1	291.5
AURKB	ENSG00000178999	aurora kinase B	251	4	FALSE	TRUE	FALSE	TRUE	FALSE	FALSE	FALSE	FALSE	FALSE	FALSE	FALSE	FALSE	Nucleus	1	18	9	0	2	6	1	0	289.5
CDK9	ENSG00000136807	cyclin dependent kinase 9	265	5	FALSE	TRUE	FALSE	TRUE	FALSE	FALSE	FALSE	FALSE	FALSE	FALSE	FALSE	FALSE	Nucleus	0	10	1	0	2	3	0	0	287
APEX1	ENSG00000100823	apurinic/apyrimidinic endodeoxyribonuclease 1	276	5	FALSE	TRUE	FALSE	TRUE	FALSE	FALSE	FALSE	FALSE	FALSE	FALSE	FALSE	FALSE	Nucleus	0	1	1	0	0	1	0	0	284
PIM1	ENSG00000137193	Pim-1 proto-oncogene, serine/threonine kinase	274	5	FALSE	FALSE	TRUE	TRUE	FALSE	FALSE	FALSE	FALSE	FALSE	FALSE	FALSE	FALSE	[Isoform 1]: Cytoplasm	1	3	1	0	0	0	3	0	282.5
TNFRSF13C	ENSG00000159958	TNF receptor superfamily member 13C	276	1	FALSE	FALSE	FALSE	FALSE	FALSE	TRUE	FALSE	FALSE	FALSE	FALSE	FALSE	FALSE	Membrane	0	1	1	0	0	1	0	0	280
E2F3	ENSG00000112242	E2F transcription factor 3	271	0	FALSE	FALSE	FALSE	FALSE	FALSE	FALSE	FALSE	FALSE	FALSE	FALSE	TRUE	FALSE	Nucleus	0	1	3	0	1	0	0	0	276.5
RPSA	ENSG00000168028	ribosomal protein SA	253	4	TRUE	FALSE	FALSE	FALSE	FALSE	FALSE	FALSE	FALSE	FALSE	FALSE	TRUE	FALSE	Cell membrane	0	3	11	1	0	2	0	1	276
TUBA1A	ENSG00000167552	tubulin alpha 1a	239	5	TRUE	FALSE	FALSE	TRUE	FALSE	TRUE	FALSE	FALSE	FALSE	FALSE	TRUE	FALSE	Cytoplasm	0	19	2	1	4	1	0	1	275
HDAC8	ENSG00000147099	histone deacetylase 8	241	5	TRUE	FALSE	FALSE	TRUE	FALSE	FALSE	FALSE	FALSE	FALSE	TRUE	FALSE	FALSE	Nucleus	0	10	2	4	3	0	0	4	274.5
CD3E	ENSG00000198851	CD3 epsilon subunit of T-cell receptor complex	229	3	FALSE	FALSE	FALSE	FALSE	TRUE	FALSE	FALSE	FALSE	FALSE	FALSE	FALSE	FALSE	Cell membrane	0	18	2	3	6	3	0	3	273
RRM2B	ENSG00000048392	ribonucleotide reductase regulatory TP53 inducible subunit M2B	257	3	FALSE	TRUE	FALSE	TRUE	FALSE	FALSE	FALSE	FALSE	FALSE	FALSE	FALSE	FALSE	Cytoplasm	0	3	1	0	2	1	0	0	268
RRM2	ENSG00000171848	ribonucleotide reductase regulatory subunit M2	254	2	TRUE	FALSE	FALSE	TRUE	FALSE	FALSE	FALSE	FALSE	FALSE	FALSE	FALSE	FALSE	Cytoplasm	0	5	2	1	0	0	0	1	266
HDAC7	ENSG00000061273	histone deacetylase 7	231	5	TRUE	FALSE	FALSE	TRUE	FALSE	FALSE	FALSE	FALSE	FALSE	TRUE	FALSE	FALSE	Nucleus	0	9	3	4	3	0	0	4	264.5
RPL17	ENSG00000265681	ribosomal protein L17	239	4	TRUE	FALSE	FALSE	FALSE	FALSE	FALSE	FALSE	FALSE	FALSE	FALSE	TRUE	FALSE	Cytoplasm	0	3	11	1	0	2	0	1	262
CSF2RA	ENSG00000198223	colony stimulating factor 2 receptor subunit alpha	252	2	FALSE	FALSE	FALSE	FALSE	FALSE	TRUE	FALSE	FALSE	FALSE	TRUE	FALSE	FALSE	Cell membrane	0	2	1	1	0	0	0	1	260
TNFSF4	ENSG00000117586	TNF superfamily member 4	248	1	FALSE	FALSE	FALSE	FALSE	FALSE	TRUE	FALSE	FALSE	FALSE	FALSE	TRUE	FALSE	Membrane	0	2	1	0	0	2	0	0	254
TNFRSF4	ENSG00000186827	TNF receptor superfamily member 4	239	1	FALSE	FALSE	FALSE	FALSE	FALSE	TRUE	FALSE	FALSE	FALSE	FALSE	TRUE	FALSE	Membrane	0	5	1	0	0	5	0	0	251
NDUFA4	ENSG00000189043	NDUFA4 mitochondrial complex associated	235	3	TRUE	FALSE	FALSE	TRUE	FALSE	FALSE	FALSE	FALSE	FALSE	FALSE	FALSE	FALSE	Mitochondrion inner membrane	0	3	1	2	0	0	0	2	248
RPS6	ENSG00000137154	ribosomal protein S6	223	4	TRUE	FALSE	FALSE	FALSE	FALSE	FALSE	FALSE	FALSE	FALSE	FALSE	TRUE	FALSE	Cytosol	0	3	12	1	0	2	0	1	247
EGLN1	ENSG00000135766	egl-9 family hypoxia inducible factor 1	230	4	FALSE	TRUE	FALSE	TRUE	FALSE	FALSE	FALSE	FALSE	FALSE	FALSE	FALSE	FALSE	Cytoplasm	0	4	1	0	4	0	0	0	245
CA1	ENSG00000133742	carbonic anhydrase 1	212	5	TRUE	FALSE	FALSE	TRUE	FALSE	FALSE	FALSE	FALSE	FALSE	FALSE	FALSE	FALSE	Cytoplasm	0	7	1	6	0	0	0	6	243
RBX1	ENSG00000100387	ring-box 1	221	3	TRUE	FALSE	FALSE	FALSE	FALSE	FALSE	FALSE	FALSE	FALSE	FALSE	FALSE	FALSE	Cytoplasm	0	4	5	3	0	0	0	3	242
E2F1	ENSG00000101412	E2F transcription factor 1	234	1	FALSE	FALSE	FALSE	FALSE	FALSE	FALSE	FALSE	FALSE	FALSE	FALSE	TRUE	FALSE	Nucleus	1	1	6	0	1	0	0	0	241.5
IL10RB	ENSG00000243646	interleukin 10 receptor subunit beta	238	0	FALSE	FALSE	FALSE	FALSE	FALSE	FALSE	FALSE	FALSE	FALSE	FALSE	TRUE	FALSE	Membrane	0	1	1	0	1	0	0	0	241.5
HSPA8	ENSG00000109971	heat shock protein family A (Hsp70) member 8	230	2	FALSE	FALSE	FALSE	FALSE	FALSE	FALSE	FALSE	FALSE	FALSE	FALSE	TRUE	FALSE	Cytoplasm	0	2	4	0	2	0	0	0	241
TNFSF14	ENSG00000125735	TNF superfamily member 14	233	0	FALSE	FALSE	FALSE	FALSE	FALSE	FALSE	FALSE	FALSE	FALSE	FALSE	TRUE	FALSE	[Tumor necrosis factor ligand superfamily member 14, membrane form]: Cell membrane	0	1	1	0	0	1	0	0	236
IL13RA2	ENSG00000123496	interleukin 13 receptor subunit alpha 2	232	0	FALSE	FALSE	FALSE	FALSE	FALSE	FALSE	FALSE	FALSE	FALSE	FALSE	TRUE	FALSE	Membrane	0	1	1	0	1	0	0	0	235.5
OPRD1	ENSG00000116329	opioid receptor delta 1	228	5	TRUE	FALSE	FALSE	TRUE	FALSE	FALSE	FALSE	FALSE	FALSE	FALSE	FALSE	FALSE	Cell membrane	26	26	1	9	0	0	0	9	235
CD70	ENSG00000125726	CD70 molecule	226	1	FALSE	FALSE	FALSE	FALSE	FALSE	TRUE	FALSE	FALSE	FALSE	FALSE	FALSE	FALSE	Membrane	0	3	1	0	0	1	2	0	233
PSMB10	ENSG00000205220	proteasome 20S subunit beta 10	213	4	FALSE	TRUE	FALSE	TRUE	FALSE	FALSE	FALSE	FALSE	FALSE	FALSE	FALSE	FALSE	Cytoplasm	0	2	11	0	1	0	1	0	232
PIK3R2	ENSG00000105647	phosphoinositide-3-kinase regulatory subunit 2	189	2	FALSE	TRUE	FALSE	FALSE	FALSE	FALSE	FALSE	FALSE	FALSE	FALSE	FALSE	FALSE	No data	0	24	2	0	3	8	0	0	229.5
TUBA4A	ENSG00000127824	tubulin alpha 4a	192	4	TRUE	FALSE	FALSE	TRUE	FALSE	TRUE	FALSE	FALSE	FALSE	FALSE	TRUE	FALSE	Cytoplasm	0	19	2	1	4	1	0	1	227
IL5RA	ENSG00000091181	interleukin 5 receptor subunit alpha	220	0	FALSE	FALSE	FALSE	FALSE	FALSE	FALSE	FALSE	FALSE	FALSE	FALSE	FALSE	FALSE	Membrane	0	1	1	1	0	0	0	1	225
IL13RA1	ENSG00000131724	interleukin 13 receptor subunit alpha 1	220	0	FALSE	FALSE	FALSE	FALSE	FALSE	FALSE	FALSE	FALSE	FALSE	FALSE	TRUE	FALSE	Membrane	0	1	1	0	1	0	0	0	223.5
BIRC2	ENSG00000110330	baculoviral IAP repeat containing 2	214	5	FALSE	TRUE	FALSE	TRUE	FALSE	FALSE	FALSE	FALSE	FALSE	FALSE	FALSE	FALSE	Cytoplasm	0	1	1	0	0	1	0	0	222
CSF2RB	ENSG00000100368	colony stimulating factor 2 receptor subunit beta	215	2	FALSE	FALSE	FALSE	FALSE	FALSE	TRUE	FALSE	FALSE	FALSE	FALSE	FALSE	FALSE	Membrane	0	1	1	0	0	1	0	0	220
DDB1	ENSG00000167986	damage specific DNA binding protein 1	202	3	TRUE	FALSE	FALSE	FALSE	FALSE	FALSE	FALSE	FALSE	FALSE	FALSE	FALSE	FALSE	Cytoplasm	0	4	1	3	0	0	0	3	219
PTK6	ENSG00000101213	protein tyrosine kinase 6	207	4	TRUE	FALSE	FALSE	TRUE	FALSE	FALSE	FALSE	FALSE	FALSE	FALSE	FALSE	FALSE	Cytoplasm	0	1	3	1	0	0	0	1	218
IL31RA	ENSG00000164509	interleukin 31 receptor A	209	2	FALSE	FALSE	FALSE	FALSE	FALSE	TRUE	FALSE	FALSE	FALSE	FALSE	FALSE	FALSE	Cell membrane	0	1	1	0	1	0	0	0	214.5
PSMB5	ENSG00000100804	proteasome 20S subunit beta 5	180	4	TRUE	FALSE	FALSE	TRUE	FALSE	FALSE	FALSE	FALSE	FALSE	TRUE	FALSE	FALSE	Cytoplasm	0	6	11	4	0	0	0	4	213
P4HB	ENSG00000185624	prolyl 4-hydroxylase subunit beta	201	6	FALSE	TRUE	FALSE	TRUE	FALSE	FALSE	FALSE	FALSE	FALSE	FALSE	FALSE	FALSE	Endoplasmic reticulum	0	2	1	0	0	2	0	0	212
IFNAR2	ENSG00000159110	interferon alpha and beta receptor subunit 2	175	2	FALSE	FALSE	FALSE	FALSE	FALSE	FALSE	FALSE	FALSE	FALSE	TRUE	FALSE	FALSE	[Isoform 1]: Cell membrane	0	11	2	7	0	0	0	7	211
RPL22	ENSG00000116251	ribosomal protein L22	186	4	TRUE	FALSE	FALSE	FALSE	FALSE	FALSE	FALSE	FALSE	FALSE	FALSE	TRUE	FALSE	Cytoplasm	0	3	11	1	0	2	0	1	209
PIK3R3	ENSG00000117461	phosphoinositide-3-kinase regulatory subunit 3	166	2	FALSE	TRUE	FALSE	FALSE	FALSE	FALSE	FALSE	FALSE	FALSE	FALSE	FALSE	FALSE	Vesicles	0	24	2	0	3	6	0	0	204.5
PARP2	ENSG00000129484	poly(ADP-ribose) polymerase 2	165	5	TRUE	FALSE	FALSE	TRUE	FALSE	FALSE	FALSE	FALSE	FALSE	FALSE	FALSE	FALSE	Nucleus	0	10	1	7	0	0	0	7	202
IL15RA	ENSG00000134470	interleukin 15 receptor subunit alpha	197	1	FALSE	FALSE	FALSE	FALSE	FALSE	FALSE	FALSE	FALSE	FALSE	FALSE	TRUE	FALSE	Membrane	0	1	1	0	0	1	0	0	201
TXNRD1	ENSG00000198431	thioredoxin reductase 1	181	5	TRUE	FALSE	FALSE	TRUE	FALSE	FALSE	FALSE	FALSE	FALSE	FALSE	FALSE	FALSE	[Isoform 1]: Cytoplasm	0	3	1	2	1	0	0	2	197.5
RPL24	ENSG00000114391	ribosomal protein L24	173	4	TRUE	FALSE	FALSE	FALSE	FALSE	FALSE	FALSE	FALSE	FALSE	FALSE	TRUE	FALSE	Cytoplasm	0	3	11	1	0	2	0	1	196
PLK4	ENSG00000142731	polo like kinase 4	184	4	FALSE	TRUE	FALSE	TRUE	FALSE	FALSE	FALSE	FALSE	FALSE	FALSE	FALSE	FALSE	Cytoplasm	0	3	2	0	0	1	1	0	194.5
RPL5	ENSG00000122406	ribosomal protein L5	171	4	TRUE	FALSE	FALSE	FALSE	FALSE	FALSE	FALSE	FALSE	FALSE	FALSE	TRUE	FALSE	Cytoplasm	0	3	11	1	0	2	0	1	194
IRAK4	ENSG00000198001	interleukin 1 receptor associated kinase 4	186	5	FALSE	TRUE	FALSE	TRUE	FALSE	FALSE	FALSE	FALSE	TRUE	FALSE	FALSE	FALSE	Cytoplasm	1	1	1	0	0	1	0	0	192
EGLN3	ENSG00000129521	egl-9 family hypoxia inducible factor 3	179	3	FALSE	TRUE	FALSE	TRUE	FALSE	FALSE	FALSE	FALSE	FALSE	FALSE	FALSE	FALSE	Nucleus	0	3	1	0	3	0	0	0	190.5
E2F4	ENSG00000205250	E2F transcription factor 4	180	0	FALSE	FALSE	FALSE	FALSE	FALSE	FALSE	FALSE	FALSE	FALSE	FALSE	TRUE	FALSE	Nucleus	0	1	4	0	1	0	0	0	186.5
CD3G	ENSG00000160654	CD3 gamma subunit of T-cell receptor complex	155	3	FALSE	FALSE	FALSE	FALSE	TRUE	FALSE	FALSE	FALSE	FALSE	FALSE	FALSE	FALSE	Cell membrane	0	11	2	2	3	4	0	2	185.5
TNFRSF18	ENSG00000186891	TNF receptor superfamily member 18	180	1	FALSE	FALSE	FALSE	FALSE	FALSE	TRUE	FALSE	FALSE	FALSE	FALSE	FALSE	FALSE	[Isoform 1]: Cell membrane	0	2	1	0	0	1	1	0	185.5
IL3RA	ENSG00000185291	interleukin 3 receptor subunit alpha	171	2	FALSE	FALSE	FALSE	FALSE	FALSE	TRUE	FALSE	FALSE	FALSE	TRUE	FALSE	FALSE	Membrane	0	4	1	1	0	2	1	1	183.5
MAPK10	ENSG00000109339	mitogen-activated protein kinase 10	165	5	FALSE	TRUE	FALSE	TRUE	FALSE	FALSE	FALSE	FALSE	FALSE	FALSE	TRUE	FALSE	Cytoplasm	0	5	1	0	2	3	0	0	182
YES1	ENSG00000176105	YES proto-oncogene 1, Src family tyrosine kinase	169	3	TRUE	FALSE	FALSE	TRUE	FALSE	FALSE	FALSE	FALSE	FALSE	FALSE	FALSE	FALSE	Cell membrane	0	6	1	1	0	0	0	1	182
GRB2	ENSG00000177885	growth factor receptor bound protein 2	173	3	FALSE	FALSE	FALSE	FALSE	FALSE	FALSE	FALSE	FALSE	FALSE	FALSE	FALSE	FALSE	Nucleus	0	1	3	0	0	1	0	0	181
PTAFR	ENSG00000169403	platelet activating factor receptor	194	4	FALSE	TRUE	FALSE	TRUE	FALSE	FALSE	FALSE	FALSE	FALSE	FALSE	FALSE	FALSE	Cell membrane	12	1	2	0	1	0	0	0	178.5
PDPK1	ENSG00000140992	3-phosphoinositide dependent protein kinase 1	159	5	FALSE	TRUE	FALSE	TRUE	FALSE	FALSE	FALSE	FALSE	FALSE	FALSE	FALSE	FALSE	Cytoplasm	1	2	4	0	0	1	1	0	169.5
IL1RL2	ENSG00000115598	interleukin 1 receptor like 2	162	1	FALSE	FALSE	FALSE	FALSE	FALSE	TRUE	FALSE	FALSE	FALSE	FALSE	FALSE	FALSE	Membrane	0	2	1	0	1	1	0	0	168.5
CD3D	ENSG00000167286	CD3 delta subunit of T-cell receptor complex	140	1	FALSE	FALSE	FALSE	FALSE	TRUE	FALSE	FALSE	FALSE	FALSE	FALSE	FALSE	FALSE	Cell membrane	0	11	2	2	3	3	0	2	167.5
CASP6	ENSG00000138794	caspase 6	158	5	FALSE	TRUE	FALSE	TRUE	FALSE	FALSE	FALSE	FALSE	FALSE	FALSE	FALSE	FALSE	Cytoplasm	0	1	1	0	0	1	0	0	166
RPS19	ENSG00000105372	ribosomal protein S19	142	4	TRUE	FALSE	FALSE	FALSE	FALSE	FALSE	FALSE	FALSE	FALSE	FALSE	TRUE	FALSE	Nucleus	0	3	11	1	0	2	0	1	165
NR1H2	ENSG00000131408	nuclear receptor subfamily 1 group H member 2	149	5	FALSE	FALSE	TRUE	TRUE	FALSE	FALSE	FALSE	FALSE	FALSE	FALSE	FALSE	FALSE	Nucleus	1	4	2	0	0	0	4	0	160
CASP2	ENSG00000106144	caspase 2	154	5	FALSE	TRUE	FALSE	TRUE	FALSE	FALSE	FALSE	FALSE	FALSE	FALSE	FALSE	FALSE	Nucleoplasm	1	1	1	0	0	1	0	0	160
MAPK11	ENSG00000185386	mitogen-activated protein kinase 11	143	5	TRUE	FALSE	FALSE	TRUE	FALSE	FALSE	FALSE	FALSE	FALSE	FALSE	FALSE	FALSE	Cytoplasm	1	2	3	1	1	0	0	1	155.5
RPS26	ENSG00000197728	ribosomal protein S26	132	4	TRUE	FALSE	FALSE	FALSE	FALSE	FALSE	FALSE	FALSE	FALSE	FALSE	TRUE	FALSE	Cytoplasm	0	3	11	1	0	2	0	1	155
RPS20	ENSG00000008988	ribosomal protein S20	129	4	TRUE	FALSE	FALSE	FALSE	FALSE	FALSE	FALSE	FALSE	FALSE	FALSE	TRUE	FALSE	Cytoplasm	0	3	11	1	0	2	0	1	152
MAPKAPK2	ENSG00000162889	MAPK activated protein kinase 2	146	5	FALSE	FALSE	TRUE	TRUE	FALSE	FALSE	FALSE	FALSE	FALSE	FALSE	FALSE	FALSE	Cytoplasm	1	1	1	0	0	0	1	0	151.5
PSMA6	ENSG00000100902	proteasome 20S subunit alpha 6	131	4	FALSE	TRUE	FALSE	TRUE	FALSE	FALSE	FALSE	FALSE	FALSE	FALSE	FALSE	FALSE	Cytoplasm	0	2	11	0	1	0	1	0	150
IFNA17	ENSG00000234829	interferon alpha 17	143	1	FALSE	FALSE	FALSE	FALSE	FALSE	TRUE	FALSE	FALSE	FALSE	FALSE	FALSE	FALSE	Secreted	0	2	2	0	0	2	0	0	150
IL20	ENSG00000162891	interleukin 20	142	1	FALSE	FALSE	FALSE	FALSE	FALSE	TRUE	FALSE	FALSE	FALSE	FALSE	FALSE	FALSE	Secreted	0	1	1	0	0	1	0	0	146
PPP2CA	ENSG00000113575	protein phosphatase 2 catalytic subunit alpha	129	3	FALSE	TRUE	FALSE	FALSE	FALSE	FALSE	FALSE	FALSE	FALSE	FALSE	FALSE	FALSE	Cytoplasm	1	1	11	0	0	1	0	0	143
CDC7	ENSG00000097046	cell division cycle 7	120	4	FALSE	TRUE	FALSE	TRUE	FALSE	FALSE	FALSE	FALSE	FALSE	FALSE	FALSE	FALSE	Nucleus	0	4	8	0	0	2	1	0	138.5
PDK1	ENSG00000152256	pyruvate dehydrogenase kinase 1	120	5	TRUE	FALSE	FALSE	TRUE	FALSE	FALSE	FALSE	FALSE	FALSE	FALSE	FALSE	FALSE	Mitochondrion matrix	0	1	1	1	0	0	0	1	130
RPL10	ENSG00000147403	ribosomal protein L10	105	4	TRUE	FALSE	FALSE	FALSE	FALSE	FALSE	FALSE	FALSE	FALSE	FALSE	TRUE	FALSE	Cytosol	0	3	11	1	0	2	0	1	128
HLA-DRB5	ENSG00000198502	major histocompatibility complex, class II, DR beta 5	120	3	FALSE	FALSE	FALSE	FALSE	FALSE	TRUE	FALSE	FALSE	FALSE	FALSE	FALSE	FALSE	Cell membrane	0	1	2	0	0	1	0	0	127
CSNK2A1	ENSG00000101266	casein kinase 2 alpha 1	117	5	FALSE	TRUE	FALSE	TRUE	FALSE	FALSE	FALSE	FALSE	FALSE	FALSE	FALSE	FALSE	Nucleus	1	1	3	0	0	1	0	0	125
RPL32	ENSG00000144713	ribosomal protein L32	99	4	TRUE	FALSE	FALSE	FALSE	FALSE	FALSE	FALSE	FALSE	FALSE	FALSE	TRUE	FALSE	Cytoplasm	0	3	11	1	0	2	0	1	122
PSMA1	ENSG00000129084	proteasome 20S subunit alpha 1	102	4	FALSE	TRUE	FALSE	TRUE	FALSE	FALSE	FALSE	FALSE	FALSE	FALSE	FALSE	FALSE	Cytoplasm	0	2	11	0	1	0	1	0	121
PSMA4	ENSG00000041357	proteasome 20S subunit alpha 4	101	4	FALSE	TRUE	FALSE	TRUE	FALSE	FALSE	FALSE	FALSE	FALSE	FALSE	FALSE	FALSE	Cytoplasm	0	2	11	0	1	0	1	0	120
IL1RAP	ENSG00000196083	interleukin 1 receptor accessory protein	113	1	FALSE	FALSE	FALSE	FALSE	FALSE	TRUE	FALSE	FALSE	FALSE	FALSE	FALSE	FALSE	[Isoform 1]: Cell membrane	0	2	1	0	1	1	0	0	119.5
RPS27A	ENSG00000143947	ribosomal protein S27a	78	4	TRUE	FALSE	FALSE	FALSE	FALSE	FALSE	FALSE	FALSE	FALSE	FALSE	TRUE	FALSE	[Ubiquitin]: Cytoplasm	0	3	29	1	0	2	0	1	119
PSMA8	ENSG00000154611	proteasome 20S subunit alpha 8	102	3	FALSE	TRUE	FALSE	TRUE	FALSE	FALSE	FALSE	FALSE	FALSE	FALSE	FALSE	FALSE	Nucleus	0	2	9	0	1	0	1	0	118
VAMP2	ENSG00000220205	vesicle associated membrane protein 2	112	0	FALSE	FALSE	FALSE	FALSE	FALSE	FALSE	FALSE	FALSE	FALSE	TRUE	FALSE	FALSE	Cytoplasmic vesicle	0	1	1	1	0	0	0	1	117
PSMA3	ENSG00000100567	proteasome 20S subunit alpha 3	97	4	FALSE	TRUE	FALSE	TRUE	FALSE	FALSE	FALSE	FALSE	FALSE	FALSE	FALSE	FALSE	Cytoplasm	0	2	11	0	1	0	1	0	116
RPS7	ENSG00000171863	ribosomal protein S7	92	4	TRUE	FALSE	FALSE	FALSE	FALSE	FALSE	FALSE	FALSE	FALSE	FALSE	TRUE	FALSE	Cytoplasm	0	3	11	1	0	2	0	1	115
TEC	ENSG00000135605	tec protein tyrosine kinase	107	3	FALSE	TRUE	FALSE	TRUE	FALSE	FALSE	FALSE	FALSE	FALSE	FALSE	FALSE	FALSE	Cytoplasm	0	1	1	0	1	0	0	0	113.5
IL11RA	ENSG00000137070	interleukin 11 receptor subunit alpha	106	1	FALSE	FALSE	FALSE	FALSE	FALSE	FALSE	FALSE	FALSE	FALSE	TRUE	FALSE	FALSE	[Interleukin-11 receptor subunit alpha]: Membrane	0	1	1	1	0	0	0	1	112
RPL6	ENSG00000089009	ribosomal protein L6	88	4	TRUE	FALSE	FALSE	FALSE	FALSE	FALSE	FALSE	FALSE	FALSE	FALSE	TRUE	FALSE	Cytoplasm	0	3	11	1	0	2	0	1	111
PSMA5	ENSG00000143106	proteasome 20S subunit alpha 5	91	4	FALSE	TRUE	FALSE	TRUE	FALSE	FALSE	FALSE	FALSE	FALSE	FALSE	FALSE	FALSE	Cytoplasm	0	2	11	0	1	0	1	0	110
EGLN2	ENSG00000269858	egl-9 family hypoxia inducible factor 2	97	4	FALSE	TRUE	FALSE	TRUE	FALSE	FALSE	FALSE	FALSE	FALSE	FALSE	FALSE	FALSE	Nucleus	0	3	1	0	3	0	0	0	109.5
RPLP1	ENSG00000137818	ribosomal protein lateral stalk subunit P1	85	3	TRUE	FALSE	FALSE	FALSE	FALSE	FALSE	FALSE	FALSE	FALSE	FALSE	TRUE	FALSE	Cytosol	0	3	11	1	0	2	0	1	107
PSMD3	ENSG00000108344	proteasome 26S subunit, non-ATPase 3	91	3	FALSE	FALSE	TRUE	FALSE	FALSE	FALSE	FALSE	FALSE	FALSE	FALSE	FALSE	FALSE	Nucleoplasm	0	1	11	0	0	0	1	0	106.5
E2F6	ENSG00000169016	E2F transcription factor 6	102	0	FALSE	FALSE	FALSE	FALSE	FALSE	FALSE	FALSE	FALSE	FALSE	FALSE	TRUE	FALSE	Nucleus	0	1	2	0	1	0	0	0	106.5
E2F8	ENSG00000129173	E2F transcription factor 8	102	0	FALSE	FALSE	FALSE	FALSE	FALSE	FALSE	FALSE	FALSE	FALSE	FALSE	TRUE	FALSE	Nucleus	0	1	1	0	1	0	0	0	105.5
RPL13A	ENSG00000142541	ribosomal protein L13a	82	4	TRUE	FALSE	FALSE	FALSE	FALSE	FALSE	FALSE	FALSE	FALSE	FALSE	TRUE	FALSE	Cytoplasm	0	3	11	1	0	2	0	1	105
MAPKAPK5	ENSG00000089022	MAPK activated protein kinase 5	99	3	FALSE	TRUE	FALSE	TRUE	FALSE	FALSE	FALSE	FALSE	FALSE	FALSE	FALSE	FALSE	Cytoplasm	1	1	2	0	0	1	0	0	104
RPL31	ENSG00000071082	ribosomal protein L31	80	4	TRUE	FALSE	FALSE	FALSE	FALSE	FALSE	FALSE	FALSE	FALSE	FALSE	TRUE	FALSE	Cytoplasm	0	3	11	1	0	2	0	1	103
RPLP0	ENSG00000089157	ribosomal protein lateral stalk subunit P0	76	4	TRUE	FALSE	FALSE	FALSE	FALSE	FALSE	FALSE	FALSE	FALSE	FALSE	TRUE	FALSE	Nucleus	0	3	12	1	0	2	0	1	100
PSMB7	ENSG00000136930	proteasome 20S subunit beta 7	80	4	FALSE	TRUE	FALSE	TRUE	FALSE	FALSE	FALSE	FALSE	FALSE	FALSE	FALSE	FALSE	Cytoplasm	0	2	11	0	1	0	1	0	99
E2F7	ENSG00000165891	E2F transcription factor 7	94	0	FALSE	FALSE	FALSE	FALSE	FALSE	FALSE	FALSE	FALSE	FALSE	FALSE	TRUE	FALSE	Nucleus	0	1	1	0	1	0	0	0	97.5
RPL4	ENSG00000174444	ribosomal protein L4	74	4	TRUE	FALSE	FALSE	FALSE	FALSE	FALSE	FALSE	FALSE	FALSE	FALSE	TRUE	FALSE	Cytoplasm	0	3	11	1	0	2	0	1	97
PSMC3	ENSG00000165916	proteasome 26S subunit, ATPase 3	81	3	FALSE	FALSE	TRUE	FALSE	FALSE	FALSE	FALSE	FALSE	FALSE	FALSE	FALSE	FALSE	Cytoplasm	0	1	11	0	0	0	1	0	96.5
RPS27	ENSG00000177954	ribosomal protein S27	69	5	TRUE	FALSE	FALSE	TRUE	FALSE	FALSE	FALSE	FALSE	FALSE	FALSE	TRUE	FALSE	Cytosol	0	3	14	1	0	2	0	1	96
RPL27A	ENSG00000166441	ribosomal protein L27a	72	4	TRUE	FALSE	FALSE	FALSE	FALSE	FALSE	FALSE	FALSE	FALSE	FALSE	TRUE	FALSE	Cytoplasm	0	3	11	1	0	2	0	1	95
MKNK1	ENSG00000079277	MAPK interacting serine/threonine kinase 1	86	4	FALSE	TRUE	FALSE	TRUE	FALSE	FALSE	FALSE	FALSE	FALSE	FALSE	FALSE	FALSE	[Isoform 2]: Cytoplasm	0	1	1	0	0	1	0	0	93
IFNLR1	ENSG00000185436	interferon lambda receptor 1	89	0	FALSE	FALSE	FALSE	FALSE	FALSE	FALSE	FALSE	FALSE	FALSE	FALSE	TRUE	FALSE	Membrane	0	1	1	0	1	0	0	0	92.5
PPP5C	ENSG00000011485	protein phosphatase 5 catalytic subunit	84	5	FALSE	TRUE	FALSE	TRUE	FALSE	FALSE	FALSE	FALSE	FALSE	FALSE	FALSE	FALSE	Nucleus	0	1	1	0	0	1	0	0	92
CASP10	ENSG00000003400	caspase 10	89	2	FALSE	TRUE	FALSE	FALSE	FALSE	FALSE	FALSE	FALSE	FALSE	FALSE	FALSE	FALSE	Golgi apparatus	1	1	1	0	0	1	0	0	92
PSMB11	ENSG00000222028	proteasome subunit beta 11	75	3	FALSE	TRUE	FALSE	TRUE	FALSE	FALSE	FALSE	FALSE	FALSE	FALSE	FALSE	FALSE	Cytoplasm	0	2	9	0	1	0	1	0	91
CDK13	ENSG00000065883	cyclin dependent kinase 13	76	4	FALSE	TRUE	FALSE	TRUE	FALSE	FALSE	FALSE	FALSE	FALSE	FALSE	FALSE	FALSE	Nucleus speckle	0	4	1	0	0	2	2	0	88
E2F5	ENSG00000133740	E2F transcription factor 5	82	0	FALSE	FALSE	FALSE	FALSE	FALSE	FALSE	FALSE	FALSE	FALSE	FALSE	TRUE	FALSE	Nucleus	0	1	3	0	1	0	0	0	87.5
RPS24	ENSG00000138326	ribosomal protein S24	64	4	TRUE	FALSE	FALSE	FALSE	FALSE	FALSE	FALSE	FALSE	FALSE	FALSE	TRUE	FALSE	Cytosol	0	3	11	1	0	2	0	1	87
RPS4X	ENSG00000198034	ribosomal protein S4 X-linked	63	4	TRUE	FALSE	FALSE	FALSE	FALSE	FALSE	FALSE	FALSE	FALSE	FALSE	TRUE	FALSE	Cytoplasm	0	3	11	1	0	2	0	1	86
PSMC6	ENSG00000100519	proteasome 26S subunit, ATPase 6	70	3	FALSE	FALSE	TRUE	FALSE	FALSE	FALSE	FALSE	FALSE	FALSE	FALSE	FALSE	FALSE	Cytoplasm	0	1	11	0	0	0	1	0	85.5
PSMA7	ENSG00000101182	proteasome 20S subunit alpha 7	66	4	FALSE	TRUE	FALSE	TRUE	FALSE	FALSE	FALSE	FALSE	FALSE	FALSE	FALSE	FALSE	Cytoplasm	0	2	11	0	1	0	1	0	85
RPL11	ENSG00000142676	ribosomal protein L11	61	4	TRUE	FALSE	FALSE	FALSE	FALSE	FALSE	FALSE	FALSE	FALSE	FALSE	TRUE	FALSE	Nucleus	0	3	11	1	0	2	0	1	84
RPL15	ENSG00000174748	ribosomal protein L15	61	4	TRUE	FALSE	FALSE	FALSE	FALSE	FALSE	FALSE	FALSE	FALSE	FALSE	TRUE	FALSE	Cytoplasm	0	3	11	1	0	2	0	1	84
RPL3	ENSG00000100316	ribosomal protein L3	61	4	TRUE	FALSE	FALSE	FALSE	FALSE	FALSE	FALSE	FALSE	FALSE	FALSE	TRUE	FALSE	Nucleus	0	3	11	1	0	2	0	1	84
RPS13	ENSG00000110700	ribosomal protein S13	61	4	TRUE	FALSE	FALSE	FALSE	FALSE	FALSE	FALSE	FALSE	FALSE	FALSE	TRUE	FALSE	Endoplasmic reticulum	0	3	11	1	0	2	0	1	84
RPS6KB2	ENSG00000175634	ribosomal protein S6 kinase B2	74	3	FALSE	FALSE	TRUE	TRUE	FALSE	FALSE	FALSE	FALSE	FALSE	FALSE	FALSE	FALSE	Cytoplasm	0	4	1	0	0	0	4	0	84
RPS3	ENSG00000149273	ribosomal protein S3	59	5	TRUE	FALSE	FALSE	FALSE	FALSE	FALSE	FALSE	FALSE	FALSE	FALSE	TRUE	FALSE	Cytoplasm	0	3	11	1	0	2	0	1	83
PSMD14	ENSG00000115233	proteasome 26S subunit, non-ATPase 14	66	4	FALSE	FALSE	TRUE	TRUE	FALSE	FALSE	FALSE	FALSE	FALSE	FALSE	FALSE	FALSE	Nucleoplasm	0	1	11	0	0	0	1	0	82.5
PPP2CB	ENSG00000104695	protein phosphatase 2 catalytic subunit beta	71	1	FALSE	TRUE	FALSE	FALSE	FALSE	FALSE	FALSE	FALSE	FALSE	FALSE	FALSE	FALSE	Cytoplasm	0	1	8	0	0	1	0	0	82
CSNK1E	ENSG00000213923	casein kinase 1 epsilon	65	4	TRUE	FALSE	FALSE	TRUE	FALSE	FALSE	FALSE	FALSE	FALSE	FALSE	FALSE	FALSE	Cytoplasm	0	2	5	2	0	0	0	2	82
RPL12	ENSG00000197958	ribosomal protein L12	58	4	TRUE	FALSE	FALSE	FALSE	FALSE	FALSE	FALSE	FALSE	FALSE	FALSE	TRUE	FALSE	Golgi apparatus	0	3	11	1	0	2	0	1	81
PSMC5	ENSG00000087191	proteasome 26S subunit, ATPase 5	64	3	FALSE	FALSE	TRUE	FALSE	FALSE	FALSE	FALSE	FALSE	FALSE	FALSE	FALSE	FALSE	Cytoplasm	0	1	11	0	0	0	1	0	79.5
RPL7	ENSG00000147604	ribosomal protein L7	56	4	TRUE	FALSE	FALSE	FALSE	FALSE	FALSE	FALSE	FALSE	FALSE	FALSE	TRUE	FALSE	Cytoplasm	0	3	11	1	0	2	0	1	79
RPS10	ENSG00000124614	ribosomal protein S10	56	4	TRUE	FALSE	FALSE	FALSE	FALSE	FALSE	FALSE	FALSE	FALSE	FALSE	TRUE	FALSE	Cytoplasm	0	3	11	1	0	2	0	1	79
RPS6KA2	ENSG00000071242	ribosomal protein S6 kinase A2	73	3	FALSE	FALSE	TRUE	TRUE	FALSE	FALSE	FALSE	FALSE	FALSE	FALSE	FALSE	FALSE	Nucleus	0	1	1	0	0	0	1	0	78.5
RPS29	ENSG00000213741	ribosomal protein S29	55	4	TRUE	FALSE	FALSE	FALSE	FALSE	FALSE	FALSE	FALSE	FALSE	FALSE	TRUE	FALSE	Cytoplasm	0	3	11	1	0	2	0	1	78
SEM1	ENSG00000127922	SEM1 26S proteasome subunit	62	3	FALSE	FALSE	TRUE	FALSE	FALSE	FALSE	FALSE	FALSE	FALSE	FALSE	FALSE	FALSE	Nucleus	0	1	11	0	0	0	1	0	77.5
RPL21	ENSG00000122026	ribosomal protein L21	54	4	TRUE	FALSE	FALSE	FALSE	FALSE	FALSE	FALSE	FALSE	FALSE	FALSE	TRUE	FALSE	Cytoplasm	0	3	11	1	0	2	0	1	77
RPS11	ENSG00000142534	ribosomal protein S11	54	4	TRUE	FALSE	FALSE	FALSE	FALSE	FALSE	FALSE	FALSE	FALSE	FALSE	TRUE	FALSE	Cytosol	0	3	11	1	0	2	0	1	77
RPS15A	ENSG00000134419	ribosomal protein S15a	54	4	TRUE	FALSE	FALSE	FALSE	FALSE	FALSE	FALSE	FALSE	FALSE	FALSE	TRUE	FALSE	No data	0	3	11	1	0	2	0	1	77
RPL34	ENSG00000109475	ribosomal protein L34	53	4	TRUE	FALSE	FALSE	FALSE	FALSE	FALSE	FALSE	FALSE	FALSE	FALSE	TRUE	FALSE	Cytoplasm	0	3	11	1	0	2	0	1	76
RPS23	ENSG00000186468	ribosomal protein S23	53	4	TRUE	FALSE	FALSE	FALSE	FALSE	FALSE	FALSE	FALSE	FALSE	FALSE	TRUE	FALSE	Cytoplasm	0	3	11	1	0	2	0	1	76
RPS21	ENSG00000171858	ribosomal protein S21	52	4	TRUE	FALSE	FALSE	FALSE	FALSE	FALSE	FALSE	FALSE	FALSE	FALSE	TRUE	FALSE	Cytoplasm	0	3	11	1	0	2	0	1	75
PSMD2	ENSG00000175166	proteasome 26S subunit ubiquitin receptor, non-ATPase 2	59	3	FALSE	FALSE	TRUE	FALSE	FALSE	FALSE	FALSE	FALSE	FALSE	FALSE	FALSE	FALSE	No data	0	1	11	0	0	0	1	0	74.5
RPS14	ENSG00000164587	ribosomal protein S14	51	4	TRUE	FALSE	FALSE	FALSE	FALSE	FALSE	FALSE	FALSE	FALSE	FALSE	TRUE	FALSE	Cytosol	0	3	11	1	0	2	0	1	74
PSMB1	ENSG00000008018	proteasome 20S subunit beta 1	55	4	FALSE	TRUE	FALSE	TRUE	FALSE	FALSE	FALSE	FALSE	FALSE	FALSE	FALSE	FALSE	Cytoplasm	0	2	11	0	1	0	1	0	74
NCBP1	ENSG00000136937	nuclear cap binding protein subunit 1	59	2	FALSE	TRUE	FALSE	FALSE	FALSE	FALSE	FALSE	FALSE	FALSE	FALSE	FALSE	FALSE	Nucleus	0	1	11	0	0	1	0	0	74
PSMC2	ENSG00000161057	proteasome 26S subunit, ATPase 2	58	3	FALSE	FALSE	TRUE	FALSE	FALSE	FALSE	FALSE	FALSE	FALSE	FALSE	FALSE	FALSE	Cytoplasm	0	1	11	0	0	0	1	0	73.5
RPL26	ENSG00000161970	ribosomal protein L26	50	4	TRUE	FALSE	FALSE	FALSE	FALSE	FALSE	FALSE	FALSE	FALSE	FALSE	TRUE	FALSE	Cytoplasm	0	3	11	1	0	2	0	1	73
RPL19	ENSG00000108298	ribosomal protein L19	49	4	TRUE	FALSE	FALSE	FALSE	FALSE	FALSE	FALSE	FALSE	FALSE	FALSE	TRUE	FALSE	Cytoplasm	0	3	11	1	0	2	0	1	72
RPL29	ENSG00000162244	ribosomal protein L29	49	4	TRUE	FALSE	FALSE	FALSE	FALSE	FALSE	FALSE	FALSE	FALSE	FALSE	TRUE	FALSE	Cytoplasm	0	3	11	1	0	2	0	1	72
PSMB4	ENSG00000159377	proteasome 20S subunit beta 4	53	4	FALSE	TRUE	FALSE	TRUE	FALSE	FALSE	FALSE	FALSE	FALSE	FALSE	FALSE	FALSE	Cytoplasm	0	2	11	0	1	0	1	0	72
FAU	ENSG00000149806	FAU ubiquitin like and ribosomal protein S30 fusion	50	3	TRUE	FALSE	FALSE	FALSE	FALSE	FALSE	FALSE	FALSE	FALSE	FALSE	TRUE	FALSE	[40S ribosomal protein S30]: Nucleus	0	3	11	1	0	2	0	1	72
PSMD6	ENSG00000163636	proteasome 26S subunit, non-ATPase 6	56	3	FALSE	FALSE	TRUE	FALSE	FALSE	FALSE	FALSE	FALSE	FALSE	FALSE	FALSE	FALSE	No data	0	1	11	0	0	0	1	0	71.5
RPL13	ENSG00000167526	ribosomal protein L13	48	4	TRUE	FALSE	FALSE	FALSE	FALSE	FALSE	FALSE	FALSE	FALSE	FALSE	TRUE	FALSE	Cytoplasm	0	3	11	1	0	2	0	1	71
RPL14	ENSG00000188846	ribosomal protein L14	48	4	TRUE	FALSE	FALSE	FALSE	FALSE	FALSE	FALSE	FALSE	FALSE	FALSE	TRUE	FALSE	Cytoplasm	0	3	11	1	0	2	0	1	71
RPS2	ENSG00000140988	ribosomal protein S2	46	4	TRUE	FALSE	FALSE	FALSE	FALSE	FALSE	FALSE	FALSE	FALSE	FALSE	TRUE	FALSE	Cytosol	0	3	11	1	0	2	0	1	69
PSMA2	ENSG00000106588	proteasome 20S subunit alpha 2	50	4	FALSE	TRUE	FALSE	TRUE	FALSE	FALSE	FALSE	FALSE	FALSE	FALSE	FALSE	FALSE	Cytoplasm	0	2	11	0	1	0	1	0	69
RPL37A	ENSG00000197756	ribosomal protein L37a	45	4	TRUE	FALSE	FALSE	FALSE	FALSE	FALSE	FALSE	FALSE	FALSE	FALSE	TRUE	FALSE	Cytoplasm	0	3	11	1	0	2	0	1	68
RPL9	ENSG00000163682	ribosomal protein L9	45	4	TRUE	FALSE	FALSE	FALSE	FALSE	FALSE	FALSE	FALSE	FALSE	FALSE	TRUE	FALSE	Cytoplasm	0	3	11	1	0	2	0	1	68
PSMD1	ENSG00000173692	proteasome 26S subunit, non-ATPase 1	52	3	FALSE	FALSE	TRUE	FALSE	FALSE	FALSE	FALSE	FALSE	FALSE	FALSE	FALSE	FALSE	Nucleoplasm	0	1	11	0	0	0	1	0	67.5
RPL10A	ENSG00000198755	ribosomal protein L10a	44	4	TRUE	FALSE	FALSE	FALSE	FALSE	FALSE	FALSE	FALSE	FALSE	FALSE	TRUE	FALSE	Cytoplasm	0	3	11	1	0	2	0	1	67
PSMD12	ENSG00000197170	proteasome 26S subunit, non-ATPase 12	51	3	FALSE	FALSE	TRUE	FALSE	FALSE	FALSE	FALSE	FALSE	FALSE	FALSE	FALSE	FALSE	Microtubules	0	1	11	0	0	0	1	0	66.5
RPL27	ENSG00000131469	ribosomal protein L27	43	4	TRUE	FALSE	FALSE	FALSE	FALSE	FALSE	FALSE	FALSE	FALSE	FALSE	TRUE	FALSE	Cytoplasm	0	3	11	1	0	2	0	1	66
RPS3A	ENSG00000145425	ribosomal protein S3A	43	4	TRUE	FALSE	FALSE	FALSE	FALSE	FALSE	FALSE	FALSE	FALSE	FALSE	TRUE	FALSE	Cytoplasm	0	3	11	1	0	2	0	1	66
RPS4Y1	ENSG00000129824	ribosomal protein S4 Y-linked 1	43	4	TRUE	FALSE	FALSE	FALSE	FALSE	FALSE	FALSE	FALSE	FALSE	FALSE	TRUE	FALSE	No data	0	3	11	1	0	2	0	1	66
PSMD4	ENSG00000159352	proteasome 26S subunit ubiquitin receptor, non-ATPase 4	50	3	FALSE	FALSE	TRUE	FALSE	FALSE	FALSE	FALSE	FALSE	FALSE	FALSE	FALSE	FALSE	Nucleoplasm	0	1	11	0	0	0	1	0	65.5
RPL18	ENSG00000063177	ribosomal protein L18	42	4	TRUE	FALSE	FALSE	FALSE	FALSE	FALSE	FALSE	FALSE	FALSE	FALSE	TRUE	FALSE	Cytoplasm	0	3	11	1	0	2	0	1	65
PSMD7	ENSG00000103035	proteasome 26S subunit, non-ATPase 7	49	3	FALSE	FALSE	TRUE	FALSE	FALSE	FALSE	FALSE	FALSE	FALSE	FALSE	FALSE	FALSE	Nucleoplasm	0	1	11	0	0	0	1	0	64.5
RPL23A	ENSG00000198242	ribosomal protein L23a	41	4	TRUE	FALSE	FALSE	FALSE	FALSE	FALSE	FALSE	FALSE	FALSE	FALSE	TRUE	FALSE	Cytoplasm	0	3	11	1	0	2	0	1	64
RPL35A	ENSG00000182899	ribosomal protein L35a	40	4	TRUE	FALSE	FALSE	FALSE	FALSE	FALSE	FALSE	FALSE	FALSE	FALSE	TRUE	FALSE	Cytoplasm	0	3	11	1	0	2	0	1	63
RPL41	ENSG00000229117	ribosomal protein L41	40	4	TRUE	FALSE	FALSE	FALSE	FALSE	FALSE	FALSE	FALSE	FALSE	FALSE	TRUE	FALSE	Endoplasmic reticulum	0	3	11	1	0	2	0	1	63
PSMD13	ENSG00000185627	proteasome 26S subunit, non-ATPase 13	47	3	FALSE	FALSE	TRUE	FALSE	FALSE	FALSE	FALSE	FALSE	FALSE	FALSE	FALSE	FALSE	Nuclear speckles	0	1	11	0	0	0	1	0	62.5
RPS15	ENSG00000115268	ribosomal protein S15	39	4	TRUE	FALSE	FALSE	FALSE	FALSE	FALSE	FALSE	FALSE	FALSE	FALSE	TRUE	FALSE	Cytosol	0	3	11	1	0	2	0	1	62
RPS5	ENSG00000083845	ribosomal protein S5	39	4	TRUE	FALSE	FALSE	FALSE	FALSE	FALSE	FALSE	FALSE	FALSE	FALSE	TRUE	FALSE	Cytosol	0	3	11	1	0	2	0	1	62
RPL30	ENSG00000156482	ribosomal protein L30	37	4	TRUE	FALSE	FALSE	FALSE	FALSE	FALSE	FALSE	FALSE	FALSE	FALSE	TRUE	FALSE	Cytoplasm	0	3	11	1	0	2	0	1	60
RPL23	ENSG00000125691	ribosomal protein L23	36	4	TRUE	FALSE	FALSE	FALSE	FALSE	FALSE	FALSE	FALSE	FALSE	FALSE	TRUE	FALSE	Cytoplasm	0	3	11	1	0	2	0	1	59
RPL28	ENSG00000108107	ribosomal protein L28	36	4	TRUE	FALSE	FALSE	FALSE	FALSE	FALSE	FALSE	FALSE	FALSE	FALSE	TRUE	FALSE	Cytoplasm	0	3	11	1	0	2	0	1	59
MKNK2	ENSG00000099875	MAPK interacting serine/threonine kinase 2	51	5	FALSE	TRUE	FALSE	TRUE	FALSE	FALSE	FALSE	FALSE	FALSE	FALSE	FALSE	FALSE	[Isoform 2]: Nucleus	0	1	1	0	0	1	0	0	59
RPL36	ENSG00000130255	ribosomal protein L36	35	4	TRUE	FALSE	FALSE	FALSE	FALSE	FALSE	FALSE	FALSE	FALSE	FALSE	TRUE	FALSE	Cytoplasm	0	3	11	1	0	2	0	1	58
RPS8	ENSG00000142937	ribosomal protein S8	35	4	TRUE	FALSE	FALSE	FALSE	FALSE	FALSE	FALSE	FALSE	FALSE	FALSE	TRUE	FALSE	Cytoplasm	0	3	11	1	0	2	0	1	58
PSMB2	ENSG00000126067	proteasome 20S subunit beta 2	39	4	FALSE	TRUE	FALSE	TRUE	FALSE	FALSE	FALSE	FALSE	FALSE	FALSE	FALSE	FALSE	Cytoplasm	0	2	11	0	1	0	1	0	58
PSMB6	ENSG00000142507	proteasome 20S subunit beta 6	39	4	FALSE	TRUE	FALSE	TRUE	FALSE	FALSE	FALSE	FALSE	FALSE	FALSE	FALSE	FALSE	Cytoplasm	0	2	11	0	1	0	1	0	58
PSMD11	ENSG00000108671	proteasome 26S subunit, non-ATPase 11	42	3	FALSE	FALSE	TRUE	FALSE	FALSE	FALSE	FALSE	FALSE	FALSE	FALSE	FALSE	FALSE	Nucleus	0	1	11	0	0	0	1	0	57.5
RPS16	ENSG00000105193	ribosomal protein S16	34	4	TRUE	FALSE	FALSE	FALSE	FALSE	FALSE	FALSE	FALSE	FALSE	FALSE	TRUE	FALSE	Cytosol	0	3	11	1	0	2	0	1	57
RPL35	ENSG00000136942	ribosomal protein L35	33	4	TRUE	FALSE	FALSE	FALSE	FALSE	FALSE	FALSE	FALSE	FALSE	FALSE	TRUE	FALSE	Cytoplasm	0	3	11	1	0	2	0	1	56
RPS12	ENSG00000112306	ribosomal protein S12	33	4	TRUE	FALSE	FALSE	FALSE	FALSE	FALSE	FALSE	FALSE	FALSE	FALSE	TRUE	FALSE	Cytoplasm	0	3	11	1	0	2	0	1	56
RPS28	ENSG00000233927	ribosomal protein S28	33	4	TRUE	FALSE	FALSE	FALSE	FALSE	FALSE	FALSE	FALSE	FALSE	FALSE	TRUE	FALSE	Cytoplasm	0	3	11	1	0	2	0	1	56
RPL37	ENSG00000145592	ribosomal protein L37	32	4	TRUE	FALSE	FALSE	FALSE	FALSE	FALSE	FALSE	FALSE	FALSE	FALSE	TRUE	FALSE	Cytoplasm	0	3	11	1	0	2	0	1	55
RPL39	ENSG00000198918	ribosomal protein L39	30	4	TRUE	FALSE	FALSE	FALSE	FALSE	FALSE	FALSE	FALSE	FALSE	FALSE	TRUE	FALSE	Cytoplasm	0	3	11	1	0	2	0	1	53
RPL8	ENSG00000161016	ribosomal protein L8	30	4	TRUE	FALSE	FALSE	FALSE	FALSE	FALSE	FALSE	FALSE	FALSE	FALSE	TRUE	FALSE	Cytoplasm	0	3	11	1	0	2	0	1	53
NCBP2	ENSG00000114503	nuclear cap binding protein subunit 2	37	3	FALSE	TRUE	FALSE	FALSE	FALSE	FALSE	FALSE	FALSE	FALSE	FALSE	FALSE	FALSE	Nucleus	0	1	11	0	0	1	0	0	53
POLR1A	ENSG00000068654	RNA polymerase I subunit A	46	3	FALSE	TRUE	FALSE	FALSE	FALSE	FALSE	FALSE	FALSE	FALSE	FALSE	FALSE	FALSE	Nucleus	0	1	2	0	0	1	0	0	53
UBA3	ENSG00000144744	ubiquitin like modifier activating enzyme 3	44	4	FALSE	TRUE	FALSE	FALSE	FALSE	FALSE	FALSE	FALSE	FALSE	FALSE	FALSE	FALSE	Cytosol	0	1	1	0	1	0	0	0	51.5
RPL18A	ENSG00000105640	ribosomal protein L18a	27	4	TRUE	FALSE	FALSE	FALSE	FALSE	FALSE	FALSE	FALSE	FALSE	FALSE	TRUE	FALSE	Cytoplasm	0	3	11	1	0	2	0	1	50
IFNA8	ENSG00000120242	interferon alpha 8	39	1	FALSE	FALSE	FALSE	FALSE	FALSE	TRUE	FALSE	FALSE	FALSE	FALSE	FALSE	FALSE	Secreted	0	2	2	0	0	2	0	0	46
RPL36A	ENSG00000241343	ribosomal protein L36a	20	4	TRUE	FALSE	FALSE	FALSE	FALSE	FALSE	FALSE	FALSE	FALSE	FALSE	TRUE	FALSE	Cytoplasm	0	3	11	1	0	2	0	1	43
PSMC1	ENSG00000100764	proteasome 26S subunit, ATPase 1	27	3	FALSE	FALSE	TRUE	FALSE	FALSE	FALSE	FALSE	FALSE	FALSE	FALSE	FALSE	FALSE	Cytoplasm	0	1	11	0	0	0	1	0	42.5
PSMD8	ENSG00000099341	proteasome 26S subunit, non-ATPase 8	27	3	FALSE	FALSE	TRUE	FALSE	FALSE	FALSE	FALSE	FALSE	FALSE	FALSE	FALSE	FALSE	Cytosol	0	1	11	0	0	0	1	0	42.5
IFNA4	ENSG00000236637	interferon alpha 4	28	1	FALSE	FALSE	FALSE	FALSE	FALSE	TRUE	FALSE	FALSE	FALSE	FALSE	FALSE	FALSE	Secreted	0	2	2	0	0	2	0	0	35
IFNA13	ENSG00000233816	interferon alpha 13	29	0	Unknown	Unknown	Unknown	Unknown	Unknown	Unknown	Unknown	Unknown	Unknown	Unknown	Unknown	Unknown	Secreted	0	2	2	0	0	2	0	0	35
IFNA5	ENSG00000147873	interferon alpha 5	27	1	FALSE	FALSE	FALSE	FALSE	FALSE	TRUE	FALSE	FALSE	FALSE	FALSE	FALSE	FALSE	Secreted	0	2	2	0	0	2	0	0	34
IFNA6	ENSG00000120235	interferon alpha 6	22	1	FALSE	FALSE	FALSE	FALSE	FALSE	TRUE	FALSE	FALSE	FALSE	FALSE	FALSE	FALSE	Secreted	0	2	2	0	0	2	0	0	29
IFNA10	ENSG00000186803	interferon alpha 10	20	1	FALSE	FALSE	FALSE	FALSE	FALSE	TRUE	FALSE	FALSE	FALSE	FALSE	FALSE	FALSE	Secreted	0	2	2	0	0	2	0	0	27
IFNA21	ENSG00000137080	interferon alpha 21	20	1	FALSE	FALSE	FALSE	FALSE	FALSE	TRUE	FALSE	FALSE	FALSE	FALSE	FALSE	FALSE	Secreted	0	2	2	0	0	2	0	0	27
IFNA14	ENSG00000228083	interferon alpha 14	17	1	FALSE	FALSE	FALSE	FALSE	FALSE	TRUE	FALSE	FALSE	FALSE	FALSE	FALSE	FALSE	Secreted	0	2	2	0	0	2	0	0	24
IFNA16	ENSG00000147885	interferon alpha 16	12	1	FALSE	FALSE	FALSE	FALSE	FALSE	TRUE	FALSE	FALSE	FALSE	FALSE	FALSE	FALSE	Secreted	0	2	2	0	0	2	0	0	19
IFNA7	ENSG00000214042	interferon alpha 7	11	1	FALSE	FALSE	FALSE	FALSE	FALSE	TRUE	FALSE	FALSE	FALSE	FALSE	FALSE	FALSE	Secreted	0	2	2	0	0	2	0	0	18
