# Supplementary material for: Pathway2Targets: an open-source pathway-based approach to repurpose therapeutic drugs and prioritize human targets
Source: PeerJ. 2023 Sep 29;11:e16088. doi: 10.7717/peerj.16088 (PMC10544355; doi:10.7717/peerj.16088)
Supplement: Supplemental Information 5 [file peerj-11-16088-s005.xlsx]

## Sheet: SuppTable3-CRC_-TreatmentsDefau
Target_Symbol	Target_ID	Target_Name	Associated_Disease_Count	Tractability_Count	sm_approved	sm_advancedClinical	sm_phase1	ab_approved	ab_advancedClinical	ab_phase1	pr_approved	pr_advancedClinical	pr_phase1	oc_approved	oc_advancedClinical	oc_phase1	Subcellular_Location	Safety_Liabilities	Number_Unique_Drugs	Drug_ID	Drug_Name	Is_FDA_Approved	Highest_Clinical_Trial_Phase	Has_Been_Withdrawn	Pathway_DB	Pathway_Name	Target_in_Pathways	num_Approved_Drugs	num_Phase3	num_Phase2	num_Phase1	num_Phase4	Weighted_Score
TP53	ENSG00000141510	tumor protein p53	2515	5	FALSE	TRUE	FALSE	TRUE	FALSE	FALSE	FALSE	FALSE	FALSE	FALSE	TRUE	FALSE	Cytoplasm	1	8	CHEMBL2219776	CENERSEN SODIUM	FALSE	2	FALSE	Reactome	SUMO E3 ligases SUMOylate target proteins	9	0	3	5	0	0	2544.5
TP53	ENSG00000141510	tumor protein p53	2515	5	FALSE	TRUE	FALSE	TRUE	FALSE	FALSE	FALSE	FALSE	FALSE	FALSE	TRUE	FALSE	Cytoplasm	1	8	CHEMBL2108280	CENERSEN	FALSE	2	FALSE	Reactome	Regulation of TP53 Activity	9	0	3	5	0	0	2544.5
TP53	ENSG00000141510	tumor protein p53	2515	5	FALSE	TRUE	FALSE	TRUE	FALSE	FALSE	FALSE	FALSE	FALSE	FALSE	TRUE	FALSE	Cytoplasm	1	8	CHEMBL2402737	IDASANUTLIN	FALSE	3	FALSE	Reactome	G2/M Checkpoints	9	0	3	5	0	0	2544.5
TP53	ENSG00000141510	tumor protein p53	2515	5	FALSE	TRUE	FALSE	TRUE	FALSE	FALSE	FALSE	FALSE	FALSE	FALSE	TRUE	FALSE	Cytoplasm	1	8	CHEMBL2402737	IDASANUTLIN	FALSE	3	FALSE	Reactome	SUMOylation	9	0	3	5	0	0	2544.5
TP53	ENSG00000141510	tumor protein p53	2515	5	FALSE	TRUE	FALSE	TRUE	FALSE	FALSE	FALSE	FALSE	FALSE	FALSE	TRUE	FALSE	Cytoplasm	1	8	CHEMBL2108585	CONTUSUGENE LADENOVEC	FALSE	2	FALSE	Reactome	G2/M Checkpoints	9	0	3	5	0	0	2544.5
TP53	ENSG00000141510	tumor protein p53	2515	5	FALSE	TRUE	FALSE	TRUE	FALSE	FALSE	FALSE	FALSE	FALSE	FALSE	TRUE	FALSE	Cytoplasm	1	8	CHEMBL2108280	CENERSEN	FALSE	2	FALSE	Reactome	SUMOylation	9	0	3	5	0	0	2544.5
TP53	ENSG00000141510	tumor protein p53	2515	5	FALSE	TRUE	FALSE	TRUE	FALSE	FALSE	FALSE	FALSE	FALSE	FALSE	TRUE	FALSE	Cytoplasm	1	8	CHEMBL3125702	AMG-232	FALSE	2	FALSE	Reactome	SUMOylation	9	0	3	5	0	0	2544.5
TP53	ENSG00000141510	tumor protein p53	2515	5	FALSE	TRUE	FALSE	TRUE	FALSE	FALSE	FALSE	FALSE	FALSE	FALSE	TRUE	FALSE	Cytoplasm	1	8	CHEMBL3186011	EPRENETAPOPT	FALSE	3	FALSE	Reactome	SUMOylation	9	0	3	5	0	0	2544.5
TP53	ENSG00000141510	tumor protein p53	2515	5	FALSE	TRUE	FALSE	TRUE	FALSE	FALSE	FALSE	FALSE	FALSE	FALSE	TRUE	FALSE	Cytoplasm	1	8	CHEMBL2108280	CENERSEN	FALSE	2	FALSE	Reactome	G2/M Checkpoints	9	0	3	5	0	0	2544.5
TP53	ENSG00000141510	tumor protein p53	2515	5	FALSE	TRUE	FALSE	TRUE	FALSE	FALSE	FALSE	FALSE	FALSE	FALSE	TRUE	FALSE	Cytoplasm	1	8	CHEMBL3186011	EPRENETAPOPT	FALSE	3	FALSE	Reactome	SUMO E3 ligases SUMOylate target proteins	9	0	3	5	0	0	2544.5
TP53	ENSG00000141510	tumor protein p53	2515	5	FALSE	TRUE	FALSE	TRUE	FALSE	FALSE	FALSE	FALSE	FALSE	FALSE	TRUE	FALSE	Cytoplasm	1	8	CHEMBL3186011	EPRENETAPOPT	FALSE	3	FALSE	Reactome	G2/M Checkpoints	9	0	3	5	0	0	2544.5
TP53	ENSG00000141510	tumor protein p53	2515	5	FALSE	TRUE	FALSE	TRUE	FALSE	FALSE	FALSE	FALSE	FALSE	FALSE	TRUE	FALSE	Cytoplasm	1	8	CHEMBL2108585	CONTUSUGENE LADENOVEC	FALSE	2	FALSE	Reactome	G2/M Checkpoints	9	0	3	5	0	0	2544.5
TP53	ENSG00000141510	tumor protein p53	2515	5	FALSE	TRUE	FALSE	TRUE	FALSE	FALSE	FALSE	FALSE	FALSE	FALSE	TRUE	FALSE	Cytoplasm	1	8	CHEMBL2402737	IDASANUTLIN	FALSE	3	FALSE	Reactome	SUMO E3 ligases SUMOylate target proteins	9	0	3	5	0	0	2544.5
TP53	ENSG00000141510	tumor protein p53	2515	5	FALSE	TRUE	FALSE	TRUE	FALSE	FALSE	FALSE	FALSE	FALSE	FALSE	TRUE	FALSE	Cytoplasm	1	8	CHEMBL3186011	EPRENETAPOPT	FALSE	3	FALSE	Reactome	Regulation of TP53 Activity	9	0	3	5	0	0	2544.5
TP53	ENSG00000141510	tumor protein p53	2515	5	FALSE	TRUE	FALSE	TRUE	FALSE	FALSE	FALSE	FALSE	FALSE	FALSE	TRUE	FALSE	Cytoplasm	1	8	CHEMBL2108280	CENERSEN	FALSE	2	FALSE	Reactome	Cytokine Signaling in Immune system	9	0	3	5	0	0	2544.5
TP53	ENSG00000141510	tumor protein p53	2515	5	FALSE	TRUE	FALSE	TRUE	FALSE	FALSE	FALSE	FALSE	FALSE	FALSE	TRUE	FALSE	Cytoplasm	1	8	CHEMBL3125702	AMG-232	FALSE	2	FALSE	Reactome	Cytokine Signaling in Immune system	9	0	3	5	0	0	2544.5
TP53	ENSG00000141510	tumor protein p53	2515	5	FALSE	TRUE	FALSE	TRUE	FALSE	FALSE	FALSE	FALSE	FALSE	FALSE	TRUE	FALSE	Cytoplasm	1	8	CHEMBL3125702	AMG-232	FALSE	2	FALSE	Reactome	Cytokine Signaling in Immune system	9	0	3	5	0	0	2544.5
TP53	ENSG00000141510	tumor protein p53	2515	5	FALSE	TRUE	FALSE	TRUE	FALSE	FALSE	FALSE	FALSE	FALSE	FALSE	TRUE	FALSE	Cytoplasm	1	8	CHEMBL3186011	EPRENETAPOPT	FALSE	3	FALSE	Reactome	Cytokine Signaling in Immune system	9	0	3	5	0	0	2544.5
TP53	ENSG00000141510	tumor protein p53	2515	5	FALSE	TRUE	FALSE	TRUE	FALSE	FALSE	FALSE	FALSE	FALSE	FALSE	TRUE	FALSE	Cytoplasm	1	8	CHEMBL3186011	EPRENETAPOPT	FALSE	3	FALSE	Reactome	G2/M Checkpoints	9	0	3	5	0	0	2544.5
TP53	ENSG00000141510	tumor protein p53	2515	5	FALSE	TRUE	FALSE	TRUE	FALSE	FALSE	FALSE	FALSE	FALSE	FALSE	TRUE	FALSE	Cytoplasm	1	8	CHEMBL2108280	CENERSEN	FALSE	2	FALSE	Reactome	DNA Repair	9	0	3	5	0	0	2544.5
TP53	ENSG00000141510	tumor protein p53	2515	5	FALSE	TRUE	FALSE	TRUE	FALSE	FALSE	FALSE	FALSE	FALSE	FALSE	TRUE	FALSE	Cytoplasm	1	8	CHEMBL2108280	CENERSEN	FALSE	2	FALSE	Reactome	SUMO E3 ligases SUMOylate target proteins	9	0	3	5	0	0	2544.5
TP53	ENSG00000141510	tumor protein p53	2515	5	FALSE	TRUE	FALSE	TRUE	FALSE	FALSE	FALSE	FALSE	FALSE	FALSE	TRUE	FALSE	Cytoplasm	1	8	CHEMBL2108585	CONTUSUGENE LADENOVEC	FALSE	2	FALSE	Reactome	G2/M DNA damage checkpoint	9	0	3	5	0	0	2544.5
TP53	ENSG00000141510	tumor protein p53	2515	5	FALSE	TRUE	FALSE	TRUE	FALSE	FALSE	FALSE	FALSE	FALSE	FALSE	TRUE	FALSE	Cytoplasm	1	8	CHEMBL4091801	APG115	FALSE	2	FALSE	Reactome	Cytokine Signaling in Immune system	9	0	3	5	0	0	2544.5
TP53	ENSG00000141510	tumor protein p53	2515	5	FALSE	TRUE	FALSE	TRUE	FALSE	FALSE	FALSE	FALSE	FALSE	FALSE	TRUE	FALSE	Cytoplasm	1	8	CHEMBL4091801	APG115	FALSE	2	FALSE	Reactome	SUMOylation	9	0	3	5	0	0	2544.5
TP53	ENSG00000141510	tumor protein p53	2515	5	FALSE	TRUE	FALSE	TRUE	FALSE	FALSE	FALSE	FALSE	FALSE	FALSE	TRUE	FALSE	Cytoplasm	1	8	CHEMBL2219776	CENERSEN SODIUM	FALSE	2	FALSE	Reactome	G2/M Checkpoints	9	0	3	5	0	0	2544.5
TP53	ENSG00000141510	tumor protein p53	2515	5	FALSE	TRUE	FALSE	TRUE	FALSE	FALSE	FALSE	FALSE	FALSE	FALSE	TRUE	FALSE	Cytoplasm	1	8	CHEMBL4297574	TEPRASIRAN	FALSE	3	FALSE	Reactome	SUMOylation	9	0	3	5	0	0	2544.5
TP53	ENSG00000141510	tumor protein p53	2515	5	FALSE	TRUE	FALSE	TRUE	FALSE	FALSE	FALSE	FALSE	FALSE	FALSE	TRUE	FALSE	Cytoplasm	1	8	CHEMBL2219776	CENERSEN SODIUM	FALSE	2	FALSE	Reactome	DNA Repair	9	0	3	5	0	0	2544.5
TP53	ENSG00000141510	tumor protein p53	2515	5	FALSE	TRUE	FALSE	TRUE	FALSE	FALSE	FALSE	FALSE	FALSE	FALSE	TRUE	FALSE	Cytoplasm	1	8	CHEMBL2219776	CENERSEN SODIUM	FALSE	2	FALSE	Reactome	Cytokine Signaling in Immune system	9	0	3	5	0	0	2544.5
TP53	ENSG00000141510	tumor protein p53	2515	5	FALSE	TRUE	FALSE	TRUE	FALSE	FALSE	FALSE	FALSE	FALSE	FALSE	TRUE	FALSE	Cytoplasm	1	8	CHEMBL2108585	CONTUSUGENE LADENOVEC	FALSE	2	FALSE	Reactome	SUMOylation	9	0	3	5	0	0	2544.5
TP53	ENSG00000141510	tumor protein p53	2515	5	FALSE	TRUE	FALSE	TRUE	FALSE	FALSE	FALSE	FALSE	FALSE	FALSE	TRUE	FALSE	Cytoplasm	1	8	CHEMBL2402737	IDASANUTLIN	FALSE	3	FALSE	Reactome	SUMOylation	9	0	3	5	0	0	2544.5
TP53	ENSG00000141510	tumor protein p53	2515	5	FALSE	TRUE	FALSE	TRUE	FALSE	FALSE	FALSE	FALSE	FALSE	FALSE	TRUE	FALSE	Cytoplasm	1	8	CHEMBL3186011	EPRENETAPOPT	FALSE	3	FALSE	Reactome	SUMO E3 ligases SUMOylate target proteins	9	0	3	5	0	0	2544.5
TP53	ENSG00000141510	tumor protein p53	2515	5	FALSE	TRUE	FALSE	TRUE	FALSE	FALSE	FALSE	FALSE	FALSE	FALSE	TRUE	FALSE	Cytoplasm	1	8	CHEMBL2108280	CENERSEN	FALSE	2	FALSE	Reactome	Cytokine Signaling in Immune system	9	0	3	5	0	0	2544.5
TP53	ENSG00000141510	tumor protein p53	2515	5	FALSE	TRUE	FALSE	TRUE	FALSE	FALSE	FALSE	FALSE	FALSE	FALSE	TRUE	FALSE	Cytoplasm	1	8	CHEMBL3125702	AMG-232	FALSE	2	FALSE	Reactome	G2/M Checkpoints	9	0	3	5	0	0	2544.5
TP53	ENSG00000141510	tumor protein p53	2515	5	FALSE	TRUE	FALSE	TRUE	FALSE	FALSE	FALSE	FALSE	FALSE	FALSE	TRUE	FALSE	Cytoplasm	1	8	CHEMBL3186011	EPRENETAPOPT	FALSE	3	FALSE	Reactome	DNA Repair	9	0	3	5	0	0	2544.5
TP53	ENSG00000141510	tumor protein p53	2515	5	FALSE	TRUE	FALSE	TRUE	FALSE	FALSE	FALSE	FALSE	FALSE	FALSE	TRUE	FALSE	Cytoplasm	1	8	CHEMBL2402737	IDASANUTLIN	FALSE	3	FALSE	Reactome	G2/M Checkpoints	9	0	3	5	0	0	2544.5
TP53	ENSG00000141510	tumor protein p53	2515	5	FALSE	TRUE	FALSE	TRUE	FALSE	FALSE	FALSE	FALSE	FALSE	FALSE	TRUE	FALSE	Cytoplasm	1	8	CHEMBL3125702	AMG-232	FALSE	2	FALSE	Reactome	Cytokine Signaling in Immune system	9	0	3	5	0	0	2544.5
TP53	ENSG00000141510	tumor protein p53	2515	5	FALSE	TRUE	FALSE	TRUE	FALSE	FALSE	FALSE	FALSE	FALSE	FALSE	TRUE	FALSE	Cytoplasm	1	8	CHEMBL2402737	IDASANUTLIN	FALSE	3	FALSE	Reactome	Cytokine Signaling in Immune system	9	0	3	5	0	0	2544.5
TP53	ENSG00000141510	tumor protein p53	2515	5	FALSE	TRUE	FALSE	TRUE	FALSE	FALSE	FALSE	FALSE	FALSE	FALSE	TRUE	FALSE	Cytoplasm	1	8	CHEMBL2402737	IDASANUTLIN	FALSE	3	FALSE	Reactome	Regulation of TP53 Activity	9	0	3	5	0	0	2544.5
TP53	ENSG00000141510	tumor protein p53	2515	5	FALSE	TRUE	FALSE	TRUE	FALSE	FALSE	FALSE	FALSE	FALSE	FALSE	TRUE	FALSE	Cytoplasm	1	8	CHEMBL3125702	AMG-232	FALSE	2	FALSE	Reactome	SUMO E3 ligases SUMOylate target proteins	9	0	3	5	0	0	2544.5
TP53	ENSG00000141510	tumor protein p53	2515	5	FALSE	TRUE	FALSE	TRUE	FALSE	FALSE	FALSE	FALSE	FALSE	FALSE	TRUE	FALSE	Cytoplasm	1	8	CHEMBL2108585	CONTUSUGENE LADENOVEC	FALSE	2	FALSE	Reactome	Regulation of TP53 Activity	9	0	3	5	0	0	2544.5
TP53	ENSG00000141510	tumor protein p53	2515	5	FALSE	TRUE	FALSE	TRUE	FALSE	FALSE	FALSE	FALSE	FALSE	FALSE	TRUE	FALSE	Cytoplasm	1	8	CHEMBL3125702	AMG-232	FALSE	2	FALSE	Reactome	Cytokine Signaling in Immune system	9	0	3	5	0	0	2544.5
TP53	ENSG00000141510	tumor protein p53	2515	5	FALSE	TRUE	FALSE	TRUE	FALSE	FALSE	FALSE	FALSE	FALSE	FALSE	TRUE	FALSE	Cytoplasm	1	8	CHEMBL2402737	IDASANUTLIN	FALSE	3	FALSE	Reactome	Cytokine Signaling in Immune system	9	0	3	5	0	0	2544.5
TP53	ENSG00000141510	tumor protein p53	2515	5	FALSE	TRUE	FALSE	TRUE	FALSE	FALSE	FALSE	FALSE	FALSE	FALSE	TRUE	FALSE	Cytoplasm	1	8	CHEMBL3125702	AMG-232	FALSE	2	FALSE	Reactome	Cytokine Signaling in Immune system	9	0	3	5	0	0	2544.5
TP53	ENSG00000141510	tumor protein p53	2515	5	FALSE	TRUE	FALSE	TRUE	FALSE	FALSE	FALSE	FALSE	FALSE	FALSE	TRUE	FALSE	Cytoplasm	1	8	CHEMBL2108280	CENERSEN	FALSE	2	FALSE	Reactome	Cytokine Signaling in Immune system	9	0	3	5	0	0	2544.5
TP53	ENSG00000141510	tumor protein p53	2515	5	FALSE	TRUE	FALSE	TRUE	FALSE	FALSE	FALSE	FALSE	FALSE	FALSE	TRUE	FALSE	Cytoplasm	1	8	CHEMBL3186011	EPRENETAPOPT	FALSE	3	FALSE	Reactome	DNA Repair	9	0	3	5	0	0	2544.5
TP53	ENSG00000141510	tumor protein p53	2515	5	FALSE	TRUE	FALSE	TRUE	FALSE	FALSE	FALSE	FALSE	FALSE	FALSE	TRUE	FALSE	Cytoplasm	1	8	CHEMBL3125702	AMG-232	FALSE	2	FALSE	Reactome	G2/M Checkpoints	9	0	3	5	0	0	2544.5
TP53	ENSG00000141510	tumor protein p53	2515	5	FALSE	TRUE	FALSE	TRUE	FALSE	FALSE	FALSE	FALSE	FALSE	FALSE	TRUE	FALSE	Cytoplasm	1	8	CHEMBL2108585	CONTUSUGENE LADENOVEC	FALSE	2	FALSE	Reactome	Cytokine Signaling in Immune system	9	0	3	5	0	0	2544.5
TP53	ENSG00000141510	tumor protein p53	2515	5	FALSE	TRUE	FALSE	TRUE	FALSE	FALSE	FALSE	FALSE	FALSE	FALSE	TRUE	FALSE	Cytoplasm	1	8	CHEMBL4091801	APG115	FALSE	2	FALSE	Reactome	G2/M Checkpoints	9	0	3	5	0	0	2544.5
TP53	ENSG00000141510	tumor protein p53	2515	5	FALSE	TRUE	FALSE	TRUE	FALSE	FALSE	FALSE	FALSE	FALSE	FALSE	TRUE	FALSE	Cytoplasm	1	8	CHEMBL3125702	AMG-232	FALSE	2	FALSE	Reactome	G2/M Checkpoints	9	0	3	5	0	0	2544.5
TP53	ENSG00000141510	tumor protein p53	2515	5	FALSE	TRUE	FALSE	TRUE	FALSE	FALSE	FALSE	FALSE	FALSE	FALSE	TRUE	FALSE	Cytoplasm	1	8	CHEMBL2108585	CONTUSUGENE LADENOVEC	FALSE	2	FALSE	Reactome	DNA Repair	9	0	3	5	0	0	2544.5
TP53	ENSG00000141510	tumor protein p53	2515	5	FALSE	TRUE	FALSE	TRUE	FALSE	FALSE	FALSE	FALSE	FALSE	FALSE	TRUE	FALSE	Cytoplasm	1	8	CHEMBL3186011	EPRENETAPOPT	FALSE	3	FALSE	Reactome	Regulation of TP53 Activity	9	0	3	5	0	0	2544.5
TP53	ENSG00000141510	tumor protein p53	2515	5	FALSE	TRUE	FALSE	TRUE	FALSE	FALSE	FALSE	FALSE	FALSE	FALSE	TRUE	FALSE	Cytoplasm	1	8	CHEMBL3125702	AMG-232	FALSE	2	FALSE	Reactome	G2/M DNA damage checkpoint	9	0	3	5	0	0	2544.5
TP53	ENSG00000141510	tumor protein p53	2515	5	FALSE	TRUE	FALSE	TRUE	FALSE	FALSE	FALSE	FALSE	FALSE	FALSE	TRUE	FALSE	Cytoplasm	1	8	CHEMBL3125702	AMG-232	FALSE	2	FALSE	Reactome	G2/M Checkpoints	9	0	3	5	0	0	2544.5
TP53	ENSG00000141510	tumor protein p53	2515	5	FALSE	TRUE	FALSE	TRUE	FALSE	FALSE	FALSE	FALSE	FALSE	FALSE	TRUE	FALSE	Cytoplasm	1	8	CHEMBL3125702	AMG-232	FALSE	2	FALSE	Reactome	G2/M Checkpoints	9	0	3	5	0	0	2544.5
TP53	ENSG00000141510	tumor protein p53	2515	5	FALSE	TRUE	FALSE	TRUE	FALSE	FALSE	FALSE	FALSE	FALSE	FALSE	TRUE	FALSE	Cytoplasm	1	8	CHEMBL2108280	CENERSEN	FALSE	2	FALSE	Reactome	DNA Repair	9	0	3	5	0	0	2544.5
TP53	ENSG00000141510	tumor protein p53	2515	5	FALSE	TRUE	FALSE	TRUE	FALSE	FALSE	FALSE	FALSE	FALSE	FALSE	TRUE	FALSE	Cytoplasm	1	8	CHEMBL2108585	CONTUSUGENE LADENOVEC	FALSE	2	FALSE	Reactome	Cytokine Signaling in Immune system	9	0	3	5	0	0	2544.5
TP53	ENSG00000141510	tumor protein p53	2515	5	FALSE	TRUE	FALSE	TRUE	FALSE	FALSE	FALSE	FALSE	FALSE	FALSE	TRUE	FALSE	Cytoplasm	1	8	CHEMBL2402737	IDASANUTLIN	FALSE	3	FALSE	Reactome	DNA Repair	9	0	3	5	0	0	2544.5
TP53	ENSG00000141510	tumor protein p53	2515	5	FALSE	TRUE	FALSE	TRUE	FALSE	FALSE	FALSE	FALSE	FALSE	FALSE	TRUE	FALSE	Cytoplasm	1	8	CHEMBL3186011	EPRENETAPOPT	FALSE	3	FALSE	Reactome	Cytokine Signaling in Immune system	9	0	3	5	0	0	2544.5
TP53	ENSG00000141510	tumor protein p53	2515	5	FALSE	TRUE	FALSE	TRUE	FALSE	FALSE	FALSE	FALSE	FALSE	FALSE	TRUE	FALSE	Cytoplasm	1	8	CHEMBL3125702	AMG-232	FALSE	2	FALSE	Reactome	Cell Cycle Checkpoints	9	0	3	5	0	0	2544.5
TP53	ENSG00000141510	tumor protein p53	2515	5	FALSE	TRUE	FALSE	TRUE	FALSE	FALSE	FALSE	FALSE	FALSE	FALSE	TRUE	FALSE	Cytoplasm	1	8	CHEMBL2108280	CENERSEN	FALSE	2	FALSE	Reactome	G2/M Checkpoints	9	0	3	5	0	0	2544.5
TP53	ENSG00000141510	tumor protein p53	2515	5	FALSE	TRUE	FALSE	TRUE	FALSE	FALSE	FALSE	FALSE	FALSE	FALSE	TRUE	FALSE	Cytoplasm	1	8	CHEMBL3125702	AMG-232	FALSE	2	FALSE	Reactome	Regulation of TP53 Activity	9	0	3	5	0	0	2544.5
TP53	ENSG00000141510	tumor protein p53	2515	5	FALSE	TRUE	FALSE	TRUE	FALSE	FALSE	FALSE	FALSE	FALSE	FALSE	TRUE	FALSE	Cytoplasm	1	8	CHEMBL2219776	CENERSEN SODIUM	FALSE	2	FALSE	Reactome	Regulation of TP53 Activity	9	0	3	5	0	0	2544.5
TP53	ENSG00000141510	tumor protein p53	2515	5	FALSE	TRUE	FALSE	TRUE	FALSE	FALSE	FALSE	FALSE	FALSE	FALSE	TRUE	FALSE	Cytoplasm	1	8	CHEMBL2402737	IDASANUTLIN	FALSE	3	FALSE	Reactome	Cell Cycle Checkpoints	9	0	3	5	0	0	2544.5
TP53	ENSG00000141510	tumor protein p53	2515	5	FALSE	TRUE	FALSE	TRUE	FALSE	FALSE	FALSE	FALSE	FALSE	FALSE	TRUE	FALSE	Cytoplasm	1	8	CHEMBL3186011	EPRENETAPOPT	FALSE	3	FALSE	Reactome	G2/M Checkpoints	9	0	3	5	0	0	2544.5
TP53	ENSG00000141510	tumor protein p53	2515	5	FALSE	TRUE	FALSE	TRUE	FALSE	FALSE	FALSE	FALSE	FALSE	FALSE	TRUE	FALSE	Cytoplasm	1	8	CHEMBL2108585	CONTUSUGENE LADENOVEC	FALSE	2	FALSE	Reactome	Cytokine Signaling in Immune system	9	0	3	5	0	0	2544.5
TP53	ENSG00000141510	tumor protein p53	2515	5	FALSE	TRUE	FALSE	TRUE	FALSE	FALSE	FALSE	FALSE	FALSE	FALSE	TRUE	FALSE	Cytoplasm	1	8	CHEMBL2219776	CENERSEN SODIUM	FALSE	2	FALSE	Reactome	G2/M DNA damage checkpoint	9	0	3	5	0	0	2544.5
TP53	ENSG00000141510	tumor protein p53	2515	5	FALSE	TRUE	FALSE	TRUE	FALSE	FALSE	FALSE	FALSE	FALSE	FALSE	TRUE	FALSE	Cytoplasm	1	8	CHEMBL2108280	CENERSEN	FALSE	2	FALSE	Reactome	SUMO E3 ligases SUMOylate target proteins	9	0	3	5	0	0	2544.5
TP53	ENSG00000141510	tumor protein p53	2515	5	FALSE	TRUE	FALSE	TRUE	FALSE	FALSE	FALSE	FALSE	FALSE	FALSE	TRUE	FALSE	Cytoplasm	1	8	CHEMBL3125702	AMG-232	FALSE	2	FALSE	Reactome	SUMO E3 ligases SUMOylate target proteins	9	0	3	5	0	0	2544.5
TP53	ENSG00000141510	tumor protein p53	2515	5	FALSE	TRUE	FALSE	TRUE	FALSE	FALSE	FALSE	FALSE	FALSE	FALSE	TRUE	FALSE	Cytoplasm	1	8	CHEMBL2108585	CONTUSUGENE LADENOVEC	FALSE	2	FALSE	Reactome	DNA Repair	9	0	3	5	0	0	2544.5
TP53	ENSG00000141510	tumor protein p53	2515	5	FALSE	TRUE	FALSE	TRUE	FALSE	FALSE	FALSE	FALSE	FALSE	FALSE	TRUE	FALSE	Cytoplasm	1	8	CHEMBL3125702	AMG-232	FALSE	2	FALSE	Reactome	G2/M Checkpoints	9	0	3	5	0	0	2544.5
TP53	ENSG00000141510	tumor protein p53	2515	5	FALSE	TRUE	FALSE	TRUE	FALSE	FALSE	FALSE	FALSE	FALSE	FALSE	TRUE	FALSE	Cytoplasm	1	8	CHEMBL3186011	EPRENETAPOPT	FALSE	3	FALSE	Reactome	Cell Cycle Checkpoints	9	0	3	5	0	0	2544.5
TP53	ENSG00000141510	tumor protein p53	2515	5	FALSE	TRUE	FALSE	TRUE	FALSE	FALSE	FALSE	FALSE	FALSE	FALSE	TRUE	FALSE	Cytoplasm	1	8	CHEMBL3186011	EPRENETAPOPT	FALSE	3	FALSE	Reactome	Regulation of TP53 Activity	9	0	3	5	0	0	2544.5
TP53	ENSG00000141510	tumor protein p53	2515	5	FALSE	TRUE	FALSE	TRUE	FALSE	FALSE	FALSE	FALSE	FALSE	FALSE	TRUE	FALSE	Cytoplasm	1	8	CHEMBL2108585	CONTUSUGENE LADENOVEC	FALSE	2	FALSE	Reactome	Cytokine Signaling in Immune system	9	0	3	5	0	0	2544.5
TP53	ENSG00000141510	tumor protein p53	2515	5	FALSE	TRUE	FALSE	TRUE	FALSE	FALSE	FALSE	FALSE	FALSE	FALSE	TRUE	FALSE	Cytoplasm	1	8	CHEMBL4297574	TEPRASIRAN	FALSE	3	FALSE	Reactome	G2/M Checkpoints	9	0	3	5	0	0	2544.5
TP53	ENSG00000141510	tumor protein p53	2515	5	FALSE	TRUE	FALSE	TRUE	FALSE	FALSE	FALSE	FALSE	FALSE	FALSE	TRUE	FALSE	Cytoplasm	1	8	CHEMBL3125702	AMG-232	FALSE	2	FALSE	Reactome	Cell Cycle Checkpoints	9	0	3	5	0	0	2544.5
TP53	ENSG00000141510	tumor protein p53	2515	5	FALSE	TRUE	FALSE	TRUE	FALSE	FALSE	FALSE	FALSE	FALSE	FALSE	TRUE	FALSE	Cytoplasm	1	8	CHEMBL2108280	CENERSEN	FALSE	2	FALSE	Reactome	G2/M Checkpoints	9	0	3	5	0	0	2544.5
TP53	ENSG00000141510	tumor protein p53	2515	5	FALSE	TRUE	FALSE	TRUE	FALSE	FALSE	FALSE	FALSE	FALSE	FALSE	TRUE	FALSE	Cytoplasm	1	8	CHEMBL3186011	EPRENETAPOPT	FALSE	3	FALSE	Reactome	Cell Cycle Checkpoints	9	0	3	5	0	0	2544.5
TP53	ENSG00000141510	tumor protein p53	2515	5	FALSE	TRUE	FALSE	TRUE	FALSE	FALSE	FALSE	FALSE	FALSE	FALSE	TRUE	FALSE	Cytoplasm	1	8	CHEMBL2108585	CONTUSUGENE LADENOVEC	FALSE	2	FALSE	Reactome	DNA Repair	9	0	3	5	0	0	2544.5
TP53	ENSG00000141510	tumor protein p53	2515	5	FALSE	TRUE	FALSE	TRUE	FALSE	FALSE	FALSE	FALSE	FALSE	FALSE	TRUE	FALSE	Cytoplasm	1	8	CHEMBL2108585	CONTUSUGENE LADENOVEC	FALSE	2	FALSE	Reactome	SUMO E3 ligases SUMOylate target proteins	9	0	3	5	0	0	2544.5
TP53	ENSG00000141510	tumor protein p53	2515	5	FALSE	TRUE	FALSE	TRUE	FALSE	FALSE	FALSE	FALSE	FALSE	FALSE	TRUE	FALSE	Cytoplasm	1	8	CHEMBL3125702	AMG-232	FALSE	2	FALSE	Reactome	Cytokine Signaling in Immune system	9	0	3	5	0	0	2544.5
TP53	ENSG00000141510	tumor protein p53	2515	5	FALSE	TRUE	FALSE	TRUE	FALSE	FALSE	FALSE	FALSE	FALSE	FALSE	TRUE	FALSE	Cytoplasm	1	8	CHEMBL2108585	CONTUSUGENE LADENOVEC	FALSE	2	FALSE	Reactome	SUMO E3 ligases SUMOylate target proteins	9	0	3	5	0	0	2544.5
TP53	ENSG00000141510	tumor protein p53	2515	5	FALSE	TRUE	FALSE	TRUE	FALSE	FALSE	FALSE	FALSE	FALSE	FALSE	TRUE	FALSE	Cytoplasm	1	8	CHEMBL3186011	EPRENETAPOPT	FALSE	3	FALSE	Reactome	Cytokine Signaling in Immune system	9	0	3	5	0	0	2544.5
TP53	ENSG00000141510	tumor protein p53	2515	5	FALSE	TRUE	FALSE	TRUE	FALSE	FALSE	FALSE	FALSE	FALSE	FALSE	TRUE	FALSE	Cytoplasm	1	8	CHEMBL3125702	AMG-232	FALSE	2	FALSE	Reactome	DNA Repair	9	0	3	5	0	0	2544.5
TP53	ENSG00000141510	tumor protein p53	2515	5	FALSE	TRUE	FALSE	TRUE	FALSE	FALSE	FALSE	FALSE	FALSE	FALSE	TRUE	FALSE	Cytoplasm	1	8	CHEMBL3125702	AMG-232	FALSE	2	FALSE	Reactome	DNA Repair	9	0	3	5	0	0	2544.5
TP53	ENSG00000141510	tumor protein p53	2515	5	FALSE	TRUE	FALSE	TRUE	FALSE	FALSE	FALSE	FALSE	FALSE	FALSE	TRUE	FALSE	Cytoplasm	1	8	CHEMBL2108280	CENERSEN	FALSE	2	FALSE	Reactome	Regulation of TP53 Activity	9	0	3	5	0	0	2544.5
TP53	ENSG00000141510	tumor protein p53	2515	5	FALSE	TRUE	FALSE	TRUE	FALSE	FALSE	FALSE	FALSE	FALSE	FALSE	TRUE	FALSE	Cytoplasm	1	8	CHEMBL3186011	EPRENETAPOPT	FALSE	3	FALSE	Reactome	SUMO E3 ligases SUMOylate target proteins	9	0	3	5	0	0	2544.5
TP53	ENSG00000141510	tumor protein p53	2515	5	FALSE	TRUE	FALSE	TRUE	FALSE	FALSE	FALSE	FALSE	FALSE	FALSE	TRUE	FALSE	Cytoplasm	1	8	CHEMBL2108280	CENERSEN	FALSE	2	FALSE	Reactome	Cell Cycle Checkpoints	9	0	3	5	0	0	2544.5
TP53	ENSG00000141510	tumor protein p53	2515	5	FALSE	TRUE	FALSE	TRUE	FALSE	FALSE	FALSE	FALSE	FALSE	FALSE	TRUE	FALSE	Cytoplasm	1	8	CHEMBL2219776	CENERSEN SODIUM	FALSE	2	FALSE	Reactome	Cell Cycle Checkpoints	9	0	3	5	0	0	2544.5
TP53	ENSG00000141510	tumor protein p53	2515	5	FALSE	TRUE	FALSE	TRUE	FALSE	FALSE	FALSE	FALSE	FALSE	FALSE	TRUE	FALSE	Cytoplasm	1	8	CHEMBL2108280	CENERSEN	FALSE	2	FALSE	Reactome	G2/M DNA damage checkpoint	9	0	3	5	0	0	2544.5
TP53	ENSG00000141510	tumor protein p53	2515	5	FALSE	TRUE	FALSE	TRUE	FALSE	FALSE	FALSE	FALSE	FALSE	FALSE	TRUE	FALSE	Cytoplasm	1	8	CHEMBL4091801	APG115	FALSE	2	FALSE	Reactome	Regulation of TP53 Activity	9	0	3	5	0	0	2544.5
TP53	ENSG00000141510	tumor protein p53	2515	5	FALSE	TRUE	FALSE	TRUE	FALSE	FALSE	FALSE	FALSE	FALSE	FALSE	TRUE	FALSE	Cytoplasm	1	8	CHEMBL2402737	IDASANUTLIN	FALSE	3	FALSE	Reactome	SUMO E3 ligases SUMOylate target proteins	9	0	3	5	0	0	2544.5
TP53	ENSG00000141510	tumor protein p53	2515	5	FALSE	TRUE	FALSE	TRUE	FALSE	FALSE	FALSE	FALSE	FALSE	FALSE	TRUE	FALSE	Cytoplasm	1	8	CHEMBL2108280	CENERSEN	FALSE	2	FALSE	Reactome	Regulation of TP53 Activity	9	0	3	5	0	0	2544.5
TP53	ENSG00000141510	tumor protein p53	2515	5	FALSE	TRUE	FALSE	TRUE	FALSE	FALSE	FALSE	FALSE	FALSE	FALSE	TRUE	FALSE	Cytoplasm	1	8	CHEMBL3125702	AMG-232	FALSE	2	FALSE	Reactome	Cytokine Signaling in Immune system	9	0	3	5	0	0	2544.5
TP53	ENSG00000141510	tumor protein p53	2515	5	FALSE	TRUE	FALSE	TRUE	FALSE	FALSE	FALSE	FALSE	FALSE	FALSE	TRUE	FALSE	Cytoplasm	1	8	CHEMBL3125702	AMG-232	FALSE	2	FALSE	Reactome	Cell Cycle Checkpoints	9	0	3	5	0	0	2544.5
TP53	ENSG00000141510	tumor protein p53	2515	5	FALSE	TRUE	FALSE	TRUE	FALSE	FALSE	FALSE	FALSE	FALSE	FALSE	TRUE	FALSE	Cytoplasm	1	8	CHEMBL3125702	AMG-232	FALSE	2	FALSE	Reactome	Regulation of TP53 Activity	9	0	3	5	0	0	2544.5
TP53	ENSG00000141510	tumor protein p53	2515	5	FALSE	TRUE	FALSE	TRUE	FALSE	FALSE	FALSE	FALSE	FALSE	FALSE	TRUE	FALSE	Cytoplasm	1	8	CHEMBL3125702	AMG-232	FALSE	2	FALSE	Reactome	SUMOylation	9	0	3	5	0	0	2544.5
TP53	ENSG00000141510	tumor protein p53	2515	5	FALSE	TRUE	FALSE	TRUE	FALSE	FALSE	FALSE	FALSE	FALSE	FALSE	TRUE	FALSE	Cytoplasm	1	8	CHEMBL3125702	AMG-232	FALSE	2	FALSE	Reactome	SUMOylation	9	0	3	5	0	0	2544.5
TP53	ENSG00000141510	tumor protein p53	2515	5	FALSE	TRUE	FALSE	TRUE	FALSE	FALSE	FALSE	FALSE	FALSE	FALSE	TRUE	FALSE	Cytoplasm	1	8	CHEMBL2402737	IDASANUTLIN	FALSE	3	FALSE	Reactome	Regulation of TP53 Activity	9	0	3	5	0	0	2544.5
TP53	ENSG00000141510	tumor protein p53	2515	5	FALSE	TRUE	FALSE	TRUE	FALSE	FALSE	FALSE	FALSE	FALSE	FALSE	TRUE	FALSE	Cytoplasm	1	8	CHEMBL3186011	EPRENETAPOPT	FALSE	3	FALSE	Reactome	DNA Repair	9	0	3	5	0	0	2544.5
TP53	ENSG00000141510	tumor protein p53	2515	5	FALSE	TRUE	FALSE	TRUE	FALSE	FALSE	FALSE	FALSE	FALSE	FALSE	TRUE	FALSE	Cytoplasm	1	8	CHEMBL4091801	APG115	FALSE	2	FALSE	Reactome	Transcriptional Regulation by TP53	9	0	3	5	0	0	2544.5
TP53	ENSG00000141510	tumor protein p53	2515	5	FALSE	TRUE	FALSE	TRUE	FALSE	FALSE	FALSE	FALSE	FALSE	FALSE	TRUE	FALSE	Cytoplasm	1	8	CHEMBL3125702	AMG-232	FALSE	2	FALSE	Reactome	Regulation of TP53 Activity	9	0	3	5	0	0	2544.5
TP53	ENSG00000141510	tumor protein p53	2515	5	FALSE	TRUE	FALSE	TRUE	FALSE	FALSE	FALSE	FALSE	FALSE	FALSE	TRUE	FALSE	Cytoplasm	1	8	CHEMBL2108585	CONTUSUGENE LADENOVEC	FALSE	2	FALSE	Reactome	G2/M Checkpoints	9	0	3	5	0	0	2544.5
TP53	ENSG00000141510	tumor protein p53	2515	5	FALSE	TRUE	FALSE	TRUE	FALSE	FALSE	FALSE	FALSE	FALSE	FALSE	TRUE	FALSE	Cytoplasm	1	8	CHEMBL3125702	AMG-232	FALSE	2	FALSE	Reactome	DNA Repair	9	0	3	5	0	0	2544.5
TP53	ENSG00000141510	tumor protein p53	2515	5	FALSE	TRUE	FALSE	TRUE	FALSE	FALSE	FALSE	FALSE	FALSE	FALSE	TRUE	FALSE	Cytoplasm	1	8	CHEMBL2108585	CONTUSUGENE LADENOVEC	FALSE	2	FALSE	Reactome	Regulation of TP53 Activity	9	0	3	5	0	0	2544.5
TP53	ENSG00000141510	tumor protein p53	2515	5	FALSE	TRUE	FALSE	TRUE	FALSE	FALSE	FALSE	FALSE	FALSE	FALSE	TRUE	FALSE	Cytoplasm	1	8	CHEMBL2402737	IDASANUTLIN	FALSE	3	FALSE	Reactome	DNA Repair	9	0	3	5	0	0	2544.5
TP53	ENSG00000141510	tumor protein p53	2515	5	FALSE	TRUE	FALSE	TRUE	FALSE	FALSE	FALSE	FALSE	FALSE	FALSE	TRUE	FALSE	Cytoplasm	1	8	CHEMBL3125702	AMG-232	FALSE	2	FALSE	Reactome	SUMO E3 ligases SUMOylate target proteins	9	0	3	5	0	0	2544.5
TP53	ENSG00000141510	tumor protein p53	2515	5	FALSE	TRUE	FALSE	TRUE	FALSE	FALSE	FALSE	FALSE	FALSE	FALSE	TRUE	FALSE	Cytoplasm	1	8	CHEMBL3125702	AMG-232	FALSE	2	FALSE	Reactome	SUMO E3 ligases SUMOylate target proteins	9	0	3	5	0	0	2544.5
TP53	ENSG00000141510	tumor protein p53	2515	5	FALSE	TRUE	FALSE	TRUE	FALSE	FALSE	FALSE	FALSE	FALSE	FALSE	TRUE	FALSE	Cytoplasm	1	8	CHEMBL4297574	TEPRASIRAN	FALSE	3	FALSE	Reactome	Cytokine Signaling in Immune system	9	0	3	5	0	0	2544.5
TP53	ENSG00000141510	tumor protein p53	2515	5	FALSE	TRUE	FALSE	TRUE	FALSE	FALSE	FALSE	FALSE	FALSE	FALSE	TRUE	FALSE	Cytoplasm	1	8	CHEMBL2108280	CENERSEN	FALSE	2	FALSE	Reactome	SUMO E3 ligases SUMOylate target proteins	9	0	3	5	0	0	2544.5
TP53	ENSG00000141510	tumor protein p53	2515	5	FALSE	TRUE	FALSE	TRUE	FALSE	FALSE	FALSE	FALSE	FALSE	FALSE	TRUE	FALSE	Cytoplasm	1	8	CHEMBL3186011	EPRENETAPOPT	FALSE	3	FALSE	Reactome	Regulation of TP53 Activity	9	0	3	5	0	0	2544.5
TP53	ENSG00000141510	tumor protein p53	2515	5	FALSE	TRUE	FALSE	TRUE	FALSE	FALSE	FALSE	FALSE	FALSE	FALSE	TRUE	FALSE	Cytoplasm	1	8	CHEMBL2402737	IDASANUTLIN	FALSE	3	FALSE	Reactome	Regulation of TP53 Activity	9	0	3	5	0	0	2544.5
TP53	ENSG00000141510	tumor protein p53	2515	5	FALSE	TRUE	FALSE	TRUE	FALSE	FALSE	FALSE	FALSE	FALSE	FALSE	TRUE	FALSE	Cytoplasm	1	8	CHEMBL3186011	EPRENETAPOPT	FALSE	3	FALSE	Reactome	SUMO E3 ligases SUMOylate target proteins	9	0	3	5	0	0	2544.5
TP53	ENSG00000141510	tumor protein p53	2515	5	FALSE	TRUE	FALSE	TRUE	FALSE	FALSE	FALSE	FALSE	FALSE	FALSE	TRUE	FALSE	Cytoplasm	1	8	CHEMBL2108585	CONTUSUGENE LADENOVEC	FALSE	2	FALSE	Reactome	SUMO E3 ligases SUMOylate target proteins	9	0	3	5	0	0	2544.5
TP53	ENSG00000141510	tumor protein p53	2515	5	FALSE	TRUE	FALSE	TRUE	FALSE	FALSE	FALSE	FALSE	FALSE	FALSE	TRUE	FALSE	Cytoplasm	1	8	CHEMBL3125702	AMG-232	FALSE	2	FALSE	Reactome	Transcriptional Regulation by TP53	9	0	3	5	0	0	2544.5
TP53	ENSG00000141510	tumor protein p53	2515	5	FALSE	TRUE	FALSE	TRUE	FALSE	FALSE	FALSE	FALSE	FALSE	FALSE	TRUE	FALSE	Cytoplasm	1	8	CHEMBL3186011	EPRENETAPOPT	FALSE	3	FALSE	Reactome	G2/M DNA damage checkpoint	9	0	3	5	0	0	2544.5
TP53	ENSG00000141510	tumor protein p53	2515	5	FALSE	TRUE	FALSE	TRUE	FALSE	FALSE	FALSE	FALSE	FALSE	FALSE	TRUE	FALSE	Cytoplasm	1	8	CHEMBL2108585	CONTUSUGENE LADENOVEC	FALSE	2	FALSE	Reactome	G2/M Checkpoints	9	0	3	5	0	0	2544.5
TP53	ENSG00000141510	tumor protein p53	2515	5	FALSE	TRUE	FALSE	TRUE	FALSE	FALSE	FALSE	FALSE	FALSE	FALSE	TRUE	FALSE	Cytoplasm	1	8	CHEMBL4297574	TEPRASIRAN	FALSE	3	FALSE	Reactome	Regulation of TP53 Activity	9	0	3	5	0	0	2544.5
TP53	ENSG00000141510	tumor protein p53	2515	5	FALSE	TRUE	FALSE	TRUE	FALSE	FALSE	FALSE	FALSE	FALSE	FALSE	TRUE	FALSE	Cytoplasm	1	8	CHEMBL3186011	EPRENETAPOPT	FALSE	3	FALSE	Reactome	Transcriptional Regulation by TP53	9	0	3	5	0	0	2544.5
TP53	ENSG00000141510	tumor protein p53	2515	5	FALSE	TRUE	FALSE	TRUE	FALSE	FALSE	FALSE	FALSE	FALSE	FALSE	TRUE	FALSE	Cytoplasm	1	8	CHEMBL3186011	EPRENETAPOPT	FALSE	3	FALSE	Reactome	G2/M DNA damage checkpoint	9	0	3	5	0	0	2544.5
TP53	ENSG00000141510	tumor protein p53	2515	5	FALSE	TRUE	FALSE	TRUE	FALSE	FALSE	FALSE	FALSE	FALSE	FALSE	TRUE	FALSE	Cytoplasm	1	8	CHEMBL3125702	AMG-232	FALSE	2	FALSE	Reactome	Transcriptional Regulation by TP53	9	0	3	5	0	0	2544.5
TP53	ENSG00000141510	tumor protein p53	2515	5	FALSE	TRUE	FALSE	TRUE	FALSE	FALSE	FALSE	FALSE	FALSE	FALSE	TRUE	FALSE	Cytoplasm	1	8	CHEMBL3125702	AMG-232	FALSE	2	FALSE	Reactome	G2/M DNA damage checkpoint	9	0	3	5	0	0	2544.5
TP53	ENSG00000141510	tumor protein p53	2515	5	FALSE	TRUE	FALSE	TRUE	FALSE	FALSE	FALSE	FALSE	FALSE	FALSE	TRUE	FALSE	Cytoplasm	1	8	CHEMBL3125702	AMG-232	FALSE	2	FALSE	Reactome	Transcriptional Regulation by TP53	9	0	3	5	0	0	2544.5
TP53	ENSG00000141510	tumor protein p53	2515	5	FALSE	TRUE	FALSE	TRUE	FALSE	FALSE	FALSE	FALSE	FALSE	FALSE	TRUE	FALSE	Cytoplasm	1	8	CHEMBL2108585	CONTUSUGENE LADENOVEC	FALSE	2	FALSE	Reactome	Transcriptional Regulation by TP53	9	0	3	5	0	0	2544.5
TP53	ENSG00000141510	tumor protein p53	2515	5	FALSE	TRUE	FALSE	TRUE	FALSE	FALSE	FALSE	FALSE	FALSE	FALSE	TRUE	FALSE	Cytoplasm	1	8	CHEMBL3186011	EPRENETAPOPT	FALSE	3	FALSE	Reactome	G2/M Checkpoints	9	0	3	5	0	0	2544.5
TP53	ENSG00000141510	tumor protein p53	2515	5	FALSE	TRUE	FALSE	TRUE	FALSE	FALSE	FALSE	FALSE	FALSE	FALSE	TRUE	FALSE	Cytoplasm	1	8	CHEMBL2402737	IDASANUTLIN	FALSE	3	FALSE	Reactome	SUMO E3 ligases SUMOylate target proteins	9	0	3	5	0	0	2544.5
TP53	ENSG00000141510	tumor protein p53	2515	5	FALSE	TRUE	FALSE	TRUE	FALSE	FALSE	FALSE	FALSE	FALSE	FALSE	TRUE	FALSE	Cytoplasm	1	8	CHEMBL2108585	CONTUSUGENE LADENOVEC	FALSE	2	FALSE	Reactome	Transcriptional Regulation by TP53	9	0	3	5	0	0	2544.5
TP53	ENSG00000141510	tumor protein p53	2515	5	FALSE	TRUE	FALSE	TRUE	FALSE	FALSE	FALSE	FALSE	FALSE	FALSE	TRUE	FALSE	Cytoplasm	1	8	CHEMBL3125702	AMG-232	FALSE	2	FALSE	Reactome	SUMOylation	9	0	3	5	0	0	2544.5
TP53	ENSG00000141510	tumor protein p53	2515	5	FALSE	TRUE	FALSE	TRUE	FALSE	FALSE	FALSE	FALSE	FALSE	FALSE	TRUE	FALSE	Cytoplasm	1	8	CHEMBL2402737	IDASANUTLIN	FALSE	3	FALSE	Reactome	Transcriptional Regulation by TP53	9	0	3	5	0	0	2544.5
TP53	ENSG00000141510	tumor protein p53	2515	5	FALSE	TRUE	FALSE	TRUE	FALSE	FALSE	FALSE	FALSE	FALSE	FALSE	TRUE	FALSE	Cytoplasm	1	8	CHEMBL2108280	CENERSEN	FALSE	2	FALSE	Reactome	Transcriptional Regulation by TP53	9	0	3	5	0	0	2544.5
TP53	ENSG00000141510	tumor protein p53	2515	5	FALSE	TRUE	FALSE	TRUE	FALSE	FALSE	FALSE	FALSE	FALSE	FALSE	TRUE	FALSE	Cytoplasm	1	8	CHEMBL3186011	EPRENETAPOPT	FALSE	3	FALSE	Reactome	Cell Cycle Checkpoints	9	0	3	5	0	0	2544.5
TP53	ENSG00000141510	tumor protein p53	2515	5	FALSE	TRUE	FALSE	TRUE	FALSE	FALSE	FALSE	FALSE	FALSE	FALSE	TRUE	FALSE	Cytoplasm	1	8	CHEMBL2108585	CONTUSUGENE LADENOVEC	FALSE	2	FALSE	Reactome	G2/M DNA damage checkpoint	9	0	3	5	0	0	2544.5
TP53	ENSG00000141510	tumor protein p53	2515	5	FALSE	TRUE	FALSE	TRUE	FALSE	FALSE	FALSE	FALSE	FALSE	FALSE	TRUE	FALSE	Cytoplasm	1	8	CHEMBL2108585	CONTUSUGENE LADENOVEC	FALSE	2	FALSE	Reactome	DNA Repair	9	0	3	5	0	0	2544.5
TP53	ENSG00000141510	tumor protein p53	2515	5	FALSE	TRUE	FALSE	TRUE	FALSE	FALSE	FALSE	FALSE	FALSE	FALSE	TRUE	FALSE	Cytoplasm	1	8	CHEMBL2108585	CONTUSUGENE LADENOVEC	FALSE	2	FALSE	Reactome	SUMO E3 ligases SUMOylate target proteins	9	0	3	5	0	0	2544.5
TP53	ENSG00000141510	tumor protein p53	2515	5	FALSE	TRUE	FALSE	TRUE	FALSE	FALSE	FALSE	FALSE	FALSE	FALSE	TRUE	FALSE	Cytoplasm	1	8	CHEMBL2402737	IDASANUTLIN	FALSE	3	FALSE	Reactome	G2/M DNA damage checkpoint	9	0	3	5	0	0	2544.5
TP53	ENSG00000141510	tumor protein p53	2515	5	FALSE	TRUE	FALSE	TRUE	FALSE	FALSE	FALSE	FALSE	FALSE	FALSE	TRUE	FALSE	Cytoplasm	1	8	CHEMBL2108585	CONTUSUGENE LADENOVEC	FALSE	2	FALSE	Reactome	SUMO E3 ligases SUMOylate target proteins	9	0	3	5	0	0	2544.5
TP53	ENSG00000141510	tumor protein p53	2515	5	FALSE	TRUE	FALSE	TRUE	FALSE	FALSE	FALSE	FALSE	FALSE	FALSE	TRUE	FALSE	Cytoplasm	1	8	CHEMBL3186011	EPRENETAPOPT	FALSE	3	FALSE	Reactome	Cytokine Signaling in Immune system	9	0	3	5	0	0	2544.5
TP53	ENSG00000141510	tumor protein p53	2515	5	FALSE	TRUE	FALSE	TRUE	FALSE	FALSE	FALSE	FALSE	FALSE	FALSE	TRUE	FALSE	Cytoplasm	1	8	CHEMBL3125702	AMG-232	FALSE	2	FALSE	Reactome	Regulation of TP53 Activity	9	0	3	5	0	0	2544.5
TP53	ENSG00000141510	tumor protein p53	2515	5	FALSE	TRUE	FALSE	TRUE	FALSE	FALSE	FALSE	FALSE	FALSE	FALSE	TRUE	FALSE	Cytoplasm	1	8	CHEMBL3186011	EPRENETAPOPT	FALSE	3	FALSE	Reactome	Transcriptional Regulation by TP53	9	0	3	5	0	0	2544.5
TP53	ENSG00000141510	tumor protein p53	2515	5	FALSE	TRUE	FALSE	TRUE	FALSE	FALSE	FALSE	FALSE	FALSE	FALSE	TRUE	FALSE	Cytoplasm	1	8	CHEMBL2108585	CONTUSUGENE LADENOVEC	FALSE	2	FALSE	Reactome	Regulation of TP53 Activity	9	0	3	5	0	0	2544.5
TP53	ENSG00000141510	tumor protein p53	2515	5	FALSE	TRUE	FALSE	TRUE	FALSE	FALSE	FALSE	FALSE	FALSE	FALSE	TRUE	FALSE	Cytoplasm	1	8	CHEMBL3125702	AMG-232	FALSE	2	FALSE	Reactome	SUMO E3 ligases SUMOylate target proteins	9	0	3	5	0	0	2544.5
TP53	ENSG00000141510	tumor protein p53	2515	5	FALSE	TRUE	FALSE	TRUE	FALSE	FALSE	FALSE	FALSE	FALSE	FALSE	TRUE	FALSE	Cytoplasm	1	8	CHEMBL4297574	TEPRASIRAN	FALSE	3	FALSE	Reactome	SUMO E3 ligases SUMOylate target proteins	9	0	3	5	0	0	2544.5
TP53	ENSG00000141510	tumor protein p53	2515	5	FALSE	TRUE	FALSE	TRUE	FALSE	FALSE	FALSE	FALSE	FALSE	FALSE	TRUE	FALSE	Cytoplasm	1	8	CHEMBL2402737	IDASANUTLIN	FALSE	3	FALSE	Reactome	Transcriptional Regulation by TP53	9	0	3	5	0	0	2544.5
TP53	ENSG00000141510	tumor protein p53	2515	5	FALSE	TRUE	FALSE	TRUE	FALSE	FALSE	FALSE	FALSE	FALSE	FALSE	TRUE	FALSE	Cytoplasm	1	8	CHEMBL3125702	AMG-232	FALSE	2	FALSE	Reactome	G2/M Checkpoints	9	0	3	5	0	0	2544.5
TP53	ENSG00000141510	tumor protein p53	2515	5	FALSE	TRUE	FALSE	TRUE	FALSE	FALSE	FALSE	FALSE	FALSE	FALSE	TRUE	FALSE	Cytoplasm	1	8	CHEMBL2402737	IDASANUTLIN	FALSE	3	FALSE	Reactome	G2/M Checkpoints	9	0	3	5	0	0	2544.5
TP53	ENSG00000141510	tumor protein p53	2515	5	FALSE	TRUE	FALSE	TRUE	FALSE	FALSE	FALSE	FALSE	FALSE	FALSE	TRUE	FALSE	Cytoplasm	1	8	CHEMBL2108585	CONTUSUGENE LADENOVEC	FALSE	2	FALSE	Reactome	Regulation of TP53 Activity	9	0	3	5	0	0	2544.5
TP53	ENSG00000141510	tumor protein p53	2515	5	FALSE	TRUE	FALSE	TRUE	FALSE	FALSE	FALSE	FALSE	FALSE	FALSE	TRUE	FALSE	Cytoplasm	1	8	CHEMBL3125702	AMG-232	FALSE	2	FALSE	Reactome	G2/M DNA damage checkpoint	9	0	3	5	0	0	2544.5
TP53	ENSG00000141510	tumor protein p53	2515	5	FALSE	TRUE	FALSE	TRUE	FALSE	FALSE	FALSE	FALSE	FALSE	FALSE	TRUE	FALSE	Cytoplasm	1	8	CHEMBL3125702	AMG-232	FALSE	2	FALSE	Reactome	Cell Cycle Checkpoints	9	0	3	5	0	0	2544.5
TP53	ENSG00000141510	tumor protein p53	2515	5	FALSE	TRUE	FALSE	TRUE	FALSE	FALSE	FALSE	FALSE	FALSE	FALSE	TRUE	FALSE	Cytoplasm	1	8	CHEMBL3125702	AMG-232	FALSE	2	FALSE	Reactome	Cell Cycle Checkpoints	9	0	3	5	0	0	2544.5
TP53	ENSG00000141510	tumor protein p53	2515	5	FALSE	TRUE	FALSE	TRUE	FALSE	FALSE	FALSE	FALSE	FALSE	FALSE	TRUE	FALSE	Cytoplasm	1	8	CHEMBL2108280	CENERSEN	FALSE	2	FALSE	Reactome	G2/M DNA damage checkpoint	9	0	3	5	0	0	2544.5
TP53	ENSG00000141510	tumor protein p53	2515	5	FALSE	TRUE	FALSE	TRUE	FALSE	FALSE	FALSE	FALSE	FALSE	FALSE	TRUE	FALSE	Cytoplasm	1	8	CHEMBL3125702	AMG-232	FALSE	2	FALSE	Reactome	Transcriptional Regulation by TP53	9	0	3	5	0	0	2544.5
TP53	ENSG00000141510	tumor protein p53	2515	5	FALSE	TRUE	FALSE	TRUE	FALSE	FALSE	FALSE	FALSE	FALSE	FALSE	TRUE	FALSE	Cytoplasm	1	8	CHEMBL3186011	EPRENETAPOPT	FALSE	3	FALSE	Reactome	SUMOylation	9	0	3	5	0	0	2544.5
TP53	ENSG00000141510	tumor protein p53	2515	5	FALSE	TRUE	FALSE	TRUE	FALSE	FALSE	FALSE	FALSE	FALSE	FALSE	TRUE	FALSE	Cytoplasm	1	8	CHEMBL3125702	AMG-232	FALSE	2	FALSE	Reactome	Regulation of TP53 Activity	9	0	3	5	0	0	2544.5
TP53	ENSG00000141510	tumor protein p53	2515	5	FALSE	TRUE	FALSE	TRUE	FALSE	FALSE	FALSE	FALSE	FALSE	FALSE	TRUE	FALSE	Cytoplasm	1	8	CHEMBL3125702	AMG-232	FALSE	2	FALSE	Reactome	Regulation of TP53 Activity	9	0	3	5	0	0	2544.5
TP53	ENSG00000141510	tumor protein p53	2515	5	FALSE	TRUE	FALSE	TRUE	FALSE	FALSE	FALSE	FALSE	FALSE	FALSE	TRUE	FALSE	Cytoplasm	1	8	CHEMBL2108585	CONTUSUGENE LADENOVEC	FALSE	2	FALSE	Reactome	SUMOylation	9	0	3	5	0	0	2544.5
TP53	ENSG00000141510	tumor protein p53	2515	5	FALSE	TRUE	FALSE	TRUE	FALSE	FALSE	FALSE	FALSE	FALSE	FALSE	TRUE	FALSE	Cytoplasm	1	8	CHEMBL3186011	EPRENETAPOPT	FALSE	3	FALSE	Reactome	Transcriptional Regulation by TP53	9	0	3	5	0	0	2544.5
TP53	ENSG00000141510	tumor protein p53	2515	5	FALSE	TRUE	FALSE	TRUE	FALSE	FALSE	FALSE	FALSE	FALSE	FALSE	TRUE	FALSE	Cytoplasm	1	8	CHEMBL4091801	APG115	FALSE	2	FALSE	Reactome	SUMO E3 ligases SUMOylate target proteins	9	0	3	5	0	0	2544.5
TP53	ENSG00000141510	tumor protein p53	2515	5	FALSE	TRUE	FALSE	TRUE	FALSE	FALSE	FALSE	FALSE	FALSE	FALSE	TRUE	FALSE	Cytoplasm	1	8	CHEMBL2108585	CONTUSUGENE LADENOVEC	FALSE	2	FALSE	Reactome	Cell Cycle Checkpoints	9	0	3	5	0	0	2544.5
TP53	ENSG00000141510	tumor protein p53	2515	5	FALSE	TRUE	FALSE	TRUE	FALSE	FALSE	FALSE	FALSE	FALSE	FALSE	TRUE	FALSE	Cytoplasm	1	8	CHEMBL2402737	IDASANUTLIN	FALSE	3	FALSE	Reactome	G2/M DNA damage checkpoint	9	0	3	5	0	0	2544.5
TP53	ENSG00000141510	tumor protein p53	2515	5	FALSE	TRUE	FALSE	TRUE	FALSE	FALSE	FALSE	FALSE	FALSE	FALSE	TRUE	FALSE	Cytoplasm	1	8	CHEMBL2108585	CONTUSUGENE LADENOVEC	FALSE	2	FALSE	Reactome	Cell Cycle Checkpoints	9	0	3	5	0	0	2544.5
TP53	ENSG00000141510	tumor protein p53	2515	5	FALSE	TRUE	FALSE	TRUE	FALSE	FALSE	FALSE	FALSE	FALSE	FALSE	TRUE	FALSE	Cytoplasm	1	8	CHEMBL4297574	TEPRASIRAN	FALSE	3	FALSE	Reactome	Transcriptional Regulation by TP53	9	0	3	5	0	0	2544.5
TP53	ENSG00000141510	tumor protein p53	2515	5	FALSE	TRUE	FALSE	TRUE	FALSE	FALSE	FALSE	FALSE	FALSE	FALSE	TRUE	FALSE	Cytoplasm	1	8	CHEMBL3125702	AMG-232	FALSE	2	FALSE	Reactome	SUMO E3 ligases SUMOylate target proteins	9	0	3	5	0	0	2544.5
TP53	ENSG00000141510	tumor protein p53	2515	5	FALSE	TRUE	FALSE	TRUE	FALSE	FALSE	FALSE	FALSE	FALSE	FALSE	TRUE	FALSE	Cytoplasm	1	8	CHEMBL4091801	APG115	FALSE	2	FALSE	Reactome	Cell Cycle Checkpoints	9	0	3	5	0	0	2544.5
TP53	ENSG00000141510	tumor protein p53	2515	5	FALSE	TRUE	FALSE	TRUE	FALSE	FALSE	FALSE	FALSE	FALSE	FALSE	TRUE	FALSE	Cytoplasm	1	8	CHEMBL3125702	AMG-232	FALSE	2	FALSE	Reactome	SUMOylation	9	0	3	5	0	0	2544.5
TP53	ENSG00000141510	tumor protein p53	2515	5	FALSE	TRUE	FALSE	TRUE	FALSE	FALSE	FALSE	FALSE	FALSE	FALSE	TRUE	FALSE	Cytoplasm	1	8	CHEMBL2108280	CENERSEN	FALSE	2	FALSE	Reactome	SUMOylation	9	0	3	5	0	0	2544.5
TP53	ENSG00000141510	tumor protein p53	2515	5	FALSE	TRUE	FALSE	TRUE	FALSE	FALSE	FALSE	FALSE	FALSE	FALSE	TRUE	FALSE	Cytoplasm	1	8	CHEMBL3125702	AMG-232	FALSE	2	FALSE	Reactome	SUMOylation	9	0	3	5	0	0	2544.5
TP53	ENSG00000141510	tumor protein p53	2515	5	FALSE	TRUE	FALSE	TRUE	FALSE	FALSE	FALSE	FALSE	FALSE	FALSE	TRUE	FALSE	Cytoplasm	1	8	CHEMBL3186011	EPRENETAPOPT	FALSE	3	FALSE	Reactome	DNA Repair	9	0	3	5	0	0	2544.5
TP53	ENSG00000141510	tumor protein p53	2515	5	FALSE	TRUE	FALSE	TRUE	FALSE	FALSE	FALSE	FALSE	FALSE	FALSE	TRUE	FALSE	Cytoplasm	1	8	CHEMBL3125702	AMG-232	FALSE	2	FALSE	Reactome	Transcriptional Regulation by TP53	9	0	3	5	0	0	2544.5
TP53	ENSG00000141510	tumor protein p53	2515	5	FALSE	TRUE	FALSE	TRUE	FALSE	FALSE	FALSE	FALSE	FALSE	FALSE	TRUE	FALSE	Cytoplasm	1	8	CHEMBL2402737	IDASANUTLIN	FALSE	3	FALSE	Reactome	DNA Repair	9	0	3	5	0	0	2544.5
TP53	ENSG00000141510	tumor protein p53	2515	5	FALSE	TRUE	FALSE	TRUE	FALSE	FALSE	FALSE	FALSE	FALSE	FALSE	TRUE	FALSE	Cytoplasm	1	8	CHEMBL3125702	AMG-232	FALSE	2	FALSE	Reactome	DNA Repair	9	0	3	5	0	0	2544.5
TP53	ENSG00000141510	tumor protein p53	2515	5	FALSE	TRUE	FALSE	TRUE	FALSE	FALSE	FALSE	FALSE	FALSE	FALSE	TRUE	FALSE	Cytoplasm	1	8	CHEMBL3125702	AMG-232	FALSE	2	FALSE	Reactome	Regulation of TP53 Activity	9	0	3	5	0	0	2544.5
TP53	ENSG00000141510	tumor protein p53	2515	5	FALSE	TRUE	FALSE	TRUE	FALSE	FALSE	FALSE	FALSE	FALSE	FALSE	TRUE	FALSE	Cytoplasm	1	8	CHEMBL2108280	CENERSEN	FALSE	2	FALSE	Reactome	Cell Cycle Checkpoints	9	0	3	5	0	0	2544.5
TP53	ENSG00000141510	tumor protein p53	2515	5	FALSE	TRUE	FALSE	TRUE	FALSE	FALSE	FALSE	FALSE	FALSE	FALSE	TRUE	FALSE	Cytoplasm	1	8	CHEMBL2108585	CONTUSUGENE LADENOVEC	FALSE	2	FALSE	Reactome	DNA Repair	9	0	3	5	0	0	2544.5
TP53	ENSG00000141510	tumor protein p53	2515	5	FALSE	TRUE	FALSE	TRUE	FALSE	FALSE	FALSE	FALSE	FALSE	FALSE	TRUE	FALSE	Cytoplasm	1	8	CHEMBL3125702	AMG-232	FALSE	2	FALSE	Reactome	DNA Repair	9	0	3	5	0	0	2544.5
TP53	ENSG00000141510	tumor protein p53	2515	5	FALSE	TRUE	FALSE	TRUE	FALSE	FALSE	FALSE	FALSE	FALSE	FALSE	TRUE	FALSE	Cytoplasm	1	8	CHEMBL3125702	AMG-232	FALSE	2	FALSE	Reactome	Cell Cycle Checkpoints	9	0	3	5	0	0	2544.5
TP53	ENSG00000141510	tumor protein p53	2515	5	FALSE	TRUE	FALSE	TRUE	FALSE	FALSE	FALSE	FALSE	FALSE	FALSE	TRUE	FALSE	Cytoplasm	1	8	CHEMBL2108585	CONTUSUGENE LADENOVEC	FALSE	2	FALSE	Reactome	Cell Cycle Checkpoints	9	0	3	5	0	0	2544.5
TP53	ENSG00000141510	tumor protein p53	2515	5	FALSE	TRUE	FALSE	TRUE	FALSE	FALSE	FALSE	FALSE	FALSE	FALSE	TRUE	FALSE	Cytoplasm	1	8	CHEMBL3125702	AMG-232	FALSE	2	FALSE	Reactome	DNA Repair	9	0	3	5	0	0	2544.5
TP53	ENSG00000141510	tumor protein p53	2515	5	FALSE	TRUE	FALSE	TRUE	FALSE	FALSE	FALSE	FALSE	FALSE	FALSE	TRUE	FALSE	Cytoplasm	1	8	CHEMBL2402737	IDASANUTLIN	FALSE	3	FALSE	Reactome	G2/M DNA damage checkpoint	9	0	3	5	0	0	2544.5
TP53	ENSG00000141510	tumor protein p53	2515	5	FALSE	TRUE	FALSE	TRUE	FALSE	FALSE	FALSE	FALSE	FALSE	FALSE	TRUE	FALSE	Cytoplasm	1	8	CHEMBL3125702	AMG-232	FALSE	2	FALSE	Reactome	Transcriptional Regulation by TP53	9	0	3	5	0	0	2544.5
TP53	ENSG00000141510	tumor protein p53	2515	5	FALSE	TRUE	FALSE	TRUE	FALSE	FALSE	FALSE	FALSE	FALSE	FALSE	TRUE	FALSE	Cytoplasm	1	8	CHEMBL4297574	TEPRASIRAN	FALSE	3	FALSE	Reactome	G2/M DNA damage checkpoint	9	0	3	5	0	0	2544.5
TP53	ENSG00000141510	tumor protein p53	2515	5	FALSE	TRUE	FALSE	TRUE	FALSE	FALSE	FALSE	FALSE	FALSE	FALSE	TRUE	FALSE	Cytoplasm	1	8	CHEMBL3186011	EPRENETAPOPT	FALSE	3	FALSE	Reactome	G2/M DNA damage checkpoint	9	0	3	5	0	0	2544.5
TP53	ENSG00000141510	tumor protein p53	2515	5	FALSE	TRUE	FALSE	TRUE	FALSE	FALSE	FALSE	FALSE	FALSE	FALSE	TRUE	FALSE	Cytoplasm	1	8	CHEMBL4091801	APG115	FALSE	2	FALSE	Reactome	G2/M DNA damage checkpoint	9	0	3	5	0	0	2544.5
TP53	ENSG00000141510	tumor protein p53	2515	5	FALSE	TRUE	FALSE	TRUE	FALSE	FALSE	FALSE	FALSE	FALSE	FALSE	TRUE	FALSE	Cytoplasm	1	8	CHEMBL2108585	CONTUSUGENE LADENOVEC	FALSE	2	FALSE	Reactome	Transcriptional Regulation by TP53	9	0	3	5	0	0	2544.5
TP53	ENSG00000141510	tumor protein p53	2515	5	FALSE	TRUE	FALSE	TRUE	FALSE	FALSE	FALSE	FALSE	FALSE	FALSE	TRUE	FALSE	Cytoplasm	1	8	CHEMBL3186011	EPRENETAPOPT	FALSE	3	FALSE	Reactome	SUMOylation	9	0	3	5	0	0	2544.5
TP53	ENSG00000141510	tumor protein p53	2515	5	FALSE	TRUE	FALSE	TRUE	FALSE	FALSE	FALSE	FALSE	FALSE	FALSE	TRUE	FALSE	Cytoplasm	1	8	CHEMBL2108585	CONTUSUGENE LADENOVEC	FALSE	2	FALSE	Reactome	G2/M Checkpoints	9	0	3	5	0	0	2544.5
TP53	ENSG00000141510	tumor protein p53	2515	5	FALSE	TRUE	FALSE	TRUE	FALSE	FALSE	FALSE	FALSE	FALSE	FALSE	TRUE	FALSE	Cytoplasm	1	8	CHEMBL3186011	EPRENETAPOPT	FALSE	3	FALSE	Reactome	SUMOylation	9	0	3	5	0	0	2544.5
TP53	ENSG00000141510	tumor protein p53	2515	5	FALSE	TRUE	FALSE	TRUE	FALSE	FALSE	FALSE	FALSE	FALSE	FALSE	TRUE	FALSE	Cytoplasm	1	8	CHEMBL2108280	CENERSEN	FALSE	2	FALSE	Reactome	SUMOylation	9	0	3	5	0	0	2544.5
TP53	ENSG00000141510	tumor protein p53	2515	5	FALSE	TRUE	FALSE	TRUE	FALSE	FALSE	FALSE	FALSE	FALSE	FALSE	TRUE	FALSE	Cytoplasm	1	8	CHEMBL2108280	CENERSEN	FALSE	2	FALSE	Reactome	DNA Repair	9	0	3	5	0	0	2544.5
TP53	ENSG00000141510	tumor protein p53	2515	5	FALSE	TRUE	FALSE	TRUE	FALSE	FALSE	FALSE	FALSE	FALSE	FALSE	TRUE	FALSE	Cytoplasm	1	8	CHEMBL3125702	AMG-232	FALSE	2	FALSE	Reactome	Transcriptional Regulation by TP53	9	0	3	5	0	0	2544.5
TP53	ENSG00000141510	tumor protein p53	2515	5	FALSE	TRUE	FALSE	TRUE	FALSE	FALSE	FALSE	FALSE	FALSE	FALSE	TRUE	FALSE	Cytoplasm	1	8	CHEMBL2219776	CENERSEN SODIUM	FALSE	2	FALSE	Reactome	SUMOylation	9	0	3	5	0	0	2544.5
TP53	ENSG00000141510	tumor protein p53	2515	5	FALSE	TRUE	FALSE	TRUE	FALSE	FALSE	FALSE	FALSE	FALSE	FALSE	TRUE	FALSE	Cytoplasm	1	8	CHEMBL2108280	CENERSEN	FALSE	2	FALSE	Reactome	Transcriptional Regulation by TP53	9	0	3	5	0	0	2544.5
TP53	ENSG00000141510	tumor protein p53	2515	5	FALSE	TRUE	FALSE	TRUE	FALSE	FALSE	FALSE	FALSE	FALSE	FALSE	TRUE	FALSE	Cytoplasm	1	8	CHEMBL4297574	TEPRASIRAN	FALSE	3	FALSE	Reactome	Cell Cycle Checkpoints	9	0	3	5	0	0	2544.5
TP53	ENSG00000141510	tumor protein p53	2515	5	FALSE	TRUE	FALSE	TRUE	FALSE	FALSE	FALSE	FALSE	FALSE	FALSE	TRUE	FALSE	Cytoplasm	1	8	CHEMBL3125702	AMG-232	FALSE	2	FALSE	Reactome	DNA Repair	9	0	3	5	0	0	2544.5
TP53	ENSG00000141510	tumor protein p53	2515	5	FALSE	TRUE	FALSE	TRUE	FALSE	FALSE	FALSE	FALSE	FALSE	FALSE	TRUE	FALSE	Cytoplasm	1	8	CHEMBL2108280	CENERSEN	FALSE	2	FALSE	Reactome	G2/M DNA damage checkpoint	9	0	3	5	0	0	2544.5
TP53	ENSG00000141510	tumor protein p53	2515	5	FALSE	TRUE	FALSE	TRUE	FALSE	FALSE	FALSE	FALSE	FALSE	FALSE	TRUE	FALSE	Cytoplasm	1	8	CHEMBL2402737	IDASANUTLIN	FALSE	3	FALSE	Reactome	Cell Cycle Checkpoints	9	0	3	5	0	0	2544.5
TP53	ENSG00000141510	tumor protein p53	2515	5	FALSE	TRUE	FALSE	TRUE	FALSE	FALSE	FALSE	FALSE	FALSE	FALSE	TRUE	FALSE	Cytoplasm	1	8	CHEMBL3125702	AMG-232	FALSE	2	FALSE	Reactome	SUMO E3 ligases SUMOylate target proteins	9	0	3	5	0	0	2544.5
TP53	ENSG00000141510	tumor protein p53	2515	5	FALSE	TRUE	FALSE	TRUE	FALSE	FALSE	FALSE	FALSE	FALSE	FALSE	TRUE	FALSE	Cytoplasm	1	8	CHEMBL2108585	CONTUSUGENE LADENOVEC	FALSE	2	FALSE	Reactome	Transcriptional Regulation by TP53	9	0	3	5	0	0	2544.5
TP53	ENSG00000141510	tumor protein p53	2515	5	FALSE	TRUE	FALSE	TRUE	FALSE	FALSE	FALSE	FALSE	FALSE	FALSE	TRUE	FALSE	Cytoplasm	1	8	CHEMBL3186011	EPRENETAPOPT	FALSE	3	FALSE	Reactome	Transcriptional Regulation by TP53	9	0	3	5	0	0	2544.5
TP53	ENSG00000141510	tumor protein p53	2515	5	FALSE	TRUE	FALSE	TRUE	FALSE	FALSE	FALSE	FALSE	FALSE	FALSE	TRUE	FALSE	Cytoplasm	1	8	CHEMBL2108585	CONTUSUGENE LADENOVEC	FALSE	2	FALSE	Reactome	Regulation of TP53 Activity	9	0	3	5	0	0	2544.5
TP53	ENSG00000141510	tumor protein p53	2515	5	FALSE	TRUE	FALSE	TRUE	FALSE	FALSE	FALSE	FALSE	FALSE	FALSE	TRUE	FALSE	Cytoplasm	1	8	CHEMBL2108280	CENERSEN	FALSE	2	FALSE	Reactome	Cell Cycle Checkpoints	9	0	3	5	0	0	2544.5
TP53	ENSG00000141510	tumor protein p53	2515	5	FALSE	TRUE	FALSE	TRUE	FALSE	FALSE	FALSE	FALSE	FALSE	FALSE	TRUE	FALSE	Cytoplasm	1	8	CHEMBL2108585	CONTUSUGENE LADENOVEC	FALSE	2	FALSE	Reactome	G2/M DNA damage checkpoint	9	0	3	5	0	0	2544.5
TP53	ENSG00000141510	tumor protein p53	2515	5	FALSE	TRUE	FALSE	TRUE	FALSE	FALSE	FALSE	FALSE	FALSE	FALSE	TRUE	FALSE	Cytoplasm	1	8	CHEMBL2108585	CONTUSUGENE LADENOVEC	FALSE	2	FALSE	Reactome	Cell Cycle Checkpoints	9	0	3	5	0	0	2544.5
TP53	ENSG00000141510	tumor protein p53	2515	5	FALSE	TRUE	FALSE	TRUE	FALSE	FALSE	FALSE	FALSE	FALSE	FALSE	TRUE	FALSE	Cytoplasm	1	8	CHEMBL2219776	CENERSEN SODIUM	FALSE	2	FALSE	Reactome	Transcriptional Regulation by TP53	9	0	3	5	0	0	2544.5
TP53	ENSG00000141510	tumor protein p53	2515	5	FALSE	TRUE	FALSE	TRUE	FALSE	FALSE	FALSE	FALSE	FALSE	FALSE	TRUE	FALSE	Cytoplasm	1	8	CHEMBL2108585	CONTUSUGENE LADENOVEC	FALSE	2	FALSE	Reactome	SUMOylation	9	0	3	5	0	0	2544.5
TP53	ENSG00000141510	tumor protein p53	2515	5	FALSE	TRUE	FALSE	TRUE	FALSE	FALSE	FALSE	FALSE	FALSE	FALSE	TRUE	FALSE	Cytoplasm	1	8	CHEMBL4091801	APG115	FALSE	2	FALSE	Reactome	DNA Repair	9	0	3	5	0	0	2544.5
TP53	ENSG00000141510	tumor protein p53	2515	5	FALSE	TRUE	FALSE	TRUE	FALSE	FALSE	FALSE	FALSE	FALSE	FALSE	TRUE	FALSE	Cytoplasm	1	8	CHEMBL3186011	EPRENETAPOPT	FALSE	3	FALSE	Reactome	G2/M DNA damage checkpoint	9	0	3	5	0	0	2544.5
TP53	ENSG00000141510	tumor protein p53	2515	5	FALSE	TRUE	FALSE	TRUE	FALSE	FALSE	FALSE	FALSE	FALSE	FALSE	TRUE	FALSE	Cytoplasm	1	8	CHEMBL2108280	CENERSEN	FALSE	2	FALSE	Reactome	Transcriptional Regulation by TP53	9	0	3	5	0	0	2544.5
TP53	ENSG00000141510	tumor protein p53	2515	5	FALSE	TRUE	FALSE	TRUE	FALSE	FALSE	FALSE	FALSE	FALSE	FALSE	TRUE	FALSE	Cytoplasm	1	8	CHEMBL2402737	IDASANUTLIN	FALSE	3	FALSE	Reactome	SUMOylation	9	0	3	5	0	0	2544.5
TP53	ENSG00000141510	tumor protein p53	2515	5	FALSE	TRUE	FALSE	TRUE	FALSE	FALSE	FALSE	FALSE	FALSE	FALSE	TRUE	FALSE	Cytoplasm	1	8	CHEMBL2402737	IDASANUTLIN	FALSE	3	FALSE	Reactome	Transcriptional Regulation by TP53	9	0	3	5	0	0	2544.5
TP53	ENSG00000141510	tumor protein p53	2515	5	FALSE	TRUE	FALSE	TRUE	FALSE	FALSE	FALSE	FALSE	FALSE	FALSE	TRUE	FALSE	Cytoplasm	1	8	CHEMBL3125702	AMG-232	FALSE	2	FALSE	Reactome	G2/M DNA damage checkpoint	9	0	3	5	0	0	2544.5
TP53	ENSG00000141510	tumor protein p53	2515	5	FALSE	TRUE	FALSE	TRUE	FALSE	FALSE	FALSE	FALSE	FALSE	FALSE	TRUE	FALSE	Cytoplasm	1	8	CHEMBL2108585	CONTUSUGENE LADENOVEC	FALSE	2	FALSE	Reactome	Transcriptional Regulation by TP53	9	0	3	5	0	0	2544.5
TP53	ENSG00000141510	tumor protein p53	2515	5	FALSE	TRUE	FALSE	TRUE	FALSE	FALSE	FALSE	FALSE	FALSE	FALSE	TRUE	FALSE	Cytoplasm	1	8	CHEMBL3125702	AMG-232	FALSE	2	FALSE	Reactome	SUMOylation	9	0	3	5	0	0	2544.5
TP53	ENSG00000141510	tumor protein p53	2515	5	FALSE	TRUE	FALSE	TRUE	FALSE	FALSE	FALSE	FALSE	FALSE	FALSE	TRUE	FALSE	Cytoplasm	1	8	CHEMBL2108585	CONTUSUGENE LADENOVEC	FALSE	2	FALSE	Reactome	SUMOylation	9	0	3	5	0	0	2544.5
TP53	ENSG00000141510	tumor protein p53	2515	5	FALSE	TRUE	FALSE	TRUE	FALSE	FALSE	FALSE	FALSE	FALSE	FALSE	TRUE	FALSE	Cytoplasm	1	8	CHEMBL3125702	AMG-232	FALSE	2	FALSE	Reactome	G2/M DNA damage checkpoint	9	0	3	5	0	0	2544.5
TP53	ENSG00000141510	tumor protein p53	2515	5	FALSE	TRUE	FALSE	TRUE	FALSE	FALSE	FALSE	FALSE	FALSE	FALSE	TRUE	FALSE	Cytoplasm	1	8	CHEMBL4297574	TEPRASIRAN	FALSE	3	FALSE	Reactome	DNA Repair	9	0	3	5	0	0	2544.5
TP53	ENSG00000141510	tumor protein p53	2515	5	FALSE	TRUE	FALSE	TRUE	FALSE	FALSE	FALSE	FALSE	FALSE	FALSE	TRUE	FALSE	Cytoplasm	1	8	CHEMBL3186011	EPRENETAPOPT	FALSE	3	FALSE	Reactome	Cell Cycle Checkpoints	9	0	3	5	0	0	2544.5
TP53	ENSG00000141510	tumor protein p53	2515	5	FALSE	TRUE	FALSE	TRUE	FALSE	FALSE	FALSE	FALSE	FALSE	FALSE	TRUE	FALSE	Cytoplasm	1	8	CHEMBL2108585	CONTUSUGENE LADENOVEC	FALSE	2	FALSE	Reactome	SUMOylation	9	0	3	5	0	0	2544.5
TP53	ENSG00000141510	tumor protein p53	2515	5	FALSE	TRUE	FALSE	TRUE	FALSE	FALSE	FALSE	FALSE	FALSE	FALSE	TRUE	FALSE	Cytoplasm	1	8	CHEMBL3125702	AMG-232	FALSE	2	FALSE	Reactome	Cell Cycle Checkpoints	9	0	3	5	0	0	2544.5
TP53	ENSG00000141510	tumor protein p53	2515	5	FALSE	TRUE	FALSE	TRUE	FALSE	FALSE	FALSE	FALSE	FALSE	FALSE	TRUE	FALSE	Cytoplasm	1	8	CHEMBL2108585	CONTUSUGENE LADENOVEC	FALSE	2	FALSE	Reactome	G2/M DNA damage checkpoint	9	0	3	5	0	0	2544.5
TP53	ENSG00000141510	tumor protein p53	2515	5	FALSE	TRUE	FALSE	TRUE	FALSE	FALSE	FALSE	FALSE	FALSE	FALSE	TRUE	FALSE	Cytoplasm	1	8	CHEMBL3125702	AMG-232	FALSE	2	FALSE	Reactome	G2/M DNA damage checkpoint	9	0	3	5	0	0	2544.5
TP53	ENSG00000141510	tumor protein p53	2515	5	FALSE	TRUE	FALSE	TRUE	FALSE	FALSE	FALSE	FALSE	FALSE	FALSE	TRUE	FALSE	Cytoplasm	1	8	CHEMBL2402737	IDASANUTLIN	FALSE	3	FALSE	Reactome	Cytokine Signaling in Immune system	9	0	3	5	0	0	2544.5
TP53	ENSG00000141510	tumor protein p53	2515	5	FALSE	TRUE	FALSE	TRUE	FALSE	FALSE	FALSE	FALSE	FALSE	FALSE	TRUE	FALSE	Cytoplasm	1	8	CHEMBL2108585	CONTUSUGENE LADENOVEC	FALSE	2	FALSE	Reactome	G2/M DNA damage checkpoint	9	0	3	5	0	0	2544.5
TP53	ENSG00000141510	tumor protein p53	2515	5	FALSE	TRUE	FALSE	TRUE	FALSE	FALSE	FALSE	FALSE	FALSE	FALSE	TRUE	FALSE	Cytoplasm	1	8	CHEMBL3125702	AMG-232	FALSE	2	FALSE	Reactome	G2/M DNA damage checkpoint	9	0	3	5	0	0	2544.5
TP53	ENSG00000141510	tumor protein p53	2515	5	FALSE	TRUE	FALSE	TRUE	FALSE	FALSE	FALSE	FALSE	FALSE	FALSE	TRUE	FALSE	Cytoplasm	1	8	CHEMBL2402737	IDASANUTLIN	FALSE	3	FALSE	Reactome	Cell Cycle Checkpoints	9	0	3	5	0	0	2544.5
TP53	ENSG00000141510	tumor protein p53	2515	5	FALSE	TRUE	FALSE	TRUE	FALSE	FALSE	FALSE	FALSE	FALSE	FALSE	TRUE	FALSE	Cytoplasm	1	8	CHEMBL2108585	CONTUSUGENE LADENOVEC	FALSE	2	FALSE	Reactome	Cytokine Signaling in Immune system	9	0	3	5	0	0	2544.5
TP53	ENSG00000141510	tumor protein p53	2515	5	FALSE	TRUE	FALSE	TRUE	FALSE	FALSE	FALSE	FALSE	FALSE	FALSE	TRUE	FALSE	Cytoplasm	1	8	CHEMBL2108585	CONTUSUGENE LADENOVEC	FALSE	2	FALSE	Reactome	Cell Cycle Checkpoints	9	0	3	5	0	0	2544.5
IL6	ENSG00000136244	interleukin 6	2331	4	FALSE	FALSE	FALSE	FALSE	TRUE	FALSE	FALSE	FALSE	FALSE	FALSE	FALSE	FALSE	Secreted	2	8	CHEMBL1743050	OLOKIZUMAB	FALSE	3	FALSE	KEGG	HIF-1 signaling pathway	2	1	3	0	0	1	2348.5
IL6	ENSG00000136244	interleukin 6	2331	4	FALSE	FALSE	FALSE	FALSE	TRUE	FALSE	FALSE	FALSE	FALSE	FALSE	FALSE	FALSE	Secreted	2	8	CHEMBL2108589	CLAZAKIZUMAB	FALSE	3	FALSE	Reactome	Cytokine Signaling in Immune system	2	1	3	0	0	1	2348.5
IL6	ENSG00000136244	interleukin 6	2331	4	FALSE	FALSE	FALSE	FALSE	TRUE	FALSE	FALSE	FALSE	FALSE	FALSE	FALSE	FALSE	Secreted	2	8	CHEMBL1743071	SIRUKUMAB	FALSE	3	FALSE	KEGG	HIF-1 signaling pathway	2	1	3	0	0	1	2348.5
IL6	ENSG00000136244	interleukin 6	2331	4	FALSE	FALSE	FALSE	FALSE	TRUE	FALSE	FALSE	FALSE	FALSE	FALSE	FALSE	FALSE	Secreted	2	8	CHEMBL1743050	OLOKIZUMAB	FALSE	3	FALSE	KEGG	HIF-1 signaling pathway	2	1	3	0	0	1	2348.5
IL6	ENSG00000136244	interleukin 6	2331	4	FALSE	FALSE	FALSE	FALSE	TRUE	FALSE	FALSE	FALSE	FALSE	FALSE	FALSE	FALSE	Secreted	2	8	CHEMBL1743050	OLOKIZUMAB	FALSE	3	FALSE	KEGG	HIF-1 signaling pathway	2	1	3	0	0	1	2348.5
IL6	ENSG00000136244	interleukin 6	2331	4	FALSE	FALSE	FALSE	FALSE	TRUE	FALSE	FALSE	FALSE	FALSE	FALSE	FALSE	FALSE	Secreted	2	8	CHEMBL2108589	CLAZAKIZUMAB	FALSE	3	FALSE	Reactome	Cytokine Signaling in Immune system	2	1	3	0	0	1	2348.5
IL6	ENSG00000136244	interleukin 6	2331	4	FALSE	FALSE	FALSE	FALSE	TRUE	FALSE	FALSE	FALSE	FALSE	FALSE	FALSE	FALSE	Secreted	2	8	CHEMBL2108589	CLAZAKIZUMAB	FALSE	3	FALSE	Reactome	Cytokine Signaling in Immune system	2	1	3	0	0	1	2348.5
IL6	ENSG00000136244	interleukin 6	2331	4	FALSE	FALSE	FALSE	FALSE	TRUE	FALSE	FALSE	FALSE	FALSE	FALSE	FALSE	FALSE	Secreted	2	8	CHEMBL2108589	CLAZAKIZUMAB	FALSE	3	FALSE	KEGG	HIF-1 signaling pathway	2	1	3	0	0	1	2348.5
IL6	ENSG00000136244	interleukin 6	2331	4	FALSE	FALSE	FALSE	FALSE	TRUE	FALSE	FALSE	FALSE	FALSE	FALSE	FALSE	FALSE	Secreted	2	8	CHEMBL1743071	SIRUKUMAB	FALSE	3	FALSE	KEGG	HIF-1 signaling pathway	2	1	3	0	0	1	2348.5
IL6	ENSG00000136244	interleukin 6	2331	4	FALSE	FALSE	FALSE	FALSE	TRUE	FALSE	FALSE	FALSE	FALSE	FALSE	FALSE	FALSE	Secreted	2	8	CHEMBL1743071	SIRUKUMAB	FALSE	3	FALSE	KEGG	HIF-1 signaling pathway	2	1	3	0	0	1	2348.5
IL6	ENSG00000136244	interleukin 6	2331	4	FALSE	FALSE	FALSE	FALSE	TRUE	FALSE	FALSE	FALSE	FALSE	FALSE	FALSE	FALSE	Secreted	2	8	CHEMBL1743071	SIRUKUMAB	FALSE	3	FALSE	Reactome	Cytokine Signaling in Immune system	2	1	3	0	0	1	2348.5
IL6	ENSG00000136244	interleukin 6	2331	4	FALSE	FALSE	FALSE	FALSE	TRUE	FALSE	FALSE	FALSE	FALSE	FALSE	FALSE	FALSE	Secreted	2	8	CHEMBL2108589	CLAZAKIZUMAB	FALSE	3	FALSE	Reactome	Cytokine Signaling in Immune system	2	1	3	0	0	1	2348.5
IL6	ENSG00000136244	interleukin 6	2331	4	FALSE	FALSE	FALSE	FALSE	TRUE	FALSE	FALSE	FALSE	FALSE	FALSE	FALSE	FALSE	Secreted	2	8	CHEMBL1743071	SIRUKUMAB	FALSE	3	FALSE	Reactome	Cytokine Signaling in Immune system	2	1	3	0	0	1	2348.5
IL6	ENSG00000136244	interleukin 6	2331	4	FALSE	FALSE	FALSE	FALSE	TRUE	FALSE	FALSE	FALSE	FALSE	FALSE	FALSE	FALSE	Secreted	2	8	CHEMBL1743070	SILTUXIMAB	TRUE	4	FALSE	KEGG	HIF-1 signaling pathway	2	1	3	0	0	1	2348.5
IL6	ENSG00000136244	interleukin 6	2331	4	FALSE	FALSE	FALSE	FALSE	TRUE	FALSE	FALSE	FALSE	FALSE	FALSE	FALSE	FALSE	Secreted	2	8	CHEMBL1743050	OLOKIZUMAB	FALSE	3	FALSE	Reactome	Cytokine Signaling in Immune system	2	1	3	0	0	1	2348.5
IL6	ENSG00000136244	interleukin 6	2331	4	FALSE	FALSE	FALSE	FALSE	TRUE	FALSE	FALSE	FALSE	FALSE	FALSE	FALSE	FALSE	Secreted	2	8	CHEMBL1743070	SILTUXIMAB	TRUE	4	FALSE	Reactome	Cytokine Signaling in Immune system	2	1	3	0	0	1	2348.5
IL6	ENSG00000136244	interleukin 6	2331	4	FALSE	FALSE	FALSE	FALSE	TRUE	FALSE	FALSE	FALSE	FALSE	FALSE	FALSE	FALSE	Secreted	2	8	CHEMBL1743070	SILTUXIMAB	TRUE	4	FALSE	Reactome	Cytokine Signaling in Immune system	2	1	3	0	0	1	2348.5
IL6	ENSG00000136244	interleukin 6	2331	4	FALSE	FALSE	FALSE	FALSE	TRUE	FALSE	FALSE	FALSE	FALSE	FALSE	FALSE	FALSE	Secreted	2	8	CHEMBL1743050	OLOKIZUMAB	FALSE	3	FALSE	KEGG	HIF-1 signaling pathway	2	1	3	0	0	1	2348.5
IL6	ENSG00000136244	interleukin 6	2331	4	FALSE	FALSE	FALSE	FALSE	TRUE	FALSE	FALSE	FALSE	FALSE	FALSE	FALSE	FALSE	Secreted	2	8	CHEMBL1743071	SIRUKUMAB	FALSE	3	FALSE	KEGG	HIF-1 signaling pathway	2	1	3	0	0	1	2348.5
IL6	ENSG00000136244	interleukin 6	2331	4	FALSE	FALSE	FALSE	FALSE	TRUE	FALSE	FALSE	FALSE	FALSE	FALSE	FALSE	FALSE	Secreted	2	8	CHEMBL1743071	SIRUKUMAB	FALSE	3	FALSE	Reactome	Cytokine Signaling in Immune system	2	1	3	0	0	1	2348.5
IL6	ENSG00000136244	interleukin 6	2331	4	FALSE	FALSE	FALSE	FALSE	TRUE	FALSE	FALSE	FALSE	FALSE	FALSE	FALSE	FALSE	Secreted	2	8	CHEMBL1743070	SILTUXIMAB	TRUE	4	FALSE	KEGG	HIF-1 signaling pathway	2	1	3	0	0	1	2348.5
IL6	ENSG00000136244	interleukin 6	2331	4	FALSE	FALSE	FALSE	FALSE	TRUE	FALSE	FALSE	FALSE	FALSE	FALSE	FALSE	FALSE	Secreted	2	8	CHEMBL2108589	CLAZAKIZUMAB	FALSE	3	FALSE	KEGG	HIF-1 signaling pathway	2	1	3	0	0	1	2348.5
IL6	ENSG00000136244	interleukin 6	2331	4	FALSE	FALSE	FALSE	FALSE	TRUE	FALSE	FALSE	FALSE	FALSE	FALSE	FALSE	FALSE	Secreted	2	8	CHEMBL1743050	OLOKIZUMAB	FALSE	3	FALSE	Reactome	Cytokine Signaling in Immune system	2	1	3	0	0	1	2348.5
IL6	ENSG00000136244	interleukin 6	2331	4	FALSE	FALSE	FALSE	FALSE	TRUE	FALSE	FALSE	FALSE	FALSE	FALSE	FALSE	FALSE	Secreted	2	8	CHEMBL1743070	SILTUXIMAB	TRUE	4	FALSE	KEGG	HIF-1 signaling pathway	2	1	3	0	0	1	2348.5
IL6	ENSG00000136244	interleukin 6	2331	4	FALSE	FALSE	FALSE	FALSE	TRUE	FALSE	FALSE	FALSE	FALSE	FALSE	FALSE	FALSE	Secreted	2	8	CHEMBL1743071	SIRUKUMAB	FALSE	3	FALSE	KEGG	HIF-1 signaling pathway	2	1	3	0	0	1	2348.5
IL6	ENSG00000136244	interleukin 6	2331	4	FALSE	FALSE	FALSE	FALSE	TRUE	FALSE	FALSE	FALSE	FALSE	FALSE	FALSE	FALSE	Secreted	2	8	CHEMBL1743050	OLOKIZUMAB	FALSE	3	FALSE	Reactome	Cytokine Signaling in Immune system	2	1	3	0	0	1	2348.5
IL6	ENSG00000136244	interleukin 6	2331	4	FALSE	FALSE	FALSE	FALSE	TRUE	FALSE	FALSE	FALSE	FALSE	FALSE	FALSE	FALSE	Secreted	2	8	CHEMBL1743070	SILTUXIMAB	TRUE	4	FALSE	Reactome	Cytokine Signaling in Immune system	2	1	3	0	0	1	2348.5
IL6	ENSG00000136244	interleukin 6	2331	4	FALSE	FALSE	FALSE	FALSE	TRUE	FALSE	FALSE	FALSE	FALSE	FALSE	FALSE	FALSE	Secreted	2	8	CHEMBL1743071	SIRUKUMAB	FALSE	3	FALSE	Reactome	Cytokine Signaling in Immune system	2	1	3	0	0	1	2348.5
IL6	ENSG00000136244	interleukin 6	2331	4	FALSE	FALSE	FALSE	FALSE	TRUE	FALSE	FALSE	FALSE	FALSE	FALSE	FALSE	FALSE	Secreted	2	8	CHEMBL1743050	OLOKIZUMAB	FALSE	3	FALSE	Reactome	Cytokine Signaling in Immune system	2	1	3	0	0	1	2348.5
IL6	ENSG00000136244	interleukin 6	2331	4	FALSE	FALSE	FALSE	FALSE	TRUE	FALSE	FALSE	FALSE	FALSE	FALSE	FALSE	FALSE	Secreted	2	8	CHEMBL1743071	SIRUKUMAB	FALSE	3	FALSE	Reactome	Cytokine Signaling in Immune system	2	1	3	0	0	1	2348.5
IL6	ENSG00000136244	interleukin 6	2331	4	FALSE	FALSE	FALSE	FALSE	TRUE	FALSE	FALSE	FALSE	FALSE	FALSE	FALSE	FALSE	Secreted	2	8	CHEMBL1743070	SILTUXIMAB	TRUE	4	FALSE	KEGG	HIF-1 signaling pathway	2	1	3	0	0	1	2348.5
IL6	ENSG00000136244	interleukin 6	2331	4	FALSE	FALSE	FALSE	FALSE	TRUE	FALSE	FALSE	FALSE	FALSE	FALSE	FALSE	FALSE	Secreted	2	8	CHEMBL2108589	CLAZAKIZUMAB	FALSE	3	FALSE	Reactome	Cytokine Signaling in Immune system	2	1	3	0	0	1	2348.5
IL6	ENSG00000136244	interleukin 6	2331	4	FALSE	FALSE	FALSE	FALSE	TRUE	FALSE	FALSE	FALSE	FALSE	FALSE	FALSE	FALSE	Secreted	2	8	CHEMBL1743050	OLOKIZUMAB	FALSE	3	FALSE	Reactome	Cytokine Signaling in Immune system	2	1	3	0	0	1	2348.5
IL6	ENSG00000136244	interleukin 6	2331	4	FALSE	FALSE	FALSE	FALSE	TRUE	FALSE	FALSE	FALSE	FALSE	FALSE	FALSE	FALSE	Secreted	2	8	CHEMBL1743071	SIRUKUMAB	FALSE	3	FALSE	Reactome	Cytokine Signaling in Immune system	2	1	3	0	0	1	2348.5
IL6	ENSG00000136244	interleukin 6	2331	4	FALSE	FALSE	FALSE	FALSE	TRUE	FALSE	FALSE	FALSE	FALSE	FALSE	FALSE	FALSE	Secreted	2	8	CHEMBL1743071	SIRUKUMAB	FALSE	3	FALSE	Reactome	Cytokine Signaling in Immune system	2	1	3	0	0	1	2348.5
IL6	ENSG00000136244	interleukin 6	2331	4	FALSE	FALSE	FALSE	FALSE	TRUE	FALSE	FALSE	FALSE	FALSE	FALSE	FALSE	FALSE	Secreted	2	8	CHEMBL1743070	SILTUXIMAB	TRUE	4	FALSE	Reactome	Cytokine Signaling in Immune system	2	1	3	0	0	1	2348.5
IL6	ENSG00000136244	interleukin 6	2331	4	FALSE	FALSE	FALSE	FALSE	TRUE	FALSE	FALSE	FALSE	FALSE	FALSE	FALSE	FALSE	Secreted	2	8	CHEMBL1743050	OLOKIZUMAB	FALSE	3	FALSE	KEGG	HIF-1 signaling pathway	2	1	3	0	0	1	2348.5
IL6	ENSG00000136244	interleukin 6	2331	4	FALSE	FALSE	FALSE	FALSE	TRUE	FALSE	FALSE	FALSE	FALSE	FALSE	FALSE	FALSE	Secreted	2	8	CHEMBL1743071	SIRUKUMAB	FALSE	3	FALSE	KEGG	HIF-1 signaling pathway	2	1	3	0	0	1	2348.5
IL6	ENSG00000136244	interleukin 6	2331	4	FALSE	FALSE	FALSE	FALSE	TRUE	FALSE	FALSE	FALSE	FALSE	FALSE	FALSE	FALSE	Secreted	2	8	CHEMBL1743071	SIRUKUMAB	FALSE	3	FALSE	KEGG	HIF-1 signaling pathway	2	1	3	0	0	1	2348.5
IL6	ENSG00000136244	interleukin 6	2331	4	FALSE	FALSE	FALSE	FALSE	TRUE	FALSE	FALSE	FALSE	FALSE	FALSE	FALSE	FALSE	Secreted	2	8	CHEMBL2108589	CLAZAKIZUMAB	FALSE	3	FALSE	KEGG	HIF-1 signaling pathway	2	1	3	0	0	1	2348.5
IL6	ENSG00000136244	interleukin 6	2331	4	FALSE	FALSE	FALSE	FALSE	TRUE	FALSE	FALSE	FALSE	FALSE	FALSE	FALSE	FALSE	Secreted	2	8	CHEMBL1743050	OLOKIZUMAB	FALSE	3	FALSE	Reactome	Cytokine Signaling in Immune system	2	1	3	0	0	1	2348.5
IL6	ENSG00000136244	interleukin 6	2331	4	FALSE	FALSE	FALSE	FALSE	TRUE	FALSE	FALSE	FALSE	FALSE	FALSE	FALSE	FALSE	Secreted	2	8	CHEMBL1743070	SILTUXIMAB	TRUE	4	FALSE	Reactome	Cytokine Signaling in Immune system	2	1	3	0	0	1	2348.5
IL6	ENSG00000136244	interleukin 6	2331	4	FALSE	FALSE	FALSE	FALSE	TRUE	FALSE	FALSE	FALSE	FALSE	FALSE	FALSE	FALSE	Secreted	2	8	CHEMBL2108589	CLAZAKIZUMAB	FALSE	3	FALSE	KEGG	HIF-1 signaling pathway	2	1	3	0	0	1	2348.5
IL6	ENSG00000136244	interleukin 6	2331	4	FALSE	FALSE	FALSE	FALSE	TRUE	FALSE	FALSE	FALSE	FALSE	FALSE	FALSE	FALSE	Secreted	2	8	CHEMBL1743070	SILTUXIMAB	TRUE	4	FALSE	KEGG	HIF-1 signaling pathway	2	1	3	0	0	1	2348.5
IL6	ENSG00000136244	interleukin 6	2331	4	FALSE	FALSE	FALSE	FALSE	TRUE	FALSE	FALSE	FALSE	FALSE	FALSE	FALSE	FALSE	Secreted	2	8	CHEMBL1743070	SILTUXIMAB	TRUE	4	FALSE	KEGG	HIF-1 signaling pathway	2	1	3	0	0	1	2348.5
IL6	ENSG00000136244	interleukin 6	2331	4	FALSE	FALSE	FALSE	FALSE	TRUE	FALSE	FALSE	FALSE	FALSE	FALSE	FALSE	FALSE	Secreted	2	8	CHEMBL2108589	CLAZAKIZUMAB	FALSE	3	FALSE	KEGG	HIF-1 signaling pathway	2	1	3	0	0	1	2348.5
IL6	ENSG00000136244	interleukin 6	2331	4	FALSE	FALSE	FALSE	FALSE	TRUE	FALSE	FALSE	FALSE	FALSE	FALSE	FALSE	FALSE	Secreted	2	8	CHEMBL2108589	CLAZAKIZUMAB	FALSE	3	FALSE	Reactome	Cytokine Signaling in Immune system	2	1	3	0	0	1	2348.5
IL6	ENSG00000136244	interleukin 6	2331	4	FALSE	FALSE	FALSE	FALSE	TRUE	FALSE	FALSE	FALSE	FALSE	FALSE	FALSE	FALSE	Secreted	2	8	CHEMBL1743070	SILTUXIMAB	TRUE	4	FALSE	Reactome	Cytokine Signaling in Immune system	2	1	3	0	0	1	2348.5
IL6	ENSG00000136244	interleukin 6	2331	4	FALSE	FALSE	FALSE	FALSE	TRUE	FALSE	FALSE	FALSE	FALSE	FALSE	FALSE	FALSE	Secreted	2	8	CHEMBL2108589	CLAZAKIZUMAB	FALSE	3	FALSE	KEGG	HIF-1 signaling pathway	2	1	3	0	0	1	2348.5
IL6	ENSG00000136244	interleukin 6	2331	4	FALSE	FALSE	FALSE	FALSE	TRUE	FALSE	FALSE	FALSE	FALSE	FALSE	FALSE	FALSE	Secreted	2	8	CHEMBL1743050	OLOKIZUMAB	FALSE	3	FALSE	KEGG	HIF-1 signaling pathway	2	1	3	0	0	1	2348.5
VEGFA	ENSG00000112715	vascular endothelial growth factor A	2188	5	FALSE	FALSE	FALSE	FALSE	TRUE	FALSE	FALSE	FALSE	FALSE	TRUE	FALSE	FALSE	Secreted	0	11	CHEMBL1201421	PEGAPTANIB SODIUM	TRUE	4	FALSE	KEGG	HIF-1 signaling pathway	2	4	1	0	0	4	2219.5
VEGFA	ENSG00000112715	vascular endothelial growth factor A	2188	5	FALSE	FALSE	FALSE	FALSE	TRUE	FALSE	FALSE	FALSE	FALSE	TRUE	FALSE	FALSE	Secreted	0	11	CHEMBL1201825	RANIBIZUMAB	TRUE	4	FALSE	KEGG	HIF-1 signaling pathway	2	4	1	0	0	4	2219.5
VEGFA	ENSG00000112715	vascular endothelial growth factor A	2188	5	FALSE	FALSE	FALSE	FALSE	TRUE	FALSE	FALSE	FALSE	FALSE	TRUE	FALSE	FALSE	Secreted	0	11	CHEMBL1742982	AFLIBERCEPT	TRUE	4	FALSE	KEGG	HIF-1 signaling pathway	2	4	1	0	0	4	2219.5
VEGFA	ENSG00000112715	vascular endothelial growth factor A	2188	5	FALSE	FALSE	FALSE	FALSE	TRUE	FALSE	FALSE	FALSE	FALSE	TRUE	FALSE	FALSE	Secreted	0	11	CHEMBL1742982	AFLIBERCEPT	TRUE	4	FALSE	KEGG	HIF-1 signaling pathway	2	4	1	0	0	4	2219.5
VEGFA	ENSG00000112715	vascular endothelial growth factor A	2188	5	FALSE	FALSE	FALSE	FALSE	TRUE	FALSE	FALSE	FALSE	FALSE	TRUE	FALSE	FALSE	Secreted	0	11	CHEMBL1201825	RANIBIZUMAB	TRUE	4	FALSE	KEGG	HIF-1 signaling pathway	2	4	1	0	0	4	2219.5
VEGFA	ENSG00000112715	vascular endothelial growth factor A	2188	5	FALSE	FALSE	FALSE	FALSE	TRUE	FALSE	FALSE	FALSE	FALSE	TRUE	FALSE	FALSE	Secreted	0	11	CHEMBL1201825	RANIBIZUMAB	TRUE	4	FALSE	KEGG	HIF-1 signaling pathway	2	4	1	0	0	4	2219.5
VEGFA	ENSG00000112715	vascular endothelial growth factor A	2188	5	FALSE	FALSE	FALSE	FALSE	TRUE	FALSE	FALSE	FALSE	FALSE	TRUE	FALSE	FALSE	Secreted	0	11	CHEMBL1742982	AFLIBERCEPT	TRUE	4	FALSE	KEGG	HIF-1 signaling pathway	2	4	1	0	0	4	2219.5
VEGFA	ENSG00000112715	vascular endothelial growth factor A	2188	5	FALSE	FALSE	FALSE	FALSE	TRUE	FALSE	FALSE	FALSE	FALSE	TRUE	FALSE	FALSE	Secreted	0	11	CHEMBL1201825	RANIBIZUMAB	TRUE	4	FALSE	Reactome	Cytokine Signaling in Immune system	2	4	1	0	0	4	2219.5
VEGFA	ENSG00000112715	vascular endothelial growth factor A	2188	5	FALSE	FALSE	FALSE	FALSE	TRUE	FALSE	FALSE	FALSE	FALSE	TRUE	FALSE	FALSE	Secreted	0	11	CHEMBL1201825	RANIBIZUMAB	TRUE	4	FALSE	KEGG	HIF-1 signaling pathway	2	4	1	0	0	4	2219.5
VEGFA	ENSG00000112715	vascular endothelial growth factor A	2188	5	FALSE	FALSE	FALSE	FALSE	TRUE	FALSE	FALSE	FALSE	FALSE	TRUE	FALSE	FALSE	Secreted	0	11	CHEMBL1201583	BEVACIZUMAB	TRUE	4	FALSE	KEGG	HIF-1 signaling pathway	2	4	1	0	0	4	2219.5
VEGFA	ENSG00000112715	vascular endothelial growth factor A	2188	5	FALSE	FALSE	FALSE	FALSE	TRUE	FALSE	FALSE	FALSE	FALSE	TRUE	FALSE	FALSE	Secreted	0	11	CHEMBL1742982	AFLIBERCEPT	TRUE	4	FALSE	Reactome	Cytokine Signaling in Immune system	2	4	1	0	0	4	2219.5
VEGFA	ENSG00000112715	vascular endothelial growth factor A	2188	5	FALSE	FALSE	FALSE	FALSE	TRUE	FALSE	FALSE	FALSE	FALSE	TRUE	FALSE	FALSE	Secreted	0	11	CHEMBL1742982	AFLIBERCEPT	TRUE	4	FALSE	Reactome	Cytokine Signaling in Immune system	2	4	1	0	0	4	2219.5
VEGFA	ENSG00000112715	vascular endothelial growth factor A	2188	5	FALSE	FALSE	FALSE	FALSE	TRUE	FALSE	FALSE	FALSE	FALSE	TRUE	FALSE	FALSE	Secreted	0	11	CHEMBL1201825	RANIBIZUMAB	TRUE	4	FALSE	KEGG	HIF-1 signaling pathway	2	4	1	0	0	4	2219.5
VEGFA	ENSG00000112715	vascular endothelial growth factor A	2188	5	FALSE	FALSE	FALSE	FALSE	TRUE	FALSE	FALSE	FALSE	FALSE	TRUE	FALSE	FALSE	Secreted	0	11	CHEMBL1201583	BEVACIZUMAB	TRUE	4	FALSE	Reactome	Cytokine Signaling in Immune system	2	4	1	0	0	4	2219.5
VEGFA	ENSG00000112715	vascular endothelial growth factor A	2188	5	FALSE	FALSE	FALSE	FALSE	TRUE	FALSE	FALSE	FALSE	FALSE	TRUE	FALSE	FALSE	Secreted	0	11	CHEMBL2108313	CONBERCEPT	FALSE	3	FALSE	Reactome	Cytokine Signaling in Immune system	2	4	1	0	0	4	2219.5
VEGFA	ENSG00000112715	vascular endothelial growth factor A	2188	5	FALSE	FALSE	FALSE	FALSE	TRUE	FALSE	FALSE	FALSE	FALSE	TRUE	FALSE	FALSE	Secreted	0	11	CHEMBL1201825	RANIBIZUMAB	TRUE	4	FALSE	Reactome	Cytokine Signaling in Immune system	2	4	1	0	0	4	2219.5
VEGFA	ENSG00000112715	vascular endothelial growth factor A	2188	5	FALSE	FALSE	FALSE	FALSE	TRUE	FALSE	FALSE	FALSE	FALSE	TRUE	FALSE	FALSE	Secreted	0	11	CHEMBL1201583	BEVACIZUMAB	TRUE	4	FALSE	Reactome	Cytokine Signaling in Immune system	2	4	1	0	0	4	2219.5
VEGFA	ENSG00000112715	vascular endothelial growth factor A	2188	5	FALSE	FALSE	FALSE	FALSE	TRUE	FALSE	FALSE	FALSE	FALSE	TRUE	FALSE	FALSE	Secreted	0	11	CHEMBL1201583	BEVACIZUMAB	TRUE	4	FALSE	Reactome	Cytokine Signaling in Immune system	2	4	1	0	0	4	2219.5
VEGFA	ENSG00000112715	vascular endothelial growth factor A	2188	5	FALSE	FALSE	FALSE	FALSE	TRUE	FALSE	FALSE	FALSE	FALSE	TRUE	FALSE	FALSE	Secreted	0	11	CHEMBL1201825	RANIBIZUMAB	TRUE	4	FALSE	KEGG	HIF-1 signaling pathway	2	4	1	0	0	4	2219.5
VEGFA	ENSG00000112715	vascular endothelial growth factor A	2188	5	FALSE	FALSE	FALSE	FALSE	TRUE	FALSE	FALSE	FALSE	FALSE	TRUE	FALSE	FALSE	Secreted	0	11	CHEMBL1201825	RANIBIZUMAB	TRUE	4	FALSE	Reactome	Cytokine Signaling in Immune system	2	4	1	0	0	4	2219.5
VEGFA	ENSG00000112715	vascular endothelial growth factor A	2188	5	FALSE	FALSE	FALSE	FALSE	TRUE	FALSE	FALSE	FALSE	FALSE	TRUE	FALSE	FALSE	Secreted	0	11	CHEMBL1201825	RANIBIZUMAB	TRUE	4	FALSE	Reactome	Cytokine Signaling in Immune system	2	4	1	0	0	4	2219.5
VEGFA	ENSG00000112715	vascular endothelial growth factor A	2188	5	FALSE	FALSE	FALSE	FALSE	TRUE	FALSE	FALSE	FALSE	FALSE	TRUE	FALSE	FALSE	Secreted	0	11	CHEMBL1742982	AFLIBERCEPT	TRUE	4	FALSE	Reactome	Cytokine Signaling in Immune system	2	4	1	0	0	4	2219.5
VEGFA	ENSG00000112715	vascular endothelial growth factor A	2188	5	FALSE	FALSE	FALSE	FALSE	TRUE	FALSE	FALSE	FALSE	FALSE	TRUE	FALSE	FALSE	Secreted	0	11	CHEMBL1201583	BEVACIZUMAB	TRUE	4	FALSE	KEGG	HIF-1 signaling pathway	2	4	1	0	0	4	2219.5
VEGFA	ENSG00000112715	vascular endothelial growth factor A	2188	5	FALSE	FALSE	FALSE	FALSE	TRUE	FALSE	FALSE	FALSE	FALSE	TRUE	FALSE	FALSE	Secreted	0	11	CHEMBL1201421	PEGAPTANIB SODIUM	TRUE	4	FALSE	Reactome	Cytokine Signaling in Immune system	2	4	1	0	0	4	2219.5
VEGFA	ENSG00000112715	vascular endothelial growth factor A	2188	5	FALSE	FALSE	FALSE	FALSE	TRUE	FALSE	FALSE	FALSE	FALSE	TRUE	FALSE	FALSE	Secreted	0	11	CHEMBL1201825	RANIBIZUMAB	TRUE	4	FALSE	KEGG	HIF-1 signaling pathway	2	4	1	0	0	4	2219.5
VEGFA	ENSG00000112715	vascular endothelial growth factor A	2188	5	FALSE	FALSE	FALSE	FALSE	TRUE	FALSE	FALSE	FALSE	FALSE	TRUE	FALSE	FALSE	Secreted	0	11	CHEMBL2108313	CONBERCEPT	FALSE	3	FALSE	KEGG	HIF-1 signaling pathway	2	4	1	0	0	4	2219.5
VEGFA	ENSG00000112715	vascular endothelial growth factor A	2188	5	FALSE	FALSE	FALSE	FALSE	TRUE	FALSE	FALSE	FALSE	FALSE	TRUE	FALSE	FALSE	Secreted	0	11	CHEMBL1742982	AFLIBERCEPT	TRUE	4	FALSE	Reactome	Cytokine Signaling in Immune system	2	4	1	0	0	4	2219.5
VEGFA	ENSG00000112715	vascular endothelial growth factor A	2188	5	FALSE	FALSE	FALSE	FALSE	TRUE	FALSE	FALSE	FALSE	FALSE	TRUE	FALSE	FALSE	Secreted	0	11	CHEMBL1742982	AFLIBERCEPT	TRUE	4	FALSE	KEGG	HIF-1 signaling pathway	2	4	1	0	0	4	2219.5
VEGFA	ENSG00000112715	vascular endothelial growth factor A	2188	5	FALSE	FALSE	FALSE	FALSE	TRUE	FALSE	FALSE	FALSE	FALSE	TRUE	FALSE	FALSE	Secreted	0	11	CHEMBL1201825	RANIBIZUMAB	TRUE	4	FALSE	Reactome	Cytokine Signaling in Immune system	2	4	1	0	0	4	2219.5
VEGFA	ENSG00000112715	vascular endothelial growth factor A	2188	5	FALSE	FALSE	FALSE	FALSE	TRUE	FALSE	FALSE	FALSE	FALSE	TRUE	FALSE	FALSE	Secreted	0	11	CHEMBL1201583	BEVACIZUMAB	TRUE	4	FALSE	KEGG	HIF-1 signaling pathway	2	4	1	0	0	4	2219.5
VEGFA	ENSG00000112715	vascular endothelial growth factor A	2188	5	FALSE	FALSE	FALSE	FALSE	TRUE	FALSE	FALSE	FALSE	FALSE	TRUE	FALSE	FALSE	Secreted	0	11	CHEMBL1201825	RANIBIZUMAB	TRUE	4	FALSE	Reactome	Cytokine Signaling in Immune system	2	4	1	0	0	4	2219.5
VEGFA	ENSG00000112715	vascular endothelial growth factor A	2188	5	FALSE	FALSE	FALSE	FALSE	TRUE	FALSE	FALSE	FALSE	FALSE	TRUE	FALSE	FALSE	Secreted	0	11	CHEMBL1201421	PEGAPTANIB SODIUM	TRUE	4	FALSE	Reactome	Cytokine Signaling in Immune system	2	4	1	0	0	4	2219.5
VEGFA	ENSG00000112715	vascular endothelial growth factor A	2188	5	FALSE	FALSE	FALSE	FALSE	TRUE	FALSE	FALSE	FALSE	FALSE	TRUE	FALSE	FALSE	Secreted	0	11	CHEMBL1742982	AFLIBERCEPT	TRUE	4	FALSE	Reactome	Cytokine Signaling in Immune system	2	4	1	0	0	4	2219.5
VEGFA	ENSG00000112715	vascular endothelial growth factor A	2188	5	FALSE	FALSE	FALSE	FALSE	TRUE	FALSE	FALSE	FALSE	FALSE	TRUE	FALSE	FALSE	Secreted	0	11	CHEMBL1742982	AFLIBERCEPT	TRUE	4	FALSE	KEGG	HIF-1 signaling pathway	2	4	1	0	0	4	2219.5
VEGFA	ENSG00000112715	vascular endothelial growth factor A	2188	5	FALSE	FALSE	FALSE	FALSE	TRUE	FALSE	FALSE	FALSE	FALSE	TRUE	FALSE	FALSE	Secreted	0	11	CHEMBL1201583	BEVACIZUMAB	TRUE	4	FALSE	KEGG	HIF-1 signaling pathway	2	4	1	0	0	4	2219.5
VEGFA	ENSG00000112715	vascular endothelial growth factor A	2188	5	FALSE	FALSE	FALSE	FALSE	TRUE	FALSE	FALSE	FALSE	FALSE	TRUE	FALSE	FALSE	Secreted	0	11	CHEMBL1201421	PEGAPTANIB SODIUM	TRUE	4	FALSE	KEGG	HIF-1 signaling pathway	2	4	1	0	0	4	2219.5
VEGFA	ENSG00000112715	vascular endothelial growth factor A	2188	5	FALSE	FALSE	FALSE	FALSE	TRUE	FALSE	FALSE	FALSE	FALSE	TRUE	FALSE	FALSE	Secreted	0	11	CHEMBL1201825	RANIBIZUMAB	TRUE	4	FALSE	KEGG	HIF-1 signaling pathway	2	4	1	0	0	4	2219.5
VEGFA	ENSG00000112715	vascular endothelial growth factor A	2188	5	FALSE	FALSE	FALSE	FALSE	TRUE	FALSE	FALSE	FALSE	FALSE	TRUE	FALSE	FALSE	Secreted	0	11	CHEMBL1201825	RANIBIZUMAB	TRUE	4	FALSE	KEGG	HIF-1 signaling pathway	2	4	1	0	0	4	2219.5
VEGFA	ENSG00000112715	vascular endothelial growth factor A	2188	5	FALSE	FALSE	FALSE	FALSE	TRUE	FALSE	FALSE	FALSE	FALSE	TRUE	FALSE	FALSE	Secreted	0	11	CHEMBL1201825	RANIBIZUMAB	TRUE	4	FALSE	KEGG	HIF-1 signaling pathway	2	4	1	0	0	4	2219.5
VEGFA	ENSG00000112715	vascular endothelial growth factor A	2188	5	FALSE	FALSE	FALSE	FALSE	TRUE	FALSE	FALSE	FALSE	FALSE	TRUE	FALSE	FALSE	Secreted	0	11	CHEMBL1201825	RANIBIZUMAB	TRUE	4	FALSE	Reactome	Cytokine Signaling in Immune system	2	4	1	0	0	4	2219.5
VEGFA	ENSG00000112715	vascular endothelial growth factor A	2188	5	FALSE	FALSE	FALSE	FALSE	TRUE	FALSE	FALSE	FALSE	FALSE	TRUE	FALSE	FALSE	Secreted	0	11	CHEMBL1201825	RANIBIZUMAB	TRUE	4	FALSE	KEGG	HIF-1 signaling pathway	2	4	1	0	0	4	2219.5
VEGFA	ENSG00000112715	vascular endothelial growth factor A	2188	5	FALSE	FALSE	FALSE	FALSE	TRUE	FALSE	FALSE	FALSE	FALSE	TRUE	FALSE	FALSE	Secreted	0	11	CHEMBL1201825	RANIBIZUMAB	TRUE	4	FALSE	Reactome	Cytokine Signaling in Immune system	2	4	1	0	0	4	2219.5
VEGFA	ENSG00000112715	vascular endothelial growth factor A	2188	5	FALSE	FALSE	FALSE	FALSE	TRUE	FALSE	FALSE	FALSE	FALSE	TRUE	FALSE	FALSE	Secreted	0	11	CHEMBL1201583	BEVACIZUMAB	TRUE	4	FALSE	Reactome	Cytokine Signaling in Immune system	2	4	1	0	0	4	2219.5
VEGFA	ENSG00000112715	vascular endothelial growth factor A	2188	5	FALSE	FALSE	FALSE	FALSE	TRUE	FALSE	FALSE	FALSE	FALSE	TRUE	FALSE	FALSE	Secreted	0	11	CHEMBL1742982	AFLIBERCEPT	TRUE	4	FALSE	Reactome	Cytokine Signaling in Immune system	2	4	1	0	0	4	2219.5
VEGFA	ENSG00000112715	vascular endothelial growth factor A	2188	5	FALSE	FALSE	FALSE	FALSE	TRUE	FALSE	FALSE	FALSE	FALSE	TRUE	FALSE	FALSE	Secreted	0	11	CHEMBL1201825	RANIBIZUMAB	TRUE	4	FALSE	Reactome	Cytokine Signaling in Immune system	2	4	1	0	0	4	2219.5
VEGFA	ENSG00000112715	vascular endothelial growth factor A	2188	5	FALSE	FALSE	FALSE	FALSE	TRUE	FALSE	FALSE	FALSE	FALSE	TRUE	FALSE	FALSE	Secreted	0	11	CHEMBL1742982	AFLIBERCEPT	TRUE	4	FALSE	KEGG	HIF-1 signaling pathway	2	4	1	0	0	4	2219.5
VEGFA	ENSG00000112715	vascular endothelial growth factor A	2188	5	FALSE	FALSE	FALSE	FALSE	TRUE	FALSE	FALSE	FALSE	FALSE	TRUE	FALSE	FALSE	Secreted	0	11	CHEMBL1201825	RANIBIZUMAB	TRUE	4	FALSE	Reactome	Cytokine Signaling in Immune system	2	4	1	0	0	4	2219.5
VEGFA	ENSG00000112715	vascular endothelial growth factor A	2188	5	FALSE	FALSE	FALSE	FALSE	TRUE	FALSE	FALSE	FALSE	FALSE	TRUE	FALSE	FALSE	Secreted	0	11	CHEMBL1201583	BEVACIZUMAB	TRUE	4	FALSE	Reactome	Cytokine Signaling in Immune system	2	4	1	0	0	4	2219.5
VEGFA	ENSG00000112715	vascular endothelial growth factor A	2188	5	FALSE	FALSE	FALSE	FALSE	TRUE	FALSE	FALSE	FALSE	FALSE	TRUE	FALSE	FALSE	Secreted	0	11	CHEMBL1201583	BEVACIZUMAB	TRUE	4	FALSE	KEGG	HIF-1 signaling pathway	2	4	1	0	0	4	2219.5
VEGFA	ENSG00000112715	vascular endothelial growth factor A	2188	5	FALSE	FALSE	FALSE	FALSE	TRUE	FALSE	FALSE	FALSE	FALSE	TRUE	FALSE	FALSE	Secreted	0	11	CHEMBL1201825	RANIBIZUMAB	TRUE	4	FALSE	Reactome	Cytokine Signaling in Immune system	2	4	1	0	0	4	2219.5
CD4	ENSG00000010610	CD4 molecule	2011	3	FALSE	FALSE	FALSE	FALSE	TRUE	FALSE	FALSE	FALSE	FALSE	FALSE	TRUE	FALSE	Cell membrane	0	5	CHEMBL1743083	TREGALIZUMAB	FALSE	2	FALSE	NCI	TCR signaling in na√Øve CD4+ T cells	2	1	2	2	0	1	2029
CD4	ENSG00000010610	CD4 molecule	2011	3	FALSE	FALSE	FALSE	FALSE	TRUE	FALSE	FALSE	FALSE	FALSE	FALSE	TRUE	FALSE	Cell membrane	0	5	CHEMBL4298127	VRC-01LS	FALSE	2	FALSE	Reactome	Cytokine Signaling in Immune system	2	1	2	2	0	1	2029
CD4	ENSG00000010610	CD4 molecule	2011	3	FALSE	FALSE	FALSE	FALSE	TRUE	FALSE	FALSE	FALSE	FALSE	FALSE	TRUE	FALSE	Cell membrane	0	5	CHEMBL2108063	ZANOLIMUMAB	FALSE	3	FALSE	Reactome	Cytokine Signaling in Immune system	2	1	2	2	0	1	2029
CD4	ENSG00000010610	CD4 molecule	2011	3	FALSE	FALSE	FALSE	FALSE	TRUE	FALSE	FALSE	FALSE	FALSE	FALSE	TRUE	FALSE	Cell membrane	0	5	CHEMBL4297846	UB-421	FALSE	3	FALSE	NCI	TCR signaling in na√Øve CD4+ T cells	2	1	2	2	0	1	2029
CD4	ENSG00000010610	CD4 molecule	2011	3	FALSE	FALSE	FALSE	FALSE	TRUE	FALSE	FALSE	FALSE	FALSE	FALSE	TRUE	FALSE	Cell membrane	0	5	CHEMBL4297846	UB-421	FALSE	3	FALSE	NCI	TCR signaling in na√Øve CD4+ T cells	2	1	2	2	0	1	2029
CD4	ENSG00000010610	CD4 molecule	2011	3	FALSE	FALSE	FALSE	FALSE	TRUE	FALSE	FALSE	FALSE	FALSE	FALSE	TRUE	FALSE	Cell membrane	0	5	CHEMBL4297846	UB-421	FALSE	3	FALSE	Reactome	Cytokine Signaling in Immune system	2	1	2	2	0	1	2029
CD4	ENSG00000010610	CD4 molecule	2011	3	FALSE	FALSE	FALSE	FALSE	TRUE	FALSE	FALSE	FALSE	FALSE	FALSE	TRUE	FALSE	Cell membrane	0	5	CHEMBL2108063	ZANOLIMUMAB	FALSE	3	FALSE	NCI	TCR signaling in na√Øve CD4+ T cells	2	1	2	2	0	1	2029
CD4	ENSG00000010610	CD4 molecule	2011	3	FALSE	FALSE	FALSE	FALSE	TRUE	FALSE	FALSE	FALSE	FALSE	FALSE	TRUE	FALSE	Cell membrane	0	5	CHEMBL1743083	TREGALIZUMAB	FALSE	2	FALSE	NCI	TCR signaling in na√Øve CD4+ T cells	2	1	2	2	0	1	2029
CD4	ENSG00000010610	CD4 molecule	2011	3	FALSE	FALSE	FALSE	FALSE	TRUE	FALSE	FALSE	FALSE	FALSE	FALSE	TRUE	FALSE	Cell membrane	0	5	CHEMBL2108063	ZANOLIMUMAB	FALSE	3	FALSE	NCI	TCR signaling in na√Øve CD4+ T cells	2	1	2	2	0	1	2029
CD4	ENSG00000010610	CD4 molecule	2011	3	FALSE	FALSE	FALSE	FALSE	TRUE	FALSE	FALSE	FALSE	FALSE	FALSE	TRUE	FALSE	Cell membrane	0	5	CHEMBL1743029	IBALIZUMAB	TRUE	4	FALSE	NCI	TCR signaling in na√Øve CD4+ T cells	2	1	2	2	0	1	2029
CD4	ENSG00000010610	CD4 molecule	2011	3	FALSE	FALSE	FALSE	FALSE	TRUE	FALSE	FALSE	FALSE	FALSE	FALSE	TRUE	FALSE	Cell membrane	0	5	CHEMBL4297846	UB-421	FALSE	3	FALSE	Reactome	Cytokine Signaling in Immune system	2	1	2	2	0	1	2029
CD4	ENSG00000010610	CD4 molecule	2011	3	FALSE	FALSE	FALSE	FALSE	TRUE	FALSE	FALSE	FALSE	FALSE	FALSE	TRUE	FALSE	Cell membrane	0	5	CHEMBL4297846	UB-421	FALSE	3	FALSE	Reactome	Cytokine Signaling in Immune system	2	1	2	2	0	1	2029
CD4	ENSG00000010610	CD4 molecule	2011	3	FALSE	FALSE	FALSE	FALSE	TRUE	FALSE	FALSE	FALSE	FALSE	FALSE	TRUE	FALSE	Cell membrane	0	5	CHEMBL4297846	UB-421	FALSE	3	FALSE	NCI	TCR signaling in na√Øve CD4+ T cells	2	1	2	2	0	1	2029
CD4	ENSG00000010610	CD4 molecule	2011	3	FALSE	FALSE	FALSE	FALSE	TRUE	FALSE	FALSE	FALSE	FALSE	FALSE	TRUE	FALSE	Cell membrane	0	5	CHEMBL1743083	TREGALIZUMAB	FALSE	2	FALSE	NCI	TCR signaling in na√Øve CD4+ T cells	2	1	2	2	0	1	2029
CD4	ENSG00000010610	CD4 molecule	2011	3	FALSE	FALSE	FALSE	FALSE	TRUE	FALSE	FALSE	FALSE	FALSE	FALSE	TRUE	FALSE	Cell membrane	0	5	CHEMBL1743029	IBALIZUMAB	TRUE	4	FALSE	Reactome	Cytokine Signaling in Immune system	2	1	2	2	0	1	2029
CD4	ENSG00000010610	CD4 molecule	2011	3	FALSE	FALSE	FALSE	FALSE	TRUE	FALSE	FALSE	FALSE	FALSE	FALSE	TRUE	FALSE	Cell membrane	0	5	CHEMBL1743029	IBALIZUMAB	TRUE	4	FALSE	Reactome	Cytokine Signaling in Immune system	2	1	2	2	0	1	2029
CD4	ENSG00000010610	CD4 molecule	2011	3	FALSE	FALSE	FALSE	FALSE	TRUE	FALSE	FALSE	FALSE	FALSE	FALSE	TRUE	FALSE	Cell membrane	0	5	CHEMBL1743029	IBALIZUMAB	TRUE	4	FALSE	Reactome	Cytokine Signaling in Immune system	2	1	2	2	0	1	2029
CD4	ENSG00000010610	CD4 molecule	2011	3	FALSE	FALSE	FALSE	FALSE	TRUE	FALSE	FALSE	FALSE	FALSE	FALSE	TRUE	FALSE	Cell membrane	0	5	CHEMBL4297846	UB-421	FALSE	3	FALSE	NCI	TCR signaling in na√Øve CD4+ T cells	2	1	2	2	0	1	2029
CD4	ENSG00000010610	CD4 molecule	2011	3	FALSE	FALSE	FALSE	FALSE	TRUE	FALSE	FALSE	FALSE	FALSE	FALSE	TRUE	FALSE	Cell membrane	0	5	CHEMBL1743029	IBALIZUMAB	TRUE	4	FALSE	Reactome	Cytokine Signaling in Immune system	2	1	2	2	0	1	2029
CD4	ENSG00000010610	CD4 molecule	2011	3	FALSE	FALSE	FALSE	FALSE	TRUE	FALSE	FALSE	FALSE	FALSE	FALSE	TRUE	FALSE	Cell membrane	0	5	CHEMBL1743029	IBALIZUMAB	TRUE	4	FALSE	NCI	TCR signaling in na√Øve CD4+ T cells	2	1	2	2	0	1	2029
CD4	ENSG00000010610	CD4 molecule	2011	3	FALSE	FALSE	FALSE	FALSE	TRUE	FALSE	FALSE	FALSE	FALSE	FALSE	TRUE	FALSE	Cell membrane	0	5	CHEMBL4298127	VRC-01LS	FALSE	2	FALSE	NCI	TCR signaling in na√Øve CD4+ T cells	2	1	2	2	0	1	2029
CD4	ENSG00000010610	CD4 molecule	2011	3	FALSE	FALSE	FALSE	FALSE	TRUE	FALSE	FALSE	FALSE	FALSE	FALSE	TRUE	FALSE	Cell membrane	0	5	CHEMBL1743029	IBALIZUMAB	TRUE	4	FALSE	Reactome	Cytokine Signaling in Immune system	2	1	2	2	0	1	2029
CD4	ENSG00000010610	CD4 molecule	2011	3	FALSE	FALSE	FALSE	FALSE	TRUE	FALSE	FALSE	FALSE	FALSE	FALSE	TRUE	FALSE	Cell membrane	0	5	CHEMBL1743083	TREGALIZUMAB	FALSE	2	FALSE	Reactome	Cytokine Signaling in Immune system	2	1	2	2	0	1	2029
CD4	ENSG00000010610	CD4 molecule	2011	3	FALSE	FALSE	FALSE	FALSE	TRUE	FALSE	FALSE	FALSE	FALSE	FALSE	TRUE	FALSE	Cell membrane	0	5	CHEMBL4297846	UB-421	FALSE	3	FALSE	Reactome	Cytokine Signaling in Immune system	2	1	2	2	0	1	2029
CD4	ENSG00000010610	CD4 molecule	2011	3	FALSE	FALSE	FALSE	FALSE	TRUE	FALSE	FALSE	FALSE	FALSE	FALSE	TRUE	FALSE	Cell membrane	0	5	CHEMBL2108063	ZANOLIMUMAB	FALSE	3	FALSE	Reactome	Cytokine Signaling in Immune system	2	1	2	2	0	1	2029
CD4	ENSG00000010610	CD4 molecule	2011	3	FALSE	FALSE	FALSE	FALSE	TRUE	FALSE	FALSE	FALSE	FALSE	FALSE	TRUE	FALSE	Cell membrane	0	5	CHEMBL1743029	IBALIZUMAB	TRUE	4	FALSE	NCI	TCR signaling in na√Øve CD4+ T cells	2	1	2	2	0	1	2029
CD4	ENSG00000010610	CD4 molecule	2011	3	FALSE	FALSE	FALSE	FALSE	TRUE	FALSE	FALSE	FALSE	FALSE	FALSE	TRUE	FALSE	Cell membrane	0	5	CHEMBL1743029	IBALIZUMAB	TRUE	4	FALSE	NCI	TCR signaling in na√Øve CD4+ T cells	2	1	2	2	0	1	2029
CD4	ENSG00000010610	CD4 molecule	2011	3	FALSE	FALSE	FALSE	FALSE	TRUE	FALSE	FALSE	FALSE	FALSE	FALSE	TRUE	FALSE	Cell membrane	0	5	CHEMBL1743083	TREGALIZUMAB	FALSE	2	FALSE	Reactome	Cytokine Signaling in Immune system	2	1	2	2	0	1	2029
CD4	ENSG00000010610	CD4 molecule	2011	3	FALSE	FALSE	FALSE	FALSE	TRUE	FALSE	FALSE	FALSE	FALSE	FALSE	TRUE	FALSE	Cell membrane	0	5	CHEMBL4297846	UB-421	FALSE	3	FALSE	NCI	TCR signaling in na√Øve CD4+ T cells	2	1	2	2	0	1	2029
CD4	ENSG00000010610	CD4 molecule	2011	3	FALSE	FALSE	FALSE	FALSE	TRUE	FALSE	FALSE	FALSE	FALSE	FALSE	TRUE	FALSE	Cell membrane	0	5	CHEMBL1743029	IBALIZUMAB	TRUE	4	FALSE	Reactome	Cytokine Signaling in Immune system	2	1	2	2	0	1	2029
CD4	ENSG00000010610	CD4 molecule	2011	3	FALSE	FALSE	FALSE	FALSE	TRUE	FALSE	FALSE	FALSE	FALSE	FALSE	TRUE	FALSE	Cell membrane	0	5	CHEMBL1743083	TREGALIZUMAB	FALSE	2	FALSE	Reactome	Cytokine Signaling in Immune system	2	1	2	2	0	1	2029
CD4	ENSG00000010610	CD4 molecule	2011	3	FALSE	FALSE	FALSE	FALSE	TRUE	FALSE	FALSE	FALSE	FALSE	FALSE	TRUE	FALSE	Cell membrane	0	5	CHEMBL1743083	TREGALIZUMAB	FALSE	2	FALSE	NCI	TCR signaling in na√Øve CD4+ T cells	2	1	2	2	0	1	2029
CD4	ENSG00000010610	CD4 molecule	2011	3	FALSE	FALSE	FALSE	FALSE	TRUE	FALSE	FALSE	FALSE	FALSE	FALSE	TRUE	FALSE	Cell membrane	0	5	CHEMBL4297846	UB-421	FALSE	3	FALSE	NCI	TCR signaling in na√Øve CD4+ T cells	2	1	2	2	0	1	2029
CD4	ENSG00000010610	CD4 molecule	2011	3	FALSE	FALSE	FALSE	FALSE	TRUE	FALSE	FALSE	FALSE	FALSE	FALSE	TRUE	FALSE	Cell membrane	0	5	CHEMBL4297846	UB-421	FALSE	3	FALSE	Reactome	Cytokine Signaling in Immune system	2	1	2	2	0	1	2029
CD4	ENSG00000010610	CD4 molecule	2011	3	FALSE	FALSE	FALSE	FALSE	TRUE	FALSE	FALSE	FALSE	FALSE	FALSE	TRUE	FALSE	Cell membrane	0	5	CHEMBL1743029	IBALIZUMAB	TRUE	4	FALSE	NCI	TCR signaling in na√Øve CD4+ T cells	2	1	2	2	0	1	2029
CD4	ENSG00000010610	CD4 molecule	2011	3	FALSE	FALSE	FALSE	FALSE	TRUE	FALSE	FALSE	FALSE	FALSE	FALSE	TRUE	FALSE	Cell membrane	0	5	CHEMBL1743083	TREGALIZUMAB	FALSE	2	FALSE	Reactome	Cytokine Signaling in Immune system	2	1	2	2	0	1	2029
CD4	ENSG00000010610	CD4 molecule	2011	3	FALSE	FALSE	FALSE	FALSE	TRUE	FALSE	FALSE	FALSE	FALSE	FALSE	TRUE	FALSE	Cell membrane	0	5	CHEMBL2108063	ZANOLIMUMAB	FALSE	3	FALSE	NCI	TCR signaling in na√Øve CD4+ T cells	2	1	2	2	0	1	2029
CD4	ENSG00000010610	CD4 molecule	2011	3	FALSE	FALSE	FALSE	FALSE	TRUE	FALSE	FALSE	FALSE	FALSE	FALSE	TRUE	FALSE	Cell membrane	0	5	CHEMBL1743029	IBALIZUMAB	TRUE	4	FALSE	Reactome	Cytokine Signaling in Immune system	2	1	2	2	0	1	2029
CD4	ENSG00000010610	CD4 molecule	2011	3	FALSE	FALSE	FALSE	FALSE	TRUE	FALSE	FALSE	FALSE	FALSE	FALSE	TRUE	FALSE	Cell membrane	0	5	CHEMBL1743029	IBALIZUMAB	TRUE	4	FALSE	NCI	TCR signaling in na√Øve CD4+ T cells	2	1	2	2	0	1	2029
CD4	ENSG00000010610	CD4 molecule	2011	3	FALSE	FALSE	FALSE	FALSE	TRUE	FALSE	FALSE	FALSE	FALSE	FALSE	TRUE	FALSE	Cell membrane	0	5	CHEMBL1743029	IBALIZUMAB	TRUE	4	FALSE	NCI	TCR signaling in na√Øve CD4+ T cells	2	1	2	2	0	1	2029
CD4	ENSG00000010610	CD4 molecule	2011	3	FALSE	FALSE	FALSE	FALSE	TRUE	FALSE	FALSE	FALSE	FALSE	FALSE	TRUE	FALSE	Cell membrane	0	5	CHEMBL4297846	UB-421	FALSE	3	FALSE	Reactome	Cytokine Signaling in Immune system	2	1	2	2	0	1	2029
CD4	ENSG00000010610	CD4 molecule	2011	3	FALSE	FALSE	FALSE	FALSE	TRUE	FALSE	FALSE	FALSE	FALSE	FALSE	TRUE	FALSE	Cell membrane	0	5	CHEMBL2108063	ZANOLIMUMAB	FALSE	3	FALSE	Reactome	Cytokine Signaling in Immune system	2	1	2	2	0	1	2029
CD4	ENSG00000010610	CD4 molecule	2011	3	FALSE	FALSE	FALSE	FALSE	TRUE	FALSE	FALSE	FALSE	FALSE	FALSE	TRUE	FALSE	Cell membrane	0	5	CHEMBL4297846	UB-421	FALSE	3	FALSE	NCI	TCR signaling in na√Øve CD4+ T cells	2	1	2	2	0	1	2029
CD4	ENSG00000010610	CD4 molecule	2011	3	FALSE	FALSE	FALSE	FALSE	TRUE	FALSE	FALSE	FALSE	FALSE	FALSE	TRUE	FALSE	Cell membrane	0	5	CHEMBL2108063	ZANOLIMUMAB	FALSE	3	FALSE	NCI	TCR signaling in na√Øve CD4+ T cells	2	1	2	2	0	1	2029
CD4	ENSG00000010610	CD4 molecule	2011	3	FALSE	FALSE	FALSE	FALSE	TRUE	FALSE	FALSE	FALSE	FALSE	FALSE	TRUE	FALSE	Cell membrane	0	5	CHEMBL1743029	IBALIZUMAB	TRUE	4	FALSE	Reactome	Cytokine Signaling in Immune system	2	1	2	2	0	1	2029
CD4	ENSG00000010610	CD4 molecule	2011	3	FALSE	FALSE	FALSE	FALSE	TRUE	FALSE	FALSE	FALSE	FALSE	FALSE	TRUE	FALSE	Cell membrane	0	5	CHEMBL1743029	IBALIZUMAB	TRUE	4	FALSE	NCI	TCR signaling in na√Øve CD4+ T cells	2	1	2	2	0	1	2029
CD4	ENSG00000010610	CD4 molecule	2011	3	FALSE	FALSE	FALSE	FALSE	TRUE	FALSE	FALSE	FALSE	FALSE	FALSE	TRUE	FALSE	Cell membrane	0	5	CHEMBL4297846	UB-421	FALSE	3	FALSE	Reactome	Cytokine Signaling in Immune system	2	1	2	2	0	1	2029
CD4	ENSG00000010610	CD4 molecule	2011	3	FALSE	FALSE	FALSE	FALSE	TRUE	FALSE	FALSE	FALSE	FALSE	FALSE	TRUE	FALSE	Cell membrane	0	5	CHEMBL2108063	ZANOLIMUMAB	FALSE	3	FALSE	Reactome	Cytokine Signaling in Immune system	2	1	2	2	0	1	2029
CD4	ENSG00000010610	CD4 molecule	2011	3	FALSE	FALSE	FALSE	FALSE	TRUE	FALSE	FALSE	FALSE	FALSE	FALSE	TRUE	FALSE	Cell membrane	0	5	CHEMBL2108063	ZANOLIMUMAB	FALSE	3	FALSE	NCI	TCR signaling in na√Øve CD4+ T cells	2	1	2	2	0	1	2029
CD4	ENSG00000010610	CD4 molecule	2011	3	FALSE	FALSE	FALSE	FALSE	TRUE	FALSE	FALSE	FALSE	FALSE	FALSE	TRUE	FALSE	Cell membrane	0	5	CHEMBL2108063	ZANOLIMUMAB	FALSE	3	FALSE	Reactome	Cytokine Signaling in Immune system	2	1	2	2	0	1	2029
IFNG	ENSG00000111537	interferon gamma	1955	3	FALSE	FALSE	FALSE	FALSE	TRUE	FALSE	FALSE	FALSE	FALSE	FALSE	FALSE	FALSE	Secreted	0	3	CHEMBL3989977	EMAPALUMAB	TRUE	4	FALSE	Reactome	Cytokine Signaling in Immune system	3	1	0	1	1	1	1968.5
IFNG	ENSG00000111537	interferon gamma	1955	3	FALSE	FALSE	FALSE	FALSE	TRUE	FALSE	FALSE	FALSE	FALSE	FALSE	FALSE	FALSE	Secreted	0	3	CHEMBL2109450	AMG-811	FALSE	1	FALSE	Reactome	Cytokine Signaling in Immune system	3	1	0	1	1	1	1968.5
IFNG	ENSG00000111537	interferon gamma	1955	3	FALSE	FALSE	FALSE	FALSE	TRUE	FALSE	FALSE	FALSE	FALSE	FALSE	FALSE	FALSE	Secreted	0	3	CHEMBL3989977	EMAPALUMAB	TRUE	4	FALSE	KEGG	HIF-1 signaling pathway	3	1	0	1	1	1	1968.5
IFNG	ENSG00000111537	interferon gamma	1955	3	FALSE	FALSE	FALSE	FALSE	TRUE	FALSE	FALSE	FALSE	FALSE	FALSE	FALSE	FALSE	Secreted	0	3	CHEMBL3989977	EMAPALUMAB	TRUE	4	FALSE	Reactome	Cytokine Signaling in Immune system	3	1	0	1	1	1	1968.5
IFNG	ENSG00000111537	interferon gamma	1955	3	FALSE	FALSE	FALSE	FALSE	TRUE	FALSE	FALSE	FALSE	FALSE	FALSE	FALSE	FALSE	Secreted	0	3	CHEMBL3989977	EMAPALUMAB	TRUE	4	FALSE	KEGG	HIF-1 signaling pathway	3	1	0	1	1	1	1968.5
IFNG	ENSG00000111537	interferon gamma	1955	3	FALSE	FALSE	FALSE	FALSE	TRUE	FALSE	FALSE	FALSE	FALSE	FALSE	FALSE	FALSE	Secreted	0	3	CHEMBL2109450	AMG-811	FALSE	1	FALSE	Reactome	Interferon Signaling	3	1	0	1	1	1	1968.5
IFNG	ENSG00000111537	interferon gamma	1955	3	FALSE	FALSE	FALSE	FALSE	TRUE	FALSE	FALSE	FALSE	FALSE	FALSE	FALSE	FALSE	Secreted	0	3	CHEMBL3989977	EMAPALUMAB	TRUE	4	FALSE	Reactome	Interferon Signaling	3	1	0	1	1	1	1968.5
IFNG	ENSG00000111537	interferon gamma	1955	3	FALSE	FALSE	FALSE	FALSE	TRUE	FALSE	FALSE	FALSE	FALSE	FALSE	FALSE	FALSE	Secreted	0	3	CHEMBL2109450	AMG-811	FALSE	1	FALSE	KEGG	HIF-1 signaling pathway	3	1	0	1	1	1	1968.5
IFNG	ENSG00000111537	interferon gamma	1955	3	FALSE	FALSE	FALSE	FALSE	TRUE	FALSE	FALSE	FALSE	FALSE	FALSE	FALSE	FALSE	Secreted	0	3	CHEMBL3989977	EMAPALUMAB	TRUE	4	FALSE	KEGG	HIF-1 signaling pathway	3	1	0	1	1	1	1968.5
IFNG	ENSG00000111537	interferon gamma	1955	3	FALSE	FALSE	FALSE	FALSE	TRUE	FALSE	FALSE	FALSE	FALSE	FALSE	FALSE	FALSE	Secreted	0	3	CHEMBL3989977	EMAPALUMAB	TRUE	4	FALSE	Reactome	Interferon Signaling	3	1	0	1	1	1	1968.5
IFNG	ENSG00000111537	interferon gamma	1955	3	FALSE	FALSE	FALSE	FALSE	TRUE	FALSE	FALSE	FALSE	FALSE	FALSE	FALSE	FALSE	Secreted	0	3	CHEMBL3989977	EMAPALUMAB	TRUE	4	FALSE	Reactome	Cytokine Signaling in Immune system	3	1	0	1	1	1	1968.5
IFNG	ENSG00000111537	interferon gamma	1955	3	FALSE	FALSE	FALSE	FALSE	TRUE	FALSE	FALSE	FALSE	FALSE	FALSE	FALSE	FALSE	Secreted	0	3	CHEMBL3989977	EMAPALUMAB	TRUE	4	FALSE	Reactome	Cytokine Signaling in Immune system	3	1	0	1	1	1	1968.5
IFNG	ENSG00000111537	interferon gamma	1955	3	FALSE	FALSE	FALSE	FALSE	TRUE	FALSE	FALSE	FALSE	FALSE	FALSE	FALSE	FALSE	Secreted	0	3	CHEMBL2108459	FONTOLIZUMAB	FALSE	2	FALSE	KEGG	HIF-1 signaling pathway	3	1	0	1	1	1	1968.5
IFNG	ENSG00000111537	interferon gamma	1955	3	FALSE	FALSE	FALSE	FALSE	TRUE	FALSE	FALSE	FALSE	FALSE	FALSE	FALSE	FALSE	Secreted	0	3	CHEMBL3989977	EMAPALUMAB	TRUE	4	FALSE	KEGG	HIF-1 signaling pathway	3	1	0	1	1	1	1968.5
IFNG	ENSG00000111537	interferon gamma	1955	3	FALSE	FALSE	FALSE	FALSE	TRUE	FALSE	FALSE	FALSE	FALSE	FALSE	FALSE	FALSE	Secreted	0	3	CHEMBL3989977	EMAPALUMAB	TRUE	4	FALSE	KEGG	HIF-1 signaling pathway	3	1	0	1	1	1	1968.5
IFNG	ENSG00000111537	interferon gamma	1955	3	FALSE	FALSE	FALSE	FALSE	TRUE	FALSE	FALSE	FALSE	FALSE	FALSE	FALSE	FALSE	Secreted	0	3	CHEMBL2108459	FONTOLIZUMAB	FALSE	2	FALSE	Reactome	Cytokine Signaling in Immune system	3	1	0	1	1	1	1968.5
IFNG	ENSG00000111537	interferon gamma	1955	3	FALSE	FALSE	FALSE	FALSE	TRUE	FALSE	FALSE	FALSE	FALSE	FALSE	FALSE	FALSE	Secreted	0	3	CHEMBL3989977	EMAPALUMAB	TRUE	4	FALSE	Reactome	Cytokine Signaling in Immune system	3	1	0	1	1	1	1968.5
IFNG	ENSG00000111537	interferon gamma	1955	3	FALSE	FALSE	FALSE	FALSE	TRUE	FALSE	FALSE	FALSE	FALSE	FALSE	FALSE	FALSE	Secreted	0	3	CHEMBL3989977	EMAPALUMAB	TRUE	4	FALSE	Reactome	Interferon Signaling	3	1	0	1	1	1	1968.5
IFNG	ENSG00000111537	interferon gamma	1955	3	FALSE	FALSE	FALSE	FALSE	TRUE	FALSE	FALSE	FALSE	FALSE	FALSE	FALSE	FALSE	Secreted	0	3	CHEMBL3989977	EMAPALUMAB	TRUE	4	FALSE	Reactome	Interferon Signaling	3	1	0	1	1	1	1968.5
IFNG	ENSG00000111537	interferon gamma	1955	3	FALSE	FALSE	FALSE	FALSE	TRUE	FALSE	FALSE	FALSE	FALSE	FALSE	FALSE	FALSE	Secreted	0	3	CHEMBL2108459	FONTOLIZUMAB	FALSE	2	FALSE	Reactome	Interferon Signaling	3	1	0	1	1	1	1968.5
IFNG	ENSG00000111537	interferon gamma	1955	3	FALSE	FALSE	FALSE	FALSE	TRUE	FALSE	FALSE	FALSE	FALSE	FALSE	FALSE	FALSE	Secreted	0	3	CHEMBL3989977	EMAPALUMAB	TRUE	4	FALSE	KEGG	HIF-1 signaling pathway	3	1	0	1	1	1	1968.5
IFNG	ENSG00000111537	interferon gamma	1955	3	FALSE	FALSE	FALSE	FALSE	TRUE	FALSE	FALSE	FALSE	FALSE	FALSE	FALSE	FALSE	Secreted	0	3	CHEMBL3989977	EMAPALUMAB	TRUE	4	FALSE	KEGG	HIF-1 signaling pathway	3	1	0	1	1	1	1968.5
IFNG	ENSG00000111537	interferon gamma	1955	3	FALSE	FALSE	FALSE	FALSE	TRUE	FALSE	FALSE	FALSE	FALSE	FALSE	FALSE	FALSE	Secreted	0	3	CHEMBL3989977	EMAPALUMAB	TRUE	4	FALSE	KEGG	HIF-1 signaling pathway	3	1	0	1	1	1	1968.5
IFNG	ENSG00000111537	interferon gamma	1955	3	FALSE	FALSE	FALSE	FALSE	TRUE	FALSE	FALSE	FALSE	FALSE	FALSE	FALSE	FALSE	Secreted	0	3	CHEMBL3989977	EMAPALUMAB	TRUE	4	FALSE	Reactome	Interferon Signaling	3	1	0	1	1	1	1968.5
IFNG	ENSG00000111537	interferon gamma	1955	3	FALSE	FALSE	FALSE	FALSE	TRUE	FALSE	FALSE	FALSE	FALSE	FALSE	FALSE	FALSE	Secreted	0	3	CHEMBL3989977	EMAPALUMAB	TRUE	4	FALSE	Reactome	Cytokine Signaling in Immune system	3	1	0	1	1	1	1968.5
IFNG	ENSG00000111537	interferon gamma	1955	3	FALSE	FALSE	FALSE	FALSE	TRUE	FALSE	FALSE	FALSE	FALSE	FALSE	FALSE	FALSE	Secreted	0	3	CHEMBL3989977	EMAPALUMAB	TRUE	4	FALSE	Reactome	Cytokine Signaling in Immune system	3	1	0	1	1	1	1968.5
IFNG	ENSG00000111537	interferon gamma	1955	3	FALSE	FALSE	FALSE	FALSE	TRUE	FALSE	FALSE	FALSE	FALSE	FALSE	FALSE	FALSE	Secreted	0	3	CHEMBL3989977	EMAPALUMAB	TRUE	4	FALSE	KEGG	HIF-1 signaling pathway	3	1	0	1	1	1	1968.5
IFNG	ENSG00000111537	interferon gamma	1955	3	FALSE	FALSE	FALSE	FALSE	TRUE	FALSE	FALSE	FALSE	FALSE	FALSE	FALSE	FALSE	Secreted	0	3	CHEMBL3989977	EMAPALUMAB	TRUE	4	FALSE	Reactome	Interferon Signaling	3	1	0	1	1	1	1968.5
IFNG	ENSG00000111537	interferon gamma	1955	3	FALSE	FALSE	FALSE	FALSE	TRUE	FALSE	FALSE	FALSE	FALSE	FALSE	FALSE	FALSE	Secreted	0	3	CHEMBL3989977	EMAPALUMAB	TRUE	4	FALSE	Reactome	Interferon Signaling	3	1	0	1	1	1	1968.5
IFNG	ENSG00000111537	interferon gamma	1955	3	FALSE	FALSE	FALSE	FALSE	TRUE	FALSE	FALSE	FALSE	FALSE	FALSE	FALSE	FALSE	Secreted	0	3	CHEMBL3989977	EMAPALUMAB	TRUE	4	FALSE	KEGG	HIF-1 signaling pathway	3	1	0	1	1	1	1968.5
IFNG	ENSG00000111537	interferon gamma	1955	3	FALSE	FALSE	FALSE	FALSE	TRUE	FALSE	FALSE	FALSE	FALSE	FALSE	FALSE	FALSE	Secreted	0	3	CHEMBL3989977	EMAPALUMAB	TRUE	4	FALSE	Reactome	Interferon Signaling	3	1	0	1	1	1	1968.5
IFNG	ENSG00000111537	interferon gamma	1955	3	FALSE	FALSE	FALSE	FALSE	TRUE	FALSE	FALSE	FALSE	FALSE	FALSE	FALSE	FALSE	Secreted	0	3	CHEMBL3989977	EMAPALUMAB	TRUE	4	FALSE	Reactome	Cytokine Signaling in Immune system	3	1	0	1	1	1	1968.5
IFNG	ENSG00000111537	interferon gamma	1955	3	FALSE	FALSE	FALSE	FALSE	TRUE	FALSE	FALSE	FALSE	FALSE	FALSE	FALSE	FALSE	Secreted	0	3	CHEMBL3989977	EMAPALUMAB	TRUE	4	FALSE	Reactome	Cytokine Signaling in Immune system	3	1	0	1	1	1	1968.5
IFNG	ENSG00000111537	interferon gamma	1955	3	FALSE	FALSE	FALSE	FALSE	TRUE	FALSE	FALSE	FALSE	FALSE	FALSE	FALSE	FALSE	Secreted	0	3	CHEMBL3989977	EMAPALUMAB	TRUE	4	FALSE	Reactome	Interferon Signaling	3	1	0	1	1	1	1968.5
IFNG	ENSG00000111537	interferon gamma	1955	3	FALSE	FALSE	FALSE	FALSE	TRUE	FALSE	FALSE	FALSE	FALSE	FALSE	FALSE	FALSE	Secreted	0	3	CHEMBL3989977	EMAPALUMAB	TRUE	4	FALSE	Reactome	Cytokine Signaling in Immune system	3	1	0	1	1	1	1968.5
IFNG	ENSG00000111537	interferon gamma	1955	3	FALSE	FALSE	FALSE	FALSE	TRUE	FALSE	FALSE	FALSE	FALSE	FALSE	FALSE	FALSE	Secreted	0	3	CHEMBL3989977	EMAPALUMAB	TRUE	4	FALSE	Reactome	Cytokine Signaling in Immune system	3	1	0	1	1	1	1968.5
IFNG	ENSG00000111537	interferon gamma	1955	3	FALSE	FALSE	FALSE	FALSE	TRUE	FALSE	FALSE	FALSE	FALSE	FALSE	FALSE	FALSE	Secreted	0	3	CHEMBL3989977	EMAPALUMAB	TRUE	4	FALSE	KEGG	HIF-1 signaling pathway	3	1	0	1	1	1	1968.5
IFNG	ENSG00000111537	interferon gamma	1955	3	FALSE	FALSE	FALSE	FALSE	TRUE	FALSE	FALSE	FALSE	FALSE	FALSE	FALSE	FALSE	Secreted	0	3	CHEMBL3989977	EMAPALUMAB	TRUE	4	FALSE	Reactome	Interferon Signaling	3	1	0	1	1	1	1968.5
IFNG	ENSG00000111537	interferon gamma	1955	3	FALSE	FALSE	FALSE	FALSE	TRUE	FALSE	FALSE	FALSE	FALSE	FALSE	FALSE	FALSE	Secreted	0	3	CHEMBL3989977	EMAPALUMAB	TRUE	4	FALSE	Reactome	Interferon Signaling	3	1	0	1	1	1	1968.5
EGFR	ENSG00000146648	epidermal growth factor receptor	1839	7	TRUE	FALSE	FALSE	TRUE	TRUE	FALSE	FALSE	FALSE	FALSE	FALSE	TRUE	FALSE	Cell membrane	2	72	CHEMBL3353410	OSIMERTINIB	TRUE	4	FALSE	KEGG	HIF-1 signaling pathway	1	14	2	0	0	14	1960
EGFR	ENSG00000146648	epidermal growth factor receptor	1839	7	TRUE	FALSE	FALSE	TRUE	TRUE	FALSE	FALSE	FALSE	FALSE	FALSE	TRUE	FALSE	Cell membrane	2	72	CHEMBL1173655	AFATINIB	TRUE	4	FALSE	KEGG	HIF-1 signaling pathway	1	14	2	0	0	14	1960
EGFR	ENSG00000146648	epidermal growth factor receptor	1839	7	TRUE	FALSE	FALSE	TRUE	TRUE	FALSE	FALSE	FALSE	FALSE	FALSE	TRUE	FALSE	Cell membrane	2	72	CHEMBL1201577	CETUXIMAB	TRUE	4	FALSE	KEGG	HIF-1 signaling pathway	1	14	2	0	0	14	1960
EGFR	ENSG00000146648	epidermal growth factor receptor	1839	7	TRUE	FALSE	FALSE	TRUE	TRUE	FALSE	FALSE	FALSE	FALSE	FALSE	TRUE	FALSE	Cell membrane	2	72	CHEMBL1201577	CETUXIMAB	TRUE	4	FALSE	KEGG	HIF-1 signaling pathway	1	14	2	0	0	14	1960
EGFR	ENSG00000146648	epidermal growth factor receptor	1839	7	TRUE	FALSE	FALSE	TRUE	TRUE	FALSE	FALSE	FALSE	FALSE	FALSE	TRUE	FALSE	Cell membrane	2	72	CHEMBL2110732	DACOMITINIB	TRUE	4	FALSE	KEGG	HIF-1 signaling pathway	1	14	2	0	0	14	1960
EGFR	ENSG00000146648	epidermal growth factor receptor	1839	7	TRUE	FALSE	FALSE	TRUE	TRUE	FALSE	FALSE	FALSE	FALSE	FALSE	TRUE	FALSE	Cell membrane	2	72	CHEMBL2108359	NIMOTUZUMAB	FALSE	3	FALSE	KEGG	HIF-1 signaling pathway	1	14	2	0	0	14	1960
EGFR	ENSG00000146648	epidermal growth factor receptor	1839	7	TRUE	FALSE	FALSE	TRUE	TRUE	FALSE	FALSE	FALSE	FALSE	FALSE	TRUE	FALSE	Cell membrane	2	72	CHEMBL4297774	AMIVANTAMAB	TRUE	4	FALSE	KEGG	HIF-1 signaling pathway	1	14	2	0	0	14	1960
EGFR	ENSG00000146648	epidermal growth factor receptor	1839	7	TRUE	FALSE	FALSE	TRUE	TRUE	FALSE	FALSE	FALSE	FALSE	FALSE	TRUE	FALSE	Cell membrane	2	72	CHEMBL1173655	AFATINIB	TRUE	4	FALSE	KEGG	HIF-1 signaling pathway	1	14	2	0	0	14	1960
EGFR	ENSG00000146648	epidermal growth factor receptor	1839	7	TRUE	FALSE	FALSE	TRUE	TRUE	FALSE	FALSE	FALSE	FALSE	FALSE	TRUE	FALSE	Cell membrane	2	72	CHEMBL554	LAPATINIB	TRUE	4	FALSE	KEGG	HIF-1 signaling pathway	1	14	2	0	0	14	1960
EGFR	ENSG00000146648	epidermal growth factor receptor	1839	7	TRUE	FALSE	FALSE	TRUE	TRUE	FALSE	FALSE	FALSE	FALSE	FALSE	TRUE	FALSE	Cell membrane	2	72	CHEMBL2105719	DACOMITINIB	TRUE	4	FALSE	KEGG	HIF-1 signaling pathway	1	14	2	0	0	14	1960
EGFR	ENSG00000146648	epidermal growth factor receptor	1839	7	TRUE	FALSE	FALSE	TRUE	TRUE	FALSE	FALSE	FALSE	FALSE	FALSE	TRUE	FALSE	Cell membrane	2	72	CHEMBL1201577	CETUXIMAB	TRUE	4	FALSE	KEGG	HIF-1 signaling pathway	1	14	2	0	0	14	1960
EGFR	ENSG00000146648	epidermal growth factor receptor	1839	7	TRUE	FALSE	FALSE	TRUE	TRUE	FALSE	FALSE	FALSE	FALSE	FALSE	TRUE	FALSE	Cell membrane	2	72	CHEMBL553	ERLOTINIB	TRUE	4	FALSE	KEGG	HIF-1 signaling pathway	1	14	2	0	0	14	1960
EGFR	ENSG00000146648	epidermal growth factor receptor	1839	7	TRUE	FALSE	FALSE	TRUE	TRUE	FALSE	FALSE	FALSE	FALSE	FALSE	TRUE	FALSE	Cell membrane	2	72	CHEMBL939	GEFITINIB	TRUE	4	FALSE	KEGG	HIF-1 signaling pathway	1	14	2	0	0	14	1960
EGFR	ENSG00000146648	epidermal growth factor receptor	1839	7	TRUE	FALSE	FALSE	TRUE	TRUE	FALSE	FALSE	FALSE	FALSE	FALSE	TRUE	FALSE	Cell membrane	2	72	CHEMBL553	ERLOTINIB	TRUE	4	FALSE	KEGG	HIF-1 signaling pathway	1	14	2	0	0	14	1960
EGFR	ENSG00000146648	epidermal growth factor receptor	1839	7	TRUE	FALSE	FALSE	TRUE	TRUE	FALSE	FALSE	FALSE	FALSE	FALSE	TRUE	FALSE	Cell membrane	2	72	CHEMBL554	LAPATINIB	TRUE	4	FALSE	KEGG	HIF-1 signaling pathway	1	14	2	0	0	14	1960
EGFR	ENSG00000146648	epidermal growth factor receptor	1839	7	TRUE	FALSE	FALSE	TRUE	TRUE	FALSE	FALSE	FALSE	FALSE	FALSE	TRUE	FALSE	Cell membrane	2	72	CHEMBL1201827	PANITUMUMAB	TRUE	4	FALSE	KEGG	HIF-1 signaling pathway	1	14	2	0	0	14	1960
EGFR	ENSG00000146648	epidermal growth factor receptor	1839	7	TRUE	FALSE	FALSE	TRUE	TRUE	FALSE	FALSE	FALSE	FALSE	FALSE	TRUE	FALSE	Cell membrane	2	72	CHEMBL1201179	LAPATINIB DITOSYLATE	TRUE	4	FALSE	KEGG	HIF-1 signaling pathway	1	14	2	0	0	14	1960
EGFR	ENSG00000146648	epidermal growth factor receptor	1839	7	TRUE	FALSE	FALSE	TRUE	TRUE	FALSE	FALSE	FALSE	FALSE	FALSE	TRUE	FALSE	Cell membrane	2	72	CHEMBL3545311	BRIGATINIB	TRUE	4	FALSE	KEGG	HIF-1 signaling pathway	1	14	2	0	0	14	1960
EGFR	ENSG00000146648	epidermal growth factor receptor	1839	7	TRUE	FALSE	FALSE	TRUE	TRUE	FALSE	FALSE	FALSE	FALSE	FALSE	TRUE	FALSE	Cell membrane	2	72	CHEMBL1743047	NECITUMUMAB	TRUE	4	FALSE	KEGG	HIF-1 signaling pathway	1	14	2	0	0	14	1960
EGFR	ENSG00000146648	epidermal growth factor receptor	1839	7	TRUE	FALSE	FALSE	TRUE	TRUE	FALSE	FALSE	FALSE	FALSE	FALSE	TRUE	FALSE	Cell membrane	2	72	CHEMBL1079742	ERLOTINIB HYDROCHLORIDE	TRUE	4	FALSE	KEGG	HIF-1 signaling pathway	1	14	2	0	0	14	1960
EGFR	ENSG00000146648	epidermal growth factor receptor	1839	7	TRUE	FALSE	FALSE	TRUE	TRUE	FALSE	FALSE	FALSE	FALSE	FALSE	TRUE	FALSE	Cell membrane	2	72	CHEMBL1201577	CETUXIMAB	TRUE	4	FALSE	KEGG	HIF-1 signaling pathway	1	14	2	0	0	14	1960
EGFR	ENSG00000146648	epidermal growth factor receptor	1839	7	TRUE	FALSE	FALSE	TRUE	TRUE	FALSE	FALSE	FALSE	FALSE	FALSE	TRUE	FALSE	Cell membrane	2	72	CHEMBL939	GEFITINIB	TRUE	4	FALSE	KEGG	HIF-1 signaling pathway	1	14	2	0	0	14	1960
EGFR	ENSG00000146648	epidermal growth factor receptor	1839	7	TRUE	FALSE	FALSE	TRUE	TRUE	FALSE	FALSE	FALSE	FALSE	FALSE	TRUE	FALSE	Cell membrane	2	72	CHEMBL553	ERLOTINIB	TRUE	4	FALSE	KEGG	HIF-1 signaling pathway	1	14	2	0	0	14	1960
EGFR	ENSG00000146648	epidermal growth factor receptor	1839	7	TRUE	FALSE	FALSE	TRUE	TRUE	FALSE	FALSE	FALSE	FALSE	FALSE	TRUE	FALSE	Cell membrane	2	72	CHEMBL2087361	ICOTINIB	FALSE	3	FALSE	KEGG	HIF-1 signaling pathway	1	14	2	0	0	14	1960
EGFR	ENSG00000146648	epidermal growth factor receptor	1839	7	TRUE	FALSE	FALSE	TRUE	TRUE	FALSE	FALSE	FALSE	FALSE	FALSE	TRUE	FALSE	Cell membrane	2	72	CHEMBL180022	NERATINIB	TRUE	4	FALSE	KEGG	HIF-1 signaling pathway	1	14	2	0	0	14	1960
NFKB1	ENSG00000109320	nuclear factor kappa B subunit 1	1773	3	FALSE	TRUE	FALSE	TRUE	FALSE	FALSE	FALSE	FALSE	FALSE	FALSE	FALSE	FALSE	Nucleus	1	1	CHEMBL3786673	EDASALONEXENT	FALSE	3	FALSE	Reactome	Cytokine Signaling in Immune system	2	0	1	0	0	0	1778.5
NFKB1	ENSG00000109320	nuclear factor kappa B subunit 1	1773	3	FALSE	TRUE	FALSE	TRUE	FALSE	FALSE	FALSE	FALSE	FALSE	FALSE	FALSE	FALSE	Nucleus	1	1	CHEMBL3786673	EDASALONEXENT	FALSE	3	FALSE	Reactome	Cytokine Signaling in Immune system	2	0	1	0	0	0	1778.5
NFKB1	ENSG00000109320	nuclear factor kappa B subunit 1	1773	3	FALSE	TRUE	FALSE	TRUE	FALSE	FALSE	FALSE	FALSE	FALSE	FALSE	FALSE	FALSE	Nucleus	1	1	CHEMBL3786673	EDASALONEXENT	FALSE	3	FALSE	KEGG	HIF-1 signaling pathway	2	0	1	0	0	0	1778.5
NFKB1	ENSG00000109320	nuclear factor kappa B subunit 1	1773	3	FALSE	TRUE	FALSE	TRUE	FALSE	FALSE	FALSE	FALSE	FALSE	FALSE	FALSE	FALSE	Nucleus	1	1	CHEMBL3786673	EDASALONEXENT	FALSE	3	FALSE	Reactome	Cytokine Signaling in Immune system	2	0	1	0	0	0	1778.5
NFKB1	ENSG00000109320	nuclear factor kappa B subunit 1	1773	3	FALSE	TRUE	FALSE	TRUE	FALSE	FALSE	FALSE	FALSE	FALSE	FALSE	FALSE	FALSE	Nucleus	1	1	CHEMBL3786673	EDASALONEXENT	FALSE	3	FALSE	KEGG	HIF-1 signaling pathway	2	0	1	0	0	0	1778.5
NFKB1	ENSG00000109320	nuclear factor kappa B subunit 1	1773	3	FALSE	TRUE	FALSE	TRUE	FALSE	FALSE	FALSE	FALSE	FALSE	FALSE	FALSE	FALSE	Nucleus	1	1	CHEMBL3786673	EDASALONEXENT	FALSE	3	FALSE	KEGG	HIF-1 signaling pathway	2	0	1	0	0	0	1778.5
NFKB1	ENSG00000109320	nuclear factor kappa B subunit 1	1773	3	FALSE	TRUE	FALSE	TRUE	FALSE	FALSE	FALSE	FALSE	FALSE	FALSE	FALSE	FALSE	Nucleus	1	1	CHEMBL3786673	EDASALONEXENT	FALSE	3	FALSE	Reactome	Cytokine Signaling in Immune system	2	0	1	0	0	0	1778.5
NFKB1	ENSG00000109320	nuclear factor kappa B subunit 1	1773	3	FALSE	TRUE	FALSE	TRUE	FALSE	FALSE	FALSE	FALSE	FALSE	FALSE	FALSE	FALSE	Nucleus	1	1	CHEMBL3786673	EDASALONEXENT	FALSE	3	FALSE	KEGG	HIF-1 signaling pathway	2	0	1	0	0	0	1778.5
ESR1	ENSG00000091831	estrogen receptor 1	1695	6	TRUE	FALSE	FALSE	TRUE	FALSE	FALSE	FALSE	TRUE	FALSE	FALSE	FALSE	FALSE	[Isoform 1]: Nucleus	7	41	CHEMBL135	ESTRADIOL	TRUE	4	FALSE	Reactome	SUMOylation	2	14	0	0	0	14	1772
ESR1	ENSG00000091831	estrogen receptor 1	1695	6	TRUE	FALSE	FALSE	TRUE	FALSE	FALSE	FALSE	TRUE	FALSE	FALSE	FALSE	FALSE	[Isoform 1]: Nucleus	7	41	CHEMBL1511	ESTRADIOL VALERATE	TRUE	4	FALSE	Reactome	SUMOylation	2	14	0	0	0	14	1772
ESR1	ENSG00000091831	estrogen receptor 1	1695	6	TRUE	FALSE	FALSE	TRUE	FALSE	FALSE	FALSE	TRUE	FALSE	FALSE	FALSE	FALSE	[Isoform 1]: Nucleus	7	41	CHEMBL1511	ESTRADIOL VALERATE	TRUE	4	FALSE	Reactome	SUMOylation	2	14	0	0	0	14	1772
ESR1	ENSG00000091831	estrogen receptor 1	1695	6	TRUE	FALSE	FALSE	TRUE	FALSE	FALSE	FALSE	TRUE	FALSE	FALSE	FALSE	FALSE	[Isoform 1]: Nucleus	7	41	CHEMBL83	TAMOXIFEN	TRUE	4	FALSE	Reactome	SUMOylation	2	14	0	0	0	14	1772
ESR1	ENSG00000091831	estrogen receptor 1	1695	6	TRUE	FALSE	FALSE	TRUE	FALSE	FALSE	FALSE	TRUE	FALSE	FALSE	FALSE	FALSE	[Isoform 1]: Nucleus	7	41	CHEMBL135	ESTRADIOL	TRUE	4	FALSE	Reactome	SUMOylation	2	14	0	0	0	14	1772
ESR1	ENSG00000091831	estrogen receptor 1	1695	6	TRUE	FALSE	FALSE	TRUE	FALSE	FALSE	FALSE	TRUE	FALSE	FALSE	FALSE	FALSE	[Isoform 1]: Nucleus	7	41	CHEMBL786	TAMOXIFEN CITRATE	TRUE	4	FALSE	Reactome	SUMOylation	2	14	0	0	0	14	1772
ESR1	ENSG00000091831	estrogen receptor 1	1695	6	TRUE	FALSE	FALSE	TRUE	FALSE	FALSE	FALSE	TRUE	FALSE	FALSE	FALSE	FALSE	[Isoform 1]: Nucleus	7	41	CHEMBL1200675	TOREMIFENE CITRATE	TRUE	4	FALSE	Reactome	SUMOylation	2	14	0	0	0	14	1772
ESR1	ENSG00000091831	estrogen receptor 1	1695	6	TRUE	FALSE	FALSE	TRUE	FALSE	FALSE	FALSE	TRUE	FALSE	FALSE	FALSE	FALSE	[Isoform 1]: Nucleus	7	41	CHEMBL135	ESTRADIOL	TRUE	4	FALSE	Reactome	SUMOylation	2	14	0	0	0	14	1772
ESR1	ENSG00000091831	estrogen receptor 1	1695	6	TRUE	FALSE	FALSE	TRUE	FALSE	FALSE	FALSE	TRUE	FALSE	FALSE	FALSE	FALSE	[Isoform 1]: Nucleus	7	41	CHEMBL1201466	ESTROGENS, CONJUGATED SYNTHETIC A	TRUE	4	FALSE	Reactome	SUMOylation	2	14	0	0	0	14	1772
ESR1	ENSG00000091831	estrogen receptor 1	1695	6	TRUE	FALSE	FALSE	TRUE	FALSE	FALSE	FALSE	TRUE	FALSE	FALSE	FALSE	FALSE	[Isoform 1]: Nucleus	7	41	CHEMBL1200973	ESTRADIOL CYPIONATE	TRUE	4	FALSE	Reactome	SUMOylation	2	14	0	0	0	14	1772
ESR1	ENSG00000091831	estrogen receptor 1	1695	6	TRUE	FALSE	FALSE	TRUE	FALSE	FALSE	FALSE	TRUE	FALSE	FALSE	FALSE	FALSE	[Isoform 1]: Nucleus	7	41	CHEMBL1200973	ESTRADIOL CYPIONATE	TRUE	4	FALSE	Reactome	SUMOylation	2	14	0	0	0	14	1772
ESR1	ENSG00000091831	estrogen receptor 1	1695	6	TRUE	FALSE	FALSE	TRUE	FALSE	FALSE	FALSE	TRUE	FALSE	FALSE	FALSE	FALSE	[Isoform 1]: Nucleus	7	41	CHEMBL1200973	ESTRADIOL CYPIONATE	TRUE	4	FALSE	Reactome	SUMO E3 ligases SUMOylate target proteins	2	14	0	0	0	14	1772
ESR1	ENSG00000091831	estrogen receptor 1	1695	6	TRUE	FALSE	FALSE	TRUE	FALSE	FALSE	FALSE	TRUE	FALSE	FALSE	FALSE	FALSE	[Isoform 1]: Nucleus	7	41	CHEMBL786	TAMOXIFEN CITRATE	TRUE	4	FALSE	Reactome	SUMOylation	2	14	0	0	0	14	1772
ESR1	ENSG00000091831	estrogen receptor 1	1695	6	TRUE	FALSE	FALSE	TRUE	FALSE	FALSE	FALSE	TRUE	FALSE	FALSE	FALSE	FALSE	[Isoform 1]: Nucleus	7	41	CHEMBL2105395	OSPEMIFENE	TRUE	4	FALSE	Reactome	SUMOylation	2	14	0	0	0	14	1772
ESR1	ENSG00000091831	estrogen receptor 1	1695	6	TRUE	FALSE	FALSE	TRUE	FALSE	FALSE	FALSE	TRUE	FALSE	FALSE	FALSE	FALSE	[Isoform 1]: Nucleus	7	41	CHEMBL691	ETHINYL ESTRADIOL	TRUE	4	FALSE	Reactome	SUMOylation	2	14	0	0	0	14	1772
ESR1	ENSG00000091831	estrogen receptor 1	1695	6	TRUE	FALSE	FALSE	TRUE	FALSE	FALSE	FALSE	TRUE	FALSE	FALSE	FALSE	FALSE	[Isoform 1]: Nucleus	7	41	CHEMBL786	TAMOXIFEN CITRATE	TRUE	4	FALSE	Reactome	SUMO E3 ligases SUMOylate target proteins	2	14	0	0	0	14	1772
ESR1	ENSG00000091831	estrogen receptor 1	1695	6	TRUE	FALSE	FALSE	TRUE	FALSE	FALSE	FALSE	TRUE	FALSE	FALSE	FALSE	FALSE	[Isoform 1]: Nucleus	7	41	CHEMBL135	ESTRADIOL	TRUE	4	FALSE	Reactome	SUMOylation	2	14	0	0	0	14	1772
ESR1	ENSG00000091831	estrogen receptor 1	1695	6	TRUE	FALSE	FALSE	TRUE	FALSE	FALSE	FALSE	TRUE	FALSE	FALSE	FALSE	FALSE	[Isoform 1]: Nucleus	7	41	CHEMBL2355051	CLOMIPHENE	TRUE	4	FALSE	Reactome	SUMOylation	2	14	0	0	0	14	1772
ESR1	ENSG00000091831	estrogen receptor 1	1695	6	TRUE	FALSE	FALSE	TRUE	FALSE	FALSE	FALSE	TRUE	FALSE	FALSE	FALSE	FALSE	[Isoform 1]: Nucleus	7	41	CHEMBL1358	FULVESTRANT	TRUE	4	FALSE	Reactome	SUMOylation	2	14	0	0	0	14	1772
ESR1	ENSG00000091831	estrogen receptor 1	1695	6	TRUE	FALSE	FALSE	TRUE	FALSE	FALSE	FALSE	TRUE	FALSE	FALSE	FALSE	FALSE	[Isoform 1]: Nucleus	7	41	CHEMBL1200430	ESTRADIOL ACETATE	TRUE	4	FALSE	Reactome	SUMOylation	2	14	0	0	0	14	1772
ESR1	ENSG00000091831	estrogen receptor 1	1695	6	TRUE	FALSE	FALSE	TRUE	FALSE	FALSE	FALSE	TRUE	FALSE	FALSE	FALSE	FALSE	[Isoform 1]: Nucleus	7	41	CHEMBL2355051	CLOMIPHENE	TRUE	4	FALSE	Reactome	SUMOylation	2	14	0	0	0	14	1772
ESR1	ENSG00000091831	estrogen receptor 1	1695	6	TRUE	FALSE	FALSE	TRUE	FALSE	FALSE	FALSE	TRUE	FALSE	FALSE	FALSE	FALSE	[Isoform 1]: Nucleus	7	41	CHEMBL786	TAMOXIFEN CITRATE	TRUE	4	FALSE	Reactome	SUMO E3 ligases SUMOylate target proteins	2	14	0	0	0	14	1772
ESR1	ENSG00000091831	estrogen receptor 1	1695	6	TRUE	FALSE	FALSE	TRUE	FALSE	FALSE	FALSE	TRUE	FALSE	FALSE	FALSE	FALSE	[Isoform 1]: Nucleus	7	41	CHEMBL2355051	CLOMIPHENE	TRUE	4	FALSE	Reactome	SUMO E3 ligases SUMOylate target proteins	2	14	0	0	0	14	1772
ESR1	ENSG00000091831	estrogen receptor 1	1695	6	TRUE	FALSE	FALSE	TRUE	FALSE	FALSE	FALSE	TRUE	FALSE	FALSE	FALSE	FALSE	[Isoform 1]: Nucleus	7	41	CHEMBL1201466	ESTROGENS, CONJUGATED SYNTHETIC A	TRUE	4	FALSE	Reactome	SUMO E3 ligases SUMOylate target proteins	2	14	0	0	0	14	1772
ESR1	ENSG00000091831	estrogen receptor 1	1695	6	TRUE	FALSE	FALSE	TRUE	FALSE	FALSE	FALSE	TRUE	FALSE	FALSE	FALSE	FALSE	[Isoform 1]: Nucleus	7	41	CHEMBL135	ESTRADIOL	TRUE	4	FALSE	Reactome	SUMO E3 ligases SUMOylate target proteins	2	14	0	0	0	14	1772
ESR1	ENSG00000091831	estrogen receptor 1	1695	6	TRUE	FALSE	FALSE	TRUE	FALSE	FALSE	FALSE	TRUE	FALSE	FALSE	FALSE	FALSE	[Isoform 1]: Nucleus	7	41	CHEMBL135	ESTRADIOL	TRUE	4	FALSE	Reactome	SUMO E3 ligases SUMOylate target proteins	2	14	0	0	0	14	1772
ESR1	ENSG00000091831	estrogen receptor 1	1695	6	TRUE	FALSE	FALSE	TRUE	FALSE	FALSE	FALSE	TRUE	FALSE	FALSE	FALSE	FALSE	[Isoform 1]: Nucleus	7	41	CHEMBL1201466	ESTROGENS, CONJUGATED SYNTHETIC A	TRUE	4	FALSE	Reactome	SUMOylation	2	14	0	0	0	14	1772
ESR1	ENSG00000091831	estrogen receptor 1	1695	6	TRUE	FALSE	FALSE	TRUE	FALSE	FALSE	FALSE	TRUE	FALSE	FALSE	FALSE	FALSE	[Isoform 1]: Nucleus	7	41	CHEMBL1201477	POLYESTRADIOL PHOSPHATE	TRUE	4	FALSE	Reactome	SUMO E3 ligases SUMOylate target proteins	2	14	0	0	0	14	1772
ESR1	ENSG00000091831	estrogen receptor 1	1695	6	TRUE	FALSE	FALSE	TRUE	FALSE	FALSE	FALSE	TRUE	FALSE	FALSE	FALSE	FALSE	[Isoform 1]: Nucleus	7	41	CHEMBL2355051	CLOMIPHENE	TRUE	4	FALSE	Reactome	SUMO E3 ligases SUMOylate target proteins	2	14	0	0	0	14	1772
ESR1	ENSG00000091831	estrogen receptor 1	1695	6	TRUE	FALSE	FALSE	TRUE	FALSE	FALSE	FALSE	TRUE	FALSE	FALSE	FALSE	FALSE	[Isoform 1]: Nucleus	7	41	CHEMBL1201466	ESTROGENS, CONJUGATED SYNTHETIC A	TRUE	4	FALSE	Reactome	SUMO E3 ligases SUMOylate target proteins	2	14	0	0	0	14	1772
ESR1	ENSG00000091831	estrogen receptor 1	1695	6	TRUE	FALSE	FALSE	TRUE	FALSE	FALSE	FALSE	TRUE	FALSE	FALSE	FALSE	FALSE	[Isoform 1]: Nucleus	7	41	CHEMBL1201477	POLYESTRADIOL PHOSPHATE	TRUE	4	FALSE	Reactome	SUMOylation	2	14	0	0	0	14	1772
ESR1	ENSG00000091831	estrogen receptor 1	1695	6	TRUE	FALSE	FALSE	TRUE	FALSE	FALSE	FALSE	TRUE	FALSE	FALSE	FALSE	FALSE	[Isoform 1]: Nucleus	7	41	CHEMBL1511	ESTRADIOL VALERATE	TRUE	4	FALSE	Reactome	SUMO E3 ligases SUMOylate target proteins	2	14	0	0	0	14	1772
ESR1	ENSG00000091831	estrogen receptor 1	1695	6	TRUE	FALSE	FALSE	TRUE	FALSE	FALSE	FALSE	TRUE	FALSE	FALSE	FALSE	FALSE	[Isoform 1]: Nucleus	7	41	CHEMBL786	TAMOXIFEN CITRATE	TRUE	4	FALSE	Reactome	SUMOylation	2	14	0	0	0	14	1772
ESR1	ENSG00000091831	estrogen receptor 1	1695	6	TRUE	FALSE	FALSE	TRUE	FALSE	FALSE	FALSE	TRUE	FALSE	FALSE	FALSE	FALSE	[Isoform 1]: Nucleus	7	41	CHEMBL135	ESTRADIOL	TRUE	4	FALSE	Reactome	SUMO E3 ligases SUMOylate target proteins	2	14	0	0	0	14	1772
ESR1	ENSG00000091831	estrogen receptor 1	1695	6	TRUE	FALSE	FALSE	TRUE	FALSE	FALSE	FALSE	TRUE	FALSE	FALSE	FALSE	FALSE	[Isoform 1]: Nucleus	7	41	CHEMBL691	ETHINYL ESTRADIOL	TRUE	4	FALSE	Reactome	SUMO E3 ligases SUMOylate target proteins	2	14	0	0	0	14	1772
ESR1	ENSG00000091831	estrogen receptor 1	1695	6	TRUE	FALSE	FALSE	TRUE	FALSE	FALSE	FALSE	TRUE	FALSE	FALSE	FALSE	FALSE	[Isoform 1]: Nucleus	7	41	CHEMBL1358	FULVESTRANT	TRUE	4	FALSE	Reactome	SUMO E3 ligases SUMOylate target proteins	2	14	0	0	0	14	1772
ESR1	ENSG00000091831	estrogen receptor 1	1695	6	TRUE	FALSE	FALSE	TRUE	FALSE	FALSE	FALSE	TRUE	FALSE	FALSE	FALSE	FALSE	[Isoform 1]: Nucleus	7	41	CHEMBL135	ESTRADIOL	TRUE	4	FALSE	Reactome	SUMO E3 ligases SUMOylate target proteins	2	14	0	0	0	14	1772
ESR1	ENSG00000091831	estrogen receptor 1	1695	6	TRUE	FALSE	FALSE	TRUE	FALSE	FALSE	FALSE	TRUE	FALSE	FALSE	FALSE	FALSE	[Isoform 1]: Nucleus	7	41	CHEMBL411	DIETHYLSTILBESTROL	TRUE	4	TRUE	Reactome	SUMOylation	2	14	0	0	0	14	1772
ESR1	ENSG00000091831	estrogen receptor 1	1695	6	TRUE	FALSE	FALSE	TRUE	FALSE	FALSE	FALSE	TRUE	FALSE	FALSE	FALSE	FALSE	[Isoform 1]: Nucleus	7	41	CHEMBL135	ESTRADIOL	TRUE	4	FALSE	Reactome	SUMOylation	2	14	0	0	0	14	1772
ESR1	ENSG00000091831	estrogen receptor 1	1695	6	TRUE	FALSE	FALSE	TRUE	FALSE	FALSE	FALSE	TRUE	FALSE	FALSE	FALSE	FALSE	[Isoform 1]: Nucleus	7	41	CHEMBL2105395	OSPEMIFENE	TRUE	4	FALSE	Reactome	SUMO E3 ligases SUMOylate target proteins	2	14	0	0	0	14	1772
ESR1	ENSG00000091831	estrogen receptor 1	1695	6	TRUE	FALSE	FALSE	TRUE	FALSE	FALSE	FALSE	TRUE	FALSE	FALSE	FALSE	FALSE	[Isoform 1]: Nucleus	7	41	CHEMBL83	TAMOXIFEN	TRUE	4	FALSE	Reactome	SUMO E3 ligases SUMOylate target proteins	2	14	0	0	0	14	1772
ESR1	ENSG00000091831	estrogen receptor 1	1695	6	TRUE	FALSE	FALSE	TRUE	FALSE	FALSE	FALSE	TRUE	FALSE	FALSE	FALSE	FALSE	[Isoform 1]: Nucleus	7	41	CHEMBL1200973	ESTRADIOL CYPIONATE	TRUE	4	FALSE	Reactome	SUMO E3 ligases SUMOylate target proteins	2	14	0	0	0	14	1772
ESR1	ENSG00000091831	estrogen receptor 1	1695	6	TRUE	FALSE	FALSE	TRUE	FALSE	FALSE	FALSE	TRUE	FALSE	FALSE	FALSE	FALSE	[Isoform 1]: Nucleus	7	41	CHEMBL1200675	TOREMIFENE CITRATE	TRUE	4	FALSE	Reactome	SUMO E3 ligases SUMOylate target proteins	2	14	0	0	0	14	1772
ESR1	ENSG00000091831	estrogen receptor 1	1695	6	TRUE	FALSE	FALSE	TRUE	FALSE	FALSE	FALSE	TRUE	FALSE	FALSE	FALSE	FALSE	[Isoform 1]: Nucleus	7	41	CHEMBL1200430	ESTRADIOL ACETATE	TRUE	4	FALSE	Reactome	SUMO E3 ligases SUMOylate target proteins	2	14	0	0	0	14	1772
ESR1	ENSG00000091831	estrogen receptor 1	1695	6	TRUE	FALSE	FALSE	TRUE	FALSE	FALSE	FALSE	TRUE	FALSE	FALSE	FALSE	FALSE	[Isoform 1]: Nucleus	7	41	CHEMBL786	TAMOXIFEN CITRATE	TRUE	4	FALSE	Reactome	SUMOylation	2	14	0	0	0	14	1772
ESR1	ENSG00000091831	estrogen receptor 1	1695	6	TRUE	FALSE	FALSE	TRUE	FALSE	FALSE	FALSE	TRUE	FALSE	FALSE	FALSE	FALSE	[Isoform 1]: Nucleus	7	41	CHEMBL786	TAMOXIFEN CITRATE	TRUE	4	FALSE	Reactome	SUMO E3 ligases SUMOylate target proteins	2	14	0	0	0	14	1772
ESR1	ENSG00000091831	estrogen receptor 1	1695	6	TRUE	FALSE	FALSE	TRUE	FALSE	FALSE	FALSE	TRUE	FALSE	FALSE	FALSE	FALSE	[Isoform 1]: Nucleus	7	41	CHEMBL1511	ESTRADIOL VALERATE	TRUE	4	FALSE	Reactome	SUMO E3 ligases SUMOylate target proteins	2	14	0	0	0	14	1772
ESR1	ENSG00000091831	estrogen receptor 1	1695	6	TRUE	FALSE	FALSE	TRUE	FALSE	FALSE	FALSE	TRUE	FALSE	FALSE	FALSE	FALSE	[Isoform 1]: Nucleus	7	41	CHEMBL135	ESTRADIOL	TRUE	4	FALSE	Reactome	SUMO E3 ligases SUMOylate target proteins	2	14	0	0	0	14	1772
ESR1	ENSG00000091831	estrogen receptor 1	1695	6	TRUE	FALSE	FALSE	TRUE	FALSE	FALSE	FALSE	TRUE	FALSE	FALSE	FALSE	FALSE	[Isoform 1]: Nucleus	7	41	CHEMBL411	DIETHYLSTILBESTROL	TRUE	4	TRUE	Reactome	SUMO E3 ligases SUMOylate target proteins	2	14	0	0	0	14	1772
ESR1	ENSG00000091831	estrogen receptor 1	1695	6	TRUE	FALSE	FALSE	TRUE	FALSE	FALSE	FALSE	TRUE	FALSE	FALSE	FALSE	FALSE	[Isoform 1]: Nucleus	7	41	CHEMBL786	TAMOXIFEN CITRATE	TRUE	4	FALSE	Reactome	SUMO E3 ligases SUMOylate target proteins	2	14	0	0	0	14	1772
IL1B	ENSG00000125538	interleukin 1 beta	1734	4	FALSE	FALSE	FALSE	FALSE	TRUE	FALSE	FALSE	FALSE	FALSE	TRUE	FALSE	FALSE	Cytoplasm	0	4	CHEMBL1201834	CANAKINUMAB	TRUE	4	FALSE	Reactome	Cytokine Signaling in Immune system	1	2	1	0	0	2	1750.5
IL1B	ENSG00000125538	interleukin 1 beta	1734	4	FALSE	FALSE	FALSE	FALSE	TRUE	FALSE	FALSE	FALSE	FALSE	TRUE	FALSE	FALSE	Cytoplasm	0	4	CHEMBL1201834	CANAKINUMAB	TRUE	4	FALSE	Reactome	Cytokine Signaling in Immune system	1	2	1	0	0	2	1750.5
IL1B	ENSG00000125538	interleukin 1 beta	1734	4	FALSE	FALSE	FALSE	FALSE	TRUE	FALSE	FALSE	FALSE	FALSE	TRUE	FALSE	FALSE	Cytoplasm	0	4	CHEMBL1201830	RILONACEPT	TRUE	4	FALSE	Reactome	Cytokine Signaling in Immune system	1	2	1	0	0	2	1750.5
IL1B	ENSG00000125538	interleukin 1 beta	1734	4	FALSE	FALSE	FALSE	FALSE	TRUE	FALSE	FALSE	FALSE	FALSE	TRUE	FALSE	FALSE	Cytoplasm	0	4	CHEMBL1201834	CANAKINUMAB	TRUE	4	FALSE	Reactome	Cytokine Signaling in Immune system	1	2	1	0	0	2	1750.5
IL1B	ENSG00000125538	interleukin 1 beta	1734	4	FALSE	FALSE	FALSE	FALSE	TRUE	FALSE	FALSE	FALSE	FALSE	TRUE	FALSE	FALSE	Cytoplasm	0	4	CHEMBL1201834	CANAKINUMAB	TRUE	4	FALSE	Reactome	Cytokine Signaling in Immune system	1	2	1	0	0	2	1750.5
IL1B	ENSG00000125538	interleukin 1 beta	1734	4	FALSE	FALSE	FALSE	FALSE	TRUE	FALSE	FALSE	FALSE	FALSE	TRUE	FALSE	FALSE	Cytoplasm	0	4	CHEMBL1743026	GEVOKIZUMAB	FALSE	3	FALSE	Reactome	Cytokine Signaling in Immune system	1	2	1	0	0	2	1750.5
IL1B	ENSG00000125538	interleukin 1 beta	1734	4	FALSE	FALSE	FALSE	FALSE	TRUE	FALSE	FALSE	FALSE	FALSE	TRUE	FALSE	FALSE	Cytoplasm	0	4	CHEMBL1201834	CANAKINUMAB	TRUE	4	FALSE	Reactome	Cytokine Signaling in Immune system	1	2	1	0	0	2	1750.5
IL1B	ENSG00000125538	interleukin 1 beta	1734	4	FALSE	FALSE	FALSE	FALSE	TRUE	FALSE	FALSE	FALSE	FALSE	TRUE	FALSE	FALSE	Cytoplasm	0	4	CHEMBL1201830	RILONACEPT	TRUE	4	FALSE	Reactome	Cytokine Signaling in Immune system	1	2	1	0	0	2	1750.5
IL1B	ENSG00000125538	interleukin 1 beta	1734	4	FALSE	FALSE	FALSE	FALSE	TRUE	FALSE	FALSE	FALSE	FALSE	TRUE	FALSE	FALSE	Cytoplasm	0	4	CHEMBL1201830	RILONACEPT	TRUE	4	FALSE	Reactome	Cytokine Signaling in Immune system	1	2	1	0	0	2	1750.5
IL1B	ENSG00000125538	interleukin 1 beta	1734	4	FALSE	FALSE	FALSE	FALSE	TRUE	FALSE	FALSE	FALSE	FALSE	TRUE	FALSE	FALSE	Cytoplasm	0	4	CHEMBL1201834	CANAKINUMAB	TRUE	4	FALSE	Reactome	Cytokine Signaling in Immune system	1	2	1	0	0	2	1750.5
IL1B	ENSG00000125538	interleukin 1 beta	1734	4	FALSE	FALSE	FALSE	FALSE	TRUE	FALSE	FALSE	FALSE	FALSE	TRUE	FALSE	FALSE	Cytoplasm	0	4	CHEMBL1201830	RILONACEPT	TRUE	4	FALSE	Reactome	Cytokine Signaling in Immune system	1	2	1	0	0	2	1750.5
IL1B	ENSG00000125538	interleukin 1 beta	1734	4	FALSE	FALSE	FALSE	FALSE	TRUE	FALSE	FALSE	FALSE	FALSE	TRUE	FALSE	FALSE	Cytoplasm	0	4	CHEMBL1201834	CANAKINUMAB	TRUE	4	FALSE	Reactome	Cytokine Signaling in Immune system	1	2	1	0	0	2	1750.5
IL1B	ENSG00000125538	interleukin 1 beta	1734	4	FALSE	FALSE	FALSE	FALSE	TRUE	FALSE	FALSE	FALSE	FALSE	TRUE	FALSE	FALSE	Cytoplasm	0	4	CHEMBL1201834	CANAKINUMAB	TRUE	4	FALSE	Reactome	Cytokine Signaling in Immune system	1	2	1	0	0	2	1750.5
IL1B	ENSG00000125538	interleukin 1 beta	1734	4	FALSE	FALSE	FALSE	FALSE	TRUE	FALSE	FALSE	FALSE	FALSE	TRUE	FALSE	FALSE	Cytoplasm	0	4	CHEMBL1201834	CANAKINUMAB	TRUE	4	FALSE	Reactome	Cytokine Signaling in Immune system	1	2	1	0	0	2	1750.5
IL1B	ENSG00000125538	interleukin 1 beta	1734	4	FALSE	FALSE	FALSE	FALSE	TRUE	FALSE	FALSE	FALSE	FALSE	TRUE	FALSE	FALSE	Cytoplasm	0	4	CHEMBL1201834	CANAKINUMAB	TRUE	4	FALSE	Reactome	Cytokine Signaling in Immune system	1	2	1	0	0	2	1750.5
IL1B	ENSG00000125538	interleukin 1 beta	1734	4	FALSE	FALSE	FALSE	FALSE	TRUE	FALSE	FALSE	FALSE	FALSE	TRUE	FALSE	FALSE	Cytoplasm	0	4	CHEMBL1201834	CANAKINUMAB	TRUE	4	FALSE	Reactome	Cytokine Signaling in Immune system	1	2	1	0	0	2	1750.5
IL1B	ENSG00000125538	interleukin 1 beta	1734	4	FALSE	FALSE	FALSE	FALSE	TRUE	FALSE	FALSE	FALSE	FALSE	TRUE	FALSE	FALSE	Cytoplasm	0	4	CHEMBL1201834	CANAKINUMAB	TRUE	4	FALSE	Reactome	Cytokine Signaling in Immune system	1	2	1	0	0	2	1750.5
IL1B	ENSG00000125538	interleukin 1 beta	1734	4	FALSE	FALSE	FALSE	FALSE	TRUE	FALSE	FALSE	FALSE	FALSE	TRUE	FALSE	FALSE	Cytoplasm	0	4	CHEMBL1201830	RILONACEPT	TRUE	4	FALSE	Reactome	Cytokine Signaling in Immune system	1	2	1	0	0	2	1750.5
IL1B	ENSG00000125538	interleukin 1 beta	1734	4	FALSE	FALSE	FALSE	FALSE	TRUE	FALSE	FALSE	FALSE	FALSE	TRUE	FALSE	FALSE	Cytoplasm	0	4	CHEMBL1201834	CANAKINUMAB	TRUE	4	FALSE	Reactome	Cytokine Signaling in Immune system	1	2	1	0	0	2	1750.5
IL1B	ENSG00000125538	interleukin 1 beta	1734	4	FALSE	FALSE	FALSE	FALSE	TRUE	FALSE	FALSE	FALSE	FALSE	TRUE	FALSE	FALSE	Cytoplasm	0	4	CHEMBL1201834	CANAKINUMAB	TRUE	4	FALSE	Reactome	Cytokine Signaling in Immune system	1	2	1	0	0	2	1750.5
IL1B	ENSG00000125538	interleukin 1 beta	1734	4	FALSE	FALSE	FALSE	FALSE	TRUE	FALSE	FALSE	FALSE	FALSE	TRUE	FALSE	FALSE	Cytoplasm	0	4	CHEMBL1201830	RILONACEPT	TRUE	4	FALSE	Reactome	Cytokine Signaling in Immune system	1	2	1	0	0	2	1750.5
IL1B	ENSG00000125538	interleukin 1 beta	1734	4	FALSE	FALSE	FALSE	FALSE	TRUE	FALSE	FALSE	FALSE	FALSE	TRUE	FALSE	FALSE	Cytoplasm	0	4	CHEMBL1201834	CANAKINUMAB	TRUE	4	FALSE	Reactome	Cytokine Signaling in Immune system	1	2	1	0	0	2	1750.5
IL1B	ENSG00000125538	interleukin 1 beta	1734	4	FALSE	FALSE	FALSE	FALSE	TRUE	FALSE	FALSE	FALSE	FALSE	TRUE	FALSE	FALSE	Cytoplasm	0	4	CHEMBL1201834	CANAKINUMAB	TRUE	4	FALSE	Reactome	Cytokine Signaling in Immune system	1	2	1	0	0	2	1750.5
IL1B	ENSG00000125538	interleukin 1 beta	1734	4	FALSE	FALSE	FALSE	FALSE	TRUE	FALSE	FALSE	FALSE	FALSE	TRUE	FALSE	FALSE	Cytoplasm	0	4	CHEMBL1201830	RILONACEPT	TRUE	4	FALSE	Reactome	Cytokine Signaling in Immune system	1	2	1	0	0	2	1750.5
IL1B	ENSG00000125538	interleukin 1 beta	1734	4	FALSE	FALSE	FALSE	FALSE	TRUE	FALSE	FALSE	FALSE	FALSE	TRUE	FALSE	FALSE	Cytoplasm	0	4	CHEMBL1201830	RILONACEPT	TRUE	4	FALSE	Reactome	Cytokine Signaling in Immune system	1	2	1	0	0	2	1750.5
CD40LG	ENSG00000102245	CD40 ligand	1708	4	FALSE	FALSE	FALSE	FALSE	FALSE	TRUE	FALSE	FALSE	FALSE	FALSE	TRUE	FALSE	Cell membrane	0	5	CHEMBL2109478	DAPIROLIZUMAB PEGOL	FALSE	3	FALSE	Reactome	Cytokine Signaling in Immune system	1	0	2	3	0	0	1724
CD40LG	ENSG00000102245	CD40 ligand	1708	4	FALSE	FALSE	FALSE	FALSE	FALSE	TRUE	FALSE	FALSE	FALSE	FALSE	TRUE	FALSE	Cell membrane	0	5	CHEMBL2108767	RUPLIZUMAB	FALSE	3	FALSE	Reactome	Cytokine Signaling in Immune system	1	0	2	3	0	0	1724
CD40LG	ENSG00000102245	CD40 ligand	1708	4	FALSE	FALSE	FALSE	FALSE	FALSE	TRUE	FALSE	FALSE	FALSE	FALSE	TRUE	FALSE	Cell membrane	0	5	CHEMBL2109478	DAPIROLIZUMAB PEGOL	FALSE	3	FALSE	Reactome	Cytokine Signaling in Immune system	1	0	2	3	0	0	1724
CD40LG	ENSG00000102245	CD40 ligand	1708	4	FALSE	FALSE	FALSE	FALSE	FALSE	TRUE	FALSE	FALSE	FALSE	FALSE	TRUE	FALSE	Cell membrane	0	5	CHEMBL4594331	DAZODALIBEP	FALSE	2	FALSE	Reactome	Cytokine Signaling in Immune system	1	0	2	3	0	0	1724
CD40LG	ENSG00000102245	CD40 ligand	1708	4	FALSE	FALSE	FALSE	FALSE	FALSE	TRUE	FALSE	FALSE	FALSE	FALSE	TRUE	FALSE	Cell membrane	0	5	CHEMBL4594331	DAZODALIBEP	FALSE	2	FALSE	Reactome	Cytokine Signaling in Immune system	1	0	2	3	0	0	1724
CD40LG	ENSG00000102245	CD40 ligand	1708	4	FALSE	FALSE	FALSE	FALSE	FALSE	TRUE	FALSE	FALSE	FALSE	FALSE	TRUE	FALSE	Cell membrane	0	5	CHEMBL4594460	AT-1501	FALSE	2	FALSE	Reactome	Cytokine Signaling in Immune system	1	0	2	3	0	0	1724
CD40LG	ENSG00000102245	CD40 ligand	1708	4	FALSE	FALSE	FALSE	FALSE	FALSE	TRUE	FALSE	FALSE	FALSE	FALSE	TRUE	FALSE	Cell membrane	0	5	CHEMBL4594331	DAZODALIBEP	FALSE	2	FALSE	Reactome	Cytokine Signaling in Immune system	1	0	2	3	0	0	1724
CD40LG	ENSG00000102245	CD40 ligand	1708	4	FALSE	FALSE	FALSE	FALSE	FALSE	TRUE	FALSE	FALSE	FALSE	FALSE	TRUE	FALSE	Cell membrane	0	5	CHEMBL2109478	DAPIROLIZUMAB PEGOL	FALSE	3	FALSE	Reactome	Cytokine Signaling in Immune system	1	0	2	3	0	0	1724
CD40LG	ENSG00000102245	CD40 ligand	1708	4	FALSE	FALSE	FALSE	FALSE	FALSE	TRUE	FALSE	FALSE	FALSE	FALSE	TRUE	FALSE	Cell membrane	0	5	CHEMBL4594460	AT-1501	FALSE	2	FALSE	Reactome	Cytokine Signaling in Immune system	1	0	2	3	0	0	1724
CD40LG	ENSG00000102245	CD40 ligand	1708	4	FALSE	FALSE	FALSE	FALSE	FALSE	TRUE	FALSE	FALSE	FALSE	FALSE	TRUE	FALSE	Cell membrane	0	5	CHEMBL4594331	DAZODALIBEP	FALSE	2	FALSE	Reactome	Cytokine Signaling in Immune system	1	0	2	3	0	0	1724
CD40LG	ENSG00000102245	CD40 ligand	1708	4	FALSE	FALSE	FALSE	FALSE	FALSE	TRUE	FALSE	FALSE	FALSE	FALSE	TRUE	FALSE	Cell membrane	0	5	CHEMBL4298212	RAVAGALIMAB	FALSE	2	FALSE	Reactome	Cytokine Signaling in Immune system	1	0	2	3	0	0	1724
CD40LG	ENSG00000102245	CD40 ligand	1708	4	FALSE	FALSE	FALSE	FALSE	FALSE	TRUE	FALSE	FALSE	FALSE	FALSE	TRUE	FALSE	Cell membrane	0	5	CHEMBL4594460	AT-1501	FALSE	2	FALSE	Reactome	Cytokine Signaling in Immune system	1	0	2	3	0	0	1724
CD40LG	ENSG00000102245	CD40 ligand	1708	4	FALSE	FALSE	FALSE	FALSE	FALSE	TRUE	FALSE	FALSE	FALSE	FALSE	TRUE	FALSE	Cell membrane	0	5	CHEMBL4298212	RAVAGALIMAB	FALSE	2	FALSE	Reactome	Cytokine Signaling in Immune system	1	0	2	3	0	0	1724
CD40LG	ENSG00000102245	CD40 ligand	1708	4	FALSE	FALSE	FALSE	FALSE	FALSE	TRUE	FALSE	FALSE	FALSE	FALSE	TRUE	FALSE	Cell membrane	0	5	CHEMBL4594460	AT-1501	FALSE	2	FALSE	Reactome	Cytokine Signaling in Immune system	1	0	2	3	0	0	1724
MMP9	ENSG00000100985	matrix metallopeptidase 9	1693	7	FALSE	TRUE	FALSE	TRUE	FALSE	TRUE	FALSE	FALSE	FALSE	FALSE	FALSE	FALSE	Secreted	2	3	CHEMBL3833374	ANDECALIXIMAB	FALSE	3	FALSE	Reactome	Cytokine Signaling in Immune system	1	0	2	1	0	0	1704
MMP9	ENSG00000100985	matrix metallopeptidase 9	1693	7	FALSE	TRUE	FALSE	TRUE	FALSE	TRUE	FALSE	FALSE	FALSE	FALSE	FALSE	FALSE	Secreted	2	3	CHEMBL3833374	ANDECALIXIMAB	FALSE	3	FALSE	Reactome	Cytokine Signaling in Immune system	1	0	2	1	0	0	1704
MMP9	ENSG00000100985	matrix metallopeptidase 9	1693	7	FALSE	TRUE	FALSE	TRUE	FALSE	TRUE	FALSE	FALSE	FALSE	FALSE	FALSE	FALSE	Secreted	2	3	CHEMBL279785	MARIMASTAT	FALSE	3	FALSE	Reactome	Cytokine Signaling in Immune system	1	0	2	1	0	0	1704
MMP9	ENSG00000100985	matrix metallopeptidase 9	1693	7	FALSE	TRUE	FALSE	TRUE	FALSE	TRUE	FALSE	FALSE	FALSE	FALSE	FALSE	FALSE	Secreted	2	3	CHEMBL4297352	AZD-1236	FALSE	2	FALSE	Reactome	Cytokine Signaling in Immune system	1	0	2	1	0	0	1704
MMP9	ENSG00000100985	matrix metallopeptidase 9	1693	7	FALSE	TRUE	FALSE	TRUE	FALSE	TRUE	FALSE	FALSE	FALSE	FALSE	FALSE	FALSE	Secreted	2	3	CHEMBL3833374	ANDECALIXIMAB	FALSE	3	FALSE	Reactome	Cytokine Signaling in Immune system	1	0	2	1	0	0	1704
MMP9	ENSG00000100985	matrix metallopeptidase 9	1693	7	FALSE	TRUE	FALSE	TRUE	FALSE	TRUE	FALSE	FALSE	FALSE	FALSE	FALSE	FALSE	Secreted	2	3	CHEMBL3833374	ANDECALIXIMAB	FALSE	3	FALSE	Reactome	Cytokine Signaling in Immune system	1	0	2	1	0	0	1704
MMP9	ENSG00000100985	matrix metallopeptidase 9	1693	7	FALSE	TRUE	FALSE	TRUE	FALSE	TRUE	FALSE	FALSE	FALSE	FALSE	FALSE	FALSE	Secreted	2	3	CHEMBL3833374	ANDECALIXIMAB	FALSE	3	FALSE	Reactome	Cytokine Signaling in Immune system	1	0	2	1	0	0	1704
MMP9	ENSG00000100985	matrix metallopeptidase 9	1693	7	FALSE	TRUE	FALSE	TRUE	FALSE	TRUE	FALSE	FALSE	FALSE	FALSE	FALSE	FALSE	Secreted	2	3	CHEMBL279785	MARIMASTAT	FALSE	3	FALSE	Reactome	Cytokine Signaling in Immune system	1	0	2	1	0	0	1704
MMP9	ENSG00000100985	matrix metallopeptidase 9	1693	7	FALSE	TRUE	FALSE	TRUE	FALSE	TRUE	FALSE	FALSE	FALSE	FALSE	FALSE	FALSE	Secreted	2	3	CHEMBL3833374	ANDECALIXIMAB	FALSE	3	FALSE	Reactome	Cytokine Signaling in Immune system	1	0	2	1	0	0	1704
MMP9	ENSG00000100985	matrix metallopeptidase 9	1693	7	FALSE	TRUE	FALSE	TRUE	FALSE	TRUE	FALSE	FALSE	FALSE	FALSE	FALSE	FALSE	Secreted	2	3	CHEMBL3833374	ANDECALIXIMAB	FALSE	3	FALSE	Reactome	Cytokine Signaling in Immune system	1	0	2	1	0	0	1704
MMP9	ENSG00000100985	matrix metallopeptidase 9	1693	7	FALSE	TRUE	FALSE	TRUE	FALSE	TRUE	FALSE	FALSE	FALSE	FALSE	FALSE	FALSE	Secreted	2	3	CHEMBL3833374	ANDECALIXIMAB	FALSE	3	FALSE	Reactome	Cytokine Signaling in Immune system	1	0	2	1	0	0	1704
MMP9	ENSG00000100985	matrix metallopeptidase 9	1693	7	FALSE	TRUE	FALSE	TRUE	FALSE	TRUE	FALSE	FALSE	FALSE	FALSE	FALSE	FALSE	Secreted	2	3	CHEMBL4297352	AZD-1236	FALSE	2	FALSE	Reactome	Cytokine Signaling in Immune system	1	0	2	1	0	0	1704
MMP9	ENSG00000100985	matrix metallopeptidase 9	1693	7	FALSE	TRUE	FALSE	TRUE	FALSE	TRUE	FALSE	FALSE	FALSE	FALSE	FALSE	FALSE	Secreted	2	3	CHEMBL3833374	ANDECALIXIMAB	FALSE	3	FALSE	Reactome	Cytokine Signaling in Immune system	1	0	2	1	0	0	1704
PTGS2	ENSG00000073756	prostaglandin-endoperoxide synthase 2	1585	4	TRUE	FALSE	FALSE	TRUE	FALSE	FALSE	FALSE	FALSE	FALSE	TRUE	FALSE	FALSE	Microsome membrane	25	75	CHEMBL3989803	DIPYRONE	TRUE	4	TRUE	Reactome	Cytokine Signaling in Immune system	1	12	0	0	0	12	1651
PTGS2	ENSG00000073756	prostaglandin-endoperoxide synthase 2	1585	4	TRUE	FALSE	FALSE	TRUE	FALSE	FALSE	FALSE	FALSE	FALSE	TRUE	FALSE	FALSE	Microsome membrane	25	75	CHEMBL469	KETOROLAC	TRUE	4	FALSE	Reactome	Cytokine Signaling in Immune system	1	12	0	0	0	12	1651
PTGS2	ENSG00000073756	prostaglandin-endoperoxide synthase 2	1585	4	TRUE	FALSE	FALSE	TRUE	FALSE	FALSE	FALSE	FALSE	FALSE	TRUE	FALSE	FALSE	Microsome membrane	25	75	CHEMBL112	ACETAMINOPHEN	TRUE	4	FALSE	Reactome	Cytokine Signaling in Immune system	1	12	0	0	0	12	1651
PTGS2	ENSG00000073756	prostaglandin-endoperoxide synthase 2	1585	4	TRUE	FALSE	FALSE	TRUE	FALSE	FALSE	FALSE	FALSE	FALSE	TRUE	FALSE	FALSE	Microsome membrane	25	75	CHEMBL112	ACETAMINOPHEN	TRUE	4	FALSE	Reactome	Cytokine Signaling in Immune system	1	12	0	0	0	12	1651
PTGS2	ENSG00000073756	prostaglandin-endoperoxide synthase 2	1585	4	TRUE	FALSE	FALSE	TRUE	FALSE	FALSE	FALSE	FALSE	FALSE	TRUE	FALSE	FALSE	Microsome membrane	25	75	CHEMBL154	NAPROXEN	TRUE	4	FALSE	Reactome	Cytokine Signaling in Immune system	1	12	0	0	0	12	1651
PTGS2	ENSG00000073756	prostaglandin-endoperoxide synthase 2	1585	4	TRUE	FALSE	FALSE	TRUE	FALSE	FALSE	FALSE	FALSE	FALSE	TRUE	FALSE	FALSE	Microsome membrane	25	75	CHEMBL521	IBUPROFEN	TRUE	4	FALSE	Reactome	Cytokine Signaling in Immune system	1	12	0	0	0	12	1651
PTGS2	ENSG00000073756	prostaglandin-endoperoxide synthase 2	1585	4	TRUE	FALSE	FALSE	TRUE	FALSE	FALSE	FALSE	FALSE	FALSE	TRUE	FALSE	FALSE	Microsome membrane	25	75	CHEMBL154	NAPROXEN	TRUE	4	FALSE	Reactome	Cytokine Signaling in Immune system	1	12	0	0	0	12	1651
PTGS2	ENSG00000073756	prostaglandin-endoperoxide synthase 2	1585	4	TRUE	FALSE	FALSE	TRUE	FALSE	FALSE	FALSE	FALSE	FALSE	TRUE	FALSE	FALSE	Microsome membrane	25	75	CHEMBL118	CELECOXIB	TRUE	4	TRUE	Reactome	Cytokine Signaling in Immune system	1	12	0	0	0	12	1651
PTGS2	ENSG00000073756	prostaglandin-endoperoxide synthase 2	1585	4	TRUE	FALSE	FALSE	TRUE	FALSE	FALSE	FALSE	FALSE	FALSE	TRUE	FALSE	FALSE	Microsome membrane	25	75	CHEMBL154	NAPROXEN	TRUE	4	FALSE	Reactome	Cytokine Signaling in Immune system	1	12	0	0	0	12	1651
PTGS2	ENSG00000073756	prostaglandin-endoperoxide synthase 2	1585	4	TRUE	FALSE	FALSE	TRUE	FALSE	FALSE	FALSE	FALSE	FALSE	TRUE	FALSE	FALSE	Microsome membrane	25	75	CHEMBL118	CELECOXIB	TRUE	4	TRUE	Reactome	Cytokine Signaling in Immune system	1	12	0	0	0	12	1651
PTGS2	ENSG00000073756	prostaglandin-endoperoxide synthase 2	1585	4	TRUE	FALSE	FALSE	TRUE	FALSE	FALSE	FALSE	FALSE	FALSE	TRUE	FALSE	FALSE	Microsome membrane	25	75	CHEMBL112	ACETAMINOPHEN	TRUE	4	FALSE	Reactome	Cytokine Signaling in Immune system	1	12	0	0	0	12	1651
PTGS2	ENSG00000073756	prostaglandin-endoperoxide synthase 2	1585	4	TRUE	FALSE	FALSE	TRUE	FALSE	FALSE	FALSE	FALSE	FALSE	TRUE	FALSE	FALSE	Microsome membrane	25	75	CHEMBL1034	DICLOFENAC SODIUM	TRUE	4	FALSE	Reactome	Cytokine Signaling in Immune system	1	12	0	0	0	12	1651
PTGS2	ENSG00000073756	prostaglandin-endoperoxide synthase 2	1585	4	TRUE	FALSE	FALSE	TRUE	FALSE	FALSE	FALSE	FALSE	FALSE	TRUE	FALSE	FALSE	Microsome membrane	25	75	CHEMBL704	MESALAMINE	TRUE	4	FALSE	Reactome	Cytokine Signaling in Immune system	1	12	0	0	0	12	1651
PTGS2	ENSG00000073756	prostaglandin-endoperoxide synthase 2	1585	4	TRUE	FALSE	FALSE	TRUE	FALSE	FALSE	FALSE	FALSE	FALSE	TRUE	FALSE	FALSE	Microsome membrane	25	75	CHEMBL112	ACETAMINOPHEN	TRUE	4	FALSE	Reactome	Cytokine Signaling in Immune system	1	12	0	0	0	12	1651
PTGS2	ENSG00000073756	prostaglandin-endoperoxide synthase 2	1585	4	TRUE	FALSE	FALSE	TRUE	FALSE	FALSE	FALSE	FALSE	FALSE	TRUE	FALSE	FALSE	Microsome membrane	25	75	CHEMBL25	ASPIRIN	TRUE	4	FALSE	Reactome	Cytokine Signaling in Immune system	1	12	0	0	0	12	1651
PTGS2	ENSG00000073756	prostaglandin-endoperoxide synthase 2	1585	4	TRUE	FALSE	FALSE	TRUE	FALSE	FALSE	FALSE	FALSE	FALSE	TRUE	FALSE	FALSE	Microsome membrane	25	75	CHEMBL25	ASPIRIN	TRUE	4	FALSE	Reactome	Cytokine Signaling in Immune system	1	12	0	0	0	12	1651
PTGS2	ENSG00000073756	prostaglandin-endoperoxide synthase 2	1585	4	TRUE	FALSE	FALSE	TRUE	FALSE	FALSE	FALSE	FALSE	FALSE	TRUE	FALSE	FALSE	Microsome membrane	25	75	CHEMBL25	ASPIRIN	TRUE	4	FALSE	Reactome	Cytokine Signaling in Immune system	1	12	0	0	0	12	1651
PTGS2	ENSG00000073756	prostaglandin-endoperoxide synthase 2	1585	4	TRUE	FALSE	FALSE	TRUE	FALSE	FALSE	FALSE	FALSE	FALSE	TRUE	FALSE	FALSE	Microsome membrane	25	75	CHEMBL118	CELECOXIB	TRUE	4	TRUE	Reactome	Cytokine Signaling in Immune system	1	12	0	0	0	12	1651
PTGS2	ENSG00000073756	prostaglandin-endoperoxide synthase 2	1585	4	TRUE	FALSE	FALSE	TRUE	FALSE	FALSE	FALSE	FALSE	FALSE	TRUE	FALSE	FALSE	Microsome membrane	25	75	CHEMBL15770	SULINDAC	TRUE	4	FALSE	Reactome	Cytokine Signaling in Immune system	1	12	0	0	0	12	1651
PTGS2	ENSG00000073756	prostaglandin-endoperoxide synthase 2	1585	4	TRUE	FALSE	FALSE	TRUE	FALSE	FALSE	FALSE	FALSE	FALSE	TRUE	FALSE	FALSE	Microsome membrane	25	75	CHEMBL1206690	PARECOXIB	TRUE	4	FALSE	Reactome	Cytokine Signaling in Immune system	1	12	0	0	0	12	1651
PTGS2	ENSG00000073756	prostaglandin-endoperoxide synthase 2	1585	4	TRUE	FALSE	FALSE	TRUE	FALSE	FALSE	FALSE	FALSE	FALSE	TRUE	FALSE	FALSE	Microsome membrane	25	75	CHEMBL469	KETOROLAC	TRUE	4	FALSE	Reactome	Cytokine Signaling in Immune system	1	12	0	0	0	12	1651
PTGS2	ENSG00000073756	prostaglandin-endoperoxide synthase 2	1585	4	TRUE	FALSE	FALSE	TRUE	FALSE	FALSE	FALSE	FALSE	FALSE	TRUE	FALSE	FALSE	Microsome membrane	25	75	CHEMBL118	CELECOXIB	TRUE	4	TRUE	Reactome	Cytokine Signaling in Immune system	1	12	0	0	0	12	1651
PTGS2	ENSG00000073756	prostaglandin-endoperoxide synthase 2	1585	4	TRUE	FALSE	FALSE	TRUE	FALSE	FALSE	FALSE	FALSE	FALSE	TRUE	FALSE	FALSE	Microsome membrane	25	75	CHEMBL469	KETOROLAC	TRUE	4	FALSE	Reactome	Cytokine Signaling in Immune system	1	12	0	0	0	12	1651
PTGS2	ENSG00000073756	prostaglandin-endoperoxide synthase 2	1585	4	TRUE	FALSE	FALSE	TRUE	FALSE	FALSE	FALSE	FALSE	FALSE	TRUE	FALSE	FALSE	Microsome membrane	25	75	CHEMBL1200804	DICLOFENAC POTASSIUM	TRUE	4	FALSE	Reactome	Cytokine Signaling in Immune system	1	12	0	0	0	12	1651
PTGS2	ENSG00000073756	prostaglandin-endoperoxide synthase 2	1585	4	TRUE	FALSE	FALSE	TRUE	FALSE	FALSE	FALSE	FALSE	FALSE	TRUE	FALSE	FALSE	Microsome membrane	25	75	CHEMBL521	IBUPROFEN	TRUE	4	FALSE	Reactome	Cytokine Signaling in Immune system	1	12	0	0	0	12	1651
MTOR	ENSG00000198793	mechanistic target of rapamycin kinase	1602	5	TRUE	FALSE	FALSE	TRUE	FALSE	FALSE	FALSE	FALSE	FALSE	FALSE	FALSE	FALSE	Endoplasmic reticulum membrane	1	25	CHEMBL3545097	SAPANISERTIB	FALSE	2	FALSE	Reactome	Regulation of TP53 Activity	3	1	2	6	0	1	1645
MTOR	ENSG00000198793	mechanistic target of rapamycin kinase	1602	5	TRUE	FALSE	FALSE	TRUE	FALSE	FALSE	FALSE	FALSE	FALSE	FALSE	FALSE	FALSE	Endoplasmic reticulum membrane	1	25	CHEMBL2326966	SF-1126	FALSE	2	FALSE	KEGG	HIF-1 signaling pathway	3	1	2	6	0	1	1645
MTOR	ENSG00000198793	mechanistic target of rapamycin kinase	1602	5	TRUE	FALSE	FALSE	TRUE	FALSE	FALSE	FALSE	FALSE	FALSE	FALSE	FALSE	FALSE	Endoplasmic reticulum membrane	1	25	CHEMBL3545366	VOXTALISIB	FALSE	2	FALSE	Reactome	Regulation of TP53 Activity	3	1	2	6	0	1	1645
MTOR	ENSG00000198793	mechanistic target of rapamycin kinase	1602	5	TRUE	FALSE	FALSE	TRUE	FALSE	FALSE	FALSE	FALSE	FALSE	FALSE	FALSE	FALSE	Endoplasmic reticulum membrane	1	25	CHEMBL2336325	VISTUSERTIB	FALSE	2	FALSE	Reactome	Regulation of TP53 Activity	3	1	2	6	0	1	1645
MTOR	ENSG00000198793	mechanistic target of rapamycin kinase	1602	5	TRUE	FALSE	FALSE	TRUE	FALSE	FALSE	FALSE	FALSE	FALSE	FALSE	FALSE	FALSE	Endoplasmic reticulum membrane	1	25	CHEMBL2103839	RIDAFOROLIMUS	FALSE	3	FALSE	KEGG	HIF-1 signaling pathway	3	1	2	6	0	1	1645
MTOR	ENSG00000198793	mechanistic target of rapamycin kinase	1602	5	TRUE	FALSE	FALSE	TRUE	FALSE	FALSE	FALSE	FALSE	FALSE	FALSE	FALSE	FALSE	Endoplasmic reticulum membrane	1	25	CHEMBL75880	PERHEXILINE	TRUE	4	TRUE	Reactome	Regulation of TP53 Activity	3	1	2	6	0	1	1645
MTOR	ENSG00000198793	mechanistic target of rapamycin kinase	1602	5	TRUE	FALSE	FALSE	TRUE	FALSE	FALSE	FALSE	FALSE	FALSE	FALSE	FALSE	FALSE	Endoplasmic reticulum membrane	1	25	CHEMBL1879463	DACTOLISIB	FALSE	3	FALSE	KEGG	HIF-1 signaling pathway	3	1	2	6	0	1	1645
MTOR	ENSG00000198793	mechanistic target of rapamycin kinase	1602	5	TRUE	FALSE	FALSE	TRUE	FALSE	FALSE	FALSE	FALSE	FALSE	FALSE	FALSE	FALSE	Endoplasmic reticulum membrane	1	25	CHEMBL2336325	VISTUSERTIB	FALSE	2	FALSE	KEGG	HIF-1 signaling pathway	3	1	2	6	0	1	1645
MTOR	ENSG00000198793	mechanistic target of rapamycin kinase	1602	5	TRUE	FALSE	FALSE	TRUE	FALSE	FALSE	FALSE	FALSE	FALSE	FALSE	FALSE	FALSE	Endoplasmic reticulum membrane	1	25	CHEMBL592445	GEDATOLISIB	FALSE	2	FALSE	Reactome	Regulation of TP53 Activity	3	1	2	6	0	1	1645
MTOR	ENSG00000198793	mechanistic target of rapamycin kinase	1602	5	TRUE	FALSE	FALSE	TRUE	FALSE	FALSE	FALSE	FALSE	FALSE	FALSE	FALSE	FALSE	Endoplasmic reticulum membrane	1	25	CHEMBL3545097	SAPANISERTIB	FALSE	2	FALSE	KEGG	HIF-1 signaling pathway	3	1	2	6	0	1	1645
MTOR	ENSG00000198793	mechanistic target of rapamycin kinase	1602	5	TRUE	FALSE	FALSE	TRUE	FALSE	FALSE	FALSE	FALSE	FALSE	FALSE	FALSE	FALSE	Endoplasmic reticulum membrane	1	25	CHEMBL592445	GEDATOLISIB	FALSE	2	FALSE	KEGG	HIF-1 signaling pathway	3	1	2	6	0	1	1645
MTOR	ENSG00000198793	mechanistic target of rapamycin kinase	1602	5	TRUE	FALSE	FALSE	TRUE	FALSE	FALSE	FALSE	FALSE	FALSE	FALSE	FALSE	FALSE	Endoplasmic reticulum membrane	1	25	CHEMBL2336325	VISTUSERTIB	FALSE	2	FALSE	Reactome	Regulation of TP53 Activity	3	1	2	6	0	1	1645
MTOR	ENSG00000198793	mechanistic target of rapamycin kinase	1602	5	TRUE	FALSE	FALSE	TRUE	FALSE	FALSE	FALSE	FALSE	FALSE	FALSE	FALSE	FALSE	Endoplasmic reticulum membrane	1	25	CHEMBL592445	GEDATOLISIB	FALSE	2	FALSE	KEGG	HIF-1 signaling pathway	3	1	2	6	0	1	1645
MTOR	ENSG00000198793	mechanistic target of rapamycin kinase	1602	5	TRUE	FALSE	FALSE	TRUE	FALSE	FALSE	FALSE	FALSE	FALSE	FALSE	FALSE	FALSE	Endoplasmic reticulum membrane	1	25	CHEMBL2336325	VISTUSERTIB	FALSE	2	FALSE	KEGG	HIF-1 signaling pathway	3	1	2	6	0	1	1645
MTOR	ENSG00000198793	mechanistic target of rapamycin kinase	1602	5	TRUE	FALSE	FALSE	TRUE	FALSE	FALSE	FALSE	FALSE	FALSE	FALSE	FALSE	FALSE	Endoplasmic reticulum membrane	1	25	CHEMBL1879463	DACTOLISIB	FALSE	3	FALSE	KEGG	HIF-1 signaling pathway	3	1	2	6	0	1	1645
MTOR	ENSG00000198793	mechanistic target of rapamycin kinase	1602	5	TRUE	FALSE	FALSE	TRUE	FALSE	FALSE	FALSE	FALSE	FALSE	FALSE	FALSE	FALSE	Endoplasmic reticulum membrane	1	25	CHEMBL592445	GEDATOLISIB	FALSE	2	FALSE	KEGG	HIF-1 signaling pathway	3	1	2	6	0	1	1645
MTOR	ENSG00000198793	mechanistic target of rapamycin kinase	1602	5	TRUE	FALSE	FALSE	TRUE	FALSE	FALSE	FALSE	FALSE	FALSE	FALSE	FALSE	FALSE	Endoplasmic reticulum membrane	1	25	CHEMBL2336325	VISTUSERTIB	FALSE	2	FALSE	KEGG	HIF-1 signaling pathway	3	1	2	6	0	1	1645
MTOR	ENSG00000198793	mechanistic target of rapamycin kinase	1602	5	TRUE	FALSE	FALSE	TRUE	FALSE	FALSE	FALSE	FALSE	FALSE	FALSE	FALSE	FALSE	Endoplasmic reticulum membrane	1	25	CHEMBL75880	PERHEXILINE	TRUE	4	TRUE	Reactome	Regulation of TP53 Activity	3	1	2	6	0	1	1645
MTOR	ENSG00000198793	mechanistic target of rapamycin kinase	1602	5	TRUE	FALSE	FALSE	TRUE	FALSE	FALSE	FALSE	FALSE	FALSE	FALSE	FALSE	FALSE	Endoplasmic reticulum membrane	1	25	CHEMBL3545097	SAPANISERTIB	FALSE	2	FALSE	KEGG	HIF-1 signaling pathway	3	1	2	6	0	1	1645
MTOR	ENSG00000198793	mechanistic target of rapamycin kinase	1602	5	TRUE	FALSE	FALSE	TRUE	FALSE	FALSE	FALSE	FALSE	FALSE	FALSE	FALSE	FALSE	Endoplasmic reticulum membrane	1	25	CHEMBL592445	GEDATOLISIB	FALSE	2	FALSE	Reactome	Regulation of TP53 Activity	3	1	2	6	0	1	1645
MTOR	ENSG00000198793	mechanistic target of rapamycin kinase	1602	5	TRUE	FALSE	FALSE	TRUE	FALSE	FALSE	FALSE	FALSE	FALSE	FALSE	FALSE	FALSE	Endoplasmic reticulum membrane	1	25	CHEMBL75880	PERHEXILINE	TRUE	4	TRUE	KEGG	HIF-1 signaling pathway	3	1	2	6	0	1	1645
MTOR	ENSG00000198793	mechanistic target of rapamycin kinase	1602	5	TRUE	FALSE	FALSE	TRUE	FALSE	FALSE	FALSE	FALSE	FALSE	FALSE	FALSE	FALSE	Endoplasmic reticulum membrane	1	25	CHEMBL75880	PERHEXILINE	TRUE	4	TRUE	Reactome	Transcriptional Regulation by TP53	3	1	2	6	0	1	1645
MTOR	ENSG00000198793	mechanistic target of rapamycin kinase	1602	5	TRUE	FALSE	FALSE	TRUE	FALSE	FALSE	FALSE	FALSE	FALSE	FALSE	FALSE	FALSE	Endoplasmic reticulum membrane	1	25	CHEMBL2103839	RIDAFOROLIMUS	FALSE	3	FALSE	Reactome	Regulation of TP53 Activity	3	1	2	6	0	1	1645
MTOR	ENSG00000198793	mechanistic target of rapamycin kinase	1602	5	TRUE	FALSE	FALSE	TRUE	FALSE	FALSE	FALSE	FALSE	FALSE	FALSE	FALSE	FALSE	Endoplasmic reticulum membrane	1	25	CHEMBL3545097	SAPANISERTIB	FALSE	2	FALSE	KEGG	HIF-1 signaling pathway	3	1	2	6	0	1	1645
MTOR	ENSG00000198793	mechanistic target of rapamycin kinase	1602	5	TRUE	FALSE	FALSE	TRUE	FALSE	FALSE	FALSE	FALSE	FALSE	FALSE	FALSE	FALSE	Endoplasmic reticulum membrane	1	25	CHEMBL2103839	RIDAFOROLIMUS	FALSE	3	FALSE	Reactome	Regulation of TP53 Activity	3	1	2	6	0	1	1645
MTOR	ENSG00000198793	mechanistic target of rapamycin kinase	1602	5	TRUE	FALSE	FALSE	TRUE	FALSE	FALSE	FALSE	FALSE	FALSE	FALSE	FALSE	FALSE	Endoplasmic reticulum membrane	1	25	CHEMBL75880	PERHEXILINE	TRUE	4	TRUE	KEGG	HIF-1 signaling pathway	3	1	2	6	0	1	1645
MTOR	ENSG00000198793	mechanistic target of rapamycin kinase	1602	5	TRUE	FALSE	FALSE	TRUE	FALSE	FALSE	FALSE	FALSE	FALSE	FALSE	FALSE	FALSE	Endoplasmic reticulum membrane	1	25	CHEMBL1922094	APITOLISIB	FALSE	2	FALSE	Reactome	Regulation of TP53 Activity	3	1	2	6	0	1	1645
MTOR	ENSG00000198793	mechanistic target of rapamycin kinase	1602	5	TRUE	FALSE	FALSE	TRUE	FALSE	FALSE	FALSE	FALSE	FALSE	FALSE	FALSE	FALSE	Endoplasmic reticulum membrane	1	25	CHEMBL75880	PERHEXILINE	TRUE	4	TRUE	Reactome	Regulation of TP53 Activity	3	1	2	6	0	1	1645
MTOR	ENSG00000198793	mechanistic target of rapamycin kinase	1602	5	TRUE	FALSE	FALSE	TRUE	FALSE	FALSE	FALSE	FALSE	FALSE	FALSE	FALSE	FALSE	Endoplasmic reticulum membrane	1	25	CHEMBL1922094	APITOLISIB	FALSE	2	FALSE	KEGG	HIF-1 signaling pathway	3	1	2	6	0	1	1645
MTOR	ENSG00000198793	mechanistic target of rapamycin kinase	1602	5	TRUE	FALSE	FALSE	TRUE	FALSE	FALSE	FALSE	FALSE	FALSE	FALSE	FALSE	FALSE	Endoplasmic reticulum membrane	1	25	CHEMBL1879463	DACTOLISIB	FALSE	3	FALSE	Reactome	Regulation of TP53 Activity	3	1	2	6	0	1	1645
MTOR	ENSG00000198793	mechanistic target of rapamycin kinase	1602	5	TRUE	FALSE	FALSE	TRUE	FALSE	FALSE	FALSE	FALSE	FALSE	FALSE	FALSE	FALSE	Endoplasmic reticulum membrane	1	25	CHEMBL3545097	SAPANISERTIB	FALSE	2	FALSE	Reactome	Transcriptional Regulation by TP53	3	1	2	6	0	1	1645
MTOR	ENSG00000198793	mechanistic target of rapamycin kinase	1602	5	TRUE	FALSE	FALSE	TRUE	FALSE	FALSE	FALSE	FALSE	FALSE	FALSE	FALSE	FALSE	Endoplasmic reticulum membrane	1	25	CHEMBL3545097	SAPANISERTIB	FALSE	2	FALSE	Reactome	Transcriptional Regulation by TP53	3	1	2	6	0	1	1645
MTOR	ENSG00000198793	mechanistic target of rapamycin kinase	1602	5	TRUE	FALSE	FALSE	TRUE	FALSE	FALSE	FALSE	FALSE	FALSE	FALSE	FALSE	FALSE	Endoplasmic reticulum membrane	1	25	CHEMBL75880	PERHEXILINE	TRUE	4	TRUE	Reactome	Transcriptional Regulation by TP53	3	1	2	6	0	1	1645
MTOR	ENSG00000198793	mechanistic target of rapamycin kinase	1602	5	TRUE	FALSE	FALSE	TRUE	FALSE	FALSE	FALSE	FALSE	FALSE	FALSE	FALSE	FALSE	Endoplasmic reticulum membrane	1	25	CHEMBL3545097	SAPANISERTIB	FALSE	2	FALSE	Reactome	Regulation of TP53 Activity	3	1	2	6	0	1	1645
MTOR	ENSG00000198793	mechanistic target of rapamycin kinase	1602	5	TRUE	FALSE	FALSE	TRUE	FALSE	FALSE	FALSE	FALSE	FALSE	FALSE	FALSE	FALSE	Endoplasmic reticulum membrane	1	25	CHEMBL1879463	DACTOLISIB	FALSE	3	FALSE	Reactome	Regulation of TP53 Activity	3	1	2	6	0	1	1645
MTOR	ENSG00000198793	mechanistic target of rapamycin kinase	1602	5	TRUE	FALSE	FALSE	TRUE	FALSE	FALSE	FALSE	FALSE	FALSE	FALSE	FALSE	FALSE	Endoplasmic reticulum membrane	1	25	CHEMBL2103839	RIDAFOROLIMUS	FALSE	3	FALSE	Reactome	Regulation of TP53 Activity	3	1	2	6	0	1	1645
MTOR	ENSG00000198793	mechanistic target of rapamycin kinase	1602	5	TRUE	FALSE	FALSE	TRUE	FALSE	FALSE	FALSE	FALSE	FALSE	FALSE	FALSE	FALSE	Endoplasmic reticulum membrane	1	25	CHEMBL1879463	DACTOLISIB	FALSE	3	FALSE	Reactome	Transcriptional Regulation by TP53	3	1	2	6	0	1	1645
MTOR	ENSG00000198793	mechanistic target of rapamycin kinase	1602	5	TRUE	FALSE	FALSE	TRUE	FALSE	FALSE	FALSE	FALSE	FALSE	FALSE	FALSE	FALSE	Endoplasmic reticulum membrane	1	25	CHEMBL2103839	RIDAFOROLIMUS	FALSE	3	FALSE	Reactome	Regulation of TP53 Activity	3	1	2	6	0	1	1645
MTOR	ENSG00000198793	mechanistic target of rapamycin kinase	1602	5	TRUE	FALSE	FALSE	TRUE	FALSE	FALSE	FALSE	FALSE	FALSE	FALSE	FALSE	FALSE	Endoplasmic reticulum membrane	1	25	CHEMBL592445	GEDATOLISIB	FALSE	2	FALSE	Reactome	Transcriptional Regulation by TP53	3	1	2	6	0	1	1645
MTOR	ENSG00000198793	mechanistic target of rapamycin kinase	1602	5	TRUE	FALSE	FALSE	TRUE	FALSE	FALSE	FALSE	FALSE	FALSE	FALSE	FALSE	FALSE	Endoplasmic reticulum membrane	1	25	CHEMBL2336325	VISTUSERTIB	FALSE	2	FALSE	Reactome	Regulation of TP53 Activity	3	1	2	6	0	1	1645
MTOR	ENSG00000198793	mechanistic target of rapamycin kinase	1602	5	TRUE	FALSE	FALSE	TRUE	FALSE	FALSE	FALSE	FALSE	FALSE	FALSE	FALSE	FALSE	Endoplasmic reticulum membrane	1	25	CHEMBL1922094	APITOLISIB	FALSE	2	FALSE	Reactome	Transcriptional Regulation by TP53	3	1	2	6	0	1	1645
MTOR	ENSG00000198793	mechanistic target of rapamycin kinase	1602	5	TRUE	FALSE	FALSE	TRUE	FALSE	FALSE	FALSE	FALSE	FALSE	FALSE	FALSE	FALSE	Endoplasmic reticulum membrane	1	25	CHEMBL592445	GEDATOLISIB	FALSE	2	FALSE	Reactome	Regulation of TP53 Activity	3	1	2	6	0	1	1645
MTOR	ENSG00000198793	mechanistic target of rapamycin kinase	1602	5	TRUE	FALSE	FALSE	TRUE	FALSE	FALSE	FALSE	FALSE	FALSE	FALSE	FALSE	FALSE	Endoplasmic reticulum membrane	1	25	CHEMBL592445	GEDATOLISIB	FALSE	2	FALSE	Reactome	Transcriptional Regulation by TP53	3	1	2	6	0	1	1645
MTOR	ENSG00000198793	mechanistic target of rapamycin kinase	1602	5	TRUE	FALSE	FALSE	TRUE	FALSE	FALSE	FALSE	FALSE	FALSE	FALSE	FALSE	FALSE	Endoplasmic reticulum membrane	1	25	CHEMBL3545366	VOXTALISIB	FALSE	2	FALSE	KEGG	HIF-1 signaling pathway	3	1	2	6	0	1	1645
MTOR	ENSG00000198793	mechanistic target of rapamycin kinase	1602	5	TRUE	FALSE	FALSE	TRUE	FALSE	FALSE	FALSE	FALSE	FALSE	FALSE	FALSE	FALSE	Endoplasmic reticulum membrane	1	25	CHEMBL2103839	RIDAFOROLIMUS	FALSE	3	FALSE	KEGG	HIF-1 signaling pathway	3	1	2	6	0	1	1645
MTOR	ENSG00000198793	mechanistic target of rapamycin kinase	1602	5	TRUE	FALSE	FALSE	TRUE	FALSE	FALSE	FALSE	FALSE	FALSE	FALSE	FALSE	FALSE	Endoplasmic reticulum membrane	1	25	CHEMBL75880	PERHEXILINE	TRUE	4	TRUE	Reactome	Regulation of TP53 Activity	3	1	2	6	0	1	1645
MTOR	ENSG00000198793	mechanistic target of rapamycin kinase	1602	5	TRUE	FALSE	FALSE	TRUE	FALSE	FALSE	FALSE	FALSE	FALSE	FALSE	FALSE	FALSE	Endoplasmic reticulum membrane	1	25	CHEMBL1879463	DACTOLISIB	FALSE	3	FALSE	Reactome	Transcriptional Regulation by TP53	3	1	2	6	0	1	1645
MTOR	ENSG00000198793	mechanistic target of rapamycin kinase	1602	5	TRUE	FALSE	FALSE	TRUE	FALSE	FALSE	FALSE	FALSE	FALSE	FALSE	FALSE	FALSE	Endoplasmic reticulum membrane	1	25	CHEMBL592445	GEDATOLISIB	FALSE	2	FALSE	Reactome	Regulation of TP53 Activity	3	1	2	6	0	1	1645
MTOR	ENSG00000198793	mechanistic target of rapamycin kinase	1602	5	TRUE	FALSE	FALSE	TRUE	FALSE	FALSE	FALSE	FALSE	FALSE	FALSE	FALSE	FALSE	Endoplasmic reticulum membrane	1	25	CHEMBL592445	GEDATOLISIB	FALSE	2	FALSE	Reactome	Transcriptional Regulation by TP53	3	1	2	6	0	1	1645
MTOR	ENSG00000198793	mechanistic target of rapamycin kinase	1602	5	TRUE	FALSE	FALSE	TRUE	FALSE	FALSE	FALSE	FALSE	FALSE	FALSE	FALSE	FALSE	Endoplasmic reticulum membrane	1	25	CHEMBL2103839	RIDAFOROLIMUS	FALSE	3	FALSE	Reactome	Transcriptional Regulation by TP53	3	1	2	6	0	1	1645
MTOR	ENSG00000198793	mechanistic target of rapamycin kinase	1602	5	TRUE	FALSE	FALSE	TRUE	FALSE	FALSE	FALSE	FALSE	FALSE	FALSE	FALSE	FALSE	Endoplasmic reticulum membrane	1	25	CHEMBL592445	GEDATOLISIB	FALSE	2	FALSE	Reactome	Transcriptional Regulation by TP53	3	1	2	6	0	1	1645
MTOR	ENSG00000198793	mechanistic target of rapamycin kinase	1602	5	TRUE	FALSE	FALSE	TRUE	FALSE	FALSE	FALSE	FALSE	FALSE	FALSE	FALSE	FALSE	Endoplasmic reticulum membrane	1	25	CHEMBL2103839	RIDAFOROLIMUS	FALSE	3	FALSE	KEGG	HIF-1 signaling pathway	3	1	2	6	0	1	1645
MTOR	ENSG00000198793	mechanistic target of rapamycin kinase	1602	5	TRUE	FALSE	FALSE	TRUE	FALSE	FALSE	FALSE	FALSE	FALSE	FALSE	FALSE	FALSE	Endoplasmic reticulum membrane	1	25	CHEMBL2336325	VISTUSERTIB	FALSE	2	FALSE	Reactome	Transcriptional Regulation by TP53	3	1	2	6	0	1	1645
MTOR	ENSG00000198793	mechanistic target of rapamycin kinase	1602	5	TRUE	FALSE	FALSE	TRUE	FALSE	FALSE	FALSE	FALSE	FALSE	FALSE	FALSE	FALSE	Endoplasmic reticulum membrane	1	25	CHEMBL2103839	RIDAFOROLIMUS	FALSE	3	FALSE	Reactome	Transcriptional Regulation by TP53	3	1	2	6	0	1	1645
MTOR	ENSG00000198793	mechanistic target of rapamycin kinase	1602	5	TRUE	FALSE	FALSE	TRUE	FALSE	FALSE	FALSE	FALSE	FALSE	FALSE	FALSE	FALSE	Endoplasmic reticulum membrane	1	25	CHEMBL1879463	DACTOLISIB	FALSE	3	FALSE	Reactome	Regulation of TP53 Activity	3	1	2	6	0	1	1645
MTOR	ENSG00000198793	mechanistic target of rapamycin kinase	1602	5	TRUE	FALSE	FALSE	TRUE	FALSE	FALSE	FALSE	FALSE	FALSE	FALSE	FALSE	FALSE	Endoplasmic reticulum membrane	1	25	CHEMBL75880	PERHEXILINE	TRUE	4	TRUE	KEGG	HIF-1 signaling pathway	3	1	2	6	0	1	1645
MTOR	ENSG00000198793	mechanistic target of rapamycin kinase	1602	5	TRUE	FALSE	FALSE	TRUE	FALSE	FALSE	FALSE	FALSE	FALSE	FALSE	FALSE	FALSE	Endoplasmic reticulum membrane	1	25	CHEMBL2336325	VISTUSERTIB	FALSE	2	FALSE	Reactome	Transcriptional Regulation by TP53	3	1	2	6	0	1	1645
MTOR	ENSG00000198793	mechanistic target of rapamycin kinase	1602	5	TRUE	FALSE	FALSE	TRUE	FALSE	FALSE	FALSE	FALSE	FALSE	FALSE	FALSE	FALSE	Endoplasmic reticulum membrane	1	25	CHEMBL592445	GEDATOLISIB	FALSE	2	FALSE	KEGG	HIF-1 signaling pathway	3	1	2	6	0	1	1645
MTOR	ENSG00000198793	mechanistic target of rapamycin kinase	1602	5	TRUE	FALSE	FALSE	TRUE	FALSE	FALSE	FALSE	FALSE	FALSE	FALSE	FALSE	FALSE	Endoplasmic reticulum membrane	1	25	CHEMBL2326966	SF-1126	FALSE	2	FALSE	Reactome	Transcriptional Regulation by TP53	3	1	2	6	0	1	1645
MTOR	ENSG00000198793	mechanistic target of rapamycin kinase	1602	5	TRUE	FALSE	FALSE	TRUE	FALSE	FALSE	FALSE	FALSE	FALSE	FALSE	FALSE	FALSE	Endoplasmic reticulum membrane	1	25	CHEMBL1879463	DACTOLISIB	FALSE	3	FALSE	Reactome	Transcriptional Regulation by TP53	3	1	2	6	0	1	1645
MTOR	ENSG00000198793	mechanistic target of rapamycin kinase	1602	5	TRUE	FALSE	FALSE	TRUE	FALSE	FALSE	FALSE	FALSE	FALSE	FALSE	FALSE	FALSE	Endoplasmic reticulum membrane	1	25	CHEMBL2336325	VISTUSERTIB	FALSE	2	FALSE	Reactome	Transcriptional Regulation by TP53	3	1	2	6	0	1	1645
MTOR	ENSG00000198793	mechanistic target of rapamycin kinase	1602	5	TRUE	FALSE	FALSE	TRUE	FALSE	FALSE	FALSE	FALSE	FALSE	FALSE	FALSE	FALSE	Endoplasmic reticulum membrane	1	25	CHEMBL2326966	SF-1126	FALSE	2	FALSE	Reactome	Regulation of TP53 Activity	3	1	2	6	0	1	1645
MTOR	ENSG00000198793	mechanistic target of rapamycin kinase	1602	5	TRUE	FALSE	FALSE	TRUE	FALSE	FALSE	FALSE	FALSE	FALSE	FALSE	FALSE	FALSE	Endoplasmic reticulum membrane	1	25	CHEMBL3545097	SAPANISERTIB	FALSE	2	FALSE	Reactome	Transcriptional Regulation by TP53	3	1	2	6	0	1	1645
MTOR	ENSG00000198793	mechanistic target of rapamycin kinase	1602	5	TRUE	FALSE	FALSE	TRUE	FALSE	FALSE	FALSE	FALSE	FALSE	FALSE	FALSE	FALSE	Endoplasmic reticulum membrane	1	25	CHEMBL2103839	RIDAFOROLIMUS	FALSE	3	FALSE	KEGG	HIF-1 signaling pathway	3	1	2	6	0	1	1645
MTOR	ENSG00000198793	mechanistic target of rapamycin kinase	1602	5	TRUE	FALSE	FALSE	TRUE	FALSE	FALSE	FALSE	FALSE	FALSE	FALSE	FALSE	FALSE	Endoplasmic reticulum membrane	1	25	CHEMBL2103839	RIDAFOROLIMUS	FALSE	3	FALSE	Reactome	Transcriptional Regulation by TP53	3	1	2	6	0	1	1645
MTOR	ENSG00000198793	mechanistic target of rapamycin kinase	1602	5	TRUE	FALSE	FALSE	TRUE	FALSE	FALSE	FALSE	FALSE	FALSE	FALSE	FALSE	FALSE	Endoplasmic reticulum membrane	1	25	CHEMBL1879463	DACTOLISIB	FALSE	3	FALSE	KEGG	HIF-1 signaling pathway	3	1	2	6	0	1	1645
MTOR	ENSG00000198793	mechanistic target of rapamycin kinase	1602	5	TRUE	FALSE	FALSE	TRUE	FALSE	FALSE	FALSE	FALSE	FALSE	FALSE	FALSE	FALSE	Endoplasmic reticulum membrane	1	25	CHEMBL2103839	RIDAFOROLIMUS	FALSE	3	FALSE	Reactome	Transcriptional Regulation by TP53	3	1	2	6	0	1	1645
MTOR	ENSG00000198793	mechanistic target of rapamycin kinase	1602	5	TRUE	FALSE	FALSE	TRUE	FALSE	FALSE	FALSE	FALSE	FALSE	FALSE	FALSE	FALSE	Endoplasmic reticulum membrane	1	25	CHEMBL3545097	SAPANISERTIB	FALSE	2	FALSE	Reactome	Regulation of TP53 Activity	3	1	2	6	0	1	1645
MTOR	ENSG00000198793	mechanistic target of rapamycin kinase	1602	5	TRUE	FALSE	FALSE	TRUE	FALSE	FALSE	FALSE	FALSE	FALSE	FALSE	FALSE	FALSE	Endoplasmic reticulum membrane	1	25	CHEMBL75880	PERHEXILINE	TRUE	4	TRUE	Reactome	Transcriptional Regulation by TP53	3	1	2	6	0	1	1645
MTOR	ENSG00000198793	mechanistic target of rapamycin kinase	1602	5	TRUE	FALSE	FALSE	TRUE	FALSE	FALSE	FALSE	FALSE	FALSE	FALSE	FALSE	FALSE	Endoplasmic reticulum membrane	1	25	CHEMBL3545366	VOXTALISIB	FALSE	2	FALSE	Reactome	Transcriptional Regulation by TP53	3	1	2	6	0	1	1645
MTOR	ENSG00000198793	mechanistic target of rapamycin kinase	1602	5	TRUE	FALSE	FALSE	TRUE	FALSE	FALSE	FALSE	FALSE	FALSE	FALSE	FALSE	FALSE	Endoplasmic reticulum membrane	1	25	CHEMBL2103839	RIDAFOROLIMUS	FALSE	3	FALSE	Reactome	Regulation of TP53 Activity	3	1	2	6	0	1	1645
MTOR	ENSG00000198793	mechanistic target of rapamycin kinase	1602	5	TRUE	FALSE	FALSE	TRUE	FALSE	FALSE	FALSE	FALSE	FALSE	FALSE	FALSE	FALSE	Endoplasmic reticulum membrane	1	25	CHEMBL75880	PERHEXILINE	TRUE	4	TRUE	Reactome	Transcriptional Regulation by TP53	3	1	2	6	0	1	1645
MTOR	ENSG00000198793	mechanistic target of rapamycin kinase	1602	5	TRUE	FALSE	FALSE	TRUE	FALSE	FALSE	FALSE	FALSE	FALSE	FALSE	FALSE	FALSE	Endoplasmic reticulum membrane	1	25	CHEMBL2103839	RIDAFOROLIMUS	FALSE	3	FALSE	KEGG	HIF-1 signaling pathway	3	1	2	6	0	1	1645
MTOR	ENSG00000198793	mechanistic target of rapamycin kinase	1602	5	TRUE	FALSE	FALSE	TRUE	FALSE	FALSE	FALSE	FALSE	FALSE	FALSE	FALSE	FALSE	Endoplasmic reticulum membrane	1	25	CHEMBL2103839	RIDAFOROLIMUS	FALSE	3	FALSE	Reactome	Transcriptional Regulation by TP53	3	1	2	6	0	1	1645
MTOR	ENSG00000198793	mechanistic target of rapamycin kinase	1602	5	TRUE	FALSE	FALSE	TRUE	FALSE	FALSE	FALSE	FALSE	FALSE	FALSE	FALSE	FALSE	Endoplasmic reticulum membrane	1	25	CHEMBL75880	PERHEXILINE	TRUE	4	TRUE	KEGG	HIF-1 signaling pathway	3	1	2	6	0	1	1645
IL10	ENSG00000136634	interleukin 10	1638	2	FALSE	FALSE	FALSE	FALSE	FALSE	TRUE	FALSE	FALSE	FALSE	FALSE	FALSE	FALSE	Secreted	0	1	CHEMBL2109460	SCH-708980	FALSE	2	FALSE	Reactome	Cytokine Signaling in Immune system	1	0	0	1	0	0	1643
AKT1	ENSG00000142208	AKT serine/threonine kinase 1	1561	6	FALSE	TRUE	FALSE	TRUE	FALSE	FALSE	FALSE	FALSE	FALSE	FALSE	FALSE	FALSE	Cytoplasm	5	14	CHEMBL2177390	IPATASERTIB	FALSE	3	FALSE	KEGG	HIF-1 signaling pathway	9	0	2	2	0	0	1585
AKT1	ENSG00000142208	AKT serine/threonine kinase 1	1561	6	FALSE	TRUE	FALSE	TRUE	FALSE	FALSE	FALSE	FALSE	FALSE	FALSE	FALSE	FALSE	Cytoplasm	5	14	CHEMBL2325741	CAPIVASERTIB	FALSE	3	FALSE	KEGG	HIF-1 signaling pathway	9	0	2	2	0	0	1585
AKT1	ENSG00000142208	AKT serine/threonine kinase 1	1561	6	FALSE	TRUE	FALSE	TRUE	FALSE	FALSE	FALSE	FALSE	FALSE	FALSE	FALSE	FALSE	Cytoplasm	5	14	CHEMBL1079175	MK-2206	FALSE	2	FALSE	KEGG	HIF-1 signaling pathway	9	0	2	2	0	0	1585
AKT1	ENSG00000142208	AKT serine/threonine kinase 1	1561	6	FALSE	TRUE	FALSE	TRUE	FALSE	FALSE	FALSE	FALSE	FALSE	FALSE	FALSE	FALSE	Cytoplasm	5	14	CHEMBL2325741	CAPIVASERTIB	FALSE	3	FALSE	KEGG	HIF-1 signaling pathway	9	0	2	2	0	0	1585
AKT1	ENSG00000142208	AKT serine/threonine kinase 1	1561	6	FALSE	TRUE	FALSE	TRUE	FALSE	FALSE	FALSE	FALSE	FALSE	FALSE	FALSE	FALSE	Cytoplasm	5	14	CHEMBL2325741	CAPIVASERTIB	FALSE	3	FALSE	KEGG	HIF-1 signaling pathway	9	0	2	2	0	0	1585
AKT1	ENSG00000142208	AKT serine/threonine kinase 1	1561	6	FALSE	TRUE	FALSE	TRUE	FALSE	FALSE	FALSE	FALSE	FALSE	FALSE	FALSE	FALSE	Cytoplasm	5	14	CHEMBL3137336	UPROSERTIB	FALSE	2	FALSE	KEGG	HIF-1 signaling pathway	9	0	2	2	0	0	1585
AKT1	ENSG00000142208	AKT serine/threonine kinase 1	1561	6	FALSE	TRUE	FALSE	TRUE	FALSE	FALSE	FALSE	FALSE	FALSE	FALSE	FALSE	FALSE	Cytoplasm	5	14	CHEMBL1079175	MK-2206	FALSE	2	FALSE	KEGG	HIF-1 signaling pathway	9	0	2	2	0	0	1585
AKT1	ENSG00000142208	AKT serine/threonine kinase 1	1561	6	FALSE	TRUE	FALSE	TRUE	FALSE	FALSE	FALSE	FALSE	FALSE	FALSE	FALSE	FALSE	Cytoplasm	5	14	CHEMBL1079175	MK-2206	FALSE	2	FALSE	KEGG	HIF-1 signaling pathway	9	0	2	2	0	0	1585
AKT1	ENSG00000142208	AKT serine/threonine kinase 1	1561	6	FALSE	TRUE	FALSE	TRUE	FALSE	FALSE	FALSE	FALSE	FALSE	FALSE	FALSE	FALSE	Cytoplasm	5	14	CHEMBL1079175	MK-2206	FALSE	2	FALSE	KEGG	HIF-1 signaling pathway	9	0	2	2	0	0	1585
AKT1	ENSG00000142208	AKT serine/threonine kinase 1	1561	6	FALSE	TRUE	FALSE	TRUE	FALSE	FALSE	FALSE	FALSE	FALSE	FALSE	FALSE	FALSE	Cytoplasm	5	14	CHEMBL1079175	MK-2206	FALSE	2	FALSE	KEGG	HIF-1 signaling pathway	9	0	2	2	0	0	1585
AKT1	ENSG00000142208	AKT serine/threonine kinase 1	1561	6	FALSE	TRUE	FALSE	TRUE	FALSE	FALSE	FALSE	FALSE	FALSE	FALSE	FALSE	FALSE	Cytoplasm	5	14	CHEMBL2325741	CAPIVASERTIB	FALSE	3	FALSE	NCI	TCR signaling in na√Øve CD4+ T cells	9	0	2	2	0	0	1585
AKT1	ENSG00000142208	AKT serine/threonine kinase 1	1561	6	FALSE	TRUE	FALSE	TRUE	FALSE	FALSE	FALSE	FALSE	FALSE	FALSE	FALSE	FALSE	Cytoplasm	5	14	CHEMBL1079175	MK-2206	FALSE	2	FALSE	NCI	TCR signaling in na√Øve CD4+ T cells	9	0	2	2	0	0	1585
AKT1	ENSG00000142208	AKT serine/threonine kinase 1	1561	6	FALSE	TRUE	FALSE	TRUE	FALSE	FALSE	FALSE	FALSE	FALSE	FALSE	FALSE	FALSE	Cytoplasm	5	14	CHEMBL2325741	CAPIVASERTIB	FALSE	3	FALSE	NCI	TCR signaling in na√Øve CD4+ T cells	9	0	2	2	0	0	1585
AKT1	ENSG00000142208	AKT serine/threonine kinase 1	1561	6	FALSE	TRUE	FALSE	TRUE	FALSE	FALSE	FALSE	FALSE	FALSE	FALSE	FALSE	FALSE	Cytoplasm	5	14	CHEMBL2177390	IPATASERTIB	FALSE	3	FALSE	NCI	TCR signaling in na√Øve CD4+ T cells	9	0	2	2	0	0	1585
AKT1	ENSG00000142208	AKT serine/threonine kinase 1	1561	6	FALSE	TRUE	FALSE	TRUE	FALSE	FALSE	FALSE	FALSE	FALSE	FALSE	FALSE	FALSE	Cytoplasm	5	14	CHEMBL1079175	MK-2206	FALSE	2	FALSE	NCI	TCR signaling in na√Øve CD4+ T cells	9	0	2	2	0	0	1585
AKT1	ENSG00000142208	AKT serine/threonine kinase 1	1561	6	FALSE	TRUE	FALSE	TRUE	FALSE	FALSE	FALSE	FALSE	FALSE	FALSE	FALSE	FALSE	Cytoplasm	5	14	CHEMBL1079175	MK-2206	FALSE	2	FALSE	NCI	TCR signaling in na√Øve CD4+ T cells	9	0	2	2	0	0	1585
AKT1	ENSG00000142208	AKT serine/threonine kinase 1	1561	6	FALSE	TRUE	FALSE	TRUE	FALSE	FALSE	FALSE	FALSE	FALSE	FALSE	FALSE	FALSE	Cytoplasm	5	14	CHEMBL2325741	CAPIVASERTIB	FALSE	3	FALSE	NCI	TCR signaling in na√Øve CD4+ T cells	9	0	2	2	0	0	1585
AKT1	ENSG00000142208	AKT serine/threonine kinase 1	1561	6	FALSE	TRUE	FALSE	TRUE	FALSE	FALSE	FALSE	FALSE	FALSE	FALSE	FALSE	FALSE	Cytoplasm	5	14	CHEMBL2177390	IPATASERTIB	FALSE	3	FALSE	NCI	TCR signaling in na√Øve CD4+ T cells	9	0	2	2	0	0	1585
AKT1	ENSG00000142208	AKT serine/threonine kinase 1	1561	6	FALSE	TRUE	FALSE	TRUE	FALSE	FALSE	FALSE	FALSE	FALSE	FALSE	FALSE	FALSE	Cytoplasm	5	14	CHEMBL1079175	MK-2206	FALSE	2	FALSE	NCI	TCR signaling in na√Øve CD4+ T cells	9	0	2	2	0	0	1585
AKT1	ENSG00000142208	AKT serine/threonine kinase 1	1561	6	FALSE	TRUE	FALSE	TRUE	FALSE	FALSE	FALSE	FALSE	FALSE	FALSE	FALSE	FALSE	Cytoplasm	5	14	CHEMBL2325741	CAPIVASERTIB	FALSE	3	FALSE	Reactome	Mitotic G1-G1/S phases	9	0	2	2	0	0	1585
AKT1	ENSG00000142208	AKT serine/threonine kinase 1	1561	6	FALSE	TRUE	FALSE	TRUE	FALSE	FALSE	FALSE	FALSE	FALSE	FALSE	FALSE	FALSE	Cytoplasm	5	14	CHEMBL2177390	IPATASERTIB	FALSE	3	FALSE	Reactome	Mitotic G1-G1/S phases	9	0	2	2	0	0	1585
AKT1	ENSG00000142208	AKT serine/threonine kinase 1	1561	6	FALSE	TRUE	FALSE	TRUE	FALSE	FALSE	FALSE	FALSE	FALSE	FALSE	FALSE	FALSE	Cytoplasm	5	14	CHEMBL2325741	CAPIVASERTIB	FALSE	3	FALSE	Reactome	Mitotic G1-G1/S phases	9	0	2	2	0	0	1585
AKT1	ENSG00000142208	AKT serine/threonine kinase 1	1561	6	FALSE	TRUE	FALSE	TRUE	FALSE	FALSE	FALSE	FALSE	FALSE	FALSE	FALSE	FALSE	Cytoplasm	5	14	CHEMBL3137336	UPROSERTIB	FALSE	2	FALSE	Reactome	Mitotic G1-G1/S phases	9	0	2	2	0	0	1585
AKT1	ENSG00000142208	AKT serine/threonine kinase 1	1561	6	FALSE	TRUE	FALSE	TRUE	FALSE	FALSE	FALSE	FALSE	FALSE	FALSE	FALSE	FALSE	Cytoplasm	5	14	CHEMBL1079175	MK-2206	FALSE	2	FALSE	Reactome	Mitotic G1-G1/S phases	9	0	2	2	0	0	1585
AKT1	ENSG00000142208	AKT serine/threonine kinase 1	1561	6	FALSE	TRUE	FALSE	TRUE	FALSE	FALSE	FALSE	FALSE	FALSE	FALSE	FALSE	FALSE	Cytoplasm	5	14	CHEMBL1079175	MK-2206	FALSE	2	FALSE	Reactome	Mitotic G1-G1/S phases	9	0	2	2	0	0	1585
AKT1	ENSG00000142208	AKT serine/threonine kinase 1	1561	6	FALSE	TRUE	FALSE	TRUE	FALSE	FALSE	FALSE	FALSE	FALSE	FALSE	FALSE	FALSE	Cytoplasm	5	14	CHEMBL1079175	MK-2206	FALSE	2	FALSE	Reactome	Mitotic G1-G1/S phases	9	0	2	2	0	0	1585
AKT1	ENSG00000142208	AKT serine/threonine kinase 1	1561	6	FALSE	TRUE	FALSE	TRUE	FALSE	FALSE	FALSE	FALSE	FALSE	FALSE	FALSE	FALSE	Cytoplasm	5	14	CHEMBL2177390	IPATASERTIB	FALSE	3	FALSE	KEGG	HIF-1 signaling pathway	9	0	2	2	0	0	1585
AKT1	ENSG00000142208	AKT serine/threonine kinase 1	1561	6	FALSE	TRUE	FALSE	TRUE	FALSE	FALSE	FALSE	FALSE	FALSE	FALSE	FALSE	FALSE	Cytoplasm	5	14	CHEMBL2177390	IPATASERTIB	FALSE	3	FALSE	KEGG	HIF-1 signaling pathway	9	0	2	2	0	0	1585
AKT1	ENSG00000142208	AKT serine/threonine kinase 1	1561	6	FALSE	TRUE	FALSE	TRUE	FALSE	FALSE	FALSE	FALSE	FALSE	FALSE	FALSE	FALSE	Cytoplasm	5	14	CHEMBL2325741	CAPIVASERTIB	FALSE	3	FALSE	KEGG	HIF-1 signaling pathway	9	0	2	2	0	0	1585
AKT1	ENSG00000142208	AKT serine/threonine kinase 1	1561	6	FALSE	TRUE	FALSE	TRUE	FALSE	FALSE	FALSE	FALSE	FALSE	FALSE	FALSE	FALSE	Cytoplasm	5	14	CHEMBL2325741	CAPIVASERTIB	FALSE	3	FALSE	KEGG	HIF-1 signaling pathway	9	0	2	2	0	0	1585
AKT1	ENSG00000142208	AKT serine/threonine kinase 1	1561	6	FALSE	TRUE	FALSE	TRUE	FALSE	FALSE	FALSE	FALSE	FALSE	FALSE	FALSE	FALSE	Cytoplasm	5	14	CHEMBL2177390	IPATASERTIB	FALSE	3	FALSE	KEGG	HIF-1 signaling pathway	9	0	2	2	0	0	1585
AKT1	ENSG00000142208	AKT serine/threonine kinase 1	1561	6	FALSE	TRUE	FALSE	TRUE	FALSE	FALSE	FALSE	FALSE	FALSE	FALSE	FALSE	FALSE	Cytoplasm	5	14	CHEMBL2325741	CAPIVASERTIB	FALSE	3	FALSE	Reactome	Mitotic G1-G1/S phases	9	0	2	2	0	0	1585
AKT1	ENSG00000142208	AKT serine/threonine kinase 1	1561	6	FALSE	TRUE	FALSE	TRUE	FALSE	FALSE	FALSE	FALSE	FALSE	FALSE	FALSE	FALSE	Cytoplasm	5	14	CHEMBL1079175	MK-2206	FALSE	2	FALSE	Reactome	Mitotic G1-G1/S phases	9	0	2	2	0	0	1585
AKT1	ENSG00000142208	AKT serine/threonine kinase 1	1561	6	FALSE	TRUE	FALSE	TRUE	FALSE	FALSE	FALSE	FALSE	FALSE	FALSE	FALSE	FALSE	Cytoplasm	5	14	CHEMBL2325741	CAPIVASERTIB	FALSE	3	FALSE	Reactome	Mitotic G1-G1/S phases	9	0	2	2	0	0	1585
AKT1	ENSG00000142208	AKT serine/threonine kinase 1	1561	6	FALSE	TRUE	FALSE	TRUE	FALSE	FALSE	FALSE	FALSE	FALSE	FALSE	FALSE	FALSE	Cytoplasm	5	14	CHEMBL2177390	IPATASERTIB	FALSE	3	FALSE	Reactome	Mitotic G1-G1/S phases	9	0	2	2	0	0	1585
AKT1	ENSG00000142208	AKT serine/threonine kinase 1	1561	6	FALSE	TRUE	FALSE	TRUE	FALSE	FALSE	FALSE	FALSE	FALSE	FALSE	FALSE	FALSE	Cytoplasm	5	14	CHEMBL1079175	MK-2206	FALSE	2	FALSE	Reactome	Mitotic G1-G1/S phases	9	0	2	2	0	0	1585
AKT1	ENSG00000142208	AKT serine/threonine kinase 1	1561	6	FALSE	TRUE	FALSE	TRUE	FALSE	FALSE	FALSE	FALSE	FALSE	FALSE	FALSE	FALSE	Cytoplasm	5	14	CHEMBL1079175	MK-2206	FALSE	2	FALSE	Reactome	Mitotic G1-G1/S phases	9	0	2	2	0	0	1585
AKT1	ENSG00000142208	AKT serine/threonine kinase 1	1561	6	FALSE	TRUE	FALSE	TRUE	FALSE	FALSE	FALSE	FALSE	FALSE	FALSE	FALSE	FALSE	Cytoplasm	5	14	CHEMBL2325741	CAPIVASERTIB	FALSE	3	FALSE	Reactome	Mitotic G1-G1/S phases	9	0	2	2	0	0	1585
AKT1	ENSG00000142208	AKT serine/threonine kinase 1	1561	6	FALSE	TRUE	FALSE	TRUE	FALSE	FALSE	FALSE	FALSE	FALSE	FALSE	FALSE	FALSE	Cytoplasm	5	14	CHEMBL2177390	IPATASERTIB	FALSE	3	FALSE	Reactome	Mitotic G1-G1/S phases	9	0	2	2	0	0	1585
AKT1	ENSG00000142208	AKT serine/threonine kinase 1	1561	6	FALSE	TRUE	FALSE	TRUE	FALSE	FALSE	FALSE	FALSE	FALSE	FALSE	FALSE	FALSE	Cytoplasm	5	14	CHEMBL1079175	MK-2206	FALSE	2	FALSE	Reactome	Mitotic G1-G1/S phases	9	0	2	2	0	0	1585
AKT1	ENSG00000142208	AKT serine/threonine kinase 1	1561	6	FALSE	TRUE	FALSE	TRUE	FALSE	FALSE	FALSE	FALSE	FALSE	FALSE	FALSE	FALSE	Cytoplasm	5	14	CHEMBL2325741	CAPIVASERTIB	FALSE	3	FALSE	Reactome	G1/S Transition	9	0	2	2	0	0	1585
AKT1	ENSG00000142208	AKT serine/threonine kinase 1	1561	6	FALSE	TRUE	FALSE	TRUE	FALSE	FALSE	FALSE	FALSE	FALSE	FALSE	FALSE	FALSE	Cytoplasm	5	14	CHEMBL1079175	MK-2206	FALSE	2	FALSE	Reactome	G1/S Transition	9	0	2	2	0	0	1585
AKT1	ENSG00000142208	AKT serine/threonine kinase 1	1561	6	FALSE	TRUE	FALSE	TRUE	FALSE	FALSE	FALSE	FALSE	FALSE	FALSE	FALSE	FALSE	Cytoplasm	5	14	CHEMBL2325741	CAPIVASERTIB	FALSE	3	FALSE	Reactome	G1/S Transition	9	0	2	2	0	0	1585
AKT1	ENSG00000142208	AKT serine/threonine kinase 1	1561	6	FALSE	TRUE	FALSE	TRUE	FALSE	FALSE	FALSE	FALSE	FALSE	FALSE	FALSE	FALSE	Cytoplasm	5	14	CHEMBL2177390	IPATASERTIB	FALSE	3	FALSE	Reactome	G1/S Transition	9	0	2	2	0	0	1585
AKT1	ENSG00000142208	AKT serine/threonine kinase 1	1561	6	FALSE	TRUE	FALSE	TRUE	FALSE	FALSE	FALSE	FALSE	FALSE	FALSE	FALSE	FALSE	Cytoplasm	5	14	CHEMBL2177390	IPATASERTIB	FALSE	3	FALSE	KEGG	HIF-1 signaling pathway	9	0	2	2	0	0	1585
AKT1	ENSG00000142208	AKT serine/threonine kinase 1	1561	6	FALSE	TRUE	FALSE	TRUE	FALSE	FALSE	FALSE	FALSE	FALSE	FALSE	FALSE	FALSE	Cytoplasm	5	14	CHEMBL1079175	MK-2206	FALSE	2	FALSE	KEGG	HIF-1 signaling pathway	9	0	2	2	0	0	1585
AKT1	ENSG00000142208	AKT serine/threonine kinase 1	1561	6	FALSE	TRUE	FALSE	TRUE	FALSE	FALSE	FALSE	FALSE	FALSE	FALSE	FALSE	FALSE	Cytoplasm	5	14	CHEMBL1079175	MK-2206	FALSE	2	FALSE	KEGG	HIF-1 signaling pathway	9	0	2	2	0	0	1585
AKT1	ENSG00000142208	AKT serine/threonine kinase 1	1561	6	FALSE	TRUE	FALSE	TRUE	FALSE	FALSE	FALSE	FALSE	FALSE	FALSE	FALSE	FALSE	Cytoplasm	5	14	CHEMBL2325741	CAPIVASERTIB	FALSE	3	FALSE	KEGG	HIF-1 signaling pathway	9	0	2	2	0	0	1585
AKT1	ENSG00000142208	AKT serine/threonine kinase 1	1561	6	FALSE	TRUE	FALSE	TRUE	FALSE	FALSE	FALSE	FALSE	FALSE	FALSE	FALSE	FALSE	Cytoplasm	5	14	CHEMBL2177390	IPATASERTIB	FALSE	3	FALSE	KEGG	HIF-1 signaling pathway	9	0	2	2	0	0	1585
AKT1	ENSG00000142208	AKT serine/threonine kinase 1	1561	6	FALSE	TRUE	FALSE	TRUE	FALSE	FALSE	FALSE	FALSE	FALSE	FALSE	FALSE	FALSE	Cytoplasm	5	14	CHEMBL2325741	CAPIVASERTIB	FALSE	3	FALSE	Reactome	Cytokine Signaling in Immune system	9	0	2	2	0	0	1585
AKT1	ENSG00000142208	AKT serine/threonine kinase 1	1561	6	FALSE	TRUE	FALSE	TRUE	FALSE	FALSE	FALSE	FALSE	FALSE	FALSE	FALSE	FALSE	Cytoplasm	5	14	CHEMBL2325741	CAPIVASERTIB	FALSE	3	FALSE	Reactome	Cytokine Signaling in Immune system	9	0	2	2	0	0	1585
AKT1	ENSG00000142208	AKT serine/threonine kinase 1	1561	6	FALSE	TRUE	FALSE	TRUE	FALSE	FALSE	FALSE	FALSE	FALSE	FALSE	FALSE	FALSE	Cytoplasm	5	14	CHEMBL2177390	IPATASERTIB	FALSE	3	FALSE	Reactome	Cytokine Signaling in Immune system	9	0	2	2	0	0	1585
AKT1	ENSG00000142208	AKT serine/threonine kinase 1	1561	6	FALSE	TRUE	FALSE	TRUE	FALSE	FALSE	FALSE	FALSE	FALSE	FALSE	FALSE	FALSE	Cytoplasm	5	14	CHEMBL2325741	CAPIVASERTIB	FALSE	3	FALSE	Reactome	Cytokine Signaling in Immune system	9	0	2	2	0	0	1585
AKT1	ENSG00000142208	AKT serine/threonine kinase 1	1561	6	FALSE	TRUE	FALSE	TRUE	FALSE	FALSE	FALSE	FALSE	FALSE	FALSE	FALSE	FALSE	Cytoplasm	5	14	CHEMBL3137336	UPROSERTIB	FALSE	2	FALSE	Reactome	Cytokine Signaling in Immune system	9	0	2	2	0	0	1585
AKT1	ENSG00000142208	AKT serine/threonine kinase 1	1561	6	FALSE	TRUE	FALSE	TRUE	FALSE	FALSE	FALSE	FALSE	FALSE	FALSE	FALSE	FALSE	Cytoplasm	5	14	CHEMBL1079175	MK-2206	FALSE	2	FALSE	Reactome	Cytokine Signaling in Immune system	9	0	2	2	0	0	1585
AKT1	ENSG00000142208	AKT serine/threonine kinase 1	1561	6	FALSE	TRUE	FALSE	TRUE	FALSE	FALSE	FALSE	FALSE	FALSE	FALSE	FALSE	FALSE	Cytoplasm	5	14	CHEMBL1079175	MK-2206	FALSE	2	FALSE	Reactome	Cytokine Signaling in Immune system	9	0	2	2	0	0	1585
AKT1	ENSG00000142208	AKT serine/threonine kinase 1	1561	6	FALSE	TRUE	FALSE	TRUE	FALSE	FALSE	FALSE	FALSE	FALSE	FALSE	FALSE	FALSE	Cytoplasm	5	14	CHEMBL1079175	MK-2206	FALSE	2	FALSE	Reactome	Cytokine Signaling in Immune system	9	0	2	2	0	0	1585
AKT1	ENSG00000142208	AKT serine/threonine kinase 1	1561	6	FALSE	TRUE	FALSE	TRUE	FALSE	FALSE	FALSE	FALSE	FALSE	FALSE	FALSE	FALSE	Cytoplasm	5	14	CHEMBL3137336	UPROSERTIB	FALSE	2	FALSE	Reactome	Cytokine Signaling in Immune system	9	0	2	2	0	0	1585
AKT1	ENSG00000142208	AKT serine/threonine kinase 1	1561	6	FALSE	TRUE	FALSE	TRUE	FALSE	FALSE	FALSE	FALSE	FALSE	FALSE	FALSE	FALSE	Cytoplasm	5	14	CHEMBL1079175	MK-2206	FALSE	2	FALSE	Reactome	Cytokine Signaling in Immune system	9	0	2	2	0	0	1585
AKT1	ENSG00000142208	AKT serine/threonine kinase 1	1561	6	FALSE	TRUE	FALSE	TRUE	FALSE	FALSE	FALSE	FALSE	FALSE	FALSE	FALSE	FALSE	Cytoplasm	5	14	CHEMBL3137336	UPROSERTIB	FALSE	2	FALSE	Reactome	Cytokine Signaling in Immune system	9	0	2	2	0	0	1585
AKT1	ENSG00000142208	AKT serine/threonine kinase 1	1561	6	FALSE	TRUE	FALSE	TRUE	FALSE	FALSE	FALSE	FALSE	FALSE	FALSE	FALSE	FALSE	Cytoplasm	5	14	CHEMBL2325741	CAPIVASERTIB	FALSE	3	FALSE	Reactome	Cytokine Signaling in Immune system	9	0	2	2	0	0	1585
AKT1	ENSG00000142208	AKT serine/threonine kinase 1	1561	6	FALSE	TRUE	FALSE	TRUE	FALSE	FALSE	FALSE	FALSE	FALSE	FALSE	FALSE	FALSE	Cytoplasm	5	14	CHEMBL2325741	CAPIVASERTIB	FALSE	3	FALSE	Reactome	Cytokine Signaling in Immune system	9	0	2	2	0	0	1585
AKT1	ENSG00000142208	AKT serine/threonine kinase 1	1561	6	FALSE	TRUE	FALSE	TRUE	FALSE	FALSE	FALSE	FALSE	FALSE	FALSE	FALSE	FALSE	Cytoplasm	5	14	CHEMBL2325741	CAPIVASERTIB	FALSE	3	FALSE	Reactome	Cytokine Signaling in Immune system	9	0	2	2	0	0	1585
AKT1	ENSG00000142208	AKT serine/threonine kinase 1	1561	6	FALSE	TRUE	FALSE	TRUE	FALSE	FALSE	FALSE	FALSE	FALSE	FALSE	FALSE	FALSE	Cytoplasm	5	14	CHEMBL1079175	MK-2206	FALSE	2	FALSE	Reactome	Cytokine Signaling in Immune system	9	0	2	2	0	0	1585
AKT1	ENSG00000142208	AKT serine/threonine kinase 1	1561	6	FALSE	TRUE	FALSE	TRUE	FALSE	FALSE	FALSE	FALSE	FALSE	FALSE	FALSE	FALSE	Cytoplasm	5	14	CHEMBL2325741	CAPIVASERTIB	FALSE	3	FALSE	Reactome	Cytokine Signaling in Immune system	9	0	2	2	0	0	1585
AKT1	ENSG00000142208	AKT serine/threonine kinase 1	1561	6	FALSE	TRUE	FALSE	TRUE	FALSE	FALSE	FALSE	FALSE	FALSE	FALSE	FALSE	FALSE	Cytoplasm	5	14	CHEMBL2177390	IPATASERTIB	FALSE	3	FALSE	Reactome	Cytokine Signaling in Immune system	9	0	2	2	0	0	1585
AKT1	ENSG00000142208	AKT serine/threonine kinase 1	1561	6	FALSE	TRUE	FALSE	TRUE	FALSE	FALSE	FALSE	FALSE	FALSE	FALSE	FALSE	FALSE	Cytoplasm	5	14	CHEMBL1079175	MK-2206	FALSE	2	FALSE	Reactome	Cytokine Signaling in Immune system	9	0	2	2	0	0	1585
AKT1	ENSG00000142208	AKT serine/threonine kinase 1	1561	6	FALSE	TRUE	FALSE	TRUE	FALSE	FALSE	FALSE	FALSE	FALSE	FALSE	FALSE	FALSE	Cytoplasm	5	14	CHEMBL1079175	MK-2206	FALSE	2	FALSE	Reactome	Cytokine Signaling in Immune system	9	0	2	2	0	0	1585
AKT1	ENSG00000142208	AKT serine/threonine kinase 1	1561	6	FALSE	TRUE	FALSE	TRUE	FALSE	FALSE	FALSE	FALSE	FALSE	FALSE	FALSE	FALSE	Cytoplasm	5	14	CHEMBL2325741	CAPIVASERTIB	FALSE	3	FALSE	Reactome	Cytokine Signaling in Immune system	9	0	2	2	0	0	1585
AKT1	ENSG00000142208	AKT serine/threonine kinase 1	1561	6	FALSE	TRUE	FALSE	TRUE	FALSE	FALSE	FALSE	FALSE	FALSE	FALSE	FALSE	FALSE	Cytoplasm	5	14	CHEMBL2177390	IPATASERTIB	FALSE	3	FALSE	Reactome	Cytokine Signaling in Immune system	9	0	2	2	0	0	1585
AKT1	ENSG00000142208	AKT serine/threonine kinase 1	1561	6	FALSE	TRUE	FALSE	TRUE	FALSE	FALSE	FALSE	FALSE	FALSE	FALSE	FALSE	FALSE	Cytoplasm	5	14	CHEMBL1079175	MK-2206	FALSE	2	FALSE	Reactome	Cytokine Signaling in Immune system	9	0	2	2	0	0	1585
AKT1	ENSG00000142208	AKT serine/threonine kinase 1	1561	6	FALSE	TRUE	FALSE	TRUE	FALSE	FALSE	FALSE	FALSE	FALSE	FALSE	FALSE	FALSE	Cytoplasm	5	14	CHEMBL3137336	UPROSERTIB	FALSE	2	FALSE	Reactome	G1/S Transition	9	0	2	2	0	0	1585
AKT1	ENSG00000142208	AKT serine/threonine kinase 1	1561	6	FALSE	TRUE	FALSE	TRUE	FALSE	FALSE	FALSE	FALSE	FALSE	FALSE	FALSE	FALSE	Cytoplasm	5	14	CHEMBL1079175	MK-2206	FALSE	2	FALSE	Reactome	G1/S Transition	9	0	2	2	0	0	1585
AKT1	ENSG00000142208	AKT serine/threonine kinase 1	1561	6	FALSE	TRUE	FALSE	TRUE	FALSE	FALSE	FALSE	FALSE	FALSE	FALSE	FALSE	FALSE	Cytoplasm	5	14	CHEMBL1079175	MK-2206	FALSE	2	FALSE	Reactome	G1/S Transition	9	0	2	2	0	0	1585
AKT1	ENSG00000142208	AKT serine/threonine kinase 1	1561	6	FALSE	TRUE	FALSE	TRUE	FALSE	FALSE	FALSE	FALSE	FALSE	FALSE	FALSE	FALSE	Cytoplasm	5	14	CHEMBL1079175	MK-2206	FALSE	2	FALSE	Reactome	G1/S Transition	9	0	2	2	0	0	1585
AKT1	ENSG00000142208	AKT serine/threonine kinase 1	1561	6	FALSE	TRUE	FALSE	TRUE	FALSE	FALSE	FALSE	FALSE	FALSE	FALSE	FALSE	FALSE	Cytoplasm	5	14	CHEMBL3137336	UPROSERTIB	FALSE	2	FALSE	Reactome	G1/S Transition	9	0	2	2	0	0	1585
AKT1	ENSG00000142208	AKT serine/threonine kinase 1	1561	6	FALSE	TRUE	FALSE	TRUE	FALSE	FALSE	FALSE	FALSE	FALSE	FALSE	FALSE	FALSE	Cytoplasm	5	14	CHEMBL1079175	MK-2206	FALSE	2	FALSE	Reactome	G1/S Transition	9	0	2	2	0	0	1585
AKT1	ENSG00000142208	AKT serine/threonine kinase 1	1561	6	FALSE	TRUE	FALSE	TRUE	FALSE	FALSE	FALSE	FALSE	FALSE	FALSE	FALSE	FALSE	Cytoplasm	5	14	CHEMBL3137336	UPROSERTIB	FALSE	2	FALSE	Reactome	G1/S Transition	9	0	2	2	0	0	1585
AKT1	ENSG00000142208	AKT serine/threonine kinase 1	1561	6	FALSE	TRUE	FALSE	TRUE	FALSE	FALSE	FALSE	FALSE	FALSE	FALSE	FALSE	FALSE	Cytoplasm	5	14	CHEMBL2325741	CAPIVASERTIB	FALSE	3	FALSE	Reactome	G1/S Transition	9	0	2	2	0	0	1585
AKT1	ENSG00000142208	AKT serine/threonine kinase 1	1561	6	FALSE	TRUE	FALSE	TRUE	FALSE	FALSE	FALSE	FALSE	FALSE	FALSE	FALSE	FALSE	Cytoplasm	5	14	CHEMBL2325741	CAPIVASERTIB	FALSE	3	FALSE	Reactome	G1/S Transition	9	0	2	2	0	0	1585
AKT1	ENSG00000142208	AKT serine/threonine kinase 1	1561	6	FALSE	TRUE	FALSE	TRUE	FALSE	FALSE	FALSE	FALSE	FALSE	FALSE	FALSE	FALSE	Cytoplasm	5	14	CHEMBL2325741	CAPIVASERTIB	FALSE	3	FALSE	KEGG	HIF-1 signaling pathway	9	0	2	2	0	0	1585
AKT1	ENSG00000142208	AKT serine/threonine kinase 1	1561	6	FALSE	TRUE	FALSE	TRUE	FALSE	FALSE	FALSE	FALSE	FALSE	FALSE	FALSE	FALSE	Cytoplasm	5	14	CHEMBL2325741	CAPIVASERTIB	FALSE	3	FALSE	KEGG	HIF-1 signaling pathway	9	0	2	2	0	0	1585
AKT1	ENSG00000142208	AKT serine/threonine kinase 1	1561	6	FALSE	TRUE	FALSE	TRUE	FALSE	FALSE	FALSE	FALSE	FALSE	FALSE	FALSE	FALSE	Cytoplasm	5	14	CHEMBL3137336	UPROSERTIB	FALSE	2	FALSE	Reactome	Transcriptional Regulation by TP53	9	0	2	2	0	0	1585
AKT1	ENSG00000142208	AKT serine/threonine kinase 1	1561	6	FALSE	TRUE	FALSE	TRUE	FALSE	FALSE	FALSE	FALSE	FALSE	FALSE	FALSE	FALSE	Cytoplasm	5	14	CHEMBL1079175	MK-2206	FALSE	2	FALSE	Reactome	Transcriptional Regulation by TP53	9	0	2	2	0	0	1585
AKT1	ENSG00000142208	AKT serine/threonine kinase 1	1561	6	FALSE	TRUE	FALSE	TRUE	FALSE	FALSE	FALSE	FALSE	FALSE	FALSE	FALSE	FALSE	Cytoplasm	5	14	CHEMBL1079175	MK-2206	FALSE	2	FALSE	Reactome	G1/S Transition	9	0	2	2	0	0	1585
AKT1	ENSG00000142208	AKT serine/threonine kinase 1	1561	6	FALSE	TRUE	FALSE	TRUE	FALSE	FALSE	FALSE	FALSE	FALSE	FALSE	FALSE	FALSE	Cytoplasm	5	14	CHEMBL1079175	MK-2206	FALSE	2	FALSE	Reactome	G1/S Transition	9	0	2	2	0	0	1585
AKT1	ENSG00000142208	AKT serine/threonine kinase 1	1561	6	FALSE	TRUE	FALSE	TRUE	FALSE	FALSE	FALSE	FALSE	FALSE	FALSE	FALSE	FALSE	Cytoplasm	5	14	CHEMBL2325741	CAPIVASERTIB	FALSE	3	FALSE	Reactome	G1/S Transition	9	0	2	2	0	0	1585
AKT1	ENSG00000142208	AKT serine/threonine kinase 1	1561	6	FALSE	TRUE	FALSE	TRUE	FALSE	FALSE	FALSE	FALSE	FALSE	FALSE	FALSE	FALSE	Cytoplasm	5	14	CHEMBL2177390	IPATASERTIB	FALSE	3	FALSE	Reactome	G1/S Transition	9	0	2	2	0	0	1585
AKT1	ENSG00000142208	AKT serine/threonine kinase 1	1561	6	FALSE	TRUE	FALSE	TRUE	FALSE	FALSE	FALSE	FALSE	FALSE	FALSE	FALSE	FALSE	Cytoplasm	5	14	CHEMBL1079175	MK-2206	FALSE	2	FALSE	Reactome	G1/S Transition	9	0	2	2	0	0	1585
AKT1	ENSG00000142208	AKT serine/threonine kinase 1	1561	6	FALSE	TRUE	FALSE	TRUE	FALSE	FALSE	FALSE	FALSE	FALSE	FALSE	FALSE	FALSE	Cytoplasm	5	14	CHEMBL3137336	UPROSERTIB	FALSE	2	FALSE	NCI	TCR signaling in na√Øve CD8+ T cells	9	0	2	2	0	0	1585
AKT1	ENSG00000142208	AKT serine/threonine kinase 1	1561	6	FALSE	TRUE	FALSE	TRUE	FALSE	FALSE	FALSE	FALSE	FALSE	FALSE	FALSE	FALSE	Cytoplasm	5	14	CHEMBL2325741	CAPIVASERTIB	FALSE	3	FALSE	NCI	TCR signaling in na√Øve CD8+ T cells	9	0	2	2	0	0	1585
AKT1	ENSG00000142208	AKT serine/threonine kinase 1	1561	6	FALSE	TRUE	FALSE	TRUE	FALSE	FALSE	FALSE	FALSE	FALSE	FALSE	FALSE	FALSE	Cytoplasm	5	14	CHEMBL2325741	CAPIVASERTIB	FALSE	3	FALSE	NCI	TCR signaling in na√Øve CD8+ T cells	9	0	2	2	0	0	1585
AKT1	ENSG00000142208	AKT serine/threonine kinase 1	1561	6	FALSE	TRUE	FALSE	TRUE	FALSE	FALSE	FALSE	FALSE	FALSE	FALSE	FALSE	FALSE	Cytoplasm	5	14	CHEMBL2325741	CAPIVASERTIB	FALSE	3	FALSE	NCI	TCR signaling in na√Øve CD8+ T cells	9	0	2	2	0	0	1585
AKT1	ENSG00000142208	AKT serine/threonine kinase 1	1561	6	FALSE	TRUE	FALSE	TRUE	FALSE	FALSE	FALSE	FALSE	FALSE	FALSE	FALSE	FALSE	Cytoplasm	5	14	CHEMBL1079175	MK-2206	FALSE	2	FALSE	NCI	TCR signaling in na√Øve CD8+ T cells	9	0	2	2	0	0	1585
AKT1	ENSG00000142208	AKT serine/threonine kinase 1	1561	6	FALSE	TRUE	FALSE	TRUE	FALSE	FALSE	FALSE	FALSE	FALSE	FALSE	FALSE	FALSE	Cytoplasm	5	14	CHEMBL2325741	CAPIVASERTIB	FALSE	3	FALSE	NCI	TCR signaling in na√Øve CD8+ T cells	9	0	2	2	0	0	1585
AKT1	ENSG00000142208	AKT serine/threonine kinase 1	1561	6	FALSE	TRUE	FALSE	TRUE	FALSE	FALSE	FALSE	FALSE	FALSE	FALSE	FALSE	FALSE	Cytoplasm	5	14	CHEMBL2177390	IPATASERTIB	FALSE	3	FALSE	NCI	TCR signaling in na√Øve CD8+ T cells	9	0	2	2	0	0	1585
AKT1	ENSG00000142208	AKT serine/threonine kinase 1	1561	6	FALSE	TRUE	FALSE	TRUE	FALSE	FALSE	FALSE	FALSE	FALSE	FALSE	FALSE	FALSE	Cytoplasm	5	14	CHEMBL1079175	MK-2206	FALSE	2	FALSE	NCI	TCR signaling in na√Øve CD8+ T cells	9	0	2	2	0	0	1585
AKT1	ENSG00000142208	AKT serine/threonine kinase 1	1561	6	FALSE	TRUE	FALSE	TRUE	FALSE	FALSE	FALSE	FALSE	FALSE	FALSE	FALSE	FALSE	Cytoplasm	5	14	CHEMBL1079175	MK-2206	FALSE	2	FALSE	NCI	TCR signaling in na√Øve CD8+ T cells	9	0	2	2	0	0	1585
AKT1	ENSG00000142208	AKT serine/threonine kinase 1	1561	6	FALSE	TRUE	FALSE	TRUE	FALSE	FALSE	FALSE	FALSE	FALSE	FALSE	FALSE	FALSE	Cytoplasm	5	14	CHEMBL2325741	CAPIVASERTIB	FALSE	3	FALSE	NCI	TCR signaling in na√Øve CD8+ T cells	9	0	2	2	0	0	1585
AKT1	ENSG00000142208	AKT serine/threonine kinase 1	1561	6	FALSE	TRUE	FALSE	TRUE	FALSE	FALSE	FALSE	FALSE	FALSE	FALSE	FALSE	FALSE	Cytoplasm	5	14	CHEMBL2177390	IPATASERTIB	FALSE	3	FALSE	NCI	TCR signaling in na√Øve CD8+ T cells	9	0	2	2	0	0	1585
AKT1	ENSG00000142208	AKT serine/threonine kinase 1	1561	6	FALSE	TRUE	FALSE	TRUE	FALSE	FALSE	FALSE	FALSE	FALSE	FALSE	FALSE	FALSE	Cytoplasm	5	14	CHEMBL1079175	MK-2206	FALSE	2	FALSE	NCI	TCR signaling in na√Øve CD8+ T cells	9	0	2	2	0	0	1585
AKT1	ENSG00000142208	AKT serine/threonine kinase 1	1561	6	FALSE	TRUE	FALSE	TRUE	FALSE	FALSE	FALSE	FALSE	FALSE	FALSE	FALSE	FALSE	Cytoplasm	5	14	CHEMBL2325741	CAPIVASERTIB	FALSE	3	FALSE	Reactome	S Phase	9	0	2	2	0	0	1585
AKT1	ENSG00000142208	AKT serine/threonine kinase 1	1561	6	FALSE	TRUE	FALSE	TRUE	FALSE	FALSE	FALSE	FALSE	FALSE	FALSE	FALSE	FALSE	Cytoplasm	5	14	CHEMBL3137336	UPROSERTIB	FALSE	2	FALSE	Reactome	S Phase	9	0	2	2	0	0	1585
AKT1	ENSG00000142208	AKT serine/threonine kinase 1	1561	6	FALSE	TRUE	FALSE	TRUE	FALSE	FALSE	FALSE	FALSE	FALSE	FALSE	FALSE	FALSE	Cytoplasm	5	14	CHEMBL1079175	MK-2206	FALSE	2	FALSE	Reactome	S Phase	9	0	2	2	0	0	1585
AKT1	ENSG00000142208	AKT serine/threonine kinase 1	1561	6	FALSE	TRUE	FALSE	TRUE	FALSE	FALSE	FALSE	FALSE	FALSE	FALSE	FALSE	FALSE	Cytoplasm	5	14	CHEMBL1079175	MK-2206	FALSE	2	FALSE	Reactome	S Phase	9	0	2	2	0	0	1585
AKT1	ENSG00000142208	AKT serine/threonine kinase 1	1561	6	FALSE	TRUE	FALSE	TRUE	FALSE	FALSE	FALSE	FALSE	FALSE	FALSE	FALSE	FALSE	Cytoplasm	5	14	CHEMBL1079175	MK-2206	FALSE	2	FALSE	Reactome	S Phase	9	0	2	2	0	0	1585
AKT1	ENSG00000142208	AKT serine/threonine kinase 1	1561	6	FALSE	TRUE	FALSE	TRUE	FALSE	FALSE	FALSE	FALSE	FALSE	FALSE	FALSE	FALSE	Cytoplasm	5	14	CHEMBL3137336	UPROSERTIB	FALSE	2	FALSE	Reactome	S Phase	9	0	2	2	0	0	1585
AKT1	ENSG00000142208	AKT serine/threonine kinase 1	1561	6	FALSE	TRUE	FALSE	TRUE	FALSE	FALSE	FALSE	FALSE	FALSE	FALSE	FALSE	FALSE	Cytoplasm	5	14	CHEMBL1079175	MK-2206	FALSE	2	FALSE	Reactome	S Phase	9	0	2	2	0	0	1585
AKT1	ENSG00000142208	AKT serine/threonine kinase 1	1561	6	FALSE	TRUE	FALSE	TRUE	FALSE	FALSE	FALSE	FALSE	FALSE	FALSE	FALSE	FALSE	Cytoplasm	5	14	CHEMBL3137336	UPROSERTIB	FALSE	2	FALSE	Reactome	S Phase	9	0	2	2	0	0	1585
AKT1	ENSG00000142208	AKT serine/threonine kinase 1	1561	6	FALSE	TRUE	FALSE	TRUE	FALSE	FALSE	FALSE	FALSE	FALSE	FALSE	FALSE	FALSE	Cytoplasm	5	14	CHEMBL2325741	CAPIVASERTIB	FALSE	3	FALSE	Reactome	S Phase	9	0	2	2	0	0	1585
AKT1	ENSG00000142208	AKT serine/threonine kinase 1	1561	6	FALSE	TRUE	FALSE	TRUE	FALSE	FALSE	FALSE	FALSE	FALSE	FALSE	FALSE	FALSE	Cytoplasm	5	14	CHEMBL2325741	CAPIVASERTIB	FALSE	3	FALSE	Reactome	S Phase	9	0	2	2	0	0	1585
AKT1	ENSG00000142208	AKT serine/threonine kinase 1	1561	6	FALSE	TRUE	FALSE	TRUE	FALSE	FALSE	FALSE	FALSE	FALSE	FALSE	FALSE	FALSE	Cytoplasm	5	14	CHEMBL2325741	CAPIVASERTIB	FALSE	3	FALSE	Reactome	S Phase	9	0	2	2	0	0	1585
AKT1	ENSG00000142208	AKT serine/threonine kinase 1	1561	6	FALSE	TRUE	FALSE	TRUE	FALSE	FALSE	FALSE	FALSE	FALSE	FALSE	FALSE	FALSE	Cytoplasm	5	14	CHEMBL1079175	MK-2206	FALSE	2	FALSE	Reactome	S Phase	9	0	2	2	0	0	1585
AKT1	ENSG00000142208	AKT serine/threonine kinase 1	1561	6	FALSE	TRUE	FALSE	TRUE	FALSE	FALSE	FALSE	FALSE	FALSE	FALSE	FALSE	FALSE	Cytoplasm	5	14	CHEMBL2325741	CAPIVASERTIB	FALSE	3	FALSE	Reactome	S Phase	9	0	2	2	0	0	1585
AKT1	ENSG00000142208	AKT serine/threonine kinase 1	1561	6	FALSE	TRUE	FALSE	TRUE	FALSE	FALSE	FALSE	FALSE	FALSE	FALSE	FALSE	FALSE	Cytoplasm	5	14	CHEMBL2177390	IPATASERTIB	FALSE	3	FALSE	Reactome	S Phase	9	0	2	2	0	0	1585
AKT1	ENSG00000142208	AKT serine/threonine kinase 1	1561	6	FALSE	TRUE	FALSE	TRUE	FALSE	FALSE	FALSE	FALSE	FALSE	FALSE	FALSE	FALSE	Cytoplasm	5	14	CHEMBL2177390	IPATASERTIB	FALSE	3	FALSE	Reactome	Transcriptional Regulation by TP53	9	0	2	2	0	0	1585
AKT1	ENSG00000142208	AKT serine/threonine kinase 1	1561	6	FALSE	TRUE	FALSE	TRUE	FALSE	FALSE	FALSE	FALSE	FALSE	FALSE	FALSE	FALSE	Cytoplasm	5	14	CHEMBL2177390	IPATASERTIB	FALSE	3	FALSE	Reactome	Transcriptional Regulation by TP53	9	0	2	2	0	0	1585
AKT1	ENSG00000142208	AKT serine/threonine kinase 1	1561	6	FALSE	TRUE	FALSE	TRUE	FALSE	FALSE	FALSE	FALSE	FALSE	FALSE	FALSE	FALSE	Cytoplasm	5	14	CHEMBL3137336	UPROSERTIB	FALSE	2	FALSE	KEGG	HIF-1 signaling pathway	9	0	2	2	0	0	1585
AKT1	ENSG00000142208	AKT serine/threonine kinase 1	1561	6	FALSE	TRUE	FALSE	TRUE	FALSE	FALSE	FALSE	FALSE	FALSE	FALSE	FALSE	FALSE	Cytoplasm	5	14	CHEMBL1079175	MK-2206	FALSE	2	FALSE	KEGG	HIF-1 signaling pathway	9	0	2	2	0	0	1585
AKT1	ENSG00000142208	AKT serine/threonine kinase 1	1561	6	FALSE	TRUE	FALSE	TRUE	FALSE	FALSE	FALSE	FALSE	FALSE	FALSE	FALSE	FALSE	Cytoplasm	5	14	CHEMBL3137336	UPROSERTIB	FALSE	2	FALSE	KEGG	HIF-1 signaling pathway	9	0	2	2	0	0	1585
AKT1	ENSG00000142208	AKT serine/threonine kinase 1	1561	6	FALSE	TRUE	FALSE	TRUE	FALSE	FALSE	FALSE	FALSE	FALSE	FALSE	FALSE	FALSE	Cytoplasm	5	14	CHEMBL2177390	IPATASERTIB	FALSE	3	FALSE	NCI	TCR signaling in na√Øve CD8+ T cells	9	0	2	2	0	0	1585
AKT1	ENSG00000142208	AKT serine/threonine kinase 1	1561	6	FALSE	TRUE	FALSE	TRUE	FALSE	FALSE	FALSE	FALSE	FALSE	FALSE	FALSE	FALSE	Cytoplasm	5	14	CHEMBL2177390	IPATASERTIB	FALSE	3	FALSE	NCI	TCR signaling in na√Øve CD8+ T cells	9	0	2	2	0	0	1585
AKT1	ENSG00000142208	AKT serine/threonine kinase 1	1561	6	FALSE	TRUE	FALSE	TRUE	FALSE	FALSE	FALSE	FALSE	FALSE	FALSE	FALSE	FALSE	Cytoplasm	5	14	CHEMBL2177390	IPATASERTIB	FALSE	3	FALSE	NCI	TCR signaling in na√Øve CD8+ T cells	9	0	2	2	0	0	1585
AKT1	ENSG00000142208	AKT serine/threonine kinase 1	1561	6	FALSE	TRUE	FALSE	TRUE	FALSE	FALSE	FALSE	FALSE	FALSE	FALSE	FALSE	FALSE	Cytoplasm	5	14	CHEMBL2325741	CAPIVASERTIB	FALSE	3	FALSE	NCI	TCR signaling in na√Øve CD8+ T cells	9	0	2	2	0	0	1585
AKT1	ENSG00000142208	AKT serine/threonine kinase 1	1561	6	FALSE	TRUE	FALSE	TRUE	FALSE	FALSE	FALSE	FALSE	FALSE	FALSE	FALSE	FALSE	Cytoplasm	5	14	CHEMBL1079175	MK-2206	FALSE	2	FALSE	Reactome	Transcriptional Regulation by TP53	9	0	2	2	0	0	1585
AKT1	ENSG00000142208	AKT serine/threonine kinase 1	1561	6	FALSE	TRUE	FALSE	TRUE	FALSE	FALSE	FALSE	FALSE	FALSE	FALSE	FALSE	FALSE	Cytoplasm	5	14	CHEMBL1079175	MK-2206	FALSE	2	FALSE	Reactome	Transcriptional Regulation by TP53	9	0	2	2	0	0	1585
AKT1	ENSG00000142208	AKT serine/threonine kinase 1	1561	6	FALSE	TRUE	FALSE	TRUE	FALSE	FALSE	FALSE	FALSE	FALSE	FALSE	FALSE	FALSE	Cytoplasm	5	14	CHEMBL3137336	UPROSERTIB	FALSE	2	FALSE	Reactome	Transcriptional Regulation by TP53	9	0	2	2	0	0	1585
AKT1	ENSG00000142208	AKT serine/threonine kinase 1	1561	6	FALSE	TRUE	FALSE	TRUE	FALSE	FALSE	FALSE	FALSE	FALSE	FALSE	FALSE	FALSE	Cytoplasm	5	14	CHEMBL1079175	MK-2206	FALSE	2	FALSE	Reactome	Transcriptional Regulation by TP53	9	0	2	2	0	0	1585
AKT1	ENSG00000142208	AKT serine/threonine kinase 1	1561	6	FALSE	TRUE	FALSE	TRUE	FALSE	FALSE	FALSE	FALSE	FALSE	FALSE	FALSE	FALSE	Cytoplasm	5	14	CHEMBL3137336	UPROSERTIB	FALSE	2	FALSE	Reactome	Transcriptional Regulation by TP53	9	0	2	2	0	0	1585
AKT1	ENSG00000142208	AKT serine/threonine kinase 1	1561	6	FALSE	TRUE	FALSE	TRUE	FALSE	FALSE	FALSE	FALSE	FALSE	FALSE	FALSE	FALSE	Cytoplasm	5	14	CHEMBL2325741	CAPIVASERTIB	FALSE	3	FALSE	Reactome	Transcriptional Regulation by TP53	9	0	2	2	0	0	1585
AKT1	ENSG00000142208	AKT serine/threonine kinase 1	1561	6	FALSE	TRUE	FALSE	TRUE	FALSE	FALSE	FALSE	FALSE	FALSE	FALSE	FALSE	FALSE	Cytoplasm	5	14	CHEMBL2325741	CAPIVASERTIB	FALSE	3	FALSE	Reactome	Transcriptional Regulation by TP53	9	0	2	2	0	0	1585
AKT1	ENSG00000142208	AKT serine/threonine kinase 1	1561	6	FALSE	TRUE	FALSE	TRUE	FALSE	FALSE	FALSE	FALSE	FALSE	FALSE	FALSE	FALSE	Cytoplasm	5	14	CHEMBL2325741	CAPIVASERTIB	FALSE	3	FALSE	Reactome	Transcriptional Regulation by TP53	9	0	2	2	0	0	1585
AKT1	ENSG00000142208	AKT serine/threonine kinase 1	1561	6	FALSE	TRUE	FALSE	TRUE	FALSE	FALSE	FALSE	FALSE	FALSE	FALSE	FALSE	FALSE	Cytoplasm	5	14	CHEMBL1079175	MK-2206	FALSE	2	FALSE	Reactome	Transcriptional Regulation by TP53	9	0	2	2	0	0	1585
AKT1	ENSG00000142208	AKT serine/threonine kinase 1	1561	6	FALSE	TRUE	FALSE	TRUE	FALSE	FALSE	FALSE	FALSE	FALSE	FALSE	FALSE	FALSE	Cytoplasm	5	14	CHEMBL2325741	CAPIVASERTIB	FALSE	3	FALSE	Reactome	Transcriptional Regulation by TP53	9	0	2	2	0	0	1585
AKT1	ENSG00000142208	AKT serine/threonine kinase 1	1561	6	FALSE	TRUE	FALSE	TRUE	FALSE	FALSE	FALSE	FALSE	FALSE	FALSE	FALSE	FALSE	Cytoplasm	5	14	CHEMBL2177390	IPATASERTIB	FALSE	3	FALSE	Reactome	Transcriptional Regulation by TP53	9	0	2	2	0	0	1585
AKT1	ENSG00000142208	AKT serine/threonine kinase 1	1561	6	FALSE	TRUE	FALSE	TRUE	FALSE	FALSE	FALSE	FALSE	FALSE	FALSE	FALSE	FALSE	Cytoplasm	5	14	CHEMBL1079175	MK-2206	FALSE	2	FALSE	Reactome	Transcriptional Regulation by TP53	9	0	2	2	0	0	1585
AKT1	ENSG00000142208	AKT serine/threonine kinase 1	1561	6	FALSE	TRUE	FALSE	TRUE	FALSE	FALSE	FALSE	FALSE	FALSE	FALSE	FALSE	FALSE	Cytoplasm	5	14	CHEMBL1079175	MK-2206	FALSE	2	FALSE	Reactome	Transcriptional Regulation by TP53	9	0	2	2	0	0	1585
AKT1	ENSG00000142208	AKT serine/threonine kinase 1	1561	6	FALSE	TRUE	FALSE	TRUE	FALSE	FALSE	FALSE	FALSE	FALSE	FALSE	FALSE	FALSE	Cytoplasm	5	14	CHEMBL2325741	CAPIVASERTIB	FALSE	3	FALSE	Reactome	Transcriptional Regulation by TP53	9	0	2	2	0	0	1585
AKT1	ENSG00000142208	AKT serine/threonine kinase 1	1561	6	FALSE	TRUE	FALSE	TRUE	FALSE	FALSE	FALSE	FALSE	FALSE	FALSE	FALSE	FALSE	Cytoplasm	5	14	CHEMBL2177390	IPATASERTIB	FALSE	3	FALSE	Reactome	Transcriptional Regulation by TP53	9	0	2	2	0	0	1585
AKT1	ENSG00000142208	AKT serine/threonine kinase 1	1561	6	FALSE	TRUE	FALSE	TRUE	FALSE	FALSE	FALSE	FALSE	FALSE	FALSE	FALSE	FALSE	Cytoplasm	5	14	CHEMBL1079175	MK-2206	FALSE	2	FALSE	Reactome	Transcriptional Regulation by TP53	9	0	2	2	0	0	1585
AKT1	ENSG00000142208	AKT serine/threonine kinase 1	1561	6	FALSE	TRUE	FALSE	TRUE	FALSE	FALSE	FALSE	FALSE	FALSE	FALSE	FALSE	FALSE	Cytoplasm	5	14	CHEMBL2177390	IPATASERTIB	FALSE	3	FALSE	Reactome	Mitotic G1-G1/S phases	9	0	2	2	0	0	1585
AKT1	ENSG00000142208	AKT serine/threonine kinase 1	1561	6	FALSE	TRUE	FALSE	TRUE	FALSE	FALSE	FALSE	FALSE	FALSE	FALSE	FALSE	FALSE	Cytoplasm	5	14	CHEMBL2325741	CAPIVASERTIB	FALSE	3	FALSE	Reactome	Mitotic G1-G1/S phases	9	0	2	2	0	0	1585
AKT1	ENSG00000142208	AKT serine/threonine kinase 1	1561	6	FALSE	TRUE	FALSE	TRUE	FALSE	FALSE	FALSE	FALSE	FALSE	FALSE	FALSE	FALSE	Cytoplasm	5	14	CHEMBL2325741	CAPIVASERTIB	FALSE	3	FALSE	Reactome	Regulation of TP53 Activity	9	0	2	2	0	0	1585
AKT1	ENSG00000142208	AKT serine/threonine kinase 1	1561	6	FALSE	TRUE	FALSE	TRUE	FALSE	FALSE	FALSE	FALSE	FALSE	FALSE	FALSE	FALSE	Cytoplasm	5	14	CHEMBL2325741	CAPIVASERTIB	FALSE	3	FALSE	Reactome	Regulation of TP53 Activity	9	0	2	2	0	0	1585
AKT1	ENSG00000142208	AKT serine/threonine kinase 1	1561	6	FALSE	TRUE	FALSE	TRUE	FALSE	FALSE	FALSE	FALSE	FALSE	FALSE	FALSE	FALSE	Cytoplasm	5	14	CHEMBL1079175	MK-2206	FALSE	2	FALSE	Reactome	Regulation of TP53 Activity	9	0	2	2	0	0	1585
AKT1	ENSG00000142208	AKT serine/threonine kinase 1	1561	6	FALSE	TRUE	FALSE	TRUE	FALSE	FALSE	FALSE	FALSE	FALSE	FALSE	FALSE	FALSE	Cytoplasm	5	14	CHEMBL2177390	IPATASERTIB	FALSE	3	FALSE	Reactome	G1/S Transition	9	0	2	2	0	0	1585
AKT1	ENSG00000142208	AKT serine/threonine kinase 1	1561	6	FALSE	TRUE	FALSE	TRUE	FALSE	FALSE	FALSE	FALSE	FALSE	FALSE	FALSE	FALSE	Cytoplasm	5	14	CHEMBL2177390	IPATASERTIB	FALSE	3	FALSE	Reactome	G1/S Transition	9	0	2	2	0	0	1585
AKT1	ENSG00000142208	AKT serine/threonine kinase 1	1561	6	FALSE	TRUE	FALSE	TRUE	FALSE	FALSE	FALSE	FALSE	FALSE	FALSE	FALSE	FALSE	Cytoplasm	5	14	CHEMBL2177390	IPATASERTIB	FALSE	3	FALSE	Reactome	G1/S Transition	9	0	2	2	0	0	1585
AKT1	ENSG00000142208	AKT serine/threonine kinase 1	1561	6	FALSE	TRUE	FALSE	TRUE	FALSE	FALSE	FALSE	FALSE	FALSE	FALSE	FALSE	FALSE	Cytoplasm	5	14	CHEMBL2325741	CAPIVASERTIB	FALSE	3	FALSE	Reactome	G1/S Transition	9	0	2	2	0	0	1585
AKT1	ENSG00000142208	AKT serine/threonine kinase 1	1561	6	FALSE	TRUE	FALSE	TRUE	FALSE	FALSE	FALSE	FALSE	FALSE	FALSE	FALSE	FALSE	Cytoplasm	5	14	CHEMBL3137336	UPROSERTIB	FALSE	2	FALSE	Reactome	Mitotic G1-G1/S phases	9	0	2	2	0	0	1585
AKT1	ENSG00000142208	AKT serine/threonine kinase 1	1561	6	FALSE	TRUE	FALSE	TRUE	FALSE	FALSE	FALSE	FALSE	FALSE	FALSE	FALSE	FALSE	Cytoplasm	5	14	CHEMBL1079175	MK-2206	FALSE	2	FALSE	Reactome	Mitotic G1-G1/S phases	9	0	2	2	0	0	1585
AKT1	ENSG00000142208	AKT serine/threonine kinase 1	1561	6	FALSE	TRUE	FALSE	TRUE	FALSE	FALSE	FALSE	FALSE	FALSE	FALSE	FALSE	FALSE	Cytoplasm	5	14	CHEMBL3137336	UPROSERTIB	FALSE	2	FALSE	Reactome	Mitotic G1-G1/S phases	9	0	2	2	0	0	1585
AKT1	ENSG00000142208	AKT serine/threonine kinase 1	1561	6	FALSE	TRUE	FALSE	TRUE	FALSE	FALSE	FALSE	FALSE	FALSE	FALSE	FALSE	FALSE	Cytoplasm	5	14	CHEMBL2325741	CAPIVASERTIB	FALSE	3	FALSE	Reactome	Mitotic G1-G1/S phases	9	0	2	2	0	0	1585
AKT1	ENSG00000142208	AKT serine/threonine kinase 1	1561	6	FALSE	TRUE	FALSE	TRUE	FALSE	FALSE	FALSE	FALSE	FALSE	FALSE	FALSE	FALSE	Cytoplasm	5	14	CHEMBL2325741	CAPIVASERTIB	FALSE	3	FALSE	Reactome	Mitotic G1-G1/S phases	9	0	2	2	0	0	1585
AKT1	ENSG00000142208	AKT serine/threonine kinase 1	1561	6	FALSE	TRUE	FALSE	TRUE	FALSE	FALSE	FALSE	FALSE	FALSE	FALSE	FALSE	FALSE	Cytoplasm	5	14	CHEMBL2177390	IPATASERTIB	FALSE	3	FALSE	Reactome	Cytokine Signaling in Immune system	9	0	2	2	0	0	1585
AKT1	ENSG00000142208	AKT serine/threonine kinase 1	1561	6	FALSE	TRUE	FALSE	TRUE	FALSE	FALSE	FALSE	FALSE	FALSE	FALSE	FALSE	FALSE	Cytoplasm	5	14	CHEMBL2177390	IPATASERTIB	FALSE	3	FALSE	Reactome	Cytokine Signaling in Immune system	9	0	2	2	0	0	1585
AKT1	ENSG00000142208	AKT serine/threonine kinase 1	1561	6	FALSE	TRUE	FALSE	TRUE	FALSE	FALSE	FALSE	FALSE	FALSE	FALSE	FALSE	FALSE	Cytoplasm	5	14	CHEMBL2177390	IPATASERTIB	FALSE	3	FALSE	Reactome	Cytokine Signaling in Immune system	9	0	2	2	0	0	1585
AKT1	ENSG00000142208	AKT serine/threonine kinase 1	1561	6	FALSE	TRUE	FALSE	TRUE	FALSE	FALSE	FALSE	FALSE	FALSE	FALSE	FALSE	FALSE	Cytoplasm	5	14	CHEMBL1079175	MK-2206	FALSE	2	FALSE	Reactome	S Phase	9	0	2	2	0	0	1585
AKT1	ENSG00000142208	AKT serine/threonine kinase 1	1561	6	FALSE	TRUE	FALSE	TRUE	FALSE	FALSE	FALSE	FALSE	FALSE	FALSE	FALSE	FALSE	Cytoplasm	5	14	CHEMBL2177390	IPATASERTIB	FALSE	3	FALSE	Reactome	Transcriptional Regulation by TP53	9	0	2	2	0	0	1585
AKT1	ENSG00000142208	AKT serine/threonine kinase 1	1561	6	FALSE	TRUE	FALSE	TRUE	FALSE	FALSE	FALSE	FALSE	FALSE	FALSE	FALSE	FALSE	Cytoplasm	5	14	CHEMBL2325741	CAPIVASERTIB	FALSE	3	FALSE	Reactome	Transcriptional Regulation by TP53	9	0	2	2	0	0	1585
AKT1	ENSG00000142208	AKT serine/threonine kinase 1	1561	6	FALSE	TRUE	FALSE	TRUE	FALSE	FALSE	FALSE	FALSE	FALSE	FALSE	FALSE	FALSE	Cytoplasm	5	14	CHEMBL2325741	CAPIVASERTIB	FALSE	3	FALSE	Reactome	Transcriptional Regulation by TP53	9	0	2	2	0	0	1585
AKT1	ENSG00000142208	AKT serine/threonine kinase 1	1561	6	FALSE	TRUE	FALSE	TRUE	FALSE	FALSE	FALSE	FALSE	FALSE	FALSE	FALSE	FALSE	Cytoplasm	5	14	CHEMBL2177390	IPATASERTIB	FALSE	3	FALSE	Reactome	Transcriptional Regulation by TP53	9	0	2	2	0	0	1585
AKT1	ENSG00000142208	AKT serine/threonine kinase 1	1561	6	FALSE	TRUE	FALSE	TRUE	FALSE	FALSE	FALSE	FALSE	FALSE	FALSE	FALSE	FALSE	Cytoplasm	5	14	CHEMBL2325741	CAPIVASERTIB	FALSE	3	FALSE	Reactome	Transcriptional Regulation by TP53	9	0	2	2	0	0	1585
AKT1	ENSG00000142208	AKT serine/threonine kinase 1	1561	6	FALSE	TRUE	FALSE	TRUE	FALSE	FALSE	FALSE	FALSE	FALSE	FALSE	FALSE	FALSE	Cytoplasm	5	14	CHEMBL2325741	CAPIVASERTIB	FALSE	3	FALSE	NCI	TCR signaling in na√Øve CD4+ T cells	9	0	2	2	0	0	1585
AKT1	ENSG00000142208	AKT serine/threonine kinase 1	1561	6	FALSE	TRUE	FALSE	TRUE	FALSE	FALSE	FALSE	FALSE	FALSE	FALSE	FALSE	FALSE	Cytoplasm	5	14	CHEMBL2325741	CAPIVASERTIB	FALSE	3	FALSE	NCI	TCR signaling in na√Øve CD8+ T cells	9	0	2	2	0	0	1585
AKT1	ENSG00000142208	AKT serine/threonine kinase 1	1561	6	FALSE	TRUE	FALSE	TRUE	FALSE	FALSE	FALSE	FALSE	FALSE	FALSE	FALSE	FALSE	Cytoplasm	5	14	CHEMBL2177390	IPATASERTIB	FALSE	3	FALSE	NCI	TCR signaling in na√Øve CD8+ T cells	9	0	2	2	0	0	1585
AKT1	ENSG00000142208	AKT serine/threonine kinase 1	1561	6	FALSE	TRUE	FALSE	TRUE	FALSE	FALSE	FALSE	FALSE	FALSE	FALSE	FALSE	FALSE	Cytoplasm	5	14	CHEMBL2177390	IPATASERTIB	FALSE	3	FALSE	Reactome	Regulation of TP53 Activity	9	0	2	2	0	0	1585
AKT1	ENSG00000142208	AKT serine/threonine kinase 1	1561	6	FALSE	TRUE	FALSE	TRUE	FALSE	FALSE	FALSE	FALSE	FALSE	FALSE	FALSE	FALSE	Cytoplasm	5	14	CHEMBL3137336	UPROSERTIB	FALSE	2	FALSE	Reactome	Regulation of TP53 Activity	9	0	2	2	0	0	1585
AKT1	ENSG00000142208	AKT serine/threonine kinase 1	1561	6	FALSE	TRUE	FALSE	TRUE	FALSE	FALSE	FALSE	FALSE	FALSE	FALSE	FALSE	FALSE	Cytoplasm	5	14	CHEMBL2325741	CAPIVASERTIB	FALSE	3	FALSE	Reactome	Regulation of TP53 Activity	9	0	2	2	0	0	1585
AKT1	ENSG00000142208	AKT serine/threonine kinase 1	1561	6	FALSE	TRUE	FALSE	TRUE	FALSE	FALSE	FALSE	FALSE	FALSE	FALSE	FALSE	FALSE	Cytoplasm	5	14	CHEMBL2177390	IPATASERTIB	FALSE	3	FALSE	Reactome	S Phase	9	0	2	2	0	0	1585
AKT1	ENSG00000142208	AKT serine/threonine kinase 1	1561	6	FALSE	TRUE	FALSE	TRUE	FALSE	FALSE	FALSE	FALSE	FALSE	FALSE	FALSE	FALSE	Cytoplasm	5	14	CHEMBL2325741	CAPIVASERTIB	FALSE	3	FALSE	Reactome	Regulation of TP53 Activity	9	0	2	2	0	0	1585
AKT1	ENSG00000142208	AKT serine/threonine kinase 1	1561	6	FALSE	TRUE	FALSE	TRUE	FALSE	FALSE	FALSE	FALSE	FALSE	FALSE	FALSE	FALSE	Cytoplasm	5	14	CHEMBL2325741	CAPIVASERTIB	FALSE	3	FALSE	Reactome	Regulation of TP53 Activity	9	0	2	2	0	0	1585
AKT1	ENSG00000142208	AKT serine/threonine kinase 1	1561	6	FALSE	TRUE	FALSE	TRUE	FALSE	FALSE	FALSE	FALSE	FALSE	FALSE	FALSE	FALSE	Cytoplasm	5	14	CHEMBL2177390	IPATASERTIB	FALSE	3	FALSE	Reactome	Regulation of TP53 Activity	9	0	2	2	0	0	1585
AKT1	ENSG00000142208	AKT serine/threonine kinase 1	1561	6	FALSE	TRUE	FALSE	TRUE	FALSE	FALSE	FALSE	FALSE	FALSE	FALSE	FALSE	FALSE	Cytoplasm	5	14	CHEMBL2325741	CAPIVASERTIB	FALSE	3	FALSE	Reactome	Regulation of TP53 Activity	9	0	2	2	0	0	1585
AKT1	ENSG00000142208	AKT serine/threonine kinase 1	1561	6	FALSE	TRUE	FALSE	TRUE	FALSE	FALSE	FALSE	FALSE	FALSE	FALSE	FALSE	FALSE	Cytoplasm	5	14	CHEMBL3137336	UPROSERTIB	FALSE	2	FALSE	Reactome	Regulation of TP53 Activity	9	0	2	2	0	0	1585
AKT1	ENSG00000142208	AKT serine/threonine kinase 1	1561	6	FALSE	TRUE	FALSE	TRUE	FALSE	FALSE	FALSE	FALSE	FALSE	FALSE	FALSE	FALSE	Cytoplasm	5	14	CHEMBL1079175	MK-2206	FALSE	2	FALSE	Reactome	Regulation of TP53 Activity	9	0	2	2	0	0	1585
AKT1	ENSG00000142208	AKT serine/threonine kinase 1	1561	6	FALSE	TRUE	FALSE	TRUE	FALSE	FALSE	FALSE	FALSE	FALSE	FALSE	FALSE	FALSE	Cytoplasm	5	14	CHEMBL1079175	MK-2206	FALSE	2	FALSE	Reactome	Regulation of TP53 Activity	9	0	2	2	0	0	1585
AKT1	ENSG00000142208	AKT serine/threonine kinase 1	1561	6	FALSE	TRUE	FALSE	TRUE	FALSE	FALSE	FALSE	FALSE	FALSE	FALSE	FALSE	FALSE	Cytoplasm	5	14	CHEMBL1079175	MK-2206	FALSE	2	FALSE	Reactome	Regulation of TP53 Activity	9	0	2	2	0	0	1585
AKT1	ENSG00000142208	AKT serine/threonine kinase 1	1561	6	FALSE	TRUE	FALSE	TRUE	FALSE	FALSE	FALSE	FALSE	FALSE	FALSE	FALSE	FALSE	Cytoplasm	5	14	CHEMBL3137336	UPROSERTIB	FALSE	2	FALSE	Reactome	Regulation of TP53 Activity	9	0	2	2	0	0	1585
AKT1	ENSG00000142208	AKT serine/threonine kinase 1	1561	6	FALSE	TRUE	FALSE	TRUE	FALSE	FALSE	FALSE	FALSE	FALSE	FALSE	FALSE	FALSE	Cytoplasm	5	14	CHEMBL1079175	MK-2206	FALSE	2	FALSE	Reactome	Regulation of TP53 Activity	9	0	2	2	0	0	1585
AKT1	ENSG00000142208	AKT serine/threonine kinase 1	1561	6	FALSE	TRUE	FALSE	TRUE	FALSE	FALSE	FALSE	FALSE	FALSE	FALSE	FALSE	FALSE	Cytoplasm	5	14	CHEMBL2325741	CAPIVASERTIB	FALSE	3	FALSE	NCI	TCR signaling in na√Øve CD8+ T cells	9	0	2	2	0	0	1585
AKT1	ENSG00000142208	AKT serine/threonine kinase 1	1561	6	FALSE	TRUE	FALSE	TRUE	FALSE	FALSE	FALSE	FALSE	FALSE	FALSE	FALSE	FALSE	Cytoplasm	5	14	CHEMBL3137336	UPROSERTIB	FALSE	2	FALSE	NCI	TCR signaling in na√Øve CD8+ T cells	9	0	2	2	0	0	1585
AKT1	ENSG00000142208	AKT serine/threonine kinase 1	1561	6	FALSE	TRUE	FALSE	TRUE	FALSE	FALSE	FALSE	FALSE	FALSE	FALSE	FALSE	FALSE	Cytoplasm	5	14	CHEMBL1079175	MK-2206	FALSE	2	FALSE	NCI	TCR signaling in na√Øve CD8+ T cells	9	0	2	2	0	0	1585
AKT1	ENSG00000142208	AKT serine/threonine kinase 1	1561	6	FALSE	TRUE	FALSE	TRUE	FALSE	FALSE	FALSE	FALSE	FALSE	FALSE	FALSE	FALSE	Cytoplasm	5	14	CHEMBL1079175	MK-2206	FALSE	2	FALSE	NCI	TCR signaling in na√Øve CD8+ T cells	9	0	2	2	0	0	1585
AKT1	ENSG00000142208	AKT serine/threonine kinase 1	1561	6	FALSE	TRUE	FALSE	TRUE	FALSE	FALSE	FALSE	FALSE	FALSE	FALSE	FALSE	FALSE	Cytoplasm	5	14	CHEMBL1079175	MK-2206	FALSE	2	FALSE	NCI	TCR signaling in na√Øve CD8+ T cells	9	0	2	2	0	0	1585
AKT1	ENSG00000142208	AKT serine/threonine kinase 1	1561	6	FALSE	TRUE	FALSE	TRUE	FALSE	FALSE	FALSE	FALSE	FALSE	FALSE	FALSE	FALSE	Cytoplasm	5	14	CHEMBL3137336	UPROSERTIB	FALSE	2	FALSE	NCI	TCR signaling in na√Øve CD8+ T cells	9	0	2	2	0	0	1585
AKT1	ENSG00000142208	AKT serine/threonine kinase 1	1561	6	FALSE	TRUE	FALSE	TRUE	FALSE	FALSE	FALSE	FALSE	FALSE	FALSE	FALSE	FALSE	Cytoplasm	5	14	CHEMBL2325741	CAPIVASERTIB	FALSE	3	FALSE	Reactome	Regulation of TP53 Activity	9	0	2	2	0	0	1585
AKT1	ENSG00000142208	AKT serine/threonine kinase 1	1561	6	FALSE	TRUE	FALSE	TRUE	FALSE	FALSE	FALSE	FALSE	FALSE	FALSE	FALSE	FALSE	Cytoplasm	5	14	CHEMBL2177390	IPATASERTIB	FALSE	3	FALSE	Reactome	Regulation of TP53 Activity	9	0	2	2	0	0	1585
AKT1	ENSG00000142208	AKT serine/threonine kinase 1	1561	6	FALSE	TRUE	FALSE	TRUE	FALSE	FALSE	FALSE	FALSE	FALSE	FALSE	FALSE	FALSE	Cytoplasm	5	14	CHEMBL1079175	MK-2206	FALSE	2	FALSE	Reactome	Regulation of TP53 Activity	9	0	2	2	0	0	1585
AKT1	ENSG00000142208	AKT serine/threonine kinase 1	1561	6	FALSE	TRUE	FALSE	TRUE	FALSE	FALSE	FALSE	FALSE	FALSE	FALSE	FALSE	FALSE	Cytoplasm	5	14	CHEMBL2325741	CAPIVASERTIB	FALSE	3	FALSE	Reactome	G1/S Transition	9	0	2	2	0	0	1585
AKT1	ENSG00000142208	AKT serine/threonine kinase 1	1561	6	FALSE	TRUE	FALSE	TRUE	FALSE	FALSE	FALSE	FALSE	FALSE	FALSE	FALSE	FALSE	Cytoplasm	5	14	CHEMBL2177390	IPATASERTIB	FALSE	3	FALSE	Reactome	G1/S Transition	9	0	2	2	0	0	1585
AKT1	ENSG00000142208	AKT serine/threonine kinase 1	1561	6	FALSE	TRUE	FALSE	TRUE	FALSE	FALSE	FALSE	FALSE	FALSE	FALSE	FALSE	FALSE	Cytoplasm	5	14	CHEMBL2325741	CAPIVASERTIB	FALSE	3	FALSE	Reactome	G1/S Transition	9	0	2	2	0	0	1585
AKT1	ENSG00000142208	AKT serine/threonine kinase 1	1561	6	FALSE	TRUE	FALSE	TRUE	FALSE	FALSE	FALSE	FALSE	FALSE	FALSE	FALSE	FALSE	Cytoplasm	5	14	CHEMBL1079175	MK-2206	FALSE	2	FALSE	Reactome	Regulation of TP53 Activity	9	0	2	2	0	0	1585
AKT1	ENSG00000142208	AKT serine/threonine kinase 1	1561	6	FALSE	TRUE	FALSE	TRUE	FALSE	FALSE	FALSE	FALSE	FALSE	FALSE	FALSE	FALSE	Cytoplasm	5	14	CHEMBL2177390	IPATASERTIB	FALSE	3	FALSE	Reactome	S Phase	9	0	2	2	0	0	1585
AKT1	ENSG00000142208	AKT serine/threonine kinase 1	1561	6	FALSE	TRUE	FALSE	TRUE	FALSE	FALSE	FALSE	FALSE	FALSE	FALSE	FALSE	FALSE	Cytoplasm	5	14	CHEMBL2325741	CAPIVASERTIB	FALSE	3	FALSE	Reactome	S Phase	9	0	2	2	0	0	1585
AKT1	ENSG00000142208	AKT serine/threonine kinase 1	1561	6	FALSE	TRUE	FALSE	TRUE	FALSE	FALSE	FALSE	FALSE	FALSE	FALSE	FALSE	FALSE	Cytoplasm	5	14	CHEMBL2325741	CAPIVASERTIB	FALSE	3	FALSE	Reactome	S Phase	9	0	2	2	0	0	1585
AKT1	ENSG00000142208	AKT serine/threonine kinase 1	1561	6	FALSE	TRUE	FALSE	TRUE	FALSE	FALSE	FALSE	FALSE	FALSE	FALSE	FALSE	FALSE	Cytoplasm	5	14	CHEMBL1079175	MK-2206	FALSE	2	FALSE	NCI	TCR signaling in na√Øve CD4+ T cells	9	0	2	2	0	0	1585
AKT1	ENSG00000142208	AKT serine/threonine kinase 1	1561	6	FALSE	TRUE	FALSE	TRUE	FALSE	FALSE	FALSE	FALSE	FALSE	FALSE	FALSE	FALSE	Cytoplasm	5	14	CHEMBL1079175	MK-2206	FALSE	2	FALSE	NCI	TCR signaling in na√Øve CD4+ T cells	9	0	2	2	0	0	1585
AKT1	ENSG00000142208	AKT serine/threonine kinase 1	1561	6	FALSE	TRUE	FALSE	TRUE	FALSE	FALSE	FALSE	FALSE	FALSE	FALSE	FALSE	FALSE	Cytoplasm	5	14	CHEMBL3137336	UPROSERTIB	FALSE	2	FALSE	NCI	TCR signaling in na√Øve CD4+ T cells	9	0	2	2	0	0	1585
AKT1	ENSG00000142208	AKT serine/threonine kinase 1	1561	6	FALSE	TRUE	FALSE	TRUE	FALSE	FALSE	FALSE	FALSE	FALSE	FALSE	FALSE	FALSE	Cytoplasm	5	14	CHEMBL1079175	MK-2206	FALSE	2	FALSE	Reactome	S Phase	9	0	2	2	0	0	1585
AKT1	ENSG00000142208	AKT serine/threonine kinase 1	1561	6	FALSE	TRUE	FALSE	TRUE	FALSE	FALSE	FALSE	FALSE	FALSE	FALSE	FALSE	FALSE	Cytoplasm	5	14	CHEMBL2177390	IPATASERTIB	FALSE	3	FALSE	NCI	TCR signaling in na√Øve CD4+ T cells	9	0	2	2	0	0	1585
AKT1	ENSG00000142208	AKT serine/threonine kinase 1	1561	6	FALSE	TRUE	FALSE	TRUE	FALSE	FALSE	FALSE	FALSE	FALSE	FALSE	FALSE	FALSE	Cytoplasm	5	14	CHEMBL2177390	IPATASERTIB	FALSE	3	FALSE	NCI	TCR signaling in na√Øve CD4+ T cells	9	0	2	2	0	0	1585
AKT1	ENSG00000142208	AKT serine/threonine kinase 1	1561	6	FALSE	TRUE	FALSE	TRUE	FALSE	FALSE	FALSE	FALSE	FALSE	FALSE	FALSE	FALSE	Cytoplasm	5	14	CHEMBL2177390	IPATASERTIB	FALSE	3	FALSE	NCI	TCR signaling in na√Øve CD4+ T cells	9	0	2	2	0	0	1585
AKT1	ENSG00000142208	AKT serine/threonine kinase 1	1561	6	FALSE	TRUE	FALSE	TRUE	FALSE	FALSE	FALSE	FALSE	FALSE	FALSE	FALSE	FALSE	Cytoplasm	5	14	CHEMBL2325741	CAPIVASERTIB	FALSE	3	FALSE	NCI	TCR signaling in na√Øve CD4+ T cells	9	0	2	2	0	0	1585
AKT1	ENSG00000142208	AKT serine/threonine kinase 1	1561	6	FALSE	TRUE	FALSE	TRUE	FALSE	FALSE	FALSE	FALSE	FALSE	FALSE	FALSE	FALSE	Cytoplasm	5	14	CHEMBL2177390	IPATASERTIB	FALSE	3	FALSE	NCI	TCR signaling in na√Øve CD4+ T cells	9	0	2	2	0	0	1585
AKT1	ENSG00000142208	AKT serine/threonine kinase 1	1561	6	FALSE	TRUE	FALSE	TRUE	FALSE	FALSE	FALSE	FALSE	FALSE	FALSE	FALSE	FALSE	Cytoplasm	5	14	CHEMBL2325741	CAPIVASERTIB	FALSE	3	FALSE	NCI	TCR signaling in na√Øve CD4+ T cells	9	0	2	2	0	0	1585
AKT1	ENSG00000142208	AKT serine/threonine kinase 1	1561	6	FALSE	TRUE	FALSE	TRUE	FALSE	FALSE	FALSE	FALSE	FALSE	FALSE	FALSE	FALSE	Cytoplasm	5	14	CHEMBL2177390	IPATASERTIB	FALSE	3	FALSE	Reactome	S Phase	9	0	2	2	0	0	1585
AKT1	ENSG00000142208	AKT serine/threonine kinase 1	1561	6	FALSE	TRUE	FALSE	TRUE	FALSE	FALSE	FALSE	FALSE	FALSE	FALSE	FALSE	FALSE	Cytoplasm	5	14	CHEMBL3137336	UPROSERTIB	FALSE	2	FALSE	NCI	TCR signaling in na√Øve CD4+ T cells	9	0	2	2	0	0	1585
AKT1	ENSG00000142208	AKT serine/threonine kinase 1	1561	6	FALSE	TRUE	FALSE	TRUE	FALSE	FALSE	FALSE	FALSE	FALSE	FALSE	FALSE	FALSE	Cytoplasm	5	14	CHEMBL1079175	MK-2206	FALSE	2	FALSE	NCI	TCR signaling in na√Øve CD4+ T cells	9	0	2	2	0	0	1585
AKT1	ENSG00000142208	AKT serine/threonine kinase 1	1561	6	FALSE	TRUE	FALSE	TRUE	FALSE	FALSE	FALSE	FALSE	FALSE	FALSE	FALSE	FALSE	Cytoplasm	5	14	CHEMBL2177390	IPATASERTIB	FALSE	3	FALSE	Reactome	Mitotic G1-G1/S phases	9	0	2	2	0	0	1585
AKT1	ENSG00000142208	AKT serine/threonine kinase 1	1561	6	FALSE	TRUE	FALSE	TRUE	FALSE	FALSE	FALSE	FALSE	FALSE	FALSE	FALSE	FALSE	Cytoplasm	5	14	CHEMBL2325741	CAPIVASERTIB	FALSE	3	FALSE	NCI	TCR signaling in na√Øve CD4+ T cells	9	0	2	2	0	0	1585
AKT1	ENSG00000142208	AKT serine/threonine kinase 1	1561	6	FALSE	TRUE	FALSE	TRUE	FALSE	FALSE	FALSE	FALSE	FALSE	FALSE	FALSE	FALSE	Cytoplasm	5	14	CHEMBL2177390	IPATASERTIB	FALSE	3	FALSE	Reactome	Regulation of TP53 Activity	9	0	2	2	0	0	1585
AKT1	ENSG00000142208	AKT serine/threonine kinase 1	1561	6	FALSE	TRUE	FALSE	TRUE	FALSE	FALSE	FALSE	FALSE	FALSE	FALSE	FALSE	FALSE	Cytoplasm	5	14	CHEMBL1079175	MK-2206	FALSE	2	FALSE	NCI	TCR signaling in na√Øve CD8+ T cells	9	0	2	2	0	0	1585
AKT1	ENSG00000142208	AKT serine/threonine kinase 1	1561	6	FALSE	TRUE	FALSE	TRUE	FALSE	FALSE	FALSE	FALSE	FALSE	FALSE	FALSE	FALSE	Cytoplasm	5	14	CHEMBL2325741	CAPIVASERTIB	FALSE	3	FALSE	NCI	TCR signaling in na√Øve CD4+ T cells	9	0	2	2	0	0	1585
AKT1	ENSG00000142208	AKT serine/threonine kinase 1	1561	6	FALSE	TRUE	FALSE	TRUE	FALSE	FALSE	FALSE	FALSE	FALSE	FALSE	FALSE	FALSE	Cytoplasm	5	14	CHEMBL2177390	IPATASERTIB	FALSE	3	FALSE	Reactome	S Phase	9	0	2	2	0	0	1585
AKT1	ENSG00000142208	AKT serine/threonine kinase 1	1561	6	FALSE	TRUE	FALSE	TRUE	FALSE	FALSE	FALSE	FALSE	FALSE	FALSE	FALSE	FALSE	Cytoplasm	5	14	CHEMBL2177390	IPATASERTIB	FALSE	3	FALSE	Reactome	Regulation of TP53 Activity	9	0	2	2	0	0	1585
AKT1	ENSG00000142208	AKT serine/threonine kinase 1	1561	6	FALSE	TRUE	FALSE	TRUE	FALSE	FALSE	FALSE	FALSE	FALSE	FALSE	FALSE	FALSE	Cytoplasm	5	14	CHEMBL1079175	MK-2206	FALSE	2	FALSE	Reactome	Regulation of TP53 Activity	9	0	2	2	0	0	1585
AKT1	ENSG00000142208	AKT serine/threonine kinase 1	1561	6	FALSE	TRUE	FALSE	TRUE	FALSE	FALSE	FALSE	FALSE	FALSE	FALSE	FALSE	FALSE	Cytoplasm	5	14	CHEMBL2177390	IPATASERTIB	FALSE	3	FALSE	Reactome	S Phase	9	0	2	2	0	0	1585
AKT1	ENSG00000142208	AKT serine/threonine kinase 1	1561	6	FALSE	TRUE	FALSE	TRUE	FALSE	FALSE	FALSE	FALSE	FALSE	FALSE	FALSE	FALSE	Cytoplasm	5	14	CHEMBL3137336	UPROSERTIB	FALSE	2	FALSE	NCI	TCR signaling in na√Øve CD4+ T cells	9	0	2	2	0	0	1585
AKT1	ENSG00000142208	AKT serine/threonine kinase 1	1561	6	FALSE	TRUE	FALSE	TRUE	FALSE	FALSE	FALSE	FALSE	FALSE	FALSE	FALSE	FALSE	Cytoplasm	5	14	CHEMBL2325741	CAPIVASERTIB	FALSE	3	FALSE	Reactome	S Phase	9	0	2	2	0	0	1585
AKT1	ENSG00000142208	AKT serine/threonine kinase 1	1561	6	FALSE	TRUE	FALSE	TRUE	FALSE	FALSE	FALSE	FALSE	FALSE	FALSE	FALSE	FALSE	Cytoplasm	5	14	CHEMBL1079175	MK-2206	FALSE	2	FALSE	Reactome	S Phase	9	0	2	2	0	0	1585
AKT1	ENSG00000142208	AKT serine/threonine kinase 1	1561	6	FALSE	TRUE	FALSE	TRUE	FALSE	FALSE	FALSE	FALSE	FALSE	FALSE	FALSE	FALSE	Cytoplasm	5	14	CHEMBL2177390	IPATASERTIB	FALSE	3	FALSE	Reactome	Mitotic G1-G1/S phases	9	0	2	2	0	0	1585
AKT1	ENSG00000142208	AKT serine/threonine kinase 1	1561	6	FALSE	TRUE	FALSE	TRUE	FALSE	FALSE	FALSE	FALSE	FALSE	FALSE	FALSE	FALSE	Cytoplasm	5	14	CHEMBL2325741	CAPIVASERTIB	FALSE	3	FALSE	Reactome	Regulation of TP53 Activity	9	0	2	2	0	0	1585
AKT1	ENSG00000142208	AKT serine/threonine kinase 1	1561	6	FALSE	TRUE	FALSE	TRUE	FALSE	FALSE	FALSE	FALSE	FALSE	FALSE	FALSE	FALSE	Cytoplasm	5	14	CHEMBL1079175	MK-2206	FALSE	2	FALSE	NCI	TCR signaling in na√Øve CD4+ T cells	9	0	2	2	0	0	1585
AKT1	ENSG00000142208	AKT serine/threonine kinase 1	1561	6	FALSE	TRUE	FALSE	TRUE	FALSE	FALSE	FALSE	FALSE	FALSE	FALSE	FALSE	FALSE	Cytoplasm	5	14	CHEMBL2177390	IPATASERTIB	FALSE	3	FALSE	Reactome	Regulation of TP53 Activity	9	0	2	2	0	0	1585
BCL2	ENSG00000171791	BCL2 apoptosis regulator	1534	4	TRUE	FALSE	FALSE	TRUE	FALSE	FALSE	FALSE	FALSE	FALSE	FALSE	TRUE	FALSE	Mitochondrion outer membrane	1	7	CHEMBL3137309	VENETOCLAX	TRUE	4	FALSE	Reactome	Cytokine Signaling in Immune system	2	1	4	0	0	1	1554
BCL2	ENSG00000171791	BCL2 apoptosis regulator	1534	4	TRUE	FALSE	FALSE	TRUE	FALSE	FALSE	FALSE	FALSE	FALSE	FALSE	TRUE	FALSE	Mitochondrion outer membrane	1	7	CHEMBL3137309	VENETOCLAX	TRUE	4	FALSE	Reactome	Cytokine Signaling in Immune system	2	1	4	0	0	1	1554
BCL2	ENSG00000171791	BCL2 apoptosis regulator	1534	4	TRUE	FALSE	FALSE	TRUE	FALSE	FALSE	FALSE	FALSE	FALSE	FALSE	TRUE	FALSE	Mitochondrion outer membrane	1	7	CHEMBL3137309	VENETOCLAX	TRUE	4	FALSE	Reactome	Cytokine Signaling in Immune system	2	1	4	0	0	1	1554
BCL2	ENSG00000171791	BCL2 apoptosis regulator	1534	4	TRUE	FALSE	FALSE	TRUE	FALSE	FALSE	FALSE	FALSE	FALSE	FALSE	TRUE	FALSE	Mitochondrion outer membrane	1	7	CHEMBL3137309	VENETOCLAX	TRUE	4	FALSE	KEGG	HIF-1 signaling pathway	2	1	4	0	0	1	1554
BCL2	ENSG00000171791	BCL2 apoptosis regulator	1534	4	TRUE	FALSE	FALSE	TRUE	FALSE	FALSE	FALSE	FALSE	FALSE	FALSE	TRUE	FALSE	Mitochondrion outer membrane	1	7	CHEMBL2109229	OBLIMERSEN SODIUM	FALSE	3	FALSE	Reactome	Cytokine Signaling in Immune system	2	1	4	0	0	1	1554
BCL2	ENSG00000171791	BCL2 apoptosis regulator	1534	4	TRUE	FALSE	FALSE	TRUE	FALSE	FALSE	FALSE	FALSE	FALSE	FALSE	TRUE	FALSE	Mitochondrion outer membrane	1	7	CHEMBL3137309	VENETOCLAX	TRUE	4	FALSE	KEGG	HIF-1 signaling pathway	2	1	4	0	0	1	1554
BCL2	ENSG00000171791	BCL2 apoptosis regulator	1534	4	TRUE	FALSE	FALSE	TRUE	FALSE	FALSE	FALSE	FALSE	FALSE	FALSE	TRUE	FALSE	Mitochondrion outer membrane	1	7	CHEMBL2109229	OBLIMERSEN SODIUM	FALSE	3	FALSE	Reactome	Cytokine Signaling in Immune system	2	1	4	0	0	1	1554
BCL2	ENSG00000171791	BCL2 apoptosis regulator	1534	4	TRUE	FALSE	FALSE	TRUE	FALSE	FALSE	FALSE	FALSE	FALSE	FALSE	TRUE	FALSE	Mitochondrion outer membrane	1	7	CHEMBL3137309	VENETOCLAX	TRUE	4	FALSE	Reactome	Cytokine Signaling in Immune system	2	1	4	0	0	1	1554
BCL2	ENSG00000171791	BCL2 apoptosis regulator	1534	4	TRUE	FALSE	FALSE	TRUE	FALSE	FALSE	FALSE	FALSE	FALSE	FALSE	TRUE	FALSE	Mitochondrion outer membrane	1	7	CHEMBL3137309	VENETOCLAX	TRUE	4	FALSE	KEGG	HIF-1 signaling pathway	2	1	4	0	0	1	1554
BCL2	ENSG00000171791	BCL2 apoptosis regulator	1534	4	TRUE	FALSE	FALSE	TRUE	FALSE	FALSE	FALSE	FALSE	FALSE	FALSE	TRUE	FALSE	Mitochondrion outer membrane	1	7	CHEMBL3137309	VENETOCLAX	TRUE	4	FALSE	Reactome	Cytokine Signaling in Immune system	2	1	4	0	0	1	1554
BCL2	ENSG00000171791	BCL2 apoptosis regulator	1534	4	TRUE	FALSE	FALSE	TRUE	FALSE	FALSE	FALSE	FALSE	FALSE	FALSE	TRUE	FALSE	Mitochondrion outer membrane	1	7	CHEMBL2107358	OBATOCLAX MESYLATE	FALSE	3	FALSE	KEGG	HIF-1 signaling pathway	2	1	4	0	0	1	1554
BCL2	ENSG00000171791	BCL2 apoptosis regulator	1534	4	TRUE	FALSE	FALSE	TRUE	FALSE	FALSE	FALSE	FALSE	FALSE	FALSE	TRUE	FALSE	Mitochondrion outer membrane	1	7	CHEMBL3137309	VENETOCLAX	TRUE	4	FALSE	KEGG	HIF-1 signaling pathway	2	1	4	0	0	1	1554
BCL2	ENSG00000171791	BCL2 apoptosis regulator	1534	4	TRUE	FALSE	FALSE	TRUE	FALSE	FALSE	FALSE	FALSE	FALSE	FALSE	TRUE	FALSE	Mitochondrion outer membrane	1	7	CHEMBL2109229	OBLIMERSEN SODIUM	FALSE	3	FALSE	Reactome	Cytokine Signaling in Immune system	2	1	4	0	0	1	1554
BCL2	ENSG00000171791	BCL2 apoptosis regulator	1534	4	TRUE	FALSE	FALSE	TRUE	FALSE	FALSE	FALSE	FALSE	FALSE	FALSE	TRUE	FALSE	Mitochondrion outer membrane	1	7	CHEMBL3137309	VENETOCLAX	TRUE	4	FALSE	Reactome	Cytokine Signaling in Immune system	2	1	4	0	0	1	1554
BCL2	ENSG00000171791	BCL2 apoptosis regulator	1534	4	TRUE	FALSE	FALSE	TRUE	FALSE	FALSE	FALSE	FALSE	FALSE	FALSE	TRUE	FALSE	Mitochondrion outer membrane	1	7	CHEMBL3137309	VENETOCLAX	TRUE	4	FALSE	KEGG	HIF-1 signaling pathway	2	1	4	0	0	1	1554
BCL2	ENSG00000171791	BCL2 apoptosis regulator	1534	4	TRUE	FALSE	FALSE	TRUE	FALSE	FALSE	FALSE	FALSE	FALSE	FALSE	TRUE	FALSE	Mitochondrion outer membrane	1	7	CHEMBL3137309	VENETOCLAX	TRUE	4	FALSE	Reactome	Cytokine Signaling in Immune system	2	1	4	0	0	1	1554
BCL2	ENSG00000171791	BCL2 apoptosis regulator	1534	4	TRUE	FALSE	FALSE	TRUE	FALSE	FALSE	FALSE	FALSE	FALSE	FALSE	TRUE	FALSE	Mitochondrion outer membrane	1	7	CHEMBL3137309	VENETOCLAX	TRUE	4	FALSE	KEGG	HIF-1 signaling pathway	2	1	4	0	0	1	1554
BCL2	ENSG00000171791	BCL2 apoptosis regulator	1534	4	TRUE	FALSE	FALSE	TRUE	FALSE	FALSE	FALSE	FALSE	FALSE	FALSE	TRUE	FALSE	Mitochondrion outer membrane	1	7	CHEMBL3137309	VENETOCLAX	TRUE	4	FALSE	KEGG	HIF-1 signaling pathway	2	1	4	0	0	1	1554
BCL2	ENSG00000171791	BCL2 apoptosis regulator	1534	4	TRUE	FALSE	FALSE	TRUE	FALSE	FALSE	FALSE	FALSE	FALSE	FALSE	TRUE	FALSE	Mitochondrion outer membrane	1	7	CHEMBL3137309	VENETOCLAX	TRUE	4	FALSE	KEGG	HIF-1 signaling pathway	2	1	4	0	0	1	1554
BCL2	ENSG00000171791	BCL2 apoptosis regulator	1534	4	TRUE	FALSE	FALSE	TRUE	FALSE	FALSE	FALSE	FALSE	FALSE	FALSE	TRUE	FALSE	Mitochondrion outer membrane	1	7	CHEMBL3137309	VENETOCLAX	TRUE	4	FALSE	KEGG	HIF-1 signaling pathway	2	1	4	0	0	1	1554
BCL2	ENSG00000171791	BCL2 apoptosis regulator	1534	4	TRUE	FALSE	FALSE	TRUE	FALSE	FALSE	FALSE	FALSE	FALSE	FALSE	TRUE	FALSE	Mitochondrion outer membrane	1	7	CHEMBL2109229	OBLIMERSEN SODIUM	FALSE	3	FALSE	KEGG	HIF-1 signaling pathway	2	1	4	0	0	1	1554
BCL2	ENSG00000171791	BCL2 apoptosis regulator	1534	4	TRUE	FALSE	FALSE	TRUE	FALSE	FALSE	FALSE	FALSE	FALSE	FALSE	TRUE	FALSE	Mitochondrion outer membrane	1	7	CHEMBL3137309	VENETOCLAX	TRUE	4	FALSE	KEGG	HIF-1 signaling pathway	2	1	4	0	0	1	1554
BCL2	ENSG00000171791	BCL2 apoptosis regulator	1534	4	TRUE	FALSE	FALSE	TRUE	FALSE	FALSE	FALSE	FALSE	FALSE	FALSE	TRUE	FALSE	Mitochondrion outer membrane	1	7	CHEMBL3137309	VENETOCLAX	TRUE	4	FALSE	Reactome	Cytokine Signaling in Immune system	2	1	4	0	0	1	1554
BCL2	ENSG00000171791	BCL2 apoptosis regulator	1534	4	TRUE	FALSE	FALSE	TRUE	FALSE	FALSE	FALSE	FALSE	FALSE	FALSE	TRUE	FALSE	Mitochondrion outer membrane	1	7	CHEMBL2107358	OBATOCLAX MESYLATE	FALSE	3	FALSE	Reactome	Cytokine Signaling in Immune system	2	1	4	0	0	1	1554
BCL2	ENSG00000171791	BCL2 apoptosis regulator	1534	4	TRUE	FALSE	FALSE	TRUE	FALSE	FALSE	FALSE	FALSE	FALSE	FALSE	TRUE	FALSE	Mitochondrion outer membrane	1	7	CHEMBL3137309	VENETOCLAX	TRUE	4	FALSE	Reactome	Cytokine Signaling in Immune system	2	1	4	0	0	1	1554
BCL2	ENSG00000171791	BCL2 apoptosis regulator	1534	4	TRUE	FALSE	FALSE	TRUE	FALSE	FALSE	FALSE	FALSE	FALSE	FALSE	TRUE	FALSE	Mitochondrion outer membrane	1	7	CHEMBL3137309	VENETOCLAX	TRUE	4	FALSE	KEGG	HIF-1 signaling pathway	2	1	4	0	0	1	1554
BCL2	ENSG00000171791	BCL2 apoptosis regulator	1534	4	TRUE	FALSE	FALSE	TRUE	FALSE	FALSE	FALSE	FALSE	FALSE	FALSE	TRUE	FALSE	Mitochondrion outer membrane	1	7	CHEMBL3137309	VENETOCLAX	TRUE	4	FALSE	Reactome	Cytokine Signaling in Immune system	2	1	4	0	0	1	1554
BCL2	ENSG00000171791	BCL2 apoptosis regulator	1534	4	TRUE	FALSE	FALSE	TRUE	FALSE	FALSE	FALSE	FALSE	FALSE	FALSE	TRUE	FALSE	Mitochondrion outer membrane	1	7	CHEMBL2109229	OBLIMERSEN SODIUM	FALSE	3	FALSE	KEGG	HIF-1 signaling pathway	2	1	4	0	0	1	1554
BCL2	ENSG00000171791	BCL2 apoptosis regulator	1534	4	TRUE	FALSE	FALSE	TRUE	FALSE	FALSE	FALSE	FALSE	FALSE	FALSE	TRUE	FALSE	Mitochondrion outer membrane	1	7	CHEMBL408194	OBATOCLAX	FALSE	3	FALSE	KEGG	HIF-1 signaling pathway	2	1	4	0	0	1	1554
BCL2	ENSG00000171791	BCL2 apoptosis regulator	1534	4	TRUE	FALSE	FALSE	TRUE	FALSE	FALSE	FALSE	FALSE	FALSE	FALSE	TRUE	FALSE	Mitochondrion outer membrane	1	7	CHEMBL3137309	VENETOCLAX	TRUE	4	FALSE	Reactome	Cytokine Signaling in Immune system	2	1	4	0	0	1	1554
BCL2	ENSG00000171791	BCL2 apoptosis regulator	1534	4	TRUE	FALSE	FALSE	TRUE	FALSE	FALSE	FALSE	FALSE	FALSE	FALSE	TRUE	FALSE	Mitochondrion outer membrane	1	7	CHEMBL2109229	OBLIMERSEN SODIUM	FALSE	3	FALSE	KEGG	HIF-1 signaling pathway	2	1	4	0	0	1	1554
BCL2	ENSG00000171791	BCL2 apoptosis regulator	1534	4	TRUE	FALSE	FALSE	TRUE	FALSE	FALSE	FALSE	FALSE	FALSE	FALSE	TRUE	FALSE	Mitochondrion outer membrane	1	7	CHEMBL3137309	VENETOCLAX	TRUE	4	FALSE	KEGG	HIF-1 signaling pathway	2	1	4	0	0	1	1554
BCL2	ENSG00000171791	BCL2 apoptosis regulator	1534	4	TRUE	FALSE	FALSE	TRUE	FALSE	FALSE	FALSE	FALSE	FALSE	FALSE	TRUE	FALSE	Mitochondrion outer membrane	1	7	CHEMBL443684	NAVITOCLAX	FALSE	3	FALSE	Reactome	Cytokine Signaling in Immune system	2	1	4	0	0	1	1554
BCL2	ENSG00000171791	BCL2 apoptosis regulator	1534	4	TRUE	FALSE	FALSE	TRUE	FALSE	FALSE	FALSE	FALSE	FALSE	FALSE	TRUE	FALSE	Mitochondrion outer membrane	1	7	CHEMBL3137309	VENETOCLAX	TRUE	4	FALSE	Reactome	Cytokine Signaling in Immune system	2	1	4	0	0	1	1554
BCL2	ENSG00000171791	BCL2 apoptosis regulator	1534	4	TRUE	FALSE	FALSE	TRUE	FALSE	FALSE	FALSE	FALSE	FALSE	FALSE	TRUE	FALSE	Mitochondrion outer membrane	1	7	CHEMBL3137309	VENETOCLAX	TRUE	4	FALSE	Reactome	Cytokine Signaling in Immune system	2	1	4	0	0	1	1554
BCL2	ENSG00000171791	BCL2 apoptosis regulator	1534	4	TRUE	FALSE	FALSE	TRUE	FALSE	FALSE	FALSE	FALSE	FALSE	FALSE	TRUE	FALSE	Mitochondrion outer membrane	1	7	CHEMBL3137309	VENETOCLAX	TRUE	4	FALSE	KEGG	HIF-1 signaling pathway	2	1	4	0	0	1	1554
BCL2	ENSG00000171791	BCL2 apoptosis regulator	1534	4	TRUE	FALSE	FALSE	TRUE	FALSE	FALSE	FALSE	FALSE	FALSE	FALSE	TRUE	FALSE	Mitochondrion outer membrane	1	7	CHEMBL3137309	VENETOCLAX	TRUE	4	FALSE	KEGG	HIF-1 signaling pathway	2	1	4	0	0	1	1554
BCL2	ENSG00000171791	BCL2 apoptosis regulator	1534	4	TRUE	FALSE	FALSE	TRUE	FALSE	FALSE	FALSE	FALSE	FALSE	FALSE	TRUE	FALSE	Mitochondrion outer membrane	1	7	CHEMBL408194	OBATOCLAX	FALSE	3	FALSE	Reactome	Cytokine Signaling in Immune system	2	1	4	0	0	1	1554
BCL2	ENSG00000171791	BCL2 apoptosis regulator	1534	4	TRUE	FALSE	FALSE	TRUE	FALSE	FALSE	FALSE	FALSE	FALSE	FALSE	TRUE	FALSE	Mitochondrion outer membrane	1	7	CHEMBL3137309	VENETOCLAX	TRUE	4	FALSE	Reactome	Cytokine Signaling in Immune system	2	1	4	0	0	1	1554
BCL2	ENSG00000171791	BCL2 apoptosis regulator	1534	4	TRUE	FALSE	FALSE	TRUE	FALSE	FALSE	FALSE	FALSE	FALSE	FALSE	TRUE	FALSE	Mitochondrion outer membrane	1	7	CHEMBL2109229	OBLIMERSEN SODIUM	FALSE	3	FALSE	Reactome	Cytokine Signaling in Immune system	2	1	4	0	0	1	1554
BCL2	ENSG00000171791	BCL2 apoptosis regulator	1534	4	TRUE	FALSE	FALSE	TRUE	FALSE	FALSE	FALSE	FALSE	FALSE	FALSE	TRUE	FALSE	Mitochondrion outer membrane	1	7	CHEMBL3137309	VENETOCLAX	TRUE	4	FALSE	KEGG	HIF-1 signaling pathway	2	1	4	0	0	1	1554
BCL2	ENSG00000171791	BCL2 apoptosis regulator	1534	4	TRUE	FALSE	FALSE	TRUE	FALSE	FALSE	FALSE	FALSE	FALSE	FALSE	TRUE	FALSE	Mitochondrion outer membrane	1	7	CHEMBL3137309	VENETOCLAX	TRUE	4	FALSE	KEGG	HIF-1 signaling pathway	2	1	4	0	0	1	1554
BCL2	ENSG00000171791	BCL2 apoptosis regulator	1534	4	TRUE	FALSE	FALSE	TRUE	FALSE	FALSE	FALSE	FALSE	FALSE	FALSE	TRUE	FALSE	Mitochondrion outer membrane	1	7	CHEMBL3137309	VENETOCLAX	TRUE	4	FALSE	Reactome	Cytokine Signaling in Immune system	2	1	4	0	0	1	1554
BCL2	ENSG00000171791	BCL2 apoptosis regulator	1534	4	TRUE	FALSE	FALSE	TRUE	FALSE	FALSE	FALSE	FALSE	FALSE	FALSE	TRUE	FALSE	Mitochondrion outer membrane	1	7	CHEMBL3137309	VENETOCLAX	TRUE	4	FALSE	KEGG	HIF-1 signaling pathway	2	1	4	0	0	1	1554
BCL2	ENSG00000171791	BCL2 apoptosis regulator	1534	4	TRUE	FALSE	FALSE	TRUE	FALSE	FALSE	FALSE	FALSE	FALSE	FALSE	TRUE	FALSE	Mitochondrion outer membrane	1	7	CHEMBL2109229	OBLIMERSEN SODIUM	FALSE	3	FALSE	Reactome	Cytokine Signaling in Immune system	2	1	4	0	0	1	1554
BCL2	ENSG00000171791	BCL2 apoptosis regulator	1534	4	TRUE	FALSE	FALSE	TRUE	FALSE	FALSE	FALSE	FALSE	FALSE	FALSE	TRUE	FALSE	Mitochondrion outer membrane	1	7	CHEMBL3137309	VENETOCLAX	TRUE	4	FALSE	Reactome	Cytokine Signaling in Immune system	2	1	4	0	0	1	1554
BCL2	ENSG00000171791	BCL2 apoptosis regulator	1534	4	TRUE	FALSE	FALSE	TRUE	FALSE	FALSE	FALSE	FALSE	FALSE	FALSE	TRUE	FALSE	Mitochondrion outer membrane	1	7	CHEMBL443684	NAVITOCLAX	FALSE	3	FALSE	KEGG	HIF-1 signaling pathway	2	1	4	0	0	1	1554
BCL2	ENSG00000171791	BCL2 apoptosis regulator	1534	4	TRUE	FALSE	FALSE	TRUE	FALSE	FALSE	FALSE	FALSE	FALSE	FALSE	TRUE	FALSE	Mitochondrion outer membrane	1	7	CHEMBL3137309	VENETOCLAX	TRUE	4	FALSE	Reactome	Cytokine Signaling in Immune system	2	1	4	0	0	1	1554
BCL2	ENSG00000171791	BCL2 apoptosis regulator	1534	4	TRUE	FALSE	FALSE	TRUE	FALSE	FALSE	FALSE	FALSE	FALSE	FALSE	TRUE	FALSE	Mitochondrion outer membrane	1	7	CHEMBL2109229	OBLIMERSEN SODIUM	FALSE	3	FALSE	KEGG	HIF-1 signaling pathway	2	1	4	0	0	1	1554
BCL2	ENSG00000171791	BCL2 apoptosis regulator	1534	4	TRUE	FALSE	FALSE	TRUE	FALSE	FALSE	FALSE	FALSE	FALSE	FALSE	TRUE	FALSE	Mitochondrion outer membrane	1	7	CHEMBL2109229	OBLIMERSEN SODIUM	FALSE	3	FALSE	KEGG	HIF-1 signaling pathway	2	1	4	0	0	1	1554
IGF1	ENSG00000017427	insulin like growth factor 1	1489	3	FALSE	FALSE	FALSE	FALSE	FALSE	TRUE	FALSE	FALSE	FALSE	FALSE	FALSE	FALSE	Secreted	1	2	CHEMBL4297850	XENTUZUMAB	FALSE	2	FALSE	KEGG	HIF-1 signaling pathway	1	0	0	2	0	0	1495
IGF1	ENSG00000017427	insulin like growth factor 1	1489	3	FALSE	FALSE	FALSE	FALSE	FALSE	TRUE	FALSE	FALSE	FALSE	FALSE	FALSE	FALSE	Secreted	1	2	CHEMBL4297850	XENTUZUMAB	FALSE	2	FALSE	KEGG	HIF-1 signaling pathway	1	0	0	2	0	0	1495
IGF1	ENSG00000017427	insulin like growth factor 1	1489	3	FALSE	FALSE	FALSE	FALSE	FALSE	TRUE	FALSE	FALSE	FALSE	FALSE	FALSE	FALSE	Secreted	1	2	CHEMBL2109355	DUSIGITUMAB	FALSE	2	FALSE	KEGG	HIF-1 signaling pathway	1	0	0	2	0	0	1495
IGF1	ENSG00000017427	insulin like growth factor 1	1489	3	FALSE	FALSE	FALSE	FALSE	FALSE	TRUE	FALSE	FALSE	FALSE	FALSE	FALSE	FALSE	Secreted	1	2	CHEMBL4297850	XENTUZUMAB	FALSE	2	FALSE	KEGG	HIF-1 signaling pathway	1	0	0	2	0	0	1495
IGF1	ENSG00000017427	insulin like growth factor 1	1489	3	FALSE	FALSE	FALSE	FALSE	FALSE	TRUE	FALSE	FALSE	FALSE	FALSE	FALSE	FALSE	Secreted	1	2	CHEMBL4297850	XENTUZUMAB	FALSE	2	FALSE	KEGG	HIF-1 signaling pathway	1	0	0	2	0	0	1495
IGF1	ENSG00000017427	insulin like growth factor 1	1489	3	FALSE	FALSE	FALSE	FALSE	FALSE	TRUE	FALSE	FALSE	FALSE	FALSE	FALSE	FALSE	Secreted	1	2	CHEMBL2109355	DUSIGITUMAB	FALSE	2	FALSE	KEGG	HIF-1 signaling pathway	1	0	0	2	0	0	1495
IGF1	ENSG00000017427	insulin like growth factor 1	1489	3	FALSE	FALSE	FALSE	FALSE	FALSE	TRUE	FALSE	FALSE	FALSE	FALSE	FALSE	FALSE	Secreted	1	2	CHEMBL4297850	XENTUZUMAB	FALSE	2	FALSE	KEGG	HIF-1 signaling pathway	1	0	0	2	0	0	1495
IGF1	ENSG00000017427	insulin like growth factor 1	1489	3	FALSE	FALSE	FALSE	FALSE	FALSE	TRUE	FALSE	FALSE	FALSE	FALSE	FALSE	FALSE	Secreted	1	2	CHEMBL4297850	XENTUZUMAB	FALSE	2	FALSE	KEGG	HIF-1 signaling pathway	1	0	0	2	0	0	1495
IGF1	ENSG00000017427	insulin like growth factor 1	1489	3	FALSE	FALSE	FALSE	FALSE	FALSE	TRUE	FALSE	FALSE	FALSE	FALSE	FALSE	FALSE	Secreted	1	2	CHEMBL4297850	XENTUZUMAB	FALSE	2	FALSE	KEGG	HIF-1 signaling pathway	1	0	0	2	0	0	1495
IGF1	ENSG00000017427	insulin like growth factor 1	1489	3	FALSE	FALSE	FALSE	FALSE	FALSE	TRUE	FALSE	FALSE	FALSE	FALSE	FALSE	FALSE	Secreted	1	2	CHEMBL2109355	DUSIGITUMAB	FALSE	2	FALSE	KEGG	HIF-1 signaling pathway	1	0	0	2	0	0	1495
CXCL8	ENSG00000169429	C-X-C motif chemokine ligand 8	1457	5	FALSE	FALSE	FALSE	TRUE	FALSE	TRUE	FALSE	FALSE	FALSE	FALSE	FALSE	FALSE	Secreted	1	2	CHEMBL2109617	HUMAX-IL8	FALSE	2	FALSE	Reactome	Cytokine Signaling in Immune system	1	0	0	2	0	0	1465
CXCL8	ENSG00000169429	C-X-C motif chemokine ligand 8	1457	5	FALSE	FALSE	FALSE	TRUE	FALSE	TRUE	FALSE	FALSE	FALSE	FALSE	FALSE	FALSE	Secreted	1	2	CHEMBL2109617	HUMAX-IL8	FALSE	2	FALSE	Reactome	Cytokine Signaling in Immune system	1	0	0	2	0	0	1465
CXCL8	ENSG00000169429	C-X-C motif chemokine ligand 8	1457	5	FALSE	FALSE	FALSE	TRUE	FALSE	TRUE	FALSE	FALSE	FALSE	FALSE	FALSE	FALSE	Secreted	1	2	CHEMBL2109617	HUMAX-IL8	FALSE	2	FALSE	Reactome	Cytokine Signaling in Immune system	1	0	0	2	0	0	1465
CXCL8	ENSG00000169429	C-X-C motif chemokine ligand 8	1457	5	FALSE	FALSE	FALSE	TRUE	FALSE	TRUE	FALSE	FALSE	FALSE	FALSE	FALSE	FALSE	Secreted	1	2	CHEMBL2109616	ABX-IL8	FALSE	2	FALSE	Reactome	Cytokine Signaling in Immune system	1	0	0	2	0	0	1465
CXCL8	ENSG00000169429	C-X-C motif chemokine ligand 8	1457	5	FALSE	FALSE	FALSE	TRUE	FALSE	TRUE	FALSE	FALSE	FALSE	FALSE	FALSE	FALSE	Secreted	1	2	CHEMBL2109617	HUMAX-IL8	FALSE	2	FALSE	Reactome	Cytokine Signaling in Immune system	1	0	0	2	0	0	1465
CXCL8	ENSG00000169429	C-X-C motif chemokine ligand 8	1457	5	FALSE	FALSE	FALSE	TRUE	FALSE	TRUE	FALSE	FALSE	FALSE	FALSE	FALSE	FALSE	Secreted	1	2	CHEMBL2109617	HUMAX-IL8	FALSE	2	FALSE	Reactome	Cytokine Signaling in Immune system	1	0	0	2	0	0	1465
CXCL8	ENSG00000169429	C-X-C motif chemokine ligand 8	1457	5	FALSE	FALSE	FALSE	TRUE	FALSE	TRUE	FALSE	FALSE	FALSE	FALSE	FALSE	FALSE	Secreted	1	2	CHEMBL2109617	HUMAX-IL8	FALSE	2	FALSE	Reactome	Cytokine Signaling in Immune system	1	0	0	2	0	0	1465
CXCL8	ENSG00000169429	C-X-C motif chemokine ligand 8	1457	5	FALSE	FALSE	FALSE	TRUE	FALSE	TRUE	FALSE	FALSE	FALSE	FALSE	FALSE	FALSE	Secreted	1	2	CHEMBL2109617	HUMAX-IL8	FALSE	2	FALSE	Reactome	Cytokine Signaling in Immune system	1	0	0	2	0	0	1465
CXCL8	ENSG00000169429	C-X-C motif chemokine ligand 8	1457	5	FALSE	FALSE	FALSE	TRUE	FALSE	TRUE	FALSE	FALSE	FALSE	FALSE	FALSE	FALSE	Secreted	1	2	CHEMBL2109617	HUMAX-IL8	FALSE	2	FALSE	Reactome	Cytokine Signaling in Immune system	1	0	0	2	0	0	1465
CXCL8	ENSG00000169429	C-X-C motif chemokine ligand 8	1457	5	FALSE	FALSE	FALSE	TRUE	FALSE	TRUE	FALSE	FALSE	FALSE	FALSE	FALSE	FALSE	Secreted	1	2	CHEMBL2109617	HUMAX-IL8	FALSE	2	FALSE	Reactome	Cytokine Signaling in Immune system	1	0	0	2	0	0	1465
TLR4	ENSG00000136869	toll like receptor 4	1334	5	FALSE	TRUE	FALSE	TRUE	FALSE	FALSE	FALSE	FALSE	FALSE	FALSE	FALSE	FALSE	Cell membrane	0	3	CHEMBL225157	RESATORVID	FALSE	3	FALSE	KEGG	HIF-1 signaling pathway	1	0	3	0	0	0	1347.5
TLR4	ENSG00000136869	toll like receptor 4	1334	5	FALSE	TRUE	FALSE	TRUE	FALSE	FALSE	FALSE	FALSE	FALSE	FALSE	FALSE	FALSE	Cell membrane	0	3	CHEMBL501259	ERITORAN	FALSE	3	FALSE	KEGG	HIF-1 signaling pathway	1	0	3	0	0	0	1347.5
TLR4	ENSG00000136869	toll like receptor 4	1334	5	FALSE	TRUE	FALSE	TRUE	FALSE	FALSE	FALSE	FALSE	FALSE	FALSE	FALSE	FALSE	Cell membrane	0	3	CHEMBL3301672	ERITORAN TETRASODIUM	FALSE	3	FALSE	KEGG	HIF-1 signaling pathway	1	0	3	0	0	0	1347.5
TLR4	ENSG00000136869	toll like receptor 4	1334	5	FALSE	TRUE	FALSE	TRUE	FALSE	FALSE	FALSE	FALSE	FALSE	FALSE	FALSE	FALSE	Cell membrane	0	3	CHEMBL501259	ERITORAN	FALSE	3	FALSE	KEGG	HIF-1 signaling pathway	1	0	3	0	0	0	1347.5
TLR4	ENSG00000136869	toll like receptor 4	1334	5	FALSE	TRUE	FALSE	TRUE	FALSE	FALSE	FALSE	FALSE	FALSE	FALSE	FALSE	FALSE	Cell membrane	0	3	CHEMBL501259	ERITORAN	FALSE	3	FALSE	KEGG	HIF-1 signaling pathway	1	0	3	0	0	0	1347.5
TLR4	ENSG00000136869	toll like receptor 4	1334	5	FALSE	TRUE	FALSE	TRUE	FALSE	FALSE	FALSE	FALSE	FALSE	FALSE	FALSE	FALSE	Cell membrane	0	3	CHEMBL225157	RESATORVID	FALSE	3	FALSE	KEGG	HIF-1 signaling pathway	1	0	3	0	0	0	1347.5
TLR4	ENSG00000136869	toll like receptor 4	1334	5	FALSE	TRUE	FALSE	TRUE	FALSE	FALSE	FALSE	FALSE	FALSE	FALSE	FALSE	FALSE	Cell membrane	0	3	CHEMBL501259	ERITORAN	FALSE	3	FALSE	KEGG	HIF-1 signaling pathway	1	0	3	0	0	0	1347.5
TLR4	ENSG00000136869	toll like receptor 4	1334	5	FALSE	TRUE	FALSE	TRUE	FALSE	FALSE	FALSE	FALSE	FALSE	FALSE	FALSE	FALSE	Cell membrane	0	3	CHEMBL501259	ERITORAN	FALSE	3	FALSE	KEGG	HIF-1 signaling pathway	1	0	3	0	0	0	1347.5
TLR4	ENSG00000136869	toll like receptor 4	1334	5	FALSE	TRUE	FALSE	TRUE	FALSE	FALSE	FALSE	FALSE	FALSE	FALSE	FALSE	FALSE	Cell membrane	0	3	CHEMBL501259	ERITORAN	FALSE	3	FALSE	KEGG	HIF-1 signaling pathway	1	0	3	0	0	0	1347.5
TLR4	ENSG00000136869	toll like receptor 4	1334	5	FALSE	TRUE	FALSE	TRUE	FALSE	FALSE	FALSE	FALSE	FALSE	FALSE	FALSE	FALSE	Cell membrane	0	3	CHEMBL3301672	ERITORAN TETRASODIUM	FALSE	3	FALSE	KEGG	HIF-1 signaling pathway	1	0	3	0	0	0	1347.5
TLR4	ENSG00000136869	toll like receptor 4	1334	5	FALSE	TRUE	FALSE	TRUE	FALSE	FALSE	FALSE	FALSE	FALSE	FALSE	FALSE	FALSE	Cell membrane	0	3	CHEMBL225157	RESATORVID	FALSE	3	FALSE	KEGG	HIF-1 signaling pathway	1	0	3	0	0	0	1347.5
IL17A	ENSG00000112115	interleukin 17A	1322	3	FALSE	FALSE	FALSE	FALSE	TRUE	FALSE	FALSE	FALSE	FALSE	FALSE	TRUE	FALSE	Secreted	0	9	CHEMBL1743068	SECUKINUMAB	TRUE	4	FALSE	Reactome	Cytokine Signaling in Immune system	1	2	0	0	0	2	1341
IL17A	ENSG00000112115	interleukin 17A	1322	3	FALSE	FALSE	FALSE	FALSE	TRUE	FALSE	FALSE	FALSE	FALSE	FALSE	TRUE	FALSE	Secreted	0	9	CHEMBL1743034	IXEKIZUMAB	TRUE	4	FALSE	Reactome	Cytokine Signaling in Immune system	1	2	0	0	0	2	1341
IL17A	ENSG00000112115	interleukin 17A	1322	3	FALSE	FALSE	FALSE	FALSE	TRUE	FALSE	FALSE	FALSE	FALSE	FALSE	TRUE	FALSE	Secreted	0	9	CHEMBL1743068	SECUKINUMAB	TRUE	4	FALSE	Reactome	Cytokine Signaling in Immune system	1	2	0	0	0	2	1341
IL17A	ENSG00000112115	interleukin 17A	1322	3	FALSE	FALSE	FALSE	FALSE	TRUE	FALSE	FALSE	FALSE	FALSE	FALSE	TRUE	FALSE	Secreted	0	9	CHEMBL1743068	SECUKINUMAB	TRUE	4	FALSE	Reactome	Cytokine Signaling in Immune system	1	2	0	0	0	2	1341
IL17A	ENSG00000112115	interleukin 17A	1322	3	FALSE	FALSE	FALSE	FALSE	TRUE	FALSE	FALSE	FALSE	FALSE	FALSE	TRUE	FALSE	Secreted	0	9	CHEMBL1743068	SECUKINUMAB	TRUE	4	FALSE	Reactome	Cytokine Signaling in Immune system	1	2	0	0	0	2	1341
IL17A	ENSG00000112115	interleukin 17A	1322	3	FALSE	FALSE	FALSE	FALSE	TRUE	FALSE	FALSE	FALSE	FALSE	FALSE	TRUE	FALSE	Secreted	0	9	CHEMBL1743068	SECUKINUMAB	TRUE	4	FALSE	Reactome	Cytokine Signaling in Immune system	1	2	0	0	0	2	1341
IL17A	ENSG00000112115	interleukin 17A	1322	3	FALSE	FALSE	FALSE	FALSE	TRUE	FALSE	FALSE	FALSE	FALSE	FALSE	TRUE	FALSE	Secreted	0	9	CHEMBL1743068	SECUKINUMAB	TRUE	4	FALSE	Reactome	Cytokine Signaling in Immune system	1	2	0	0	0	2	1341
IL17A	ENSG00000112115	interleukin 17A	1322	3	FALSE	FALSE	FALSE	FALSE	TRUE	FALSE	FALSE	FALSE	FALSE	FALSE	TRUE	FALSE	Secreted	0	9	CHEMBL1743068	SECUKINUMAB	TRUE	4	FALSE	Reactome	Cytokine Signaling in Immune system	1	2	0	0	0	2	1341
IL17A	ENSG00000112115	interleukin 17A	1322	3	FALSE	FALSE	FALSE	FALSE	TRUE	FALSE	FALSE	FALSE	FALSE	FALSE	TRUE	FALSE	Secreted	0	9	CHEMBL1743034	IXEKIZUMAB	TRUE	4	FALSE	Reactome	Cytokine Signaling in Immune system	1	2	0	0	0	2	1341
IL17A	ENSG00000112115	interleukin 17A	1322	3	FALSE	FALSE	FALSE	FALSE	TRUE	FALSE	FALSE	FALSE	FALSE	FALSE	TRUE	FALSE	Secreted	0	9	CHEMBL1743034	IXEKIZUMAB	TRUE	4	FALSE	Reactome	Cytokine Signaling in Immune system	1	2	0	0	0	2	1341
IL17A	ENSG00000112115	interleukin 17A	1322	3	FALSE	FALSE	FALSE	FALSE	TRUE	FALSE	FALSE	FALSE	FALSE	FALSE	TRUE	FALSE	Secreted	0	9	CHEMBL1743068	SECUKINUMAB	TRUE	4	FALSE	Reactome	Cytokine Signaling in Immune system	1	2	0	0	0	2	1341
IL17A	ENSG00000112115	interleukin 17A	1322	3	FALSE	FALSE	FALSE	FALSE	TRUE	FALSE	FALSE	FALSE	FALSE	FALSE	TRUE	FALSE	Secreted	0	9	CHEMBL1743068	SECUKINUMAB	TRUE	4	FALSE	Reactome	Cytokine Signaling in Immune system	1	2	0	0	0	2	1341
IL17A	ENSG00000112115	interleukin 17A	1322	3	FALSE	FALSE	FALSE	FALSE	TRUE	FALSE	FALSE	FALSE	FALSE	FALSE	TRUE	FALSE	Secreted	0	9	CHEMBL1743034	IXEKIZUMAB	TRUE	4	FALSE	Reactome	Cytokine Signaling in Immune system	1	2	0	0	0	2	1341
IL17A	ENSG00000112115	interleukin 17A	1322	3	FALSE	FALSE	FALSE	FALSE	TRUE	FALSE	FALSE	FALSE	FALSE	FALSE	TRUE	FALSE	Secreted	0	9	CHEMBL1743068	SECUKINUMAB	TRUE	4	FALSE	Reactome	Cytokine Signaling in Immune system	1	2	0	0	0	2	1341
IL17A	ENSG00000112115	interleukin 17A	1322	3	FALSE	FALSE	FALSE	FALSE	TRUE	FALSE	FALSE	FALSE	FALSE	FALSE	TRUE	FALSE	Secreted	0	9	CHEMBL1743034	IXEKIZUMAB	TRUE	4	FALSE	Reactome	Cytokine Signaling in Immune system	1	2	0	0	0	2	1341
IL17A	ENSG00000112115	interleukin 17A	1322	3	FALSE	FALSE	FALSE	FALSE	TRUE	FALSE	FALSE	FALSE	FALSE	FALSE	TRUE	FALSE	Secreted	0	9	CHEMBL1743034	IXEKIZUMAB	TRUE	4	FALSE	Reactome	Cytokine Signaling in Immune system	1	2	0	0	0	2	1341
IL17A	ENSG00000112115	interleukin 17A	1322	3	FALSE	FALSE	FALSE	FALSE	TRUE	FALSE	FALSE	FALSE	FALSE	FALSE	TRUE	FALSE	Secreted	0	9	CHEMBL1743068	SECUKINUMAB	TRUE	4	FALSE	Reactome	Cytokine Signaling in Immune system	1	2	0	0	0	2	1341
IL17A	ENSG00000112115	interleukin 17A	1322	3	FALSE	FALSE	FALSE	FALSE	TRUE	FALSE	FALSE	FALSE	FALSE	FALSE	TRUE	FALSE	Secreted	0	9	CHEMBL1743068	SECUKINUMAB	TRUE	4	FALSE	Reactome	Cytokine Signaling in Immune system	1	2	0	0	0	2	1341
IL17A	ENSG00000112115	interleukin 17A	1322	3	FALSE	FALSE	FALSE	FALSE	TRUE	FALSE	FALSE	FALSE	FALSE	FALSE	TRUE	FALSE	Secreted	0	9	CHEMBL1743068	SECUKINUMAB	TRUE	4	FALSE	Reactome	Cytokine Signaling in Immune system	1	2	0	0	0	2	1341
IL17A	ENSG00000112115	interleukin 17A	1322	3	FALSE	FALSE	FALSE	FALSE	TRUE	FALSE	FALSE	FALSE	FALSE	FALSE	TRUE	FALSE	Secreted	0	9	CHEMBL1743068	SECUKINUMAB	TRUE	4	FALSE	Reactome	Cytokine Signaling in Immune system	1	2	0	0	0	2	1341
IL17A	ENSG00000112115	interleukin 17A	1322	3	FALSE	FALSE	FALSE	FALSE	TRUE	FALSE	FALSE	FALSE	FALSE	FALSE	TRUE	FALSE	Secreted	0	9	CHEMBL1743068	SECUKINUMAB	TRUE	4	FALSE	Reactome	Cytokine Signaling in Immune system	1	2	0	0	0	2	1341
IL17A	ENSG00000112115	interleukin 17A	1322	3	FALSE	FALSE	FALSE	FALSE	TRUE	FALSE	FALSE	FALSE	FALSE	FALSE	TRUE	FALSE	Secreted	0	9	CHEMBL1743068	SECUKINUMAB	TRUE	4	FALSE	Reactome	Cytokine Signaling in Immune system	1	2	0	0	0	2	1341
IL17A	ENSG00000112115	interleukin 17A	1322	3	FALSE	FALSE	FALSE	FALSE	TRUE	FALSE	FALSE	FALSE	FALSE	FALSE	TRUE	FALSE	Secreted	0	9	CHEMBL1743034	IXEKIZUMAB	TRUE	4	FALSE	Reactome	Cytokine Signaling in Immune system	1	2	0	0	0	2	1341
IL17A	ENSG00000112115	interleukin 17A	1322	3	FALSE	FALSE	FALSE	FALSE	TRUE	FALSE	FALSE	FALSE	FALSE	FALSE	TRUE	FALSE	Secreted	0	9	CHEMBL1743034	IXEKIZUMAB	TRUE	4	FALSE	Reactome	Cytokine Signaling in Immune system	1	2	0	0	0	2	1341
IL17A	ENSG00000112115	interleukin 17A	1322	3	FALSE	FALSE	FALSE	FALSE	TRUE	FALSE	FALSE	FALSE	FALSE	FALSE	TRUE	FALSE	Secreted	0	9	CHEMBL1743034	IXEKIZUMAB	TRUE	4	FALSE	Reactome	Cytokine Signaling in Immune system	1	2	0	0	0	2	1341
MMP2	ENSG00000087245	matrix metallopeptidase 2	1330	6	FALSE	TRUE	FALSE	TRUE	FALSE	FALSE	FALSE	FALSE	FALSE	FALSE	FALSE	FALSE	[Isoform 1]: Secreted	1	1	CHEMBL279785	MARIMASTAT	FALSE	3	FALSE	Reactome	Cytokine Signaling in Immune system	1	0	1	0	0	0	1337.5
MMP2	ENSG00000087245	matrix metallopeptidase 2	1330	6	FALSE	TRUE	FALSE	TRUE	FALSE	FALSE	FALSE	FALSE	FALSE	FALSE	FALSE	FALSE	[Isoform 1]: Secreted	1	1	CHEMBL279785	MARIMASTAT	FALSE	3	FALSE	Reactome	Cytokine Signaling in Immune system	1	0	1	0	0	0	1337.5
IL4	ENSG00000113520	interleukin 4	1316	1	FALSE	FALSE	FALSE	FALSE	FALSE	TRUE	FALSE	FALSE	FALSE	FALSE	FALSE	FALSE	Secreted	0	2	CHEMBL2108119	PASCOLIZUMAB	FALSE	2	FALSE	Reactome	Cytokine Signaling in Immune system	1	0	0	2	0	0	1322
IL4	ENSG00000113520	interleukin 4	1316	1	FALSE	FALSE	FALSE	FALSE	FALSE	TRUE	FALSE	FALSE	FALSE	FALSE	FALSE	FALSE	Secreted	0	2	CHEMBL4298097	ROMILKIMAB	FALSE	2	FALSE	Reactome	Cytokine Signaling in Immune system	1	0	0	2	0	0	1322
IL4	ENSG00000113520	interleukin 4	1316	1	FALSE	FALSE	FALSE	FALSE	FALSE	TRUE	FALSE	FALSE	FALSE	FALSE	FALSE	FALSE	Secreted	0	2	CHEMBL4298097	ROMILKIMAB	FALSE	2	FALSE	Reactome	Cytokine Signaling in Immune system	1	0	0	2	0	0	1322
IL4	ENSG00000113520	interleukin 4	1316	1	FALSE	FALSE	FALSE	FALSE	FALSE	TRUE	FALSE	FALSE	FALSE	FALSE	FALSE	FALSE	Secreted	0	2	CHEMBL2108119	PASCOLIZUMAB	FALSE	2	FALSE	Reactome	Cytokine Signaling in Immune system	1	0	0	2	0	0	1322
IL4	ENSG00000113520	interleukin 4	1316	1	FALSE	FALSE	FALSE	FALSE	FALSE	TRUE	FALSE	FALSE	FALSE	FALSE	FALSE	FALSE	Secreted	0	2	CHEMBL4298097	ROMILKIMAB	FALSE	2	FALSE	Reactome	Cytokine Signaling in Immune system	1	0	0	2	0	0	1322
CCL2	ENSG00000108691	C-C motif chemokine ligand 2	1303	3	FALSE	FALSE	FALSE	FALSE	FALSE	TRUE	FALSE	FALSE	FALSE	FALSE	FALSE	FALSE	Secreted	1	1	CHEMBL1742999	CARLUMAB	FALSE	2	FALSE	Reactome	Cytokine Signaling in Immune system	1	0	0	1	0	0	1307
CCL2	ENSG00000108691	C-C motif chemokine ligand 2	1303	3	FALSE	FALSE	FALSE	FALSE	FALSE	TRUE	FALSE	FALSE	FALSE	FALSE	FALSE	FALSE	Secreted	1	1	CHEMBL1742999	CARLUMAB	FALSE	2	FALSE	Reactome	Cytokine Signaling in Immune system	1	0	0	1	0	0	1307
CCL2	ENSG00000108691	C-C motif chemokine ligand 2	1303	3	FALSE	FALSE	FALSE	FALSE	FALSE	TRUE	FALSE	FALSE	FALSE	FALSE	FALSE	FALSE	Secreted	1	1	CHEMBL1742999	CARLUMAB	FALSE	2	FALSE	Reactome	Cytokine Signaling in Immune system	1	0	0	1	0	0	1307
ERBB2	ENSG00000141736	erb-b2 receptor tyrosine kinase 2	1164	7	TRUE	FALSE	FALSE	TRUE	TRUE	FALSE	FALSE	FALSE	FALSE	FALSE	TRUE	FALSE	[Isoform 1]: Cell membrane	1	42	CHEMBL554	LAPATINIB	TRUE	4	FALSE	KEGG	HIF-1 signaling pathway	1	12	1	0	0	12	1249.5
ERBB2	ENSG00000141736	erb-b2 receptor tyrosine kinase 2	1164	7	TRUE	FALSE	FALSE	TRUE	TRUE	FALSE	FALSE	FALSE	FALSE	FALSE	TRUE	FALSE	[Isoform 1]: Cell membrane	1	42	CHEMBL3989868	TUCATINIB	TRUE	4	FALSE	KEGG	HIF-1 signaling pathway	1	12	1	0	0	12	1249.5
ERBB2	ENSG00000141736	erb-b2 receptor tyrosine kinase 2	1164	7	TRUE	FALSE	FALSE	TRUE	TRUE	FALSE	FALSE	FALSE	FALSE	FALSE	TRUE	FALSE	[Isoform 1]: Cell membrane	1	42	CHEMBL1743082	TRASTUZUMAB EMTANSINE	TRUE	4	FALSE	KEGG	HIF-1 signaling pathway	1	12	1	0	0	12	1249.5
ERBB2	ENSG00000141736	erb-b2 receptor tyrosine kinase 2	1164	7	TRUE	FALSE	FALSE	TRUE	TRUE	FALSE	FALSE	FALSE	FALSE	FALSE	TRUE	FALSE	[Isoform 1]: Cell membrane	1	42	CHEMBL3544956	PYROTINIB	FALSE	3	FALSE	KEGG	HIF-1 signaling pathway	1	12	1	0	0	12	1249.5
ERBB2	ENSG00000141736	erb-b2 receptor tyrosine kinase 2	1164	7	TRUE	FALSE	FALSE	TRUE	TRUE	FALSE	FALSE	FALSE	FALSE	FALSE	TRUE	FALSE	[Isoform 1]: Cell membrane	1	42	CHEMBL2105719	DACOMITINIB	TRUE	4	FALSE	KEGG	HIF-1 signaling pathway	1	12	1	0	0	12	1249.5
ERBB2	ENSG00000141736	erb-b2 receptor tyrosine kinase 2	1164	7	TRUE	FALSE	FALSE	TRUE	TRUE	FALSE	FALSE	FALSE	FALSE	FALSE	TRUE	FALSE	[Isoform 1]: Cell membrane	1	42	CHEMBL180022	NERATINIB	TRUE	4	FALSE	KEGG	HIF-1 signaling pathway	1	12	1	0	0	12	1249.5
ERBB2	ENSG00000141736	erb-b2 receptor tyrosine kinase 2	1164	7	TRUE	FALSE	FALSE	TRUE	TRUE	FALSE	FALSE	FALSE	FALSE	FALSE	TRUE	FALSE	[Isoform 1]: Cell membrane	1	42	CHEMBL24828	VANDETANIB	TRUE	4	FALSE	KEGG	HIF-1 signaling pathway	1	12	1	0	0	12	1249.5
ERBB2	ENSG00000141736	erb-b2 receptor tyrosine kinase 2	1164	7	TRUE	FALSE	FALSE	TRUE	TRUE	FALSE	FALSE	FALSE	FALSE	FALSE	TRUE	FALSE	[Isoform 1]: Cell membrane	1	42	CHEMBL180022	NERATINIB	TRUE	4	FALSE	KEGG	HIF-1 signaling pathway	1	12	1	0	0	12	1249.5
ERBB2	ENSG00000141736	erb-b2 receptor tyrosine kinase 2	1164	7	TRUE	FALSE	FALSE	TRUE	TRUE	FALSE	FALSE	FALSE	FALSE	FALSE	TRUE	FALSE	[Isoform 1]: Cell membrane	1	42	CHEMBL1201585	TRASTUZUMAB	TRUE	4	FALSE	KEGG	HIF-1 signaling pathway	1	12	1	0	0	12	1249.5
ERBB2	ENSG00000141736	erb-b2 receptor tyrosine kinase 2	1164	7	TRUE	FALSE	FALSE	TRUE	TRUE	FALSE	FALSE	FALSE	FALSE	FALSE	TRUE	FALSE	[Isoform 1]: Cell membrane	1	42	CHEMBL1201585	TRASTUZUMAB	TRUE	4	FALSE	KEGG	HIF-1 signaling pathway	1	12	1	0	0	12	1249.5
ERBB2	ENSG00000141736	erb-b2 receptor tyrosine kinase 2	1164	7	TRUE	FALSE	FALSE	TRUE	TRUE	FALSE	FALSE	FALSE	FALSE	FALSE	TRUE	FALSE	[Isoform 1]: Cell membrane	1	42	CHEMBL1173655	AFATINIB	TRUE	4	FALSE	KEGG	HIF-1 signaling pathway	1	12	1	0	0	12	1249.5
ERBB2	ENSG00000141736	erb-b2 receptor tyrosine kinase 2	1164	7	TRUE	FALSE	FALSE	TRUE	TRUE	FALSE	FALSE	FALSE	FALSE	FALSE	TRUE	FALSE	[Isoform 1]: Cell membrane	1	42	CHEMBL2110732	DACOMITINIB	TRUE	4	FALSE	KEGG	HIF-1 signaling pathway	1	12	1	0	0	12	1249.5
ERBB2	ENSG00000141736	erb-b2 receptor tyrosine kinase 2	1164	7	TRUE	FALSE	FALSE	TRUE	TRUE	FALSE	FALSE	FALSE	FALSE	FALSE	TRUE	FALSE	[Isoform 1]: Cell membrane	1	42	CHEMBL1201179	LAPATINIB DITOSYLATE	TRUE	4	FALSE	KEGG	HIF-1 signaling pathway	1	12	1	0	0	12	1249.5
ERBB2	ENSG00000141736	erb-b2 receptor tyrosine kinase 2	1164	7	TRUE	FALSE	FALSE	TRUE	TRUE	FALSE	FALSE	FALSE	FALSE	FALSE	TRUE	FALSE	[Isoform 1]: Cell membrane	1	42	CHEMBL24828	VANDETANIB	TRUE	4	FALSE	KEGG	HIF-1 signaling pathway	1	12	1	0	0	12	1249.5
ERBB2	ENSG00000141736	erb-b2 receptor tyrosine kinase 2	1164	7	TRUE	FALSE	FALSE	TRUE	TRUE	FALSE	FALSE	FALSE	FALSE	FALSE	TRUE	FALSE	[Isoform 1]: Cell membrane	1	42	CHEMBL1743082	TRASTUZUMAB EMTANSINE	TRUE	4	FALSE	KEGG	HIF-1 signaling pathway	1	12	1	0	0	12	1249.5
ERBB2	ENSG00000141736	erb-b2 receptor tyrosine kinase 2	1164	7	TRUE	FALSE	FALSE	TRUE	TRUE	FALSE	FALSE	FALSE	FALSE	FALSE	TRUE	FALSE	[Isoform 1]: Cell membrane	1	42	CHEMBL3989921	NERATINIB MALEATE	TRUE	4	FALSE	KEGG	HIF-1 signaling pathway	1	12	1	0	0	12	1249.5
ERBB2	ENSG00000141736	erb-b2 receptor tyrosine kinase 2	1164	7	TRUE	FALSE	FALSE	TRUE	TRUE	FALSE	FALSE	FALSE	FALSE	FALSE	TRUE	FALSE	[Isoform 1]: Cell membrane	1	42	CHEMBL1173655	AFATINIB	TRUE	4	FALSE	KEGG	HIF-1 signaling pathway	1	12	1	0	0	12	1249.5
ERBB2	ENSG00000141736	erb-b2 receptor tyrosine kinase 2	1164	7	TRUE	FALSE	FALSE	TRUE	TRUE	FALSE	FALSE	FALSE	FALSE	FALSE	TRUE	FALSE	[Isoform 1]: Cell membrane	1	42	CHEMBL1201585	TRASTUZUMAB	TRUE	4	FALSE	KEGG	HIF-1 signaling pathway	1	12	1	0	0	12	1249.5
ERBB2	ENSG00000141736	erb-b2 receptor tyrosine kinase 2	1164	7	TRUE	FALSE	FALSE	TRUE	TRUE	FALSE	FALSE	FALSE	FALSE	FALSE	TRUE	FALSE	[Isoform 1]: Cell membrane	1	42	CHEMBL554	LAPATINIB	TRUE	4	FALSE	KEGG	HIF-1 signaling pathway	1	12	1	0	0	12	1249.5
ERBB2	ENSG00000141736	erb-b2 receptor tyrosine kinase 2	1164	7	TRUE	FALSE	FALSE	TRUE	TRUE	FALSE	FALSE	FALSE	FALSE	FALSE	TRUE	FALSE	[Isoform 1]: Cell membrane	1	42	CHEMBL4297844	TRASTUZUMAB DERUXTECAN	TRUE	4	FALSE	KEGG	HIF-1 signaling pathway	1	12	1	0	0	12	1249.5
ERBB2	ENSG00000141736	erb-b2 receptor tyrosine kinase 2	1164	7	TRUE	FALSE	FALSE	TRUE	TRUE	FALSE	FALSE	FALSE	FALSE	FALSE	TRUE	FALSE	[Isoform 1]: Cell membrane	1	42	CHEMBL1173655	AFATINIB	TRUE	4	FALSE	KEGG	HIF-1 signaling pathway	1	12	1	0	0	12	1249.5
ERBB2	ENSG00000141736	erb-b2 receptor tyrosine kinase 2	1164	7	TRUE	FALSE	FALSE	TRUE	TRUE	FALSE	FALSE	FALSE	FALSE	FALSE	TRUE	FALSE	[Isoform 1]: Cell membrane	1	42	CHEMBL1201179	LAPATINIB DITOSYLATE	TRUE	4	FALSE	KEGG	HIF-1 signaling pathway	1	12	1	0	0	12	1249.5
ERBB2	ENSG00000141736	erb-b2 receptor tyrosine kinase 2	1164	7	TRUE	FALSE	FALSE	TRUE	TRUE	FALSE	FALSE	FALSE	FALSE	FALSE	TRUE	FALSE	[Isoform 1]: Cell membrane	1	42	CHEMBL2110732	DACOMITINIB	TRUE	4	FALSE	KEGG	HIF-1 signaling pathway	1	12	1	0	0	12	1249.5
ERBB2	ENSG00000141736	erb-b2 receptor tyrosine kinase 2	1164	7	TRUE	FALSE	FALSE	TRUE	TRUE	FALSE	FALSE	FALSE	FALSE	FALSE	TRUE	FALSE	[Isoform 1]: Cell membrane	1	42	CHEMBL554	LAPATINIB	TRUE	4	FALSE	KEGG	HIF-1 signaling pathway	1	12	1	0	0	12	1249.5
ERBB2	ENSG00000141736	erb-b2 receptor tyrosine kinase 2	1164	7	TRUE	FALSE	FALSE	TRUE	TRUE	FALSE	FALSE	FALSE	FALSE	FALSE	TRUE	FALSE	[Isoform 1]: Cell membrane	1	42	CHEMBL2007641	PERTUZUMAB	TRUE	4	FALSE	KEGG	HIF-1 signaling pathway	1	12	1	0	0	12	1249.5
NR3C1	ENSG00000113580	nuclear receptor subfamily 3 group C member 1	1185	5	TRUE	FALSE	FALSE	TRUE	FALSE	FALSE	FALSE	FALSE	FALSE	FALSE	FALSE	FALSE	[Isoform Alpha]: Cytoplasm	33	71	CHEMBL131	PREDNISOLONE	TRUE	4	FALSE	Reactome	SUMOylation	2	15	0	0	0	15	1242
NR3C1	ENSG00000113580	nuclear receptor subfamily 3 group C member 1	1185	5	TRUE	FALSE	FALSE	TRUE	FALSE	FALSE	FALSE	FALSE	FALSE	FALSE	FALSE	FALSE	[Isoform Alpha]: Cytoplasm	33	71	CHEMBL635	PREDNISONE	TRUE	4	FALSE	Reactome	SUMO E3 ligases SUMOylate target proteins	2	15	0	0	0	15	1242
NR3C1	ENSG00000113580	nuclear receptor subfamily 3 group C member 1	1185	5	TRUE	FALSE	FALSE	TRUE	FALSE	FALSE	FALSE	FALSE	FALSE	FALSE	FALSE	FALSE	[Isoform Alpha]: Cytoplasm	33	71	CHEMBL650	METHYLPREDNISOLONE	TRUE	4	FALSE	Reactome	SUMO E3 ligases SUMOylate target proteins	2	15	0	0	0	15	1242
NR3C1	ENSG00000113580	nuclear receptor subfamily 3 group C member 1	1185	5	TRUE	FALSE	FALSE	TRUE	FALSE	FALSE	FALSE	FALSE	FALSE	FALSE	FALSE	FALSE	[Isoform Alpha]: Cytoplasm	33	71	CHEMBL384467	DEXAMETHASONE	TRUE	4	FALSE	Reactome	SUMO E3 ligases SUMOylate target proteins	2	15	0	0	0	15	1242
NR3C1	ENSG00000113580	nuclear receptor subfamily 3 group C member 1	1185	5	TRUE	FALSE	FALSE	TRUE	FALSE	FALSE	FALSE	FALSE	FALSE	FALSE	FALSE	FALSE	[Isoform Alpha]: Cytoplasm	33	71	CHEMBL1504	TRIAMCINOLONE ACETONIDE	TRUE	4	FALSE	Reactome	SUMOylation	2	15	0	0	0	15	1242
NR3C1	ENSG00000113580	nuclear receptor subfamily 3 group C member 1	1185	5	TRUE	FALSE	FALSE	TRUE	FALSE	FALSE	FALSE	FALSE	FALSE	FALSE	FALSE	FALSE	[Isoform Alpha]: Cytoplasm	33	71	CHEMBL1152	PREDNISOLONE ACETATE	TRUE	4	FALSE	Reactome	SUMOylation	2	15	0	0	0	15	1242
NR3C1	ENSG00000113580	nuclear receptor subfamily 3 group C member 1	1185	5	TRUE	FALSE	FALSE	TRUE	FALSE	FALSE	FALSE	FALSE	FALSE	FALSE	FALSE	FALSE	[Isoform Alpha]: Cytoplasm	33	71	CHEMBL1201231	PREDNISOLONE PHOSPHORIC ACID	TRUE	4	FALSE	Reactome	SUMO E3 ligases SUMOylate target proteins	2	15	0	0	0	15	1242
NR3C1	ENSG00000113580	nuclear receptor subfamily 3 group C member 1	1185	5	TRUE	FALSE	FALSE	TRUE	FALSE	FALSE	FALSE	FALSE	FALSE	FALSE	FALSE	FALSE	[Isoform Alpha]: Cytoplasm	33	71	CHEMBL131	PREDNISOLONE	TRUE	4	FALSE	Reactome	SUMO E3 ligases SUMOylate target proteins	2	15	0	0	0	15	1242
NR3C1	ENSG00000113580	nuclear receptor subfamily 3 group C member 1	1185	5	TRUE	FALSE	FALSE	TRUE	FALSE	FALSE	FALSE	FALSE	FALSE	FALSE	FALSE	FALSE	[Isoform Alpha]: Cytoplasm	33	71	CHEMBL1161	MOMETASONE FUROATE	TRUE	4	FALSE	Reactome	SUMO E3 ligases SUMOylate target proteins	2	15	0	0	0	15	1242
NR3C1	ENSG00000113580	nuclear receptor subfamily 3 group C member 1	1185	5	TRUE	FALSE	FALSE	TRUE	FALSE	FALSE	FALSE	FALSE	FALSE	FALSE	FALSE	FALSE	[Isoform Alpha]: Cytoplasm	33	71	CHEMBL1201265	METHYLPREDNISOLONE HEMISUCCINATE	TRUE	4	FALSE	Reactome	SUMO E3 ligases SUMOylate target proteins	2	15	0	0	0	15	1242
NR3C1	ENSG00000113580	nuclear receptor subfamily 3 group C member 1	1185	5	TRUE	FALSE	FALSE	TRUE	FALSE	FALSE	FALSE	FALSE	FALSE	FALSE	FALSE	FALSE	[Isoform Alpha]: Cytoplasm	33	71	CHEMBL131	PREDNISOLONE	TRUE	4	FALSE	Reactome	SUMO E3 ligases SUMOylate target proteins	2	15	0	0	0	15	1242
NR3C1	ENSG00000113580	nuclear receptor subfamily 3 group C member 1	1185	5	TRUE	FALSE	FALSE	TRUE	FALSE	FALSE	FALSE	FALSE	FALSE	FALSE	FALSE	FALSE	[Isoform Alpha]: Cytoplasm	33	71	CHEMBL384467	DEXAMETHASONE	TRUE	4	FALSE	Reactome	SUMOylation	2	15	0	0	0	15	1242
NR3C1	ENSG00000113580	nuclear receptor subfamily 3 group C member 1	1185	5	TRUE	FALSE	FALSE	TRUE	FALSE	FALSE	FALSE	FALSE	FALSE	FALSE	FALSE	FALSE	[Isoform Alpha]: Cytoplasm	33	71	CHEMBL635	PREDNISONE	TRUE	4	FALSE	Reactome	SUMO E3 ligases SUMOylate target proteins	2	15	0	0	0	15	1242
NR3C1	ENSG00000113580	nuclear receptor subfamily 3 group C member 1	1185	5	TRUE	FALSE	FALSE	TRUE	FALSE	FALSE	FALSE	FALSE	FALSE	FALSE	FALSE	FALSE	[Isoform Alpha]: Cytoplasm	33	71	CHEMBL635	PREDNISONE	TRUE	4	FALSE	Reactome	SUMO E3 ligases SUMOylate target proteins	2	15	0	0	0	15	1242
NR3C1	ENSG00000113580	nuclear receptor subfamily 3 group C member 1	1185	5	TRUE	FALSE	FALSE	TRUE	FALSE	FALSE	FALSE	FALSE	FALSE	FALSE	FALSE	FALSE	[Isoform Alpha]: Cytoplasm	33	71	CHEMBL1161	MOMETASONE FUROATE	TRUE	4	FALSE	Reactome	SUMOylation	2	15	0	0	0	15	1242
NR3C1	ENSG00000113580	nuclear receptor subfamily 3 group C member 1	1185	5	TRUE	FALSE	FALSE	TRUE	FALSE	FALSE	FALSE	FALSE	FALSE	FALSE	FALSE	FALSE	[Isoform Alpha]: Cytoplasm	33	71	CHEMBL384467	DEXAMETHASONE	TRUE	4	FALSE	Reactome	SUMOylation	2	15	0	0	0	15	1242
NR3C1	ENSG00000113580	nuclear receptor subfamily 3 group C member 1	1185	5	TRUE	FALSE	FALSE	TRUE	FALSE	FALSE	FALSE	FALSE	FALSE	FALSE	FALSE	FALSE	[Isoform Alpha]: Cytoplasm	33	71	CHEMBL1504	TRIAMCINOLONE ACETONIDE	TRUE	4	FALSE	Reactome	SUMOylation	2	15	0	0	0	15	1242
NR3C1	ENSG00000113580	nuclear receptor subfamily 3 group C member 1	1185	5	TRUE	FALSE	FALSE	TRUE	FALSE	FALSE	FALSE	FALSE	FALSE	FALSE	FALSE	FALSE	[Isoform Alpha]: Cytoplasm	33	71	CHEMBL1364144	METHYLPREDNISOLONE ACETATE	TRUE	4	FALSE	Reactome	SUMOylation	2	15	0	0	0	15	1242
NR3C1	ENSG00000113580	nuclear receptor subfamily 3 group C member 1	1185	5	TRUE	FALSE	FALSE	TRUE	FALSE	FALSE	FALSE	FALSE	FALSE	FALSE	FALSE	FALSE	[Isoform Alpha]: Cytoplasm	33	71	CHEMBL1152	PREDNISOLONE ACETATE	TRUE	4	FALSE	Reactome	SUMO E3 ligases SUMOylate target proteins	2	15	0	0	0	15	1242
NR3C1	ENSG00000113580	nuclear receptor subfamily 3 group C member 1	1185	5	TRUE	FALSE	FALSE	TRUE	FALSE	FALSE	FALSE	FALSE	FALSE	FALSE	FALSE	FALSE	[Isoform Alpha]: Cytoplasm	33	71	CHEMBL1200538	BETAMETHASONE ACETATE	TRUE	4	FALSE	Reactome	SUMOylation	2	15	0	0	0	15	1242
NR3C1	ENSG00000113580	nuclear receptor subfamily 3 group C member 1	1185	5	TRUE	FALSE	FALSE	TRUE	FALSE	FALSE	FALSE	FALSE	FALSE	FALSE	FALSE	FALSE	[Isoform Alpha]: Cytoplasm	33	71	CHEMBL1473	FLUTICASONE PROPIONATE	TRUE	4	FALSE	Reactome	SUMOylation	2	15	0	0	0	15	1242
NR3C1	ENSG00000113580	nuclear receptor subfamily 3 group C member 1	1185	5	TRUE	FALSE	FALSE	TRUE	FALSE	FALSE	FALSE	FALSE	FALSE	FALSE	FALSE	FALSE	[Isoform Alpha]: Cytoplasm	33	71	CHEMBL1201265	METHYLPREDNISOLONE HEMISUCCINATE	TRUE	4	FALSE	Reactome	SUMOylation	2	15	0	0	0	15	1242
NR3C1	ENSG00000113580	nuclear receptor subfamily 3 group C member 1	1185	5	TRUE	FALSE	FALSE	TRUE	FALSE	FALSE	FALSE	FALSE	FALSE	FALSE	FALSE	FALSE	[Isoform Alpha]: Cytoplasm	33	71	CHEMBL1200538	BETAMETHASONE ACETATE	TRUE	4	FALSE	Reactome	SUMO E3 ligases SUMOylate target proteins	2	15	0	0	0	15	1242
NR3C1	ENSG00000113580	nuclear receptor subfamily 3 group C member 1	1185	5	TRUE	FALSE	FALSE	TRUE	FALSE	FALSE	FALSE	FALSE	FALSE	FALSE	FALSE	FALSE	[Isoform Alpha]: Cytoplasm	33	71	CHEMBL1370	BUDESONIDE	TRUE	4	FALSE	Reactome	SUMOylation	2	15	0	0	0	15	1242
NR3C1	ENSG00000113580	nuclear receptor subfamily 3 group C member 1	1185	5	TRUE	FALSE	FALSE	TRUE	FALSE	FALSE	FALSE	FALSE	FALSE	FALSE	FALSE	FALSE	[Isoform Alpha]: Cytoplasm	33	71	CHEMBL635	PREDNISONE	TRUE	4	FALSE	Reactome	SUMOylation	2	15	0	0	0	15	1242
NR3C1	ENSG00000113580	nuclear receptor subfamily 3 group C member 1	1185	5	TRUE	FALSE	FALSE	TRUE	FALSE	FALSE	FALSE	FALSE	FALSE	FALSE	FALSE	FALSE	[Isoform Alpha]: Cytoplasm	33	71	CHEMBL650	METHYLPREDNISOLONE	TRUE	4	FALSE	Reactome	SUMOylation	2	15	0	0	0	15	1242
NR3C1	ENSG00000113580	nuclear receptor subfamily 3 group C member 1	1185	5	TRUE	FALSE	FALSE	TRUE	FALSE	FALSE	FALSE	FALSE	FALSE	FALSE	FALSE	FALSE	[Isoform Alpha]: Cytoplasm	33	71	CHEMBL1201302	DEXAMETHASONE PHOSPHORIC ACID	TRUE	4	FALSE	Reactome	SUMOylation	2	15	0	0	0	15	1242
NR3C1	ENSG00000113580	nuclear receptor subfamily 3 group C member 1	1185	5	TRUE	FALSE	FALSE	TRUE	FALSE	FALSE	FALSE	FALSE	FALSE	FALSE	FALSE	FALSE	[Isoform Alpha]: Cytoplasm	33	71	CHEMBL635	PREDNISONE	TRUE	4	FALSE	Reactome	SUMOylation	2	15	0	0	0	15	1242
NR3C1	ENSG00000113580	nuclear receptor subfamily 3 group C member 1	1185	5	TRUE	FALSE	FALSE	TRUE	FALSE	FALSE	FALSE	FALSE	FALSE	FALSE	FALSE	FALSE	[Isoform Alpha]: Cytoplasm	33	71	CHEMBL1504	TRIAMCINOLONE ACETONIDE	TRUE	4	FALSE	Reactome	SUMO E3 ligases SUMOylate target proteins	2	15	0	0	0	15	1242
NR3C1	ENSG00000113580	nuclear receptor subfamily 3 group C member 1	1185	5	TRUE	FALSE	FALSE	TRUE	FALSE	FALSE	FALSE	FALSE	FALSE	FALSE	FALSE	FALSE	[Isoform Alpha]: Cytoplasm	33	71	CHEMBL384467	DEXAMETHASONE	TRUE	4	FALSE	Reactome	SUMOylation	2	15	0	0	0	15	1242
NR3C1	ENSG00000113580	nuclear receptor subfamily 3 group C member 1	1185	5	TRUE	FALSE	FALSE	TRUE	FALSE	FALSE	FALSE	FALSE	FALSE	FALSE	FALSE	FALSE	[Isoform Alpha]: Cytoplasm	33	71	CHEMBL635	PREDNISONE	TRUE	4	FALSE	Reactome	SUMOylation	2	15	0	0	0	15	1242
NR3C1	ENSG00000113580	nuclear receptor subfamily 3 group C member 1	1185	5	TRUE	FALSE	FALSE	TRUE	FALSE	FALSE	FALSE	FALSE	FALSE	FALSE	FALSE	FALSE	[Isoform Alpha]: Cytoplasm	33	71	CHEMBL1364144	METHYLPREDNISOLONE ACETATE	TRUE	4	FALSE	Reactome	SUMO E3 ligases SUMOylate target proteins	2	15	0	0	0	15	1242
NR3C1	ENSG00000113580	nuclear receptor subfamily 3 group C member 1	1185	5	TRUE	FALSE	FALSE	TRUE	FALSE	FALSE	FALSE	FALSE	FALSE	FALSE	FALSE	FALSE	[Isoform Alpha]: Cytoplasm	33	71	CHEMBL635	PREDNISONE	TRUE	4	FALSE	Reactome	SUMO E3 ligases SUMOylate target proteins	2	15	0	0	0	15	1242
NR3C1	ENSG00000113580	nuclear receptor subfamily 3 group C member 1	1185	5	TRUE	FALSE	FALSE	TRUE	FALSE	FALSE	FALSE	FALSE	FALSE	FALSE	FALSE	FALSE	[Isoform Alpha]: Cytoplasm	33	71	CHEMBL1201231	PREDNISOLONE PHOSPHORIC ACID	TRUE	4	FALSE	Reactome	SUMOylation	2	15	0	0	0	15	1242
NR3C1	ENSG00000113580	nuclear receptor subfamily 3 group C member 1	1185	5	TRUE	FALSE	FALSE	TRUE	FALSE	FALSE	FALSE	FALSE	FALSE	FALSE	FALSE	FALSE	[Isoform Alpha]: Cytoplasm	33	71	CHEMBL1201302	DEXAMETHASONE PHOSPHORIC ACID	TRUE	4	FALSE	Reactome	SUMO E3 ligases SUMOylate target proteins	2	15	0	0	0	15	1242
NR3C1	ENSG00000113580	nuclear receptor subfamily 3 group C member 1	1185	5	TRUE	FALSE	FALSE	TRUE	FALSE	FALSE	FALSE	FALSE	FALSE	FALSE	FALSE	FALSE	[Isoform Alpha]: Cytoplasm	33	71	CHEMBL632	BETAMETHASONE	TRUE	4	FALSE	Reactome	SUMO E3 ligases SUMOylate target proteins	2	15	0	0	0	15	1242
NR3C1	ENSG00000113580	nuclear receptor subfamily 3 group C member 1	1185	5	TRUE	FALSE	FALSE	TRUE	FALSE	FALSE	FALSE	FALSE	FALSE	FALSE	FALSE	FALSE	[Isoform Alpha]: Cytoplasm	33	71	CHEMBL1473	FLUTICASONE PROPIONATE	TRUE	4	FALSE	Reactome	SUMO E3 ligases SUMOylate target proteins	2	15	0	0	0	15	1242
NR3C1	ENSG00000113580	nuclear receptor subfamily 3 group C member 1	1185	5	TRUE	FALSE	FALSE	TRUE	FALSE	FALSE	FALSE	FALSE	FALSE	FALSE	FALSE	FALSE	[Isoform Alpha]: Cytoplasm	33	71	CHEMBL131	PREDNISOLONE	TRUE	4	FALSE	Reactome	SUMOylation	2	15	0	0	0	15	1242
NR3C1	ENSG00000113580	nuclear receptor subfamily 3 group C member 1	1185	5	TRUE	FALSE	FALSE	TRUE	FALSE	FALSE	FALSE	FALSE	FALSE	FALSE	FALSE	FALSE	[Isoform Alpha]: Cytoplasm	33	71	CHEMBL632	BETAMETHASONE	TRUE	4	FALSE	Reactome	SUMOylation	2	15	0	0	0	15	1242
NR3C1	ENSG00000113580	nuclear receptor subfamily 3 group C member 1	1185	5	TRUE	FALSE	FALSE	TRUE	FALSE	FALSE	FALSE	FALSE	FALSE	FALSE	FALSE	FALSE	[Isoform Alpha]: Cytoplasm	33	71	CHEMBL384467	DEXAMETHASONE	TRUE	4	FALSE	Reactome	SUMO E3 ligases SUMOylate target proteins	2	15	0	0	0	15	1242
NR3C1	ENSG00000113580	nuclear receptor subfamily 3 group C member 1	1185	5	TRUE	FALSE	FALSE	TRUE	FALSE	FALSE	FALSE	FALSE	FALSE	FALSE	FALSE	FALSE	[Isoform Alpha]: Cytoplasm	33	71	CHEMBL1504	TRIAMCINOLONE ACETONIDE	TRUE	4	FALSE	Reactome	SUMO E3 ligases SUMOylate target proteins	2	15	0	0	0	15	1242
NR3C1	ENSG00000113580	nuclear receptor subfamily 3 group C member 1	1185	5	TRUE	FALSE	FALSE	TRUE	FALSE	FALSE	FALSE	FALSE	FALSE	FALSE	FALSE	FALSE	[Isoform Alpha]: Cytoplasm	33	71	CHEMBL635	PREDNISONE	TRUE	4	FALSE	Reactome	SUMOylation	2	15	0	0	0	15	1242
NR3C1	ENSG00000113580	nuclear receptor subfamily 3 group C member 1	1185	5	TRUE	FALSE	FALSE	TRUE	FALSE	FALSE	FALSE	FALSE	FALSE	FALSE	FALSE	FALSE	[Isoform Alpha]: Cytoplasm	33	71	CHEMBL384467	DEXAMETHASONE	TRUE	4	FALSE	Reactome	SUMO E3 ligases SUMOylate target proteins	2	15	0	0	0	15	1242
NR3C1	ENSG00000113580	nuclear receptor subfamily 3 group C member 1	1185	5	TRUE	FALSE	FALSE	TRUE	FALSE	FALSE	FALSE	FALSE	FALSE	FALSE	FALSE	FALSE	[Isoform Alpha]: Cytoplasm	33	71	CHEMBL1152	PREDNISOLONE ACETATE	TRUE	4	FALSE	Reactome	SUMOylation	2	15	0	0	0	15	1242
NR3C1	ENSG00000113580	nuclear receptor subfamily 3 group C member 1	1185	5	TRUE	FALSE	FALSE	TRUE	FALSE	FALSE	FALSE	FALSE	FALSE	FALSE	FALSE	FALSE	[Isoform Alpha]: Cytoplasm	33	71	CHEMBL1370	BUDESONIDE	TRUE	4	FALSE	Reactome	SUMO E3 ligases SUMOylate target proteins	2	15	0	0	0	15	1242
NR3C1	ENSG00000113580	nuclear receptor subfamily 3 group C member 1	1185	5	TRUE	FALSE	FALSE	TRUE	FALSE	FALSE	FALSE	FALSE	FALSE	FALSE	FALSE	FALSE	[Isoform Alpha]: Cytoplasm	33	71	CHEMBL1152	PREDNISOLONE ACETATE	TRUE	4	FALSE	Reactome	SUMO E3 ligases SUMOylate target proteins	2	15	0	0	0	15	1242
NR3C1	ENSG00000113580	nuclear receptor subfamily 3 group C member 1	1185	5	TRUE	FALSE	FALSE	TRUE	FALSE	FALSE	FALSE	FALSE	FALSE	FALSE	FALSE	FALSE	[Isoform Alpha]: Cytoplasm	33	71	CHEMBL384467	DEXAMETHASONE	TRUE	4	FALSE	Reactome	SUMOylation	2	15	0	0	0	15	1242
NR3C1	ENSG00000113580	nuclear receptor subfamily 3 group C member 1	1185	5	TRUE	FALSE	FALSE	TRUE	FALSE	FALSE	FALSE	FALSE	FALSE	FALSE	FALSE	FALSE	[Isoform Alpha]: Cytoplasm	33	71	CHEMBL1201231	PREDNISOLONE PHOSPHORIC ACID	TRUE	4	FALSE	Reactome	SUMO E3 ligases SUMOylate target proteins	2	15	0	0	0	15	1242
NR3C1	ENSG00000113580	nuclear receptor subfamily 3 group C member 1	1185	5	TRUE	FALSE	FALSE	TRUE	FALSE	FALSE	FALSE	FALSE	FALSE	FALSE	FALSE	FALSE	[Isoform Alpha]: Cytoplasm	33	71	CHEMBL1201231	PREDNISOLONE PHOSPHORIC ACID	TRUE	4	FALSE	Reactome	SUMOylation	2	15	0	0	0	15	1242
NR3C1	ENSG00000113580	nuclear receptor subfamily 3 group C member 1	1185	5	TRUE	FALSE	FALSE	TRUE	FALSE	FALSE	FALSE	FALSE	FALSE	FALSE	FALSE	FALSE	[Isoform Alpha]: Cytoplasm	33	71	CHEMBL384467	DEXAMETHASONE	TRUE	4	FALSE	Reactome	SUMO E3 ligases SUMOylate target proteins	2	15	0	0	0	15	1242
PPARG	ENSG00000132170	peroxisome proliferator activated receptor gamma	1186	5	TRUE	FALSE	FALSE	TRUE	FALSE	FALSE	FALSE	FALSE	FALSE	FALSE	FALSE	FALSE	Nucleus	14	35	CHEMBL121	ROSIGLITAZONE	TRUE	4	TRUE	Reactome	SUMO E3 ligases SUMOylate target proteins	2	7	0	0	0	7	1221
PPARG	ENSG00000132170	peroxisome proliferator activated receptor gamma	1186	5	TRUE	FALSE	FALSE	TRUE	FALSE	FALSE	FALSE	FALSE	FALSE	FALSE	FALSE	FALSE	Nucleus	14	35	CHEMBL595	PIOGLITAZONE	TRUE	4	FALSE	Reactome	SUMOylation	2	7	0	0	0	7	1221
PPARG	ENSG00000132170	peroxisome proliferator activated receptor gamma	1186	5	TRUE	FALSE	FALSE	TRUE	FALSE	FALSE	FALSE	FALSE	FALSE	FALSE	FALSE	FALSE	Nucleus	14	35	CHEMBL1201346	BALSALAZIDE	TRUE	4	FALSE	Reactome	SUMO E3 ligases SUMOylate target proteins	2	7	0	0	0	7	1221
PPARG	ENSG00000132170	peroxisome proliferator activated receptor gamma	1186	5	TRUE	FALSE	FALSE	TRUE	FALSE	FALSE	FALSE	FALSE	FALSE	FALSE	FALSE	FALSE	Nucleus	14	35	CHEMBL121	ROSIGLITAZONE	TRUE	4	TRUE	Reactome	SUMO E3 ligases SUMOylate target proteins	2	7	0	0	0	7	1221
PPARG	ENSG00000132170	peroxisome proliferator activated receptor gamma	1186	5	TRUE	FALSE	FALSE	TRUE	FALSE	FALSE	FALSE	FALSE	FALSE	FALSE	FALSE	FALSE	Nucleus	14	35	CHEMBL595	PIOGLITAZONE	TRUE	4	FALSE	Reactome	SUMO E3 ligases SUMOylate target proteins	2	7	0	0	0	7	1221
PPARG	ENSG00000132170	peroxisome proliferator activated receptor gamma	1186	5	TRUE	FALSE	FALSE	TRUE	FALSE	FALSE	FALSE	FALSE	FALSE	FALSE	FALSE	FALSE	Nucleus	14	35	CHEMBL121	ROSIGLITAZONE	TRUE	4	TRUE	Reactome	SUMO E3 ligases SUMOylate target proteins	2	7	0	0	0	7	1221
PPARG	ENSG00000132170	peroxisome proliferator activated receptor gamma	1186	5	TRUE	FALSE	FALSE	TRUE	FALSE	FALSE	FALSE	FALSE	FALSE	FALSE	FALSE	FALSE	Nucleus	14	35	CHEMBL121	ROSIGLITAZONE	TRUE	4	TRUE	Reactome	SUMOylation	2	7	0	0	0	7	1221
PPARG	ENSG00000132170	peroxisome proliferator activated receptor gamma	1186	5	TRUE	FALSE	FALSE	TRUE	FALSE	FALSE	FALSE	FALSE	FALSE	FALSE	FALSE	FALSE	Nucleus	14	35	CHEMBL595	PIOGLITAZONE	TRUE	4	FALSE	Reactome	SUMO E3 ligases SUMOylate target proteins	2	7	0	0	0	7	1221
PPARG	ENSG00000132170	peroxisome proliferator activated receptor gamma	1186	5	TRUE	FALSE	FALSE	TRUE	FALSE	FALSE	FALSE	FALSE	FALSE	FALSE	FALSE	FALSE	Nucleus	14	35	CHEMBL1200760	BALSALAZIDE DISODIUM	TRUE	4	FALSE	Reactome	SUMO E3 ligases SUMOylate target proteins	2	7	0	0	0	7	1221
PPARG	ENSG00000132170	peroxisome proliferator activated receptor gamma	1186	5	TRUE	FALSE	FALSE	TRUE	FALSE	FALSE	FALSE	FALSE	FALSE	FALSE	FALSE	FALSE	Nucleus	14	35	CHEMBL595	PIOGLITAZONE	TRUE	4	FALSE	Reactome	SUMO E3 ligases SUMOylate target proteins	2	7	0	0	0	7	1221
PPARG	ENSG00000132170	peroxisome proliferator activated receptor gamma	1186	5	TRUE	FALSE	FALSE	TRUE	FALSE	FALSE	FALSE	FALSE	FALSE	FALSE	FALSE	FALSE	Nucleus	14	35	CHEMBL1201346	BALSALAZIDE	TRUE	4	FALSE	Reactome	SUMOylation	2	7	0	0	0	7	1221
PPARG	ENSG00000132170	peroxisome proliferator activated receptor gamma	1186	5	TRUE	FALSE	FALSE	TRUE	FALSE	FALSE	FALSE	FALSE	FALSE	FALSE	FALSE	FALSE	Nucleus	14	35	CHEMBL595	PIOGLITAZONE	TRUE	4	FALSE	Reactome	SUMOylation	2	7	0	0	0	7	1221
PPARG	ENSG00000132170	peroxisome proliferator activated receptor gamma	1186	5	TRUE	FALSE	FALSE	TRUE	FALSE	FALSE	FALSE	FALSE	FALSE	FALSE	FALSE	FALSE	Nucleus	14	35	CHEMBL121	ROSIGLITAZONE	TRUE	4	TRUE	Reactome	SUMO E3 ligases SUMOylate target proteins	2	7	0	0	0	7	1221
PPARG	ENSG00000132170	peroxisome proliferator activated receptor gamma	1186	5	TRUE	FALSE	FALSE	TRUE	FALSE	FALSE	FALSE	FALSE	FALSE	FALSE	FALSE	FALSE	Nucleus	14	35	CHEMBL704	MESALAMINE	TRUE	4	FALSE	Reactome	SUMOylation	2	7	0	0	0	7	1221
PPARG	ENSG00000132170	peroxisome proliferator activated receptor gamma	1186	5	TRUE	FALSE	FALSE	TRUE	FALSE	FALSE	FALSE	FALSE	FALSE	FALSE	FALSE	FALSE	Nucleus	14	35	CHEMBL1200760	BALSALAZIDE DISODIUM	TRUE	4	FALSE	Reactome	SUMOylation	2	7	0	0	0	7	1221
PPARG	ENSG00000132170	peroxisome proliferator activated receptor gamma	1186	5	TRUE	FALSE	FALSE	TRUE	FALSE	FALSE	FALSE	FALSE	FALSE	FALSE	FALSE	FALSE	Nucleus	14	35	CHEMBL704	MESALAMINE	TRUE	4	FALSE	Reactome	SUMO E3 ligases SUMOylate target proteins	2	7	0	0	0	7	1221
PPARG	ENSG00000132170	peroxisome proliferator activated receptor gamma	1186	5	TRUE	FALSE	FALSE	TRUE	FALSE	FALSE	FALSE	FALSE	FALSE	FALSE	FALSE	FALSE	Nucleus	14	35	CHEMBL425	OLSALAZINE	TRUE	4	FALSE	Reactome	SUMOylation	2	7	0	0	0	7	1221
PPARG	ENSG00000132170	peroxisome proliferator activated receptor gamma	1186	5	TRUE	FALSE	FALSE	TRUE	FALSE	FALSE	FALSE	FALSE	FALSE	FALSE	FALSE	FALSE	Nucleus	14	35	CHEMBL595	PIOGLITAZONE	TRUE	4	FALSE	Reactome	SUMO E3 ligases SUMOylate target proteins	2	7	0	0	0	7	1221
PPARG	ENSG00000132170	peroxisome proliferator activated receptor gamma	1186	5	TRUE	FALSE	FALSE	TRUE	FALSE	FALSE	FALSE	FALSE	FALSE	FALSE	FALSE	FALSE	Nucleus	14	35	CHEMBL595	PIOGLITAZONE	TRUE	4	FALSE	Reactome	SUMOylation	2	7	0	0	0	7	1221
PPARG	ENSG00000132170	peroxisome proliferator activated receptor gamma	1186	5	TRUE	FALSE	FALSE	TRUE	FALSE	FALSE	FALSE	FALSE	FALSE	FALSE	FALSE	FALSE	Nucleus	14	35	CHEMBL843	ROSIGLITAZONE MALEATE	TRUE	4	TRUE	Reactome	SUMOylation	2	7	0	0	0	7	1221
PPARG	ENSG00000132170	peroxisome proliferator activated receptor gamma	1186	5	TRUE	FALSE	FALSE	TRUE	FALSE	FALSE	FALSE	FALSE	FALSE	FALSE	FALSE	FALSE	Nucleus	14	35	CHEMBL595	PIOGLITAZONE	TRUE	4	FALSE	Reactome	SUMOylation	2	7	0	0	0	7	1221
PPARG	ENSG00000132170	peroxisome proliferator activated receptor gamma	1186	5	TRUE	FALSE	FALSE	TRUE	FALSE	FALSE	FALSE	FALSE	FALSE	FALSE	FALSE	FALSE	Nucleus	14	35	CHEMBL121	ROSIGLITAZONE	TRUE	4	TRUE	Reactome	SUMO E3 ligases SUMOylate target proteins	2	7	0	0	0	7	1221
PPARG	ENSG00000132170	peroxisome proliferator activated receptor gamma	1186	5	TRUE	FALSE	FALSE	TRUE	FALSE	FALSE	FALSE	FALSE	FALSE	FALSE	FALSE	FALSE	Nucleus	14	35	CHEMBL121	ROSIGLITAZONE	TRUE	4	TRUE	Reactome	SUMOylation	2	7	0	0	0	7	1221
PPARG	ENSG00000132170	peroxisome proliferator activated receptor gamma	1186	5	TRUE	FALSE	FALSE	TRUE	FALSE	FALSE	FALSE	FALSE	FALSE	FALSE	FALSE	FALSE	Nucleus	14	35	CHEMBL595	PIOGLITAZONE	TRUE	4	FALSE	Reactome	SUMO E3 ligases SUMOylate target proteins	2	7	0	0	0	7	1221
PPARG	ENSG00000132170	peroxisome proliferator activated receptor gamma	1186	5	TRUE	FALSE	FALSE	TRUE	FALSE	FALSE	FALSE	FALSE	FALSE	FALSE	FALSE	FALSE	Nucleus	14	35	CHEMBL121	ROSIGLITAZONE	TRUE	4	TRUE	Reactome	SUMOylation	2	7	0	0	0	7	1221
PPARG	ENSG00000132170	peroxisome proliferator activated receptor gamma	1186	5	TRUE	FALSE	FALSE	TRUE	FALSE	FALSE	FALSE	FALSE	FALSE	FALSE	FALSE	FALSE	Nucleus	14	35	CHEMBL843	ROSIGLITAZONE MALEATE	TRUE	4	TRUE	Reactome	SUMO E3 ligases SUMOylate target proteins	2	7	0	0	0	7	1221
PPARG	ENSG00000132170	peroxisome proliferator activated receptor gamma	1186	5	TRUE	FALSE	FALSE	TRUE	FALSE	FALSE	FALSE	FALSE	FALSE	FALSE	FALSE	FALSE	Nucleus	14	35	CHEMBL121	ROSIGLITAZONE	TRUE	4	TRUE	Reactome	SUMOylation	2	7	0	0	0	7	1221
PPARG	ENSG00000132170	peroxisome proliferator activated receptor gamma	1186	5	TRUE	FALSE	FALSE	TRUE	FALSE	FALSE	FALSE	FALSE	FALSE	FALSE	FALSE	FALSE	Nucleus	14	35	CHEMBL121	ROSIGLITAZONE	TRUE	4	TRUE	Reactome	SUMOylation	2	7	0	0	0	7	1221
PPARG	ENSG00000132170	peroxisome proliferator activated receptor gamma	1186	5	TRUE	FALSE	FALSE	TRUE	FALSE	FALSE	FALSE	FALSE	FALSE	FALSE	FALSE	FALSE	Nucleus	14	35	CHEMBL595	PIOGLITAZONE	TRUE	4	FALSE	Reactome	SUMOylation	2	7	0	0	0	7	1221
PPARG	ENSG00000132170	peroxisome proliferator activated receptor gamma	1186	5	TRUE	FALSE	FALSE	TRUE	FALSE	FALSE	FALSE	FALSE	FALSE	FALSE	FALSE	FALSE	Nucleus	14	35	CHEMBL121	ROSIGLITAZONE	TRUE	4	TRUE	Reactome	SUMO E3 ligases SUMOylate target proteins	2	7	0	0	0	7	1221
PPARG	ENSG00000132170	peroxisome proliferator activated receptor gamma	1186	5	TRUE	FALSE	FALSE	TRUE	FALSE	FALSE	FALSE	FALSE	FALSE	FALSE	FALSE	FALSE	Nucleus	14	35	CHEMBL121	ROSIGLITAZONE	TRUE	4	TRUE	Reactome	SUMOylation	2	7	0	0	0	7	1221
PPARG	ENSG00000132170	peroxisome proliferator activated receptor gamma	1186	5	TRUE	FALSE	FALSE	TRUE	FALSE	FALSE	FALSE	FALSE	FALSE	FALSE	FALSE	FALSE	Nucleus	14	35	CHEMBL595	PIOGLITAZONE	TRUE	4	FALSE	Reactome	SUMO E3 ligases SUMOylate target proteins	2	7	0	0	0	7	1221
PPARG	ENSG00000132170	peroxisome proliferator activated receptor gamma	1186	5	TRUE	FALSE	FALSE	TRUE	FALSE	FALSE	FALSE	FALSE	FALSE	FALSE	FALSE	FALSE	Nucleus	14	35	CHEMBL704	MESALAMINE	TRUE	4	FALSE	Reactome	SUMOylation	2	7	0	0	0	7	1221
PPARG	ENSG00000132170	peroxisome proliferator activated receptor gamma	1186	5	TRUE	FALSE	FALSE	TRUE	FALSE	FALSE	FALSE	FALSE	FALSE	FALSE	FALSE	FALSE	Nucleus	14	35	CHEMBL595	PIOGLITAZONE	TRUE	4	FALSE	Reactome	SUMOylation	2	7	0	0	0	7	1221
PPARG	ENSG00000132170	peroxisome proliferator activated receptor gamma	1186	5	TRUE	FALSE	FALSE	TRUE	FALSE	FALSE	FALSE	FALSE	FALSE	FALSE	FALSE	FALSE	Nucleus	14	35	CHEMBL425	OLSALAZINE	TRUE	4	FALSE	Reactome	SUMO E3 ligases SUMOylate target proteins	2	7	0	0	0	7	1221
PPARG	ENSG00000132170	peroxisome proliferator activated receptor gamma	1186	5	TRUE	FALSE	FALSE	TRUE	FALSE	FALSE	FALSE	FALSE	FALSE	FALSE	FALSE	FALSE	Nucleus	14	35	CHEMBL843	ROSIGLITAZONE MALEATE	TRUE	4	TRUE	Reactome	SUMO E3 ligases SUMOylate target proteins	2	7	0	0	0	7	1221
PPARG	ENSG00000132170	peroxisome proliferator activated receptor gamma	1186	5	TRUE	FALSE	FALSE	TRUE	FALSE	FALSE	FALSE	FALSE	FALSE	FALSE	FALSE	FALSE	Nucleus	14	35	CHEMBL121	ROSIGLITAZONE	TRUE	4	TRUE	Reactome	SUMOylation	2	7	0	0	0	7	1221
PPARG	ENSG00000132170	peroxisome proliferator activated receptor gamma	1186	5	TRUE	FALSE	FALSE	TRUE	FALSE	FALSE	FALSE	FALSE	FALSE	FALSE	FALSE	FALSE	Nucleus	14	35	CHEMBL843	ROSIGLITAZONE MALEATE	TRUE	4	TRUE	Reactome	SUMOylation	2	7	0	0	0	7	1221
PPARG	ENSG00000132170	peroxisome proliferator activated receptor gamma	1186	5	TRUE	FALSE	FALSE	TRUE	FALSE	FALSE	FALSE	FALSE	FALSE	FALSE	FALSE	FALSE	Nucleus	14	35	CHEMBL704	MESALAMINE	TRUE	4	FALSE	Reactome	SUMO E3 ligases SUMOylate target proteins	2	7	0	0	0	7	1221
PPARG	ENSG00000132170	peroxisome proliferator activated receptor gamma	1186	5	TRUE	FALSE	FALSE	TRUE	FALSE	FALSE	FALSE	FALSE	FALSE	FALSE	FALSE	FALSE	Nucleus	14	35	CHEMBL595	PIOGLITAZONE	TRUE	4	FALSE	Reactome	SUMOylation	2	7	0	0	0	7	1221
PPARG	ENSG00000132170	peroxisome proliferator activated receptor gamma	1186	5	TRUE	FALSE	FALSE	TRUE	FALSE	FALSE	FALSE	FALSE	FALSE	FALSE	FALSE	FALSE	Nucleus	14	35	CHEMBL595	PIOGLITAZONE	TRUE	4	FALSE	Reactome	SUMOylation	2	7	0	0	0	7	1221
PPARG	ENSG00000132170	peroxisome proliferator activated receptor gamma	1186	5	TRUE	FALSE	FALSE	TRUE	FALSE	FALSE	FALSE	FALSE	FALSE	FALSE	FALSE	FALSE	Nucleus	14	35	CHEMBL595	PIOGLITAZONE	TRUE	4	FALSE	Reactome	SUMO E3 ligases SUMOylate target proteins	2	7	0	0	0	7	1221
PPARG	ENSG00000132170	peroxisome proliferator activated receptor gamma	1186	5	TRUE	FALSE	FALSE	TRUE	FALSE	FALSE	FALSE	FALSE	FALSE	FALSE	FALSE	FALSE	Nucleus	14	35	CHEMBL595	PIOGLITAZONE	TRUE	4	FALSE	Reactome	SUMO E3 ligases SUMOylate target proteins	2	7	0	0	0	7	1221
PPARG	ENSG00000132170	peroxisome proliferator activated receptor gamma	1186	5	TRUE	FALSE	FALSE	TRUE	FALSE	FALSE	FALSE	FALSE	FALSE	FALSE	FALSE	FALSE	Nucleus	14	35	CHEMBL425	OLSALAZINE	TRUE	4	FALSE	Reactome	SUMOylation	2	7	0	0	0	7	1221
PPARG	ENSG00000132170	peroxisome proliferator activated receptor gamma	1186	5	TRUE	FALSE	FALSE	TRUE	FALSE	FALSE	FALSE	FALSE	FALSE	FALSE	FALSE	FALSE	Nucleus	14	35	CHEMBL121	ROSIGLITAZONE	TRUE	4	TRUE	Reactome	SUMO E3 ligases SUMOylate target proteins	2	7	0	0	0	7	1221
PPARG	ENSG00000132170	peroxisome proliferator activated receptor gamma	1186	5	TRUE	FALSE	FALSE	TRUE	FALSE	FALSE	FALSE	FALSE	FALSE	FALSE	FALSE	FALSE	Nucleus	14	35	CHEMBL595	PIOGLITAZONE	TRUE	4	FALSE	Reactome	SUMO E3 ligases SUMOylate target proteins	2	7	0	0	0	7	1221
PPARG	ENSG00000132170	peroxisome proliferator activated receptor gamma	1186	5	TRUE	FALSE	FALSE	TRUE	FALSE	FALSE	FALSE	FALSE	FALSE	FALSE	FALSE	FALSE	Nucleus	14	35	CHEMBL595	PIOGLITAZONE	TRUE	4	FALSE	Reactome	SUMOylation	2	7	0	0	0	7	1221
PPARG	ENSG00000132170	peroxisome proliferator activated receptor gamma	1186	5	TRUE	FALSE	FALSE	TRUE	FALSE	FALSE	FALSE	FALSE	FALSE	FALSE	FALSE	FALSE	Nucleus	14	35	CHEMBL704	MESALAMINE	TRUE	4	FALSE	Reactome	SUMO E3 ligases SUMOylate target proteins	2	7	0	0	0	7	1221
PPARG	ENSG00000132170	peroxisome proliferator activated receptor gamma	1186	5	TRUE	FALSE	FALSE	TRUE	FALSE	FALSE	FALSE	FALSE	FALSE	FALSE	FALSE	FALSE	Nucleus	14	35	CHEMBL704	MESALAMINE	TRUE	4	FALSE	Reactome	SUMOylation	2	7	0	0	0	7	1221
PPARG	ENSG00000132170	peroxisome proliferator activated receptor gamma	1186	5	TRUE	FALSE	FALSE	TRUE	FALSE	FALSE	FALSE	FALSE	FALSE	FALSE	FALSE	FALSE	Nucleus	14	35	CHEMBL425	OLSALAZINE	TRUE	4	FALSE	Reactome	SUMO E3 ligases SUMOylate target proteins	2	7	0	0	0	7	1221
FASLG	ENSG00000117560	Fas ligand	1192	1	FALSE	FALSE	FALSE	FALSE	FALSE	FALSE	FALSE	FALSE	FALSE	FALSE	TRUE	FALSE	Cell membrane	0	1	CHEMBL4297886	ASUNERCEPT	FALSE	2	FALSE	Reactome	Cytokine Signaling in Immune system	1	0	0	1	0	0	1196
FASLG	ENSG00000117560	Fas ligand	1192	1	FALSE	FALSE	FALSE	FALSE	FALSE	FALSE	FALSE	FALSE	FALSE	FALSE	TRUE	FALSE	Cell membrane	0	1	CHEMBL4297886	ASUNERCEPT	FALSE	2	FALSE	Reactome	Cytokine Signaling in Immune system	1	0	0	1	0	0	1196
FASLG	ENSG00000117560	Fas ligand	1192	1	FALSE	FALSE	FALSE	FALSE	FALSE	FALSE	FALSE	FALSE	FALSE	FALSE	TRUE	FALSE	Cell membrane	0	1	CHEMBL4297886	ASUNERCEPT	FALSE	2	FALSE	Reactome	Cytokine Signaling in Immune system	1	0	0	1	0	0	1196
FASLG	ENSG00000117560	Fas ligand	1192	1	FALSE	FALSE	FALSE	FALSE	FALSE	FALSE	FALSE	FALSE	FALSE	FALSE	TRUE	FALSE	Cell membrane	0	1	CHEMBL4297886	ASUNERCEPT	FALSE	2	FALSE	Reactome	Cytokine Signaling in Immune system	1	0	0	1	0	0	1196
FASLG	ENSG00000117560	Fas ligand	1192	1	FALSE	FALSE	FALSE	FALSE	FALSE	FALSE	FALSE	FALSE	FALSE	FALSE	TRUE	FALSE	Cell membrane	0	1	CHEMBL4297886	ASUNERCEPT	FALSE	2	FALSE	Reactome	Cytokine Signaling in Immune system	1	0	0	1	0	0	1196
FASLG	ENSG00000117560	Fas ligand	1192	1	FALSE	FALSE	FALSE	FALSE	FALSE	FALSE	FALSE	FALSE	FALSE	FALSE	TRUE	FALSE	Cell membrane	0	1	CHEMBL4297886	ASUNERCEPT	FALSE	2	FALSE	Reactome	Cytokine Signaling in Immune system	1	0	0	1	0	0	1196
FASLG	ENSG00000117560	Fas ligand	1192	1	FALSE	FALSE	FALSE	FALSE	FALSE	FALSE	FALSE	FALSE	FALSE	FALSE	TRUE	FALSE	Cell membrane	0	1	CHEMBL4297886	ASUNERCEPT	FALSE	2	FALSE	Reactome	Cytokine Signaling in Immune system	1	0	0	1	0	0	1196
IFNA1	ENSG00000197919	interferon alpha 1	1147	1	FALSE	FALSE	FALSE	FALSE	FALSE	TRUE	FALSE	FALSE	FALSE	FALSE	FALSE	FALSE	Secreted	0	2	CHEMBL1743069	SIFALIMUMAB	FALSE	2	FALSE	Reactome	Cytokine Signaling in Immune system	2	0	0	2	0	0	1154
IFNA1	ENSG00000197919	interferon alpha 1	1147	1	FALSE	FALSE	FALSE	FALSE	FALSE	TRUE	FALSE	FALSE	FALSE	FALSE	FALSE	FALSE	Secreted	0	2	CHEMBL1743069	SIFALIMUMAB	FALSE	2	FALSE	Reactome	Interferon Signaling	2	0	0	2	0	0	1154
IFNA1	ENSG00000197919	interferon alpha 1	1147	1	FALSE	FALSE	FALSE	FALSE	FALSE	TRUE	FALSE	FALSE	FALSE	FALSE	FALSE	FALSE	Secreted	0	2	CHEMBL1743069	SIFALIMUMAB	FALSE	2	FALSE	Reactome	Cytokine Signaling in Immune system	2	0	0	2	0	0	1154
IFNA1	ENSG00000197919	interferon alpha 1	1147	1	FALSE	FALSE	FALSE	FALSE	FALSE	TRUE	FALSE	FALSE	FALSE	FALSE	FALSE	FALSE	Secreted	0	2	CHEMBL1743066	RONTALIZUMAB	FALSE	2	FALSE	Reactome	Cytokine Signaling in Immune system	2	0	0	2	0	0	1154
IFNA1	ENSG00000197919	interferon alpha 1	1147	1	FALSE	FALSE	FALSE	FALSE	FALSE	TRUE	FALSE	FALSE	FALSE	FALSE	FALSE	FALSE	Secreted	0	2	CHEMBL1743066	RONTALIZUMAB	FALSE	2	FALSE	Reactome	Interferon Signaling	2	0	0	2	0	0	1154
IFNA1	ENSG00000197919	interferon alpha 1	1147	1	FALSE	FALSE	FALSE	FALSE	FALSE	TRUE	FALSE	FALSE	FALSE	FALSE	FALSE	FALSE	Secreted	0	2	CHEMBL1743066	RONTALIZUMAB	FALSE	2	FALSE	Reactome	Interferon Signaling	2	0	0	2	0	0	1154
IFNA1	ENSG00000197919	interferon alpha 1	1147	1	FALSE	FALSE	FALSE	FALSE	FALSE	TRUE	FALSE	FALSE	FALSE	FALSE	FALSE	FALSE	Secreted	0	2	CHEMBL1743069	SIFALIMUMAB	FALSE	2	FALSE	Reactome	Interferon Signaling	2	0	0	2	0	0	1154
IFNA1	ENSG00000197919	interferon alpha 1	1147	1	FALSE	FALSE	FALSE	FALSE	FALSE	TRUE	FALSE	FALSE	FALSE	FALSE	FALSE	FALSE	Secreted	0	2	CHEMBL1743069	SIFALIMUMAB	FALSE	2	FALSE	Reactome	Interferon Signaling	2	0	0	2	0	0	1154
IFNA1	ENSG00000197919	interferon alpha 1	1147	1	FALSE	FALSE	FALSE	FALSE	FALSE	TRUE	FALSE	FALSE	FALSE	FALSE	FALSE	FALSE	Secreted	0	2	CHEMBL1743069	SIFALIMUMAB	FALSE	2	FALSE	Reactome	Cytokine Signaling in Immune system	2	0	0	2	0	0	1154
IFNA1	ENSG00000197919	interferon alpha 1	1147	1	FALSE	FALSE	FALSE	FALSE	FALSE	TRUE	FALSE	FALSE	FALSE	FALSE	FALSE	FALSE	Secreted	0	2	CHEMBL1743066	RONTALIZUMAB	FALSE	2	FALSE	Reactome	Cytokine Signaling in Immune system	2	0	0	2	0	0	1154
IFNA1	ENSG00000197919	interferon alpha 1	1147	1	FALSE	FALSE	FALSE	FALSE	FALSE	TRUE	FALSE	FALSE	FALSE	FALSE	FALSE	FALSE	Secreted	0	2	CHEMBL1743069	SIFALIMUMAB	FALSE	2	FALSE	Reactome	Cytokine Signaling in Immune system	2	0	0	2	0	0	1154
IFNA1	ENSG00000197919	interferon alpha 1	1147	1	FALSE	FALSE	FALSE	FALSE	FALSE	TRUE	FALSE	FALSE	FALSE	FALSE	FALSE	FALSE	Secreted	0	2	CHEMBL1743069	SIFALIMUMAB	FALSE	2	FALSE	Reactome	Interferon Signaling	2	0	0	2	0	0	1154
STAT3	ENSG00000168610	signal transducer and activator of transcription 3	1145	3	FALSE	FALSE	FALSE	TRUE	FALSE	FALSE	FALSE	FALSE	FALSE	FALSE	FALSE	FALSE	Cytoplasm	1	1	CHEMBL4297739	DANVATIRSEN	FALSE	2	FALSE	KEGG	HIF-1 signaling pathway	2	0	0	1	0	0	1150
STAT3	ENSG00000168610	signal transducer and activator of transcription 3	1145	3	FALSE	FALSE	FALSE	TRUE	FALSE	FALSE	FALSE	FALSE	FALSE	FALSE	FALSE	FALSE	Cytoplasm	1	1	CHEMBL4297739	DANVATIRSEN	FALSE	2	FALSE	Reactome	Cytokine Signaling in Immune system	2	0	0	1	0	0	1150
STAT3	ENSG00000168610	signal transducer and activator of transcription 3	1145	3	FALSE	FALSE	FALSE	TRUE	FALSE	FALSE	FALSE	FALSE	FALSE	FALSE	FALSE	FALSE	Cytoplasm	1	1	CHEMBL4297739	DANVATIRSEN	FALSE	2	FALSE	Reactome	Cytokine Signaling in Immune system	2	0	0	1	0	0	1150
STAT3	ENSG00000168610	signal transducer and activator of transcription 3	1145	3	FALSE	FALSE	FALSE	TRUE	FALSE	FALSE	FALSE	FALSE	FALSE	FALSE	FALSE	FALSE	Cytoplasm	1	1	CHEMBL4297739	DANVATIRSEN	FALSE	2	FALSE	KEGG	HIF-1 signaling pathway	2	0	0	1	0	0	1150
STAT3	ENSG00000168610	signal transducer and activator of transcription 3	1145	3	FALSE	FALSE	FALSE	TRUE	FALSE	FALSE	FALSE	FALSE	FALSE	FALSE	FALSE	FALSE	Cytoplasm	1	1	CHEMBL4297739	DANVATIRSEN	FALSE	2	FALSE	Reactome	Cytokine Signaling in Immune system	2	0	0	1	0	0	1150
STAT3	ENSG00000168610	signal transducer and activator of transcription 3	1145	3	FALSE	FALSE	FALSE	TRUE	FALSE	FALSE	FALSE	FALSE	FALSE	FALSE	FALSE	FALSE	Cytoplasm	1	1	CHEMBL4297739	DANVATIRSEN	FALSE	2	FALSE	Reactome	Cytokine Signaling in Immune system	2	0	0	1	0	0	1150
STAT3	ENSG00000168610	signal transducer and activator of transcription 3	1145	3	FALSE	FALSE	FALSE	TRUE	FALSE	FALSE	FALSE	FALSE	FALSE	FALSE	FALSE	FALSE	Cytoplasm	1	1	CHEMBL4297739	DANVATIRSEN	FALSE	2	FALSE	KEGG	HIF-1 signaling pathway	2	0	0	1	0	0	1150
STAT3	ENSG00000168610	signal transducer and activator of transcription 3	1145	3	FALSE	FALSE	FALSE	TRUE	FALSE	FALSE	FALSE	FALSE	FALSE	FALSE	FALSE	FALSE	Cytoplasm	1	1	CHEMBL4297739	DANVATIRSEN	FALSE	2	FALSE	Reactome	Cytokine Signaling in Immune system	2	0	0	1	0	0	1150
STAT3	ENSG00000168610	signal transducer and activator of transcription 3	1145	3	FALSE	FALSE	FALSE	TRUE	FALSE	FALSE	FALSE	FALSE	FALSE	FALSE	FALSE	FALSE	Cytoplasm	1	1	CHEMBL4297739	DANVATIRSEN	FALSE	2	FALSE	KEGG	HIF-1 signaling pathway	2	0	0	1	0	0	1150
STAT3	ENSG00000168610	signal transducer and activator of transcription 3	1145	3	FALSE	FALSE	FALSE	TRUE	FALSE	FALSE	FALSE	FALSE	FALSE	FALSE	FALSE	FALSE	Cytoplasm	1	1	CHEMBL4297739	DANVATIRSEN	FALSE	2	FALSE	KEGG	HIF-1 signaling pathway	2	0	0	1	0	0	1150
STAT3	ENSG00000168610	signal transducer and activator of transcription 3	1145	3	FALSE	FALSE	FALSE	TRUE	FALSE	FALSE	FALSE	FALSE	FALSE	FALSE	FALSE	FALSE	Cytoplasm	1	1	CHEMBL4297739	DANVATIRSEN	FALSE	2	FALSE	Reactome	Cytokine Signaling in Immune system	2	0	0	1	0	0	1150
STAT3	ENSG00000168610	signal transducer and activator of transcription 3	1145	3	FALSE	FALSE	FALSE	TRUE	FALSE	FALSE	FALSE	FALSE	FALSE	FALSE	FALSE	FALSE	Cytoplasm	1	1	CHEMBL4297739	DANVATIRSEN	FALSE	2	FALSE	Reactome	Cytokine Signaling in Immune system	2	0	0	1	0	0	1150
STAT3	ENSG00000168610	signal transducer and activator of transcription 3	1145	3	FALSE	FALSE	FALSE	TRUE	FALSE	FALSE	FALSE	FALSE	FALSE	FALSE	FALSE	FALSE	Cytoplasm	1	1	CHEMBL4297739	DANVATIRSEN	FALSE	2	FALSE	KEGG	HIF-1 signaling pathway	2	0	0	1	0	0	1150
STAT3	ENSG00000168610	signal transducer and activator of transcription 3	1145	3	FALSE	FALSE	FALSE	TRUE	FALSE	FALSE	FALSE	FALSE	FALSE	FALSE	FALSE	FALSE	Cytoplasm	1	1	CHEMBL4297739	DANVATIRSEN	FALSE	2	FALSE	Reactome	Cytokine Signaling in Immune system	2	0	0	1	0	0	1150
STAT3	ENSG00000168610	signal transducer and activator of transcription 3	1145	3	FALSE	FALSE	FALSE	TRUE	FALSE	FALSE	FALSE	FALSE	FALSE	FALSE	FALSE	FALSE	Cytoplasm	1	1	CHEMBL4297739	DANVATIRSEN	FALSE	2	FALSE	KEGG	HIF-1 signaling pathway	2	0	0	1	0	0	1150
STAT3	ENSG00000168610	signal transducer and activator of transcription 3	1145	3	FALSE	FALSE	FALSE	TRUE	FALSE	FALSE	FALSE	FALSE	FALSE	FALSE	FALSE	FALSE	Cytoplasm	1	1	CHEMBL4297739	DANVATIRSEN	FALSE	2	FALSE	KEGG	HIF-1 signaling pathway	2	0	0	1	0	0	1150
STAT3	ENSG00000168610	signal transducer and activator of transcription 3	1145	3	FALSE	FALSE	FALSE	TRUE	FALSE	FALSE	FALSE	FALSE	FALSE	FALSE	FALSE	FALSE	Cytoplasm	1	1	CHEMBL4297739	DANVATIRSEN	FALSE	2	FALSE	Reactome	Cytokine Signaling in Immune system	2	0	0	1	0	0	1150
STAT3	ENSG00000168610	signal transducer and activator of transcription 3	1145	3	FALSE	FALSE	FALSE	TRUE	FALSE	FALSE	FALSE	FALSE	FALSE	FALSE	FALSE	FALSE	Cytoplasm	1	1	CHEMBL4297739	DANVATIRSEN	FALSE	2	FALSE	KEGG	HIF-1 signaling pathway	2	0	0	1	0	0	1150
ICAM1	ENSG00000090339	intercellular adhesion molecule 1	1126	3	FALSE	FALSE	FALSE	TRUE	FALSE	TRUE	FALSE	FALSE	FALSE	FALSE	FALSE	FALSE	Membrane	2	2	CHEMBL2108326	ALICAFORSEN	FALSE	3	FALSE	Reactome	Cytokine Signaling in Immune system	2	0	1	1	0	0	1131.5
ICAM1	ENSG00000090339	intercellular adhesion molecule 1	1126	3	FALSE	FALSE	FALSE	TRUE	FALSE	TRUE	FALSE	FALSE	FALSE	FALSE	FALSE	FALSE	Membrane	2	2	CHEMBL2109482	BI-505	FALSE	2	FALSE	Reactome	Interferon Signaling	2	0	1	1	0	0	1131.5
ICAM1	ENSG00000090339	intercellular adhesion molecule 1	1126	3	FALSE	FALSE	FALSE	TRUE	FALSE	TRUE	FALSE	FALSE	FALSE	FALSE	FALSE	FALSE	Membrane	2	2	CHEMBL2108326	ALICAFORSEN	FALSE	3	FALSE	Reactome	Interferon Signaling	2	0	1	1	0	0	1131.5
ICAM1	ENSG00000090339	intercellular adhesion molecule 1	1126	3	FALSE	FALSE	FALSE	TRUE	FALSE	TRUE	FALSE	FALSE	FALSE	FALSE	FALSE	FALSE	Membrane	2	2	CHEMBL2108326	ALICAFORSEN	FALSE	3	FALSE	Reactome	Cytokine Signaling in Immune system	2	0	1	1	0	0	1131.5
ICAM1	ENSG00000090339	intercellular adhesion molecule 1	1126	3	FALSE	FALSE	FALSE	TRUE	FALSE	TRUE	FALSE	FALSE	FALSE	FALSE	FALSE	FALSE	Membrane	2	2	CHEMBL2108326	ALICAFORSEN	FALSE	3	FALSE	Reactome	Interferon Signaling	2	0	1	1	0	0	1131.5
ICAM1	ENSG00000090339	intercellular adhesion molecule 1	1126	3	FALSE	FALSE	FALSE	TRUE	FALSE	TRUE	FALSE	FALSE	FALSE	FALSE	FALSE	FALSE	Membrane	2	2	CHEMBL2108326	ALICAFORSEN	FALSE	3	FALSE	Reactome	Interferon Signaling	2	0	1	1	0	0	1131.5
ICAM1	ENSG00000090339	intercellular adhesion molecule 1	1126	3	FALSE	FALSE	FALSE	TRUE	FALSE	TRUE	FALSE	FALSE	FALSE	FALSE	FALSE	FALSE	Membrane	2	2	CHEMBL2108326	ALICAFORSEN	FALSE	3	FALSE	Reactome	Cytokine Signaling in Immune system	2	0	1	1	0	0	1131.5
ICAM1	ENSG00000090339	intercellular adhesion molecule 1	1126	3	FALSE	FALSE	FALSE	TRUE	FALSE	TRUE	FALSE	FALSE	FALSE	FALSE	FALSE	FALSE	Membrane	2	2	CHEMBL2108326	ALICAFORSEN	FALSE	3	FALSE	Reactome	Interferon Signaling	2	0	1	1	0	0	1131.5
ICAM1	ENSG00000090339	intercellular adhesion molecule 1	1126	3	FALSE	FALSE	FALSE	TRUE	FALSE	TRUE	FALSE	FALSE	FALSE	FALSE	FALSE	FALSE	Membrane	2	2	CHEMBL2109482	BI-505	FALSE	2	FALSE	Reactome	Cytokine Signaling in Immune system	2	0	1	1	0	0	1131.5
ICAM1	ENSG00000090339	intercellular adhesion molecule 1	1126	3	FALSE	FALSE	FALSE	TRUE	FALSE	TRUE	FALSE	FALSE	FALSE	FALSE	FALSE	FALSE	Membrane	2	2	CHEMBL2109482	BI-505	FALSE	2	FALSE	Reactome	Cytokine Signaling in Immune system	2	0	1	1	0	0	1131.5
ICAM1	ENSG00000090339	intercellular adhesion molecule 1	1126	3	FALSE	FALSE	FALSE	TRUE	FALSE	TRUE	FALSE	FALSE	FALSE	FALSE	FALSE	FALSE	Membrane	2	2	CHEMBL2109482	BI-505	FALSE	2	FALSE	Reactome	Interferon Signaling	2	0	1	1	0	0	1131.5
ICAM1	ENSG00000090339	intercellular adhesion molecule 1	1126	3	FALSE	FALSE	FALSE	TRUE	FALSE	TRUE	FALSE	FALSE	FALSE	FALSE	FALSE	FALSE	Membrane	2	2	CHEMBL2109482	BI-505	FALSE	2	FALSE	Reactome	Interferon Signaling	2	0	1	1	0	0	1131.5
ICAM1	ENSG00000090339	intercellular adhesion molecule 1	1126	3	FALSE	FALSE	FALSE	TRUE	FALSE	TRUE	FALSE	FALSE	FALSE	FALSE	FALSE	FALSE	Membrane	2	2	CHEMBL2109482	BI-505	FALSE	2	FALSE	Reactome	Cytokine Signaling in Immune system	2	0	1	1	0	0	1131.5
ICAM1	ENSG00000090339	intercellular adhesion molecule 1	1126	3	FALSE	FALSE	FALSE	TRUE	FALSE	TRUE	FALSE	FALSE	FALSE	FALSE	FALSE	FALSE	Membrane	2	2	CHEMBL2108326	ALICAFORSEN	FALSE	3	FALSE	Reactome	Cytokine Signaling in Immune system	2	0	1	1	0	0	1131.5
AR	ENSG00000169083	androgen receptor	1088	5	TRUE	FALSE	FALSE	TRUE	FALSE	FALSE	FALSE	TRUE	FALSE	FALSE	FALSE	FALSE	Nucleus	34	34	CHEMBL386630	TESTOSTERONE	TRUE	4	FALSE	Reactome	SUMOylation	2	12	0	0	0	12	1097
AR	ENSG00000169083	androgen receptor	1088	5	TRUE	FALSE	FALSE	TRUE	FALSE	FALSE	FALSE	TRUE	FALSE	FALSE	FALSE	FALSE	Nucleus	34	34	CHEMBL254328	ABIRATERONE	TRUE	4	FALSE	Reactome	SUMO E3 ligases SUMOylate target proteins	2	12	0	0	0	12	1097
AR	ENSG00000169083	androgen receptor	1088	5	TRUE	FALSE	FALSE	TRUE	FALSE	FALSE	FALSE	TRUE	FALSE	FALSE	FALSE	FALSE	Nucleus	34	34	CHEMBL1395	METHYLTESTOSTERONE	TRUE	4	FALSE	Reactome	SUMOylation	2	12	0	0	0	12	1097
AR	ENSG00000169083	androgen receptor	1088	5	TRUE	FALSE	FALSE	TRUE	FALSE	FALSE	FALSE	TRUE	FALSE	FALSE	FALSE	FALSE	Nucleus	34	34	CHEMBL409	BICALUTAMIDE	TRUE	4	FALSE	Reactome	SUMOylation	2	12	0	0	0	12	1097
AR	ENSG00000169083	androgen receptor	1088	5	TRUE	FALSE	FALSE	TRUE	FALSE	FALSE	FALSE	TRUE	FALSE	FALSE	FALSE	FALSE	Nucleus	34	34	CHEMBL1200335	TESTOSTERONE ENANTHATE	TRUE	4	FALSE	Reactome	SUMOylation	2	12	0	0	0	12	1097
AR	ENSG00000169083	androgen receptor	1088	5	TRUE	FALSE	FALSE	TRUE	FALSE	FALSE	FALSE	TRUE	FALSE	FALSE	FALSE	FALSE	Nucleus	34	34	CHEMBL4297185	DAROLUTAMIDE	TRUE	4	FALSE	Reactome	SUMOylation	2	12	0	0	0	12	1097
AR	ENSG00000169083	androgen receptor	1088	5	TRUE	FALSE	FALSE	TRUE	FALSE	FALSE	FALSE	TRUE	FALSE	FALSE	FALSE	FALSE	Nucleus	34	34	CHEMBL386630	TESTOSTERONE	TRUE	4	FALSE	Reactome	SUMO E3 ligases SUMOylate target proteins	2	12	0	0	0	12	1097
AR	ENSG00000169083	androgen receptor	1088	5	TRUE	FALSE	FALSE	TRUE	FALSE	FALSE	FALSE	TRUE	FALSE	FALSE	FALSE	FALSE	Nucleus	34	34	CHEMBL1395	METHYLTESTOSTERONE	TRUE	4	FALSE	Reactome	SUMOylation	2	12	0	0	0	12	1097
AR	ENSG00000169083	androgen receptor	1088	5	TRUE	FALSE	FALSE	TRUE	FALSE	FALSE	FALSE	TRUE	FALSE	FALSE	FALSE	FALSE	Nucleus	34	34	CHEMBL2107067	TESTOSTERONE UNDECANOATE	TRUE	4	FALSE	Reactome	SUMO E3 ligases SUMOylate target proteins	2	12	0	0	0	12	1097
AR	ENSG00000169083	androgen receptor	1088	5	TRUE	FALSE	FALSE	TRUE	FALSE	FALSE	FALSE	TRUE	FALSE	FALSE	FALSE	FALSE	Nucleus	34	34	CHEMBL386630	TESTOSTERONE	TRUE	4	FALSE	Reactome	SUMOylation	2	12	0	0	0	12	1097
AR	ENSG00000169083	androgen receptor	1088	5	TRUE	FALSE	FALSE	TRUE	FALSE	FALSE	FALSE	TRUE	FALSE	FALSE	FALSE	FALSE	Nucleus	34	34	CHEMBL386630	TESTOSTERONE	TRUE	4	FALSE	Reactome	SUMO E3 ligases SUMOylate target proteins	2	12	0	0	0	12	1097
AR	ENSG00000169083	androgen receptor	1088	5	TRUE	FALSE	FALSE	TRUE	FALSE	FALSE	FALSE	TRUE	FALSE	FALSE	FALSE	FALSE	Nucleus	34	34	CHEMBL3183409	APALUTAMIDE	TRUE	4	FALSE	Reactome	SUMOylation	2	12	0	0	0	12	1097
AR	ENSG00000169083	androgen receptor	1088	5	TRUE	FALSE	FALSE	TRUE	FALSE	FALSE	FALSE	TRUE	FALSE	FALSE	FALSE	FALSE	Nucleus	34	34	CHEMBL386630	TESTOSTERONE	TRUE	4	FALSE	Reactome	SUMO E3 ligases SUMOylate target proteins	2	12	0	0	0	12	1097
AR	ENSG00000169083	androgen receptor	1088	5	TRUE	FALSE	FALSE	TRUE	FALSE	FALSE	FALSE	TRUE	FALSE	FALSE	FALSE	FALSE	Nucleus	34	34	CHEMBL1082407	ENZALUTAMIDE	TRUE	4	FALSE	Reactome	SUMO E3 ligases SUMOylate target proteins	2	12	0	0	0	12	1097
AR	ENSG00000169083	androgen receptor	1088	5	TRUE	FALSE	FALSE	TRUE	FALSE	FALSE	FALSE	TRUE	FALSE	FALSE	FALSE	FALSE	Nucleus	34	34	CHEMBL386630	TESTOSTERONE	TRUE	4	FALSE	Reactome	SUMO E3 ligases SUMOylate target proteins	2	12	0	0	0	12	1097
AR	ENSG00000169083	androgen receptor	1088	5	TRUE	FALSE	FALSE	TRUE	FALSE	FALSE	FALSE	TRUE	FALSE	FALSE	FALSE	FALSE	Nucleus	34	34	CHEMBL139835	CYPROTERONE ACETATE	TRUE	4	FALSE	Reactome	SUMO E3 ligases SUMOylate target proteins	2	12	0	0	0	12	1097
AR	ENSG00000169083	androgen receptor	1088	5	TRUE	FALSE	FALSE	TRUE	FALSE	FALSE	FALSE	TRUE	FALSE	FALSE	FALSE	FALSE	Nucleus	34	34	CHEMBL806	FLUTAMIDE	TRUE	4	FALSE	Reactome	SUMOylation	2	12	0	0	0	12	1097
AR	ENSG00000169083	androgen receptor	1088	5	TRUE	FALSE	FALSE	TRUE	FALSE	FALSE	FALSE	TRUE	FALSE	FALSE	FALSE	FALSE	Nucleus	34	34	CHEMBL139835	CYPROTERONE ACETATE	TRUE	4	FALSE	Reactome	SUMO E3 ligases SUMOylate target proteins	2	12	0	0	0	12	1097
AR	ENSG00000169083	androgen receptor	1088	5	TRUE	FALSE	FALSE	TRUE	FALSE	FALSE	FALSE	TRUE	FALSE	FALSE	FALSE	FALSE	Nucleus	34	34	CHEMBL386630	TESTOSTERONE	TRUE	4	FALSE	Reactome	SUMOylation	2	12	0	0	0	12	1097
AR	ENSG00000169083	androgen receptor	1088	5	TRUE	FALSE	FALSE	TRUE	FALSE	FALSE	FALSE	TRUE	FALSE	FALSE	FALSE	FALSE	Nucleus	34	34	CHEMBL2107067	TESTOSTERONE UNDECANOATE	TRUE	4	FALSE	Reactome	SUMOylation	2	12	0	0	0	12	1097
AR	ENSG00000169083	androgen receptor	1088	5	TRUE	FALSE	FALSE	TRUE	FALSE	FALSE	FALSE	TRUE	FALSE	FALSE	FALSE	FALSE	Nucleus	34	34	CHEMBL1274	NILUTAMIDE	TRUE	4	FALSE	Reactome	SUMOylation	2	12	0	0	0	12	1097
AR	ENSG00000169083	androgen receptor	1088	5	TRUE	FALSE	FALSE	TRUE	FALSE	FALSE	FALSE	TRUE	FALSE	FALSE	FALSE	FALSE	Nucleus	34	34	CHEMBL139835	CYPROTERONE ACETATE	TRUE	4	FALSE	Reactome	SUMOylation	2	12	0	0	0	12	1097
AR	ENSG00000169083	androgen receptor	1088	5	TRUE	FALSE	FALSE	TRUE	FALSE	FALSE	FALSE	TRUE	FALSE	FALSE	FALSE	FALSE	Nucleus	34	34	CHEMBL386630	TESTOSTERONE	TRUE	4	FALSE	Reactome	SUMOylation	2	12	0	0	0	12	1097
AR	ENSG00000169083	androgen receptor	1088	5	TRUE	FALSE	FALSE	TRUE	FALSE	FALSE	FALSE	TRUE	FALSE	FALSE	FALSE	FALSE	Nucleus	34	34	CHEMBL2107067	TESTOSTERONE UNDECANOATE	TRUE	4	FALSE	Reactome	SUMO E3 ligases SUMOylate target proteins	2	12	0	0	0	12	1097
AR	ENSG00000169083	androgen receptor	1088	5	TRUE	FALSE	FALSE	TRUE	FALSE	FALSE	FALSE	TRUE	FALSE	FALSE	FALSE	FALSE	Nucleus	34	34	CHEMBL3183409	APALUTAMIDE	TRUE	4	FALSE	Reactome	SUMO E3 ligases SUMOylate target proteins	2	12	0	0	0	12	1097
AR	ENSG00000169083	androgen receptor	1088	5	TRUE	FALSE	FALSE	TRUE	FALSE	FALSE	FALSE	TRUE	FALSE	FALSE	FALSE	FALSE	Nucleus	34	34	CHEMBL4297185	DAROLUTAMIDE	TRUE	4	FALSE	Reactome	SUMO E3 ligases SUMOylate target proteins	2	12	0	0	0	12	1097
AR	ENSG00000169083	androgen receptor	1088	5	TRUE	FALSE	FALSE	TRUE	FALSE	FALSE	FALSE	TRUE	FALSE	FALSE	FALSE	FALSE	Nucleus	34	34	CHEMBL139835	CYPROTERONE ACETATE	TRUE	4	FALSE	Reactome	SUMO E3 ligases SUMOylate target proteins	2	12	0	0	0	12	1097
AR	ENSG00000169083	androgen receptor	1088	5	TRUE	FALSE	FALSE	TRUE	FALSE	FALSE	FALSE	TRUE	FALSE	FALSE	FALSE	FALSE	Nucleus	34	34	CHEMBL386630	TESTOSTERONE	TRUE	4	FALSE	Reactome	SUMOylation	2	12	0	0	0	12	1097
AR	ENSG00000169083	androgen receptor	1088	5	TRUE	FALSE	FALSE	TRUE	FALSE	FALSE	FALSE	TRUE	FALSE	FALSE	FALSE	FALSE	Nucleus	34	34	CHEMBL409	BICALUTAMIDE	TRUE	4	FALSE	Reactome	SUMO E3 ligases SUMOylate target proteins	2	12	0	0	0	12	1097
AR	ENSG00000169083	androgen receptor	1088	5	TRUE	FALSE	FALSE	TRUE	FALSE	FALSE	FALSE	TRUE	FALSE	FALSE	FALSE	FALSE	Nucleus	34	34	CHEMBL139835	CYPROTERONE ACETATE	TRUE	4	FALSE	Reactome	SUMOylation	2	12	0	0	0	12	1097
AR	ENSG00000169083	androgen receptor	1088	5	TRUE	FALSE	FALSE	TRUE	FALSE	FALSE	FALSE	TRUE	FALSE	FALSE	FALSE	FALSE	Nucleus	34	34	CHEMBL1395	METHYLTESTOSTERONE	TRUE	4	FALSE	Reactome	SUMO E3 ligases SUMOylate target proteins	2	12	0	0	0	12	1097
AR	ENSG00000169083	androgen receptor	1088	5	TRUE	FALSE	FALSE	TRUE	FALSE	FALSE	FALSE	TRUE	FALSE	FALSE	FALSE	FALSE	Nucleus	34	34	CHEMBL1082407	ENZALUTAMIDE	TRUE	4	FALSE	Reactome	SUMOylation	2	12	0	0	0	12	1097
AR	ENSG00000169083	androgen receptor	1088	5	TRUE	FALSE	FALSE	TRUE	FALSE	FALSE	FALSE	TRUE	FALSE	FALSE	FALSE	FALSE	Nucleus	34	34	CHEMBL1274	NILUTAMIDE	TRUE	4	FALSE	Reactome	SUMO E3 ligases SUMOylate target proteins	2	12	0	0	0	12	1097
AR	ENSG00000169083	androgen receptor	1088	5	TRUE	FALSE	FALSE	TRUE	FALSE	FALSE	FALSE	TRUE	FALSE	FALSE	FALSE	FALSE	Nucleus	34	34	CHEMBL1082407	ENZALUTAMIDE	TRUE	4	FALSE	Reactome	SUMO E3 ligases SUMOylate target proteins	2	12	0	0	0	12	1097
AR	ENSG00000169083	androgen receptor	1088	5	TRUE	FALSE	FALSE	TRUE	FALSE	FALSE	FALSE	TRUE	FALSE	FALSE	FALSE	FALSE	Nucleus	34	34	CHEMBL806	FLUTAMIDE	TRUE	4	FALSE	Reactome	SUMO E3 ligases SUMOylate target proteins	2	12	0	0	0	12	1097
AR	ENSG00000169083	androgen receptor	1088	5	TRUE	FALSE	FALSE	TRUE	FALSE	FALSE	FALSE	TRUE	FALSE	FALSE	FALSE	FALSE	Nucleus	34	34	CHEMBL1395	METHYLTESTOSTERONE	TRUE	4	FALSE	Reactome	SUMO E3 ligases SUMOylate target proteins	2	12	0	0	0	12	1097
AR	ENSG00000169083	androgen receptor	1088	5	TRUE	FALSE	FALSE	TRUE	FALSE	FALSE	FALSE	TRUE	FALSE	FALSE	FALSE	FALSE	Nucleus	34	34	CHEMBL3183409	APALUTAMIDE	TRUE	4	FALSE	Reactome	SUMO E3 ligases SUMOylate target proteins	2	12	0	0	0	12	1097
AR	ENSG00000169083	androgen receptor	1088	5	TRUE	FALSE	FALSE	TRUE	FALSE	FALSE	FALSE	TRUE	FALSE	FALSE	FALSE	FALSE	Nucleus	34	34	CHEMBL1082407	ENZALUTAMIDE	TRUE	4	FALSE	Reactome	SUMOylation	2	12	0	0	0	12	1097
AR	ENSG00000169083	androgen receptor	1088	5	TRUE	FALSE	FALSE	TRUE	FALSE	FALSE	FALSE	TRUE	FALSE	FALSE	FALSE	FALSE	Nucleus	34	34	CHEMBL386630	TESTOSTERONE	TRUE	4	FALSE	Reactome	SUMOylation	2	12	0	0	0	12	1097
AR	ENSG00000169083	androgen receptor	1088	5	TRUE	FALSE	FALSE	TRUE	FALSE	FALSE	FALSE	TRUE	FALSE	FALSE	FALSE	FALSE	Nucleus	34	34	CHEMBL386630	TESTOSTERONE	TRUE	4	FALSE	Reactome	SUMOylation	2	12	0	0	0	12	1097
AR	ENSG00000169083	androgen receptor	1088	5	TRUE	FALSE	FALSE	TRUE	FALSE	FALSE	FALSE	TRUE	FALSE	FALSE	FALSE	FALSE	Nucleus	34	34	CHEMBL386630	TESTOSTERONE	TRUE	4	FALSE	Reactome	SUMO E3 ligases SUMOylate target proteins	2	12	0	0	0	12	1097
AR	ENSG00000169083	androgen receptor	1088	5	TRUE	FALSE	FALSE	TRUE	FALSE	FALSE	FALSE	TRUE	FALSE	FALSE	FALSE	FALSE	Nucleus	34	34	CHEMBL386630	TESTOSTERONE	TRUE	4	FALSE	Reactome	SUMO E3 ligases SUMOylate target proteins	2	12	0	0	0	12	1097
AR	ENSG00000169083	androgen receptor	1088	5	TRUE	FALSE	FALSE	TRUE	FALSE	FALSE	FALSE	TRUE	FALSE	FALSE	FALSE	FALSE	Nucleus	34	34	CHEMBL386630	TESTOSTERONE	TRUE	4	FALSE	Reactome	SUMO E3 ligases SUMOylate target proteins	2	12	0	0	0	12	1097
AR	ENSG00000169083	androgen receptor	1088	5	TRUE	FALSE	FALSE	TRUE	FALSE	FALSE	FALSE	TRUE	FALSE	FALSE	FALSE	FALSE	Nucleus	34	34	CHEMBL1200335	TESTOSTERONE ENANTHATE	TRUE	4	FALSE	Reactome	SUMO E3 ligases SUMOylate target proteins	2	12	0	0	0	12	1097
AR	ENSG00000169083	androgen receptor	1088	5	TRUE	FALSE	FALSE	TRUE	FALSE	FALSE	FALSE	TRUE	FALSE	FALSE	FALSE	FALSE	Nucleus	34	34	CHEMBL1082407	ENZALUTAMIDE	TRUE	4	FALSE	Reactome	SUMO E3 ligases SUMOylate target proteins	2	12	0	0	0	12	1097
AR	ENSG00000169083	androgen receptor	1088	5	TRUE	FALSE	FALSE	TRUE	FALSE	FALSE	FALSE	TRUE	FALSE	FALSE	FALSE	FALSE	Nucleus	34	34	CHEMBL139835	CYPROTERONE ACETATE	TRUE	4	FALSE	Reactome	SUMOylation	2	12	0	0	0	12	1097
AR	ENSG00000169083	androgen receptor	1088	5	TRUE	FALSE	FALSE	TRUE	FALSE	FALSE	FALSE	TRUE	FALSE	FALSE	FALSE	FALSE	Nucleus	34	34	CHEMBL1082407	ENZALUTAMIDE	TRUE	4	FALSE	Reactome	SUMOylation	2	12	0	0	0	12	1097
AR	ENSG00000169083	androgen receptor	1088	5	TRUE	FALSE	FALSE	TRUE	FALSE	FALSE	FALSE	TRUE	FALSE	FALSE	FALSE	FALSE	Nucleus	34	34	CHEMBL3183409	APALUTAMIDE	TRUE	4	FALSE	Reactome	SUMOylation	2	12	0	0	0	12	1097
AR	ENSG00000169083	androgen receptor	1088	5	TRUE	FALSE	FALSE	TRUE	FALSE	FALSE	FALSE	TRUE	FALSE	FALSE	FALSE	FALSE	Nucleus	34	34	CHEMBL254328	ABIRATERONE	TRUE	4	FALSE	Reactome	SUMOylation	2	12	0	0	0	12	1097
AR	ENSG00000169083	androgen receptor	1088	5	TRUE	FALSE	FALSE	TRUE	FALSE	FALSE	FALSE	TRUE	FALSE	FALSE	FALSE	FALSE	Nucleus	34	34	CHEMBL2107067	TESTOSTERONE UNDECANOATE	TRUE	4	FALSE	Reactome	SUMOylation	2	12	0	0	0	12	1097
VDR	ENSG00000111424	vitamin D receptor	1048	5	TRUE	FALSE	FALSE	TRUE	FALSE	FALSE	FALSE	FALSE	FALSE	FALSE	FALSE	FALSE	Nucleus	1	17	CHEMBL1042	CHOLECALCIFEROL	TRUE	4	FALSE	Reactome	SUMO E3 ligases SUMOylate target proteins	2	8	0	0	0	8	1094
VDR	ENSG00000111424	vitamin D receptor	1048	5	TRUE	FALSE	FALSE	TRUE	FALSE	FALSE	FALSE	FALSE	FALSE	FALSE	FALSE	FALSE	Nucleus	1	17	CHEMBL1536	ERGOCALCIFEROL	TRUE	4	FALSE	Reactome	SUMOylation	2	8	0	0	0	8	1094
VDR	ENSG00000111424	vitamin D receptor	1048	5	TRUE	FALSE	FALSE	TRUE	FALSE	FALSE	FALSE	FALSE	FALSE	FALSE	FALSE	FALSE	Nucleus	1	17	CHEMBL846	CALCITRIOL	TRUE	4	FALSE	Reactome	SUMO E3 ligases SUMOylate target proteins	2	8	0	0	0	8	1094
VDR	ENSG00000111424	vitamin D receptor	1048	5	TRUE	FALSE	FALSE	TRUE	FALSE	FALSE	FALSE	FALSE	FALSE	FALSE	FALSE	FALSE	Nucleus	1	17	CHEMBL1200622	PARICALCITOL	TRUE	4	FALSE	Reactome	SUMO E3 ligases SUMOylate target proteins	2	8	0	0	0	8	1094
VDR	ENSG00000111424	vitamin D receptor	1048	5	TRUE	FALSE	FALSE	TRUE	FALSE	FALSE	FALSE	FALSE	FALSE	FALSE	FALSE	FALSE	Nucleus	1	17	CHEMBL3544909	CALCIFEDIOL	TRUE	4	FALSE	Reactome	SUMO E3 ligases SUMOylate target proteins	2	8	0	0	0	8	1094
VDR	ENSG00000111424	vitamin D receptor	1048	5	TRUE	FALSE	FALSE	TRUE	FALSE	FALSE	FALSE	FALSE	FALSE	FALSE	FALSE	FALSE	Nucleus	1	17	CHEMBL1536	ERGOCALCIFEROL	TRUE	4	FALSE	Reactome	SUMOylation	2	8	0	0	0	8	1094
VDR	ENSG00000111424	vitamin D receptor	1048	5	TRUE	FALSE	FALSE	TRUE	FALSE	FALSE	FALSE	FALSE	FALSE	FALSE	FALSE	FALSE	Nucleus	1	17	CHEMBL1042	CHOLECALCIFEROL	TRUE	4	FALSE	Reactome	SUMOylation	2	8	0	0	0	8	1094
VDR	ENSG00000111424	vitamin D receptor	1048	5	TRUE	FALSE	FALSE	TRUE	FALSE	FALSE	FALSE	FALSE	FALSE	FALSE	FALSE	FALSE	Nucleus	1	17	CHEMBL1601669	ALFACALCIDOL	TRUE	4	FALSE	Reactome	SUMOylation	2	8	0	0	0	8	1094
VDR	ENSG00000111424	vitamin D receptor	1048	5	TRUE	FALSE	FALSE	TRUE	FALSE	FALSE	FALSE	FALSE	FALSE	FALSE	FALSE	FALSE	Nucleus	1	17	CHEMBL1601669	ALFACALCIDOL	TRUE	4	FALSE	Reactome	SUMO E3 ligases SUMOylate target proteins	2	8	0	0	0	8	1094
VDR	ENSG00000111424	vitamin D receptor	1048	5	TRUE	FALSE	FALSE	TRUE	FALSE	FALSE	FALSE	FALSE	FALSE	FALSE	FALSE	FALSE	Nucleus	1	17	CHEMBL1042	CHOLECALCIFEROL	TRUE	4	FALSE	Reactome	SUMO E3 ligases SUMOylate target proteins	2	8	0	0	0	8	1094
VDR	ENSG00000111424	vitamin D receptor	1048	5	TRUE	FALSE	FALSE	TRUE	FALSE	FALSE	FALSE	FALSE	FALSE	FALSE	FALSE	FALSE	Nucleus	1	17	CHEMBL846	CALCITRIOL	TRUE	4	FALSE	Reactome	SUMOylation	2	8	0	0	0	8	1094
VDR	ENSG00000111424	vitamin D receptor	1048	5	TRUE	FALSE	FALSE	TRUE	FALSE	FALSE	FALSE	FALSE	FALSE	FALSE	FALSE	FALSE	Nucleus	1	17	CHEMBL846	CALCITRIOL	TRUE	4	FALSE	Reactome	SUMO E3 ligases SUMOylate target proteins	2	8	0	0	0	8	1094
VDR	ENSG00000111424	vitamin D receptor	1048	5	TRUE	FALSE	FALSE	TRUE	FALSE	FALSE	FALSE	FALSE	FALSE	FALSE	FALSE	FALSE	Nucleus	1	17	CHEMBL1200666	CALCIPOTRIENE	TRUE	4	FALSE	Reactome	SUMO E3 ligases SUMOylate target proteins	2	8	0	0	0	8	1094
VDR	ENSG00000111424	vitamin D receptor	1048	5	TRUE	FALSE	FALSE	TRUE	FALSE	FALSE	FALSE	FALSE	FALSE	FALSE	FALSE	FALSE	Nucleus	1	17	CHEMBL1536	ERGOCALCIFEROL	TRUE	4	FALSE	Reactome	SUMOylation	2	8	0	0	0	8	1094
VDR	ENSG00000111424	vitamin D receptor	1048	5	TRUE	FALSE	FALSE	TRUE	FALSE	FALSE	FALSE	FALSE	FALSE	FALSE	FALSE	FALSE	Nucleus	1	17	CHEMBL1536	ERGOCALCIFEROL	TRUE	4	FALSE	Reactome	SUMO E3 ligases SUMOylate target proteins	2	8	0	0	0	8	1094
VDR	ENSG00000111424	vitamin D receptor	1048	5	TRUE	FALSE	FALSE	TRUE	FALSE	FALSE	FALSE	FALSE	FALSE	FALSE	FALSE	FALSE	Nucleus	1	17	CHEMBL1042	CHOLECALCIFEROL	TRUE	4	FALSE	Reactome	SUMO E3 ligases SUMOylate target proteins	2	8	0	0	0	8	1094
VDR	ENSG00000111424	vitamin D receptor	1048	5	TRUE	FALSE	FALSE	TRUE	FALSE	FALSE	FALSE	FALSE	FALSE	FALSE	FALSE	FALSE	Nucleus	1	17	CHEMBL1040	CALCIFEDIOL	TRUE	4	FALSE	Reactome	SUMO E3 ligases SUMOylate target proteins	2	8	0	0	0	8	1094
VDR	ENSG00000111424	vitamin D receptor	1048	5	TRUE	FALSE	FALSE	TRUE	FALSE	FALSE	FALSE	FALSE	FALSE	FALSE	FALSE	FALSE	Nucleus	1	17	CHEMBL1601669	ALFACALCIDOL	TRUE	4	FALSE	Reactome	SUMO E3 ligases SUMOylate target proteins	2	8	0	0	0	8	1094
VDR	ENSG00000111424	vitamin D receptor	1048	5	TRUE	FALSE	FALSE	TRUE	FALSE	FALSE	FALSE	FALSE	FALSE	FALSE	FALSE	FALSE	Nucleus	1	17	CHEMBL1042	CHOLECALCIFEROL	TRUE	4	FALSE	Reactome	SUMOylation	2	8	0	0	0	8	1094
VDR	ENSG00000111424	vitamin D receptor	1048	5	TRUE	FALSE	FALSE	TRUE	FALSE	FALSE	FALSE	FALSE	FALSE	FALSE	FALSE	FALSE	Nucleus	1	17	CHEMBL1601669	ALFACALCIDOL	TRUE	4	FALSE	Reactome	SUMOylation	2	8	0	0	0	8	1094
VDR	ENSG00000111424	vitamin D receptor	1048	5	TRUE	FALSE	FALSE	TRUE	FALSE	FALSE	FALSE	FALSE	FALSE	FALSE	FALSE	FALSE	Nucleus	1	17	CHEMBL1042	CHOLECALCIFEROL	TRUE	4	FALSE	Reactome	SUMOylation	2	8	0	0	0	8	1094
VDR	ENSG00000111424	vitamin D receptor	1048	5	TRUE	FALSE	FALSE	TRUE	FALSE	FALSE	FALSE	FALSE	FALSE	FALSE	FALSE	FALSE	Nucleus	1	17	CHEMBL1042	CHOLECALCIFEROL	TRUE	4	FALSE	Reactome	SUMO E3 ligases SUMOylate target proteins	2	8	0	0	0	8	1094
VDR	ENSG00000111424	vitamin D receptor	1048	5	TRUE	FALSE	FALSE	TRUE	FALSE	FALSE	FALSE	FALSE	FALSE	FALSE	FALSE	FALSE	Nucleus	1	17	CHEMBL1042	CHOLECALCIFEROL	TRUE	4	FALSE	Reactome	SUMO E3 ligases SUMOylate target proteins	2	8	0	0	0	8	1094
VDR	ENSG00000111424	vitamin D receptor	1048	5	TRUE	FALSE	FALSE	TRUE	FALSE	FALSE	FALSE	FALSE	FALSE	FALSE	FALSE	FALSE	Nucleus	1	17	CHEMBL1040	CALCIFEDIOL	TRUE	4	FALSE	Reactome	SUMOylation	2	8	0	0	0	8	1094
VDR	ENSG00000111424	vitamin D receptor	1048	5	TRUE	FALSE	FALSE	TRUE	FALSE	FALSE	FALSE	FALSE	FALSE	FALSE	FALSE	FALSE	Nucleus	1	17	CHEMBL3544909	CALCIFEDIOL	TRUE	4	FALSE	Reactome	SUMOylation	2	8	0	0	0	8	1094
VDR	ENSG00000111424	vitamin D receptor	1048	5	TRUE	FALSE	FALSE	TRUE	FALSE	FALSE	FALSE	FALSE	FALSE	FALSE	FALSE	FALSE	Nucleus	1	17	CHEMBL846	CALCITRIOL	TRUE	4	FALSE	Reactome	SUMOylation	2	8	0	0	0	8	1094
VDR	ENSG00000111424	vitamin D receptor	1048	5	TRUE	FALSE	FALSE	TRUE	FALSE	FALSE	FALSE	FALSE	FALSE	FALSE	FALSE	FALSE	Nucleus	1	17	CHEMBL1536	ERGOCALCIFEROL	TRUE	4	FALSE	Reactome	SUMO E3 ligases SUMOylate target proteins	2	8	0	0	0	8	1094
VDR	ENSG00000111424	vitamin D receptor	1048	5	TRUE	FALSE	FALSE	TRUE	FALSE	FALSE	FALSE	FALSE	FALSE	FALSE	FALSE	FALSE	Nucleus	1	17	CHEMBL1200810	DOXERCALCIFEROL	TRUE	4	FALSE	Reactome	SUMO E3 ligases SUMOylate target proteins	2	8	0	0	0	8	1094
VDR	ENSG00000111424	vitamin D receptor	1048	5	TRUE	FALSE	FALSE	TRUE	FALSE	FALSE	FALSE	FALSE	FALSE	FALSE	FALSE	FALSE	Nucleus	1	17	CHEMBL1042	CHOLECALCIFEROL	TRUE	4	FALSE	Reactome	SUMOylation	2	8	0	0	0	8	1094
VDR	ENSG00000111424	vitamin D receptor	1048	5	TRUE	FALSE	FALSE	TRUE	FALSE	FALSE	FALSE	FALSE	FALSE	FALSE	FALSE	FALSE	Nucleus	1	17	CHEMBL1040	CALCIFEDIOL	TRUE	4	FALSE	Reactome	SUMOylation	2	8	0	0	0	8	1094
VDR	ENSG00000111424	vitamin D receptor	1048	5	TRUE	FALSE	FALSE	TRUE	FALSE	FALSE	FALSE	FALSE	FALSE	FALSE	FALSE	FALSE	Nucleus	1	17	CHEMBL846	CALCITRIOL	TRUE	4	FALSE	Reactome	SUMO E3 ligases SUMOylate target proteins	2	8	0	0	0	8	1094
VDR	ENSG00000111424	vitamin D receptor	1048	5	TRUE	FALSE	FALSE	TRUE	FALSE	FALSE	FALSE	FALSE	FALSE	FALSE	FALSE	FALSE	Nucleus	1	17	CHEMBL1536	ERGOCALCIFEROL	TRUE	4	FALSE	Reactome	SUMO E3 ligases SUMOylate target proteins	2	8	0	0	0	8	1094
VDR	ENSG00000111424	vitamin D receptor	1048	5	TRUE	FALSE	FALSE	TRUE	FALSE	FALSE	FALSE	FALSE	FALSE	FALSE	FALSE	FALSE	Nucleus	1	17	CHEMBL1200622	PARICALCITOL	TRUE	4	FALSE	Reactome	SUMOylation	2	8	0	0	0	8	1094
VDR	ENSG00000111424	vitamin D receptor	1048	5	TRUE	FALSE	FALSE	TRUE	FALSE	FALSE	FALSE	FALSE	FALSE	FALSE	FALSE	FALSE	Nucleus	1	17	CHEMBL1040	CALCIFEDIOL	TRUE	4	FALSE	Reactome	SUMOylation	2	8	0	0	0	8	1094
VDR	ENSG00000111424	vitamin D receptor	1048	5	TRUE	FALSE	FALSE	TRUE	FALSE	FALSE	FALSE	FALSE	FALSE	FALSE	FALSE	FALSE	Nucleus	1	17	CHEMBL1042	CHOLECALCIFEROL	TRUE	4	FALSE	Reactome	SUMOylation	2	8	0	0	0	8	1094
VDR	ENSG00000111424	vitamin D receptor	1048	5	TRUE	FALSE	FALSE	TRUE	FALSE	FALSE	FALSE	FALSE	FALSE	FALSE	FALSE	FALSE	Nucleus	1	17	CHEMBL846	CALCITRIOL	TRUE	4	FALSE	Reactome	SUMOylation	2	8	0	0	0	8	1094
VDR	ENSG00000111424	vitamin D receptor	1048	5	TRUE	FALSE	FALSE	TRUE	FALSE	FALSE	FALSE	FALSE	FALSE	FALSE	FALSE	FALSE	Nucleus	1	17	CHEMBL1040	CALCIFEDIOL	TRUE	4	FALSE	Reactome	SUMO E3 ligases SUMOylate target proteins	2	8	0	0	0	8	1094
VDR	ENSG00000111424	vitamin D receptor	1048	5	TRUE	FALSE	FALSE	TRUE	FALSE	FALSE	FALSE	FALSE	FALSE	FALSE	FALSE	FALSE	Nucleus	1	17	CHEMBL1536	ERGOCALCIFEROL	TRUE	4	FALSE	Reactome	SUMOylation	2	8	0	0	0	8	1094
VDR	ENSG00000111424	vitamin D receptor	1048	5	TRUE	FALSE	FALSE	TRUE	FALSE	FALSE	FALSE	FALSE	FALSE	FALSE	FALSE	FALSE	Nucleus	1	17	CHEMBL1042	CHOLECALCIFEROL	TRUE	4	FALSE	Reactome	SUMO E3 ligases SUMOylate target proteins	2	8	0	0	0	8	1094
VDR	ENSG00000111424	vitamin D receptor	1048	5	TRUE	FALSE	FALSE	TRUE	FALSE	FALSE	FALSE	FALSE	FALSE	FALSE	FALSE	FALSE	Nucleus	1	17	CHEMBL1536	ERGOCALCIFEROL	TRUE	4	FALSE	Reactome	SUMO E3 ligases SUMOylate target proteins	2	8	0	0	0	8	1094
VDR	ENSG00000111424	vitamin D receptor	1048	5	TRUE	FALSE	FALSE	TRUE	FALSE	FALSE	FALSE	FALSE	FALSE	FALSE	FALSE	FALSE	Nucleus	1	17	CHEMBL1042	CHOLECALCIFEROL	TRUE	4	FALSE	Reactome	SUMOylation	2	8	0	0	0	8	1094
VDR	ENSG00000111424	vitamin D receptor	1048	5	TRUE	FALSE	FALSE	TRUE	FALSE	FALSE	FALSE	FALSE	FALSE	FALSE	FALSE	FALSE	Nucleus	1	17	CHEMBL1042	CHOLECALCIFEROL	TRUE	4	FALSE	Reactome	SUMO E3 ligases SUMOylate target proteins	2	8	0	0	0	8	1094
VDR	ENSG00000111424	vitamin D receptor	1048	5	TRUE	FALSE	FALSE	TRUE	FALSE	FALSE	FALSE	FALSE	FALSE	FALSE	FALSE	FALSE	Nucleus	1	17	CHEMBL1200810	DOXERCALCIFEROL	TRUE	4	FALSE	Reactome	SUMOylation	2	8	0	0	0	8	1094
VDR	ENSG00000111424	vitamin D receptor	1048	5	TRUE	FALSE	FALSE	TRUE	FALSE	FALSE	FALSE	FALSE	FALSE	FALSE	FALSE	FALSE	Nucleus	1	17	CHEMBL1042	CHOLECALCIFEROL	TRUE	4	FALSE	Reactome	SUMO E3 ligases SUMOylate target proteins	2	8	0	0	0	8	1094
VDR	ENSG00000111424	vitamin D receptor	1048	5	TRUE	FALSE	FALSE	TRUE	FALSE	FALSE	FALSE	FALSE	FALSE	FALSE	FALSE	FALSE	Nucleus	1	17	CHEMBL1042	CHOLECALCIFEROL	TRUE	4	FALSE	Reactome	SUMOylation	2	8	0	0	0	8	1094
VDR	ENSG00000111424	vitamin D receptor	1048	5	TRUE	FALSE	FALSE	TRUE	FALSE	FALSE	FALSE	FALSE	FALSE	FALSE	FALSE	FALSE	Nucleus	1	17	CHEMBL1040	CALCIFEDIOL	TRUE	4	FALSE	Reactome	SUMO E3 ligases SUMOylate target proteins	2	8	0	0	0	8	1094
VDR	ENSG00000111424	vitamin D receptor	1048	5	TRUE	FALSE	FALSE	TRUE	FALSE	FALSE	FALSE	FALSE	FALSE	FALSE	FALSE	FALSE	Nucleus	1	17	CHEMBL1042	CHOLECALCIFEROL	TRUE	4	FALSE	Reactome	SUMO E3 ligases SUMOylate target proteins	2	8	0	0	0	8	1094
VDR	ENSG00000111424	vitamin D receptor	1048	5	TRUE	FALSE	FALSE	TRUE	FALSE	FALSE	FALSE	FALSE	FALSE	FALSE	FALSE	FALSE	Nucleus	1	17	CHEMBL1200666	CALCIPOTRIENE	TRUE	4	FALSE	Reactome	SUMOylation	2	8	0	0	0	8	1094
VDR	ENSG00000111424	vitamin D receptor	1048	5	TRUE	FALSE	FALSE	TRUE	FALSE	FALSE	FALSE	FALSE	FALSE	FALSE	FALSE	FALSE	Nucleus	1	17	CHEMBL1042	CHOLECALCIFEROL	TRUE	4	FALSE	Reactome	SUMOylation	2	8	0	0	0	8	1094
VDR	ENSG00000111424	vitamin D receptor	1048	5	TRUE	FALSE	FALSE	TRUE	FALSE	FALSE	FALSE	FALSE	FALSE	FALSE	FALSE	FALSE	Nucleus	1	17	CHEMBL1042	CHOLECALCIFEROL	TRUE	4	FALSE	Reactome	SUMOylation	2	8	0	0	0	8	1094
SOD1	ENSG00000142168	superoxide dismutase 1	1088	2	FALSE	FALSE	FALSE	FALSE	FALSE	FALSE	FALSE	FALSE	FALSE	FALSE	FALSE	FALSE	Cytoplasm	0	1	CHEMBL3833346	TOFERSEN	FALSE	3	FALSE	Reactome	Cytokine Signaling in Immune system	1	0	1	0	0	0	1093.5
SOD1	ENSG00000142168	superoxide dismutase 1	1088	2	FALSE	FALSE	FALSE	FALSE	FALSE	FALSE	FALSE	FALSE	FALSE	FALSE	FALSE	FALSE	Cytoplasm	0	1	CHEMBL3833346	TOFERSEN	FALSE	3	FALSE	Reactome	Cytokine Signaling in Immune system	1	0	1	0	0	0	1093.5
SOD1	ENSG00000142168	superoxide dismutase 1	1088	2	FALSE	FALSE	FALSE	FALSE	FALSE	FALSE	FALSE	FALSE	FALSE	FALSE	FALSE	FALSE	Cytoplasm	0	1	CHEMBL3833346	TOFERSEN	FALSE	3	FALSE	Reactome	Cytokine Signaling in Immune system	1	0	1	0	0	0	1093.5
FN1	ENSG00000115414	fibronectin 1	1035	4	FALSE	FALSE	FALSE	FALSE	FALSE	TRUE	FALSE	FALSE	FALSE	TRUE	FALSE	FALSE	Secreted	0	5	CHEMBL2109413	AS-1409	FALSE	1	FALSE	Reactome	Cytokine Signaling in Immune system	1	1	1	2	1	1	1052
FN1	ENSG00000115414	fibronectin 1	1035	4	FALSE	FALSE	FALSE	FALSE	FALSE	TRUE	FALSE	FALSE	FALSE	TRUE	FALSE	FALSE	Secreted	0	5	CHEMBL2109589	L19TNFA	FALSE	2	FALSE	Reactome	Cytokine Signaling in Immune system	1	1	1	2	1	1	1052
FN1	ENSG00000115414	fibronectin 1	1035	4	FALSE	FALSE	FALSE	FALSE	FALSE	TRUE	FALSE	FALSE	FALSE	TRUE	FALSE	FALSE	Secreted	0	5	CHEMBL2109608	L19IL2	FALSE	3	FALSE	Reactome	Cytokine Signaling in Immune system	1	1	1	2	1	1	1052
FN1	ENSG00000115414	fibronectin 1	1035	4	FALSE	FALSE	FALSE	FALSE	FALSE	TRUE	FALSE	FALSE	FALSE	TRUE	FALSE	FALSE	Secreted	0	5	CHEMBL2095222	OCRIPLASMIN	TRUE	4	FALSE	Reactome	Cytokine Signaling in Immune system	1	1	1	2	1	1	1052
FN1	ENSG00000115414	fibronectin 1	1035	4	FALSE	FALSE	FALSE	FALSE	FALSE	TRUE	FALSE	FALSE	FALSE	TRUE	FALSE	FALSE	Secreted	0	5	CHEMBL2109608	L19IL2	FALSE	3	FALSE	Reactome	Cytokine Signaling in Immune system	1	1	1	2	1	1	1052
FN1	ENSG00000115414	fibronectin 1	1035	4	FALSE	FALSE	FALSE	FALSE	FALSE	TRUE	FALSE	FALSE	FALSE	TRUE	FALSE	FALSE	Secreted	0	5	CHEMBL2095222	OCRIPLASMIN	TRUE	4	FALSE	Reactome	Cytokine Signaling in Immune system	1	1	1	2	1	1	1052
FN1	ENSG00000115414	fibronectin 1	1035	4	FALSE	FALSE	FALSE	FALSE	FALSE	TRUE	FALSE	FALSE	FALSE	TRUE	FALSE	FALSE	Secreted	0	5	CHEMBL2095222	OCRIPLASMIN	TRUE	4	FALSE	Reactome	Cytokine Signaling in Immune system	1	1	1	2	1	1	1052
FN1	ENSG00000115414	fibronectin 1	1035	4	FALSE	FALSE	FALSE	FALSE	FALSE	TRUE	FALSE	FALSE	FALSE	TRUE	FALSE	FALSE	Secreted	0	5	CHEMBL2095222	OCRIPLASMIN	TRUE	4	FALSE	Reactome	Cytokine Signaling in Immune system	1	1	1	2	1	1	1052
FN1	ENSG00000115414	fibronectin 1	1035	4	FALSE	FALSE	FALSE	FALSE	FALSE	TRUE	FALSE	FALSE	FALSE	TRUE	FALSE	FALSE	Secreted	0	5	CHEMBL2095222	OCRIPLASMIN	TRUE	4	FALSE	Reactome	Cytokine Signaling in Immune system	1	1	1	2	1	1	1052
FN1	ENSG00000115414	fibronectin 1	1035	4	FALSE	FALSE	FALSE	FALSE	FALSE	TRUE	FALSE	FALSE	FALSE	TRUE	FALSE	FALSE	Secreted	0	5	CHEMBL2109608	L19IL2	FALSE	3	FALSE	Reactome	Cytokine Signaling in Immune system	1	1	1	2	1	1	1052
FN1	ENSG00000115414	fibronectin 1	1035	4	FALSE	FALSE	FALSE	FALSE	FALSE	TRUE	FALSE	FALSE	FALSE	TRUE	FALSE	FALSE	Secreted	0	5	CHEMBL2095222	OCRIPLASMIN	TRUE	4	FALSE	Reactome	Cytokine Signaling in Immune system	1	1	1	2	1	1	1052
FN1	ENSG00000115414	fibronectin 1	1035	4	FALSE	FALSE	FALSE	FALSE	FALSE	TRUE	FALSE	FALSE	FALSE	TRUE	FALSE	FALSE	Secreted	0	5	CHEMBL2109608	L19IL2	FALSE	3	FALSE	Reactome	Cytokine Signaling in Immune system	1	1	1	2	1	1	1052
FN1	ENSG00000115414	fibronectin 1	1035	4	FALSE	FALSE	FALSE	FALSE	FALSE	TRUE	FALSE	FALSE	FALSE	TRUE	FALSE	FALSE	Secreted	0	5	CHEMBL2095222	OCRIPLASMIN	TRUE	4	FALSE	Reactome	Cytokine Signaling in Immune system	1	1	1	2	1	1	1052
FN1	ENSG00000115414	fibronectin 1	1035	4	FALSE	FALSE	FALSE	FALSE	FALSE	TRUE	FALSE	FALSE	FALSE	TRUE	FALSE	FALSE	Secreted	0	5	CHEMBL2095222	OCRIPLASMIN	TRUE	4	FALSE	Reactome	Cytokine Signaling in Immune system	1	1	1	2	1	1	1052
FN1	ENSG00000115414	fibronectin 1	1035	4	FALSE	FALSE	FALSE	FALSE	FALSE	TRUE	FALSE	FALSE	FALSE	TRUE	FALSE	FALSE	Secreted	0	5	CHEMBL2109608	L19IL2	FALSE	3	FALSE	Reactome	Cytokine Signaling in Immune system	1	1	1	2	1	1	1052
FN1	ENSG00000115414	fibronectin 1	1035	4	FALSE	FALSE	FALSE	FALSE	FALSE	TRUE	FALSE	FALSE	FALSE	TRUE	FALSE	FALSE	Secreted	0	5	CHEMBL2109608	L19IL2	FALSE	3	FALSE	Reactome	Cytokine Signaling in Immune system	1	1	1	2	1	1	1052
FN1	ENSG00000115414	fibronectin 1	1035	4	FALSE	FALSE	FALSE	FALSE	FALSE	TRUE	FALSE	FALSE	FALSE	TRUE	FALSE	FALSE	Secreted	0	5	CHEMBL2109412	L19SIP 131I	FALSE	2	FALSE	Reactome	Cytokine Signaling in Immune system	1	1	1	2	1	1	1052
FN1	ENSG00000115414	fibronectin 1	1035	4	FALSE	FALSE	FALSE	FALSE	FALSE	TRUE	FALSE	FALSE	FALSE	TRUE	FALSE	FALSE	Secreted	0	5	CHEMBL2109412	L19SIP 131I	FALSE	2	FALSE	Reactome	Cytokine Signaling in Immune system	1	1	1	2	1	1	1052
FN1	ENSG00000115414	fibronectin 1	1035	4	FALSE	FALSE	FALSE	FALSE	FALSE	TRUE	FALSE	FALSE	FALSE	TRUE	FALSE	FALSE	Secreted	0	5	CHEMBL2109413	AS-1409	FALSE	1	FALSE	Reactome	Cytokine Signaling in Immune system	1	1	1	2	1	1	1052
FN1	ENSG00000115414	fibronectin 1	1035	4	FALSE	FALSE	FALSE	FALSE	FALSE	TRUE	FALSE	FALSE	FALSE	TRUE	FALSE	FALSE	Secreted	0	5	CHEMBL2109589	L19TNFA	FALSE	2	FALSE	Reactome	Cytokine Signaling in Immune system	1	1	1	2	1	1	1052
FN1	ENSG00000115414	fibronectin 1	1035	4	FALSE	FALSE	FALSE	FALSE	FALSE	TRUE	FALSE	FALSE	FALSE	TRUE	FALSE	FALSE	Secreted	0	5	CHEMBL2095222	OCRIPLASMIN	TRUE	4	FALSE	Reactome	Cytokine Signaling in Immune system	1	1	1	2	1	1	1052
PIK3CA	ENSG00000121879	phosphatidylinositol-4,5-bisphosphate 3-kinase catalytic subunit alpha	1000	5	TRUE	FALSE	FALSE	TRUE	FALSE	FALSE	FALSE	FALSE	FALSE	FALSE	FALSE	FALSE	Cytosol	2	32	CHEMBL2396661	ALPELISIB	TRUE	4	FALSE	KEGG	HIF-1 signaling pathway	2	3	3	3	0	3	1051.5
PIK3CA	ENSG00000121879	phosphatidylinositol-4,5-bisphosphate 3-kinase catalytic subunit alpha	1000	5	TRUE	FALSE	FALSE	TRUE	FALSE	FALSE	FALSE	FALSE	FALSE	FALSE	FALSE	FALSE	Cytosol	2	32	CHEMBL2396661	ALPELISIB	TRUE	4	FALSE	Reactome	Cytokine Signaling in Immune system	2	3	3	3	0	3	1051.5
PIK3CA	ENSG00000121879	phosphatidylinositol-4,5-bisphosphate 3-kinase catalytic subunit alpha	1000	5	TRUE	FALSE	FALSE	TRUE	FALSE	FALSE	FALSE	FALSE	FALSE	FALSE	FALSE	FALSE	Cytosol	2	32	CHEMBL2396661	ALPELISIB	TRUE	4	FALSE	KEGG	HIF-1 signaling pathway	2	3	3	3	0	3	1051.5
PIK3CA	ENSG00000121879	phosphatidylinositol-4,5-bisphosphate 3-kinase catalytic subunit alpha	1000	5	TRUE	FALSE	FALSE	TRUE	FALSE	FALSE	FALSE	FALSE	FALSE	FALSE	FALSE	FALSE	Cytosol	2	32	CHEMBL592445	GEDATOLISIB	FALSE	2	FALSE	KEGG	HIF-1 signaling pathway	2	3	3	3	0	3	1051.5
PIK3CA	ENSG00000121879	phosphatidylinositol-4,5-bisphosphate 3-kinase catalytic subunit alpha	1000	5	TRUE	FALSE	FALSE	TRUE	FALSE	FALSE	FALSE	FALSE	FALSE	FALSE	FALSE	FALSE	Cytosol	2	32	CHEMBL2017974	BUPARLISIB	FALSE	3	FALSE	KEGG	HIF-1 signaling pathway	2	3	3	3	0	3	1051.5
PIK3CA	ENSG00000121879	phosphatidylinositol-4,5-bisphosphate 3-kinase catalytic subunit alpha	1000	5	TRUE	FALSE	FALSE	TRUE	FALSE	FALSE	FALSE	FALSE	FALSE	FALSE	FALSE	FALSE	Cytosol	2	32	CHEMBL3218576	COPANLISIB	TRUE	4	FALSE	KEGG	HIF-1 signaling pathway	2	3	3	3	0	3	1051.5
PIK3CA	ENSG00000121879	phosphatidylinositol-4,5-bisphosphate 3-kinase catalytic subunit alpha	1000	5	TRUE	FALSE	FALSE	TRUE	FALSE	FALSE	FALSE	FALSE	FALSE	FALSE	FALSE	FALSE	Cytosol	2	32	CHEMBL2396661	ALPELISIB	TRUE	4	FALSE	Reactome	Cytokine Signaling in Immune system	2	3	3	3	0	3	1051.5
PIK3CA	ENSG00000121879	phosphatidylinositol-4,5-bisphosphate 3-kinase catalytic subunit alpha	1000	5	TRUE	FALSE	FALSE	TRUE	FALSE	FALSE	FALSE	FALSE	FALSE	FALSE	FALSE	FALSE	Cytosol	2	32	CHEMBL2387080	TASELISIB	FALSE	3	FALSE	KEGG	HIF-1 signaling pathway	2	3	3	3	0	3	1051.5
PIK3CA	ENSG00000121879	phosphatidylinositol-4,5-bisphosphate 3-kinase catalytic subunit alpha	1000	5	TRUE	FALSE	FALSE	TRUE	FALSE	FALSE	FALSE	FALSE	FALSE	FALSE	FALSE	FALSE	Cytosol	2	32	CHEMBL3545068	COPANLISIB HYDROCHLORIDE	TRUE	4	FALSE	Reactome	Cytokine Signaling in Immune system	2	3	3	3	0	3	1051.5
PIK3CA	ENSG00000121879	phosphatidylinositol-4,5-bisphosphate 3-kinase catalytic subunit alpha	1000	5	TRUE	FALSE	FALSE	TRUE	FALSE	FALSE	FALSE	FALSE	FALSE	FALSE	FALSE	FALSE	Cytosol	2	32	CHEMBL2017974	BUPARLISIB	FALSE	3	FALSE	Reactome	Cytokine Signaling in Immune system	2	3	3	3	0	3	1051.5
PIK3CA	ENSG00000121879	phosphatidylinositol-4,5-bisphosphate 3-kinase catalytic subunit alpha	1000	5	TRUE	FALSE	FALSE	TRUE	FALSE	FALSE	FALSE	FALSE	FALSE	FALSE	FALSE	FALSE	Cytosol	2	32	CHEMBL2396661	ALPELISIB	TRUE	4	FALSE	Reactome	Cytokine Signaling in Immune system	2	3	3	3	0	3	1051.5
PIK3CA	ENSG00000121879	phosphatidylinositol-4,5-bisphosphate 3-kinase catalytic subunit alpha	1000	5	TRUE	FALSE	FALSE	TRUE	FALSE	FALSE	FALSE	FALSE	FALSE	FALSE	FALSE	FALSE	Cytosol	2	32	CHEMBL3935857	SERABELISIB	FALSE	2	FALSE	KEGG	HIF-1 signaling pathway	2	3	3	3	0	3	1051.5
PIK3CA	ENSG00000121879	phosphatidylinositol-4,5-bisphosphate 3-kinase catalytic subunit alpha	1000	5	TRUE	FALSE	FALSE	TRUE	FALSE	FALSE	FALSE	FALSE	FALSE	FALSE	FALSE	FALSE	Cytosol	2	32	CHEMBL2396661	ALPELISIB	TRUE	4	FALSE	KEGG	HIF-1 signaling pathway	2	3	3	3	0	3	1051.5
PIK3CA	ENSG00000121879	phosphatidylinositol-4,5-bisphosphate 3-kinase catalytic subunit alpha	1000	5	TRUE	FALSE	FALSE	TRUE	FALSE	FALSE	FALSE	FALSE	FALSE	FALSE	FALSE	FALSE	Cytosol	2	32	CHEMBL2017974	BUPARLISIB	FALSE	3	FALSE	KEGG	HIF-1 signaling pathway	2	3	3	3	0	3	1051.5
PIK3CA	ENSG00000121879	phosphatidylinositol-4,5-bisphosphate 3-kinase catalytic subunit alpha	1000	5	TRUE	FALSE	FALSE	TRUE	FALSE	FALSE	FALSE	FALSE	FALSE	FALSE	FALSE	FALSE	Cytosol	2	32	CHEMBL2396661	ALPELISIB	TRUE	4	FALSE	KEGG	HIF-1 signaling pathway	2	3	3	3	0	3	1051.5
PIK3CA	ENSG00000121879	phosphatidylinositol-4,5-bisphosphate 3-kinase catalytic subunit alpha	1000	5	TRUE	FALSE	FALSE	TRUE	FALSE	FALSE	FALSE	FALSE	FALSE	FALSE	FALSE	FALSE	Cytosol	2	32	CHEMBL2396661	ALPELISIB	TRUE	4	FALSE	Reactome	Cytokine Signaling in Immune system	2	3	3	3	0	3	1051.5
PIK3CA	ENSG00000121879	phosphatidylinositol-4,5-bisphosphate 3-kinase catalytic subunit alpha	1000	5	TRUE	FALSE	FALSE	TRUE	FALSE	FALSE	FALSE	FALSE	FALSE	FALSE	FALSE	FALSE	Cytosol	2	32	CHEMBL2017974	BUPARLISIB	FALSE	3	FALSE	KEGG	HIF-1 signaling pathway	2	3	3	3	0	3	1051.5
PIK3CA	ENSG00000121879	phosphatidylinositol-4,5-bisphosphate 3-kinase catalytic subunit alpha	1000	5	TRUE	FALSE	FALSE	TRUE	FALSE	FALSE	FALSE	FALSE	FALSE	FALSE	FALSE	FALSE	Cytosol	2	32	CHEMBL3813842	PAXALISIB	FALSE	2	FALSE	KEGG	HIF-1 signaling pathway	2	3	3	3	0	3	1051.5
PIK3CA	ENSG00000121879	phosphatidylinositol-4,5-bisphosphate 3-kinase catalytic subunit alpha	1000	5	TRUE	FALSE	FALSE	TRUE	FALSE	FALSE	FALSE	FALSE	FALSE	FALSE	FALSE	FALSE	Cytosol	2	32	CHEMBL3935857	SERABELISIB	FALSE	2	FALSE	Reactome	Cytokine Signaling in Immune system	2	3	3	3	0	3	1051.5
PIK3CA	ENSG00000121879	phosphatidylinositol-4,5-bisphosphate 3-kinase catalytic subunit alpha	1000	5	TRUE	FALSE	FALSE	TRUE	FALSE	FALSE	FALSE	FALSE	FALSE	FALSE	FALSE	FALSE	Cytosol	2	32	CHEMBL3545068	COPANLISIB HYDROCHLORIDE	TRUE	4	FALSE	Reactome	Cytokine Signaling in Immune system	2	3	3	3	0	3	1051.5
PIK3CA	ENSG00000121879	phosphatidylinositol-4,5-bisphosphate 3-kinase catalytic subunit alpha	1000	5	TRUE	FALSE	FALSE	TRUE	FALSE	FALSE	FALSE	FALSE	FALSE	FALSE	FALSE	FALSE	Cytosol	2	32	CHEMBL3218576	COPANLISIB	TRUE	4	FALSE	Reactome	Cytokine Signaling in Immune system	2	3	3	3	0	3	1051.5
PIK3CA	ENSG00000121879	phosphatidylinositol-4,5-bisphosphate 3-kinase catalytic subunit alpha	1000	5	TRUE	FALSE	FALSE	TRUE	FALSE	FALSE	FALSE	FALSE	FALSE	FALSE	FALSE	FALSE	Cytosol	2	32	CHEMBL3218576	COPANLISIB	TRUE	4	FALSE	Reactome	Cytokine Signaling in Immune system	2	3	3	3	0	3	1051.5
PIK3CA	ENSG00000121879	phosphatidylinositol-4,5-bisphosphate 3-kinase catalytic subunit alpha	1000	5	TRUE	FALSE	FALSE	TRUE	FALSE	FALSE	FALSE	FALSE	FALSE	FALSE	FALSE	FALSE	Cytosol	2	32	CHEMBL2396661	ALPELISIB	TRUE	4	FALSE	Reactome	Cytokine Signaling in Immune system	2	3	3	3	0	3	1051.5
PIK3CA	ENSG00000121879	phosphatidylinositol-4,5-bisphosphate 3-kinase catalytic subunit alpha	1000	5	TRUE	FALSE	FALSE	TRUE	FALSE	FALSE	FALSE	FALSE	FALSE	FALSE	FALSE	FALSE	Cytosol	2	32	CHEMBL1879463	DACTOLISIB	FALSE	3	FALSE	KEGG	HIF-1 signaling pathway	2	3	3	3	0	3	1051.5
PIK3CA	ENSG00000121879	phosphatidylinositol-4,5-bisphosphate 3-kinase catalytic subunit alpha	1000	5	TRUE	FALSE	FALSE	TRUE	FALSE	FALSE	FALSE	FALSE	FALSE	FALSE	FALSE	FALSE	Cytosol	2	32	CHEMBL2017974	BUPARLISIB	FALSE	3	FALSE	Reactome	Cytokine Signaling in Immune system	2	3	3	3	0	3	1051.5
PIK3CA	ENSG00000121879	phosphatidylinositol-4,5-bisphosphate 3-kinase catalytic subunit alpha	1000	5	TRUE	FALSE	FALSE	TRUE	FALSE	FALSE	FALSE	FALSE	FALSE	FALSE	FALSE	FALSE	Cytosol	2	32	CHEMBL3218576	COPANLISIB	TRUE	4	FALSE	Reactome	Cytokine Signaling in Immune system	2	3	3	3	0	3	1051.5
PIK3CA	ENSG00000121879	phosphatidylinositol-4,5-bisphosphate 3-kinase catalytic subunit alpha	1000	5	TRUE	FALSE	FALSE	TRUE	FALSE	FALSE	FALSE	FALSE	FALSE	FALSE	FALSE	FALSE	Cytosol	2	32	CHEMBL2396661	ALPELISIB	TRUE	4	FALSE	Reactome	Cytokine Signaling in Immune system	2	3	3	3	0	3	1051.5
PIK3CA	ENSG00000121879	phosphatidylinositol-4,5-bisphosphate 3-kinase catalytic subunit alpha	1000	5	TRUE	FALSE	FALSE	TRUE	FALSE	FALSE	FALSE	FALSE	FALSE	FALSE	FALSE	FALSE	Cytosol	2	32	CHEMBL3218576	COPANLISIB	TRUE	4	FALSE	KEGG	HIF-1 signaling pathway	2	3	3	3	0	3	1051.5
PIK3CA	ENSG00000121879	phosphatidylinositol-4,5-bisphosphate 3-kinase catalytic subunit alpha	1000	5	TRUE	FALSE	FALSE	TRUE	FALSE	FALSE	FALSE	FALSE	FALSE	FALSE	FALSE	FALSE	Cytosol	2	32	CHEMBL3218576	COPANLISIB	TRUE	4	FALSE	Reactome	Cytokine Signaling in Immune system	2	3	3	3	0	3	1051.5
PIK3CA	ENSG00000121879	phosphatidylinositol-4,5-bisphosphate 3-kinase catalytic subunit alpha	1000	5	TRUE	FALSE	FALSE	TRUE	FALSE	FALSE	FALSE	FALSE	FALSE	FALSE	FALSE	FALSE	Cytosol	2	32	CHEMBL3545068	COPANLISIB HYDROCHLORIDE	TRUE	4	FALSE	KEGG	HIF-1 signaling pathway	2	3	3	3	0	3	1051.5
PIK3CA	ENSG00000121879	phosphatidylinositol-4,5-bisphosphate 3-kinase catalytic subunit alpha	1000	5	TRUE	FALSE	FALSE	TRUE	FALSE	FALSE	FALSE	FALSE	FALSE	FALSE	FALSE	FALSE	Cytosol	2	32	CHEMBL3813842	PAXALISIB	FALSE	2	FALSE	Reactome	Cytokine Signaling in Immune system	2	3	3	3	0	3	1051.5
PIK3CA	ENSG00000121879	phosphatidylinositol-4,5-bisphosphate 3-kinase catalytic subunit alpha	1000	5	TRUE	FALSE	FALSE	TRUE	FALSE	FALSE	FALSE	FALSE	FALSE	FALSE	FALSE	FALSE	Cytosol	2	32	CHEMBL2017974	BUPARLISIB	FALSE	3	FALSE	KEGG	HIF-1 signaling pathway	2	3	3	3	0	3	1051.5
PIK3CA	ENSG00000121879	phosphatidylinositol-4,5-bisphosphate 3-kinase catalytic subunit alpha	1000	5	TRUE	FALSE	FALSE	TRUE	FALSE	FALSE	FALSE	FALSE	FALSE	FALSE	FALSE	FALSE	Cytosol	2	32	CHEMBL2017974	BUPARLISIB	FALSE	3	FALSE	Reactome	Cytokine Signaling in Immune system	2	3	3	3	0	3	1051.5
PIK3CA	ENSG00000121879	phosphatidylinositol-4,5-bisphosphate 3-kinase catalytic subunit alpha	1000	5	TRUE	FALSE	FALSE	TRUE	FALSE	FALSE	FALSE	FALSE	FALSE	FALSE	FALSE	FALSE	Cytosol	2	32	CHEMBL2396661	ALPELISIB	TRUE	4	FALSE	KEGG	HIF-1 signaling pathway	2	3	3	3	0	3	1051.5
PIK3CA	ENSG00000121879	phosphatidylinositol-4,5-bisphosphate 3-kinase catalytic subunit alpha	1000	5	TRUE	FALSE	FALSE	TRUE	FALSE	FALSE	FALSE	FALSE	FALSE	FALSE	FALSE	FALSE	Cytosol	2	32	CHEMBL1879463	DACTOLISIB	FALSE	3	FALSE	Reactome	Cytokine Signaling in Immune system	2	3	3	3	0	3	1051.5
PIK3CA	ENSG00000121879	phosphatidylinositol-4,5-bisphosphate 3-kinase catalytic subunit alpha	1000	5	TRUE	FALSE	FALSE	TRUE	FALSE	FALSE	FALSE	FALSE	FALSE	FALSE	FALSE	FALSE	Cytosol	2	32	CHEMBL3218576	COPANLISIB	TRUE	4	FALSE	KEGG	HIF-1 signaling pathway	2	3	3	3	0	3	1051.5
PIK3CA	ENSG00000121879	phosphatidylinositol-4,5-bisphosphate 3-kinase catalytic subunit alpha	1000	5	TRUE	FALSE	FALSE	TRUE	FALSE	FALSE	FALSE	FALSE	FALSE	FALSE	FALSE	FALSE	Cytosol	2	32	CHEMBL2396661	ALPELISIB	TRUE	4	FALSE	Reactome	Cytokine Signaling in Immune system	2	3	3	3	0	3	1051.5
PIK3CA	ENSG00000121879	phosphatidylinositol-4,5-bisphosphate 3-kinase catalytic subunit alpha	1000	5	TRUE	FALSE	FALSE	TRUE	FALSE	FALSE	FALSE	FALSE	FALSE	FALSE	FALSE	FALSE	Cytosol	2	32	CHEMBL2387080	TASELISIB	FALSE	3	FALSE	Reactome	Cytokine Signaling in Immune system	2	3	3	3	0	3	1051.5
PIK3CA	ENSG00000121879	phosphatidylinositol-4,5-bisphosphate 3-kinase catalytic subunit alpha	1000	5	TRUE	FALSE	FALSE	TRUE	FALSE	FALSE	FALSE	FALSE	FALSE	FALSE	FALSE	FALSE	Cytosol	2	32	CHEMBL2396661	ALPELISIB	TRUE	4	FALSE	Reactome	Cytokine Signaling in Immune system	2	3	3	3	0	3	1051.5
PIK3CA	ENSG00000121879	phosphatidylinositol-4,5-bisphosphate 3-kinase catalytic subunit alpha	1000	5	TRUE	FALSE	FALSE	TRUE	FALSE	FALSE	FALSE	FALSE	FALSE	FALSE	FALSE	FALSE	Cytosol	2	32	CHEMBL3218576	COPANLISIB	TRUE	4	FALSE	KEGG	HIF-1 signaling pathway	2	3	3	3	0	3	1051.5
PIK3CA	ENSG00000121879	phosphatidylinositol-4,5-bisphosphate 3-kinase catalytic subunit alpha	1000	5	TRUE	FALSE	FALSE	TRUE	FALSE	FALSE	FALSE	FALSE	FALSE	FALSE	FALSE	FALSE	Cytosol	2	32	CHEMBL3218576	COPANLISIB	TRUE	4	FALSE	Reactome	Cytokine Signaling in Immune system	2	3	3	3	0	3	1051.5
PIK3CA	ENSG00000121879	phosphatidylinositol-4,5-bisphosphate 3-kinase catalytic subunit alpha	1000	5	TRUE	FALSE	FALSE	TRUE	FALSE	FALSE	FALSE	FALSE	FALSE	FALSE	FALSE	FALSE	Cytosol	2	32	CHEMBL3218576	COPANLISIB	TRUE	4	FALSE	KEGG	HIF-1 signaling pathway	2	3	3	3	0	3	1051.5
PIK3CA	ENSG00000121879	phosphatidylinositol-4,5-bisphosphate 3-kinase catalytic subunit alpha	1000	5	TRUE	FALSE	FALSE	TRUE	FALSE	FALSE	FALSE	FALSE	FALSE	FALSE	FALSE	FALSE	Cytosol	2	32	CHEMBL2396661	ALPELISIB	TRUE	4	FALSE	KEGG	HIF-1 signaling pathway	2	3	3	3	0	3	1051.5
PIK3CA	ENSG00000121879	phosphatidylinositol-4,5-bisphosphate 3-kinase catalytic subunit alpha	1000	5	TRUE	FALSE	FALSE	TRUE	FALSE	FALSE	FALSE	FALSE	FALSE	FALSE	FALSE	FALSE	Cytosol	2	32	CHEMBL2396661	ALPELISIB	TRUE	4	FALSE	KEGG	HIF-1 signaling pathway	2	3	3	3	0	3	1051.5
PIK3CA	ENSG00000121879	phosphatidylinositol-4,5-bisphosphate 3-kinase catalytic subunit alpha	1000	5	TRUE	FALSE	FALSE	TRUE	FALSE	FALSE	FALSE	FALSE	FALSE	FALSE	FALSE	FALSE	Cytosol	2	32	CHEMBL2017974	BUPARLISIB	FALSE	3	FALSE	Reactome	Cytokine Signaling in Immune system	2	3	3	3	0	3	1051.5
PIK3CA	ENSG00000121879	phosphatidylinositol-4,5-bisphosphate 3-kinase catalytic subunit alpha	1000	5	TRUE	FALSE	FALSE	TRUE	FALSE	FALSE	FALSE	FALSE	FALSE	FALSE	FALSE	FALSE	Cytosol	2	32	CHEMBL2396661	ALPELISIB	TRUE	4	FALSE	KEGG	HIF-1 signaling pathway	2	3	3	3	0	3	1051.5
PIK3CA	ENSG00000121879	phosphatidylinositol-4,5-bisphosphate 3-kinase catalytic subunit alpha	1000	5	TRUE	FALSE	FALSE	TRUE	FALSE	FALSE	FALSE	FALSE	FALSE	FALSE	FALSE	FALSE	Cytosol	2	32	CHEMBL3545068	COPANLISIB HYDROCHLORIDE	TRUE	4	FALSE	KEGG	HIF-1 signaling pathway	2	3	3	3	0	3	1051.5
PIK3CA	ENSG00000121879	phosphatidylinositol-4,5-bisphosphate 3-kinase catalytic subunit alpha	1000	5	TRUE	FALSE	FALSE	TRUE	FALSE	FALSE	FALSE	FALSE	FALSE	FALSE	FALSE	FALSE	Cytosol	2	32	CHEMBL2396661	ALPELISIB	TRUE	4	FALSE	Reactome	Cytokine Signaling in Immune system	2	3	3	3	0	3	1051.5
PIK3CA	ENSG00000121879	phosphatidylinositol-4,5-bisphosphate 3-kinase catalytic subunit alpha	1000	5	TRUE	FALSE	FALSE	TRUE	FALSE	FALSE	FALSE	FALSE	FALSE	FALSE	FALSE	FALSE	Cytosol	2	32	CHEMBL2396661	ALPELISIB	TRUE	4	FALSE	KEGG	HIF-1 signaling pathway	2	3	3	3	0	3	1051.5
PIK3CA	ENSG00000121879	phosphatidylinositol-4,5-bisphosphate 3-kinase catalytic subunit alpha	1000	5	TRUE	FALSE	FALSE	TRUE	FALSE	FALSE	FALSE	FALSE	FALSE	FALSE	FALSE	FALSE	Cytosol	2	32	CHEMBL592445	GEDATOLISIB	FALSE	2	FALSE	Reactome	Cytokine Signaling in Immune system	2	3	3	3	0	3	1051.5
JAK2	ENSG00000096968	Janus kinase 2	983	5	TRUE	FALSE	FALSE	TRUE	FALSE	FALSE	FALSE	FALSE	FALSE	FALSE	FALSE	FALSE	Endomembrane system	2	23	CHEMBL1789941	RUXOLITINIB	TRUE	4	FALSE	Reactome	Cytokine Signaling in Immune system	3	8	0	0	0	8	1034
JAK2	ENSG00000096968	Janus kinase 2	983	5	TRUE	FALSE	FALSE	TRUE	FALSE	FALSE	FALSE	FALSE	FALSE	FALSE	FALSE	FALSE	Endomembrane system	2	23	CHEMBL2103743	TOFACITINIB CITRATE	TRUE	4	FALSE	Reactome	Cytokine Signaling in Immune system	3	8	0	0	0	8	1034
JAK2	ENSG00000096968	Janus kinase 2	983	5	TRUE	FALSE	FALSE	TRUE	FALSE	FALSE	FALSE	FALSE	FALSE	FALSE	FALSE	FALSE	Endomembrane system	2	23	CHEMBL1789941	RUXOLITINIB	TRUE	4	FALSE	Reactome	Mitotic G1-G1/S phases	3	8	0	0	0	8	1034
JAK2	ENSG00000096968	Janus kinase 2	983	5	TRUE	FALSE	FALSE	TRUE	FALSE	FALSE	FALSE	FALSE	FALSE	FALSE	FALSE	FALSE	Endomembrane system	2	23	CHEMBL2103743	TOFACITINIB CITRATE	TRUE	4	FALSE	Reactome	Interferon Signaling	3	8	0	0	0	8	1034
JAK2	ENSG00000096968	Janus kinase 2	983	5	TRUE	FALSE	FALSE	TRUE	FALSE	FALSE	FALSE	FALSE	FALSE	FALSE	FALSE	FALSE	Endomembrane system	2	23	CHEMBL1287853	FEDRATINIB	TRUE	4	FALSE	Reactome	Interferon Signaling	3	8	0	0	0	8	1034
JAK2	ENSG00000096968	Janus kinase 2	983	5	TRUE	FALSE	FALSE	TRUE	FALSE	FALSE	FALSE	FALSE	FALSE	FALSE	FALSE	FALSE	Endomembrane system	2	23	CHEMBL1795071	RUXOLITINIB PHOSPHATE	TRUE	4	FALSE	Reactome	Interferon Signaling	3	8	0	0	0	8	1034
JAK2	ENSG00000096968	Janus kinase 2	983	5	TRUE	FALSE	FALSE	TRUE	FALSE	FALSE	FALSE	FALSE	FALSE	FALSE	FALSE	FALSE	Endomembrane system	2	23	CHEMBL4297216	FEDRATINIB HYDROCHLORIDE	TRUE	4	FALSE	Reactome	Interferon Signaling	3	8	0	0	0	8	1034
JAK2	ENSG00000096968	Janus kinase 2	983	5	TRUE	FALSE	FALSE	TRUE	FALSE	FALSE	FALSE	FALSE	FALSE	FALSE	FALSE	FALSE	Endomembrane system	2	23	CHEMBL1287853	FEDRATINIB	TRUE	4	FALSE	Reactome	Cytokine Signaling in Immune system	3	8	0	0	0	8	1034
JAK2	ENSG00000096968	Janus kinase 2	983	5	TRUE	FALSE	FALSE	TRUE	FALSE	FALSE	FALSE	FALSE	FALSE	FALSE	FALSE	FALSE	Endomembrane system	2	23	CHEMBL1789941	RUXOLITINIB	TRUE	4	FALSE	Reactome	Cytokine Signaling in Immune system	3	8	0	0	0	8	1034
JAK2	ENSG00000096968	Janus kinase 2	983	5	TRUE	FALSE	FALSE	TRUE	FALSE	FALSE	FALSE	FALSE	FALSE	FALSE	FALSE	FALSE	Endomembrane system	2	23	CHEMBL2105759	BARICITINIB	TRUE	4	FALSE	Reactome	Interferon Signaling	3	8	0	0	0	8	1034
JAK2	ENSG00000096968	Janus kinase 2	983	5	TRUE	FALSE	FALSE	TRUE	FALSE	FALSE	FALSE	FALSE	FALSE	FALSE	FALSE	FALSE	Endomembrane system	2	23	CHEMBL3622821	UPADACITINIB	TRUE	4	FALSE	Reactome	Mitotic G1-G1/S phases	3	8	0	0	0	8	1034
JAK2	ENSG00000096968	Janus kinase 2	983	5	TRUE	FALSE	FALSE	TRUE	FALSE	FALSE	FALSE	FALSE	FALSE	FALSE	FALSE	FALSE	Endomembrane system	2	23	CHEMBL1789941	RUXOLITINIB	TRUE	4	FALSE	Reactome	Mitotic G1-G1/S phases	3	8	0	0	0	8	1034
JAK2	ENSG00000096968	Janus kinase 2	983	5	TRUE	FALSE	FALSE	TRUE	FALSE	FALSE	FALSE	FALSE	FALSE	FALSE	FALSE	FALSE	Endomembrane system	2	23	CHEMBL3622821	UPADACITINIB	TRUE	4	FALSE	Reactome	Cytokine Signaling in Immune system	3	8	0	0	0	8	1034
JAK2	ENSG00000096968	Janus kinase 2	983	5	TRUE	FALSE	FALSE	TRUE	FALSE	FALSE	FALSE	FALSE	FALSE	FALSE	FALSE	FALSE	Endomembrane system	2	23	CHEMBL1287853	FEDRATINIB	TRUE	4	FALSE	Reactome	Mitotic G1-G1/S phases	3	8	0	0	0	8	1034
JAK2	ENSG00000096968	Janus kinase 2	983	5	TRUE	FALSE	FALSE	TRUE	FALSE	FALSE	FALSE	FALSE	FALSE	FALSE	FALSE	FALSE	Endomembrane system	2	23	CHEMBL221959	TOFACITINIB	TRUE	4	FALSE	Reactome	Interferon Signaling	3	8	0	0	0	8	1034
JAK2	ENSG00000096968	Janus kinase 2	983	5	TRUE	FALSE	FALSE	TRUE	FALSE	FALSE	FALSE	FALSE	FALSE	FALSE	FALSE	FALSE	Endomembrane system	2	23	CHEMBL2105759	BARICITINIB	TRUE	4	FALSE	Reactome	Mitotic G1-G1/S phases	3	8	0	0	0	8	1034
JAK2	ENSG00000096968	Janus kinase 2	983	5	TRUE	FALSE	FALSE	TRUE	FALSE	FALSE	FALSE	FALSE	FALSE	FALSE	FALSE	FALSE	Endomembrane system	2	23	CHEMBL3622821	UPADACITINIB	TRUE	4	FALSE	Reactome	Cytokine Signaling in Immune system	3	8	0	0	0	8	1034
JAK2	ENSG00000096968	Janus kinase 2	983	5	TRUE	FALSE	FALSE	TRUE	FALSE	FALSE	FALSE	FALSE	FALSE	FALSE	FALSE	FALSE	Endomembrane system	2	23	CHEMBL221959	TOFACITINIB	TRUE	4	FALSE	Reactome	Interferon Signaling	3	8	0	0	0	8	1034
JAK2	ENSG00000096968	Janus kinase 2	983	5	TRUE	FALSE	FALSE	TRUE	FALSE	FALSE	FALSE	FALSE	FALSE	FALSE	FALSE	FALSE	Endomembrane system	2	23	CHEMBL221959	TOFACITINIB	TRUE	4	FALSE	Reactome	Mitotic G1-G1/S phases	3	8	0	0	0	8	1034
JAK2	ENSG00000096968	Janus kinase 2	983	5	TRUE	FALSE	FALSE	TRUE	FALSE	FALSE	FALSE	FALSE	FALSE	FALSE	FALSE	FALSE	Endomembrane system	2	23	CHEMBL1789941	RUXOLITINIB	TRUE	4	FALSE	Reactome	Cytokine Signaling in Immune system	3	8	0	0	0	8	1034
JAK2	ENSG00000096968	Janus kinase 2	983	5	TRUE	FALSE	FALSE	TRUE	FALSE	FALSE	FALSE	FALSE	FALSE	FALSE	FALSE	FALSE	Endomembrane system	2	23	CHEMBL2103743	TOFACITINIB CITRATE	TRUE	4	FALSE	Reactome	Mitotic G1-G1/S phases	3	8	0	0	0	8	1034
JAK2	ENSG00000096968	Janus kinase 2	983	5	TRUE	FALSE	FALSE	TRUE	FALSE	FALSE	FALSE	FALSE	FALSE	FALSE	FALSE	FALSE	Endomembrane system	2	23	CHEMBL1287853	FEDRATINIB	TRUE	4	FALSE	Reactome	Mitotic G1-G1/S phases	3	8	0	0	0	8	1034
JAK2	ENSG00000096968	Janus kinase 2	983	5	TRUE	FALSE	FALSE	TRUE	FALSE	FALSE	FALSE	FALSE	FALSE	FALSE	FALSE	FALSE	Endomembrane system	2	23	CHEMBL221959	TOFACITINIB	TRUE	4	FALSE	Reactome	Interferon Signaling	3	8	0	0	0	8	1034
JAK2	ENSG00000096968	Janus kinase 2	983	5	TRUE	FALSE	FALSE	TRUE	FALSE	FALSE	FALSE	FALSE	FALSE	FALSE	FALSE	FALSE	Endomembrane system	2	23	CHEMBL2103743	TOFACITINIB CITRATE	TRUE	4	FALSE	Reactome	Mitotic G1-G1/S phases	3	8	0	0	0	8	1034
JAK2	ENSG00000096968	Janus kinase 2	983	5	TRUE	FALSE	FALSE	TRUE	FALSE	FALSE	FALSE	FALSE	FALSE	FALSE	FALSE	FALSE	Endomembrane system	2	23	CHEMBL1789941	RUXOLITINIB	TRUE	4	FALSE	Reactome	Interferon Signaling	3	8	0	0	0	8	1034
JAK2	ENSG00000096968	Janus kinase 2	983	5	TRUE	FALSE	FALSE	TRUE	FALSE	FALSE	FALSE	FALSE	FALSE	FALSE	FALSE	FALSE	Endomembrane system	2	23	CHEMBL221959	TOFACITINIB	TRUE	4	FALSE	Reactome	Cytokine Signaling in Immune system	3	8	0	0	0	8	1034
JAK2	ENSG00000096968	Janus kinase 2	983	5	TRUE	FALSE	FALSE	TRUE	FALSE	FALSE	FALSE	FALSE	FALSE	FALSE	FALSE	FALSE	Endomembrane system	2	23	CHEMBL1287853	FEDRATINIB	TRUE	4	FALSE	Reactome	Mitotic G1-G1/S phases	3	8	0	0	0	8	1034
JAK2	ENSG00000096968	Janus kinase 2	983	5	TRUE	FALSE	FALSE	TRUE	FALSE	FALSE	FALSE	FALSE	FALSE	FALSE	FALSE	FALSE	Endomembrane system	2	23	CHEMBL1789941	RUXOLITINIB	TRUE	4	FALSE	Reactome	Interferon Signaling	3	8	0	0	0	8	1034
JAK2	ENSG00000096968	Janus kinase 2	983	5	TRUE	FALSE	FALSE	TRUE	FALSE	FALSE	FALSE	FALSE	FALSE	FALSE	FALSE	FALSE	Endomembrane system	2	23	CHEMBL221959	TOFACITINIB	TRUE	4	FALSE	Reactome	Mitotic G1-G1/S phases	3	8	0	0	0	8	1034
JAK2	ENSG00000096968	Janus kinase 2	983	5	TRUE	FALSE	FALSE	TRUE	FALSE	FALSE	FALSE	FALSE	FALSE	FALSE	FALSE	FALSE	Endomembrane system	2	23	CHEMBL1789941	RUXOLITINIB	TRUE	4	FALSE	Reactome	Mitotic G1-G1/S phases	3	8	0	0	0	8	1034
JAK2	ENSG00000096968	Janus kinase 2	983	5	TRUE	FALSE	FALSE	TRUE	FALSE	FALSE	FALSE	FALSE	FALSE	FALSE	FALSE	FALSE	Endomembrane system	2	23	CHEMBL1789941	RUXOLITINIB	TRUE	4	FALSE	Reactome	Mitotic G1-G1/S phases	3	8	0	0	0	8	1034
JAK2	ENSG00000096968	Janus kinase 2	983	5	TRUE	FALSE	FALSE	TRUE	FALSE	FALSE	FALSE	FALSE	FALSE	FALSE	FALSE	FALSE	Endomembrane system	2	23	CHEMBL4297216	FEDRATINIB HYDROCHLORIDE	TRUE	4	FALSE	Reactome	Mitotic G1-G1/S phases	3	8	0	0	0	8	1034
JAK2	ENSG00000096968	Janus kinase 2	983	5	TRUE	FALSE	FALSE	TRUE	FALSE	FALSE	FALSE	FALSE	FALSE	FALSE	FALSE	FALSE	Endomembrane system	2	23	CHEMBL221959	TOFACITINIB	TRUE	4	FALSE	Reactome	Cytokine Signaling in Immune system	3	8	0	0	0	8	1034
JAK2	ENSG00000096968	Janus kinase 2	983	5	TRUE	FALSE	FALSE	TRUE	FALSE	FALSE	FALSE	FALSE	FALSE	FALSE	FALSE	FALSE	Endomembrane system	2	23	CHEMBL221959	TOFACITINIB	TRUE	4	FALSE	Reactome	Interferon Signaling	3	8	0	0	0	8	1034
JAK2	ENSG00000096968	Janus kinase 2	983	5	TRUE	FALSE	FALSE	TRUE	FALSE	FALSE	FALSE	FALSE	FALSE	FALSE	FALSE	FALSE	Endomembrane system	2	23	CHEMBL221959	TOFACITINIB	TRUE	4	FALSE	Reactome	Cytokine Signaling in Immune system	3	8	0	0	0	8	1034
JAK2	ENSG00000096968	Janus kinase 2	983	5	TRUE	FALSE	FALSE	TRUE	FALSE	FALSE	FALSE	FALSE	FALSE	FALSE	FALSE	FALSE	Endomembrane system	2	23	CHEMBL3622821	UPADACITINIB	TRUE	4	FALSE	Reactome	Interferon Signaling	3	8	0	0	0	8	1034
JAK2	ENSG00000096968	Janus kinase 2	983	5	TRUE	FALSE	FALSE	TRUE	FALSE	FALSE	FALSE	FALSE	FALSE	FALSE	FALSE	FALSE	Endomembrane system	2	23	CHEMBL1789941	RUXOLITINIB	TRUE	4	FALSE	Reactome	Mitotic G1-G1/S phases	3	8	0	0	0	8	1034
JAK2	ENSG00000096968	Janus kinase 2	983	5	TRUE	FALSE	FALSE	TRUE	FALSE	FALSE	FALSE	FALSE	FALSE	FALSE	FALSE	FALSE	Endomembrane system	2	23	CHEMBL1795071	RUXOLITINIB PHOSPHATE	TRUE	4	FALSE	Reactome	Mitotic G1-G1/S phases	3	8	0	0	0	8	1034
JAK2	ENSG00000096968	Janus kinase 2	983	5	TRUE	FALSE	FALSE	TRUE	FALSE	FALSE	FALSE	FALSE	FALSE	FALSE	FALSE	FALSE	Endomembrane system	2	23	CHEMBL221959	TOFACITINIB	TRUE	4	FALSE	Reactome	Mitotic G1-G1/S phases	3	8	0	0	0	8	1034
JAK2	ENSG00000096968	Janus kinase 2	983	5	TRUE	FALSE	FALSE	TRUE	FALSE	FALSE	FALSE	FALSE	FALSE	FALSE	FALSE	FALSE	Endomembrane system	2	23	CHEMBL1789941	RUXOLITINIB	TRUE	4	FALSE	Reactome	Interferon Signaling	3	8	0	0	0	8	1034
JAK2	ENSG00000096968	Janus kinase 2	983	5	TRUE	FALSE	FALSE	TRUE	FALSE	FALSE	FALSE	FALSE	FALSE	FALSE	FALSE	FALSE	Endomembrane system	2	23	CHEMBL1789941	RUXOLITINIB	TRUE	4	FALSE	Reactome	Cytokine Signaling in Immune system	3	8	0	0	0	8	1034
JAK2	ENSG00000096968	Janus kinase 2	983	5	TRUE	FALSE	FALSE	TRUE	FALSE	FALSE	FALSE	FALSE	FALSE	FALSE	FALSE	FALSE	Endomembrane system	2	23	CHEMBL1789941	RUXOLITINIB	TRUE	4	FALSE	Reactome	Interferon Signaling	3	8	0	0	0	8	1034
JAK2	ENSG00000096968	Janus kinase 2	983	5	TRUE	FALSE	FALSE	TRUE	FALSE	FALSE	FALSE	FALSE	FALSE	FALSE	FALSE	FALSE	Endomembrane system	2	23	CHEMBL1789941	RUXOLITINIB	TRUE	4	FALSE	Reactome	Mitotic G1-G1/S phases	3	8	0	0	0	8	1034
JAK2	ENSG00000096968	Janus kinase 2	983	5	TRUE	FALSE	FALSE	TRUE	FALSE	FALSE	FALSE	FALSE	FALSE	FALSE	FALSE	FALSE	Endomembrane system	2	23	CHEMBL1287853	FEDRATINIB	TRUE	4	FALSE	Reactome	Interferon Signaling	3	8	0	0	0	8	1034
JAK2	ENSG00000096968	Janus kinase 2	983	5	TRUE	FALSE	FALSE	TRUE	FALSE	FALSE	FALSE	FALSE	FALSE	FALSE	FALSE	FALSE	Endomembrane system	2	23	CHEMBL1789941	RUXOLITINIB	TRUE	4	FALSE	Reactome	Cytokine Signaling in Immune system	3	8	0	0	0	8	1034
JAK2	ENSG00000096968	Janus kinase 2	983	5	TRUE	FALSE	FALSE	TRUE	FALSE	FALSE	FALSE	FALSE	FALSE	FALSE	FALSE	FALSE	Endomembrane system	2	23	CHEMBL221959	TOFACITINIB	TRUE	4	FALSE	Reactome	Cytokine Signaling in Immune system	3	8	0	0	0	8	1034
JAK2	ENSG00000096968	Janus kinase 2	983	5	TRUE	FALSE	FALSE	TRUE	FALSE	FALSE	FALSE	FALSE	FALSE	FALSE	FALSE	FALSE	Endomembrane system	2	23	CHEMBL1287853	FEDRATINIB	TRUE	4	FALSE	Reactome	Cytokine Signaling in Immune system	3	8	0	0	0	8	1034
JAK2	ENSG00000096968	Janus kinase 2	983	5	TRUE	FALSE	FALSE	TRUE	FALSE	FALSE	FALSE	FALSE	FALSE	FALSE	FALSE	FALSE	Endomembrane system	2	23	CHEMBL1287853	FEDRATINIB	TRUE	4	FALSE	Reactome	Interferon Signaling	3	8	0	0	0	8	1034
JAK2	ENSG00000096968	Janus kinase 2	983	5	TRUE	FALSE	FALSE	TRUE	FALSE	FALSE	FALSE	FALSE	FALSE	FALSE	FALSE	FALSE	Endomembrane system	2	23	CHEMBL221959	TOFACITINIB	TRUE	4	FALSE	Reactome	Interferon Signaling	3	8	0	0	0	8	1034
JAK2	ENSG00000096968	Janus kinase 2	983	5	TRUE	FALSE	FALSE	TRUE	FALSE	FALSE	FALSE	FALSE	FALSE	FALSE	FALSE	FALSE	Endomembrane system	2	23	CHEMBL221959	TOFACITINIB	TRUE	4	FALSE	Reactome	Mitotic G1-G1/S phases	3	8	0	0	0	8	1034
JAK2	ENSG00000096968	Janus kinase 2	983	5	TRUE	FALSE	FALSE	TRUE	FALSE	FALSE	FALSE	FALSE	FALSE	FALSE	FALSE	FALSE	Endomembrane system	2	23	CHEMBL4297216	FEDRATINIB HYDROCHLORIDE	TRUE	4	FALSE	Reactome	Cytokine Signaling in Immune system	3	8	0	0	0	8	1034
JAK2	ENSG00000096968	Janus kinase 2	983	5	TRUE	FALSE	FALSE	TRUE	FALSE	FALSE	FALSE	FALSE	FALSE	FALSE	FALSE	FALSE	Endomembrane system	2	23	CHEMBL1789941	RUXOLITINIB	TRUE	4	FALSE	Reactome	Interferon Signaling	3	8	0	0	0	8	1034
JAK2	ENSG00000096968	Janus kinase 2	983	5	TRUE	FALSE	FALSE	TRUE	FALSE	FALSE	FALSE	FALSE	FALSE	FALSE	FALSE	FALSE	Endomembrane system	2	23	CHEMBL221959	TOFACITINIB	TRUE	4	FALSE	Reactome	Interferon Signaling	3	8	0	0	0	8	1034
JAK2	ENSG00000096968	Janus kinase 2	983	5	TRUE	FALSE	FALSE	TRUE	FALSE	FALSE	FALSE	FALSE	FALSE	FALSE	FALSE	FALSE	Endomembrane system	2	23	CHEMBL1789941	RUXOLITINIB	TRUE	4	FALSE	Reactome	Interferon Signaling	3	8	0	0	0	8	1034
JAK2	ENSG00000096968	Janus kinase 2	983	5	TRUE	FALSE	FALSE	TRUE	FALSE	FALSE	FALSE	FALSE	FALSE	FALSE	FALSE	FALSE	Endomembrane system	2	23	CHEMBL221959	TOFACITINIB	TRUE	4	FALSE	Reactome	Mitotic G1-G1/S phases	3	8	0	0	0	8	1034
JAK2	ENSG00000096968	Janus kinase 2	983	5	TRUE	FALSE	FALSE	TRUE	FALSE	FALSE	FALSE	FALSE	FALSE	FALSE	FALSE	FALSE	Endomembrane system	2	23	CHEMBL1789941	RUXOLITINIB	TRUE	4	FALSE	Reactome	Interferon Signaling	3	8	0	0	0	8	1034
JAK2	ENSG00000096968	Janus kinase 2	983	5	TRUE	FALSE	FALSE	TRUE	FALSE	FALSE	FALSE	FALSE	FALSE	FALSE	FALSE	FALSE	Endomembrane system	2	23	CHEMBL3622821	UPADACITINIB	TRUE	4	FALSE	Reactome	Interferon Signaling	3	8	0	0	0	8	1034
JAK2	ENSG00000096968	Janus kinase 2	983	5	TRUE	FALSE	FALSE	TRUE	FALSE	FALSE	FALSE	FALSE	FALSE	FALSE	FALSE	FALSE	Endomembrane system	2	23	CHEMBL221959	TOFACITINIB	TRUE	4	FALSE	Reactome	Mitotic G1-G1/S phases	3	8	0	0	0	8	1034
JAK2	ENSG00000096968	Janus kinase 2	983	5	TRUE	FALSE	FALSE	TRUE	FALSE	FALSE	FALSE	FALSE	FALSE	FALSE	FALSE	FALSE	Endomembrane system	2	23	CHEMBL1789941	RUXOLITINIB	TRUE	4	FALSE	Reactome	Cytokine Signaling in Immune system	3	8	0	0	0	8	1034
JAK2	ENSG00000096968	Janus kinase 2	983	5	TRUE	FALSE	FALSE	TRUE	FALSE	FALSE	FALSE	FALSE	FALSE	FALSE	FALSE	FALSE	Endomembrane system	2	23	CHEMBL2105759	BARICITINIB	TRUE	4	FALSE	Reactome	Cytokine Signaling in Immune system	3	8	0	0	0	8	1034
JAK2	ENSG00000096968	Janus kinase 2	983	5	TRUE	FALSE	FALSE	TRUE	FALSE	FALSE	FALSE	FALSE	FALSE	FALSE	FALSE	FALSE	Endomembrane system	2	23	CHEMBL1287853	FEDRATINIB	TRUE	4	FALSE	Reactome	Cytokine Signaling in Immune system	3	8	0	0	0	8	1034
JAK2	ENSG00000096968	Janus kinase 2	983	5	TRUE	FALSE	FALSE	TRUE	FALSE	FALSE	FALSE	FALSE	FALSE	FALSE	FALSE	FALSE	Endomembrane system	2	23	CHEMBL2103743	TOFACITINIB CITRATE	TRUE	4	FALSE	Reactome	Cytokine Signaling in Immune system	3	8	0	0	0	8	1034
JAK2	ENSG00000096968	Janus kinase 2	983	5	TRUE	FALSE	FALSE	TRUE	FALSE	FALSE	FALSE	FALSE	FALSE	FALSE	FALSE	FALSE	Endomembrane system	2	23	CHEMBL2103743	TOFACITINIB CITRATE	TRUE	4	FALSE	Reactome	Mitotic G1-G1/S phases	3	8	0	0	0	8	1034
JAK2	ENSG00000096968	Janus kinase 2	983	5	TRUE	FALSE	FALSE	TRUE	FALSE	FALSE	FALSE	FALSE	FALSE	FALSE	FALSE	FALSE	Endomembrane system	2	23	CHEMBL1795071	RUXOLITINIB PHOSPHATE	TRUE	4	FALSE	Reactome	Cytokine Signaling in Immune system	3	8	0	0	0	8	1034
JAK2	ENSG00000096968	Janus kinase 2	983	5	TRUE	FALSE	FALSE	TRUE	FALSE	FALSE	FALSE	FALSE	FALSE	FALSE	FALSE	FALSE	Endomembrane system	2	23	CHEMBL221959	TOFACITINIB	TRUE	4	FALSE	Reactome	Cytokine Signaling in Immune system	3	8	0	0	0	8	1034
JAK2	ENSG00000096968	Janus kinase 2	983	5	TRUE	FALSE	FALSE	TRUE	FALSE	FALSE	FALSE	FALSE	FALSE	FALSE	FALSE	FALSE	Endomembrane system	2	23	CHEMBL2103743	TOFACITINIB CITRATE	TRUE	4	FALSE	Reactome	Cytokine Signaling in Immune system	3	8	0	0	0	8	1034
JAK2	ENSG00000096968	Janus kinase 2	983	5	TRUE	FALSE	FALSE	TRUE	FALSE	FALSE	FALSE	FALSE	FALSE	FALSE	FALSE	FALSE	Endomembrane system	2	23	CHEMBL2103743	TOFACITINIB CITRATE	TRUE	4	FALSE	Reactome	Interferon Signaling	3	8	0	0	0	8	1034
JAK2	ENSG00000096968	Janus kinase 2	983	5	TRUE	FALSE	FALSE	TRUE	FALSE	FALSE	FALSE	FALSE	FALSE	FALSE	FALSE	FALSE	Endomembrane system	2	23	CHEMBL221959	TOFACITINIB	TRUE	4	FALSE	Reactome	Mitotic G1-G1/S phases	3	8	0	0	0	8	1034
JAK2	ENSG00000096968	Janus kinase 2	983	5	TRUE	FALSE	FALSE	TRUE	FALSE	FALSE	FALSE	FALSE	FALSE	FALSE	FALSE	FALSE	Endomembrane system	2	23	CHEMBL2103743	TOFACITINIB CITRATE	TRUE	4	FALSE	Reactome	Interferon Signaling	3	8	0	0	0	8	1034
JAK2	ENSG00000096968	Janus kinase 2	983	5	TRUE	FALSE	FALSE	TRUE	FALSE	FALSE	FALSE	FALSE	FALSE	FALSE	FALSE	FALSE	Endomembrane system	2	23	CHEMBL1789941	RUXOLITINIB	TRUE	4	FALSE	Reactome	Mitotic G1-G1/S phases	3	8	0	0	0	8	1034
JAK2	ENSG00000096968	Janus kinase 2	983	5	TRUE	FALSE	FALSE	TRUE	FALSE	FALSE	FALSE	FALSE	FALSE	FALSE	FALSE	FALSE	Endomembrane system	2	23	CHEMBL221959	TOFACITINIB	TRUE	4	FALSE	Reactome	Interferon Signaling	3	8	0	0	0	8	1034
JAK2	ENSG00000096968	Janus kinase 2	983	5	TRUE	FALSE	FALSE	TRUE	FALSE	FALSE	FALSE	FALSE	FALSE	FALSE	FALSE	FALSE	Endomembrane system	2	23	CHEMBL1789941	RUXOLITINIB	TRUE	4	FALSE	Reactome	Cytokine Signaling in Immune system	3	8	0	0	0	8	1034
JAK2	ENSG00000096968	Janus kinase 2	983	5	TRUE	FALSE	FALSE	TRUE	FALSE	FALSE	FALSE	FALSE	FALSE	FALSE	FALSE	FALSE	Endomembrane system	2	23	CHEMBL221959	TOFACITINIB	TRUE	4	FALSE	Reactome	Cytokine Signaling in Immune system	3	8	0	0	0	8	1034
JAK2	ENSG00000096968	Janus kinase 2	983	5	TRUE	FALSE	FALSE	TRUE	FALSE	FALSE	FALSE	FALSE	FALSE	FALSE	FALSE	FALSE	Endomembrane system	2	23	CHEMBL3622821	UPADACITINIB	TRUE	4	FALSE	Reactome	Mitotic G1-G1/S phases	3	8	0	0	0	8	1034
JAK2	ENSG00000096968	Janus kinase 2	983	5	TRUE	FALSE	FALSE	TRUE	FALSE	FALSE	FALSE	FALSE	FALSE	FALSE	FALSE	FALSE	Endomembrane system	2	23	CHEMBL221959	TOFACITINIB	TRUE	4	FALSE	Reactome	Cytokine Signaling in Immune system	3	8	0	0	0	8	1034
NOS3	ENSG00000164867	nitric oxide synthase 3	1017	5	FALSE	TRUE	FALSE	TRUE	FALSE	FALSE	FALSE	FALSE	FALSE	FALSE	FALSE	FALSE	Cell membrane	0	2	CHEMBL256147	TILARGININE	FALSE	3	FALSE	KEGG	HIF-1 signaling pathway	1	0	2	0	0	0	1028
NOS3	ENSG00000164867	nitric oxide synthase 3	1017	5	FALSE	TRUE	FALSE	TRUE	FALSE	FALSE	FALSE	FALSE	FALSE	FALSE	FALSE	FALSE	Cell membrane	0	2	CHEMBL256147	TILARGININE	FALSE	3	FALSE	KEGG	HIF-1 signaling pathway	1	0	2	0	0	0	1028
NOS3	ENSG00000164867	nitric oxide synthase 3	1017	5	FALSE	TRUE	FALSE	TRUE	FALSE	FALSE	FALSE	FALSE	FALSE	FALSE	FALSE	FALSE	Cell membrane	0	2	CHEMBL256147	TILARGININE	FALSE	3	FALSE	KEGG	HIF-1 signaling pathway	1	0	2	0	0	0	1028
NOS3	ENSG00000164867	nitric oxide synthase 3	1017	5	FALSE	TRUE	FALSE	TRUE	FALSE	FALSE	FALSE	FALSE	FALSE	FALSE	FALSE	FALSE	Cell membrane	0	2	CHEMBL256147	TILARGININE	FALSE	3	FALSE	KEGG	HIF-1 signaling pathway	1	0	2	0	0	0	1028
NOS3	ENSG00000164867	nitric oxide synthase 3	1017	5	FALSE	TRUE	FALSE	TRUE	FALSE	FALSE	FALSE	FALSE	FALSE	FALSE	FALSE	FALSE	Cell membrane	0	2	CHEMBL256147	TILARGININE	FALSE	3	FALSE	KEGG	HIF-1 signaling pathway	1	0	2	0	0	0	1028
NOS3	ENSG00000164867	nitric oxide synthase 3	1017	5	FALSE	TRUE	FALSE	TRUE	FALSE	FALSE	FALSE	FALSE	FALSE	FALSE	FALSE	FALSE	Cell membrane	0	2	CHEMBL256147	TILARGININE	FALSE	3	FALSE	KEGG	HIF-1 signaling pathway	1	0	2	0	0	0	1028
NOS3	ENSG00000164867	nitric oxide synthase 3	1017	5	FALSE	TRUE	FALSE	TRUE	FALSE	FALSE	FALSE	FALSE	FALSE	FALSE	FALSE	FALSE	Cell membrane	0	2	CHEMBL256147	TILARGININE	FALSE	3	FALSE	KEGG	HIF-1 signaling pathway	1	0	2	0	0	0	1028
NOS3	ENSG00000164867	nitric oxide synthase 3	1017	5	FALSE	TRUE	FALSE	TRUE	FALSE	FALSE	FALSE	FALSE	FALSE	FALSE	FALSE	FALSE	Cell membrane	0	2	CHEMBL256147	TILARGININE	FALSE	3	FALSE	KEGG	HIF-1 signaling pathway	1	0	2	0	0	0	1028
NOS3	ENSG00000164867	nitric oxide synthase 3	1017	5	FALSE	TRUE	FALSE	TRUE	FALSE	FALSE	FALSE	FALSE	FALSE	FALSE	FALSE	FALSE	Cell membrane	0	2	CHEMBL256147	TILARGININE	FALSE	3	FALSE	KEGG	HIF-1 signaling pathway	1	0	2	0	0	0	1028
NOS3	ENSG00000164867	nitric oxide synthase 3	1017	5	FALSE	TRUE	FALSE	TRUE	FALSE	FALSE	FALSE	FALSE	FALSE	FALSE	FALSE	FALSE	Cell membrane	0	2	CHEMBL256147	TILARGININE	FALSE	3	FALSE	KEGG	HIF-1 signaling pathway	1	0	2	0	0	0	1028
NOS3	ENSG00000164867	nitric oxide synthase 3	1017	5	FALSE	TRUE	FALSE	TRUE	FALSE	FALSE	FALSE	FALSE	FALSE	FALSE	FALSE	FALSE	Cell membrane	0	2	CHEMBL256147	TILARGININE	FALSE	3	FALSE	KEGG	HIF-1 signaling pathway	1	0	2	0	0	0	1028
NOS3	ENSG00000164867	nitric oxide synthase 3	1017	5	FALSE	TRUE	FALSE	TRUE	FALSE	FALSE	FALSE	FALSE	FALSE	FALSE	FALSE	FALSE	Cell membrane	0	2	CHEMBL1256175	TILARGININE ACETATE	FALSE	3	FALSE	KEGG	HIF-1 signaling pathway	1	0	2	0	0	0	1028
NOS3	ENSG00000164867	nitric oxide synthase 3	1017	5	FALSE	TRUE	FALSE	TRUE	FALSE	FALSE	FALSE	FALSE	FALSE	FALSE	FALSE	FALSE	Cell membrane	0	2	CHEMBL256147	TILARGININE	FALSE	3	FALSE	KEGG	HIF-1 signaling pathway	1	0	2	0	0	0	1028
NOS3	ENSG00000164867	nitric oxide synthase 3	1017	5	FALSE	TRUE	FALSE	TRUE	FALSE	FALSE	FALSE	FALSE	FALSE	FALSE	FALSE	FALSE	Cell membrane	0	2	CHEMBL256147	TILARGININE	FALSE	3	FALSE	KEGG	HIF-1 signaling pathway	1	0	2	0	0	0	1028
NOS3	ENSG00000164867	nitric oxide synthase 3	1017	5	FALSE	TRUE	FALSE	TRUE	FALSE	FALSE	FALSE	FALSE	FALSE	FALSE	FALSE	FALSE	Cell membrane	0	2	CHEMBL256147	TILARGININE	FALSE	3	FALSE	KEGG	HIF-1 signaling pathway	1	0	2	0	0	0	1028
NOS2	ENSG00000007171	nitric oxide synthase 2	1010	5	FALSE	TRUE	FALSE	TRUE	FALSE	FALSE	FALSE	FALSE	FALSE	FALSE	FALSE	FALSE	Cytoplasm	0	3	CHEMBL256147	TILARGININE	FALSE	3	FALSE	Reactome	Cytokine Signaling in Immune system	2	0	2	1	0	0	1024
NOS2	ENSG00000007171	nitric oxide synthase 2	1010	5	FALSE	TRUE	FALSE	TRUE	FALSE	FALSE	FALSE	FALSE	FALSE	FALSE	FALSE	FALSE	Cytoplasm	0	3	CHEMBL256147	TILARGININE	FALSE	3	FALSE	Reactome	Cytokine Signaling in Immune system	2	0	2	1	0	0	1024
NOS2	ENSG00000007171	nitric oxide synthase 2	1010	5	FALSE	TRUE	FALSE	TRUE	FALSE	FALSE	FALSE	FALSE	FALSE	FALSE	FALSE	FALSE	Cytoplasm	0	3	CHEMBL256147	TILARGININE	FALSE	3	FALSE	Reactome	Cytokine Signaling in Immune system	2	0	2	1	0	0	1024
NOS2	ENSG00000007171	nitric oxide synthase 2	1010	5	FALSE	TRUE	FALSE	TRUE	FALSE	FALSE	FALSE	FALSE	FALSE	FALSE	FALSE	FALSE	Cytoplasm	0	3	CHEMBL256147	TILARGININE	FALSE	3	FALSE	Reactome	Cytokine Signaling in Immune system	2	0	2	1	0	0	1024
NOS2	ENSG00000007171	nitric oxide synthase 2	1010	5	FALSE	TRUE	FALSE	TRUE	FALSE	FALSE	FALSE	FALSE	FALSE	FALSE	FALSE	FALSE	Cytoplasm	0	3	CHEMBL1256175	TILARGININE ACETATE	FALSE	3	FALSE	Reactome	Cytokine Signaling in Immune system	2	0	2	1	0	0	1024
NOS2	ENSG00000007171	nitric oxide synthase 2	1010	5	FALSE	TRUE	FALSE	TRUE	FALSE	FALSE	FALSE	FALSE	FALSE	FALSE	FALSE	FALSE	Cytoplasm	0	3	CHEMBL256147	TILARGININE	FALSE	3	FALSE	Reactome	Cytokine Signaling in Immune system	2	0	2	1	0	0	1024
NOS2	ENSG00000007171	nitric oxide synthase 2	1010	5	FALSE	TRUE	FALSE	TRUE	FALSE	FALSE	FALSE	FALSE	FALSE	FALSE	FALSE	FALSE	Cytoplasm	0	3	CHEMBL114551	GW-274150	FALSE	2	FALSE	Reactome	Cytokine Signaling in Immune system	2	0	2	1	0	0	1024
NOS2	ENSG00000007171	nitric oxide synthase 2	1010	5	FALSE	TRUE	FALSE	TRUE	FALSE	FALSE	FALSE	FALSE	FALSE	FALSE	FALSE	FALSE	Cytoplasm	0	3	CHEMBL256147	TILARGININE	FALSE	3	FALSE	Reactome	Cytokine Signaling in Immune system	2	0	2	1	0	0	1024
NOS2	ENSG00000007171	nitric oxide synthase 2	1010	5	FALSE	TRUE	FALSE	TRUE	FALSE	FALSE	FALSE	FALSE	FALSE	FALSE	FALSE	FALSE	Cytoplasm	0	3	CHEMBL256147	TILARGININE	FALSE	3	FALSE	KEGG	HIF-1 signaling pathway	2	0	2	1	0	0	1024
NOS2	ENSG00000007171	nitric oxide synthase 2	1010	5	FALSE	TRUE	FALSE	TRUE	FALSE	FALSE	FALSE	FALSE	FALSE	FALSE	FALSE	FALSE	Cytoplasm	0	3	CHEMBL256147	TILARGININE	FALSE	3	FALSE	Reactome	Cytokine Signaling in Immune system	2	0	2	1	0	0	1024
NOS2	ENSG00000007171	nitric oxide synthase 2	1010	5	FALSE	TRUE	FALSE	TRUE	FALSE	FALSE	FALSE	FALSE	FALSE	FALSE	FALSE	FALSE	Cytoplasm	0	3	CHEMBL256147	TILARGININE	FALSE	3	FALSE	Reactome	Cytokine Signaling in Immune system	2	0	2	1	0	0	1024
NOS2	ENSG00000007171	nitric oxide synthase 2	1010	5	FALSE	TRUE	FALSE	TRUE	FALSE	FALSE	FALSE	FALSE	FALSE	FALSE	FALSE	FALSE	Cytoplasm	0	3	CHEMBL256147	TILARGININE	FALSE	3	FALSE	KEGG	HIF-1 signaling pathway	2	0	2	1	0	0	1024
NOS2	ENSG00000007171	nitric oxide synthase 2	1010	5	FALSE	TRUE	FALSE	TRUE	FALSE	FALSE	FALSE	FALSE	FALSE	FALSE	FALSE	FALSE	Cytoplasm	0	3	CHEMBL256147	TILARGININE	FALSE	3	FALSE	KEGG	HIF-1 signaling pathway	2	0	2	1	0	0	1024
NOS2	ENSG00000007171	nitric oxide synthase 2	1010	5	FALSE	TRUE	FALSE	TRUE	FALSE	FALSE	FALSE	FALSE	FALSE	FALSE	FALSE	FALSE	Cytoplasm	0	3	CHEMBL256147	TILARGININE	FALSE	3	FALSE	Reactome	Cytokine Signaling in Immune system	2	0	2	1	0	0	1024
NOS2	ENSG00000007171	nitric oxide synthase 2	1010	5	FALSE	TRUE	FALSE	TRUE	FALSE	FALSE	FALSE	FALSE	FALSE	FALSE	FALSE	FALSE	Cytoplasm	0	3	CHEMBL256147	TILARGININE	FALSE	3	FALSE	KEGG	HIF-1 signaling pathway	2	0	2	1	0	0	1024
NOS2	ENSG00000007171	nitric oxide synthase 2	1010	5	FALSE	TRUE	FALSE	TRUE	FALSE	FALSE	FALSE	FALSE	FALSE	FALSE	FALSE	FALSE	Cytoplasm	0	3	CHEMBL114551	GW-274150	FALSE	2	FALSE	Reactome	Cytokine Signaling in Immune system	2	0	2	1	0	0	1024
NOS2	ENSG00000007171	nitric oxide synthase 2	1010	5	FALSE	TRUE	FALSE	TRUE	FALSE	FALSE	FALSE	FALSE	FALSE	FALSE	FALSE	FALSE	Cytoplasm	0	3	CHEMBL114551	GW-274150	FALSE	2	FALSE	KEGG	HIF-1 signaling pathway	2	0	2	1	0	0	1024
NOS2	ENSG00000007171	nitric oxide synthase 2	1010	5	FALSE	TRUE	FALSE	TRUE	FALSE	FALSE	FALSE	FALSE	FALSE	FALSE	FALSE	FALSE	Cytoplasm	0	3	CHEMBL256147	TILARGININE	FALSE	3	FALSE	KEGG	HIF-1 signaling pathway	2	0	2	1	0	0	1024
NOS2	ENSG00000007171	nitric oxide synthase 2	1010	5	FALSE	TRUE	FALSE	TRUE	FALSE	FALSE	FALSE	FALSE	FALSE	FALSE	FALSE	FALSE	Cytoplasm	0	3	CHEMBL114551	GW-274150	FALSE	2	FALSE	KEGG	HIF-1 signaling pathway	2	0	2	1	0	0	1024
NOS2	ENSG00000007171	nitric oxide synthase 2	1010	5	FALSE	TRUE	FALSE	TRUE	FALSE	FALSE	FALSE	FALSE	FALSE	FALSE	FALSE	FALSE	Cytoplasm	0	3	CHEMBL256147	TILARGININE	FALSE	3	FALSE	Reactome	Cytokine Signaling in Immune system	2	0	2	1	0	0	1024
NOS2	ENSG00000007171	nitric oxide synthase 2	1010	5	FALSE	TRUE	FALSE	TRUE	FALSE	FALSE	FALSE	FALSE	FALSE	FALSE	FALSE	FALSE	Cytoplasm	0	3	CHEMBL256147	TILARGININE	FALSE	3	FALSE	Reactome	Cytokine Signaling in Immune system	2	0	2	1	0	0	1024
NOS2	ENSG00000007171	nitric oxide synthase 2	1010	5	FALSE	TRUE	FALSE	TRUE	FALSE	FALSE	FALSE	FALSE	FALSE	FALSE	FALSE	FALSE	Cytoplasm	0	3	CHEMBL256147	TILARGININE	FALSE	3	FALSE	KEGG	HIF-1 signaling pathway	2	0	2	1	0	0	1024
NOS2	ENSG00000007171	nitric oxide synthase 2	1010	5	FALSE	TRUE	FALSE	TRUE	FALSE	FALSE	FALSE	FALSE	FALSE	FALSE	FALSE	FALSE	Cytoplasm	0	3	CHEMBL1256175	TILARGININE ACETATE	FALSE	3	FALSE	KEGG	HIF-1 signaling pathway	2	0	2	1	0	0	1024
NOS2	ENSG00000007171	nitric oxide synthase 2	1010	5	FALSE	TRUE	FALSE	TRUE	FALSE	FALSE	FALSE	FALSE	FALSE	FALSE	FALSE	FALSE	Cytoplasm	0	3	CHEMBL256147	TILARGININE	FALSE	3	FALSE	KEGG	HIF-1 signaling pathway	2	0	2	1	0	0	1024
NOS2	ENSG00000007171	nitric oxide synthase 2	1010	5	FALSE	TRUE	FALSE	TRUE	FALSE	FALSE	FALSE	FALSE	FALSE	FALSE	FALSE	FALSE	Cytoplasm	0	3	CHEMBL114551	GW-274150	FALSE	2	FALSE	Reactome	Cytokine Signaling in Immune system	2	0	2	1	0	0	1024
NOS2	ENSG00000007171	nitric oxide synthase 2	1010	5	FALSE	TRUE	FALSE	TRUE	FALSE	FALSE	FALSE	FALSE	FALSE	FALSE	FALSE	FALSE	Cytoplasm	0	3	CHEMBL256147	TILARGININE	FALSE	3	FALSE	KEGG	HIF-1 signaling pathway	2	0	2	1	0	0	1024
NOS2	ENSG00000007171	nitric oxide synthase 2	1010	5	FALSE	TRUE	FALSE	TRUE	FALSE	FALSE	FALSE	FALSE	FALSE	FALSE	FALSE	FALSE	Cytoplasm	0	3	CHEMBL256147	TILARGININE	FALSE	3	FALSE	KEGG	HIF-1 signaling pathway	2	0	2	1	0	0	1024
NOS2	ENSG00000007171	nitric oxide synthase 2	1010	5	FALSE	TRUE	FALSE	TRUE	FALSE	FALSE	FALSE	FALSE	FALSE	FALSE	FALSE	FALSE	Cytoplasm	0	3	CHEMBL256147	TILARGININE	FALSE	3	FALSE	Reactome	Cytokine Signaling in Immune system	2	0	2	1	0	0	1024
NOS2	ENSG00000007171	nitric oxide synthase 2	1010	5	FALSE	TRUE	FALSE	TRUE	FALSE	FALSE	FALSE	FALSE	FALSE	FALSE	FALSE	FALSE	Cytoplasm	0	3	CHEMBL256147	TILARGININE	FALSE	3	FALSE	KEGG	HIF-1 signaling pathway	2	0	2	1	0	0	1024
NOS2	ENSG00000007171	nitric oxide synthase 2	1010	5	FALSE	TRUE	FALSE	TRUE	FALSE	FALSE	FALSE	FALSE	FALSE	FALSE	FALSE	FALSE	Cytoplasm	0	3	CHEMBL256147	TILARGININE	FALSE	3	FALSE	KEGG	HIF-1 signaling pathway	2	0	2	1	0	0	1024
NOS2	ENSG00000007171	nitric oxide synthase 2	1010	5	FALSE	TRUE	FALSE	TRUE	FALSE	FALSE	FALSE	FALSE	FALSE	FALSE	FALSE	FALSE	Cytoplasm	0	3	CHEMBL256147	TILARGININE	FALSE	3	FALSE	KEGG	HIF-1 signaling pathway	2	0	2	1	0	0	1024
NOS2	ENSG00000007171	nitric oxide synthase 2	1010	5	FALSE	TRUE	FALSE	TRUE	FALSE	FALSE	FALSE	FALSE	FALSE	FALSE	FALSE	FALSE	Cytoplasm	0	3	CHEMBL256147	TILARGININE	FALSE	3	FALSE	KEGG	HIF-1 signaling pathway	2	0	2	1	0	0	1024
NOS2	ENSG00000007171	nitric oxide synthase 2	1010	5	FALSE	TRUE	FALSE	TRUE	FALSE	FALSE	FALSE	FALSE	FALSE	FALSE	FALSE	FALSE	Cytoplasm	0	3	CHEMBL256147	TILARGININE	FALSE	3	FALSE	Reactome	Cytokine Signaling in Immune system	2	0	2	1	0	0	1024
NOS2	ENSG00000007171	nitric oxide synthase 2	1010	5	FALSE	TRUE	FALSE	TRUE	FALSE	FALSE	FALSE	FALSE	FALSE	FALSE	FALSE	FALSE	Cytoplasm	0	3	CHEMBL256147	TILARGININE	FALSE	3	FALSE	KEGG	HIF-1 signaling pathway	2	0	2	1	0	0	1024
NOS2	ENSG00000007171	nitric oxide synthase 2	1010	5	FALSE	TRUE	FALSE	TRUE	FALSE	FALSE	FALSE	FALSE	FALSE	FALSE	FALSE	FALSE	Cytoplasm	0	3	CHEMBL114551	GW-274150	FALSE	2	FALSE	KEGG	HIF-1 signaling pathway	2	0	2	1	0	0	1024
NOS2	ENSG00000007171	nitric oxide synthase 2	1010	5	FALSE	TRUE	FALSE	TRUE	FALSE	FALSE	FALSE	FALSE	FALSE	FALSE	FALSE	FALSE	Cytoplasm	0	3	CHEMBL256147	TILARGININE	FALSE	3	FALSE	Reactome	Cytokine Signaling in Immune system	2	0	2	1	0	0	1024
IL18	ENSG00000150782	interleukin 18	1015	2	FALSE	FALSE	FALSE	FALSE	FALSE	TRUE	FALSE	FALSE	FALSE	FALSE	TRUE	FALSE	Cytoplasm	0	3	CHEMBL2109606	GSK-1070806	FALSE	2	FALSE	Reactome	Cytokine Signaling in Immune system	1	0	1	1	1	0	1024
IL18	ENSG00000150782	interleukin 18	1015	2	FALSE	FALSE	FALSE	FALSE	FALSE	TRUE	FALSE	FALSE	FALSE	FALSE	TRUE	FALSE	Cytoplasm	0	3	CHEMBL2109604	MEDI-2338	FALSE	1	FALSE	Reactome	Cytokine Signaling in Immune system	1	0	1	1	1	0	1024
IL18	ENSG00000150782	interleukin 18	1015	2	FALSE	FALSE	FALSE	FALSE	FALSE	TRUE	FALSE	FALSE	FALSE	FALSE	TRUE	FALSE	Cytoplasm	0	3	CHEMBL2109604	MEDI-2338	FALSE	1	FALSE	Reactome	Cytokine Signaling in Immune system	1	0	1	1	1	0	1024
IL18	ENSG00000150782	interleukin 18	1015	2	FALSE	FALSE	FALSE	FALSE	FALSE	TRUE	FALSE	FALSE	FALSE	FALSE	TRUE	FALSE	Cytoplasm	0	3	CHEMBL2109606	GSK-1070806	FALSE	2	FALSE	Reactome	Cytokine Signaling in Immune system	1	0	1	1	1	0	1024
IL18	ENSG00000150782	interleukin 18	1015	2	FALSE	FALSE	FALSE	FALSE	FALSE	TRUE	FALSE	FALSE	FALSE	FALSE	TRUE	FALSE	Cytoplasm	0	3	CHEMBL2108054	TADEKINIG ALFA	FALSE	3	FALSE	Reactome	Cytokine Signaling in Immune system	1	0	1	1	1	0	1024
IL18	ENSG00000150782	interleukin 18	1015	2	FALSE	FALSE	FALSE	FALSE	FALSE	TRUE	FALSE	FALSE	FALSE	FALSE	TRUE	FALSE	Cytoplasm	0	3	CHEMBL2109606	GSK-1070806	FALSE	2	FALSE	Reactome	Cytokine Signaling in Immune system	1	0	1	1	1	0	1024
IL18	ENSG00000150782	interleukin 18	1015	2	FALSE	FALSE	FALSE	FALSE	FALSE	TRUE	FALSE	FALSE	FALSE	FALSE	TRUE	FALSE	Cytoplasm	0	3	CHEMBL2108054	TADEKINIG ALFA	FALSE	3	FALSE	Reactome	Cytokine Signaling in Immune system	1	0	1	1	1	0	1024
IL18	ENSG00000150782	interleukin 18	1015	2	FALSE	FALSE	FALSE	FALSE	FALSE	TRUE	FALSE	FALSE	FALSE	FALSE	TRUE	FALSE	Cytoplasm	0	3	CHEMBL2109604	MEDI-2338	FALSE	1	FALSE	Reactome	Cytokine Signaling in Immune system	1	0	1	1	1	0	1024
IL18	ENSG00000150782	interleukin 18	1015	2	FALSE	FALSE	FALSE	FALSE	FALSE	TRUE	FALSE	FALSE	FALSE	FALSE	TRUE	FALSE	Cytoplasm	0	3	CHEMBL2109606	GSK-1070806	FALSE	2	FALSE	Reactome	Cytokine Signaling in Immune system	1	0	1	1	1	0	1024
IL18	ENSG00000150782	interleukin 18	1015	2	FALSE	FALSE	FALSE	FALSE	FALSE	TRUE	FALSE	FALSE	FALSE	FALSE	TRUE	FALSE	Cytoplasm	0	3	CHEMBL2109606	GSK-1070806	FALSE	2	FALSE	Reactome	Cytokine Signaling in Immune system	1	0	1	1	1	0	1024
CSF2	ENSG00000164400	colony stimulating factor 2	1002	2	FALSE	FALSE	FALSE	FALSE	FALSE	TRUE	FALSE	FALSE	FALSE	FALSE	FALSE	FALSE	Secreted	0	4	CHEMBL3707325	LENZILUMAB	FALSE	3	FALSE	Reactome	Cytokine Signaling in Immune system	1	0	2	2	0	0	1014
CSF2	ENSG00000164400	colony stimulating factor 2	1002	2	FALSE	FALSE	FALSE	FALSE	FALSE	TRUE	FALSE	FALSE	FALSE	FALSE	FALSE	FALSE	Secreted	0	4	CHEMBL1743044	NAMILUMAB	FALSE	2	FALSE	Reactome	Cytokine Signaling in Immune system	1	0	2	2	0	0	1014
CSF2	ENSG00000164400	colony stimulating factor 2	1002	2	FALSE	FALSE	FALSE	FALSE	FALSE	TRUE	FALSE	FALSE	FALSE	FALSE	FALSE	FALSE	Secreted	0	4	CHEMBL2109430	GIMSILUMAB	FALSE	2	FALSE	Reactome	Cytokine Signaling in Immune system	1	0	2	2	0	0	1014
CSF2	ENSG00000164400	colony stimulating factor 2	1002	2	FALSE	FALSE	FALSE	FALSE	FALSE	TRUE	FALSE	FALSE	FALSE	FALSE	FALSE	FALSE	Secreted	0	4	CHEMBL3707325	LENZILUMAB	FALSE	3	FALSE	Reactome	Cytokine Signaling in Immune system	1	0	2	2	0	0	1014
CSF2	ENSG00000164400	colony stimulating factor 2	1002	2	FALSE	FALSE	FALSE	FALSE	FALSE	TRUE	FALSE	FALSE	FALSE	FALSE	FALSE	FALSE	Secreted	0	4	CHEMBL3707325	LENZILUMAB	FALSE	3	FALSE	Reactome	Cytokine Signaling in Immune system	1	0	2	2	0	0	1014
CSF2	ENSG00000164400	colony stimulating factor 2	1002	2	FALSE	FALSE	FALSE	FALSE	FALSE	TRUE	FALSE	FALSE	FALSE	FALSE	FALSE	FALSE	Secreted	0	4	CHEMBL3707325	LENZILUMAB	FALSE	3	FALSE	Reactome	Cytokine Signaling in Immune system	1	0	2	2	0	0	1014
CSF2	ENSG00000164400	colony stimulating factor 2	1002	2	FALSE	FALSE	FALSE	FALSE	FALSE	TRUE	FALSE	FALSE	FALSE	FALSE	FALSE	FALSE	Secreted	0	4	CHEMBL2109430	GIMSILUMAB	FALSE	2	FALSE	Reactome	Cytokine Signaling in Immune system	1	0	2	2	0	0	1014
CSF2	ENSG00000164400	colony stimulating factor 2	1002	2	FALSE	FALSE	FALSE	FALSE	FALSE	TRUE	FALSE	FALSE	FALSE	FALSE	FALSE	FALSE	Secreted	0	4	CHEMBL1743044	NAMILUMAB	FALSE	2	FALSE	Reactome	Cytokine Signaling in Immune system	1	0	2	2	0	0	1014
CSF2	ENSG00000164400	colony stimulating factor 2	1002	2	FALSE	FALSE	FALSE	FALSE	FALSE	TRUE	FALSE	FALSE	FALSE	FALSE	FALSE	FALSE	Secreted	0	4	CHEMBL3707325	LENZILUMAB	FALSE	3	FALSE	Reactome	Cytokine Signaling in Immune system	1	0	2	2	0	0	1014
CSF2	ENSG00000164400	colony stimulating factor 2	1002	2	FALSE	FALSE	FALSE	FALSE	FALSE	TRUE	FALSE	FALSE	FALSE	FALSE	FALSE	FALSE	Secreted	0	4	CHEMBL3707325	LENZILUMAB	FALSE	3	FALSE	Reactome	Cytokine Signaling in Immune system	1	0	2	2	0	0	1014
CSF2	ENSG00000164400	colony stimulating factor 2	1002	2	FALSE	FALSE	FALSE	FALSE	FALSE	TRUE	FALSE	FALSE	FALSE	FALSE	FALSE	FALSE	Secreted	0	4	CHEMBL3707325	LENZILUMAB	FALSE	3	FALSE	Reactome	Cytokine Signaling in Immune system	1	0	2	2	0	0	1014
CSF2	ENSG00000164400	colony stimulating factor 2	1002	2	FALSE	FALSE	FALSE	FALSE	FALSE	TRUE	FALSE	FALSE	FALSE	FALSE	FALSE	FALSE	Secreted	0	4	CHEMBL2109433	OTILIMAB	FALSE	3	FALSE	Reactome	Cytokine Signaling in Immune system	1	0	2	2	0	0	1014
CSF2	ENSG00000164400	colony stimulating factor 2	1002	2	FALSE	FALSE	FALSE	FALSE	FALSE	TRUE	FALSE	FALSE	FALSE	FALSE	FALSE	FALSE	Secreted	0	4	CHEMBL2109433	OTILIMAB	FALSE	3	FALSE	Reactome	Cytokine Signaling in Immune system	1	0	2	2	0	0	1014
CSF2	ENSG00000164400	colony stimulating factor 2	1002	2	FALSE	FALSE	FALSE	FALSE	FALSE	TRUE	FALSE	FALSE	FALSE	FALSE	FALSE	FALSE	Secreted	0	4	CHEMBL1743044	NAMILUMAB	FALSE	2	FALSE	Reactome	Cytokine Signaling in Immune system	1	0	2	2	0	0	1014
CSF2	ENSG00000164400	colony stimulating factor 2	1002	2	FALSE	FALSE	FALSE	FALSE	FALSE	TRUE	FALSE	FALSE	FALSE	FALSE	FALSE	FALSE	Secreted	0	4	CHEMBL2109433	OTILIMAB	FALSE	3	FALSE	Reactome	Cytokine Signaling in Immune system	1	0	2	2	0	0	1014
CSF2	ENSG00000164400	colony stimulating factor 2	1002	2	FALSE	FALSE	FALSE	FALSE	FALSE	TRUE	FALSE	FALSE	FALSE	FALSE	FALSE	FALSE	Secreted	0	4	CHEMBL2109433	OTILIMAB	FALSE	3	FALSE	Reactome	Cytokine Signaling in Immune system	1	0	2	2	0	0	1014
CSF2	ENSG00000164400	colony stimulating factor 2	1002	2	FALSE	FALSE	FALSE	FALSE	FALSE	TRUE	FALSE	FALSE	FALSE	FALSE	FALSE	FALSE	Secreted	0	4	CHEMBL2109433	OTILIMAB	FALSE	3	FALSE	Reactome	Cytokine Signaling in Immune system	1	0	2	2	0	0	1014
CSF2	ENSG00000164400	colony stimulating factor 2	1002	2	FALSE	FALSE	FALSE	FALSE	FALSE	TRUE	FALSE	FALSE	FALSE	FALSE	FALSE	FALSE	Secreted	0	4	CHEMBL1743044	NAMILUMAB	FALSE	2	FALSE	Reactome	Cytokine Signaling in Immune system	1	0	2	2	0	0	1014
CSF2	ENSG00000164400	colony stimulating factor 2	1002	2	FALSE	FALSE	FALSE	FALSE	FALSE	TRUE	FALSE	FALSE	FALSE	FALSE	FALSE	FALSE	Secreted	0	4	CHEMBL2109433	OTILIMAB	FALSE	3	FALSE	Reactome	Cytokine Signaling in Immune system	1	0	2	2	0	0	1014
CSF2	ENSG00000164400	colony stimulating factor 2	1002	2	FALSE	FALSE	FALSE	FALSE	FALSE	TRUE	FALSE	FALSE	FALSE	FALSE	FALSE	FALSE	Secreted	0	4	CHEMBL2109433	OTILIMAB	FALSE	3	FALSE	Reactome	Cytokine Signaling in Immune system	1	0	2	2	0	0	1014
CSF2	ENSG00000164400	colony stimulating factor 2	1002	2	FALSE	FALSE	FALSE	FALSE	FALSE	TRUE	FALSE	FALSE	FALSE	FALSE	FALSE	FALSE	Secreted	0	4	CHEMBL1743044	NAMILUMAB	FALSE	2	FALSE	Reactome	Cytokine Signaling in Immune system	1	0	2	2	0	0	1014
CSF2	ENSG00000164400	colony stimulating factor 2	1002	2	FALSE	FALSE	FALSE	FALSE	FALSE	TRUE	FALSE	FALSE	FALSE	FALSE	FALSE	FALSE	Secreted	0	4	CHEMBL2109433	OTILIMAB	FALSE	3	FALSE	Reactome	Cytokine Signaling in Immune system	1	0	2	2	0	0	1014
CSF2	ENSG00000164400	colony stimulating factor 2	1002	2	FALSE	FALSE	FALSE	FALSE	FALSE	TRUE	FALSE	FALSE	FALSE	FALSE	FALSE	FALSE	Secreted	0	4	CHEMBL2109433	OTILIMAB	FALSE	3	FALSE	Reactome	Cytokine Signaling in Immune system	1	0	2	2	0	0	1014
CSF2	ENSG00000164400	colony stimulating factor 2	1002	2	FALSE	FALSE	FALSE	FALSE	FALSE	TRUE	FALSE	FALSE	FALSE	FALSE	FALSE	FALSE	Secreted	0	4	CHEMBL1743044	NAMILUMAB	FALSE	2	FALSE	Reactome	Cytokine Signaling in Immune system	1	0	2	2	0	0	1014
CCND1	ENSG00000110092	cyclin D1	999	3	FALSE	FALSE	TRUE	TRUE	FALSE	FALSE	FALSE	FALSE	FALSE	FALSE	FALSE	FALSE	Nucleus	1	1	CHEMBL1206245	BRICICLIB	FALSE	1	FALSE	Reactome	Mitotic G1-G1/S phases	4	0	0	0	1	0	1005.5
CCND1	ENSG00000110092	cyclin D1	999	3	FALSE	FALSE	TRUE	TRUE	FALSE	FALSE	FALSE	FALSE	FALSE	FALSE	FALSE	FALSE	Nucleus	1	1	CHEMBL1206245	BRICICLIB	FALSE	1	FALSE	Reactome	G1/S Transition	4	0	0	0	1	0	1005.5
CCND1	ENSG00000110092	cyclin D1	999	3	FALSE	FALSE	TRUE	TRUE	FALSE	FALSE	FALSE	FALSE	FALSE	FALSE	FALSE	FALSE	Nucleus	1	1	CHEMBL1206245	BRICICLIB	FALSE	1	FALSE	Reactome	G1/S Transition	4	0	0	0	1	0	1005.5
CCND1	ENSG00000110092	cyclin D1	999	3	FALSE	FALSE	TRUE	TRUE	FALSE	FALSE	FALSE	FALSE	FALSE	FALSE	FALSE	FALSE	Nucleus	1	1	CHEMBL1206245	BRICICLIB	FALSE	1	FALSE	Reactome	S Phase	4	0	0	0	1	0	1005.5
CCND1	ENSG00000110092	cyclin D1	999	3	FALSE	FALSE	TRUE	TRUE	FALSE	FALSE	FALSE	FALSE	FALSE	FALSE	FALSE	FALSE	Nucleus	1	1	CHEMBL1206245	BRICICLIB	FALSE	1	FALSE	Reactome	Cytokine Signaling in Immune system	4	0	0	0	1	0	1005.5
CCND1	ENSG00000110092	cyclin D1	999	3	FALSE	FALSE	TRUE	TRUE	FALSE	FALSE	FALSE	FALSE	FALSE	FALSE	FALSE	FALSE	Nucleus	1	1	CHEMBL1206245	BRICICLIB	FALSE	1	FALSE	Reactome	Mitotic G1-G1/S phases	4	0	0	0	1	0	1005.5
CCND1	ENSG00000110092	cyclin D1	999	3	FALSE	FALSE	TRUE	TRUE	FALSE	FALSE	FALSE	FALSE	FALSE	FALSE	FALSE	FALSE	Nucleus	1	1	CHEMBL1206245	BRICICLIB	FALSE	1	FALSE	Reactome	Cytokine Signaling in Immune system	4	0	0	0	1	0	1005.5
CCND1	ENSG00000110092	cyclin D1	999	3	FALSE	FALSE	TRUE	TRUE	FALSE	FALSE	FALSE	FALSE	FALSE	FALSE	FALSE	FALSE	Nucleus	1	1	CHEMBL1206245	BRICICLIB	FALSE	1	FALSE	Reactome	S Phase	4	0	0	0	1	0	1005.5
CD44	ENSG00000026508	CD44 molecule (Indian blood group)	977	2	FALSE	FALSE	FALSE	FALSE	FALSE	FALSE	FALSE	FALSE	FALSE	FALSE	FALSE	FALSE	Cell membrane	0	1	CHEMBL2108413	BIVATUZUMAB	FALSE	1	FALSE	Reactome	Cytokine Signaling in Immune system	2	0	0	0	1	0	982.5
CD44	ENSG00000026508	CD44 molecule (Indian blood group)	977	2	FALSE	FALSE	FALSE	FALSE	FALSE	FALSE	FALSE	FALSE	FALSE	FALSE	FALSE	FALSE	Cell membrane	0	1	CHEMBL2108413	BIVATUZUMAB	FALSE	1	FALSE	Reactome	Interferon Signaling	2	0	0	0	1	0	982.5
CD44	ENSG00000026508	CD44 molecule (Indian blood group)	977	2	FALSE	FALSE	FALSE	FALSE	FALSE	FALSE	FALSE	FALSE	FALSE	FALSE	FALSE	FALSE	Cell membrane	0	1	CHEMBL2108413	BIVATUZUMAB	FALSE	1	FALSE	Reactome	Interferon Signaling	2	0	0	0	1	0	982.5
CD44	ENSG00000026508	CD44 molecule (Indian blood group)	977	2	FALSE	FALSE	FALSE	FALSE	FALSE	FALSE	FALSE	FALSE	FALSE	FALSE	FALSE	FALSE	Cell membrane	0	1	CHEMBL2108413	BIVATUZUMAB	FALSE	1	FALSE	Reactome	Interferon Signaling	2	0	0	0	1	0	982.5
CD44	ENSG00000026508	CD44 molecule (Indian blood group)	977	2	FALSE	FALSE	FALSE	FALSE	FALSE	FALSE	FALSE	FALSE	FALSE	FALSE	FALSE	FALSE	Cell membrane	0	1	CHEMBL2108413	BIVATUZUMAB	FALSE	1	FALSE	Reactome	Cytokine Signaling in Immune system	2	0	0	0	1	0	982.5
CD44	ENSG00000026508	CD44 molecule (Indian blood group)	977	2	FALSE	FALSE	FALSE	FALSE	FALSE	FALSE	FALSE	FALSE	FALSE	FALSE	FALSE	FALSE	Cell membrane	0	1	CHEMBL2108413	BIVATUZUMAB	FALSE	1	FALSE	Reactome	Cytokine Signaling in Immune system	2	0	0	0	1	0	982.5
CD44	ENSG00000026508	CD44 molecule (Indian blood group)	977	2	FALSE	FALSE	FALSE	FALSE	FALSE	FALSE	FALSE	FALSE	FALSE	FALSE	FALSE	FALSE	Cell membrane	0	1	CHEMBL2108413	BIVATUZUMAB	FALSE	1	FALSE	Reactome	Cytokine Signaling in Immune system	2	0	0	0	1	0	982.5
CD44	ENSG00000026508	CD44 molecule (Indian blood group)	977	2	FALSE	FALSE	FALSE	FALSE	FALSE	FALSE	FALSE	FALSE	FALSE	FALSE	FALSE	FALSE	Cell membrane	0	1	CHEMBL2108413	BIVATUZUMAB	FALSE	1	FALSE	Reactome	Interferon Signaling	2	0	0	0	1	0	982.5
CASP3	ENSG00000164305	caspase 3	976	5	FALSE	TRUE	FALSE	TRUE	FALSE	FALSE	FALSE	FALSE	FALSE	FALSE	FALSE	FALSE	Cytoplasm	2	1	CHEMBL197672	EMRICASAN	FALSE	2	FALSE	Reactome	Cytokine Signaling in Immune system	1	0	0	1	0	0	980
CASP3	ENSG00000164305	caspase 3	976	5	FALSE	TRUE	FALSE	TRUE	FALSE	FALSE	FALSE	FALSE	FALSE	FALSE	FALSE	FALSE	Cytoplasm	2	1	CHEMBL197672	EMRICASAN	FALSE	2	FALSE	Reactome	Cytokine Signaling in Immune system	1	0	0	1	0	0	980
CASP3	ENSG00000164305	caspase 3	976	5	FALSE	TRUE	FALSE	TRUE	FALSE	FALSE	FALSE	FALSE	FALSE	FALSE	FALSE	FALSE	Cytoplasm	2	1	CHEMBL197672	EMRICASAN	FALSE	2	FALSE	Reactome	Cytokine Signaling in Immune system	1	0	0	1	0	0	980
CASP3	ENSG00000164305	caspase 3	976	5	FALSE	TRUE	FALSE	TRUE	FALSE	FALSE	FALSE	FALSE	FALSE	FALSE	FALSE	FALSE	Cytoplasm	2	1	CHEMBL197672	EMRICASAN	FALSE	2	FALSE	Reactome	Cytokine Signaling in Immune system	1	0	0	1	0	0	980
CASP3	ENSG00000164305	caspase 3	976	5	FALSE	TRUE	FALSE	TRUE	FALSE	FALSE	FALSE	FALSE	FALSE	FALSE	FALSE	FALSE	Cytoplasm	2	1	CHEMBL197672	EMRICASAN	FALSE	2	FALSE	Reactome	Cytokine Signaling in Immune system	1	0	0	1	0	0	980
CASP3	ENSG00000164305	caspase 3	976	5	FALSE	TRUE	FALSE	TRUE	FALSE	FALSE	FALSE	FALSE	FALSE	FALSE	FALSE	FALSE	Cytoplasm	2	1	CHEMBL197672	EMRICASAN	FALSE	2	FALSE	Reactome	Cytokine Signaling in Immune system	1	0	0	1	0	0	980
CASP3	ENSG00000164305	caspase 3	976	5	FALSE	TRUE	FALSE	TRUE	FALSE	FALSE	FALSE	FALSE	FALSE	FALSE	FALSE	FALSE	Cytoplasm	2	1	CHEMBL197672	EMRICASAN	FALSE	2	FALSE	Reactome	Cytokine Signaling in Immune system	1	0	0	1	0	0	980
CASP3	ENSG00000164305	caspase 3	976	5	FALSE	TRUE	FALSE	TRUE	FALSE	FALSE	FALSE	FALSE	FALSE	FALSE	FALSE	FALSE	Cytoplasm	2	1	CHEMBL197672	EMRICASAN	FALSE	2	FALSE	Reactome	Cytokine Signaling in Immune system	1	0	0	1	0	0	980
CASP3	ENSG00000164305	caspase 3	976	5	FALSE	TRUE	FALSE	TRUE	FALSE	FALSE	FALSE	FALSE	FALSE	FALSE	FALSE	FALSE	Cytoplasm	2	1	CHEMBL197672	EMRICASAN	FALSE	2	FALSE	Reactome	Cytokine Signaling in Immune system	1	0	0	1	0	0	980
NCAM1	ENSG00000149294	neural cell adhesion molecule 1	952	3	FALSE	FALSE	FALSE	FALSE	FALSE	TRUE	FALSE	FALSE	FALSE	FALSE	FALSE	FALSE	[Isoform 1]: Cell membrane	0	2	CHEMBL2109484	BB-10901	FALSE	2	FALSE	Reactome	Interferon Signaling	2	0	0	2	0	0	961
NCAM1	ENSG00000149294	neural cell adhesion molecule 1	952	3	FALSE	FALSE	FALSE	FALSE	FALSE	TRUE	FALSE	FALSE	FALSE	FALSE	FALSE	FALSE	[Isoform 1]: Cell membrane	0	2	CHEMBL1743037	LORVOTUZUMAB MERTANSINE	FALSE	2	FALSE	Reactome	Interferon Signaling	2	0	0	2	0	0	961
NCAM1	ENSG00000149294	neural cell adhesion molecule 1	952	3	FALSE	FALSE	FALSE	FALSE	FALSE	TRUE	FALSE	FALSE	FALSE	FALSE	FALSE	FALSE	[Isoform 1]: Cell membrane	0	2	CHEMBL2109484	BB-10901	FALSE	2	FALSE	Reactome	Interferon Signaling	2	0	0	2	0	0	961
NCAM1	ENSG00000149294	neural cell adhesion molecule 1	952	3	FALSE	FALSE	FALSE	FALSE	FALSE	TRUE	FALSE	FALSE	FALSE	FALSE	FALSE	FALSE	[Isoform 1]: Cell membrane	0	2	CHEMBL1743037	LORVOTUZUMAB MERTANSINE	FALSE	2	FALSE	Reactome	Interferon Signaling	2	0	0	2	0	0	961
NCAM1	ENSG00000149294	neural cell adhesion molecule 1	952	3	FALSE	FALSE	FALSE	FALSE	FALSE	TRUE	FALSE	FALSE	FALSE	FALSE	FALSE	FALSE	[Isoform 1]: Cell membrane	0	2	CHEMBL1743037	LORVOTUZUMAB MERTANSINE	FALSE	2	FALSE	Reactome	Cytokine Signaling in Immune system	2	0	0	2	0	0	961
NCAM1	ENSG00000149294	neural cell adhesion molecule 1	952	3	FALSE	FALSE	FALSE	FALSE	FALSE	TRUE	FALSE	FALSE	FALSE	FALSE	FALSE	FALSE	[Isoform 1]: Cell membrane	0	2	CHEMBL1743037	LORVOTUZUMAB MERTANSINE	FALSE	2	FALSE	Reactome	Cytokine Signaling in Immune system	2	0	0	2	0	0	961
NCAM1	ENSG00000149294	neural cell adhesion molecule 1	952	3	FALSE	FALSE	FALSE	FALSE	FALSE	TRUE	FALSE	FALSE	FALSE	FALSE	FALSE	FALSE	[Isoform 1]: Cell membrane	0	2	CHEMBL1743037	LORVOTUZUMAB MERTANSINE	FALSE	2	FALSE	Reactome	Cytokine Signaling in Immune system	2	0	0	2	0	0	961
NCAM1	ENSG00000149294	neural cell adhesion molecule 1	952	3	FALSE	FALSE	FALSE	FALSE	FALSE	TRUE	FALSE	FALSE	FALSE	FALSE	FALSE	FALSE	[Isoform 1]: Cell membrane	0	2	CHEMBL1743037	LORVOTUZUMAB MERTANSINE	FALSE	2	FALSE	Reactome	Cytokine Signaling in Immune system	2	0	0	2	0	0	961
NCAM1	ENSG00000149294	neural cell adhesion molecule 1	952	3	FALSE	FALSE	FALSE	FALSE	FALSE	TRUE	FALSE	FALSE	FALSE	FALSE	FALSE	FALSE	[Isoform 1]: Cell membrane	0	2	CHEMBL1743037	LORVOTUZUMAB MERTANSINE	FALSE	2	FALSE	Reactome	Cytokine Signaling in Immune system	2	0	0	2	0	0	961
NCAM1	ENSG00000149294	neural cell adhesion molecule 1	952	3	FALSE	FALSE	FALSE	FALSE	FALSE	TRUE	FALSE	FALSE	FALSE	FALSE	FALSE	FALSE	[Isoform 1]: Cell membrane	0	2	CHEMBL1743037	LORVOTUZUMAB MERTANSINE	FALSE	2	FALSE	Reactome	Cytokine Signaling in Immune system	2	0	0	2	0	0	961
NCAM1	ENSG00000149294	neural cell adhesion molecule 1	952	3	FALSE	FALSE	FALSE	FALSE	FALSE	TRUE	FALSE	FALSE	FALSE	FALSE	FALSE	FALSE	[Isoform 1]: Cell membrane	0	2	CHEMBL1743037	LORVOTUZUMAB MERTANSINE	FALSE	2	FALSE	Reactome	Interferon Signaling	2	0	0	2	0	0	961
NCAM1	ENSG00000149294	neural cell adhesion molecule 1	952	3	FALSE	FALSE	FALSE	FALSE	FALSE	TRUE	FALSE	FALSE	FALSE	FALSE	FALSE	FALSE	[Isoform 1]: Cell membrane	0	2	CHEMBL1743037	LORVOTUZUMAB MERTANSINE	FALSE	2	FALSE	Reactome	Interferon Signaling	2	0	0	2	0	0	961
NCAM1	ENSG00000149294	neural cell adhesion molecule 1	952	3	FALSE	FALSE	FALSE	FALSE	FALSE	TRUE	FALSE	FALSE	FALSE	FALSE	FALSE	FALSE	[Isoform 1]: Cell membrane	0	2	CHEMBL1743037	LORVOTUZUMAB MERTANSINE	FALSE	2	FALSE	Reactome	Interferon Signaling	2	0	0	2	0	0	961
NCAM1	ENSG00000149294	neural cell adhesion molecule 1	952	3	FALSE	FALSE	FALSE	FALSE	FALSE	TRUE	FALSE	FALSE	FALSE	FALSE	FALSE	FALSE	[Isoform 1]: Cell membrane	0	2	CHEMBL1743037	LORVOTUZUMAB MERTANSINE	FALSE	2	FALSE	Reactome	Interferon Signaling	2	0	0	2	0	0	961
NCAM1	ENSG00000149294	neural cell adhesion molecule 1	952	3	FALSE	FALSE	FALSE	FALSE	FALSE	TRUE	FALSE	FALSE	FALSE	FALSE	FALSE	FALSE	[Isoform 1]: Cell membrane	0	2	CHEMBL1743037	LORVOTUZUMAB MERTANSINE	FALSE	2	FALSE	Reactome	Cytokine Signaling in Immune system	2	0	0	2	0	0	961
NCAM1	ENSG00000149294	neural cell adhesion molecule 1	952	3	FALSE	FALSE	FALSE	FALSE	FALSE	TRUE	FALSE	FALSE	FALSE	FALSE	FALSE	FALSE	[Isoform 1]: Cell membrane	0	2	CHEMBL1743037	LORVOTUZUMAB MERTANSINE	FALSE	2	FALSE	Reactome	Cytokine Signaling in Immune system	2	0	0	2	0	0	961
NCAM1	ENSG00000149294	neural cell adhesion molecule 1	952	3	FALSE	FALSE	FALSE	FALSE	FALSE	TRUE	FALSE	FALSE	FALSE	FALSE	FALSE	FALSE	[Isoform 1]: Cell membrane	0	2	CHEMBL1743037	LORVOTUZUMAB MERTANSINE	FALSE	2	FALSE	Reactome	Interferon Signaling	2	0	0	2	0	0	961
NCAM1	ENSG00000149294	neural cell adhesion molecule 1	952	3	FALSE	FALSE	FALSE	FALSE	FALSE	TRUE	FALSE	FALSE	FALSE	FALSE	FALSE	FALSE	[Isoform 1]: Cell membrane	0	2	CHEMBL1743037	LORVOTUZUMAB MERTANSINE	FALSE	2	FALSE	Reactome	Cytokine Signaling in Immune system	2	0	0	2	0	0	961
NCAM1	ENSG00000149294	neural cell adhesion molecule 1	952	3	FALSE	FALSE	FALSE	FALSE	FALSE	TRUE	FALSE	FALSE	FALSE	FALSE	FALSE	FALSE	[Isoform 1]: Cell membrane	0	2	CHEMBL1743037	LORVOTUZUMAB MERTANSINE	FALSE	2	FALSE	Reactome	Interferon Signaling	2	0	0	2	0	0	961
NCAM1	ENSG00000149294	neural cell adhesion molecule 1	952	3	FALSE	FALSE	FALSE	FALSE	FALSE	TRUE	FALSE	FALSE	FALSE	FALSE	FALSE	FALSE	[Isoform 1]: Cell membrane	0	2	CHEMBL2109484	BB-10901	FALSE	2	FALSE	Reactome	Cytokine Signaling in Immune system	2	0	0	2	0	0	961
NCAM1	ENSG00000149294	neural cell adhesion molecule 1	952	3	FALSE	FALSE	FALSE	FALSE	FALSE	TRUE	FALSE	FALSE	FALSE	FALSE	FALSE	FALSE	[Isoform 1]: Cell membrane	0	2	CHEMBL2109484	BB-10901	FALSE	2	FALSE	Reactome	Cytokine Signaling in Immune system	2	0	0	2	0	0	961
NCAM1	ENSG00000149294	neural cell adhesion molecule 1	952	3	FALSE	FALSE	FALSE	FALSE	FALSE	TRUE	FALSE	FALSE	FALSE	FALSE	FALSE	FALSE	[Isoform 1]: Cell membrane	0	2	CHEMBL1743037	LORVOTUZUMAB MERTANSINE	FALSE	2	FALSE	Reactome	Interferon Signaling	2	0	0	2	0	0	961
FGF2	ENSG00000138685	fibroblast growth factor 2	908	5	FALSE	FALSE	FALSE	TRUE	FALSE	FALSE	FALSE	FALSE	FALSE	FALSE	TRUE	FALSE	Secreted	0	1	CHEMBL4297163	MUPARFOSTAT	FALSE	3	FALSE	Reactome	Cytokine Signaling in Immune system	1	0	1	0	0	0	916.5
FGF2	ENSG00000138685	fibroblast growth factor 2	908	5	FALSE	FALSE	FALSE	TRUE	FALSE	FALSE	FALSE	FALSE	FALSE	FALSE	TRUE	FALSE	Secreted	0	1	CHEMBL4297163	MUPARFOSTAT	FALSE	3	FALSE	Reactome	Cytokine Signaling in Immune system	1	0	1	0	0	0	916.5
FGF2	ENSG00000138685	fibroblast growth factor 2	908	5	FALSE	FALSE	FALSE	TRUE	FALSE	FALSE	FALSE	FALSE	FALSE	FALSE	TRUE	FALSE	Secreted	0	1	CHEMBL4297163	MUPARFOSTAT	FALSE	3	FALSE	Reactome	Cytokine Signaling in Immune system	1	0	1	0	0	0	916.5
FGF2	ENSG00000138685	fibroblast growth factor 2	908	5	FALSE	FALSE	FALSE	TRUE	FALSE	FALSE	FALSE	FALSE	FALSE	FALSE	TRUE	FALSE	Secreted	0	1	CHEMBL4297163	MUPARFOSTAT	FALSE	3	FALSE	Reactome	Cytokine Signaling in Immune system	1	0	1	0	0	0	916.5
FGF2	ENSG00000138685	fibroblast growth factor 2	908	5	FALSE	FALSE	FALSE	TRUE	FALSE	FALSE	FALSE	FALSE	FALSE	FALSE	TRUE	FALSE	Secreted	0	1	CHEMBL4297163	MUPARFOSTAT	FALSE	3	FALSE	Reactome	Cytokine Signaling in Immune system	1	0	1	0	0	0	916.5
FGF2	ENSG00000138685	fibroblast growth factor 2	908	5	FALSE	FALSE	FALSE	TRUE	FALSE	FALSE	FALSE	FALSE	FALSE	FALSE	TRUE	FALSE	Secreted	0	1	CHEMBL4297163	MUPARFOSTAT	FALSE	3	FALSE	Reactome	Cytokine Signaling in Immune system	1	0	1	0	0	0	916.5
FGF2	ENSG00000138685	fibroblast growth factor 2	908	5	FALSE	FALSE	FALSE	TRUE	FALSE	FALSE	FALSE	FALSE	FALSE	FALSE	TRUE	FALSE	Secreted	0	1	CHEMBL4297163	MUPARFOSTAT	FALSE	3	FALSE	Reactome	Cytokine Signaling in Immune system	1	0	1	0	0	0	916.5
CXCL10	ENSG00000169245	C-X-C motif chemokine ligand 10	906	3	FALSE	FALSE	FALSE	FALSE	FALSE	TRUE	FALSE	FALSE	FALSE	FALSE	FALSE	FALSE	Secreted	1	2	CHEMBL2109664	ELDELUMAB	FALSE	2	FALSE	Reactome	Cytokine Signaling in Immune system	1	0	0	2	0	0	912
CXCL10	ENSG00000169245	C-X-C motif chemokine ligand 10	906	3	FALSE	FALSE	FALSE	FALSE	FALSE	TRUE	FALSE	FALSE	FALSE	FALSE	FALSE	FALSE	Secreted	1	2	CHEMBL2109664	ELDELUMAB	FALSE	2	FALSE	Reactome	Cytokine Signaling in Immune system	1	0	0	2	0	0	912
CXCL10	ENSG00000169245	C-X-C motif chemokine ligand 10	906	3	FALSE	FALSE	FALSE	FALSE	FALSE	TRUE	FALSE	FALSE	FALSE	FALSE	FALSE	FALSE	Secreted	1	2	CHEMBL2109664	ELDELUMAB	FALSE	2	FALSE	Reactome	Cytokine Signaling in Immune system	1	0	0	2	0	0	912
CXCL10	ENSG00000169245	C-X-C motif chemokine ligand 10	906	3	FALSE	FALSE	FALSE	FALSE	FALSE	TRUE	FALSE	FALSE	FALSE	FALSE	FALSE	FALSE	Secreted	1	2	CHEMBL2109379	NI-0801	FALSE	2	FALSE	Reactome	Cytokine Signaling in Immune system	1	0	0	2	0	0	912
CXCL10	ENSG00000169245	C-X-C motif chemokine ligand 10	906	3	FALSE	FALSE	FALSE	FALSE	FALSE	TRUE	FALSE	FALSE	FALSE	FALSE	FALSE	FALSE	Secreted	1	2	CHEMBL2109664	ELDELUMAB	FALSE	2	FALSE	Reactome	Cytokine Signaling in Immune system	1	0	0	2	0	0	912
CXCL10	ENSG00000169245	C-X-C motif chemokine ligand 10	906	3	FALSE	FALSE	FALSE	FALSE	FALSE	TRUE	FALSE	FALSE	FALSE	FALSE	FALSE	FALSE	Secreted	1	2	CHEMBL2109379	NI-0801	FALSE	2	FALSE	Reactome	Cytokine Signaling in Immune system	1	0	0	2	0	0	912
MAPK3	ENSG00000102882	mitogen-activated protein kinase 3	899	4	FALSE	TRUE	FALSE	TRUE	FALSE	FALSE	FALSE	FALSE	FALSE	FALSE	FALSE	FALSE	Cytoplasm	2	5	CHEMBL4650285	TEMUTERKIB	FALSE	2	FALSE	KEGG	HIF-1 signaling pathway	4	0	0	2	3	0	911.5
MAPK3	ENSG00000102882	mitogen-activated protein kinase 3	899	4	FALSE	TRUE	FALSE	TRUE	FALSE	FALSE	FALSE	FALSE	FALSE	FALSE	FALSE	FALSE	Cytoplasm	2	5	CHEMBL4650285	TEMUTERKIB	FALSE	2	FALSE	KEGG	HIF-1 signaling pathway	4	0	0	2	3	0	911.5
MAPK3	ENSG00000102882	mitogen-activated protein kinase 3	899	4	FALSE	TRUE	FALSE	TRUE	FALSE	FALSE	FALSE	FALSE	FALSE	FALSE	FALSE	FALSE	Cytoplasm	2	5	CHEMBL3590106	ULIXERTINIB	FALSE	2	FALSE	Reactome	ISG15 antiviral mechanism	4	0	0	2	3	0	911.5
MAPK3	ENSG00000102882	mitogen-activated protein kinase 3	899	4	FALSE	TRUE	FALSE	TRUE	FALSE	FALSE	FALSE	FALSE	FALSE	FALSE	FALSE	FALSE	Cytoplasm	2	5	CHEMBL4650285	TEMUTERKIB	FALSE	2	FALSE	KEGG	HIF-1 signaling pathway	4	0	0	2	3	0	911.5
MAPK3	ENSG00000102882	mitogen-activated protein kinase 3	899	4	FALSE	TRUE	FALSE	TRUE	FALSE	FALSE	FALSE	FALSE	FALSE	FALSE	FALSE	FALSE	Cytoplasm	2	5	CHEMBL4650285	TEMUTERKIB	FALSE	2	FALSE	Reactome	ISG15 antiviral mechanism	4	0	0	2	3	0	911.5
MAPK3	ENSG00000102882	mitogen-activated protein kinase 3	899	4	FALSE	TRUE	FALSE	TRUE	FALSE	FALSE	FALSE	FALSE	FALSE	FALSE	FALSE	FALSE	Cytoplasm	2	5	CHEMBL3590106	ULIXERTINIB	FALSE	2	FALSE	Reactome	ISG15 antiviral mechanism	4	0	0	2	3	0	911.5
MAPK3	ENSG00000102882	mitogen-activated protein kinase 3	899	4	FALSE	TRUE	FALSE	TRUE	FALSE	FALSE	FALSE	FALSE	FALSE	FALSE	FALSE	FALSE	Cytoplasm	2	5	CHEMBL4650285	TEMUTERKIB	FALSE	2	FALSE	Reactome	ISG15 antiviral mechanism	4	0	0	2	3	0	911.5
MAPK3	ENSG00000102882	mitogen-activated protein kinase 3	899	4	FALSE	TRUE	FALSE	TRUE	FALSE	FALSE	FALSE	FALSE	FALSE	FALSE	FALSE	FALSE	Cytoplasm	2	5	CHEMBL4650284	KO-947	FALSE	1	FALSE	Reactome	ISG15 antiviral mechanism	4	0	0	2	3	0	911.5
MAPK3	ENSG00000102882	mitogen-activated protein kinase 3	899	4	FALSE	TRUE	FALSE	TRUE	FALSE	FALSE	FALSE	FALSE	FALSE	FALSE	FALSE	FALSE	Cytoplasm	2	5	CHEMBL3544964	RAVOXERTINIB	FALSE	1	FALSE	KEGG	HIF-1 signaling pathway	4	0	0	2	3	0	911.5
MAPK3	ENSG00000102882	mitogen-activated protein kinase 3	899	4	FALSE	TRUE	FALSE	TRUE	FALSE	FALSE	FALSE	FALSE	FALSE	FALSE	FALSE	FALSE	Cytoplasm	2	5	CHEMBL3590106	ULIXERTINIB	FALSE	2	FALSE	Reactome	ISG15 antiviral mechanism	4	0	0	2	3	0	911.5
MAPK3	ENSG00000102882	mitogen-activated protein kinase 3	899	4	FALSE	TRUE	FALSE	TRUE	FALSE	FALSE	FALSE	FALSE	FALSE	FALSE	FALSE	FALSE	Cytoplasm	2	5	CHEMBL3590106	ULIXERTINIB	FALSE	2	FALSE	Reactome	Interferon Signaling	4	0	0	2	3	0	911.5
MAPK3	ENSG00000102882	mitogen-activated protein kinase 3	899	4	FALSE	TRUE	FALSE	TRUE	FALSE	FALSE	FALSE	FALSE	FALSE	FALSE	FALSE	FALSE	Cytoplasm	2	5	CHEMBL3590106	ULIXERTINIB	FALSE	2	FALSE	Reactome	ISG15 antiviral mechanism	4	0	0	2	3	0	911.5
MAPK3	ENSG00000102882	mitogen-activated protein kinase 3	899	4	FALSE	TRUE	FALSE	TRUE	FALSE	FALSE	FALSE	FALSE	FALSE	FALSE	FALSE	FALSE	Cytoplasm	2	5	CHEMBL3590106	ULIXERTINIB	FALSE	2	FALSE	Reactome	Cytokine Signaling in Immune system	4	0	0	2	3	0	911.5
MAPK3	ENSG00000102882	mitogen-activated protein kinase 3	899	4	FALSE	TRUE	FALSE	TRUE	FALSE	FALSE	FALSE	FALSE	FALSE	FALSE	FALSE	FALSE	Cytoplasm	2	5	CHEMBL3590106	ULIXERTINIB	FALSE	2	FALSE	KEGG	HIF-1 signaling pathway	4	0	0	2	3	0	911.5
MAPK3	ENSG00000102882	mitogen-activated protein kinase 3	899	4	FALSE	TRUE	FALSE	TRUE	FALSE	FALSE	FALSE	FALSE	FALSE	FALSE	FALSE	FALSE	Cytoplasm	2	5	CHEMBL3545001	MK-8353	FALSE	1	FALSE	Reactome	Interferon Signaling	4	0	0	2	3	0	911.5
MAPK3	ENSG00000102882	mitogen-activated protein kinase 3	899	4	FALSE	TRUE	FALSE	TRUE	FALSE	FALSE	FALSE	FALSE	FALSE	FALSE	FALSE	FALSE	Cytoplasm	2	5	CHEMBL4650285	TEMUTERKIB	FALSE	2	FALSE	Reactome	Cytokine Signaling in Immune system	4	0	0	2	3	0	911.5
MAPK3	ENSG00000102882	mitogen-activated protein kinase 3	899	4	FALSE	TRUE	FALSE	TRUE	FALSE	FALSE	FALSE	FALSE	FALSE	FALSE	FALSE	FALSE	Cytoplasm	2	5	CHEMBL3590106	ULIXERTINIB	FALSE	2	FALSE	Reactome	ISG15 antiviral mechanism	4	0	0	2	3	0	911.5
MAPK3	ENSG00000102882	mitogen-activated protein kinase 3	899	4	FALSE	TRUE	FALSE	TRUE	FALSE	FALSE	FALSE	FALSE	FALSE	FALSE	FALSE	FALSE	Cytoplasm	2	5	CHEMBL3590106	ULIXERTINIB	FALSE	2	FALSE	KEGG	HIF-1 signaling pathway	4	0	0	2	3	0	911.5
MAPK3	ENSG00000102882	mitogen-activated protein kinase 3	899	4	FALSE	TRUE	FALSE	TRUE	FALSE	FALSE	FALSE	FALSE	FALSE	FALSE	FALSE	FALSE	Cytoplasm	2	5	CHEMBL3590106	ULIXERTINIB	FALSE	2	FALSE	KEGG	HIF-1 signaling pathway	4	0	0	2	3	0	911.5
MAPK3	ENSG00000102882	mitogen-activated protein kinase 3	899	4	FALSE	TRUE	FALSE	TRUE	FALSE	FALSE	FALSE	FALSE	FALSE	FALSE	FALSE	FALSE	Cytoplasm	2	5	CHEMBL3590106	ULIXERTINIB	FALSE	2	FALSE	Reactome	ISG15 antiviral mechanism	4	0	0	2	3	0	911.5
MAPK3	ENSG00000102882	mitogen-activated protein kinase 3	899	4	FALSE	TRUE	FALSE	TRUE	FALSE	FALSE	FALSE	FALSE	FALSE	FALSE	FALSE	FALSE	Cytoplasm	2	5	CHEMBL3590106	ULIXERTINIB	FALSE	2	FALSE	Reactome	Interferon Signaling	4	0	0	2	3	0	911.5
MAPK3	ENSG00000102882	mitogen-activated protein kinase 3	899	4	FALSE	TRUE	FALSE	TRUE	FALSE	FALSE	FALSE	FALSE	FALSE	FALSE	FALSE	FALSE	Cytoplasm	2	5	CHEMBL4650285	TEMUTERKIB	FALSE	2	FALSE	Reactome	Cytokine Signaling in Immune system	4	0	0	2	3	0	911.5
MAPK3	ENSG00000102882	mitogen-activated protein kinase 3	899	4	FALSE	TRUE	FALSE	TRUE	FALSE	FALSE	FALSE	FALSE	FALSE	FALSE	FALSE	FALSE	Cytoplasm	2	5	CHEMBL3590106	ULIXERTINIB	FALSE	2	FALSE	Reactome	Cytokine Signaling in Immune system	4	0	0	2	3	0	911.5
MAPK3	ENSG00000102882	mitogen-activated protein kinase 3	899	4	FALSE	TRUE	FALSE	TRUE	FALSE	FALSE	FALSE	FALSE	FALSE	FALSE	FALSE	FALSE	Cytoplasm	2	5	CHEMBL4650285	TEMUTERKIB	FALSE	2	FALSE	Reactome	ISG15 antiviral mechanism	4	0	0	2	3	0	911.5
MAPK3	ENSG00000102882	mitogen-activated protein kinase 3	899	4	FALSE	TRUE	FALSE	TRUE	FALSE	FALSE	FALSE	FALSE	FALSE	FALSE	FALSE	FALSE	Cytoplasm	2	5	CHEMBL3545001	MK-8353	FALSE	1	FALSE	KEGG	HIF-1 signaling pathway	4	0	0	2	3	0	911.5
MAPK3	ENSG00000102882	mitogen-activated protein kinase 3	899	4	FALSE	TRUE	FALSE	TRUE	FALSE	FALSE	FALSE	FALSE	FALSE	FALSE	FALSE	FALSE	Cytoplasm	2	5	CHEMBL4650284	KO-947	FALSE	1	FALSE	Reactome	Interferon Signaling	4	0	0	2	3	0	911.5
MAPK3	ENSG00000102882	mitogen-activated protein kinase 3	899	4	FALSE	TRUE	FALSE	TRUE	FALSE	FALSE	FALSE	FALSE	FALSE	FALSE	FALSE	FALSE	Cytoplasm	2	5	CHEMBL3590106	ULIXERTINIB	FALSE	2	FALSE	KEGG	HIF-1 signaling pathway	4	0	0	2	3	0	911.5
MAPK3	ENSG00000102882	mitogen-activated protein kinase 3	899	4	FALSE	TRUE	FALSE	TRUE	FALSE	FALSE	FALSE	FALSE	FALSE	FALSE	FALSE	FALSE	Cytoplasm	2	5	CHEMBL3545001	MK-8353	FALSE	1	FALSE	Reactome	Interferon Signaling	4	0	0	2	3	0	911.5
MAPK3	ENSG00000102882	mitogen-activated protein kinase 3	899	4	FALSE	TRUE	FALSE	TRUE	FALSE	FALSE	FALSE	FALSE	FALSE	FALSE	FALSE	FALSE	Cytoplasm	2	5	CHEMBL3590106	ULIXERTINIB	FALSE	2	FALSE	Reactome	Cytokine Signaling in Immune system	4	0	0	2	3	0	911.5
MAPK3	ENSG00000102882	mitogen-activated protein kinase 3	899	4	FALSE	TRUE	FALSE	TRUE	FALSE	FALSE	FALSE	FALSE	FALSE	FALSE	FALSE	FALSE	Cytoplasm	2	5	CHEMBL4650285	TEMUTERKIB	FALSE	2	FALSE	Reactome	Cytokine Signaling in Immune system	4	0	0	2	3	0	911.5
MAPK3	ENSG00000102882	mitogen-activated protein kinase 3	899	4	FALSE	TRUE	FALSE	TRUE	FALSE	FALSE	FALSE	FALSE	FALSE	FALSE	FALSE	FALSE	Cytoplasm	2	5	CHEMBL4650285	TEMUTERKIB	FALSE	2	FALSE	Reactome	Cytokine Signaling in Immune system	4	0	0	2	3	0	911.5
MAPK3	ENSG00000102882	mitogen-activated protein kinase 3	899	4	FALSE	TRUE	FALSE	TRUE	FALSE	FALSE	FALSE	FALSE	FALSE	FALSE	FALSE	FALSE	Cytoplasm	2	5	CHEMBL3590106	ULIXERTINIB	FALSE	2	FALSE	KEGG	HIF-1 signaling pathway	4	0	0	2	3	0	911.5
MAPK3	ENSG00000102882	mitogen-activated protein kinase 3	899	4	FALSE	TRUE	FALSE	TRUE	FALSE	FALSE	FALSE	FALSE	FALSE	FALSE	FALSE	FALSE	Cytoplasm	2	5	CHEMBL3545001	MK-8353	FALSE	1	FALSE	Reactome	ISG15 antiviral mechanism	4	0	0	2	3	0	911.5
MAPK3	ENSG00000102882	mitogen-activated protein kinase 3	899	4	FALSE	TRUE	FALSE	TRUE	FALSE	FALSE	FALSE	FALSE	FALSE	FALSE	FALSE	FALSE	Cytoplasm	2	5	CHEMBL3545001	MK-8353	FALSE	1	FALSE	Reactome	Interferon Signaling	4	0	0	2	3	0	911.5
MAPK3	ENSG00000102882	mitogen-activated protein kinase 3	899	4	FALSE	TRUE	FALSE	TRUE	FALSE	FALSE	FALSE	FALSE	FALSE	FALSE	FALSE	FALSE	Cytoplasm	2	5	CHEMBL3590106	ULIXERTINIB	FALSE	2	FALSE	Reactome	Interferon Signaling	4	0	0	2	3	0	911.5
MAPK3	ENSG00000102882	mitogen-activated protein kinase 3	899	4	FALSE	TRUE	FALSE	TRUE	FALSE	FALSE	FALSE	FALSE	FALSE	FALSE	FALSE	FALSE	Cytoplasm	2	5	CHEMBL3590106	ULIXERTINIB	FALSE	2	FALSE	Reactome	Cytokine Signaling in Immune system	4	0	0	2	3	0	911.5
MAPK3	ENSG00000102882	mitogen-activated protein kinase 3	899	4	FALSE	TRUE	FALSE	TRUE	FALSE	FALSE	FALSE	FALSE	FALSE	FALSE	FALSE	FALSE	Cytoplasm	2	5	CHEMBL4650284	KO-947	FALSE	1	FALSE	KEGG	HIF-1 signaling pathway	4	0	0	2	3	0	911.5
MAPK3	ENSG00000102882	mitogen-activated protein kinase 3	899	4	FALSE	TRUE	FALSE	TRUE	FALSE	FALSE	FALSE	FALSE	FALSE	FALSE	FALSE	FALSE	Cytoplasm	2	5	CHEMBL3590106	ULIXERTINIB	FALSE	2	FALSE	Reactome	Interferon Signaling	4	0	0	2	3	0	911.5
MAPK3	ENSG00000102882	mitogen-activated protein kinase 3	899	4	FALSE	TRUE	FALSE	TRUE	FALSE	FALSE	FALSE	FALSE	FALSE	FALSE	FALSE	FALSE	Cytoplasm	2	5	CHEMBL3590106	ULIXERTINIB	FALSE	2	FALSE	KEGG	HIF-1 signaling pathway	4	0	0	2	3	0	911.5
MAPK3	ENSG00000102882	mitogen-activated protein kinase 3	899	4	FALSE	TRUE	FALSE	TRUE	FALSE	FALSE	FALSE	FALSE	FALSE	FALSE	FALSE	FALSE	Cytoplasm	2	5	CHEMBL3545001	MK-8353	FALSE	1	FALSE	KEGG	HIF-1 signaling pathway	4	0	0	2	3	0	911.5
MAPK3	ENSG00000102882	mitogen-activated protein kinase 3	899	4	FALSE	TRUE	FALSE	TRUE	FALSE	FALSE	FALSE	FALSE	FALSE	FALSE	FALSE	FALSE	Cytoplasm	2	5	CHEMBL3544964	RAVOXERTINIB	FALSE	1	FALSE	Reactome	Cytokine Signaling in Immune system	4	0	0	2	3	0	911.5
MAPK3	ENSG00000102882	mitogen-activated protein kinase 3	899	4	FALSE	TRUE	FALSE	TRUE	FALSE	FALSE	FALSE	FALSE	FALSE	FALSE	FALSE	FALSE	Cytoplasm	2	5	CHEMBL4650285	TEMUTERKIB	FALSE	2	FALSE	Reactome	Interferon Signaling	4	0	0	2	3	0	911.5
MAPK3	ENSG00000102882	mitogen-activated protein kinase 3	899	4	FALSE	TRUE	FALSE	TRUE	FALSE	FALSE	FALSE	FALSE	FALSE	FALSE	FALSE	FALSE	Cytoplasm	2	5	CHEMBL3590106	ULIXERTINIB	FALSE	2	FALSE	Reactome	Cytokine Signaling in Immune system	4	0	0	2	3	0	911.5
MAPK3	ENSG00000102882	mitogen-activated protein kinase 3	899	4	FALSE	TRUE	FALSE	TRUE	FALSE	FALSE	FALSE	FALSE	FALSE	FALSE	FALSE	FALSE	Cytoplasm	2	5	CHEMBL3545001	MK-8353	FALSE	1	FALSE	KEGG	HIF-1 signaling pathway	4	0	0	2	3	0	911.5
MAPK3	ENSG00000102882	mitogen-activated protein kinase 3	899	4	FALSE	TRUE	FALSE	TRUE	FALSE	FALSE	FALSE	FALSE	FALSE	FALSE	FALSE	FALSE	Cytoplasm	2	5	CHEMBL3590106	ULIXERTINIB	FALSE	2	FALSE	Reactome	Cytokine Signaling in Immune system	4	0	0	2	3	0	911.5
MAPK3	ENSG00000102882	mitogen-activated protein kinase 3	899	4	FALSE	TRUE	FALSE	TRUE	FALSE	FALSE	FALSE	FALSE	FALSE	FALSE	FALSE	FALSE	Cytoplasm	2	5	CHEMBL3590106	ULIXERTINIB	FALSE	2	FALSE	Reactome	Cytokine Signaling in Immune system	4	0	0	2	3	0	911.5
MAPK3	ENSG00000102882	mitogen-activated protein kinase 3	899	4	FALSE	TRUE	FALSE	TRUE	FALSE	FALSE	FALSE	FALSE	FALSE	FALSE	FALSE	FALSE	Cytoplasm	2	5	CHEMBL4650285	TEMUTERKIB	FALSE	2	FALSE	Reactome	ISG15 antiviral mechanism	4	0	0	2	3	0	911.5
MAPK3	ENSG00000102882	mitogen-activated protein kinase 3	899	4	FALSE	TRUE	FALSE	TRUE	FALSE	FALSE	FALSE	FALSE	FALSE	FALSE	FALSE	FALSE	Cytoplasm	2	5	CHEMBL3590106	ULIXERTINIB	FALSE	2	FALSE	Reactome	Interferon Signaling	4	0	0	2	3	0	911.5
MAPK3	ENSG00000102882	mitogen-activated protein kinase 3	899	4	FALSE	TRUE	FALSE	TRUE	FALSE	FALSE	FALSE	FALSE	FALSE	FALSE	FALSE	FALSE	Cytoplasm	2	5	CHEMBL3545001	MK-8353	FALSE	1	FALSE	Reactome	ISG15 antiviral mechanism	4	0	0	2	3	0	911.5
MAPK3	ENSG00000102882	mitogen-activated protein kinase 3	899	4	FALSE	TRUE	FALSE	TRUE	FALSE	FALSE	FALSE	FALSE	FALSE	FALSE	FALSE	FALSE	Cytoplasm	2	5	CHEMBL3545001	MK-8353	FALSE	1	FALSE	Reactome	ISG15 antiviral mechanism	4	0	0	2	3	0	911.5
MAPK3	ENSG00000102882	mitogen-activated protein kinase 3	899	4	FALSE	TRUE	FALSE	TRUE	FALSE	FALSE	FALSE	FALSE	FALSE	FALSE	FALSE	FALSE	Cytoplasm	2	5	CHEMBL3590106	ULIXERTINIB	FALSE	2	FALSE	Reactome	ISG15 antiviral mechanism	4	0	0	2	3	0	911.5
MAPK3	ENSG00000102882	mitogen-activated protein kinase 3	899	4	FALSE	TRUE	FALSE	TRUE	FALSE	FALSE	FALSE	FALSE	FALSE	FALSE	FALSE	FALSE	Cytoplasm	2	5	CHEMBL3590106	ULIXERTINIB	FALSE	2	FALSE	KEGG	HIF-1 signaling pathway	4	0	0	2	3	0	911.5
MAPK3	ENSG00000102882	mitogen-activated protein kinase 3	899	4	FALSE	TRUE	FALSE	TRUE	FALSE	FALSE	FALSE	FALSE	FALSE	FALSE	FALSE	FALSE	Cytoplasm	2	5	CHEMBL3590106	ULIXERTINIB	FALSE	2	FALSE	Reactome	ISG15 antiviral mechanism	4	0	0	2	3	0	911.5
MAPK3	ENSG00000102882	mitogen-activated protein kinase 3	899	4	FALSE	TRUE	FALSE	TRUE	FALSE	FALSE	FALSE	FALSE	FALSE	FALSE	FALSE	FALSE	Cytoplasm	2	5	CHEMBL4650285	TEMUTERKIB	FALSE	2	FALSE	KEGG	HIF-1 signaling pathway	4	0	0	2	3	0	911.5
MAPK3	ENSG00000102882	mitogen-activated protein kinase 3	899	4	FALSE	TRUE	FALSE	TRUE	FALSE	FALSE	FALSE	FALSE	FALSE	FALSE	FALSE	FALSE	Cytoplasm	2	5	CHEMBL4650285	TEMUTERKIB	FALSE	2	FALSE	Reactome	Interferon Signaling	4	0	0	2	3	0	911.5
MAPK3	ENSG00000102882	mitogen-activated protein kinase 3	899	4	FALSE	TRUE	FALSE	TRUE	FALSE	FALSE	FALSE	FALSE	FALSE	FALSE	FALSE	FALSE	Cytoplasm	2	5	CHEMBL3590106	ULIXERTINIB	FALSE	2	FALSE	KEGG	HIF-1 signaling pathway	4	0	0	2	3	0	911.5
MAPK3	ENSG00000102882	mitogen-activated protein kinase 3	899	4	FALSE	TRUE	FALSE	TRUE	FALSE	FALSE	FALSE	FALSE	FALSE	FALSE	FALSE	FALSE	Cytoplasm	2	5	CHEMBL4650285	TEMUTERKIB	FALSE	2	FALSE	Reactome	Cytokine Signaling in Immune system	4	0	0	2	3	0	911.5
MAPK3	ENSG00000102882	mitogen-activated protein kinase 3	899	4	FALSE	TRUE	FALSE	TRUE	FALSE	FALSE	FALSE	FALSE	FALSE	FALSE	FALSE	FALSE	Cytoplasm	2	5	CHEMBL3590106	ULIXERTINIB	FALSE	2	FALSE	Reactome	Interferon Signaling	4	0	0	2	3	0	911.5
MAPK3	ENSG00000102882	mitogen-activated protein kinase 3	899	4	FALSE	TRUE	FALSE	TRUE	FALSE	FALSE	FALSE	FALSE	FALSE	FALSE	FALSE	FALSE	Cytoplasm	2	5	CHEMBL3590106	ULIXERTINIB	FALSE	2	FALSE	Reactome	Interferon Signaling	4	0	0	2	3	0	911.5
MAPK3	ENSG00000102882	mitogen-activated protein kinase 3	899	4	FALSE	TRUE	FALSE	TRUE	FALSE	FALSE	FALSE	FALSE	FALSE	FALSE	FALSE	FALSE	Cytoplasm	2	5	CHEMBL3590106	ULIXERTINIB	FALSE	2	FALSE	Reactome	Cytokine Signaling in Immune system	4	0	0	2	3	0	911.5
MAPK3	ENSG00000102882	mitogen-activated protein kinase 3	899	4	FALSE	TRUE	FALSE	TRUE	FALSE	FALSE	FALSE	FALSE	FALSE	FALSE	FALSE	FALSE	Cytoplasm	2	5	CHEMBL3590106	ULIXERTINIB	FALSE	2	FALSE	Reactome	ISG15 antiviral mechanism	4	0	0	2	3	0	911.5
MAPK3	ENSG00000102882	mitogen-activated protein kinase 3	899	4	FALSE	TRUE	FALSE	TRUE	FALSE	FALSE	FALSE	FALSE	FALSE	FALSE	FALSE	FALSE	Cytoplasm	2	5	CHEMBL4650285	TEMUTERKIB	FALSE	2	FALSE	KEGG	HIF-1 signaling pathway	4	0	0	2	3	0	911.5
MAPK3	ENSG00000102882	mitogen-activated protein kinase 3	899	4	FALSE	TRUE	FALSE	TRUE	FALSE	FALSE	FALSE	FALSE	FALSE	FALSE	FALSE	FALSE	Cytoplasm	2	5	CHEMBL4650285	TEMUTERKIB	FALSE	2	FALSE	Reactome	Interferon Signaling	4	0	0	2	3	0	911.5
MAPK3	ENSG00000102882	mitogen-activated protein kinase 3	899	4	FALSE	TRUE	FALSE	TRUE	FALSE	FALSE	FALSE	FALSE	FALSE	FALSE	FALSE	FALSE	Cytoplasm	2	5	CHEMBL3590106	ULIXERTINIB	FALSE	2	FALSE	Reactome	Interferon Signaling	4	0	0	2	3	0	911.5
MAPK3	ENSG00000102882	mitogen-activated protein kinase 3	899	4	FALSE	TRUE	FALSE	TRUE	FALSE	FALSE	FALSE	FALSE	FALSE	FALSE	FALSE	FALSE	Cytoplasm	2	5	CHEMBL3544964	RAVOXERTINIB	FALSE	1	FALSE	Reactome	Interferon Signaling	4	0	0	2	3	0	911.5
MAPK3	ENSG00000102882	mitogen-activated protein kinase 3	899	4	FALSE	TRUE	FALSE	TRUE	FALSE	FALSE	FALSE	FALSE	FALSE	FALSE	FALSE	FALSE	Cytoplasm	2	5	CHEMBL3590106	ULIXERTINIB	FALSE	2	FALSE	KEGG	HIF-1 signaling pathway	4	0	0	2	3	0	911.5
MAPK3	ENSG00000102882	mitogen-activated protein kinase 3	899	4	FALSE	TRUE	FALSE	TRUE	FALSE	FALSE	FALSE	FALSE	FALSE	FALSE	FALSE	FALSE	Cytoplasm	2	5	CHEMBL4650284	KO-947	FALSE	1	FALSE	Reactome	Cytokine Signaling in Immune system	4	0	0	2	3	0	911.5
MAPK3	ENSG00000102882	mitogen-activated protein kinase 3	899	4	FALSE	TRUE	FALSE	TRUE	FALSE	FALSE	FALSE	FALSE	FALSE	FALSE	FALSE	FALSE	Cytoplasm	2	5	CHEMBL3544964	RAVOXERTINIB	FALSE	1	FALSE	Reactome	ISG15 antiviral mechanism	4	0	0	2	3	0	911.5
MAPK3	ENSG00000102882	mitogen-activated protein kinase 3	899	4	FALSE	TRUE	FALSE	TRUE	FALSE	FALSE	FALSE	FALSE	FALSE	FALSE	FALSE	FALSE	Cytoplasm	2	5	CHEMBL3590106	ULIXERTINIB	FALSE	2	FALSE	Reactome	Interferon Signaling	4	0	0	2	3	0	911.5
MAPK3	ENSG00000102882	mitogen-activated protein kinase 3	899	4	FALSE	TRUE	FALSE	TRUE	FALSE	FALSE	FALSE	FALSE	FALSE	FALSE	FALSE	FALSE	Cytoplasm	2	5	CHEMBL3590106	ULIXERTINIB	FALSE	2	FALSE	Reactome	Cytokine Signaling in Immune system	4	0	0	2	3	0	911.5
MAPK3	ENSG00000102882	mitogen-activated protein kinase 3	899	4	FALSE	TRUE	FALSE	TRUE	FALSE	FALSE	FALSE	FALSE	FALSE	FALSE	FALSE	FALSE	Cytoplasm	2	5	CHEMBL4650285	TEMUTERKIB	FALSE	2	FALSE	Reactome	Interferon Signaling	4	0	0	2	3	0	911.5
MAPK3	ENSG00000102882	mitogen-activated protein kinase 3	899	4	FALSE	TRUE	FALSE	TRUE	FALSE	FALSE	FALSE	FALSE	FALSE	FALSE	FALSE	FALSE	Cytoplasm	2	5	CHEMBL4650285	TEMUTERKIB	FALSE	2	FALSE	Reactome	ISG15 antiviral mechanism	4	0	0	2	3	0	911.5
MAPK3	ENSG00000102882	mitogen-activated protein kinase 3	899	4	FALSE	TRUE	FALSE	TRUE	FALSE	FALSE	FALSE	FALSE	FALSE	FALSE	FALSE	FALSE	Cytoplasm	2	5	CHEMBL3545001	MK-8353	FALSE	1	FALSE	Reactome	Cytokine Signaling in Immune system	4	0	0	2	3	0	911.5
MAPK3	ENSG00000102882	mitogen-activated protein kinase 3	899	4	FALSE	TRUE	FALSE	TRUE	FALSE	FALSE	FALSE	FALSE	FALSE	FALSE	FALSE	FALSE	Cytoplasm	2	5	CHEMBL3545001	MK-8353	FALSE	1	FALSE	Reactome	Cytokine Signaling in Immune system	4	0	0	2	3	0	911.5
MAPK3	ENSG00000102882	mitogen-activated protein kinase 3	899	4	FALSE	TRUE	FALSE	TRUE	FALSE	FALSE	FALSE	FALSE	FALSE	FALSE	FALSE	FALSE	Cytoplasm	2	5	CHEMBL4650285	TEMUTERKIB	FALSE	2	FALSE	Reactome	Interferon Signaling	4	0	0	2	3	0	911.5
MAPK3	ENSG00000102882	mitogen-activated protein kinase 3	899	4	FALSE	TRUE	FALSE	TRUE	FALSE	FALSE	FALSE	FALSE	FALSE	FALSE	FALSE	FALSE	Cytoplasm	2	5	CHEMBL3545001	MK-8353	FALSE	1	FALSE	Reactome	Cytokine Signaling in Immune system	4	0	0	2	3	0	911.5
IL1A	ENSG00000115008	interleukin 1 alpha	893	2	FALSE	FALSE	FALSE	FALSE	FALSE	TRUE	FALSE	FALSE	FALSE	FALSE	FALSE	FALSE	Nucleus	1	2	CHEMBL4594518	LUTIKIZUMAB	FALSE	2	FALSE	Reactome	Cytokine Signaling in Immune system	1	0	1	1	0	0	898.5
IL1A	ENSG00000115008	interleukin 1 alpha	893	2	FALSE	FALSE	FALSE	FALSE	FALSE	TRUE	FALSE	FALSE	FALSE	FALSE	FALSE	FALSE	Nucleus	1	2	CHEMBL2109653	BERMEKIMAB	FALSE	3	FALSE	Reactome	Cytokine Signaling in Immune system	1	0	1	1	0	0	898.5
IL1A	ENSG00000115008	interleukin 1 alpha	893	2	FALSE	FALSE	FALSE	FALSE	FALSE	TRUE	FALSE	FALSE	FALSE	FALSE	FALSE	FALSE	Nucleus	1	2	CHEMBL2109653	BERMEKIMAB	FALSE	3	FALSE	Reactome	Cytokine Signaling in Immune system	1	0	1	1	0	0	898.5
IL1A	ENSG00000115008	interleukin 1 alpha	893	2	FALSE	FALSE	FALSE	FALSE	FALSE	TRUE	FALSE	FALSE	FALSE	FALSE	FALSE	FALSE	Nucleus	1	2	CHEMBL4594518	LUTIKIZUMAB	FALSE	2	FALSE	Reactome	Cytokine Signaling in Immune system	1	0	1	1	0	0	898.5
IL1A	ENSG00000115008	interleukin 1 alpha	893	2	FALSE	FALSE	FALSE	FALSE	FALSE	TRUE	FALSE	FALSE	FALSE	FALSE	FALSE	FALSE	Nucleus	1	2	CHEMBL4594518	LUTIKIZUMAB	FALSE	2	FALSE	Reactome	Cytokine Signaling in Immune system	1	0	1	1	0	0	898.5
IL1A	ENSG00000115008	interleukin 1 alpha	893	2	FALSE	FALSE	FALSE	FALSE	FALSE	TRUE	FALSE	FALSE	FALSE	FALSE	FALSE	FALSE	Nucleus	1	2	CHEMBL2109653	BERMEKIMAB	FALSE	3	FALSE	Reactome	Cytokine Signaling in Immune system	1	0	1	1	0	0	898.5
IL1A	ENSG00000115008	interleukin 1 alpha	893	2	FALSE	FALSE	FALSE	FALSE	FALSE	TRUE	FALSE	FALSE	FALSE	FALSE	FALSE	FALSE	Nucleus	1	2	CHEMBL2109653	BERMEKIMAB	FALSE	3	FALSE	Reactome	Cytokine Signaling in Immune system	1	0	1	1	0	0	898.5
IL1A	ENSG00000115008	interleukin 1 alpha	893	2	FALSE	FALSE	FALSE	FALSE	FALSE	TRUE	FALSE	FALSE	FALSE	FALSE	FALSE	FALSE	Nucleus	1	2	CHEMBL2109653	BERMEKIMAB	FALSE	3	FALSE	Reactome	Cytokine Signaling in Immune system	1	0	1	1	0	0	898.5
IL1A	ENSG00000115008	interleukin 1 alpha	893	2	FALSE	FALSE	FALSE	FALSE	FALSE	TRUE	FALSE	FALSE	FALSE	FALSE	FALSE	FALSE	Nucleus	1	2	CHEMBL2109653	BERMEKIMAB	FALSE	3	FALSE	Reactome	Cytokine Signaling in Immune system	1	0	1	1	0	0	898.5
IL1A	ENSG00000115008	interleukin 1 alpha	893	2	FALSE	FALSE	FALSE	FALSE	FALSE	TRUE	FALSE	FALSE	FALSE	FALSE	FALSE	FALSE	Nucleus	1	2	CHEMBL2109653	BERMEKIMAB	FALSE	3	FALSE	Reactome	Cytokine Signaling in Immune system	1	0	1	1	0	0	898.5
IL1A	ENSG00000115008	interleukin 1 alpha	893	2	FALSE	FALSE	FALSE	FALSE	FALSE	TRUE	FALSE	FALSE	FALSE	FALSE	FALSE	FALSE	Nucleus	1	2	CHEMBL2109653	BERMEKIMAB	FALSE	3	FALSE	Reactome	Cytokine Signaling in Immune system	1	0	1	1	0	0	898.5
IL1A	ENSG00000115008	interleukin 1 alpha	893	2	FALSE	FALSE	FALSE	FALSE	FALSE	TRUE	FALSE	FALSE	FALSE	FALSE	FALSE	FALSE	Nucleus	1	2	CHEMBL2109653	BERMEKIMAB	FALSE	3	FALSE	Reactome	Cytokine Signaling in Immune system	1	0	1	1	0	0	898.5
IL1A	ENSG00000115008	interleukin 1 alpha	893	2	FALSE	FALSE	FALSE	FALSE	FALSE	TRUE	FALSE	FALSE	FALSE	FALSE	FALSE	FALSE	Nucleus	1	2	CHEMBL2109653	BERMEKIMAB	FALSE	3	FALSE	Reactome	Cytokine Signaling in Immune system	1	0	1	1	0	0	898.5
IL1A	ENSG00000115008	interleukin 1 alpha	893	2	FALSE	FALSE	FALSE	FALSE	FALSE	TRUE	FALSE	FALSE	FALSE	FALSE	FALSE	FALSE	Nucleus	1	2	CHEMBL2109653	BERMEKIMAB	FALSE	3	FALSE	Reactome	Cytokine Signaling in Immune system	1	0	1	1	0	0	898.5
IL1A	ENSG00000115008	interleukin 1 alpha	893	2	FALSE	FALSE	FALSE	FALSE	FALSE	TRUE	FALSE	FALSE	FALSE	FALSE	FALSE	FALSE	Nucleus	1	2	CHEMBL4594518	LUTIKIZUMAB	FALSE	2	FALSE	Reactome	Cytokine Signaling in Immune system	1	0	1	1	0	0	898.5
IL1A	ENSG00000115008	interleukin 1 alpha	893	2	FALSE	FALSE	FALSE	FALSE	FALSE	TRUE	FALSE	FALSE	FALSE	FALSE	FALSE	FALSE	Nucleus	1	2	CHEMBL2109653	BERMEKIMAB	FALSE	3	FALSE	Reactome	Cytokine Signaling in Immune system	1	0	1	1	0	0	898.5
IL1A	ENSG00000115008	interleukin 1 alpha	893	2	FALSE	FALSE	FALSE	FALSE	FALSE	TRUE	FALSE	FALSE	FALSE	FALSE	FALSE	FALSE	Nucleus	1	2	CHEMBL2109653	BERMEKIMAB	FALSE	3	FALSE	Reactome	Cytokine Signaling in Immune system	1	0	1	1	0	0	898.5
PGR	ENSG00000082175	progesterone receptor	846	5	TRUE	FALSE	FALSE	TRUE	FALSE	FALSE	FALSE	FALSE	FALSE	FALSE	FALSE	FALSE	Nucleus	4	26	CHEMBL1389	LEVONORGESTREL	TRUE	4	FALSE	Reactome	SUMO E3 ligases SUMOylate target proteins	2	9	0	0	0	9	898
PGR	ENSG00000082175	progesterone receptor	846	5	TRUE	FALSE	FALSE	TRUE	FALSE	FALSE	FALSE	FALSE	FALSE	FALSE	FALSE	FALSE	Nucleus	4	26	CHEMBL1389	LEVONORGESTREL	TRUE	4	FALSE	Reactome	SUMO E3 ligases SUMOylate target proteins	2	9	0	0	0	9	898
PGR	ENSG00000082175	progesterone receptor	846	5	TRUE	FALSE	FALSE	TRUE	FALSE	FALSE	FALSE	FALSE	FALSE	FALSE	FALSE	FALSE	Nucleus	4	26	CHEMBL1389	LEVONORGESTREL	TRUE	4	FALSE	Reactome	SUMO E3 ligases SUMOylate target proteins	2	9	0	0	0	9	898
PGR	ENSG00000082175	progesterone receptor	846	5	TRUE	FALSE	FALSE	TRUE	FALSE	FALSE	FALSE	FALSE	FALSE	FALSE	FALSE	FALSE	Nucleus	4	26	CHEMBL1201139	MEGESTROL ACETATE	TRUE	4	FALSE	Reactome	SUMOylation	2	9	0	0	0	9	898
PGR	ENSG00000082175	progesterone receptor	846	5	TRUE	FALSE	FALSE	TRUE	FALSE	FALSE	FALSE	FALSE	FALSE	FALSE	FALSE	FALSE	Nucleus	4	26	CHEMBL717	MEDROXYPROGESTERONE ACETATE	TRUE	4	FALSE	Reactome	SUMO E3 ligases SUMOylate target proteins	2	9	0	0	0	9	898
PGR	ENSG00000082175	progesterone receptor	846	5	TRUE	FALSE	FALSE	TRUE	FALSE	FALSE	FALSE	FALSE	FALSE	FALSE	FALSE	FALSE	Nucleus	4	26	CHEMBL1201139	MEGESTROL ACETATE	TRUE	4	FALSE	Reactome	SUMOylation	2	9	0	0	0	9	898
PGR	ENSG00000082175	progesterone receptor	846	5	TRUE	FALSE	FALSE	TRUE	FALSE	FALSE	FALSE	FALSE	FALSE	FALSE	FALSE	FALSE	Nucleus	4	26	CHEMBL1200934	NORGESTIMATE	TRUE	4	FALSE	Reactome	SUMOylation	2	9	0	0	0	9	898
PGR	ENSG00000082175	progesterone receptor	846	5	TRUE	FALSE	FALSE	TRUE	FALSE	FALSE	FALSE	FALSE	FALSE	FALSE	FALSE	FALSE	Nucleus	4	26	CHEMBL1276308	MIFEPRISTONE	TRUE	4	FALSE	Reactome	SUMOylation	2	9	0	0	0	9	898
PGR	ENSG00000082175	progesterone receptor	846	5	TRUE	FALSE	FALSE	TRUE	FALSE	FALSE	FALSE	FALSE	FALSE	FALSE	FALSE	FALSE	Nucleus	4	26	CHEMBL103	PROGESTERONE	TRUE	4	FALSE	Reactome	SUMO E3 ligases SUMOylate target proteins	2	9	0	0	0	9	898
PGR	ENSG00000082175	progesterone receptor	846	5	TRUE	FALSE	FALSE	TRUE	FALSE	FALSE	FALSE	FALSE	FALSE	FALSE	FALSE	FALSE	Nucleus	4	26	CHEMBL1276308	MIFEPRISTONE	TRUE	4	FALSE	Reactome	SUMOylation	2	9	0	0	0	9	898
PGR	ENSG00000082175	progesterone receptor	846	5	TRUE	FALSE	FALSE	TRUE	FALSE	FALSE	FALSE	FALSE	FALSE	FALSE	FALSE	FALSE	Nucleus	4	26	CHEMBL103	PROGESTERONE	TRUE	4	FALSE	Reactome	SUMO E3 ligases SUMOylate target proteins	2	9	0	0	0	9	898
PGR	ENSG00000082175	progesterone receptor	846	5	TRUE	FALSE	FALSE	TRUE	FALSE	FALSE	FALSE	FALSE	FALSE	FALSE	FALSE	FALSE	Nucleus	4	26	CHEMBL103	PROGESTERONE	TRUE	4	FALSE	Reactome	SUMO E3 ligases SUMOylate target proteins	2	9	0	0	0	9	898
[truncated: 36,024 more rows]
