# Supplementary material for: Pathway2Targets: an open-source pathway-based approach to repurpose therapeutic drugs and prioritize human targets
Source: PeerJ. 2023 Sep 29;11:e16088. doi: 10.7717/peerj.16088 (PMC10544355; doi:10.7717/peerj.16088)
Supplement: Supplemental Information 6 [file peerj-11-16088-s006.xlsx]

## Sheet: SuppTable4-CRC_RankedTargetsEar
Target_Symbol	Target_ID	Target_Name	Associated_Disease_Count	Tractability_Count	sm_approved	sm_advancedClinical	sm_phase1	ab_approved	ab_advancedClinical	ab_phase1	pr_approved	pr_advancedClinical	pr_phase1	oc_approved	oc_advancedClinical	oc_phase1	Subcellular_Location	Safety_Liabilities	Number_Unique_Drugs	Target_in_Pathways	num_Approved_Drugs	num_Phase3	num_Phase2	num_Phase1	num_Phase4	Weighted_Score
EGFR	ENSG00000146648	epidermal growth factor receptor	1729	7	TRUE	FALSE	FALSE	TRUE	TRUE	FALSE	FALSE	FALSE	FALSE	FALSE	TRUE	FALSE	Cell membrane	2	72	1	14	2	0	0	14	61.43
MAPK14	ENSG00000112062	mitogen-activated protein kinase 14	462	5	FALSE	TRUE	FALSE	TRUE	FALSE	FALSE	FALSE	FALSE	FALSE	FALSE	FALSE	FALSE	Cytoplasm	0	21	3	0	2	10	0	0	60.12
RPS6KB1	ENSG00000108443	ribosomal protein S6 kinase B1	439	5	FALSE	FALSE	TRUE	TRUE	FALSE	FALSE	FALSE	FALSE	FALSE	FALSE	FALSE	FALSE	Synapse	0	5	1	0	0	0	5	0	59.89
MTOR	ENSG00000198793	mechanistic target of rapamycin kinase	1493	5	TRUE	FALSE	FALSE	TRUE	FALSE	FALSE	FALSE	FALSE	FALSE	FALSE	FALSE	FALSE	Endoplasmic reticulum membrane	1	25	3	1	2	6	0	1	54.94
PIK3R1	ENSG00000145675	phosphoinositide-3-kinase regulatory subunit 1	553	5	FALSE	TRUE	FALSE	TRUE	FALSE	FALSE	FALSE	FALSE	FALSE	FALSE	FALSE	FALSE	Cytosol	0	24	2	0	3	8	0	0	54.53
TP53	ENSG00000141510	tumor protein p53	2433	5	FALSE	TRUE	FALSE	TRUE	FALSE	FALSE	FALSE	FALSE	FALSE	FALSE	TRUE	FALSE	Cytoplasm	2	8	9	0	3	5	0	0	52.83
AURKB	ENSG00000178999	aurora kinase B	240	4	FALSE	TRUE	FALSE	TRUE	FALSE	FALSE	FALSE	FALSE	FALSE	FALSE	FALSE	FALSE	Nucleus	1	18	9	0	2	6	1	0	50.9
PIK3R2	ENSG00000105647	phosphoinositide-3-kinase regulatory subunit 2	179	2	FALSE	TRUE	FALSE	FALSE	FALSE	FALSE	FALSE	FALSE	FALSE	FALSE	FALSE	FALSE	No data	0	24	2	0	3	8	0	0	49.29
CD40	ENSG00000101017	CD40 molecule	713	1	FALSE	FALSE	FALSE	FALSE	FALSE	TRUE	FALSE	FALSE	FALSE	FALSE	TRUE	FALSE	[Isoform I]: Cell membrane	1	9	1	0	0	7	1	0	48.63
MAPK3	ENSG00000102882	mitogen-activated protein kinase 3	810	4	FALSE	TRUE	FALSE	TRUE	FALSE	FALSE	FALSE	FALSE	FALSE	FALSE	FALSE	FALSE	Cytoplasm	2	5	4	0	0	2	3	0	48.6
PLK1	ENSG00000166851	polo like kinase 1	280	5	FALSE	TRUE	FALSE	TRUE	FALSE	FALSE	FALSE	FALSE	FALSE	FALSE	FALSE	FALSE	Nucleus	1	7	6	0	1	2	3	0	48.3
TUBB4A	ENSG00000104833	tubulin beta 4A class IVa	719	4	TRUE	FALSE	FALSE	TRUE	TRUE	FALSE	FALSE	FALSE	FALSE	FALSE	TRUE	FALSE	Cytoplasm	0	59	2	10	0	0	0	10	44.79
RPS6KB2	ENSG00000175634	ribosomal protein S6 kinase B2	62	3	FALSE	FALSE	TRUE	TRUE	FALSE	FALSE	FALSE	FALSE	FALSE	FALSE	FALSE	FALSE	Cytoplasm	0	4	1	0	0	0	4	0	44.62
CCR2	ENSG00000121807	C-C motif chemokine receptor 2	752	6	FALSE	TRUE	FALSE	TRUE	FALSE	TRUE	FALSE	FALSE	FALSE	FALSE	TRUE	FALSE	Cell membrane	0	10	1	0	1	7	0	0	44.52
MAPK1	ENSG00000100030	mitogen-activated protein kinase 1	442	5	FALSE	TRUE	FALSE	TRUE	FALSE	FALSE	FALSE	FALSE	FALSE	FALSE	FALSE	FALSE	Cytoplasm	2	5	2	0	0	2	3	0	44.42
CHEK1	ENSG00000149554	checkpoint kinase 1	283	5	FALSE	TRUE	FALSE	TRUE	FALSE	FALSE	FALSE	FALSE	FALSE	FALSE	FALSE	FALSE	Nucleus	0	10	8	0	0	5	1	0	44.33
CDK5	ENSG00000164885	cyclin dependent kinase 5	230	6	FALSE	TRUE	FALSE	TRUE	FALSE	FALSE	FALSE	FALSE	FALSE	FALSE	FALSE	FALSE	[Isoform 1]: Cytoplasm	0	7	2	0	1	3	2	0	42.3
TUBB4B	ENSG00000188229	tubulin beta 4B class IVb	413	4	TRUE	FALSE	FALSE	TRUE	TRUE	FALSE	FALSE	FALSE	FALSE	FALSE	TRUE	FALSE	Cytoplasm	0	59	2	10	0	0	0	10	41.73
PIK3R3	ENSG00000117461	phosphoinositide-3-kinase regulatory subunit 3	172	2	FALSE	TRUE	FALSE	FALSE	FALSE	FALSE	FALSE	FALSE	FALSE	FALSE	FALSE	FALSE	Vesicles	0	24	2	0	3	6	0	0	41.22
NR1H2	ENSG00000131408	nuclear receptor subfamily 1 group H member 2	128	5	FALSE	FALSE	TRUE	TRUE	FALSE	FALSE	FALSE	FALSE	FALSE	FALSE	FALSE	FALSE	Nucleus	3	4	2	0	0	0	4	0	40.78
ERBB2	ENSG00000141736	erb-b2 receptor tyrosine kinase 2	1110	7	TRUE	FALSE	FALSE	TRUE	TRUE	FALSE	FALSE	FALSE	FALSE	FALSE	TRUE	FALSE	Cell membrane	1	42	1	12	1	0	0	12	40.72
PIK3CA	ENSG00000121879	phosphatidylinositol-4,5-bisphosphate 3-kinase catalytic subunit alpha	900	5	TRUE	FALSE	FALSE	TRUE	FALSE	FALSE	FALSE	FALSE	FALSE	FALSE	FALSE	FALSE	Cytosol	2	32	2	3	3	3	0	3	39.53
PIK3CB	ENSG00000051382	phosphatidylinositol-4,5-bisphosphate 3-kinase catalytic subunit beta	486	3	FALSE	TRUE	FALSE	TRUE	FALSE	FALSE	FALSE	FALSE	FALSE	FALSE	FALSE	FALSE	Cytoplasm	0	29	2	0	3	4	0	0	39.36
AURKA	ENSG00000087586	aurora kinase A	327	5	FALSE	TRUE	FALSE	TRUE	FALSE	FALSE	FALSE	FALSE	FALSE	FALSE	FALSE	FALSE	Cytoplasm	2	19	7	0	1	6	0	0	39.27
IFNG	ENSG00000111537	interferon gamma	1875	3	FALSE	FALSE	FALSE	FALSE	TRUE	FALSE	FALSE	FALSE	FALSE	FALSE	FALSE	FALSE	Secreted	0	3	3	1	0	1	1	1	37.76
SYK	ENSG00000165025	spleen associated tyrosine kinase	527	6	TRUE	FALSE	FALSE	TRUE	FALSE	FALSE	FALSE	FALSE	FALSE	FALSE	FALSE	FALSE	Cell membrane	1	12	1	2	0	3	1	2	35.79
CDK12	ENSG00000167258	cyclin dependent kinase 12	316	4	FALSE	TRUE	FALSE	TRUE	FALSE	FALSE	FALSE	FALSE	FALSE	FALSE	FALSE	FALSE	Nucleus	0	4	1	0	0	2	2	0	35.66
FLT3	ENSG00000122025	fms related receptor tyrosine kinase 3	692	6	TRUE	FALSE	FALSE	TRUE	FALSE	FALSE	FALSE	FALSE	FALSE	FALSE	TRUE	FALSE	Membrane	0	39	1	11	0	0	0	11	35.53
CDK2	ENSG00000123374	cyclin dependent kinase 2	454	5	FALSE	TRUE	FALSE	TRUE	FALSE	FALSE	FALSE	FALSE	FALSE	FALSE	FALSE	FALSE	Cytoplasm	3	14	12	0	2	5	0	0	35.04
CD40LG	ENSG00000102245	CD40 ligand	1702	4	FALSE	FALSE	FALSE	FALSE	FALSE	TRUE	FALSE	FALSE	FALSE	FALSE	TRUE	FALSE	Cell membrane	0	5	1	0	2	3	0	0	35.02
PIM1	ENSG00000137193	Pim-1 proto-oncogene, serine/threonine kinase	237	5	FALSE	FALSE	TRUE	TRUE	FALSE	FALSE	FALSE	FALSE	FALSE	FALSE	FALSE	FALSE	[Isoform 1]: Cytoplasm	1	3	1	0	0	0	3	0	34.87
CD4	ENSG00000010610	CD4 molecule	2010	3	FALSE	FALSE	FALSE	FALSE	TRUE	FALSE	FALSE	FALSE	FALSE	FALSE	TRUE	FALSE	Cell membrane	0	5	2	1	2	2	0	1	34.61
CDK1	ENSG00000170312	cyclin dependent kinase 1	310	4	FALSE	TRUE	FALSE	TRUE	FALSE	FALSE	FALSE	FALSE	FALSE	FALSE	FALSE	FALSE	Nucleus	0	12	13	0	2	4	0	0	34.6
FN1	ENSG00000115414	fibronectin 1	995	4	FALSE	FALSE	FALSE	FALSE	FALSE	TRUE	FALSE	FALSE	FALSE	TRUE	FALSE	FALSE	Secreted	0	5	1	1	1	2	1	1	33.96
PIK3CD	ENSG00000171608	phosphatidylinositol-4,5-bisphosphate 3-kinase catalytic subunit delta	396	4	TRUE	FALSE	FALSE	TRUE	FALSE	FALSE	FALSE	FALSE	FALSE	FALSE	FALSE	FALSE	Cytoplasm	0	45	2	6	2	0	0	6	33.52
CDK13	ENSG00000065883	cyclin dependent kinase 13	76	4	FALSE	TRUE	FALSE	TRUE	FALSE	FALSE	FALSE	FALSE	FALSE	FALSE	FALSE	FALSE	Nucleus speckle	0	4	1	0	0	2	2	0	33.26
IGF1R	ENSG00000140443	insulin like growth factor 1 receptor	733	7	FALSE	TRUE	FALSE	TRUE	TRUE	FALSE	FALSE	FALSE	FALSE	TRUE	FALSE	FALSE	Cell membrane	1	18	1	2	3	3	0	2	32.85
ROCK2	ENSG00000134318	Rho associated coiled-coil containing protein kinase 2	259	4	TRUE	FALSE	FALSE	TRUE	FALSE	FALSE	FALSE	FALSE	FALSE	FALSE	FALSE	FALSE	Cytoplasm	1	13	1	4	1	5	0	4	32.13
FLT1	ENSG00000102755	fms related receptor tyrosine kinase 1	656	6	TRUE	FALSE	FALSE	TRUE	FALSE	TRUE	FALSE	FALSE	FALSE	FALSE	TRUE	FALSE	[Isoform 1]: Cell membrane	3	45	1	9	0	0	0	9	31.15
TFRC	ENSG00000072274	transferrin receptor	688	3	FALSE	FALSE	FALSE	FALSE	FALSE	FALSE	FALSE	FALSE	FALSE	FALSE	TRUE	FALSE	Cell membrane	0	3	1	0	1	0	2	0	30.88
VEGFA	ENSG00000112715	vascular endothelial growth factor A	2082	5	FALSE	FALSE	FALSE	FALSE	TRUE	FALSE	FALSE	FALSE	FALSE	TRUE	FALSE	FALSE	Secreted	1	11	2	4	1	0	0	4	30.36
AKT1	ENSG00000142208	AKT serine/threonine kinase 1	1480	6	FALSE	TRUE	FALSE	TRUE	FALSE	FALSE	FALSE	FALSE	FALSE	FALSE	FALSE	FALSE	Cytoplasm	4	14	9	0	2	2	0	0	30.3
CD3E	ENSG00000198851	CD3 epsilon subunit of T-cell receptor complex	219	3	FALSE	FALSE	FALSE	FALSE	TRUE	FALSE	FALSE	FALSE	FALSE	FALSE	FALSE	FALSE	Cell membrane	0	18	2	3	6	3	0	3	30.22
NR1H3	ENSG00000025434	nuclear receptor subfamily 1 group H member 3	289	5	FALSE	FALSE	TRUE	TRUE	FALSE	FALSE	FALSE	FALSE	FALSE	FALSE	FALSE	FALSE	Nucleus	4	3	2	0	0	0	3	0	29.89
TNFRSF10B	ENSG00000120889	TNF receptor superfamily member 10b	285	1	FALSE	FALSE	FALSE	FALSE	FALSE	TRUE	FALSE	FALSE	FALSE	FALSE	TRUE	FALSE	Membrane	0	5	1	0	1	3	1	0	28.85
CD70	ENSG00000125726	CD70 molecule	205	1	FALSE	FALSE	FALSE	FALSE	FALSE	TRUE	FALSE	FALSE	FALSE	FALSE	FALSE	FALSE	Membrane	0	3	1	0	0	1	2	0	28.55
APP	ENSG00000142192	amyloid beta precursor protein	690	7	FALSE	TRUE	FALSE	TRUE	TRUE	FALSE	FALSE	FALSE	FALSE	FALSE	TRUE	FALSE	Cell membrane	0	11	1	1	7	2	0	1	28.41
CD3G	ENSG00000160654	CD3 gamma subunit of T-cell receptor complex	143	3	FALSE	FALSE	FALSE	FALSE	TRUE	FALSE	FALSE	FALSE	FALSE	FALSE	FALSE	FALSE	Cell membrane	0	11	2	2	3	4	0	2	27.95
IL6	ENSG00000136244	interleukin 6	2249	4	FALSE	FALSE	FALSE	FALSE	TRUE	FALSE	FALSE	FALSE	FALSE	FALSE	FALSE	FALSE	Secreted	2	8	2	1	3	0	0	1	27.5
CDC7	ENSG00000097046	cell division cycle 7	119	4	FALSE	TRUE	FALSE	TRUE	FALSE	FALSE	FALSE	FALSE	FALSE	FALSE	FALSE	FALSE	Nucleus	0	4	8	0	0	2	1	0	27.19
RPS27A	ENSG00000143947	ribosomal protein S27a	67	4	TRUE	FALSE	FALSE	FALSE	FALSE	FALSE	FALSE	FALSE	FALSE	FALSE	TRUE	FALSE	[Ubiquitin]: Cytoplasm	0	3	29	1	0	2	0	1	27.18
IL18	ENSG00000150782	interleukin 18	947	2	FALSE	FALSE	FALSE	FALSE	FALSE	TRUE	FALSE	FALSE	FALSE	FALSE	TRUE	FALSE	Cytoplasm	0	3	1	0	1	1	1	0	26.97
TOP2A	ENSG00000131747	DNA topoisomerase II alpha	534	6	TRUE	FALSE	FALSE	TRUE	FALSE	TRUE	FALSE	FALSE	FALSE	FALSE	FALSE	FALSE	Cytoplasm	0	24	4	9	0	0	0	9	26.93
RPL17	ENSG00000265681	ribosomal protein L17	927	4	TRUE	FALSE	FALSE	FALSE	FALSE	FALSE	FALSE	FALSE	FALSE	FALSE	TRUE	FALSE	Cytoplasm	0	3	11	1	0	2	0	1	26.78
IL13	ENSG00000169194	interleukin 13	797	2	FALSE	FALSE	FALSE	FALSE	FALSE	TRUE	FALSE	FALSE	FALSE	FALSE	FALSE	FALSE	Secreted	0	7	1	0	3	3	0	0	26.47
TNFRSF4	ENSG00000186827	TNF receptor superfamily member 4	241	1	FALSE	FALSE	FALSE	FALSE	FALSE	TRUE	FALSE	FALSE	FALSE	FALSE	TRUE	FALSE	Membrane	0	5	1	0	0	5	0	0	25.91
HSP90AA1	ENSG00000080824	heat shock protein 90 alpha family class A member 1	514	6	FALSE	TRUE	FALSE	TRUE	FALSE	FALSE	FALSE	FALSE	FALSE	FALSE	TRUE	FALSE	Nucleus	0	10	3	0	5	2	0	0	25.14
JAK2	ENSG00000096968	Janus kinase 2	953	5	TRUE	FALSE	FALSE	TRUE	FALSE	FALSE	FALSE	FALSE	FALSE	FALSE	FALSE	FALSE	Endomembrane system	2	23	3	8	0	0	0	8	25.11
MUC1	ENSG00000185499	mucin 1, cell surface associated	805	4	FALSE	FALSE	FALSE	FALSE	FALSE	TRUE	FALSE	FALSE	FALSE	FALSE	TRUE	FALSE	Apical cell membrane	0	4	1	0	1	3	0	0	25.05
CHEK2	ENSG00000183765	checkpoint kinase 2	454	5	FALSE	TRUE	FALSE	TRUE	FALSE	FALSE	FALSE	FALSE	FALSE	FALSE	FALSE	FALSE	[Isoform 2]: Nucleus	0	2	6	0	0	1	1	0	25.04
MAPK8	ENSG00000107643	mitogen-activated protein kinase 8	767	5	FALSE	TRUE	FALSE	TRUE	FALSE	FALSE	FALSE	FALSE	FALSE	FALSE	FALSE	FALSE	Cytoplasm	0	3	2	0	0	3	0	0	24.67
IL3RA	ENSG00000185291	interleukin 3 receptor subunit alpha	194	2	FALSE	FALSE	FALSE	FALSE	FALSE	TRUE	FALSE	FALSE	FALSE	TRUE	FALSE	FALSE	Membrane	0	4	1	1	0	2	1	1	23.95
CXCL8	ENSG00000169429	C-X-C motif chemokine ligand 8	1382	5	FALSE	FALSE	FALSE	TRUE	FALSE	TRUE	FALSE	FALSE	FALSE	FALSE	FALSE	FALSE	Secreted	1	2	1	0	0	2	0	0	23.82
ABL1	ENSG00000097007	ABL proto-oncogene 1, non-receptor tyrosine kinase	700	5	TRUE	FALSE	FALSE	TRUE	FALSE	FALSE	FALSE	FALSE	FALSE	FALSE	FALSE	FALSE	Cytoplasm	2	24	2	8	2	0	0	8	23.58
VDR	ENSG00000111424	vitamin D receptor	937	5	TRUE	FALSE	FALSE	TRUE	FALSE	FALSE	FALSE	FALSE	FALSE	FALSE	FALSE	FALSE	Nucleus	1	17	2	8	0	0	0	8	23.45
CDK9	ENSG00000136807	cyclin dependent kinase 9	235	5	FALSE	TRUE	FALSE	TRUE	FALSE	FALSE	FALSE	FALSE	FALSE	FALSE	FALSE	FALSE	Nucleus	0	10	1	0	2	3	0	0	23.35
IGF1	ENSG00000017427	insulin like growth factor 1	1409	3	FALSE	FALSE	FALSE	FALSE	FALSE	TRUE	FALSE	FALSE	FALSE	FALSE	FALSE	FALSE	Secreted	1	2	1	0	0	2	0	0	23.09
JAK1	ENSG00000162434	Janus kinase 1	641	4	TRUE	FALSE	FALSE	TRUE	FALSE	FALSE	FALSE	FALSE	FALSE	FALSE	FALSE	FALSE	Endomembrane system	0	19	3	7	0	0	0	7	22.98
CD3D	ENSG00000167286	CD3 delta subunit of T-cell receptor complex	141	1	FALSE	FALSE	FALSE	FALSE	TRUE	FALSE	FALSE	FALSE	FALSE	FALSE	FALSE	FALSE	Cell membrane	0	11	2	2	3	3	0	2	22.93
IL1B	ENSG00000125538	interleukin 1 beta	1670	4	FALSE	FALSE	FALSE	FALSE	TRUE	FALSE	FALSE	FALSE	FALSE	TRUE	FALSE	FALSE	Cytoplasm	0	4	1	2	1	0	0	2	22.72
CDK4	ENSG00000135446	cyclin dependent kinase 4	708	5	TRUE	FALSE	FALSE	TRUE	FALSE	FALSE	FALSE	FALSE	FALSE	FALSE	FALSE	FALSE	Cytoplasm	0	17	3	6	0	0	0	6	22.64
MDM2	ENSG00000135679	MDM2 proto-oncogene	753	5	FALSE	TRUE	FALSE	TRUE	FALSE	FALSE	FALSE	FALSE	FALSE	FALSE	FALSE	FALSE	Nucleus	0	3	5	0	1	2	0	0	22.53
IL4	ENSG00000113520	interleukin 4	1245	1	FALSE	FALSE	FALSE	FALSE	FALSE	TRUE	FALSE	FALSE	FALSE	FALSE	FALSE	FALSE	Secreted	0	2	1	0	0	2	0	0	22.45
MMP9	ENSG00000100985	matrix metallopeptidase 9	1584	7	FALSE	TRUE	FALSE	TRUE	FALSE	TRUE	FALSE	FALSE	FALSE	FALSE	FALSE	FALSE	Secreted	2	3	1	0	2	1	0	0	22.34
INSR	ENSG00000171105	insulin receptor	607	5	FALSE	TRUE	FALSE	TRUE	FALSE	FALSE	FALSE	FALSE	FALSE	TRUE	FALSE	FALSE	Cell membrane	1	20	1	10	0	0	0	10	22.17
RPL38	ENSG00000172809	ribosomal protein L38	457	4	TRUE	FALSE	FALSE	FALSE	FALSE	FALSE	FALSE	FALSE	FALSE	FALSE	TRUE	FALSE	Cytoplasm	0	3	11	1	0	2	0	1	22.08
CD44	ENSG00000026508	CD44 molecule (Indian blood group)	939	2	FALSE	FALSE	FALSE	FALSE	FALSE	FALSE	FALSE	FALSE	FALSE	FALSE	FALSE	FALSE	Cell membrane	0	1	2	0	0	0	1	0	21.89
CSF2	ENSG00000164400	colony stimulating factor 2	939	2	FALSE	FALSE	FALSE	FALSE	FALSE	TRUE	FALSE	FALSE	FALSE	FALSE	FALSE	FALSE	Secreted	0	4	1	0	2	2	0	0	21.89
BCL2	ENSG00000171791	BCL2 apoptosis regulator	1486	4	TRUE	FALSE	FALSE	TRUE	FALSE	FALSE	FALSE	FALSE	FALSE	FALSE	TRUE	FALSE	Mitochondrion outer membrane	1	7	2	1	4	0	0	1	21.87
IL10	ENSG00000136634	interleukin 10	1575	2	FALSE	FALSE	FALSE	FALSE	FALSE	TRUE	FALSE	FALSE	FALSE	FALSE	FALSE	FALSE	Secreted	0	1	1	0	0	1	0	0	21.75
TUBA1A	ENSG00000167552	tubulin alpha 1a	202	5	TRUE	FALSE	FALSE	TRUE	FALSE	TRUE	FALSE	FALSE	FALSE	FALSE	TRUE	FALSE	Cytoplasm	0	19	2	1	4	1	0	1	21.53
CSF1R	ENSG00000182578	colony stimulating factor 1 receptor	733	6	TRUE	FALSE	FALSE	TRUE	FALSE	TRUE	FALSE	FALSE	FALSE	FALSE	FALSE	FALSE	Cell membrane	1	19	1	6	0	0	0	6	21.39
EZH2	ENSG00000106462	enhancer of zeste 2 polycomb repressive complex 2 subunit	686	3	TRUE	FALSE	FALSE	FALSE	FALSE	FALSE	FALSE	FALSE	FALSE	FALSE	FALSE	FALSE	Nucleus	0	3	1	2	0	0	1	2	21.38
CCND1	ENSG00000110092	cyclin D1	937	3	FALSE	FALSE	TRUE	TRUE	FALSE	FALSE	FALSE	FALSE	FALSE	FALSE	FALSE	FALSE	Nucleus	1	1	4	0	0	0	1	0	21.37
IFNA1	ENSG00000197919	interferon alpha 1	1064	1	FALSE	FALSE	FALSE	FALSE	FALSE	TRUE	FALSE	FALSE	FALSE	FALSE	FALSE	FALSE	Secreted	0	2	2	0	0	2	0	0	21.14
PGR	ENSG00000082175	progesterone receptor	799	5	TRUE	FALSE	FALSE	TRUE	FALSE	FALSE	FALSE	FALSE	FALSE	FALSE	FALSE	FALSE	Nucleus	4	26	2	9	0	0	0	9	21.08
PSMB10	ENSG00000205220	proteasome 20S subunit beta 10	196	4	FALSE	TRUE	FALSE	TRUE	FALSE	FALSE	FALSE	FALSE	FALSE	FALSE	FALSE	FALSE	Cytoplasm	0	2	11	0	1	0	1	0	20.96
TUBA4A	ENSG00000127824	tubulin alpha 4a	194	4	TRUE	FALSE	FALSE	TRUE	FALSE	TRUE	FALSE	FALSE	FALSE	FALSE	TRUE	FALSE	Cytoplasm	0	19	2	1	4	1	0	1	20.95
CASP1	ENSG00000137752	caspase 1	541	6	FALSE	TRUE	FALSE	TRUE	FALSE	FALSE	FALSE	FALSE	FALSE	FALSE	FALSE	FALSE	Cytoplasm	1	3	2	0	0	3	0	0	20.91
MAP2K1	ENSG00000169032	mitogen-activated protein kinase kinase 1	483	6	TRUE	FALSE	FALSE	TRUE	FALSE	FALSE	FALSE	FALSE	FALSE	FALSE	FALSE	FALSE	Cytoplasm	0	17	2	7	0	0	0	7	20.9
PTK2B	ENSG00000120899	protein tyrosine kinase 2 beta	282	5	FALSE	TRUE	FALSE	TRUE	FALSE	FALSE	FALSE	FALSE	FALSE	FALSE	FALSE	FALSE	Cytoplasm	0	2	1	0	0	1	1	0	20.82
CCR1	ENSG00000163823	C-C motif chemokine receptor 1	417	5	FALSE	TRUE	FALSE	TRUE	FALSE	FALSE	FALSE	FALSE	FALSE	FALSE	FALSE	FALSE	Cell membrane	0	3	1	0	0	3	0	0	20.67
NCAM1	ENSG00000149294	neural cell adhesion molecule 1	912	3	FALSE	FALSE	FALSE	FALSE	FALSE	TRUE	FALSE	FALSE	FALSE	FALSE	FALSE	FALSE	[Isoform 1]: Cell membrane	0	2	2	0	0	2	0	0	20.62
TNFSF12	ENSG00000239697	TNF superfamily member 12	402	2	FALSE	FALSE	FALSE	FALSE	FALSE	TRUE	FALSE	FALSE	FALSE	FALSE	FALSE	FALSE	Cell membrane	0	2	1	0	0	1	1	0	20.52
TOP1	ENSG00000198900	DNA topoisomerase I	441	6	TRUE	FALSE	FALSE	TRUE	TRUE	FALSE	FALSE	FALSE	FALSE	FALSE	TRUE	FALSE	Nucleus	0	18	3	4	1	0	0	4	20.45
RPS27	ENSG00000177954	ribosomal protein S27	69	5	TRUE	FALSE	FALSE	TRUE	FALSE	FALSE	FALSE	FALSE	FALSE	FALSE	TRUE	FALSE	Cytosol	0	3	14	1	0	2	0	1	20.2
PLK4	ENSG00000142731	polo like kinase 4	163	4	FALSE	TRUE	FALSE	TRUE	FALSE	FALSE	FALSE	FALSE	FALSE	FALSE	FALSE	FALSE	Cytoplasm	0	3	2	0	0	1	1	0	20.13
SERPINE1	ENSG00000106366	serpin family E member 1	813	6	FALSE	FALSE	TRUE	TRUE	FALSE	FALSE	FALSE	FALSE	FALSE	FALSE	FALSE	FALSE	Secreted	1	1	1	0	0	0	1	0	20.13
PSMA6	ENSG00000100902	proteasome 20S subunit alpha 6	105	4	FALSE	TRUE	FALSE	TRUE	FALSE	FALSE	FALSE	FALSE	FALSE	FALSE	FALSE	FALSE	Cytoplasm	0	2	11	0	1	0	1	0	20.05
PSMA4	ENSG00000041357	proteasome 20S subunit alpha 4	96	4	FALSE	TRUE	FALSE	TRUE	FALSE	FALSE	FALSE	FALSE	FALSE	FALSE	FALSE	FALSE	Cytoplasm	0	2	11	0	1	0	1	0	19.96
MAPK10	ENSG00000109339	mitogen-activated protein kinase 10	141	5	FALSE	TRUE	FALSE	TRUE	FALSE	FALSE	FALSE	FALSE	FALSE	FALSE	TRUE	FALSE	Cytoplasm	0	5	1	0	2	3	0	0	19.91
RPS6	ENSG00000137154	ribosomal protein S6	189	4	TRUE	FALSE	FALSE	FALSE	FALSE	FALSE	FALSE	FALSE	FALSE	FALSE	TRUE	FALSE	Cytosol	0	3	12	1	0	2	0	1	19.9
RPSA	ENSG00000168028	ribosomal protein SA	238	4	TRUE	FALSE	FALSE	FALSE	FALSE	FALSE	FALSE	FALSE	FALSE	FALSE	TRUE	FALSE	Cell membrane	0	3	11	1	0	2	0	1	19.89
PSMA5	ENSG00000143106	proteasome 20S subunit alpha 5	88	4	FALSE	TRUE	FALSE	TRUE	FALSE	FALSE	FALSE	FALSE	FALSE	FALSE	FALSE	FALSE	Cytoplasm	0	2	11	0	1	0	1	0	19.88
PSMA3	ENSG00000100567	proteasome 20S subunit alpha 3	84	4	FALSE	TRUE	FALSE	TRUE	FALSE	FALSE	FALSE	FALSE	FALSE	FALSE	FALSE	FALSE	Cytoplasm	0	2	11	0	1	0	1	0	19.84
PSMA1	ENSG00000129084	proteasome 20S subunit alpha 1	83	4	FALSE	TRUE	FALSE	TRUE	FALSE	FALSE	FALSE	FALSE	FALSE	FALSE	FALSE	FALSE	Cytoplasm	0	2	11	0	1	0	1	0	19.83
IL17A	ENSG00000112115	interleukin 17A	1225	3	FALSE	FALSE	FALSE	FALSE	TRUE	FALSE	FALSE	FALSE	FALSE	FALSE	TRUE	FALSE	Secreted	0	9	1	2	0	0	0	2	19.77
PSMB7	ENSG00000136930	proteasome 20S subunit beta 7	76	4	FALSE	TRUE	FALSE	TRUE	FALSE	FALSE	FALSE	FALSE	FALSE	FALSE	FALSE	FALSE	Cytoplasm	0	2	11	0	1	0	1	0	19.76
CCR5	ENSG00000160791	C-C motif chemokine receptor 5	603	6	TRUE	FALSE	FALSE	TRUE	FALSE	TRUE	FALSE	FALSE	FALSE	FALSE	FALSE	FALSE	Cell membrane	0	14	1	1	5	0	0	1	19.54
HDAC2	ENSG00000196591	histone deacetylase 2	445	5	TRUE	FALSE	FALSE	TRUE	FALSE	FALSE	FALSE	FALSE	FALSE	TRUE	FALSE	FALSE	Nucleus	0	11	6	5	3	0	0	5	19.5
PSMA7	ENSG00000101182	proteasome 20S subunit alpha 7	49	4	FALSE	TRUE	FALSE	TRUE	FALSE	FALSE	FALSE	FALSE	FALSE	FALSE	FALSE	FALSE	Cytoplasm	0	2	11	0	1	0	1	0	19.49
PSMB4	ENSG00000159377	proteasome 20S subunit beta 4	47	4	FALSE	TRUE	FALSE	TRUE	FALSE	FALSE	FALSE	FALSE	FALSE	FALSE	FALSE	FALSE	Cytoplasm	0	2	11	0	1	0	1	0	19.47
RPL22	ENSG00000116251	ribosomal protein L22	192	4	TRUE	FALSE	FALSE	FALSE	FALSE	FALSE	FALSE	FALSE	FALSE	FALSE	TRUE	FALSE	Cytoplasm	0	3	11	1	0	2	0	1	19.43
PSMA2	ENSG00000106588	proteasome 20S subunit alpha 2	38	4	FALSE	TRUE	FALSE	TRUE	FALSE	FALSE	FALSE	FALSE	FALSE	FALSE	FALSE	FALSE	Cytoplasm	0	2	11	0	1	0	1	0	19.38
PSMB1	ENSG00000008018	proteasome 20S subunit beta 1	37	4	FALSE	TRUE	FALSE	TRUE	FALSE	FALSE	FALSE	FALSE	FALSE	FALSE	FALSE	FALSE	Cytoplasm	0	2	11	0	1	0	1	0	19.37
PSMB2	ENSG00000126067	proteasome 20S subunit beta 2	35	4	FALSE	TRUE	FALSE	TRUE	FALSE	FALSE	FALSE	FALSE	FALSE	FALSE	FALSE	FALSE	Cytoplasm	0	2	11	0	1	0	1	0	19.35
PSMB6	ENSG00000142507	proteasome 20S subunit beta 6	34	4	FALSE	TRUE	FALSE	TRUE	FALSE	FALSE	FALSE	FALSE	FALSE	FALSE	FALSE	FALSE	Cytoplasm	0	2	11	0	1	0	1	0	19.34
RPL5	ENSG00000122406	ribosomal protein L5	178	4	TRUE	FALSE	FALSE	FALSE	FALSE	FALSE	FALSE	FALSE	FALSE	FALSE	TRUE	FALSE	Cytoplasm	0	3	11	1	0	2	0	1	19.29
RPL24	ENSG00000114391	ribosomal protein L24	173	4	TRUE	FALSE	FALSE	FALSE	FALSE	FALSE	FALSE	FALSE	FALSE	FALSE	TRUE	FALSE	Cytoplasm	0	3	11	1	0	2	0	1	19.24
PRKCE	ENSG00000171132	protein kinase C epsilon	272	5	TRUE	FALSE	FALSE	TRUE	FALSE	FALSE	FALSE	FALSE	FALSE	FALSE	TRUE	FALSE	Cytoplasm	1	5	2	1	0	3	0	1	19.23
IL33	ENSG00000137033	interleukin 33	769	2	FALSE	FALSE	FALSE	FALSE	FALSE	TRUE	FALSE	FALSE	FALSE	FALSE	FALSE	FALSE	Nucleus	0	3	1	0	1	2	0	0	19.19
PTPN11	ENSG00000179295	protein tyrosine phosphatase non-receptor type 11	714	4	FALSE	FALSE	TRUE	TRUE	FALSE	FALSE	FALSE	FALSE	FALSE	FALSE	FALSE	FALSE	Cytoplasm	1	1	3	0	0	0	1	0	19.14
AKT2	ENSG00000105221	AKT serine/threonine kinase 2	409	5	FALSE	TRUE	FALSE	TRUE	FALSE	FALSE	FALSE	FALSE	FALSE	FALSE	FALSE	FALSE	Cytoplasm	3	13	6	0	2	2	0	0	19.09
PRKCA	ENSG00000154229	protein kinase C alpha	504	6	TRUE	FALSE	FALSE	TRUE	FALSE	FALSE	FALSE	FALSE	FALSE	FALSE	FALSE	FALSE	Cytoplasm	1	5	3	1	1	2	0	1	19.05
PDPK1	ENSG00000140992	3-phosphoinositide dependent protein kinase 1	147	5	FALSE	TRUE	FALSE	TRUE	FALSE	FALSE	FALSE	FALSE	FALSE	FALSE	FALSE	FALSE	Cytoplasm	1	2	4	0	0	1	1	0	18.97
HLA-DRB1	ENSG00000196126	major histocompatibility complex, class II, DR beta 1	597	4	FALSE	TRUE	FALSE	FALSE	FALSE	TRUE	FALSE	FALSE	FALSE	FALSE	FALSE	FALSE	Cell membrane	0	3	2	0	1	2	0	0	18.97
NOS2	ENSG00000007171	nitric oxide synthase 2	885	5	FALSE	TRUE	FALSE	TRUE	FALSE	FALSE	FALSE	FALSE	FALSE	FALSE	FALSE	FALSE	Cytoplasm	0	3	2	0	2	1	0	0	18.85
RPS19	ENSG00000105372	ribosomal protein S19	131	4	TRUE	FALSE	FALSE	FALSE	FALSE	FALSE	FALSE	FALSE	FALSE	FALSE	TRUE	FALSE	Nucleus	0	3	11	1	0	2	0	1	18.82
ATR	ENSG00000175054	ATR serine/threonine kinase	277	3	FALSE	TRUE	FALSE	TRUE	FALSE	FALSE	FALSE	FALSE	FALSE	FALSE	FALSE	FALSE	Nucleus	0	4	9	0	0	2	0	0	18.77
RPLP0	ENSG00000089157	ribosomal protein lateral stalk subunit P0	73	4	TRUE	FALSE	FALSE	FALSE	FALSE	FALSE	FALSE	FALSE	FALSE	FALSE	TRUE	FALSE	Nucleus	0	3	12	1	0	2	0	1	18.74
RPS26	ENSG00000197728	ribosomal protein S26	123	4	TRUE	FALSE	FALSE	FALSE	FALSE	FALSE	FALSE	FALSE	FALSE	FALSE	TRUE	FALSE	Cytoplasm	0	3	11	1	0	2	0	1	18.74
RPS20	ENSG00000008988	ribosomal protein S20	117	4	TRUE	FALSE	FALSE	FALSE	FALSE	FALSE	FALSE	FALSE	FALSE	FALSE	TRUE	FALSE	Cytoplasm	0	3	11	1	0	2	0	1	18.68
PSMA8	ENSG00000154611	proteasome 20S subunit alpha 8	117	3	FALSE	TRUE	FALSE	TRUE	FALSE	FALSE	FALSE	FALSE	FALSE	FALSE	FALSE	FALSE	Nucleus	0	2	9	0	1	0	1	0	18.67
RPS3	ENSG00000149273	ribosomal protein S3	65	5	TRUE	FALSE	FALSE	FALSE	FALSE	FALSE	FALSE	FALSE	FALSE	FALSE	TRUE	FALSE	Cytoplasm	0	3	11	1	0	2	0	1	18.66
PSMD14	ENSG00000115233	proteasome 26S subunit, non-ATPase 14	62	4	FALSE	FALSE	TRUE	TRUE	FALSE	FALSE	FALSE	FALSE	FALSE	FALSE	FALSE	FALSE	Nucleoplasm	0	1	11	0	0	0	1	0	18.62
JAK3	ENSG00000105639	Janus kinase 3	657	5	TRUE	FALSE	FALSE	TRUE	FALSE	FALSE	FALSE	FALSE	FALSE	FALSE	FALSE	FALSE	Endomembrane system	0	13	1	3	2	0	0	3	18.6
NFKB1	ENSG00000109320	nuclear factor kappa B subunit 1	1695	3	FALSE	TRUE	FALSE	TRUE	FALSE	FALSE	FALSE	FALSE	FALSE	FALSE	FALSE	FALSE	Nucleus	1	1	2	0	1	0	0	0	18.45
RPL10	ENSG00000147403	ribosomal protein L10	93	4	TRUE	FALSE	FALSE	FALSE	FALSE	FALSE	FALSE	FALSE	FALSE	FALSE	TRUE	FALSE	Cytosol	0	3	11	1	0	2	0	1	18.44
PSMC3	ENSG00000165916	proteasome 26S subunit, ATPase 3	94	3	FALSE	FALSE	TRUE	FALSE	FALSE	FALSE	FALSE	FALSE	FALSE	FALSE	FALSE	FALSE	Cytoplasm	0	1	11	0	0	0	1	0	18.44
PSMB11	ENSG00000222028	proteasome subunit beta 11	94	3	FALSE	TRUE	FALSE	TRUE	FALSE	FALSE	FALSE	FALSE	FALSE	FALSE	FALSE	FALSE	Cytoplasm	0	2	9	0	1	0	1	0	18.44
RPL32	ENSG00000144713	ribosomal protein L32	92	4	TRUE	FALSE	FALSE	FALSE	FALSE	FALSE	FALSE	FALSE	FALSE	FALSE	TRUE	FALSE	Cytoplasm	0	3	11	1	0	2	0	1	18.43
TLR4	ENSG00000136869	toll like receptor 4	1240	5	FALSE	TRUE	FALSE	TRUE	FALSE	FALSE	FALSE	FALSE	FALSE	FALSE	FALSE	FALSE	Cell membrane	0	3	1	0	3	0	0	0	18.4
PSMD3	ENSG00000108344	proteasome 26S subunit, non-ATPase 3	86	3	FALSE	FALSE	TRUE	FALSE	FALSE	FALSE	FALSE	FALSE	FALSE	FALSE	FALSE	FALSE	Nucleoplasm	0	1	11	0	0	0	1	0	18.36
RPL6	ENSG00000089009	ribosomal protein L6	83	4	TRUE	FALSE	FALSE	FALSE	FALSE	FALSE	FALSE	FALSE	FALSE	FALSE	TRUE	FALSE	Cytoplasm	0	3	11	1	0	2	0	1	18.34
RPL27A	ENSG00000166441	ribosomal protein L27a	78	4	TRUE	FALSE	FALSE	FALSE	FALSE	FALSE	FALSE	FALSE	FALSE	FALSE	TRUE	FALSE	Cytoplasm	0	3	11	1	0	2	0	1	18.29
RPL13A	ENSG00000142541	ribosomal protein L13a	77	4	TRUE	FALSE	FALSE	FALSE	FALSE	FALSE	FALSE	FALSE	FALSE	FALSE	TRUE	FALSE	Cytoplasm	0	3	11	1	0	2	0	1	18.28
ANGPT2	ENSG00000091879	angiopoietin 2	428	2	FALSE	FALSE	FALSE	FALSE	FALSE	TRUE	FALSE	FALSE	FALSE	FALSE	TRUE	FALSE	Secreted	0	7	1	0	2	2	0	0	18.28
RPL31	ENSG00000071082	ribosomal protein L31	74	4	TRUE	FALSE	FALSE	FALSE	FALSE	FALSE	FALSE	FALSE	FALSE	FALSE	TRUE	FALSE	Cytoplasm	0	3	11	1	0	2	0	1	18.25
RPS7	ENSG00000171863	ribosomal protein S7	70	4	TRUE	FALSE	FALSE	FALSE	FALSE	FALSE	FALSE	FALSE	FALSE	FALSE	TRUE	FALSE	Cytoplasm	0	3	11	1	0	2	0	1	18.21
PSMC2	ENSG00000161057	proteasome 26S subunit, ATPase 2	71	3	FALSE	FALSE	TRUE	FALSE	FALSE	FALSE	FALSE	FALSE	FALSE	FALSE	FALSE	FALSE	Cytoplasm	0	1	11	0	0	0	1	0	18.21
RPL11	ENSG00000142676	ribosomal protein L11	66	4	TRUE	FALSE	FALSE	FALSE	FALSE	FALSE	FALSE	FALSE	FALSE	FALSE	TRUE	FALSE	Nucleus	0	3	11	1	0	2	0	1	18.17
SDC1	ENSG00000115884	syndecan 1	567	3	FALSE	FALSE	FALSE	FALSE	FALSE	FALSE	FALSE	FALSE	FALSE	FALSE	FALSE	FALSE	Membrane	0	1	1	0	0	0	1	0	18.17
POLE	ENSG00000177084	DNA polymerase epsilon, catalytic subunit	561	3	TRUE	FALSE	FALSE	TRUE	FALSE	FALSE	FALSE	FALSE	FALSE	FALSE	FALSE	FALSE	Nucleus	0	7	10	5	0	0	0	5	18.16
RPS4X	ENSG00000198034	ribosomal protein S4 X-linked	63	4	TRUE	FALSE	FALSE	FALSE	FALSE	FALSE	FALSE	FALSE	FALSE	FALSE	TRUE	FALSE	Cytoplasm	0	3	11	1	0	2	0	1	18.14
RPL4	ENSG00000174444	ribosomal protein L4	62	4	TRUE	FALSE	FALSE	FALSE	FALSE	FALSE	FALSE	FALSE	FALSE	FALSE	TRUE	FALSE	Cytoplasm	0	3	11	1	0	2	0	1	18.13
RPS10	ENSG00000124614	ribosomal protein S10	62	4	TRUE	FALSE	FALSE	FALSE	FALSE	FALSE	FALSE	FALSE	FALSE	FALSE	TRUE	FALSE	Cytoplasm	0	3	11	1	0	2	0	1	18.13
RPL15	ENSG00000174748	ribosomal protein L15	61	4	TRUE	FALSE	FALSE	FALSE	FALSE	FALSE	FALSE	FALSE	FALSE	FALSE	TRUE	FALSE	Cytoplasm	0	3	11	1	0	2	0	1	18.12
RPS13	ENSG00000110700	ribosomal protein S13	60	4	TRUE	FALSE	FALSE	FALSE	FALSE	FALSE	FALSE	FALSE	FALSE	FALSE	TRUE	FALSE	Endoplasmic reticulum	0	3	11	1	0	2	0	1	18.11
RPS24	ENSG00000138326	ribosomal protein S24	59	4	TRUE	FALSE	FALSE	FALSE	FALSE	FALSE	FALSE	FALSE	FALSE	FALSE	TRUE	FALSE	Cytosol	0	3	11	1	0	2	0	1	18.1
PSMD2	ENSG00000175166	proteasome 26S subunit ubiquitin receptor, non-ATPase 2	59	3	FALSE	FALSE	TRUE	FALSE	FALSE	FALSE	FALSE	FALSE	FALSE	FALSE	FALSE	FALSE	No data	0	1	11	0	0	0	1	0	18.09
RPL7	ENSG00000147604	ribosomal protein L7	56	4	TRUE	FALSE	FALSE	FALSE	FALSE	FALSE	FALSE	FALSE	FALSE	FALSE	TRUE	FALSE	Cytoplasm	0	3	11	1	0	2	0	1	18.07
RPS11	ENSG00000142534	ribosomal protein S11	56	4	TRUE	FALSE	FALSE	FALSE	FALSE	FALSE	FALSE	FALSE	FALSE	FALSE	TRUE	FALSE	Cytosol	0	3	11	1	0	2	0	1	18.07
RPS23	ENSG00000186468	ribosomal protein S23	55	4	TRUE	FALSE	FALSE	FALSE	FALSE	FALSE	FALSE	FALSE	FALSE	FALSE	TRUE	FALSE	Cytoplasm	0	3	11	1	0	2	0	1	18.06
PSMD6	ENSG00000163636	proteasome 26S subunit, non-ATPase 6	56	3	FALSE	FALSE	TRUE	FALSE	FALSE	FALSE	FALSE	FALSE	FALSE	FALSE	FALSE	FALSE	No data	0	1	11	0	0	0	1	0	18.06
RPL3	ENSG00000100316	ribosomal protein L3	54	4	TRUE	FALSE	FALSE	FALSE	FALSE	FALSE	FALSE	FALSE	FALSE	FALSE	TRUE	FALSE	Nucleus	0	3	11	1	0	2	0	1	18.05
RPS21	ENSG00000171858	ribosomal protein S21	54	4	TRUE	FALSE	FALSE	FALSE	FALSE	FALSE	FALSE	FALSE	FALSE	FALSE	TRUE	FALSE	Cytoplasm	0	3	11	1	0	2	0	1	18.05
SEM1	ENSG00000127922	SEM1 26S proteasome subunit	55	3	FALSE	FALSE	TRUE	FALSE	FALSE	FALSE	FALSE	FALSE	FALSE	FALSE	FALSE	FALSE	Nucleus	0	1	11	0	0	0	1	0	18.05
MAP2K2	ENSG00000126934	mitogen-activated protein kinase kinase 2	298	6	TRUE	FALSE	FALSE	TRUE	FALSE	FALSE	FALSE	FALSE	FALSE	FALSE	FALSE	FALSE	Cytoplasm	0	16	1	7	0	0	0	7	18.05
RPL34	ENSG00000109475	ribosomal protein L34	53	4	TRUE	FALSE	FALSE	FALSE	FALSE	FALSE	FALSE	FALSE	FALSE	FALSE	TRUE	FALSE	Cytoplasm	0	3	11	1	0	2	0	1	18.04
RPS29	ENSG00000213741	ribosomal protein S29	53	4	TRUE	FALSE	FALSE	FALSE	FALSE	FALSE	FALSE	FALSE	FALSE	FALSE	TRUE	FALSE	Cytoplasm	0	3	11	1	0	2	0	1	18.04
PSMC6	ENSG00000100519	proteasome 26S subunit, ATPase 6	54	3	FALSE	FALSE	TRUE	FALSE	FALSE	FALSE	FALSE	FALSE	FALSE	FALSE	FALSE	FALSE	Cytoplasm	0	1	11	0	0	0	1	0	18.04
PSMD1	ENSG00000173692	proteasome 26S subunit, non-ATPase 1	54	3	FALSE	FALSE	TRUE	FALSE	FALSE	FALSE	FALSE	FALSE	FALSE	FALSE	FALSE	FALSE	Nucleoplasm	0	1	11	0	0	0	1	0	18.04
RPL12	ENSG00000197958	ribosomal protein L12	52	4	TRUE	FALSE	FALSE	FALSE	FALSE	FALSE	FALSE	FALSE	FALSE	FALSE	TRUE	FALSE	Golgi apparatus	0	3	11	1	0	2	0	1	18.03
RPL13	ENSG00000167526	ribosomal protein L13	51	4	TRUE	FALSE	FALSE	FALSE	FALSE	FALSE	FALSE	FALSE	FALSE	FALSE	TRUE	FALSE	Cytoplasm	0	3	11	1	0	2	0	1	18.02
RPS15A	ENSG00000134419	ribosomal protein S15a	51	4	TRUE	FALSE	FALSE	FALSE	FALSE	FALSE	FALSE	FALSE	FALSE	FALSE	TRUE	FALSE	No data	0	3	11	1	0	2	0	1	18.02
RPL14	ENSG00000188846	ribosomal protein L14	50	4	TRUE	FALSE	FALSE	FALSE	FALSE	FALSE	FALSE	FALSE	FALSE	FALSE	TRUE	FALSE	Cytoplasm	0	3	11	1	0	2	0	1	18.01
RPL9	ENSG00000163682	ribosomal protein L9	50	4	TRUE	FALSE	FALSE	FALSE	FALSE	FALSE	FALSE	FALSE	FALSE	FALSE	TRUE	FALSE	Cytoplasm	0	3	11	1	0	2	0	1	18.01
PSMC5	ENSG00000087191	proteasome 26S subunit, ATPase 5	51	3	FALSE	FALSE	TRUE	FALSE	FALSE	FALSE	FALSE	FALSE	FALSE	FALSE	FALSE	FALSE	Cytoplasm	0	1	11	0	0	0	1	0	18.01
FAU	ENSG00000149806	FAU ubiquitin like and ribosomal protein S30 fusion	49	4	TRUE	FALSE	FALSE	FALSE	FALSE	FALSE	FALSE	FALSE	FALSE	FALSE	TRUE	FALSE	[40S ribosomal protein S30]: Nucleus	0	3	11	1	0	2	0	1	18
RPS14	ENSG00000164587	ribosomal protein S14	48	4	TRUE	FALSE	FALSE	FALSE	FALSE	FALSE	FALSE	FALSE	FALSE	FALSE	TRUE	FALSE	Cytosol	0	3	11	1	0	2	0	1	17.99
RPL21	ENSG00000122026	ribosomal protein L21	47	4	TRUE	FALSE	FALSE	FALSE	FALSE	FALSE	FALSE	FALSE	FALSE	FALSE	TRUE	FALSE	Cytoplasm	0	3	11	1	0	2	0	1	17.98
RPL37A	ENSG00000197756	ribosomal protein L37a	46	4	TRUE	FALSE	FALSE	FALSE	FALSE	FALSE	FALSE	FALSE	FALSE	FALSE	TRUE	FALSE	Cytoplasm	0	3	11	1	0	2	0	1	17.97
PSMD4	ENSG00000159352	proteasome 26S subunit ubiquitin receptor, non-ATPase 4	47	3	FALSE	FALSE	TRUE	FALSE	FALSE	FALSE	FALSE	FALSE	FALSE	FALSE	FALSE	FALSE	Nucleoplasm	0	1	11	0	0	0	1	0	17.97
RPL26	ENSG00000161970	ribosomal protein L26	45	4	TRUE	FALSE	FALSE	FALSE	FALSE	FALSE	FALSE	FALSE	FALSE	FALSE	TRUE	FALSE	Cytoplasm	0	3	11	1	0	2	0	1	17.96
PSMD13	ENSG00000185627	proteasome 26S subunit, non-ATPase 13	46	3	FALSE	FALSE	TRUE	FALSE	FALSE	FALSE	FALSE	FALSE	FALSE	FALSE	FALSE	FALSE	Nuclear speckles	0	1	11	0	0	0	1	0	17.96
RPL29	ENSG00000162244	ribosomal protein L29	44	4	TRUE	FALSE	FALSE	FALSE	FALSE	FALSE	FALSE	FALSE	FALSE	FALSE	TRUE	FALSE	Cytoplasm	0	3	11	1	0	2	0	1	17.95
RPL19	ENSG00000108298	ribosomal protein L19	42	4	TRUE	FALSE	FALSE	FALSE	FALSE	FALSE	FALSE	FALSE	FALSE	FALSE	TRUE	FALSE	Cytoplasm	0	3	11	1	0	2	0	1	17.93
RPL41	ENSG00000229117	ribosomal protein L41	42	4	TRUE	FALSE	FALSE	FALSE	FALSE	FALSE	FALSE	FALSE	FALSE	FALSE	TRUE	FALSE	Endoplasmic reticulum	0	3	11	1	0	2	0	1	17.93
RPS28	ENSG00000233927	ribosomal protein S28	42	4	TRUE	FALSE	FALSE	FALSE	FALSE	FALSE	FALSE	FALSE	FALSE	FALSE	TRUE	FALSE	Cytoplasm	0	3	11	1	0	2	0	1	17.93
PSMD12	ENSG00000197170	proteasome 26S subunit, non-ATPase 12	42	3	FALSE	FALSE	TRUE	FALSE	FALSE	FALSE	FALSE	FALSE	FALSE	FALSE	FALSE	FALSE	Microtubules	0	1	11	0	0	0	1	0	17.92
RPL18	ENSG00000063177	ribosomal protein L18	40	4	TRUE	FALSE	FALSE	FALSE	FALSE	FALSE	FALSE	FALSE	FALSE	FALSE	TRUE	FALSE	Cytoplasm	0	3	11	1	0	2	0	1	17.91
RPS2	ENSG00000140988	ribosomal protein S2	40	4	TRUE	FALSE	FALSE	FALSE	FALSE	FALSE	FALSE	FALSE	FALSE	FALSE	TRUE	FALSE	Cytosol	0	3	11	1	0	2	0	1	17.91
RPL27	ENSG00000131469	ribosomal protein L27	39	4	TRUE	FALSE	FALSE	FALSE	FALSE	FALSE	FALSE	FALSE	FALSE	FALSE	TRUE	FALSE	Cytoplasm	0	3	11	1	0	2	0	1	17.9
RPS16	ENSG00000105193	ribosomal protein S16	39	4	TRUE	FALSE	FALSE	FALSE	FALSE	FALSE	FALSE	FALSE	FALSE	FALSE	TRUE	FALSE	Cytosol	0	3	11	1	0	2	0	1	17.9
RPS15	ENSG00000115268	ribosomal protein S15	38	4	TRUE	FALSE	FALSE	FALSE	FALSE	FALSE	FALSE	FALSE	FALSE	FALSE	TRUE	FALSE	Cytosol	0	3	11	1	0	2	0	1	17.89
RPS3A	ENSG00000145425	ribosomal protein S3A	38	4	TRUE	FALSE	FALSE	FALSE	FALSE	FALSE	FALSE	FALSE	FALSE	FALSE	TRUE	FALSE	Cytoplasm	0	3	11	1	0	2	0	1	17.89
RPS5	ENSG00000083845	ribosomal protein S5	38	4	TRUE	FALSE	FALSE	FALSE	FALSE	FALSE	FALSE	FALSE	FALSE	FALSE	TRUE	FALSE	Cytosol	0	3	11	1	0	2	0	1	17.89
RPL10A	ENSG00000198755	ribosomal protein L10a	37	4	TRUE	FALSE	FALSE	FALSE	FALSE	FALSE	FALSE	FALSE	FALSE	FALSE	TRUE	FALSE	Cytoplasm	0	3	11	1	0	2	0	1	17.88
RPL8	ENSG00000161016	ribosomal protein L8	37	4	TRUE	FALSE	FALSE	FALSE	FALSE	FALSE	FALSE	FALSE	FALSE	FALSE	TRUE	FALSE	Cytoplasm	0	3	11	1	0	2	0	1	17.88
RPL36	ENSG00000130255	ribosomal protein L36	36	4	TRUE	FALSE	FALSE	FALSE	FALSE	FALSE	FALSE	FALSE	FALSE	FALSE	TRUE	FALSE	Cytoplasm	0	3	11	1	0	2	0	1	17.87
RPS12	ENSG00000112306	ribosomal protein S12	36	4	TRUE	FALSE	FALSE	FALSE	FALSE	FALSE	FALSE	FALSE	FALSE	FALSE	TRUE	FALSE	Cytoplasm	0	3	11	1	0	2	0	1	17.87
RPL23A	ENSG00000198242	ribosomal protein L23a	35	4	TRUE	FALSE	FALSE	FALSE	FALSE	FALSE	FALSE	FALSE	FALSE	FALSE	TRUE	FALSE	Cytoplasm	0	3	11	1	0	2	0	1	17.86
PSMD7	ENSG00000103035	proteasome 26S subunit, non-ATPase 7	36	3	FALSE	FALSE	TRUE	FALSE	FALSE	FALSE	FALSE	FALSE	FALSE	FALSE	FALSE	FALSE	Nucleoplasm	0	1	11	0	0	0	1	0	17.86
RPL35A	ENSG00000182899	ribosomal protein L35a	34	4	TRUE	FALSE	FALSE	FALSE	FALSE	FALSE	FALSE	FALSE	FALSE	FALSE	TRUE	FALSE	Cytoplasm	0	3	11	1	0	2	0	1	17.85
RPLP1	ENSG00000137818	ribosomal protein lateral stalk subunit P1	83	3	TRUE	FALSE	FALSE	FALSE	FALSE	FALSE	FALSE	FALSE	FALSE	FALSE	TRUE	FALSE	Cytosol	0	3	11	1	0	2	0	1	17.84
RPS4Y1	ENSG00000129824	ribosomal protein S4 Y-linked 1	32	4	TRUE	FALSE	FALSE	FALSE	FALSE	FALSE	FALSE	FALSE	FALSE	FALSE	TRUE	FALSE	No data	0	3	11	1	0	2	0	1	17.83
PSMD11	ENSG00000108671	proteasome 26S subunit, non-ATPase 11	33	3	FALSE	FALSE	TRUE	FALSE	FALSE	FALSE	FALSE	FALSE	FALSE	FALSE	FALSE	FALSE	Nucleus	0	1	11	0	0	0	1	0	17.83
RPL30	ENSG00000156482	ribosomal protein L30	31	4	TRUE	FALSE	FALSE	FALSE	FALSE	FALSE	FALSE	FALSE	FALSE	FALSE	TRUE	FALSE	Cytoplasm	0	3	11	1	0	2	0	1	17.82
RPL35	ENSG00000136942	ribosomal protein L35	31	4	TRUE	FALSE	FALSE	FALSE	FALSE	FALSE	FALSE	FALSE	FALSE	FALSE	TRUE	FALSE	Cytoplasm	0	3	11	1	0	2	0	1	17.82
RPL23	ENSG00000125691	ribosomal protein L23	30	4	TRUE	FALSE	FALSE	FALSE	FALSE	FALSE	FALSE	FALSE	FALSE	FALSE	TRUE	FALSE	Cytoplasm	0	3	11	1	0	2	0	1	17.81
RPL28	ENSG00000108107	ribosomal protein L28	30	4	TRUE	FALSE	FALSE	FALSE	FALSE	FALSE	FALSE	FALSE	FALSE	FALSE	TRUE	FALSE	Cytoplasm	0	3	11	1	0	2	0	1	17.81
RPL39	ENSG00000198918	ribosomal protein L39	30	4	TRUE	FALSE	FALSE	FALSE	FALSE	FALSE	FALSE	FALSE	FALSE	FALSE	TRUE	FALSE	Cytoplasm	0	3	11	1	0	2	0	1	17.81
RPS8	ENSG00000142937	ribosomal protein S8	30	4	TRUE	FALSE	FALSE	FALSE	FALSE	FALSE	FALSE	FALSE	FALSE	FALSE	TRUE	FALSE	Cytoplasm	0	3	11	1	0	2	0	1	17.81
PSMD8	ENSG00000099341	proteasome 26S subunit, non-ATPase 8	30	3	FALSE	FALSE	TRUE	FALSE	FALSE	FALSE	FALSE	FALSE	FALSE	FALSE	FALSE	FALSE	Cytosol	0	1	11	0	0	0	1	0	17.8
RPL37	ENSG00000145592	ribosomal protein L37	28	4	TRUE	FALSE	FALSE	FALSE	FALSE	FALSE	FALSE	FALSE	FALSE	FALSE	TRUE	FALSE	Cytoplasm	0	3	11	1	0	2	0	1	17.79
RPL18A	ENSG00000105640	ribosomal protein L18a	27	4	TRUE	FALSE	FALSE	FALSE	FALSE	FALSE	FALSE	FALSE	FALSE	FALSE	TRUE	FALSE	Cytoplasm	0	3	11	1	0	2	0	1	17.78
PSMC1	ENSG00000100764	proteasome 26S subunit, ATPase 1	27	3	FALSE	FALSE	TRUE	FALSE	FALSE	FALSE	FALSE	FALSE	FALSE	FALSE	FALSE	FALSE	Cytoplasm	0	1	11	0	0	0	1	0	17.77
RPL36A	ENSG00000241343	ribosomal protein L36a	20	4	TRUE	FALSE	FALSE	FALSE	FALSE	FALSE	FALSE	FALSE	FALSE	FALSE	TRUE	FALSE	Cytoplasm	0	3	11	1	0	2	0	1	17.71
IKBKB	ENSG00000104365	inhibitor of nuclear factor kappa B kinase subunit beta	414	4	FALSE	TRUE	FALSE	TRUE	FALSE	FALSE	FALSE	FALSE	FALSE	FALSE	FALSE	FALSE	Cytoplasm	0	3	3	0	1	2	0	0	17.64
TNFRSF18	ENSG00000186891	TNF receptor superfamily member 18	161	1	FALSE	FALSE	FALSE	FALSE	FALSE	TRUE	FALSE	FALSE	FALSE	FALSE	FALSE	FALSE	[Isoform 1]: Cell membrane	0	2	1	0	0	1	1	0	17.61
CD28	ENSG00000178562	CD28 molecule	639	2	FALSE	FALSE	FALSE	FALSE	FALSE	TRUE	FALSE	FALSE	FALSE	FALSE	FALSE	FALSE	Membrane	0	2	2	0	0	2	0	0	17.39
ANGPT1	ENSG00000154188	angiopoietin 1	478	1	FALSE	FALSE	FALSE	FALSE	FALSE	FALSE	FALSE	FALSE	FALSE	FALSE	TRUE	FALSE	Secreted	0	2	1	0	1	0	1	0	17.28
CXCL10	ENSG00000169245	C-X-C motif chemokine ligand 10	817	3	FALSE	FALSE	FALSE	FALSE	FALSE	TRUE	FALSE	FALSE	FALSE	FALSE	FALSE	FALSE	Secreted	1	2	1	0	0	2	0	0	17.17
IL1R1	ENSG00000115594	interleukin 1 receptor type 1	560	2	FALSE	FALSE	FALSE	FALSE	FALSE	TRUE	FALSE	FALSE	FALSE	TRUE	FALSE	FALSE	Membrane	0	3	1	1	0	2	0	1	17.11
ITGB2	ENSG00000160255	integrin subunit beta 2	751	7	TRUE	FALSE	FALSE	TRUE	FALSE	TRUE	FALSE	FALSE	FALSE	FALSE	FALSE	FALSE	Cell membrane	0	2	1	1	0	1	0	1	17.02
MAPK9	ENSG00000050748	mitogen-activated protein kinase 9	250	5	FALSE	TRUE	FALSE	TRUE	FALSE	FALSE	FALSE	FALSE	FALSE	FALSE	FALSE	FALSE	Cytoplasm	1	3	1	0	0	3	0	0	17
FASLG	ENSG00000117560	Fas ligand	1133	1	FALSE	FALSE	FALSE	FALSE	FALSE	FALSE	FALSE	FALSE	FALSE	FALSE	TRUE	FALSE	Cell membrane	0	1	1	0	0	1	0	0	16.83
CCL2	ENSG00000108691	C-C motif chemokine ligand 2	1214	3	FALSE	FALSE	FALSE	FALSE	FALSE	TRUE	FALSE	FALSE	FALSE	FALSE	FALSE	FALSE	Secreted	1	1	1	0	0	1	0	0	16.64
SRC	ENSG00000197122	SRC proto-oncogene, non-receptor tyrosine kinase	758	6	TRUE	FALSE	FALSE	TRUE	FALSE	FALSE	FALSE	FALSE	FALSE	FALSE	FALSE	FALSE	Cell membrane	1	11	1	4	0	0	0	4	16.62
PARP1	ENSG00000143799	poly(ADP-ribose) polymerase 1	349	5	TRUE	FALSE	FALSE	TRUE	FALSE	FALSE	FALSE	FALSE	FALSE	FALSE	FALSE	FALSE	Chromosome	0	10	4	7	0	0	0	7	16.56
WEE1	ENSG00000166483	WEE1 G2 checkpoint kinase	605	5	FALSE	TRUE	FALSE	TRUE	FALSE	FALSE	FALSE	FALSE	FALSE	FALSE	FALSE	FALSE	Nucleus	0	1	7	0	0	1	0	0	16.55
PRKCD	ENSG00000163932	protein kinase C delta	450	4	TRUE	FALSE	FALSE	TRUE	FALSE	FALSE	FALSE	FALSE	FALSE	FALSE	TRUE	FALSE	Cytoplasm	1	5	2	1	0	2	0	1	16.51
ITGB1	ENSG00000150093	integrin subunit beta 1	331	5	FALSE	TRUE	FALSE	TRUE	FALSE	TRUE	FALSE	FALSE	FALSE	FALSE	TRUE	FALSE	Cell membrane	0	3	1	0	1	2	0	0	16.31
PRKCB	ENSG00000166501	protein kinase C beta	450	3	TRUE	FALSE	FALSE	TRUE	FALSE	FALSE	FALSE	FALSE	FALSE	FALSE	FALSE	FALSE	Cytoplasm	0	6	3	1	2	1	0	1	16.01
PRKCG	ENSG00000126583	protein kinase C gamma	291	4	TRUE	FALSE	FALSE	TRUE	FALSE	FALSE	FALSE	FALSE	FALSE	FALSE	FALSE	FALSE	Cytoplasm	0	4	1	1	0	2	0	1	15.92
CREBBP	ENSG00000005339	CREB binding protein	741	4	FALSE	FALSE	FALSE	TRUE	FALSE	FALSE	FALSE	FALSE	FALSE	FALSE	TRUE	FALSE	Cytoplasm	0	1	4	0	0	1	0	0	15.91
HDAC4	ENSG00000068024	histone deacetylase 4	432	5	TRUE	FALSE	FALSE	TRUE	FALSE	FALSE	FALSE	FALSE	FALSE	TRUE	FALSE	FALSE	Nucleus	0	9	2	4	3	0	0	4	15.86
PRKCQ	ENSG00000065675	protein kinase C theta	381	5	TRUE	FALSE	FALSE	TRUE	FALSE	FALSE	FALSE	FALSE	FALSE	FALSE	FALSE	FALSE	Cytoplasm	1	4	2	1	0	2	0	1	15.82
S1PR1	ENSG00000170989	sphingosine-1-phosphate receptor 1	312	5	TRUE	FALSE	FALSE	TRUE	FALSE	FALSE	FALSE	FALSE	FALSE	FALSE	FALSE	FALSE	Cell membrane	0	12	1	7	0	0	0	7	15.69
TYMS	ENSG00000176890	thymidylate synthetase	412	5	TRUE	FALSE	FALSE	TRUE	FALSE	FALSE	FALSE	FALSE	FALSE	FALSE	FALSE	FALSE	Nucleus	0	10	2	6	0	0	0	6	15.68
POLD1	ENSG00000062822	DNA polymerase delta 1, catalytic subunit	501	3	TRUE	FALSE	FALSE	TRUE	FALSE	FALSE	FALSE	FALSE	FALSE	FALSE	FALSE	FALSE	Nucleus	0	7	6	5	0	0	0	5	15.56
IFNA2	ENSG00000188379	interferon alpha 2	404	3	FALSE	FALSE	FALSE	FALSE	FALSE	TRUE	FALSE	FALSE	FALSE	FALSE	FALSE	FALSE	Secreted	0	2	2	0	0	2	0	0	15.54
CDK6	ENSG00000105810	cyclin dependent kinase 6	548	5	TRUE	FALSE	FALSE	TRUE	FALSE	FALSE	FALSE	FALSE	FALSE	FALSE	FALSE	FALSE	Cytoplasm	1	12	1	6	0	0	0	6	15.54
STAT3	ENSG00000168610	signal transducer and activator of transcription 3	1045	3	FALSE	FALSE	FALSE	TRUE	FALSE	FALSE	FALSE	FALSE	FALSE	FALSE	FALSE	FALSE	Cytoplasm	1	1	2	0	0	1	0	0	15.45
POLE3	ENSG00000148229	DNA polymerase epsilon 3, accessory subunit	382	1	TRUE	FALSE	FALSE	FALSE	FALSE	FALSE	FALSE	FALSE	FALSE	FALSE	FALSE	FALSE	Nucleus	0	7	10	5	0	0	0	5	15.37
POLE2	ENSG00000100479	DNA polymerase epsilon 2, accessory subunit	327	2	TRUE	FALSE	FALSE	FALSE	FALSE	FALSE	FALSE	FALSE	FALSE	FALSE	FALSE	FALSE	Nucleus	0	7	10	5	0	0	0	5	15.32
IFNAR1	ENSG00000142166	interferon alpha and beta receptor subunit 1	372	2	FALSE	FALSE	FALSE	FALSE	TRUE	FALSE	FALSE	FALSE	FALSE	TRUE	FALSE	FALSE	[Isoform 1]: Cell membrane	0	12	2	7	0	0	0	7	15.29
TYK2	ENSG00000105397	tyrosine kinase 2	320	5	TRUE	FALSE	FALSE	TRUE	FALSE	FALSE	FALSE	FALSE	FALSE	FALSE	FALSE	FALSE	Cytosol	0	12	2	3	2	0	0	3	15.23
POLA1	ENSG00000101868	DNA polymerase alpha 1, catalytic subunit	313	4	TRUE	FALSE	FALSE	TRUE	FALSE	FALSE	FALSE	FALSE	FALSE	FALSE	FALSE	FALSE	Nucleus	0	7	8	5	0	0	0	5	15.18
CSF1	ENSG00000184371	colony stimulating factor 1	667	2	FALSE	FALSE	FALSE	FALSE	FALSE	TRUE	FALSE	FALSE	FALSE	FALSE	FALSE	FALSE	Cell membrane	1	2	1	0	0	2	0	0	15.17
ICAM1	ENSG00000090339	intercellular adhesion molecule 1	1100	3	FALSE	FALSE	FALSE	TRUE	FALSE	TRUE	FALSE	FALSE	FALSE	FALSE	FALSE	FALSE	Membrane	2	2	2	0	1	1	0	0	15
LTBR	ENSG00000111321	lymphotoxin beta receptor	285	1	FALSE	FALSE	FALSE	FALSE	FALSE	FALSE	FALSE	FALSE	FALSE	FALSE	FALSE	FALSE	Membrane	0	1	2	0	0	0	1	0	14.85
THRB	ENSG00000151090	thyroid hormone receptor beta	429	5	TRUE	FALSE	FALSE	TRUE	FALSE	FALSE	FALSE	FALSE	FALSE	FALSE	FALSE	FALSE	Nucleus	0	9	2	5	0	0	0	5	14.84
RPS6KA3	ENSG00000177189	ribosomal protein S6 kinase A3	372	4	FALSE	FALSE	TRUE	TRUE	FALSE	FALSE	FALSE	FALSE	FALSE	FALSE	FALSE	FALSE	Nucleus	1	1	1	0	0	0	1	0	14.72
TNFRSF17	ENSG00000048462	TNF receptor superfamily member 17	269	1	FALSE	FALSE	FALSE	FALSE	TRUE	FALSE	FALSE	FALSE	FALSE	FALSE	TRUE	FALSE	Cell membrane	0	4	1	1	1	2	0	1	14.7
IL2RA	ENSG00000134460	interleukin 2 receptor subunit alpha	751	1	FALSE	FALSE	FALSE	FALSE	TRUE	FALSE	FALSE	FALSE	FALSE	TRUE	FALSE	FALSE	Membrane	0	8	1	4	0	0	0	4	14.55
PRIM1	ENSG00000198056	DNA primase subunit 1	344	2	TRUE	FALSE	FALSE	FALSE	FALSE	FALSE	FALSE	FALSE	FALSE	FALSE	FALSE	FALSE	No data	0	7	8	5	0	0	0	5	14.49
MMP2	ENSG00000087245	matrix metallopeptidase 2	1186	6	FALSE	TRUE	FALSE	TRUE	FALSE	FALSE	FALSE	FALSE	FALSE	FALSE	FALSE	FALSE	[Isoform 1]: Secreted	1	1	1	0	1	0	0	0	14.36
NR3C2	ENSG00000151623	nuclear receptor subfamily 3 group C member 2	629	5	TRUE	FALSE	FALSE	TRUE	FALSE	FALSE	FALSE	FALSE	FALSE	FALSE	FALSE	FALSE	Cytoplasm	3	16	2	5	0	0	0	5	14.34
PSMB5	ENSG00000100804	proteasome 20S subunit beta 5	179	4	TRUE	FALSE	FALSE	TRUE	FALSE	FALSE	FALSE	FALSE	FALSE	TRUE	FALSE	FALSE	Cytoplasm	0	6	11	4	0	0	0	4	14.33
HDAC8	ENSG00000147099	histone deacetylase 8	229	5	TRUE	FALSE	FALSE	TRUE	FALSE	FALSE	FALSE	FALSE	FALSE	TRUE	FALSE	FALSE	Nucleus	0	10	2	4	3	0	0	4	14.33
TERT	ENSG00000164362	telomerase reverse transcriptase	672	2	FALSE	FALSE	FALSE	TRUE	FALSE	FALSE	FALSE	FALSE	FALSE	FALSE	TRUE	FALSE	Nucleus	0	2	2	0	1	1	0	0	14.22
P4HB	ENSG00000185624	prolyl 4-hydroxylase subunit beta	163	6	FALSE	TRUE	FALSE	TRUE	FALSE	FALSE	FALSE	FALSE	FALSE	FALSE	FALSE	FALSE	Endoplasmic reticulum	0	2	1	0	0	2	0	0	14.13
HDAC7	ENSG00000061273	histone deacetylase 7	208	5	TRUE	FALSE	FALSE	TRUE	FALSE	FALSE	FALSE	FALSE	FALSE	TRUE	FALSE	FALSE	Nucleus	0	9	3	4	3	0	0	4	14.12
PRIM2	ENSG00000146143	DNA primase subunit 2	304	2	TRUE	FALSE	FALSE	FALSE	FALSE	FALSE	FALSE	FALSE	FALSE	FALSE	FALSE	FALSE	Nucleoplasm	0	7	8	5	0	0	0	5	14.09
POLD2	ENSG00000106628	DNA polymerase delta 2, accessory subunit	314	3	TRUE	FALSE	FALSE	FALSE	FALSE	FALSE	FALSE	FALSE	FALSE	FALSE	FALSE	FALSE	Nucleus	0	7	6	5	0	0	0	5	13.69
IFNB1	ENSG00000171855	interferon beta 1	666	3	FALSE	FALSE	FALSE	FALSE	FALSE	FALSE	FALSE	FALSE	FALSE	FALSE	TRUE	FALSE	Secreted	0	1	2	0	0	1	0	0	13.66
IFNAR2	ENSG00000159110	interferon alpha and beta receptor subunit 2	256	2	FALSE	FALSE	FALSE	FALSE	FALSE	FALSE	FALSE	FALSE	FALSE	TRUE	FALSE	FALSE	[Isoform 1]: Cell membrane	0	11	2	7	0	0	0	7	13.63
LYN	ENSG00000254087	LYN proto-oncogene, Src family tyrosine kinase	652	5	TRUE	FALSE	FALSE	TRUE	FALSE	FALSE	FALSE	FALSE	FALSE	FALSE	FALSE	FALSE	Cell membrane	1	9	2	2	0	0	0	2	13.54
POLA2	ENSG00000014138	DNA polymerase alpha 2, accessory subunit	296	2	TRUE	FALSE	FALSE	FALSE	FALSE	FALSE	FALSE	FALSE	FALSE	FALSE	FALSE	FALSE	Nucleus	0	7	8	4	0	0	0	4	13.5
TNFRSF10A	ENSG00000104689	TNF receptor superfamily member 10a	294	2	FALSE	FALSE	FALSE	FALSE	FALSE	TRUE	FALSE	FALSE	FALSE	FALSE	TRUE	FALSE	Cell membrane	0	2	1	0	0	2	0	0	13.44
PRKDC	ENSG00000253729	protein kinase, DNA-activated, catalytic subunit	629	4	FALSE	TRUE	FALSE	TRUE	FALSE	FALSE	FALSE	FALSE	FALSE	FALSE	FALSE	FALSE	Nucleus	0	1	1	0	0	1	0	0	13.29
TOP2B	ENSG00000077097	DNA topoisomerase II beta	268	5	TRUE	FALSE	FALSE	TRUE	FALSE	FALSE	FALSE	FALSE	FALSE	FALSE	FALSE	FALSE	Nucleus	0	9	3	4	0	0	0	4	13.22
RPS6KA2	ENSG00000071242	ribosomal protein S6 kinase A2	69	3	FALSE	FALSE	TRUE	TRUE	FALSE	FALSE	FALSE	FALSE	FALSE	FALSE	FALSE	FALSE	Nucleus	0	1	1	0	0	0	1	0	13.19
PARP2	ENSG00000129484	poly(ADP-ribose) polymerase 2	155	5	TRUE	FALSE	FALSE	TRUE	FALSE	FALSE	FALSE	FALSE	FALSE	FALSE	FALSE	FALSE	Nucleus	0	10	1	7	0	0	0	7	13.12
POLD4	ENSG00000175482	DNA polymerase delta 4, accessory subunit	306	2	TRUE	FALSE	FALSE	FALSE	FALSE	FALSE	FALSE	FALSE	FALSE	FALSE	FALSE	FALSE	Nucleus	0	7	6	5	0	0	0	5	13.11
IL1A	ENSG00000115008	interleukin 1 alpha	809	2	FALSE	FALSE	FALSE	FALSE	FALSE	TRUE	FALSE	FALSE	FALSE	FALSE	FALSE	FALSE	Nucleus	1	2	1	0	1	1	0	0	13.09
POLD3	ENSG00000077514	DNA polymerase delta 3, accessory subunit	349	2	TRUE	FALSE	FALSE	FALSE	FALSE	FALSE	FALSE	FALSE	FALSE	FALSE	FALSE	FALSE	Cytoplasm	0	7	6	4	0	0	0	4	13.03
SOD1	ENSG00000142168	superoxide dismutase 1	1052	2	FALSE	FALSE	FALSE	FALSE	FALSE	FALSE	FALSE	FALSE	FALSE	FALSE	FALSE	FALSE	Cytoplasm	0	1	1	0	1	0	0	0	13.02
SIRT1	ENSG00000096717	sirtuin 1	793	4	FALSE	TRUE	FALSE	TRUE	FALSE	FALSE	FALSE	FALSE	FALSE	FALSE	FALSE	FALSE	Nucleus	1	1	1	0	0	1	0	0	12.93
CASP3	ENSG00000164305	caspase 3	930	5	FALSE	TRUE	FALSE	TRUE	FALSE	FALSE	FALSE	FALSE	FALSE	FALSE	FALSE	FALSE	Cytoplasm	2	1	1	0	0	1	0	0	12.8
HGF	ENSG00000019991	hepatocyte growth factor	675	4	FALSE	FALSE	FALSE	TRUE	FALSE	TRUE	FALSE	FALSE	FALSE	FALSE	FALSE	FALSE	No data	1	2	1	0	1	1	0	0	12.75
MAPKAPK2	ENSG00000162889	MAPK activated protein kinase 2	104	5	FALSE	FALSE	TRUE	TRUE	FALSE	FALSE	FALSE	FALSE	FALSE	FALSE	FALSE	FALSE	Cytoplasm	1	1	1	0	0	0	1	0	12.54
FGF2	ENSG00000138685	fibroblast growth factor 2	825	5	FALSE	FALSE	FALSE	TRUE	FALSE	FALSE	FALSE	FALSE	FALSE	FALSE	TRUE	FALSE	Secreted	0	1	1	0	1	0	0	0	12.25
RARA	ENSG00000131759	retinoic acid receptor alpha	465	5	TRUE	FALSE	FALSE	TRUE	FALSE	FALSE	FALSE	FALSE	FALSE	FALSE	FALSE	FALSE	Nucleus	2	9	2	7	0	0	0	7	12.22
TNFSF4	ENSG00000117586	TNF superfamily member 4	213	1	FALSE	FALSE	FALSE	FALSE	FALSE	TRUE	FALSE	FALSE	FALSE	FALSE	TRUE	FALSE	Membrane	0	2	1	0	0	2	0	0	12.13
TNFRSF8	ENSG00000120949	TNF receptor superfamily member 8	411	2	FALSE	FALSE	FALSE	FALSE	TRUE	FALSE	FALSE	FALSE	FALSE	FALSE	FALSE	FALSE	[Isoform 1]: Cell membrane	0	4	1	1	0	1	0	1	12.12
NOS3	ENSG00000164867	nitric oxide synthase 3	898	5	FALSE	TRUE	FALSE	TRUE	FALSE	FALSE	FALSE	FALSE	FALSE	FALSE	FALSE	FALSE	Cell membrane	1	2	1	0	2	0	0	0	11.98
NCBP2	ENSG00000114503	nuclear cap binding protein subunit 2	38	3	FALSE	TRUE	FALSE	FALSE	FALSE	FALSE	FALSE	FALSE	FALSE	FALSE	FALSE	FALSE	Nucleus	0	1	11	0	0	1	0	0	11.88
DNMT1	ENSG00000130816	DNA methyltransferase 1	584	5	TRUE	FALSE	FALSE	TRUE	FALSE	FALSE	FALSE	FALSE	FALSE	FALSE	FALSE	FALSE	Nucleus	0	2	3	2	0	0	0	2	11.86
GSK3B	ENSG00000082701	glycogen synthase kinase 3 beta	732	6	TRUE	FALSE	FALSE	TRUE	FALSE	FALSE	FALSE	FALSE	FALSE	FALSE	FALSE	FALSE	Cytoplasm	2	6	3	2	0	0	0	2	11.84
DHFR	ENSG00000228716	dihydrofolate reductase	432	5	TRUE	FALSE	FALSE	TRUE	FALSE	FALSE	FALSE	FALSE	FALSE	FALSE	FALSE	FALSE	Mitochondrion	0	6	2	2	0	0	0	2	11.84
BCL2L1	ENSG00000171552	BCL2 like 1	622	4	FALSE	TRUE	FALSE	TRUE	FALSE	FALSE	FALSE	FALSE	FALSE	FALSE	FALSE	FALSE	[Isoform Bcl-X(L)]: Mitochondrion inner membrane	0	3	1	0	3	0	0	0	11.72
NCBP1	ENSG00000136937	nuclear cap binding protein subunit 1	62	2	FALSE	TRUE	FALSE	FALSE	FALSE	FALSE	FALSE	FALSE	FALSE	FALSE	FALSE	FALSE	Nucleus	0	1	11	0	0	1	0	0	11.62
IFNA17	ENSG00000234829	interferon alpha 17	112	1	FALSE	FALSE	FALSE	FALSE	FALSE	TRUE	FALSE	FALSE	FALSE	FALSE	FALSE	FALSE	Secreted	0	2	2	0	0	2	0	0	11.62
IL22	ENSG00000127318	interleukin 22	562	2	FALSE	FALSE	FALSE	FALSE	FALSE	TRUE	FALSE	FALSE	FALSE	FALSE	FALSE	FALSE	Secreted	0	1	1	0	0	1	0	0	11.62
DNMT3A	ENSG00000119772	DNA methyltransferase 3 alpha	596	4	TRUE	FALSE	FALSE	TRUE	FALSE	FALSE	FALSE	FALSE	FALSE	FALSE	FALSE	FALSE	Nucleus	0	2	3	2	0	0	0	2	11.48
CA1	ENSG00000133742	carbonic anhydrase 1	192	5	TRUE	FALSE	FALSE	TRUE	FALSE	FALSE	FALSE	FALSE	FALSE	FALSE	FALSE	FALSE	Cytoplasm	0	7	1	6	0	0	0	6	11.48
HAVCR2	ENSG00000135077	hepatitis A virus cellular receptor 2	397	3	FALSE	FALSE	FALSE	FALSE	FALSE	TRUE	FALSE	FALSE	FALSE	FALSE	FALSE	FALSE	Membrane	0	2	1	0	1	1	0	0	11.47
IL15	ENSG00000164136	interleukin 15	594	1	FALSE	FALSE	FALSE	FALSE	FALSE	TRUE	FALSE	FALSE	FALSE	FALSE	FALSE	FALSE	[Isoform IL15-S48AA]: Secreted	0	1	1	0	0	1	0	0	11.44
IL12B	ENSG00000113302	interleukin 12B	283	3	FALSE	FALSE	FALSE	FALSE	TRUE	FALSE	FALSE	FALSE	FALSE	FALSE	FALSE	FALSE	Secreted	0	3	1	1	1	1	0	1	11.34
TNFSF13B	ENSG00000102524	TNF superfamily member 13b	506	3	FALSE	FALSE	FALSE	FALSE	TRUE	FALSE	FALSE	FALSE	FALSE	FALSE	TRUE	FALSE	Cell membrane	0	5	1	1	2	0	0	1	11.07
TNFRSF9	ENSG00000049249	TNF receptor superfamily member 9	406	2	FALSE	FALSE	FALSE	FALSE	FALSE	TRUE	FALSE	FALSE	FALSE	FALSE	FALSE	FALSE	Membrane	0	2	1	0	1	1	0	0	11.06
TXN	ENSG00000136810	thioredoxin	342	5	FALSE	TRUE	FALSE	TRUE	FALSE	FALSE	FALSE	FALSE	FALSE	FALSE	FALSE	FALSE	Nucleus	0	1	1	0	0	1	0	0	10.92
IFNA8	ENSG00000120242	interferon alpha 8	40	1	FALSE	FALSE	FALSE	FALSE	FALSE	TRUE	FALSE	FALSE	FALSE	FALSE	FALSE	FALSE	Secreted	0	2	2	0	0	2	0	0	10.9
RRM2B	ENSG00000048392	ribonucleotide reductase regulatory TP53 inducible subunit M2B	235	3	FALSE	TRUE	FALSE	TRUE	FALSE	FALSE	FALSE	FALSE	FALSE	FALSE	FALSE	FALSE	Cytoplasm	0	3	1	0	2	1	0	0	10.85
IFNA5	ENSG00000147873	interferon alpha 5	28	1	FALSE	FALSE	FALSE	FALSE	FALSE	TRUE	FALSE	FALSE	FALSE	FALSE	FALSE	FALSE	Secreted	0	2	2	0	0	2	0	0	10.78
IFNA4	ENSG00000236637	interferon alpha 4	26	1	FALSE	FALSE	FALSE	FALSE	FALSE	TRUE	FALSE	FALSE	FALSE	FALSE	FALSE	FALSE	Secreted	0	2	2	0	0	2	0	0	10.76
IFNA6	ENSG00000120235	interferon alpha 6	25	1	FALSE	FALSE	FALSE	FALSE	FALSE	TRUE	FALSE	FALSE	FALSE	FALSE	FALSE	FALSE	Secreted	0	2	2	0	0	2	0	0	10.75
RXRA	ENSG00000186350	retinoid X receptor alpha	517	5	TRUE	FALSE	FALSE	TRUE	FALSE	FALSE	FALSE	FALSE	FALSE	FALSE	FALSE	FALSE	Nucleus	2	7	2	5	0	0	0	5	10.72
IFNA21	ENSG00000137080	interferon alpha 21	19	1	FALSE	FALSE	FALSE	FALSE	FALSE	TRUE	FALSE	FALSE	FALSE	FALSE	FALSE	FALSE	Secreted	0	2	2	0	0	2	0	0	10.69
PPP2CA	ENSG00000113575	protein phosphatase 2 catalytic subunit alpha	118	3	FALSE	TRUE	FALSE	FALSE	FALSE	FALSE	FALSE	FALSE	FALSE	FALSE	FALSE	FALSE	Cytoplasm	1	1	11	0	0	1	0	0	10.68
IFNA14	ENSG00000228083	interferon alpha 14	18	1	FALSE	FALSE	FALSE	FALSE	FALSE	TRUE	FALSE	FALSE	FALSE	FALSE	FALSE	FALSE	Secreted	0	2	2	0	0	2	0	0	10.68
IFNA10	ENSG00000186803	interferon alpha 10	17	1	FALSE	FALSE	FALSE	FALSE	FALSE	TRUE	FALSE	FALSE	FALSE	FALSE	FALSE	FALSE	Secreted	0	2	2	0	0	2	0	0	10.67
IFNA7	ENSG00000214042	interferon alpha 7	14	1	FALSE	FALSE	FALSE	FALSE	FALSE	TRUE	FALSE	FALSE	FALSE	FALSE	FALSE	FALSE	Secreted	0	2	2	0	0	2	0	0	10.64
IFNA16	ENSG00000147885	interferon alpha 16	13	1	FALSE	FALSE	FALSE	FALSE	FALSE	TRUE	FALSE	FALSE	FALSE	FALSE	FALSE	FALSE	Secreted	0	2	2	0	0	2	0	0	10.63
IL5	ENSG00000113525	interleukin 5	699	2	FALSE	FALSE	FALSE	FALSE	TRUE	FALSE	FALSE	FALSE	FALSE	FALSE	FALSE	FALSE	Secreted	0	2	1	2	0	0	0	2	10.51
IL6R	ENSG00000160712	interleukin 6 receptor	586	3	FALSE	FALSE	FALSE	FALSE	TRUE	FALSE	FALSE	FALSE	FALSE	FALSE	FALSE	FALSE	[Isoform 1]: Cell membrane	1	5	2	3	0	0	0	3	10.39
HCK	ENSG00000101336	HCK proto-oncogene, Src family tyrosine kinase	282	6	TRUE	FALSE	FALSE	TRUE	FALSE	FALSE	FALSE	FALSE	FALSE	FALSE	FALSE	FALSE	[Isoform 1]: Lysosome	0	6	1	2	0	0	0	2	10.34
IFNA13	ENSG00000233816	interferon alpha 13	30	0	Unknown	Unknown	Unknown	Unknown	Unknown	Unknown	Unknown	Unknown	Unknown	Unknown	Unknown	Unknown	Secreted	0	2	2	0	0	2	0	0	10.3
TEK	ENSG00000120156	TEK receptor tyrosine kinase	424	6	TRUE	FALSE	FALSE	TRUE	FALSE	FALSE	FALSE	FALSE	FALSE	FALSE	FALSE	FALSE	Cell membrane	1	7	1	2	0	0	0	2	10.26
CSF3R	ENSG00000119535	colony stimulating factor 3 receptor	472	1	FALSE	FALSE	FALSE	FALSE	FALSE	FALSE	FALSE	FALSE	FALSE	TRUE	FALSE	FALSE	[Isoform 2]: Secreted	0	6	1	3	0	0	0	3	10.25
BIRC3	ENSG00000023445	baculoviral IAP repeat containing 3	373	3	FALSE	TRUE	FALSE	TRUE	FALSE	FALSE	FALSE	FALSE	FALSE	FALSE	FALSE	FALSE	Cytoplasm	0	1	1	0	0	1	0	0	10.23
NPM1	ENSG00000181163	nucleophosmin 1	468	3	TRUE	FALSE	FALSE	TRUE	FALSE	FALSE	FALSE	FALSE	FALSE	FALSE	FALSE	FALSE	Nucleus	0	2	4	2	0	0	0	2	10.2
HMGB1	ENSG00000189403	high mobility group box 1	767	2	FALSE	FALSE	FALSE	FALSE	FALSE	FALSE	FALSE	FALSE	FALSE	FALSE	TRUE	FALSE	Nucleus	0	1	1	0	1	0	0	0	10.17
APEX1	ENSG00000100823	apurinic/apyrimidinic endodeoxyribonuclease 1	260	5	FALSE	TRUE	FALSE	TRUE	FALSE	FALSE	FALSE	FALSE	FALSE	FALSE	FALSE	FALSE	Nucleus	0	1	1	0	0	1	0	0	10.1
THRA	ENSG00000126351	thyroid hormone receptor alpha	498	5	TRUE	FALSE	FALSE	TRUE	FALSE	FALSE	FALSE	FALSE	FALSE	FALSE	FALSE	FALSE	Nucleus	2	6	2	5	0	0	0	5	10.03
TSLP	ENSG00000145777	thymic stromal lymphopoietin	295	2	FALSE	FALSE	FALSE	FALSE	FALSE	TRUE	FALSE	FALSE	FALSE	FALSE	FALSE	FALSE	Secreted	0	2	1	0	1	1	0	0	9.95
IL2RB	ENSG00000100385	interleukin 2 receptor subunit beta	438	3	FALSE	FALSE	FALSE	FALSE	FALSE	FALSE	FALSE	FALSE	FALSE	TRUE	FALSE	FALSE	Cell membrane	0	5	1	2	0	0	0	2	9.9
FYN	ENSG00000010810	FYN proto-oncogene, Src family tyrosine kinase	385	6	TRUE	FALSE	FALSE	TRUE	FALSE	FALSE	FALSE	FALSE	FALSE	FALSE	FALSE	FALSE	Cytoplasm	1	6	3	1	0	0	0	1	9.86
CCL11	ENSG00000172156	C-C motif chemokine ligand 11	379	2	FALSE	FALSE	FALSE	FALSE	FALSE	TRUE	FALSE	FALSE	FALSE	FALSE	FALSE	FALSE	Secreted	0	1	1	0	0	1	0	0	9.79
ESR1	ENSG00000091831	estrogen receptor 1	1614	6	TRUE	FALSE	FALSE	TRUE	FALSE	FALSE	FALSE	TRUE	FALSE	FALSE	FALSE	FALSE	[Isoform 1]: Nucleus	19	41	2	14	0	0	0	14	9.78
MCL1	ENSG00000143384	MCL1 apoptosis regulator, BCL2 family member	478	5	FALSE	TRUE	FALSE	TRUE	FALSE	FALSE	FALSE	FALSE	FALSE	FALSE	FALSE	FALSE	Membrane	0	2	1	0	2	0	0	0	9.78
FCGR1A	ENSG00000150337	Fc gamma receptor Ia	275	3	FALSE	FALSE	FALSE	FALSE	FALSE	TRUE	FALSE	FALSE	FALSE	FALSE	FALSE	FALSE	Cell membrane	0	1	2	0	0	1	0	0	9.75
RBX1	ENSG00000100387	ring-box 1	221	3	TRUE	FALSE	FALSE	FALSE	FALSE	FALSE	FALSE	FALSE	FALSE	FALSE	FALSE	FALSE	Cytoplasm	0	4	5	3	0	0	0	3	9.74
IL17F	ENSG00000112116	interleukin 17F	320	1	FALSE	FALSE	FALSE	FALSE	FALSE	TRUE	FALSE	FALSE	FALSE	FALSE	TRUE	FALSE	Secreted	0	2	1	0	1	1	0	0	9.7
PPIA	ENSG00000196262	peptidylprolyl isomerase A	466	5	FALSE	FALSE	FALSE	TRUE	FALSE	FALSE	FALSE	FALSE	FALSE	TRUE	FALSE	FALSE	Cytoplasm	0	3	1	1	0	0	0	1	9.67
IL6ST	ENSG00000134352	interleukin 6 cytokine family signal transducer	665	3	FALSE	FALSE	FALSE	FALSE	TRUE	FALSE	FALSE	FALSE	FALSE	FALSE	FALSE	FALSE	[Isoform 1]: Cell membrane	0	1	1	1	0	0	0	1	9.66
PPP2CB	ENSG00000104695	protein phosphatase 2 catalytic subunit beta	64	1	FALSE	TRUE	FALSE	FALSE	FALSE	FALSE	FALSE	FALSE	FALSE	FALSE	FALSE	FALSE	Cytoplasm	0	1	8	0	0	1	0	0	9.64
IL2RG	ENSG00000147168	interleukin 2 receptor subunit gamma	363	2	FALSE	FALSE	FALSE	FALSE	FALSE	FALSE	FALSE	FALSE	FALSE	FALSE	TRUE	FALSE	Cell membrane	0	1	1	0	0	1	0	0	9.63
IL23A	ENSG00000110944	interleukin 23 subunit alpha	359	3	FALSE	FALSE	FALSE	FALSE	TRUE	FALSE	FALSE	FALSE	FALSE	FALSE	FALSE	FALSE	Secreted	0	5	1	3	0	0	0	3	9.62
ITK	ENSG00000113263	IL2 inducible T cell kinase	357	5	TRUE	FALSE	FALSE	TRUE	FALSE	FALSE	FALSE	FALSE	FALSE	FALSE	FALSE	FALSE	Cytoplasm	0	3	1	2	1	0	0	2	9.59
BIRC2	ENSG00000110330	baculoviral IAP repeat containing 2	196	5	FALSE	TRUE	FALSE	TRUE	FALSE	FALSE	FALSE	FALSE	FALSE	FALSE	FALSE	FALSE	Cytoplasm	0	1	1	0	0	1	0	0	9.46
SNAP25	ENSG00000132639	synaptosome associated protein 25	427	0	FALSE	FALSE	FALSE	FALSE	FALSE	FALSE	FALSE	FALSE	FALSE	TRUE	FALSE	FALSE	Cytoplasm	0	5	1	4	0	0	0	4	9.31
IL9	ENSG00000145839	interleukin 9	360	1	FALSE	FALSE	FALSE	FALSE	FALSE	TRUE	FALSE	FALSE	FALSE	FALSE	FALSE	FALSE	Secreted	0	1	1	0	0	1	0	0	9.1
FCER2	ENSG00000104921	Fc epsilon receptor II	305	2	FALSE	FALSE	FALSE	TRUE	FALSE	TRUE	FALSE	FALSE	FALSE	FALSE	FALSE	FALSE	Cell membrane	0	1	1	0	0	1	0	0	9.05
CD27	ENSG00000139193	CD27 molecule	353	1	FALSE	FALSE	FALSE	FALSE	FALSE	TRUE	FALSE	FALSE	FALSE	FALSE	FALSE	FALSE	Membrane	0	1	1	0	0	1	0	0	9.03
GRB2	ENSG00000177885	growth factor receptor bound protein 2	150	3	FALSE	FALSE	FALSE	FALSE	FALSE	FALSE	FALSE	FALSE	FALSE	FALSE	FALSE	FALSE	Nucleus	0	1	3	0	0	1	0	0	9
NOD2	ENSG00000167207	nucleotide binding oligomerization domain containing 2	497	4	TRUE	FALSE	FALSE	TRUE	FALSE	FALSE	FALSE	FALSE	FALSE	FALSE	FALSE	FALSE	Cell membrane	0	2	1	1	0	0	0	1	8.98
IL21	ENSG00000138684	interleukin 21	293	2	FALSE	FALSE	FALSE	FALSE	FALSE	FALSE	FALSE	FALSE	FALSE	FALSE	TRUE	FALSE	Secreted	0	1	1	0	0	1	0	0	8.93
CASP6	ENSG00000138794	caspase 6	141	5	FALSE	TRUE	FALSE	TRUE	FALSE	FALSE	FALSE	FALSE	FALSE	FALSE	FALSE	FALSE	Cytoplasm	0	1	1	0	0	1	0	0	8.91
TNFSF13	ENSG00000161955	TNF superfamily member 13	286	2	FALSE	FALSE	FALSE	FALSE	FALSE	FALSE	FALSE	FALSE	FALSE	FALSE	TRUE	FALSE	Secreted	0	1	1	0	0	1	0	0	8.86
NFKB2	ENSG00000077150	nuclear factor kappa B subunit 2	483	3	FALSE	TRUE	FALSE	FALSE	FALSE	FALSE	FALSE	FALSE	FALSE	FALSE	FALSE	FALSE	Nucleus	0	1	3	0	1	0	0	0	8.83
LCK	ENSG00000182866	LCK proto-oncogene, Src family tyrosine kinase	470	6	TRUE	FALSE	FALSE	TRUE	FALSE	FALSE	FALSE	FALSE	FALSE	FALSE	FALSE	FALSE	Cell membrane	3	8	3	3	0	0	0	3	8.73
EGLN1	ENSG00000135766	egl-9 family hypoxia inducible factor 1	223	4	FALSE	TRUE	FALSE	TRUE	FALSE	FALSE	FALSE	FALSE	FALSE	FALSE	FALSE	FALSE	Cytoplasm	0	4	1	0	4	0	0	0	8.73
RELA	ENSG00000173039	RELA proto-oncogene, NF-kB subunit	366	4	FALSE	TRUE	FALSE	TRUE	FALSE	FALSE	FALSE	FALSE	FALSE	FALSE	FALSE	FALSE	Nucleus	0	1	4	0	1	0	0	0	8.66
CUL4A	ENSG00000139842	cullin 4A	310	3	TRUE	FALSE	FALSE	FALSE	FALSE	FALSE	FALSE	FALSE	FALSE	FALSE	FALSE	FALSE	Nucleoplasm	0	4	1	3	0	0	0	3	8.63
GHR	ENSG00000112964	growth hormone receptor	407	1	TRUE	FALSE	FALSE	FALSE	FALSE	FALSE	FALSE	FALSE	FALSE	TRUE	FALSE	FALSE	Cell membrane	0	4	1	3	0	0	0	3	8.6
CEP290	ENSG00000198707	centrosomal protein 290	297	0	FALSE	FALSE	FALSE	FALSE	FALSE	FALSE	FALSE	FALSE	FALSE	FALSE	FALSE	FALSE	Cytoplasm	0	1	2	0	0	1	0	0	8.47
TNFSF11	ENSG00000120659	TNF superfamily member 11	645	1	FALSE	FALSE	FALSE	FALSE	TRUE	FALSE	FALSE	FALSE	FALSE	FALSE	FALSE	FALSE	[Isoform 1]: Cell membrane	0	1	1	1	0	0	0	1	8.46
PPP5C	ENSG00000011485	protein phosphatase 5 catalytic subunit	79	5	FALSE	TRUE	FALSE	TRUE	FALSE	FALSE	FALSE	FALSE	FALSE	FALSE	FALSE	FALSE	Nucleus	0	1	1	0	0	1	0	0	8.29
HLA-DRB5	ENSG00000198502	major histocompatibility complex, class II, DR beta 5	126	3	FALSE	FALSE	FALSE	FALSE	FALSE	TRUE	FALSE	FALSE	FALSE	FALSE	FALSE	FALSE	Cell membrane	0	1	2	0	0	1	0	0	8.26
HDAC1	ENSG00000116478	histone deacetylase 1	419	3	TRUE	FALSE	FALSE	TRUE	FALSE	FALSE	FALSE	FALSE	FALSE	TRUE	FALSE	FALSE	Nucleus	5	11	8	5	1	0	0	5	8.24
CSF2RB	ENSG00000100368	colony stimulating factor 2 receptor subunit beta	217	2	FALSE	FALSE	FALSE	FALSE	FALSE	TRUE	FALSE	FALSE	FALSE	FALSE	FALSE	FALSE	Membrane	0	1	1	0	0	1	0	0	8.17
CD80	ENSG00000121594	CD80 molecule	463	1	FALSE	FALSE	FALSE	FALSE	FALSE	TRUE	FALSE	FALSE	FALSE	TRUE	FALSE	FALSE	Membrane	0	3	1	2	0	0	0	2	8.15
TNFRSF13C	ENSG00000159958	TNF receptor superfamily member 13C	260	1	FALSE	FALSE	FALSE	FALSE	FALSE	TRUE	FALSE	FALSE	FALSE	FALSE	FALSE	FALSE	Membrane	0	1	1	0	0	1	0	0	8.1
MMP1	ENSG00000196611	matrix metallopeptidase 1	700	6	TRUE	FALSE	FALSE	TRUE	FALSE	FALSE	FALSE	FALSE	FALSE	FALSE	FALSE	FALSE	Secreted	3	5	1	2	0	0	0	2	8.02
MKNK2	ENSG00000099875	MAPK interacting serine/threonine kinase 2	47	5	FALSE	TRUE	FALSE	TRUE	FALSE	FALSE	FALSE	FALSE	FALSE	FALSE	FALSE	FALSE	[Isoform 2]: Nucleus	0	1	1	0	0	1	0	0	7.97
IL1RL2	ENSG00000115598	interleukin 1 receptor like 2	147	1	FALSE	FALSE	FALSE	FALSE	FALSE	TRUE	FALSE	FALSE	FALSE	FALSE	FALSE	FALSE	Membrane	0	2	1	0	1	1	0	0	7.97
IFNGR1	ENSG00000027697	interferon gamma receptor 1	378	3	FALSE	FALSE	FALSE	FALSE	FALSE	FALSE	FALSE	FALSE	FALSE	TRUE	FALSE	FALSE	Cell membrane	0	1	3	1	0	0	0	1	7.79
MKNK1	ENSG00000079277	MAPK interacting serine/threonine kinase 1	77	4	FALSE	TRUE	FALSE	TRUE	FALSE	FALSE	FALSE	FALSE	FALSE	FALSE	FALSE	FALSE	[Isoform 2]: Cytoplasm	0	1	1	0	0	1	0	0	7.77
COL1A2	ENSG00000164692	collagen type I alpha 2 chain	518	0	FALSE	FALSE	FALSE	FALSE	FALSE	FALSE	FALSE	FALSE	FALSE	TRUE	FALSE	FALSE	Secreted	0	2	1	2	0	0	0	2	7.7
TXNRD1	ENSG00000198431	thioredoxin reductase 1	154	5	TRUE	FALSE	FALSE	TRUE	FALSE	FALSE	FALSE	FALSE	FALSE	FALSE	FALSE	FALSE	[Isoform 1]: Cytoplasm	0	3	1	2	1	0	0	2	7.56
CSNK2A1	ENSG00000101266	casein kinase 2 alpha 1	104	5	FALSE	TRUE	FALSE	TRUE	FALSE	FALSE	FALSE	FALSE	FALSE	FALSE	FALSE	FALSE	Nucleus	1	1	3	0	0	1	0	0	7.54
DDB1	ENSG00000167986	damage specific DNA binding protein 1	199	3	TRUE	FALSE	FALSE	FALSE	FALSE	FALSE	FALSE	FALSE	FALSE	FALSE	FALSE	FALSE	Cytoplasm	0	4	1	3	0	0	0	3	7.52
IL1RAP	ENSG00000196083	interleukin 1 receptor accessory protein	97	1	FALSE	FALSE	FALSE	FALSE	FALSE	TRUE	FALSE	FALSE	FALSE	FALSE	FALSE	FALSE	[Isoform 1]: Cell membrane	0	2	1	0	1	1	0	0	7.47
CD86	ENSG00000114013	CD86 molecule	489	0	FALSE	FALSE	FALSE	FALSE	FALSE	FALSE	FALSE	FALSE	FALSE	TRUE	FALSE	FALSE	Cell membrane	0	2	1	2	0	0	0	2	7.41
IL15RA	ENSG00000134470	interleukin 15 receptor subunit alpha	184	1	FALSE	FALSE	FALSE	FALSE	FALSE	FALSE	FALSE	FALSE	FALSE	FALSE	TRUE	FALSE	Membrane	0	1	1	0	0	1	0	0	7.34
XPO1	ENSG00000082898	exportin 1	280	4	TRUE	FALSE	FALSE	FALSE	FALSE	FALSE	FALSE	FALSE	FALSE	FALSE	FALSE	FALSE	Cytoplasm	0	1	3	1	0	0	0	1	7.31
POLR1A	ENSG00000068654	RNA polymerase I subunit A	28	3	FALSE	TRUE	FALSE	FALSE	FALSE	FALSE	FALSE	FALSE	FALSE	FALSE	FALSE	FALSE	Nucleus	0	1	2	0	0	1	0	0	7.28
RRM2	ENSG00000171848	ribonucleotide reductase regulatory subunit M2	227	2	TRUE	FALSE	FALSE	TRUE	FALSE	FALSE	FALSE	FALSE	FALSE	FALSE	FALSE	FALSE	Cytoplasm	0	5	2	1	0	0	0	1	7.28
CSNK1E	ENSG00000213923	casein kinase 1 epsilon	71	4	TRUE	FALSE	FALSE	TRUE	FALSE	FALSE	FALSE	FALSE	FALSE	FALSE	FALSE	FALSE	Cytoplasm	0	2	5	2	0	0	0	2	7.23
HSPA8	ENSG00000109971	heat shock protein family A (Hsp70) member 8	222	2	FALSE	FALSE	FALSE	FALSE	FALSE	FALSE	FALSE	FALSE	FALSE	FALSE	TRUE	FALSE	Cytoplasm	0	2	4	0	2	0	0	0	7.22
YES1	ENSG00000176105	YES proto-oncogene 1, Src family tyrosine kinase	168	3	TRUE	FALSE	FALSE	TRUE	FALSE	FALSE	FALSE	FALSE	FALSE	FALSE	FALSE	FALSE	Cell membrane	0	6	1	1	0	0	0	1	7.19
IRAK4	ENSG00000198001	interleukin 1 receptor associated kinase 4	160	5	FALSE	TRUE	FALSE	TRUE	FALSE	FALSE	FALSE	FALSE	TRUE	FALSE	FALSE	FALSE	Cytoplasm	1	1	1	0	0	1	0	0	7.1
IL20	ENSG00000162891	interleukin 20	109	2	FALSE	FALSE	FALSE	FALSE	FALSE	TRUE	FALSE	FALSE	FALSE	FALSE	FALSE	FALSE	Secreted	0	1	1	0	0	1	0	0	7.09
TNFSF14	ENSG00000125735	TNF superfamily member 14	206	0	FALSE	FALSE	FALSE	FALSE	FALSE	FALSE	FALSE	FALSE	FALSE	FALSE	TRUE	FALSE	[Tumor necrosis factor ligand superfamily member 14, membrane form]: Cell membrane	0	1	1	0	0	1	0	0	7.06
IL4R	ENSG00000077238	interleukin 4 receptor	452	1	FALSE	FALSE	FALSE	FALSE	TRUE	FALSE	FALSE	FALSE	FALSE	FALSE	TRUE	FALSE	Cell membrane	0	2	1	1	0	0	0	1	7.03
CASP2	ENSG00000106144	caspase 2	142	5	FALSE	TRUE	FALSE	TRUE	FALSE	FALSE	FALSE	FALSE	FALSE	FALSE	FALSE	FALSE	Mitochondria	1	1	1	0	0	1	0	0	6.92
NDUFA4	ENSG00000189043	NDUFA4 mitochondrial complex associated	224	3	TRUE	FALSE	FALSE	TRUE	FALSE	FALSE	FALSE	FALSE	FALSE	FALSE	FALSE	FALSE	Mitochondrion inner membrane	0	3	1	2	0	0	0	2	6.76
EGLN3	ENSG00000129521	egl-9 family hypoxia inducible factor 3	166	3	FALSE	TRUE	FALSE	TRUE	FALSE	FALSE	FALSE	FALSE	FALSE	FALSE	FALSE	FALSE	Nucleus	0	3	1	0	3	0	0	0	6.66
MMP3	ENSG00000149968	matrix metallopeptidase 3	605	6	FALSE	TRUE	FALSE	TRUE	FALSE	FALSE	FALSE	FALSE	FALSE	FALSE	FALSE	FALSE	Secreted	2	1	1	0	1	0	0	0	6.55
EGLN2	ENSG00000269858	egl-9 family hypoxia inducible factor 2	91	4	FALSE	TRUE	FALSE	TRUE	FALSE	FALSE	FALSE	FALSE	FALSE	FALSE	FALSE	FALSE	Nucleus	0	3	1	0	3	0	0	0	6.41
PTK6	ENSG00000101213	protein tyrosine kinase 6	189	4	TRUE	FALSE	FALSE	TRUE	FALSE	FALSE	FALSE	FALSE	FALSE	FALSE	FALSE	FALSE	Cytoplasm	0	1	3	1	0	0	0	1	6.4
HLA-DRB4	ENSG00000231021	major histocompatibility complex, class II, DR beta 4	39	1	FALSE	FALSE	FALSE	FALSE	FALSE	TRUE	FALSE	FALSE	FALSE	FALSE	FALSE	FALSE	No data	0	1	2	0	0	1	0	0	6.39
TNFRSF1A	ENSG00000067182	TNF receptor superfamily member 1A	710	4	FALSE	FALSE	FALSE	TRUE	FALSE	FALSE	FALSE	FALSE	FALSE	FALSE	FALSE	FALSE	Cell membrane	7	1	1	0	0	0	1	0	6.1
MAPKAPK5	ENSG00000089022	MAPK activated protein kinase 5	92	3	FALSE	TRUE	FALSE	TRUE	FALSE	FALSE	FALSE	FALSE	FALSE	FALSE	FALSE	FALSE	Cytoplasm	1	1	2	0	0	1	0	0	5.92
IL17RA	ENSG00000177663	interleukin 17 receptor A	327	2	FALSE	FALSE	FALSE	FALSE	TRUE	FALSE	FALSE	FALSE	FALSE	FALSE	FALSE	FALSE	[Isoform 1]: Cell membrane	0	1	1	1	0	0	0	1	5.78
CSF2RA	ENSG00000198223	colony stimulating factor 2 receptor subunit alpha	247	2	FALSE	FALSE	FALSE	FALSE	FALSE	TRUE	FALSE	FALSE	FALSE	TRUE	FALSE	FALSE	Cell membrane	0	2	1	1	0	0	0	1	5.48
NR1H4	ENSG00000012504	nuclear receptor subfamily 1 group H member 4	433	5	TRUE	FALSE	FALSE	TRUE	FALSE	FALSE	FALSE	FALSE	FALSE	FALSE	TRUE	FALSE	Nucleus	4	8	2	3	0	0	0	3	5.36
MAPK11	ENSG00000185386	mitogen-activated protein kinase 11	127	5	TRUE	FALSE	FALSE	TRUE	FALSE	FALSE	FALSE	FALSE	FALSE	FALSE	FALSE	FALSE	Cytoplasm	1	2	3	1	1	0	0	1	5.28
EEF1A2	ENSG00000101210	eukaryotic translation elongation factor 1 alpha 2	257	1	FALSE	TRUE	FALSE	FALSE	FALSE	FALSE	FALSE	FALSE	FALSE	FALSE	FALSE	FALSE	Nucleus	0	1	2	0	1	0	0	0	5.07
LAMA5	ENSG00000130702	laminin subunit alpha 5	340	0	FALSE	FALSE	FALSE	FALSE	FALSE	FALSE	FALSE	FALSE	FALSE	TRUE	FALSE	FALSE	Secreted	0	1	1	1	0	0	0	1	4.91
PDK1	ENSG00000152256	pyruvate dehydrogenase kinase 1	86	5	TRUE	FALSE	FALSE	TRUE	FALSE	FALSE	FALSE	FALSE	FALSE	FALSE	FALSE	FALSE	Mitochondrion matrix	0	1	1	1	0	0	0	1	4.87
CASP10	ENSG00000003400	caspase 10	85	2	FALSE	TRUE	FALSE	FALSE	FALSE	FALSE	FALSE	FALSE	FALSE	FALSE	FALSE	FALSE	Golgi apparatus	1	1	1	0	0	1	0	0	4.85
E2F4	ENSG00000205250	E2F transcription factor 4	154	0	FALSE	FALSE	FALSE	FALSE	FALSE	FALSE	FALSE	FALSE	FALSE	FALSE	TRUE	FALSE	Nucleus	0	1	4	0	1	0	0	0	4.54
E2F3	ENSG00000112242	E2F transcription factor 3	189	0	FALSE	FALSE	FALSE	FALSE	FALSE	FALSE	FALSE	FALSE	FALSE	FALSE	TRUE	FALSE	Nucleus	0	1	3	0	1	0	0	0	4.39
E2F1	ENSG00000101412	E2F transcription factor 1	183	1	FALSE	FALSE	FALSE	FALSE	FALSE	FALSE	FALSE	FALSE	FALSE	FALSE	TRUE	FALSE	Nucleus	1	1	6	0	1	0	0	0	4.33
IL31RA	ENSG00000164509	interleukin 31 receptor A	179	2	FALSE	FALSE	FALSE	FALSE	FALSE	TRUE	FALSE	FALSE	FALSE	FALSE	FALSE	FALSE	Cell membrane	0	1	1	0	1	0	0	0	4.29
TEC	ENSG00000135605	tec protein tyrosine kinase	108	3	FALSE	TRUE	FALSE	TRUE	FALSE	FALSE	FALSE	FALSE	FALSE	FALSE	FALSE	FALSE	Cytoplasm	0	1	1	0	1	0	0	0	4.08
UBA3	ENSG00000144744	ubiquitin like modifier activating enzyme 3	55	4	FALSE	TRUE	FALSE	FALSE	FALSE	FALSE	FALSE	FALSE	FALSE	FALSE	FALSE	FALSE	Cytosol	0	1	1	0	1	0	0	0	4.05
IL10RB	ENSG00000243646	interleukin 10 receptor subunit beta	233	0	FALSE	FALSE	FALSE	FALSE	FALSE	FALSE	FALSE	FALSE	FALSE	FALSE	TRUE	FALSE	Membrane	0	1	1	0	1	0	0	0	3.83
IL5RA	ENSG00000091181	interleukin 5 receptor subunit alpha	215	0	FALSE	FALSE	FALSE	FALSE	FALSE	FALSE	FALSE	FALSE	FALSE	FALSE	FALSE	FALSE	Membrane	0	1	1	1	0	0	0	1	3.66
IL13RA2	ENSG00000123496	interleukin 13 receptor subunit alpha 2	207	0	FALSE	FALSE	FALSE	FALSE	FALSE	FALSE	FALSE	FALSE	FALSE	FALSE	TRUE	FALSE	Membrane	0	1	1	0	1	0	0	0	3.57
IL13RA1	ENSG00000131724	interleukin 13 receptor subunit alpha 1	196	0	FALSE	FALSE	FALSE	FALSE	FALSE	FALSE	FALSE	FALSE	FALSE	FALSE	TRUE	FALSE	Membrane	0	1	1	0	1	0	0	0	3.46
E2F5	ENSG00000133740	E2F transcription factor 5	69	0	FALSE	FALSE	FALSE	FALSE	FALSE	FALSE	FALSE	FALSE	FALSE	FALSE	TRUE	FALSE	Nucleus	0	1	3	0	1	0	0	0	3.19
IL11RA	ENSG00000137070	interleukin 11 receptor subunit alpha	114	1	FALSE	FALSE	FALSE	FALSE	FALSE	FALSE	FALSE	FALSE	FALSE	TRUE	FALSE	FALSE	[Interleukin-11 receptor subunit alpha]: Membrane	0	1	1	1	0	0	0	1	3.15
PPARA	ENSG00000186951	peroxisome proliferator activated receptor alpha	754	5	TRUE	FALSE	FALSE	TRUE	FALSE	FALSE	FALSE	FALSE	FALSE	FALSE	FALSE	FALSE	Nucleus	12	25	2	7	0	0	0	7	3.11
E2F6	ENSG00000169016	E2F transcription factor 6	101	0	FALSE	FALSE	FALSE	FALSE	FALSE	FALSE	FALSE	FALSE	FALSE	FALSE	TRUE	FALSE	Nucleus	0	1	2	0	1	0	0	0	3.01
VAMP2	ENSG00000220205	vesicle associated membrane protein 2	112	0	FALSE	FALSE	FALSE	FALSE	FALSE	FALSE	FALSE	FALSE	FALSE	TRUE	FALSE	FALSE	Cytoplasmic vesicle	0	1	1	1	0	0	0	1	2.63
E2F7	ENSG00000165891	E2F transcription factor 7	96	0	FALSE	FALSE	FALSE	FALSE	FALSE	FALSE	FALSE	FALSE	FALSE	FALSE	TRUE	FALSE	Nucleus	0	1	1	0	1	0	0	0	2.46
IFNLR1	ENSG00000185436	interferon lambda receptor 1	92	0	FALSE	FALSE	FALSE	FALSE	FALSE	FALSE	FALSE	FALSE	FALSE	FALSE	TRUE	FALSE	Membrane	0	1	1	0	1	0	0	0	2.42
E2F8	ENSG00000129173	E2F transcription factor 8	86	0	FALSE	FALSE	FALSE	FALSE	FALSE	FALSE	FALSE	FALSE	FALSE	FALSE	TRUE	FALSE	Nucleus	0	1	1	0	1	0	0	0	2.36
PPARG	ENSG00000132170	peroxisome proliferator activated receptor gamma	1132	5	TRUE	FALSE	FALSE	TRUE	FALSE	FALSE	FALSE	FALSE	FALSE	FALSE	FALSE	FALSE	Nucleus	18	35	2	7	0	0	0	7	-0.11
PTGS2	ENSG00000073756	prostaglandin-endoperoxide synthase 2	1455	4	TRUE	FALSE	FALSE	TRUE	FALSE	FALSE	FALSE	FALSE	FALSE	TRUE	FALSE	FALSE	Microsome membrane	37	75	1	11	0	0	0	11	-13.84
OPRM1	ENSG00000112038	opioid receptor mu 1	469	4	TRUE	FALSE	FALSE	TRUE	FALSE	FALSE	FALSE	FALSE	FALSE	FALSE	TRUE	FALSE	Cell membrane	38	84	1	20	0	0	0	20	-16.61
PTAFR	ENSG00000169403	platelet activating factor receptor	144	4	FALSE	TRUE	FALSE	TRUE	FALSE	FALSE	FALSE	FALSE	FALSE	FALSE	FALSE	FALSE	Cell membrane	12	1	2	0	1	0	0	0	-18.56
MAOA	ENSG00000189221	monoamine oxidase A	267	4	TRUE	FALSE	FALSE	TRUE	FALSE	FALSE	FALSE	FALSE	FALSE	FALSE	FALSE	FALSE	Mitochondrion outer membrane	20	12	1	9	0	0	0	9	-24.24
NR3C1	ENSG00000113580	nuclear receptor subfamily 3 group C member 1	1145	5	TRUE	FALSE	FALSE	TRUE	FALSE	FALSE	FALSE	FALSE	FALSE	FALSE	FALSE	FALSE	[Isoform Alpha]: Cytoplasm	42	71	2	15	0	0	0	15	-25.9
OPRD1	ENSG00000116329	opioid receptor delta 1	225	5	TRUE	FALSE	FALSE	TRUE	FALSE	FALSE	FALSE	FALSE	FALSE	FALSE	FALSE	FALSE	Cell membrane	32	26	1	9	0	0	0	9	-41.16
AR	ENSG00000169083	androgen receptor	1027	5	TRUE	FALSE	FALSE	TRUE	FALSE	FALSE	FALSE	TRUE	FALSE	FALSE	FALSE	FALSE	Nucleus	40	34	2	12	0	0	0	12	-43.11
