# Supplementary material for: Pathway2Targets: an open-source pathway-based approach to repurpose therapeutic drugs and prioritize human targets
Source: PeerJ. 2023 Sep 29;11:e16088. doi: 10.7717/peerj.16088 (PMC10544355; doi:10.7717/peerj.16088)
Supplement: Supplemental Information 7 [file peerj-11-16088-s007.xlsx]

## Sheet: SuppTable5-CRC_TreatmentsEarly
Target_Symbol	Target_ID	Target_Name	Associated_Disease_Count	Tractability_Count	sm_approved	sm_advancedClinical	sm_phase1	ab_approved	ab_advancedClinical	ab_phase1	pr_approved	pr_advancedClinical	pr_phase1	oc_approved	oc_advancedClinical	oc_phase1	Subcellular_Location	Safety_Liabilities	Number_Unique_Drugs	Drug_ID	Drug_Name	Is_FDA_Approved	Highest_Clinical_Trial_Phase	Has_Been_Withdrawn	Pathway_DB	Pathway_Name	Target_in_Pathways	num_Approved_Drugs	num_Phase3	num_Phase2	num_Phase1	num_Phase4	Weighted_Score
EGFR	ENSG00000146648	epidermal growth factor receptor	1729	7	TRUE	FALSE	FALSE	TRUE	TRUE	FALSE	FALSE	FALSE	FALSE	FALSE	TRUE	FALSE	Cell membrane	2	72	CHEMBL3353410	OSIMERTINIB	TRUE	4	FALSE	KEGG	HIF-1 signaling pathway	1	14	2	0	0	14	61.43
EGFR	ENSG00000146648	epidermal growth factor receptor	1729	7	TRUE	FALSE	FALSE	TRUE	TRUE	FALSE	FALSE	FALSE	FALSE	FALSE	TRUE	FALSE	Cell membrane	2	72	CHEMBL1173655	AFATINIB	TRUE	4	FALSE	KEGG	HIF-1 signaling pathway	1	14	2	0	0	14	61.43
EGFR	ENSG00000146648	epidermal growth factor receptor	1729	7	TRUE	FALSE	FALSE	TRUE	TRUE	FALSE	FALSE	FALSE	FALSE	FALSE	TRUE	FALSE	Cell membrane	2	72	CHEMBL1201577	CETUXIMAB	TRUE	4	FALSE	KEGG	HIF-1 signaling pathway	1	14	2	0	0	14	61.43
EGFR	ENSG00000146648	epidermal growth factor receptor	1729	7	TRUE	FALSE	FALSE	TRUE	TRUE	FALSE	FALSE	FALSE	FALSE	FALSE	TRUE	FALSE	Cell membrane	2	72	CHEMBL1201577	CETUXIMAB	TRUE	4	FALSE	KEGG	HIF-1 signaling pathway	1	14	2	0	0	14	61.43
EGFR	ENSG00000146648	epidermal growth factor receptor	1729	7	TRUE	FALSE	FALSE	TRUE	TRUE	FALSE	FALSE	FALSE	FALSE	FALSE	TRUE	FALSE	Cell membrane	2	72	CHEMBL2110732	DACOMITINIB	TRUE	4	FALSE	KEGG	HIF-1 signaling pathway	1	14	2	0	0	14	61.43
EGFR	ENSG00000146648	epidermal growth factor receptor	1729	7	TRUE	FALSE	FALSE	TRUE	TRUE	FALSE	FALSE	FALSE	FALSE	FALSE	TRUE	FALSE	Cell membrane	2	72	CHEMBL2108359	NIMOTUZUMAB	FALSE	3	FALSE	KEGG	HIF-1 signaling pathway	1	14	2	0	0	14	61.43
EGFR	ENSG00000146648	epidermal growth factor receptor	1729	7	TRUE	FALSE	FALSE	TRUE	TRUE	FALSE	FALSE	FALSE	FALSE	FALSE	TRUE	FALSE	Cell membrane	2	72	CHEMBL4297774	AMIVANTAMAB	TRUE	4	FALSE	KEGG	HIF-1 signaling pathway	1	14	2	0	0	14	61.43
EGFR	ENSG00000146648	epidermal growth factor receptor	1729	7	TRUE	FALSE	FALSE	TRUE	TRUE	FALSE	FALSE	FALSE	FALSE	FALSE	TRUE	FALSE	Cell membrane	2	72	CHEMBL1173655	AFATINIB	TRUE	4	FALSE	KEGG	HIF-1 signaling pathway	1	14	2	0	0	14	61.43
EGFR	ENSG00000146648	epidermal growth factor receptor	1729	7	TRUE	FALSE	FALSE	TRUE	TRUE	FALSE	FALSE	FALSE	FALSE	FALSE	TRUE	FALSE	Cell membrane	2	72	CHEMBL554	LAPATINIB	TRUE	4	FALSE	KEGG	HIF-1 signaling pathway	1	14	2	0	0	14	61.43
EGFR	ENSG00000146648	epidermal growth factor receptor	1729	7	TRUE	FALSE	FALSE	TRUE	TRUE	FALSE	FALSE	FALSE	FALSE	FALSE	TRUE	FALSE	Cell membrane	2	72	CHEMBL2105719	DACOMITINIB	TRUE	4	FALSE	KEGG	HIF-1 signaling pathway	1	14	2	0	0	14	61.43
EGFR	ENSG00000146648	epidermal growth factor receptor	1729	7	TRUE	FALSE	FALSE	TRUE	TRUE	FALSE	FALSE	FALSE	FALSE	FALSE	TRUE	FALSE	Cell membrane	2	72	CHEMBL1201577	CETUXIMAB	TRUE	4	FALSE	KEGG	HIF-1 signaling pathway	1	14	2	0	0	14	61.43
EGFR	ENSG00000146648	epidermal growth factor receptor	1729	7	TRUE	FALSE	FALSE	TRUE	TRUE	FALSE	FALSE	FALSE	FALSE	FALSE	TRUE	FALSE	Cell membrane	2	72	CHEMBL553	ERLOTINIB	TRUE	4	FALSE	KEGG	HIF-1 signaling pathway	1	14	2	0	0	14	61.43
EGFR	ENSG00000146648	epidermal growth factor receptor	1729	7	TRUE	FALSE	FALSE	TRUE	TRUE	FALSE	FALSE	FALSE	FALSE	FALSE	TRUE	FALSE	Cell membrane	2	72	CHEMBL939	GEFITINIB	TRUE	4	FALSE	KEGG	HIF-1 signaling pathway	1	14	2	0	0	14	61.43
EGFR	ENSG00000146648	epidermal growth factor receptor	1729	7	TRUE	FALSE	FALSE	TRUE	TRUE	FALSE	FALSE	FALSE	FALSE	FALSE	TRUE	FALSE	Cell membrane	2	72	CHEMBL553	ERLOTINIB	TRUE	4	FALSE	KEGG	HIF-1 signaling pathway	1	14	2	0	0	14	61.43
EGFR	ENSG00000146648	epidermal growth factor receptor	1729	7	TRUE	FALSE	FALSE	TRUE	TRUE	FALSE	FALSE	FALSE	FALSE	FALSE	TRUE	FALSE	Cell membrane	2	72	CHEMBL1201827	PANITUMUMAB	TRUE	4	FALSE	KEGG	HIF-1 signaling pathway	1	14	2	0	0	14	61.43
EGFR	ENSG00000146648	epidermal growth factor receptor	1729	7	TRUE	FALSE	FALSE	TRUE	TRUE	FALSE	FALSE	FALSE	FALSE	FALSE	TRUE	FALSE	Cell membrane	2	72	CHEMBL1201179	LAPATINIB DITOSYLATE	TRUE	4	FALSE	KEGG	HIF-1 signaling pathway	1	14	2	0	0	14	61.43
EGFR	ENSG00000146648	epidermal growth factor receptor	1729	7	TRUE	FALSE	FALSE	TRUE	TRUE	FALSE	FALSE	FALSE	FALSE	FALSE	TRUE	FALSE	Cell membrane	2	72	CHEMBL3545311	BRIGATINIB	TRUE	4	FALSE	KEGG	HIF-1 signaling pathway	1	14	2	0	0	14	61.43
EGFR	ENSG00000146648	epidermal growth factor receptor	1729	7	TRUE	FALSE	FALSE	TRUE	TRUE	FALSE	FALSE	FALSE	FALSE	FALSE	TRUE	FALSE	Cell membrane	2	72	CHEMBL1743047	NECITUMUMAB	TRUE	4	FALSE	KEGG	HIF-1 signaling pathway	1	14	2	0	0	14	61.43
EGFR	ENSG00000146648	epidermal growth factor receptor	1729	7	TRUE	FALSE	FALSE	TRUE	TRUE	FALSE	FALSE	FALSE	FALSE	FALSE	TRUE	FALSE	Cell membrane	2	72	CHEMBL1201577	CETUXIMAB	TRUE	4	FALSE	KEGG	HIF-1 signaling pathway	1	14	2	0	0	14	61.43
EGFR	ENSG00000146648	epidermal growth factor receptor	1729	7	TRUE	FALSE	FALSE	TRUE	TRUE	FALSE	FALSE	FALSE	FALSE	FALSE	TRUE	FALSE	Cell membrane	2	72	CHEMBL1079742	ERLOTINIB HYDROCHLORIDE	TRUE	4	FALSE	KEGG	HIF-1 signaling pathway	1	14	2	0	0	14	61.43
EGFR	ENSG00000146648	epidermal growth factor receptor	1729	7	TRUE	FALSE	FALSE	TRUE	TRUE	FALSE	FALSE	FALSE	FALSE	FALSE	TRUE	FALSE	Cell membrane	2	72	CHEMBL939	GEFITINIB	TRUE	4	FALSE	KEGG	HIF-1 signaling pathway	1	14	2	0	0	14	61.43
EGFR	ENSG00000146648	epidermal growth factor receptor	1729	7	TRUE	FALSE	FALSE	TRUE	TRUE	FALSE	FALSE	FALSE	FALSE	FALSE	TRUE	FALSE	Cell membrane	2	72	CHEMBL1201827	PANITUMUMAB	TRUE	4	FALSE	KEGG	HIF-1 signaling pathway	1	14	2	0	0	14	61.43
EGFR	ENSG00000146648	epidermal growth factor receptor	1729	7	TRUE	FALSE	FALSE	TRUE	TRUE	FALSE	FALSE	FALSE	FALSE	FALSE	TRUE	FALSE	Cell membrane	2	72	CHEMBL553	ERLOTINIB	TRUE	4	FALSE	KEGG	HIF-1 signaling pathway	1	14	2	0	0	14	61.43
EGFR	ENSG00000146648	epidermal growth factor receptor	1729	7	TRUE	FALSE	FALSE	TRUE	TRUE	FALSE	FALSE	FALSE	FALSE	FALSE	TRUE	FALSE	Cell membrane	2	72	CHEMBL2087361	ICOTINIB	FALSE	3	FALSE	KEGG	HIF-1 signaling pathway	1	14	2	0	0	14	61.43
EGFR	ENSG00000146648	epidermal growth factor receptor	1729	7	TRUE	FALSE	FALSE	TRUE	TRUE	FALSE	FALSE	FALSE	FALSE	FALSE	TRUE	FALSE	Cell membrane	2	72	CHEMBL180022	NERATINIB	TRUE	4	FALSE	KEGG	HIF-1 signaling pathway	1	14	2	0	0	14	61.43
MAPK14	ENSG00000112062	mitogen-activated protein kinase 14	462	5	FALSE	TRUE	FALSE	TRUE	FALSE	FALSE	FALSE	FALSE	FALSE	FALSE	FALSE	FALSE	Cytoplasm	0	21	CHEMBL1090090	VX-702	FALSE	2	FALSE	Reactome	Regulation of TP53 Activity	3	0	2	10	0	0	60.12
MAPK14	ENSG00000112062	mitogen-activated protein kinase 14	462	5	FALSE	TRUE	FALSE	TRUE	FALSE	FALSE	FALSE	FALSE	FALSE	FALSE	FALSE	FALSE	Cytoplasm	0	21	CHEMBL1088751	PH-797804	FALSE	2	FALSE	Reactome	Transcriptional Regulation by TP53	3	0	2	10	0	0	60.12
MAPK14	ENSG00000112062	mitogen-activated protein kinase 14	462	5	FALSE	TRUE	FALSE	TRUE	FALSE	FALSE	FALSE	FALSE	FALSE	FALSE	FALSE	FALSE	Cytoplasm	0	21	CHEMBL1088750	ARRY-797	FALSE	3	FALSE	Reactome	Cytokine Signaling in Immune system	3	0	2	10	0	0	60.12
MAPK14	ENSG00000112062	mitogen-activated protein kinase 14	462	5	FALSE	TRUE	FALSE	TRUE	FALSE	FALSE	FALSE	FALSE	FALSE	FALSE	FALSE	FALSE	Cytoplasm	0	21	CHEMBL1088752	LOSMAPIMOD	FALSE	3	FALSE	Reactome	Cytokine Signaling in Immune system	3	0	2	10	0	0	60.12
MAPK14	ENSG00000112062	mitogen-activated protein kinase 14	462	5	FALSE	TRUE	FALSE	TRUE	FALSE	FALSE	FALSE	FALSE	FALSE	FALSE	FALSE	FALSE	Cytoplasm	0	21	CHEMBL1088752	LOSMAPIMOD	FALSE	3	FALSE	Reactome	Cytokine Signaling in Immune system	3	0	2	10	0	0	60.12
MAPK14	ENSG00000112062	mitogen-activated protein kinase 14	462	5	FALSE	TRUE	FALSE	TRUE	FALSE	FALSE	FALSE	FALSE	FALSE	FALSE	FALSE	FALSE	Cytoplasm	0	21	CHEMBL1230065	BMS-582949	FALSE	2	FALSE	Reactome	Regulation of TP53 Activity	3	0	2	10	0	0	60.12
MAPK14	ENSG00000112062	mitogen-activated protein kinase 14	462	5	FALSE	TRUE	FALSE	TRUE	FALSE	FALSE	FALSE	FALSE	FALSE	FALSE	FALSE	FALSE	Cytoplasm	0	21	CHEMBL2103838	DILMAPIMOD	FALSE	2	FALSE	Reactome	Transcriptional Regulation by TP53	3	0	2	10	0	0	60.12
MAPK14	ENSG00000112062	mitogen-activated protein kinase 14	462	5	FALSE	TRUE	FALSE	TRUE	FALSE	FALSE	FALSE	FALSE	FALSE	FALSE	FALSE	FALSE	Cytoplasm	0	21	CHEMBL1088752	LOSMAPIMOD	FALSE	3	FALSE	Reactome	Cytokine Signaling in Immune system	3	0	2	10	0	0	60.12
MAPK14	ENSG00000112062	mitogen-activated protein kinase 14	462	5	FALSE	TRUE	FALSE	TRUE	FALSE	FALSE	FALSE	FALSE	FALSE	FALSE	FALSE	FALSE	Cytoplasm	0	21	CHEMBL119385	NEFLAMAPIMOD	FALSE	2	FALSE	Reactome	Transcriptional Regulation by TP53	3	0	2	10	0	0	60.12
MAPK14	ENSG00000112062	mitogen-activated protein kinase 14	462	5	FALSE	TRUE	FALSE	TRUE	FALSE	FALSE	FALSE	FALSE	FALSE	FALSE	FALSE	FALSE	Cytoplasm	0	21	CHEMBL1088752	LOSMAPIMOD	FALSE	3	FALSE	Reactome	Regulation of TP53 Activity	3	0	2	10	0	0	60.12
MAPK14	ENSG00000112062	mitogen-activated protein kinase 14	462	5	FALSE	TRUE	FALSE	TRUE	FALSE	FALSE	FALSE	FALSE	FALSE	FALSE	FALSE	FALSE	Cytoplasm	0	21	CHEMBL1088752	LOSMAPIMOD	FALSE	3	FALSE	Reactome	Cytokine Signaling in Immune system	3	0	2	10	0	0	60.12
MAPK14	ENSG00000112062	mitogen-activated protein kinase 14	462	5	FALSE	TRUE	FALSE	TRUE	FALSE	FALSE	FALSE	FALSE	FALSE	FALSE	FALSE	FALSE	Cytoplasm	0	21	CHEMBL1088752	LOSMAPIMOD	FALSE	3	FALSE	Reactome	Regulation of TP53 Activity	3	0	2	10	0	0	60.12
MAPK14	ENSG00000112062	mitogen-activated protein kinase 14	462	5	FALSE	TRUE	FALSE	TRUE	FALSE	FALSE	FALSE	FALSE	FALSE	FALSE	FALSE	FALSE	Cytoplasm	0	21	CHEMBL2364626	RALIMETINIB	FALSE	2	FALSE	Reactome	Regulation of TP53 Activity	3	0	2	10	0	0	60.12
MAPK14	ENSG00000112062	mitogen-activated protein kinase 14	462	5	FALSE	TRUE	FALSE	TRUE	FALSE	FALSE	FALSE	FALSE	FALSE	FALSE	FALSE	FALSE	Cytoplasm	0	21	CHEMBL1088752	LOSMAPIMOD	FALSE	3	FALSE	Reactome	Transcriptional Regulation by TP53	3	0	2	10	0	0	60.12
MAPK14	ENSG00000112062	mitogen-activated protein kinase 14	462	5	FALSE	TRUE	FALSE	TRUE	FALSE	FALSE	FALSE	FALSE	FALSE	FALSE	FALSE	FALSE	Cytoplasm	0	21	CHEMBL363648	TAK-715	FALSE	2	FALSE	Reactome	Regulation of TP53 Activity	3	0	2	10	0	0	60.12
MAPK14	ENSG00000112062	mitogen-activated protein kinase 14	462	5	FALSE	TRUE	FALSE	TRUE	FALSE	FALSE	FALSE	FALSE	FALSE	FALSE	FALSE	FALSE	Cytoplasm	0	21	CHEMBL2103838	DILMAPIMOD	FALSE	2	FALSE	Reactome	Cytokine Signaling in Immune system	3	0	2	10	0	0	60.12
MAPK14	ENSG00000112062	mitogen-activated protein kinase 14	462	5	FALSE	TRUE	FALSE	TRUE	FALSE	FALSE	FALSE	FALSE	FALSE	FALSE	FALSE	FALSE	Cytoplasm	0	21	CHEMBL2103838	DILMAPIMOD	FALSE	2	FALSE	Reactome	Transcriptional Regulation by TP53	3	0	2	10	0	0	60.12
MAPK14	ENSG00000112062	mitogen-activated protein kinase 14	462	5	FALSE	TRUE	FALSE	TRUE	FALSE	FALSE	FALSE	FALSE	FALSE	FALSE	FALSE	FALSE	Cytoplasm	0	21	CHEMBL2364626	RALIMETINIB	FALSE	2	FALSE	Reactome	Cytokine Signaling in Immune system	3	0	2	10	0	0	60.12
MAPK14	ENSG00000112062	mitogen-activated protein kinase 14	462	5	FALSE	TRUE	FALSE	TRUE	FALSE	FALSE	FALSE	FALSE	FALSE	FALSE	FALSE	FALSE	Cytoplasm	0	21	CHEMBL1088752	LOSMAPIMOD	FALSE	3	FALSE	Reactome	Transcriptional Regulation by TP53	3	0	2	10	0	0	60.12
MAPK14	ENSG00000112062	mitogen-activated protein kinase 14	462	5	FALSE	TRUE	FALSE	TRUE	FALSE	FALSE	FALSE	FALSE	FALSE	FALSE	FALSE	FALSE	Cytoplasm	0	21	CHEMBL3545398	PG-760564	FALSE	2	FALSE	Reactome	Regulation of TP53 Activity	3	0	2	10	0	0	60.12
MAPK14	ENSG00000112062	mitogen-activated protein kinase 14	462	5	FALSE	TRUE	FALSE	TRUE	FALSE	FALSE	FALSE	FALSE	FALSE	FALSE	FALSE	FALSE	Cytoplasm	0	21	CHEMBL3545398	PG-760564	FALSE	2	FALSE	Reactome	Cytokine Signaling in Immune system	3	0	2	10	0	0	60.12
MAPK14	ENSG00000112062	mitogen-activated protein kinase 14	462	5	FALSE	TRUE	FALSE	TRUE	FALSE	FALSE	FALSE	FALSE	FALSE	FALSE	FALSE	FALSE	Cytoplasm	0	21	CHEMBL1088750	ARRY-797	FALSE	3	FALSE	Reactome	Transcriptional Regulation by TP53	3	0	2	10	0	0	60.12
MAPK14	ENSG00000112062	mitogen-activated protein kinase 14	462	5	FALSE	TRUE	FALSE	TRUE	FALSE	FALSE	FALSE	FALSE	FALSE	FALSE	FALSE	FALSE	Cytoplasm	0	21	CHEMBL2103838	DILMAPIMOD	FALSE	2	FALSE	Reactome	Transcriptional Regulation by TP53	3	0	2	10	0	0	60.12
MAPK14	ENSG00000112062	mitogen-activated protein kinase 14	462	5	FALSE	TRUE	FALSE	TRUE	FALSE	FALSE	FALSE	FALSE	FALSE	FALSE	FALSE	FALSE	Cytoplasm	0	21	CHEMBL1088752	LOSMAPIMOD	FALSE	3	FALSE	Reactome	Transcriptional Regulation by TP53	3	0	2	10	0	0	60.12
MAPK14	ENSG00000112062	mitogen-activated protein kinase 14	462	5	FALSE	TRUE	FALSE	TRUE	FALSE	FALSE	FALSE	FALSE	FALSE	FALSE	FALSE	FALSE	Cytoplasm	0	21	CHEMBL1088751	PH-797804	FALSE	2	FALSE	Reactome	Cytokine Signaling in Immune system	3	0	2	10	0	0	60.12
MAPK14	ENSG00000112062	mitogen-activated protein kinase 14	462	5	FALSE	TRUE	FALSE	TRUE	FALSE	FALSE	FALSE	FALSE	FALSE	FALSE	FALSE	FALSE	Cytoplasm	0	21	CHEMBL1090090	VX-702	FALSE	2	FALSE	Reactome	Cytokine Signaling in Immune system	3	0	2	10	0	0	60.12
MAPK14	ENSG00000112062	mitogen-activated protein kinase 14	462	5	FALSE	TRUE	FALSE	TRUE	FALSE	FALSE	FALSE	FALSE	FALSE	FALSE	FALSE	FALSE	Cytoplasm	0	21	CHEMBL1088752	LOSMAPIMOD	FALSE	3	FALSE	Reactome	Regulation of TP53 Activity	3	0	2	10	0	0	60.12
MAPK14	ENSG00000112062	mitogen-activated protein kinase 14	462	5	FALSE	TRUE	FALSE	TRUE	FALSE	FALSE	FALSE	FALSE	FALSE	FALSE	FALSE	FALSE	Cytoplasm	0	21	CHEMBL1088752	LOSMAPIMOD	FALSE	3	FALSE	Reactome	Cytokine Signaling in Immune system	3	0	2	10	0	0	60.12
MAPK14	ENSG00000112062	mitogen-activated protein kinase 14	462	5	FALSE	TRUE	FALSE	TRUE	FALSE	FALSE	FALSE	FALSE	FALSE	FALSE	FALSE	FALSE	Cytoplasm	0	21	CHEMBL1088752	LOSMAPIMOD	FALSE	3	FALSE	Reactome	Regulation of TP53 Activity	3	0	2	10	0	0	60.12
MAPK14	ENSG00000112062	mitogen-activated protein kinase 14	462	5	FALSE	TRUE	FALSE	TRUE	FALSE	FALSE	FALSE	FALSE	FALSE	FALSE	FALSE	FALSE	Cytoplasm	0	21	CHEMBL9960	AZD-7624	FALSE	2	FALSE	Reactome	Cytokine Signaling in Immune system	3	0	2	10	0	0	60.12
MAPK14	ENSG00000112062	mitogen-activated protein kinase 14	462	5	FALSE	TRUE	FALSE	TRUE	FALSE	FALSE	FALSE	FALSE	FALSE	FALSE	FALSE	FALSE	Cytoplasm	0	21	CHEMBL119385	NEFLAMAPIMOD	FALSE	2	FALSE	Reactome	Transcriptional Regulation by TP53	3	0	2	10	0	0	60.12
MAPK14	ENSG00000112062	mitogen-activated protein kinase 14	462	5	FALSE	TRUE	FALSE	TRUE	FALSE	FALSE	FALSE	FALSE	FALSE	FALSE	FALSE	FALSE	Cytoplasm	0	21	CHEMBL1088750	ARRY-797	FALSE	3	FALSE	Reactome	Regulation of TP53 Activity	3	0	2	10	0	0	60.12
MAPK14	ENSG00000112062	mitogen-activated protein kinase 14	462	5	FALSE	TRUE	FALSE	TRUE	FALSE	FALSE	FALSE	FALSE	FALSE	FALSE	FALSE	FALSE	Cytoplasm	0	21	CHEMBL1088750	ARRY-797	FALSE	3	FALSE	Reactome	Cytokine Signaling in Immune system	3	0	2	10	0	0	60.12
MAPK14	ENSG00000112062	mitogen-activated protein kinase 14	462	5	FALSE	TRUE	FALSE	TRUE	FALSE	FALSE	FALSE	FALSE	FALSE	FALSE	FALSE	FALSE	Cytoplasm	0	21	CHEMBL1088750	ARRY-797	FALSE	3	FALSE	Reactome	Regulation of TP53 Activity	3	0	2	10	0	0	60.12
MAPK14	ENSG00000112062	mitogen-activated protein kinase 14	462	5	FALSE	TRUE	FALSE	TRUE	FALSE	FALSE	FALSE	FALSE	FALSE	FALSE	FALSE	FALSE	Cytoplasm	0	21	CHEMBL1088751	PH-797804	FALSE	2	FALSE	Reactome	Cytokine Signaling in Immune system	3	0	2	10	0	0	60.12
MAPK14	ENSG00000112062	mitogen-activated protein kinase 14	462	5	FALSE	TRUE	FALSE	TRUE	FALSE	FALSE	FALSE	FALSE	FALSE	FALSE	FALSE	FALSE	Cytoplasm	0	21	CHEMBL2103838	DILMAPIMOD	FALSE	2	FALSE	Reactome	Cytokine Signaling in Immune system	3	0	2	10	0	0	60.12
MAPK14	ENSG00000112062	mitogen-activated protein kinase 14	462	5	FALSE	TRUE	FALSE	TRUE	FALSE	FALSE	FALSE	FALSE	FALSE	FALSE	FALSE	FALSE	Cytoplasm	0	21	CHEMBL2103838	DILMAPIMOD	FALSE	2	FALSE	Reactome	Regulation of TP53 Activity	3	0	2	10	0	0	60.12
MAPK14	ENSG00000112062	mitogen-activated protein kinase 14	462	5	FALSE	TRUE	FALSE	TRUE	FALSE	FALSE	FALSE	FALSE	FALSE	FALSE	FALSE	FALSE	Cytoplasm	0	21	CHEMBL2103838	DILMAPIMOD	FALSE	2	FALSE	Reactome	Regulation of TP53 Activity	3	0	2	10	0	0	60.12
MAPK14	ENSG00000112062	mitogen-activated protein kinase 14	462	5	FALSE	TRUE	FALSE	TRUE	FALSE	FALSE	FALSE	FALSE	FALSE	FALSE	FALSE	FALSE	Cytoplasm	0	21	CHEMBL9960	AZD-7624	FALSE	2	FALSE	Reactome	Transcriptional Regulation by TP53	3	0	2	10	0	0	60.12
MAPK14	ENSG00000112062	mitogen-activated protein kinase 14	462	5	FALSE	TRUE	FALSE	TRUE	FALSE	FALSE	FALSE	FALSE	FALSE	FALSE	FALSE	FALSE	Cytoplasm	0	21	CHEMBL9960	AZD-7624	FALSE	2	FALSE	Reactome	Regulation of TP53 Activity	3	0	2	10	0	0	60.12
MAPK14	ENSG00000112062	mitogen-activated protein kinase 14	462	5	FALSE	TRUE	FALSE	TRUE	FALSE	FALSE	FALSE	FALSE	FALSE	FALSE	FALSE	FALSE	Cytoplasm	0	21	CHEMBL1088750	ARRY-797	FALSE	3	FALSE	Reactome	Cytokine Signaling in Immune system	3	0	2	10	0	0	60.12
MAPK14	ENSG00000112062	mitogen-activated protein kinase 14	462	5	FALSE	TRUE	FALSE	TRUE	FALSE	FALSE	FALSE	FALSE	FALSE	FALSE	FALSE	FALSE	Cytoplasm	0	21	CHEMBL1088750	ARRY-797	FALSE	3	FALSE	Reactome	Regulation of TP53 Activity	3	0	2	10	0	0	60.12
MAPK14	ENSG00000112062	mitogen-activated protein kinase 14	462	5	FALSE	TRUE	FALSE	TRUE	FALSE	FALSE	FALSE	FALSE	FALSE	FALSE	FALSE	FALSE	Cytoplasm	0	21	CHEMBL363648	TAK-715	FALSE	2	FALSE	Reactome	Cytokine Signaling in Immune system	3	0	2	10	0	0	60.12
MAPK14	ENSG00000112062	mitogen-activated protein kinase 14	462	5	FALSE	TRUE	FALSE	TRUE	FALSE	FALSE	FALSE	FALSE	FALSE	FALSE	FALSE	FALSE	Cytoplasm	0	21	CHEMBL2103838	DILMAPIMOD	FALSE	2	FALSE	Reactome	Transcriptional Regulation by TP53	3	0	2	10	0	0	60.12
MAPK14	ENSG00000112062	mitogen-activated protein kinase 14	462	5	FALSE	TRUE	FALSE	TRUE	FALSE	FALSE	FALSE	FALSE	FALSE	FALSE	FALSE	FALSE	Cytoplasm	0	21	CHEMBL3545282	KC-706	FALSE	2	FALSE	Reactome	Cytokine Signaling in Immune system	3	0	2	10	0	0	60.12
MAPK14	ENSG00000112062	mitogen-activated protein kinase 14	462	5	FALSE	TRUE	FALSE	TRUE	FALSE	FALSE	FALSE	FALSE	FALSE	FALSE	FALSE	FALSE	Cytoplasm	0	21	CHEMBL2103838	DILMAPIMOD	FALSE	2	FALSE	Reactome	Regulation of TP53 Activity	3	0	2	10	0	0	60.12
MAPK14	ENSG00000112062	mitogen-activated protein kinase 14	462	5	FALSE	TRUE	FALSE	TRUE	FALSE	FALSE	FALSE	FALSE	FALSE	FALSE	FALSE	FALSE	Cytoplasm	0	21	CHEMBL363648	TAK-715	FALSE	2	FALSE	Reactome	Transcriptional Regulation by TP53	3	0	2	10	0	0	60.12
MAPK14	ENSG00000112062	mitogen-activated protein kinase 14	462	5	FALSE	TRUE	FALSE	TRUE	FALSE	FALSE	FALSE	FALSE	FALSE	FALSE	FALSE	FALSE	Cytoplasm	0	21	CHEMBL1088752	LOSMAPIMOD	FALSE	3	FALSE	Reactome	Transcriptional Regulation by TP53	3	0	2	10	0	0	60.12
MAPK14	ENSG00000112062	mitogen-activated protein kinase 14	462	5	FALSE	TRUE	FALSE	TRUE	FALSE	FALSE	FALSE	FALSE	FALSE	FALSE	FALSE	FALSE	Cytoplasm	0	21	CHEMBL3545398	PG-760564	FALSE	2	FALSE	Reactome	Transcriptional Regulation by TP53	3	0	2	10	0	0	60.12
MAPK14	ENSG00000112062	mitogen-activated protein kinase 14	462	5	FALSE	TRUE	FALSE	TRUE	FALSE	FALSE	FALSE	FALSE	FALSE	FALSE	FALSE	FALSE	Cytoplasm	0	21	CHEMBL1088752	LOSMAPIMOD	FALSE	3	FALSE	Reactome	Regulation of TP53 Activity	3	0	2	10	0	0	60.12
MAPK14	ENSG00000112062	mitogen-activated protein kinase 14	462	5	FALSE	TRUE	FALSE	TRUE	FALSE	FALSE	FALSE	FALSE	FALSE	FALSE	FALSE	FALSE	Cytoplasm	0	21	CHEMBL1088752	LOSMAPIMOD	FALSE	3	FALSE	Reactome	Cytokine Signaling in Immune system	3	0	2	10	0	0	60.12
MAPK14	ENSG00000112062	mitogen-activated protein kinase 14	462	5	FALSE	TRUE	FALSE	TRUE	FALSE	FALSE	FALSE	FALSE	FALSE	FALSE	FALSE	FALSE	Cytoplasm	0	21	CHEMBL1230065	BMS-582949	FALSE	2	FALSE	Reactome	Cytokine Signaling in Immune system	3	0	2	10	0	0	60.12
MAPK14	ENSG00000112062	mitogen-activated protein kinase 14	462	5	FALSE	TRUE	FALSE	TRUE	FALSE	FALSE	FALSE	FALSE	FALSE	FALSE	FALSE	FALSE	Cytoplasm	0	21	CHEMBL2364626	RALIMETINIB	FALSE	2	FALSE	Reactome	Transcriptional Regulation by TP53	3	0	2	10	0	0	60.12
MAPK14	ENSG00000112062	mitogen-activated protein kinase 14	462	5	FALSE	TRUE	FALSE	TRUE	FALSE	FALSE	FALSE	FALSE	FALSE	FALSE	FALSE	FALSE	Cytoplasm	0	21	CHEMBL2103838	DILMAPIMOD	FALSE	2	FALSE	Reactome	Cytokine Signaling in Immune system	3	0	2	10	0	0	60.12
MAPK14	ENSG00000112062	mitogen-activated protein kinase 14	462	5	FALSE	TRUE	FALSE	TRUE	FALSE	FALSE	FALSE	FALSE	FALSE	FALSE	FALSE	FALSE	Cytoplasm	0	21	CHEMBL1088752	LOSMAPIMOD	FALSE	3	FALSE	Reactome	Regulation of TP53 Activity	3	0	2	10	0	0	60.12
MAPK14	ENSG00000112062	mitogen-activated protein kinase 14	462	5	FALSE	TRUE	FALSE	TRUE	FALSE	FALSE	FALSE	FALSE	FALSE	FALSE	FALSE	FALSE	Cytoplasm	0	21	CHEMBL2103838	DILMAPIMOD	FALSE	2	FALSE	Reactome	Regulation of TP53 Activity	3	0	2	10	0	0	60.12
MAPK14	ENSG00000112062	mitogen-activated protein kinase 14	462	5	FALSE	TRUE	FALSE	TRUE	FALSE	FALSE	FALSE	FALSE	FALSE	FALSE	FALSE	FALSE	Cytoplasm	0	21	CHEMBL119385	NEFLAMAPIMOD	FALSE	2	FALSE	Reactome	Regulation of TP53 Activity	3	0	2	10	0	0	60.12
MAPK14	ENSG00000112062	mitogen-activated protein kinase 14	462	5	FALSE	TRUE	FALSE	TRUE	FALSE	FALSE	FALSE	FALSE	FALSE	FALSE	FALSE	FALSE	Cytoplasm	0	21	CHEMBL3545282	KC-706	FALSE	2	FALSE	Reactome	Regulation of TP53 Activity	3	0	2	10	0	0	60.12
MAPK14	ENSG00000112062	mitogen-activated protein kinase 14	462	5	FALSE	TRUE	FALSE	TRUE	FALSE	FALSE	FALSE	FALSE	FALSE	FALSE	FALSE	FALSE	Cytoplasm	0	21	CHEMBL1090090	VX-702	FALSE	2	FALSE	Reactome	Transcriptional Regulation by TP53	3	0	2	10	0	0	60.12
MAPK14	ENSG00000112062	mitogen-activated protein kinase 14	462	5	FALSE	TRUE	FALSE	TRUE	FALSE	FALSE	FALSE	FALSE	FALSE	FALSE	FALSE	FALSE	Cytoplasm	0	21	CHEMBL1088751	PH-797804	FALSE	2	FALSE	Reactome	Regulation of TP53 Activity	3	0	2	10	0	0	60.12
MAPK14	ENSG00000112062	mitogen-activated protein kinase 14	462	5	FALSE	TRUE	FALSE	TRUE	FALSE	FALSE	FALSE	FALSE	FALSE	FALSE	FALSE	FALSE	Cytoplasm	0	21	CHEMBL3545282	KC-706	FALSE	2	FALSE	Reactome	Transcriptional Regulation by TP53	3	0	2	10	0	0	60.12
MAPK14	ENSG00000112062	mitogen-activated protein kinase 14	462	5	FALSE	TRUE	FALSE	TRUE	FALSE	FALSE	FALSE	FALSE	FALSE	FALSE	FALSE	FALSE	Cytoplasm	0	21	CHEMBL119385	NEFLAMAPIMOD	FALSE	2	FALSE	Reactome	Cytokine Signaling in Immune system	3	0	2	10	0	0	60.12
MAPK14	ENSG00000112062	mitogen-activated protein kinase 14	462	5	FALSE	TRUE	FALSE	TRUE	FALSE	FALSE	FALSE	FALSE	FALSE	FALSE	FALSE	FALSE	Cytoplasm	0	21	CHEMBL119385	NEFLAMAPIMOD	FALSE	2	FALSE	Reactome	Cytokine Signaling in Immune system	3	0	2	10	0	0	60.12
MAPK14	ENSG00000112062	mitogen-activated protein kinase 14	462	5	FALSE	TRUE	FALSE	TRUE	FALSE	FALSE	FALSE	FALSE	FALSE	FALSE	FALSE	FALSE	Cytoplasm	0	21	CHEMBL2103838	DILMAPIMOD	FALSE	2	FALSE	Reactome	Cytokine Signaling in Immune system	3	0	2	10	0	0	60.12
MAPK14	ENSG00000112062	mitogen-activated protein kinase 14	462	5	FALSE	TRUE	FALSE	TRUE	FALSE	FALSE	FALSE	FALSE	FALSE	FALSE	FALSE	FALSE	Cytoplasm	0	21	CHEMBL1088750	ARRY-797	FALSE	3	FALSE	Reactome	Transcriptional Regulation by TP53	3	0	2	10	0	0	60.12
MAPK14	ENSG00000112062	mitogen-activated protein kinase 14	462	5	FALSE	TRUE	FALSE	TRUE	FALSE	FALSE	FALSE	FALSE	FALSE	FALSE	FALSE	FALSE	Cytoplasm	0	21	CHEMBL1230065	BMS-582949	FALSE	2	FALSE	Reactome	Transcriptional Regulation by TP53	3	0	2	10	0	0	60.12
MAPK14	ENSG00000112062	mitogen-activated protein kinase 14	462	5	FALSE	TRUE	FALSE	TRUE	FALSE	FALSE	FALSE	FALSE	FALSE	FALSE	FALSE	FALSE	Cytoplasm	0	21	CHEMBL1088752	LOSMAPIMOD	FALSE	3	FALSE	Reactome	Transcriptional Regulation by TP53	3	0	2	10	0	0	60.12
MAPK14	ENSG00000112062	mitogen-activated protein kinase 14	462	5	FALSE	TRUE	FALSE	TRUE	FALSE	FALSE	FALSE	FALSE	FALSE	FALSE	FALSE	FALSE	Cytoplasm	0	21	CHEMBL1088752	LOSMAPIMOD	FALSE	3	FALSE	Reactome	Cytokine Signaling in Immune system	3	0	2	10	0	0	60.12
MAPK14	ENSG00000112062	mitogen-activated protein kinase 14	462	5	FALSE	TRUE	FALSE	TRUE	FALSE	FALSE	FALSE	FALSE	FALSE	FALSE	FALSE	FALSE	Cytoplasm	0	21	CHEMBL1088752	LOSMAPIMOD	FALSE	3	FALSE	Reactome	Regulation of TP53 Activity	3	0	2	10	0	0	60.12
MAPK14	ENSG00000112062	mitogen-activated protein kinase 14	462	5	FALSE	TRUE	FALSE	TRUE	FALSE	FALSE	FALSE	FALSE	FALSE	FALSE	FALSE	FALSE	Cytoplasm	0	21	CHEMBL1088752	LOSMAPIMOD	FALSE	3	FALSE	Reactome	Transcriptional Regulation by TP53	3	0	2	10	0	0	60.12
MAPK14	ENSG00000112062	mitogen-activated protein kinase 14	462	5	FALSE	TRUE	FALSE	TRUE	FALSE	FALSE	FALSE	FALSE	FALSE	FALSE	FALSE	FALSE	Cytoplasm	0	21	CHEMBL1088751	PH-797804	FALSE	2	FALSE	Reactome	Regulation of TP53 Activity	3	0	2	10	0	0	60.12
MAPK14	ENSG00000112062	mitogen-activated protein kinase 14	462	5	FALSE	TRUE	FALSE	TRUE	FALSE	FALSE	FALSE	FALSE	FALSE	FALSE	FALSE	FALSE	Cytoplasm	0	21	CHEMBL119385	NEFLAMAPIMOD	FALSE	2	FALSE	Reactome	Regulation of TP53 Activity	3	0	2	10	0	0	60.12
MAPK14	ENSG00000112062	mitogen-activated protein kinase 14	462	5	FALSE	TRUE	FALSE	TRUE	FALSE	FALSE	FALSE	FALSE	FALSE	FALSE	FALSE	FALSE	Cytoplasm	0	21	CHEMBL1088750	ARRY-797	FALSE	3	FALSE	Reactome	Transcriptional Regulation by TP53	3	0	2	10	0	0	60.12
MAPK14	ENSG00000112062	mitogen-activated protein kinase 14	462	5	FALSE	TRUE	FALSE	TRUE	FALSE	FALSE	FALSE	FALSE	FALSE	FALSE	FALSE	FALSE	Cytoplasm	0	21	CHEMBL1088751	PH-797804	FALSE	2	FALSE	Reactome	Transcriptional Regulation by TP53	3	0	2	10	0	0	60.12
MAPK14	ENSG00000112062	mitogen-activated protein kinase 14	462	5	FALSE	TRUE	FALSE	TRUE	FALSE	FALSE	FALSE	FALSE	FALSE	FALSE	FALSE	FALSE	Cytoplasm	0	21	CHEMBL1088752	LOSMAPIMOD	FALSE	3	FALSE	Reactome	Transcriptional Regulation by TP53	3	0	2	10	0	0	60.12
RPS6KB1	ENSG00000108443	ribosomal protein S6 kinase B1	439	5	FALSE	FALSE	TRUE	TRUE	FALSE	FALSE	FALSE	FALSE	FALSE	FALSE	FALSE	FALSE	Synapse	0	5	CHEMBL3545076	LY-2584702	FALSE	1	FALSE	KEGG	HIF-1 signaling pathway	1	0	0	0	5	0	59.89
RPS6KB1	ENSG00000108443	ribosomal protein S6 kinase B1	439	5	FALSE	FALSE	TRUE	TRUE	FALSE	FALSE	FALSE	FALSE	FALSE	FALSE	FALSE	FALSE	Synapse	0	5	CHEMBL3544935	XL-418	FALSE	1	FALSE	KEGG	HIF-1 signaling pathway	1	0	0	0	5	0	59.89
RPS6KB1	ENSG00000108443	ribosomal protein S6 kinase B1	439	5	FALSE	FALSE	TRUE	TRUE	FALSE	FALSE	FALSE	FALSE	FALSE	FALSE	FALSE	FALSE	Synapse	0	5	CHEMBL3545076	LY-2584702	FALSE	1	FALSE	KEGG	HIF-1 signaling pathway	1	0	0	0	5	0	59.89
RPS6KB1	ENSG00000108443	ribosomal protein S6 kinase B1	439	5	FALSE	FALSE	TRUE	TRUE	FALSE	FALSE	FALSE	FALSE	FALSE	FALSE	FALSE	FALSE	Synapse	0	5	CHEMBL4650277	TAS0612	FALSE	1	FALSE	KEGG	HIF-1 signaling pathway	1	0	0	0	5	0	59.89
RPS6KB1	ENSG00000108443	ribosomal protein S6 kinase B1	439	5	FALSE	FALSE	TRUE	TRUE	FALSE	FALSE	FALSE	FALSE	FALSE	FALSE	FALSE	FALSE	Synapse	0	5	CHEMBL3545134	LY-2780301	FALSE	1	FALSE	KEGG	HIF-1 signaling pathway	1	0	0	0	5	0	59.89
RPS6KB1	ENSG00000108443	ribosomal protein S6 kinase B1	439	5	FALSE	FALSE	TRUE	TRUE	FALSE	FALSE	FALSE	FALSE	FALSE	FALSE	FALSE	FALSE	Synapse	0	5	CHEMBL3545076	LY-2584702	FALSE	1	FALSE	KEGG	HIF-1 signaling pathway	1	0	0	0	5	0	59.89
RPS6KB1	ENSG00000108443	ribosomal protein S6 kinase B1	439	5	FALSE	FALSE	TRUE	TRUE	FALSE	FALSE	FALSE	FALSE	FALSE	FALSE	FALSE	FALSE	Synapse	0	5	CHEMBL3545003	MSC-2363318A	FALSE	1	FALSE	KEGG	HIF-1 signaling pathway	1	0	0	0	5	0	59.89
RPS6KB1	ENSG00000108443	ribosomal protein S6 kinase B1	439	5	FALSE	FALSE	TRUE	TRUE	FALSE	FALSE	FALSE	FALSE	FALSE	FALSE	FALSE	FALSE	Synapse	0	5	CHEMBL3545076	LY-2584702	FALSE	1	FALSE	KEGG	HIF-1 signaling pathway	1	0	0	0	5	0	59.89
RPS6KB1	ENSG00000108443	ribosomal protein S6 kinase B1	439	5	FALSE	FALSE	TRUE	TRUE	FALSE	FALSE	FALSE	FALSE	FALSE	FALSE	FALSE	FALSE	Synapse	0	5	CHEMBL3545076	LY-2584702	FALSE	1	FALSE	KEGG	HIF-1 signaling pathway	1	0	0	0	5	0	59.89
RPS6KB1	ENSG00000108443	ribosomal protein S6 kinase B1	439	5	FALSE	FALSE	TRUE	TRUE	FALSE	FALSE	FALSE	FALSE	FALSE	FALSE	FALSE	FALSE	Synapse	0	5	CHEMBL3545134	LY-2780301	FALSE	1	FALSE	KEGG	HIF-1 signaling pathway	1	0	0	0	5	0	59.89
RPS6KB1	ENSG00000108443	ribosomal protein S6 kinase B1	439	5	FALSE	FALSE	TRUE	TRUE	FALSE	FALSE	FALSE	FALSE	FALSE	FALSE	FALSE	FALSE	Synapse	0	5	CHEMBL3545076	LY-2584702	FALSE	1	FALSE	KEGG	HIF-1 signaling pathway	1	0	0	0	5	0	59.89
MTOR	ENSG00000198793	mechanistic target of rapamycin kinase	1493	5	TRUE	FALSE	FALSE	TRUE	FALSE	FALSE	FALSE	FALSE	FALSE	FALSE	FALSE	FALSE	Endoplasmic reticulum membrane	1	25	CHEMBL75880	PERHEXILINE	TRUE	4	TRUE	KEGG	HIF-1 signaling pathway	3	1	2	6	0	1	54.94
MTOR	ENSG00000198793	mechanistic target of rapamycin kinase	1493	5	TRUE	FALSE	FALSE	TRUE	FALSE	FALSE	FALSE	FALSE	FALSE	FALSE	FALSE	FALSE	Endoplasmic reticulum membrane	1	25	CHEMBL2336325	VISTUSERTIB	FALSE	2	FALSE	KEGG	HIF-1 signaling pathway	3	1	2	6	0	1	54.94
MTOR	ENSG00000198793	mechanistic target of rapamycin kinase	1493	5	TRUE	FALSE	FALSE	TRUE	FALSE	FALSE	FALSE	FALSE	FALSE	FALSE	FALSE	FALSE	Endoplasmic reticulum membrane	1	25	CHEMBL2103839	RIDAFOROLIMUS	FALSE	3	FALSE	KEGG	HIF-1 signaling pathway	3	1	2	6	0	1	54.94
MTOR	ENSG00000198793	mechanistic target of rapamycin kinase	1493	5	TRUE	FALSE	FALSE	TRUE	FALSE	FALSE	FALSE	FALSE	FALSE	FALSE	FALSE	FALSE	Endoplasmic reticulum membrane	1	25	CHEMBL592445	GEDATOLISIB	FALSE	2	FALSE	Reactome	Transcriptional Regulation by TP53	3	1	2	6	0	1	54.94
MTOR	ENSG00000198793	mechanistic target of rapamycin kinase	1493	5	TRUE	FALSE	FALSE	TRUE	FALSE	FALSE	FALSE	FALSE	FALSE	FALSE	FALSE	FALSE	Endoplasmic reticulum membrane	1	25	CHEMBL2103839	RIDAFOROLIMUS	FALSE	3	FALSE	Reactome	Regulation of TP53 Activity	3	1	2	6	0	1	54.94
MTOR	ENSG00000198793	mechanistic target of rapamycin kinase	1493	5	TRUE	FALSE	FALSE	TRUE	FALSE	FALSE	FALSE	FALSE	FALSE	FALSE	FALSE	FALSE	Endoplasmic reticulum membrane	1	25	CHEMBL75880	PERHEXILINE	TRUE	4	TRUE	Reactome	Transcriptional Regulation by TP53	3	1	2	6	0	1	54.94
MTOR	ENSG00000198793	mechanistic target of rapamycin kinase	1493	5	TRUE	FALSE	FALSE	TRUE	FALSE	FALSE	FALSE	FALSE	FALSE	FALSE	FALSE	FALSE	Endoplasmic reticulum membrane	1	25	CHEMBL2103839	RIDAFOROLIMUS	FALSE	3	FALSE	Reactome	Regulation of TP53 Activity	3	1	2	6	0	1	54.94
MTOR	ENSG00000198793	mechanistic target of rapamycin kinase	1493	5	TRUE	FALSE	FALSE	TRUE	FALSE	FALSE	FALSE	FALSE	FALSE	FALSE	FALSE	FALSE	Endoplasmic reticulum membrane	1	25	CHEMBL75880	PERHEXILINE	TRUE	4	TRUE	Reactome	Regulation of TP53 Activity	3	1	2	6	0	1	54.94
MTOR	ENSG00000198793	mechanistic target of rapamycin kinase	1493	5	TRUE	FALSE	FALSE	TRUE	FALSE	FALSE	FALSE	FALSE	FALSE	FALSE	FALSE	FALSE	Endoplasmic reticulum membrane	1	25	CHEMBL592445	GEDATOLISIB	FALSE	2	FALSE	KEGG	HIF-1 signaling pathway	3	1	2	6	0	1	54.94
MTOR	ENSG00000198793	mechanistic target of rapamycin kinase	1493	5	TRUE	FALSE	FALSE	TRUE	FALSE	FALSE	FALSE	FALSE	FALSE	FALSE	FALSE	FALSE	Endoplasmic reticulum membrane	1	25	CHEMBL2336325	VISTUSERTIB	FALSE	2	FALSE	Reactome	Regulation of TP53 Activity	3	1	2	6	0	1	54.94
MTOR	ENSG00000198793	mechanistic target of rapamycin kinase	1493	5	TRUE	FALSE	FALSE	TRUE	FALSE	FALSE	FALSE	FALSE	FALSE	FALSE	FALSE	FALSE	Endoplasmic reticulum membrane	1	25	CHEMBL1879463	DACTOLISIB	FALSE	3	FALSE	Reactome	Transcriptional Regulation by TP53	3	1	2	6	0	1	54.94
MTOR	ENSG00000198793	mechanistic target of rapamycin kinase	1493	5	TRUE	FALSE	FALSE	TRUE	FALSE	FALSE	FALSE	FALSE	FALSE	FALSE	FALSE	FALSE	Endoplasmic reticulum membrane	1	25	CHEMBL1879463	DACTOLISIB	FALSE	3	FALSE	KEGG	HIF-1 signaling pathway	3	1	2	6	0	1	54.94
MTOR	ENSG00000198793	mechanistic target of rapamycin kinase	1493	5	TRUE	FALSE	FALSE	TRUE	FALSE	FALSE	FALSE	FALSE	FALSE	FALSE	FALSE	FALSE	Endoplasmic reticulum membrane	1	25	CHEMBL3545366	VOXTALISIB	FALSE	2	FALSE	Reactome	Transcriptional Regulation by TP53	3	1	2	6	0	1	54.94
MTOR	ENSG00000198793	mechanistic target of rapamycin kinase	1493	5	TRUE	FALSE	FALSE	TRUE	FALSE	FALSE	FALSE	FALSE	FALSE	FALSE	FALSE	FALSE	Endoplasmic reticulum membrane	1	25	CHEMBL1879463	DACTOLISIB	FALSE	3	FALSE	KEGG	HIF-1 signaling pathway	3	1	2	6	0	1	54.94
MTOR	ENSG00000198793	mechanistic target of rapamycin kinase	1493	5	TRUE	FALSE	FALSE	TRUE	FALSE	FALSE	FALSE	FALSE	FALSE	FALSE	FALSE	FALSE	Endoplasmic reticulum membrane	1	25	CHEMBL592445	GEDATOLISIB	FALSE	2	FALSE	Reactome	Transcriptional Regulation by TP53	3	1	2	6	0	1	54.94
MTOR	ENSG00000198793	mechanistic target of rapamycin kinase	1493	5	TRUE	FALSE	FALSE	TRUE	FALSE	FALSE	FALSE	FALSE	FALSE	FALSE	FALSE	FALSE	Endoplasmic reticulum membrane	1	25	CHEMBL1879463	DACTOLISIB	FALSE	3	FALSE	Reactome	Transcriptional Regulation by TP53	3	1	2	6	0	1	54.94
MTOR	ENSG00000198793	mechanistic target of rapamycin kinase	1493	5	TRUE	FALSE	FALSE	TRUE	FALSE	FALSE	FALSE	FALSE	FALSE	FALSE	FALSE	FALSE	Endoplasmic reticulum membrane	1	25	CHEMBL3545097	SAPANISERTIB	FALSE	2	FALSE	KEGG	HIF-1 signaling pathway	3	1	2	6	0	1	54.94
MTOR	ENSG00000198793	mechanistic target of rapamycin kinase	1493	5	TRUE	FALSE	FALSE	TRUE	FALSE	FALSE	FALSE	FALSE	FALSE	FALSE	FALSE	FALSE	Endoplasmic reticulum membrane	1	25	CHEMBL3545097	SAPANISERTIB	FALSE	2	FALSE	KEGG	HIF-1 signaling pathway	3	1	2	6	0	1	54.94
MTOR	ENSG00000198793	mechanistic target of rapamycin kinase	1493	5	TRUE	FALSE	FALSE	TRUE	FALSE	FALSE	FALSE	FALSE	FALSE	FALSE	FALSE	FALSE	Endoplasmic reticulum membrane	1	25	CHEMBL2103839	RIDAFOROLIMUS	FALSE	3	FALSE	Reactome	Transcriptional Regulation by TP53	3	1	2	6	0	1	54.94
MTOR	ENSG00000198793	mechanistic target of rapamycin kinase	1493	5	TRUE	FALSE	FALSE	TRUE	FALSE	FALSE	FALSE	FALSE	FALSE	FALSE	FALSE	FALSE	Endoplasmic reticulum membrane	1	25	CHEMBL2326966	SF-1126	FALSE	2	FALSE	KEGG	HIF-1 signaling pathway	3	1	2	6	0	1	54.94
MTOR	ENSG00000198793	mechanistic target of rapamycin kinase	1493	5	TRUE	FALSE	FALSE	TRUE	FALSE	FALSE	FALSE	FALSE	FALSE	FALSE	FALSE	FALSE	Endoplasmic reticulum membrane	1	25	CHEMBL2103839	RIDAFOROLIMUS	FALSE	3	FALSE	KEGG	HIF-1 signaling pathway	3	1	2	6	0	1	54.94
MTOR	ENSG00000198793	mechanistic target of rapamycin kinase	1493	5	TRUE	FALSE	FALSE	TRUE	FALSE	FALSE	FALSE	FALSE	FALSE	FALSE	FALSE	FALSE	Endoplasmic reticulum membrane	1	25	CHEMBL1879463	DACTOLISIB	FALSE	3	FALSE	Reactome	Regulation of TP53 Activity	3	1	2	6	0	1	54.94
MTOR	ENSG00000198793	mechanistic target of rapamycin kinase	1493	5	TRUE	FALSE	FALSE	TRUE	FALSE	FALSE	FALSE	FALSE	FALSE	FALSE	FALSE	FALSE	Endoplasmic reticulum membrane	1	25	CHEMBL1879463	DACTOLISIB	FALSE	3	FALSE	Reactome	Transcriptional Regulation by TP53	3	1	2	6	0	1	54.94
MTOR	ENSG00000198793	mechanistic target of rapamycin kinase	1493	5	TRUE	FALSE	FALSE	TRUE	FALSE	FALSE	FALSE	FALSE	FALSE	FALSE	FALSE	FALSE	Endoplasmic reticulum membrane	1	25	CHEMBL592445	GEDATOLISIB	FALSE	2	FALSE	KEGG	HIF-1 signaling pathway	3	1	2	6	0	1	54.94
MTOR	ENSG00000198793	mechanistic target of rapamycin kinase	1493	5	TRUE	FALSE	FALSE	TRUE	FALSE	FALSE	FALSE	FALSE	FALSE	FALSE	FALSE	FALSE	Endoplasmic reticulum membrane	1	25	CHEMBL2336325	VISTUSERTIB	FALSE	2	FALSE	KEGG	HIF-1 signaling pathway	3	1	2	6	0	1	54.94
MTOR	ENSG00000198793	mechanistic target of rapamycin kinase	1493	5	TRUE	FALSE	FALSE	TRUE	FALSE	FALSE	FALSE	FALSE	FALSE	FALSE	FALSE	FALSE	Endoplasmic reticulum membrane	1	25	CHEMBL3545097	SAPANISERTIB	FALSE	2	FALSE	Reactome	Regulation of TP53 Activity	3	1	2	6	0	1	54.94
MTOR	ENSG00000198793	mechanistic target of rapamycin kinase	1493	5	TRUE	FALSE	FALSE	TRUE	FALSE	FALSE	FALSE	FALSE	FALSE	FALSE	FALSE	FALSE	Endoplasmic reticulum membrane	1	25	CHEMBL2103839	RIDAFOROLIMUS	FALSE	3	FALSE	Reactome	Regulation of TP53 Activity	3	1	2	6	0	1	54.94
MTOR	ENSG00000198793	mechanistic target of rapamycin kinase	1493	5	TRUE	FALSE	FALSE	TRUE	FALSE	FALSE	FALSE	FALSE	FALSE	FALSE	FALSE	FALSE	Endoplasmic reticulum membrane	1	25	CHEMBL3545366	VOXTALISIB	FALSE	2	FALSE	KEGG	HIF-1 signaling pathway	3	1	2	6	0	1	54.94
MTOR	ENSG00000198793	mechanistic target of rapamycin kinase	1493	5	TRUE	FALSE	FALSE	TRUE	FALSE	FALSE	FALSE	FALSE	FALSE	FALSE	FALSE	FALSE	Endoplasmic reticulum membrane	1	25	CHEMBL1922094	APITOLISIB	FALSE	2	FALSE	KEGG	HIF-1 signaling pathway	3	1	2	6	0	1	54.94
MTOR	ENSG00000198793	mechanistic target of rapamycin kinase	1493	5	TRUE	FALSE	FALSE	TRUE	FALSE	FALSE	FALSE	FALSE	FALSE	FALSE	FALSE	FALSE	Endoplasmic reticulum membrane	1	25	CHEMBL2326966	SF-1126	FALSE	2	FALSE	Reactome	Transcriptional Regulation by TP53	3	1	2	6	0	1	54.94
MTOR	ENSG00000198793	mechanistic target of rapamycin kinase	1493	5	TRUE	FALSE	FALSE	TRUE	FALSE	FALSE	FALSE	FALSE	FALSE	FALSE	FALSE	FALSE	Endoplasmic reticulum membrane	1	25	CHEMBL2103839	RIDAFOROLIMUS	FALSE	3	FALSE	Reactome	Transcriptional Regulation by TP53	3	1	2	6	0	1	54.94
MTOR	ENSG00000198793	mechanistic target of rapamycin kinase	1493	5	TRUE	FALSE	FALSE	TRUE	FALSE	FALSE	FALSE	FALSE	FALSE	FALSE	FALSE	FALSE	Endoplasmic reticulum membrane	1	25	CHEMBL75880	PERHEXILINE	TRUE	4	TRUE	Reactome	Regulation of TP53 Activity	3	1	2	6	0	1	54.94
MTOR	ENSG00000198793	mechanistic target of rapamycin kinase	1493	5	TRUE	FALSE	FALSE	TRUE	FALSE	FALSE	FALSE	FALSE	FALSE	FALSE	FALSE	FALSE	Endoplasmic reticulum membrane	1	25	CHEMBL1879463	DACTOLISIB	FALSE	3	FALSE	Reactome	Regulation of TP53 Activity	3	1	2	6	0	1	54.94
MTOR	ENSG00000198793	mechanistic target of rapamycin kinase	1493	5	TRUE	FALSE	FALSE	TRUE	FALSE	FALSE	FALSE	FALSE	FALSE	FALSE	FALSE	FALSE	Endoplasmic reticulum membrane	1	25	CHEMBL592445	GEDATOLISIB	FALSE	2	FALSE	Reactome	Regulation of TP53 Activity	3	1	2	6	0	1	54.94
MTOR	ENSG00000198793	mechanistic target of rapamycin kinase	1493	5	TRUE	FALSE	FALSE	TRUE	FALSE	FALSE	FALSE	FALSE	FALSE	FALSE	FALSE	FALSE	Endoplasmic reticulum membrane	1	25	CHEMBL2336325	VISTUSERTIB	FALSE	2	FALSE	Reactome	Regulation of TP53 Activity	3	1	2	6	0	1	54.94
MTOR	ENSG00000198793	mechanistic target of rapamycin kinase	1493	5	TRUE	FALSE	FALSE	TRUE	FALSE	FALSE	FALSE	FALSE	FALSE	FALSE	FALSE	FALSE	Endoplasmic reticulum membrane	1	25	CHEMBL75880	PERHEXILINE	TRUE	4	TRUE	Reactome	Regulation of TP53 Activity	3	1	2	6	0	1	54.94
MTOR	ENSG00000198793	mechanistic target of rapamycin kinase	1493	5	TRUE	FALSE	FALSE	TRUE	FALSE	FALSE	FALSE	FALSE	FALSE	FALSE	FALSE	FALSE	Endoplasmic reticulum membrane	1	25	CHEMBL75880	PERHEXILINE	TRUE	4	TRUE	Reactome	Regulation of TP53 Activity	3	1	2	6	0	1	54.94
MTOR	ENSG00000198793	mechanistic target of rapamycin kinase	1493	5	TRUE	FALSE	FALSE	TRUE	FALSE	FALSE	FALSE	FALSE	FALSE	FALSE	FALSE	FALSE	Endoplasmic reticulum membrane	1	25	CHEMBL2103839	RIDAFOROLIMUS	FALSE	3	FALSE	Reactome	Regulation of TP53 Activity	3	1	2	6	0	1	54.94
MTOR	ENSG00000198793	mechanistic target of rapamycin kinase	1493	5	TRUE	FALSE	FALSE	TRUE	FALSE	FALSE	FALSE	FALSE	FALSE	FALSE	FALSE	FALSE	Endoplasmic reticulum membrane	1	25	CHEMBL592445	GEDATOLISIB	FALSE	2	FALSE	Reactome	Regulation of TP53 Activity	3	1	2	6	0	1	54.94
MTOR	ENSG00000198793	mechanistic target of rapamycin kinase	1493	5	TRUE	FALSE	FALSE	TRUE	FALSE	FALSE	FALSE	FALSE	FALSE	FALSE	FALSE	FALSE	Endoplasmic reticulum membrane	1	25	CHEMBL2103839	RIDAFOROLIMUS	FALSE	3	FALSE	Reactome	Transcriptional Regulation by TP53	3	1	2	6	0	1	54.94
MTOR	ENSG00000198793	mechanistic target of rapamycin kinase	1493	5	TRUE	FALSE	FALSE	TRUE	FALSE	FALSE	FALSE	FALSE	FALSE	FALSE	FALSE	FALSE	Endoplasmic reticulum membrane	1	25	CHEMBL592445	GEDATOLISIB	FALSE	2	FALSE	Reactome	Transcriptional Regulation by TP53	3	1	2	6	0	1	54.94
MTOR	ENSG00000198793	mechanistic target of rapamycin kinase	1493	5	TRUE	FALSE	FALSE	TRUE	FALSE	FALSE	FALSE	FALSE	FALSE	FALSE	FALSE	FALSE	Endoplasmic reticulum membrane	1	25	CHEMBL2336325	VISTUSERTIB	FALSE	2	FALSE	Reactome	Transcriptional Regulation by TP53	3	1	2	6	0	1	54.94
MTOR	ENSG00000198793	mechanistic target of rapamycin kinase	1493	5	TRUE	FALSE	FALSE	TRUE	FALSE	FALSE	FALSE	FALSE	FALSE	FALSE	FALSE	FALSE	Endoplasmic reticulum membrane	1	25	CHEMBL2103839	RIDAFOROLIMUS	FALSE	3	FALSE	Reactome	Transcriptional Regulation by TP53	3	1	2	6	0	1	54.94
MTOR	ENSG00000198793	mechanistic target of rapamycin kinase	1493	5	TRUE	FALSE	FALSE	TRUE	FALSE	FALSE	FALSE	FALSE	FALSE	FALSE	FALSE	FALSE	Endoplasmic reticulum membrane	1	25	CHEMBL592445	GEDATOLISIB	FALSE	2	FALSE	KEGG	HIF-1 signaling pathway	3	1	2	6	0	1	54.94
MTOR	ENSG00000198793	mechanistic target of rapamycin kinase	1493	5	TRUE	FALSE	FALSE	TRUE	FALSE	FALSE	FALSE	FALSE	FALSE	FALSE	FALSE	FALSE	Endoplasmic reticulum membrane	1	25	CHEMBL2336325	VISTUSERTIB	FALSE	2	FALSE	KEGG	HIF-1 signaling pathway	3	1	2	6	0	1	54.94
MTOR	ENSG00000198793	mechanistic target of rapamycin kinase	1493	5	TRUE	FALSE	FALSE	TRUE	FALSE	FALSE	FALSE	FALSE	FALSE	FALSE	FALSE	FALSE	Endoplasmic reticulum membrane	1	25	CHEMBL3545097	SAPANISERTIB	FALSE	2	FALSE	Reactome	Transcriptional Regulation by TP53	3	1	2	6	0	1	54.94
MTOR	ENSG00000198793	mechanistic target of rapamycin kinase	1493	5	TRUE	FALSE	FALSE	TRUE	FALSE	FALSE	FALSE	FALSE	FALSE	FALSE	FALSE	FALSE	Endoplasmic reticulum membrane	1	25	CHEMBL75880	PERHEXILINE	TRUE	4	TRUE	Reactome	Transcriptional Regulation by TP53	3	1	2	6	0	1	54.94
MTOR	ENSG00000198793	mechanistic target of rapamycin kinase	1493	5	TRUE	FALSE	FALSE	TRUE	FALSE	FALSE	FALSE	FALSE	FALSE	FALSE	FALSE	FALSE	Endoplasmic reticulum membrane	1	25	CHEMBL2336325	VISTUSERTIB	FALSE	2	FALSE	Reactome	Regulation of TP53 Activity	3	1	2	6	0	1	54.94
MTOR	ENSG00000198793	mechanistic target of rapamycin kinase	1493	5	TRUE	FALSE	FALSE	TRUE	FALSE	FALSE	FALSE	FALSE	FALSE	FALSE	FALSE	FALSE	Endoplasmic reticulum membrane	1	25	CHEMBL2103839	RIDAFOROLIMUS	FALSE	3	FALSE	Reactome	Transcriptional Regulation by TP53	3	1	2	6	0	1	54.94
MTOR	ENSG00000198793	mechanistic target of rapamycin kinase	1493	5	TRUE	FALSE	FALSE	TRUE	FALSE	FALSE	FALSE	FALSE	FALSE	FALSE	FALSE	FALSE	Endoplasmic reticulum membrane	1	25	CHEMBL592445	GEDATOLISIB	FALSE	2	FALSE	Reactome	Regulation of TP53 Activity	3	1	2	6	0	1	54.94
MTOR	ENSG00000198793	mechanistic target of rapamycin kinase	1493	5	TRUE	FALSE	FALSE	TRUE	FALSE	FALSE	FALSE	FALSE	FALSE	FALSE	FALSE	FALSE	Endoplasmic reticulum membrane	1	25	CHEMBL3545366	VOXTALISIB	FALSE	2	FALSE	Reactome	Regulation of TP53 Activity	3	1	2	6	0	1	54.94
MTOR	ENSG00000198793	mechanistic target of rapamycin kinase	1493	5	TRUE	FALSE	FALSE	TRUE	FALSE	FALSE	FALSE	FALSE	FALSE	FALSE	FALSE	FALSE	Endoplasmic reticulum membrane	1	25	CHEMBL1922094	APITOLISIB	FALSE	2	FALSE	Reactome	Regulation of TP53 Activity	3	1	2	6	0	1	54.94
MTOR	ENSG00000198793	mechanistic target of rapamycin kinase	1493	5	TRUE	FALSE	FALSE	TRUE	FALSE	FALSE	FALSE	FALSE	FALSE	FALSE	FALSE	FALSE	Endoplasmic reticulum membrane	1	25	CHEMBL2336325	VISTUSERTIB	FALSE	2	FALSE	Reactome	Regulation of TP53 Activity	3	1	2	6	0	1	54.94
MTOR	ENSG00000198793	mechanistic target of rapamycin kinase	1493	5	TRUE	FALSE	FALSE	TRUE	FALSE	FALSE	FALSE	FALSE	FALSE	FALSE	FALSE	FALSE	Endoplasmic reticulum membrane	1	25	CHEMBL1922094	APITOLISIB	FALSE	2	FALSE	Reactome	Transcriptional Regulation by TP53	3	1	2	6	0	1	54.94
MTOR	ENSG00000198793	mechanistic target of rapamycin kinase	1493	5	TRUE	FALSE	FALSE	TRUE	FALSE	FALSE	FALSE	FALSE	FALSE	FALSE	FALSE	FALSE	Endoplasmic reticulum membrane	1	25	CHEMBL75880	PERHEXILINE	TRUE	4	TRUE	Reactome	Transcriptional Regulation by TP53	3	1	2	6	0	1	54.94
MTOR	ENSG00000198793	mechanistic target of rapamycin kinase	1493	5	TRUE	FALSE	FALSE	TRUE	FALSE	FALSE	FALSE	FALSE	FALSE	FALSE	FALSE	FALSE	Endoplasmic reticulum membrane	1	25	CHEMBL2103839	RIDAFOROLIMUS	FALSE	3	FALSE	KEGG	HIF-1 signaling pathway	3	1	2	6	0	1	54.94
MTOR	ENSG00000198793	mechanistic target of rapamycin kinase	1493	5	TRUE	FALSE	FALSE	TRUE	FALSE	FALSE	FALSE	FALSE	FALSE	FALSE	FALSE	FALSE	Endoplasmic reticulum membrane	1	25	CHEMBL1879463	DACTOLISIB	FALSE	3	FALSE	Reactome	Regulation of TP53 Activity	3	1	2	6	0	1	54.94
MTOR	ENSG00000198793	mechanistic target of rapamycin kinase	1493	5	TRUE	FALSE	FALSE	TRUE	FALSE	FALSE	FALSE	FALSE	FALSE	FALSE	FALSE	FALSE	Endoplasmic reticulum membrane	1	25	CHEMBL592445	GEDATOLISIB	FALSE	2	FALSE	Reactome	Regulation of TP53 Activity	3	1	2	6	0	1	54.94
MTOR	ENSG00000198793	mechanistic target of rapamycin kinase	1493	5	TRUE	FALSE	FALSE	TRUE	FALSE	FALSE	FALSE	FALSE	FALSE	FALSE	FALSE	FALSE	Endoplasmic reticulum membrane	1	25	CHEMBL75880	PERHEXILINE	TRUE	4	TRUE	KEGG	HIF-1 signaling pathway	3	1	2	6	0	1	54.94
MTOR	ENSG00000198793	mechanistic target of rapamycin kinase	1493	5	TRUE	FALSE	FALSE	TRUE	FALSE	FALSE	FALSE	FALSE	FALSE	FALSE	FALSE	FALSE	Endoplasmic reticulum membrane	1	25	CHEMBL2103839	RIDAFOROLIMUS	FALSE	3	FALSE	KEGG	HIF-1 signaling pathway	3	1	2	6	0	1	54.94
MTOR	ENSG00000198793	mechanistic target of rapamycin kinase	1493	5	TRUE	FALSE	FALSE	TRUE	FALSE	FALSE	FALSE	FALSE	FALSE	FALSE	FALSE	FALSE	Endoplasmic reticulum membrane	1	25	CHEMBL2336325	VISTUSERTIB	FALSE	2	FALSE	Reactome	Transcriptional Regulation by TP53	3	1	2	6	0	1	54.94
MTOR	ENSG00000198793	mechanistic target of rapamycin kinase	1493	5	TRUE	FALSE	FALSE	TRUE	FALSE	FALSE	FALSE	FALSE	FALSE	FALSE	FALSE	FALSE	Endoplasmic reticulum membrane	1	25	CHEMBL2103839	RIDAFOROLIMUS	FALSE	3	FALSE	KEGG	HIF-1 signaling pathway	3	1	2	6	0	1	54.94
MTOR	ENSG00000198793	mechanistic target of rapamycin kinase	1493	5	TRUE	FALSE	FALSE	TRUE	FALSE	FALSE	FALSE	FALSE	FALSE	FALSE	FALSE	FALSE	Endoplasmic reticulum membrane	1	25	CHEMBL75880	PERHEXILINE	TRUE	4	TRUE	KEGG	HIF-1 signaling pathway	3	1	2	6	0	1	54.94
MTOR	ENSG00000198793	mechanistic target of rapamycin kinase	1493	5	TRUE	FALSE	FALSE	TRUE	FALSE	FALSE	FALSE	FALSE	FALSE	FALSE	FALSE	FALSE	Endoplasmic reticulum membrane	1	25	CHEMBL592445	GEDATOLISIB	FALSE	2	FALSE	KEGG	HIF-1 signaling pathway	3	1	2	6	0	1	54.94
MTOR	ENSG00000198793	mechanistic target of rapamycin kinase	1493	5	TRUE	FALSE	FALSE	TRUE	FALSE	FALSE	FALSE	FALSE	FALSE	FALSE	FALSE	FALSE	Endoplasmic reticulum membrane	1	25	CHEMBL2336325	VISTUSERTIB	FALSE	2	FALSE	Reactome	Transcriptional Regulation by TP53	3	1	2	6	0	1	54.94
MTOR	ENSG00000198793	mechanistic target of rapamycin kinase	1493	5	TRUE	FALSE	FALSE	TRUE	FALSE	FALSE	FALSE	FALSE	FALSE	FALSE	FALSE	FALSE	Endoplasmic reticulum membrane	1	25	CHEMBL2336325	VISTUSERTIB	FALSE	2	FALSE	KEGG	HIF-1 signaling pathway	3	1	2	6	0	1	54.94
MTOR	ENSG00000198793	mechanistic target of rapamycin kinase	1493	5	TRUE	FALSE	FALSE	TRUE	FALSE	FALSE	FALSE	FALSE	FALSE	FALSE	FALSE	FALSE	Endoplasmic reticulum membrane	1	25	CHEMBL3545097	SAPANISERTIB	FALSE	2	FALSE	Reactome	Transcriptional Regulation by TP53	3	1	2	6	0	1	54.94
MTOR	ENSG00000198793	mechanistic target of rapamycin kinase	1493	5	TRUE	FALSE	FALSE	TRUE	FALSE	FALSE	FALSE	FALSE	FALSE	FALSE	FALSE	FALSE	Endoplasmic reticulum membrane	1	25	CHEMBL75880	PERHEXILINE	TRUE	4	TRUE	Reactome	Transcriptional Regulation by TP53	3	1	2	6	0	1	54.94
MTOR	ENSG00000198793	mechanistic target of rapamycin kinase	1493	5	TRUE	FALSE	FALSE	TRUE	FALSE	FALSE	FALSE	FALSE	FALSE	FALSE	FALSE	FALSE	Endoplasmic reticulum membrane	1	25	CHEMBL2103839	RIDAFOROLIMUS	FALSE	3	FALSE	Reactome	Regulation of TP53 Activity	3	1	2	6	0	1	54.94
MTOR	ENSG00000198793	mechanistic target of rapamycin kinase	1493	5	TRUE	FALSE	FALSE	TRUE	FALSE	FALSE	FALSE	FALSE	FALSE	FALSE	FALSE	FALSE	Endoplasmic reticulum membrane	1	25	CHEMBL75880	PERHEXILINE	TRUE	4	TRUE	KEGG	HIF-1 signaling pathway	3	1	2	6	0	1	54.94
MTOR	ENSG00000198793	mechanistic target of rapamycin kinase	1493	5	TRUE	FALSE	FALSE	TRUE	FALSE	FALSE	FALSE	FALSE	FALSE	FALSE	FALSE	FALSE	Endoplasmic reticulum membrane	1	25	CHEMBL2336325	VISTUSERTIB	FALSE	2	FALSE	Reactome	Transcriptional Regulation by TP53	3	1	2	6	0	1	54.94
MTOR	ENSG00000198793	mechanistic target of rapamycin kinase	1493	5	TRUE	FALSE	FALSE	TRUE	FALSE	FALSE	FALSE	FALSE	FALSE	FALSE	FALSE	FALSE	Endoplasmic reticulum membrane	1	25	CHEMBL2326966	SF-1126	FALSE	2	FALSE	Reactome	Regulation of TP53 Activity	3	1	2	6	0	1	54.94
MTOR	ENSG00000198793	mechanistic target of rapamycin kinase	1493	5	TRUE	FALSE	FALSE	TRUE	FALSE	FALSE	FALSE	FALSE	FALSE	FALSE	FALSE	FALSE	Endoplasmic reticulum membrane	1	25	CHEMBL1879463	DACTOLISIB	FALSE	3	FALSE	KEGG	HIF-1 signaling pathway	3	1	2	6	0	1	54.94
MTOR	ENSG00000198793	mechanistic target of rapamycin kinase	1493	5	TRUE	FALSE	FALSE	TRUE	FALSE	FALSE	FALSE	FALSE	FALSE	FALSE	FALSE	FALSE	Endoplasmic reticulum membrane	1	25	CHEMBL3545097	SAPANISERTIB	FALSE	2	FALSE	Reactome	Regulation of TP53 Activity	3	1	2	6	0	1	54.94
MTOR	ENSG00000198793	mechanistic target of rapamycin kinase	1493	5	TRUE	FALSE	FALSE	TRUE	FALSE	FALSE	FALSE	FALSE	FALSE	FALSE	FALSE	FALSE	Endoplasmic reticulum membrane	1	25	CHEMBL592445	GEDATOLISIB	FALSE	2	FALSE	Reactome	Transcriptional Regulation by TP53	3	1	2	6	0	1	54.94
PIK3R1	ENSG00000145675	phosphoinositide-3-kinase regulatory subunit 1	553	5	FALSE	TRUE	FALSE	TRUE	FALSE	FALSE	FALSE	FALSE	FALSE	FALSE	FALSE	FALSE	Cytosol	0	24	CHEMBL1879463	DACTOLISIB	FALSE	3	FALSE	KEGG	HIF-1 signaling pathway	2	0	3	8	0	0	54.53
PIK3R1	ENSG00000145675	phosphoinositide-3-kinase regulatory subunit 1	553	5	FALSE	TRUE	FALSE	TRUE	FALSE	FALSE	FALSE	FALSE	FALSE	FALSE	FALSE	FALSE	Cytosol	0	24	CHEMBL1922094	APITOLISIB	FALSE	2	FALSE	KEGG	HIF-1 signaling pathway	2	0	3	8	0	0	54.53
PIK3R1	ENSG00000145675	phosphoinositide-3-kinase regulatory subunit 1	553	5	FALSE	TRUE	FALSE	TRUE	FALSE	FALSE	FALSE	FALSE	FALSE	FALSE	FALSE	FALSE	Cytosol	0	24	CHEMBL2017974	BUPARLISIB	FALSE	3	FALSE	KEGG	HIF-1 signaling pathway	2	0	3	8	0	0	54.53
PIK3R1	ENSG00000145675	phosphoinositide-3-kinase regulatory subunit 1	553	5	FALSE	TRUE	FALSE	TRUE	FALSE	FALSE	FALSE	FALSE	FALSE	FALSE	FALSE	FALSE	Cytosol	0	24	CHEMBL2387080	TASELISIB	FALSE	3	FALSE	Reactome	Cytokine Signaling in Immune system	2	0	3	8	0	0	54.53
PIK3R1	ENSG00000145675	phosphoinositide-3-kinase regulatory subunit 1	553	5	FALSE	TRUE	FALSE	TRUE	FALSE	FALSE	FALSE	FALSE	FALSE	FALSE	FALSE	FALSE	Cytosol	0	24	CHEMBL3545366	VOXTALISIB	FALSE	2	FALSE	KEGG	HIF-1 signaling pathway	2	0	3	8	0	0	54.53
PIK3R1	ENSG00000145675	phosphoinositide-3-kinase regulatory subunit 1	553	5	FALSE	TRUE	FALSE	TRUE	FALSE	FALSE	FALSE	FALSE	FALSE	FALSE	FALSE	FALSE	Cytosol	0	24	CHEMBL2017974	BUPARLISIB	FALSE	3	FALSE	Reactome	Cytokine Signaling in Immune system	2	0	3	8	0	0	54.53
PIK3R1	ENSG00000145675	phosphoinositide-3-kinase regulatory subunit 1	553	5	FALSE	TRUE	FALSE	TRUE	FALSE	FALSE	FALSE	FALSE	FALSE	FALSE	FALSE	FALSE	Cytosol	0	24	CHEMBL521851	PICTILISIB	FALSE	2	FALSE	Reactome	Cytokine Signaling in Immune system	2	0	3	8	0	0	54.53
PIK3R1	ENSG00000145675	phosphoinositide-3-kinase regulatory subunit 1	553	5	FALSE	TRUE	FALSE	TRUE	FALSE	FALSE	FALSE	FALSE	FALSE	FALSE	FALSE	FALSE	Cytosol	0	24	CHEMBL2017974	BUPARLISIB	FALSE	3	FALSE	Reactome	Cytokine Signaling in Immune system	2	0	3	8	0	0	54.53
PIK3R1	ENSG00000145675	phosphoinositide-3-kinase regulatory subunit 1	553	5	FALSE	TRUE	FALSE	TRUE	FALSE	FALSE	FALSE	FALSE	FALSE	FALSE	FALSE	FALSE	Cytosol	0	24	CHEMBL2387080	TASELISIB	FALSE	3	FALSE	Reactome	Cytokine Signaling in Immune system	2	0	3	8	0	0	54.53
PIK3R1	ENSG00000145675	phosphoinositide-3-kinase regulatory subunit 1	553	5	FALSE	TRUE	FALSE	TRUE	FALSE	FALSE	FALSE	FALSE	FALSE	FALSE	FALSE	FALSE	Cytosol	0	24	CHEMBL2017974	BUPARLISIB	FALSE	3	FALSE	KEGG	HIF-1 signaling pathway	2	0	3	8	0	0	54.53
PIK3R1	ENSG00000145675	phosphoinositide-3-kinase regulatory subunit 1	553	5	FALSE	TRUE	FALSE	TRUE	FALSE	FALSE	FALSE	FALSE	FALSE	FALSE	FALSE	FALSE	Cytosol	0	24	CHEMBL592445	GEDATOLISIB	FALSE	2	FALSE	KEGG	HIF-1 signaling pathway	2	0	3	8	0	0	54.53
PIK3R1	ENSG00000145675	phosphoinositide-3-kinase regulatory subunit 1	553	5	FALSE	TRUE	FALSE	TRUE	FALSE	FALSE	FALSE	FALSE	FALSE	FALSE	FALSE	FALSE	Cytosol	0	24	CHEMBL2017974	BUPARLISIB	FALSE	3	FALSE	Reactome	Cytokine Signaling in Immune system	2	0	3	8	0	0	54.53
PIK3R1	ENSG00000145675	phosphoinositide-3-kinase regulatory subunit 1	553	5	FALSE	TRUE	FALSE	TRUE	FALSE	FALSE	FALSE	FALSE	FALSE	FALSE	FALSE	FALSE	Cytosol	0	24	CHEMBL1879463	DACTOLISIB	FALSE	3	FALSE	Reactome	Cytokine Signaling in Immune system	2	0	3	8	0	0	54.53
PIK3R1	ENSG00000145675	phosphoinositide-3-kinase regulatory subunit 1	553	5	FALSE	TRUE	FALSE	TRUE	FALSE	FALSE	FALSE	FALSE	FALSE	FALSE	FALSE	FALSE	Cytosol	0	24	CHEMBL1879463	DACTOLISIB	FALSE	3	FALSE	KEGG	HIF-1 signaling pathway	2	0	3	8	0	0	54.53
PIK3R1	ENSG00000145675	phosphoinositide-3-kinase regulatory subunit 1	553	5	FALSE	TRUE	FALSE	TRUE	FALSE	FALSE	FALSE	FALSE	FALSE	FALSE	FALSE	FALSE	Cytosol	0	24	CHEMBL592445	GEDATOLISIB	FALSE	2	FALSE	Reactome	Cytokine Signaling in Immune system	2	0	3	8	0	0	54.53
PIK3R1	ENSG00000145675	phosphoinositide-3-kinase regulatory subunit 1	553	5	FALSE	TRUE	FALSE	TRUE	FALSE	FALSE	FALSE	FALSE	FALSE	FALSE	FALSE	FALSE	Cytosol	0	24	CHEMBL1234354	PF-04691502	FALSE	2	FALSE	KEGG	HIF-1 signaling pathway	2	0	3	8	0	0	54.53
PIK3R1	ENSG00000145675	phosphoinositide-3-kinase regulatory subunit 1	553	5	FALSE	TRUE	FALSE	TRUE	FALSE	FALSE	FALSE	FALSE	FALSE	FALSE	FALSE	FALSE	Cytosol	0	24	CHEMBL2017974	BUPARLISIB	FALSE	3	FALSE	Reactome	Cytokine Signaling in Immune system	2	0	3	8	0	0	54.53
PIK3R1	ENSG00000145675	phosphoinositide-3-kinase regulatory subunit 1	553	5	FALSE	TRUE	FALSE	TRUE	FALSE	FALSE	FALSE	FALSE	FALSE	FALSE	FALSE	FALSE	Cytosol	0	24	CHEMBL2017974	BUPARLISIB	FALSE	3	FALSE	Reactome	Cytokine Signaling in Immune system	2	0	3	8	0	0	54.53
PIK3R1	ENSG00000145675	phosphoinositide-3-kinase regulatory subunit 1	553	5	FALSE	TRUE	FALSE	TRUE	FALSE	FALSE	FALSE	FALSE	FALSE	FALSE	FALSE	FALSE	Cytosol	0	24	CHEMBL1879463	DACTOLISIB	FALSE	3	FALSE	Reactome	Cytokine Signaling in Immune system	2	0	3	8	0	0	54.53
PIK3R1	ENSG00000145675	phosphoinositide-3-kinase regulatory subunit 1	553	5	FALSE	TRUE	FALSE	TRUE	FALSE	FALSE	FALSE	FALSE	FALSE	FALSE	FALSE	FALSE	Cytosol	0	24	CHEMBL592445	GEDATOLISIB	FALSE	2	FALSE	Reactome	Cytokine Signaling in Immune system	2	0	3	8	0	0	54.53
PIK3R1	ENSG00000145675	phosphoinositide-3-kinase regulatory subunit 1	553	5	FALSE	TRUE	FALSE	TRUE	FALSE	FALSE	FALSE	FALSE	FALSE	FALSE	FALSE	FALSE	Cytosol	0	24	CHEMBL3813842	PAXALISIB	FALSE	2	FALSE	Reactome	Cytokine Signaling in Immune system	2	0	3	8	0	0	54.53
PIK3R1	ENSG00000145675	phosphoinositide-3-kinase regulatory subunit 1	553	5	FALSE	TRUE	FALSE	TRUE	FALSE	FALSE	FALSE	FALSE	FALSE	FALSE	FALSE	FALSE	Cytosol	0	24	CHEMBL4297181	SAMOTOLISIB	FALSE	2	FALSE	KEGG	HIF-1 signaling pathway	2	0	3	8	0	0	54.53
PIK3R1	ENSG00000145675	phosphoinositide-3-kinase regulatory subunit 1	553	5	FALSE	TRUE	FALSE	TRUE	FALSE	FALSE	FALSE	FALSE	FALSE	FALSE	FALSE	FALSE	Cytosol	0	24	CHEMBL2387080	TASELISIB	FALSE	3	FALSE	KEGG	HIF-1 signaling pathway	2	0	3	8	0	0	54.53
PIK3R1	ENSG00000145675	phosphoinositide-3-kinase regulatory subunit 1	553	5	FALSE	TRUE	FALSE	TRUE	FALSE	FALSE	FALSE	FALSE	FALSE	FALSE	FALSE	FALSE	Cytosol	0	24	CHEMBL592445	GEDATOLISIB	FALSE	2	FALSE	KEGG	HIF-1 signaling pathway	2	0	3	8	0	0	54.53
PIK3R1	ENSG00000145675	phosphoinositide-3-kinase regulatory subunit 1	553	5	FALSE	TRUE	FALSE	TRUE	FALSE	FALSE	FALSE	FALSE	FALSE	FALSE	FALSE	FALSE	Cytosol	0	24	CHEMBL4297181	SAMOTOLISIB	FALSE	2	FALSE	Reactome	Cytokine Signaling in Immune system	2	0	3	8	0	0	54.53
PIK3R1	ENSG00000145675	phosphoinositide-3-kinase regulatory subunit 1	553	5	FALSE	TRUE	FALSE	TRUE	FALSE	FALSE	FALSE	FALSE	FALSE	FALSE	FALSE	FALSE	Cytosol	0	24	CHEMBL3813842	PAXALISIB	FALSE	2	FALSE	Reactome	Cytokine Signaling in Immune system	2	0	3	8	0	0	54.53
PIK3R1	ENSG00000145675	phosphoinositide-3-kinase regulatory subunit 1	553	5	FALSE	TRUE	FALSE	TRUE	FALSE	FALSE	FALSE	FALSE	FALSE	FALSE	FALSE	FALSE	Cytosol	0	24	CHEMBL3813842	PAXALISIB	FALSE	2	FALSE	Reactome	Cytokine Signaling in Immune system	2	0	3	8	0	0	54.53
PIK3R1	ENSG00000145675	phosphoinositide-3-kinase regulatory subunit 1	553	5	FALSE	TRUE	FALSE	TRUE	FALSE	FALSE	FALSE	FALSE	FALSE	FALSE	FALSE	FALSE	Cytosol	0	24	CHEMBL2017974	BUPARLISIB	FALSE	3	FALSE	KEGG	HIF-1 signaling pathway	2	0	3	8	0	0	54.53
PIK3R1	ENSG00000145675	phosphoinositide-3-kinase regulatory subunit 1	553	5	FALSE	TRUE	FALSE	TRUE	FALSE	FALSE	FALSE	FALSE	FALSE	FALSE	FALSE	FALSE	Cytosol	0	24	CHEMBL2326966	SF-1126	FALSE	2	FALSE	Reactome	Cytokine Signaling in Immune system	2	0	3	8	0	0	54.53
PIK3R1	ENSG00000145675	phosphoinositide-3-kinase regulatory subunit 1	553	5	FALSE	TRUE	FALSE	TRUE	FALSE	FALSE	FALSE	FALSE	FALSE	FALSE	FALSE	FALSE	Cytosol	0	24	CHEMBL2387080	TASELISIB	FALSE	3	FALSE	KEGG	HIF-1 signaling pathway	2	0	3	8	0	0	54.53
PIK3R1	ENSG00000145675	phosphoinositide-3-kinase regulatory subunit 1	553	5	FALSE	TRUE	FALSE	TRUE	FALSE	FALSE	FALSE	FALSE	FALSE	FALSE	FALSE	FALSE	Cytosol	0	24	CHEMBL3813842	PAXALISIB	FALSE	2	FALSE	KEGG	HIF-1 signaling pathway	2	0	3	8	0	0	54.53
PIK3R1	ENSG00000145675	phosphoinositide-3-kinase regulatory subunit 1	553	5	FALSE	TRUE	FALSE	TRUE	FALSE	FALSE	FALSE	FALSE	FALSE	FALSE	FALSE	FALSE	Cytosol	0	24	CHEMBL2387080	TASELISIB	FALSE	3	FALSE	KEGG	HIF-1 signaling pathway	2	0	3	8	0	0	54.53
PIK3R1	ENSG00000145675	phosphoinositide-3-kinase regulatory subunit 1	553	5	FALSE	TRUE	FALSE	TRUE	FALSE	FALSE	FALSE	FALSE	FALSE	FALSE	FALSE	FALSE	Cytosol	0	24	CHEMBL2017974	BUPARLISIB	FALSE	3	FALSE	KEGG	HIF-1 signaling pathway	2	0	3	8	0	0	54.53
PIK3R1	ENSG00000145675	phosphoinositide-3-kinase regulatory subunit 1	553	5	FALSE	TRUE	FALSE	TRUE	FALSE	FALSE	FALSE	FALSE	FALSE	FALSE	FALSE	FALSE	Cytosol	0	24	CHEMBL4297181	SAMOTOLISIB	FALSE	2	FALSE	Reactome	Cytokine Signaling in Immune system	2	0	3	8	0	0	54.53
PIK3R1	ENSG00000145675	phosphoinositide-3-kinase regulatory subunit 1	553	5	FALSE	TRUE	FALSE	TRUE	FALSE	FALSE	FALSE	FALSE	FALSE	FALSE	FALSE	FALSE	Cytosol	0	24	CHEMBL3813842	PAXALISIB	FALSE	2	FALSE	KEGG	HIF-1 signaling pathway	2	0	3	8	0	0	54.53
PIK3R1	ENSG00000145675	phosphoinositide-3-kinase regulatory subunit 1	553	5	FALSE	TRUE	FALSE	TRUE	FALSE	FALSE	FALSE	FALSE	FALSE	FALSE	FALSE	FALSE	Cytosol	0	24	CHEMBL4297181	SAMOTOLISIB	FALSE	2	FALSE	KEGG	HIF-1 signaling pathway	2	0	3	8	0	0	54.53
PIK3R1	ENSG00000145675	phosphoinositide-3-kinase regulatory subunit 1	553	5	FALSE	TRUE	FALSE	TRUE	FALSE	FALSE	FALSE	FALSE	FALSE	FALSE	FALSE	FALSE	Cytosol	0	24	CHEMBL1879463	DACTOLISIB	FALSE	3	FALSE	KEGG	HIF-1 signaling pathway	2	0	3	8	0	0	54.53
PIK3R1	ENSG00000145675	phosphoinositide-3-kinase regulatory subunit 1	553	5	FALSE	TRUE	FALSE	TRUE	FALSE	FALSE	FALSE	FALSE	FALSE	FALSE	FALSE	FALSE	Cytosol	0	24	CHEMBL2017974	BUPARLISIB	FALSE	3	FALSE	KEGG	HIF-1 signaling pathway	2	0	3	8	0	0	54.53
PIK3R1	ENSG00000145675	phosphoinositide-3-kinase regulatory subunit 1	553	5	FALSE	TRUE	FALSE	TRUE	FALSE	FALSE	FALSE	FALSE	FALSE	FALSE	FALSE	FALSE	Cytosol	0	24	CHEMBL2387080	TASELISIB	FALSE	3	FALSE	Reactome	Cytokine Signaling in Immune system	2	0	3	8	0	0	54.53
PIK3R1	ENSG00000145675	phosphoinositide-3-kinase regulatory subunit 1	553	5	FALSE	TRUE	FALSE	TRUE	FALSE	FALSE	FALSE	FALSE	FALSE	FALSE	FALSE	FALSE	Cytosol	0	24	CHEMBL2326966	SF-1126	FALSE	2	FALSE	KEGG	HIF-1 signaling pathway	2	0	3	8	0	0	54.53
PIK3R1	ENSG00000145675	phosphoinositide-3-kinase regulatory subunit 1	553	5	FALSE	TRUE	FALSE	TRUE	FALSE	FALSE	FALSE	FALSE	FALSE	FALSE	FALSE	FALSE	Cytosol	0	24	CHEMBL4297181	SAMOTOLISIB	FALSE	2	FALSE	Reactome	Cytokine Signaling in Immune system	2	0	3	8	0	0	54.53
PIK3R1	ENSG00000145675	phosphoinositide-3-kinase regulatory subunit 1	553	5	FALSE	TRUE	FALSE	TRUE	FALSE	FALSE	FALSE	FALSE	FALSE	FALSE	FALSE	FALSE	Cytosol	0	24	CHEMBL4297181	SAMOTOLISIB	FALSE	2	FALSE	KEGG	HIF-1 signaling pathway	2	0	3	8	0	0	54.53
PIK3R1	ENSG00000145675	phosphoinositide-3-kinase regulatory subunit 1	553	5	FALSE	TRUE	FALSE	TRUE	FALSE	FALSE	FALSE	FALSE	FALSE	FALSE	FALSE	FALSE	Cytosol	0	24	CHEMBL1922094	APITOLISIB	FALSE	2	FALSE	Reactome	Cytokine Signaling in Immune system	2	0	3	8	0	0	54.53
PIK3R1	ENSG00000145675	phosphoinositide-3-kinase regulatory subunit 1	553	5	FALSE	TRUE	FALSE	TRUE	FALSE	FALSE	FALSE	FALSE	FALSE	FALSE	FALSE	FALSE	Cytosol	0	24	CHEMBL3545366	VOXTALISIB	FALSE	2	FALSE	Reactome	Cytokine Signaling in Immune system	2	0	3	8	0	0	54.53
PIK3R1	ENSG00000145675	phosphoinositide-3-kinase regulatory subunit 1	553	5	FALSE	TRUE	FALSE	TRUE	FALSE	FALSE	FALSE	FALSE	FALSE	FALSE	FALSE	FALSE	Cytosol	0	24	CHEMBL1879463	DACTOLISIB	FALSE	3	FALSE	KEGG	HIF-1 signaling pathway	2	0	3	8	0	0	54.53
PIK3R1	ENSG00000145675	phosphoinositide-3-kinase regulatory subunit 1	553	5	FALSE	TRUE	FALSE	TRUE	FALSE	FALSE	FALSE	FALSE	FALSE	FALSE	FALSE	FALSE	Cytosol	0	24	CHEMBL1879463	DACTOLISIB	FALSE	3	FALSE	Reactome	Cytokine Signaling in Immune system	2	0	3	8	0	0	54.53
PIK3R1	ENSG00000145675	phosphoinositide-3-kinase regulatory subunit 1	553	5	FALSE	TRUE	FALSE	TRUE	FALSE	FALSE	FALSE	FALSE	FALSE	FALSE	FALSE	FALSE	Cytosol	0	24	CHEMBL3813842	PAXALISIB	FALSE	2	FALSE	KEGG	HIF-1 signaling pathway	2	0	3	8	0	0	54.53
PIK3R1	ENSG00000145675	phosphoinositide-3-kinase regulatory subunit 1	553	5	FALSE	TRUE	FALSE	TRUE	FALSE	FALSE	FALSE	FALSE	FALSE	FALSE	FALSE	FALSE	Cytosol	0	24	CHEMBL1234354	PF-04691502	FALSE	2	FALSE	Reactome	Cytokine Signaling in Immune system	2	0	3	8	0	0	54.53
PIK3R1	ENSG00000145675	phosphoinositide-3-kinase regulatory subunit 1	553	5	FALSE	TRUE	FALSE	TRUE	FALSE	FALSE	FALSE	FALSE	FALSE	FALSE	FALSE	FALSE	Cytosol	0	24	CHEMBL1879463	DACTOLISIB	FALSE	3	FALSE	Reactome	Cytokine Signaling in Immune system	2	0	3	8	0	0	54.53
PIK3R1	ENSG00000145675	phosphoinositide-3-kinase regulatory subunit 1	553	5	FALSE	TRUE	FALSE	TRUE	FALSE	FALSE	FALSE	FALSE	FALSE	FALSE	FALSE	FALSE	Cytosol	0	24	CHEMBL521851	PICTILISIB	FALSE	2	FALSE	KEGG	HIF-1 signaling pathway	2	0	3	8	0	0	54.53
TP53	ENSG00000141510	tumor protein p53	2433	5	FALSE	TRUE	FALSE	TRUE	FALSE	FALSE	FALSE	FALSE	FALSE	FALSE	TRUE	FALSE	Cytoplasm	2	8	CHEMBL2108280	CENERSEN	FALSE	2	FALSE	Reactome	SUMOylation	9	0	3	5	0	0	52.83
TP53	ENSG00000141510	tumor protein p53	2433	5	FALSE	TRUE	FALSE	TRUE	FALSE	FALSE	FALSE	FALSE	FALSE	FALSE	TRUE	FALSE	Cytoplasm	2	8	CHEMBL2108585	CONTUSUGENE LADENOVEC	FALSE	2	FALSE	Reactome	Cytokine Signaling in Immune system	9	0	3	5	0	0	52.83
TP53	ENSG00000141510	tumor protein p53	2433	5	FALSE	TRUE	FALSE	TRUE	FALSE	FALSE	FALSE	FALSE	FALSE	FALSE	TRUE	FALSE	Cytoplasm	2	8	CHEMBL2108585	CONTUSUGENE LADENOVEC	FALSE	2	FALSE	Reactome	Regulation of TP53 Activity	9	0	3	5	0	0	52.83
TP53	ENSG00000141510	tumor protein p53	2433	5	FALSE	TRUE	FALSE	TRUE	FALSE	FALSE	FALSE	FALSE	FALSE	FALSE	TRUE	FALSE	Cytoplasm	2	8	CHEMBL2402737	IDASANUTLIN	FALSE	3	FALSE	Reactome	Cytokine Signaling in Immune system	9	0	3	5	0	0	52.83
TP53	ENSG00000141510	tumor protein p53	2433	5	FALSE	TRUE	FALSE	TRUE	FALSE	FALSE	FALSE	FALSE	FALSE	FALSE	TRUE	FALSE	Cytoplasm	2	8	CHEMBL3186011	EPRENETAPOPT	FALSE	3	FALSE	Reactome	Cell Cycle Checkpoints	9	0	3	5	0	0	52.83
TP53	ENSG00000141510	tumor protein p53	2433	5	FALSE	TRUE	FALSE	TRUE	FALSE	FALSE	FALSE	FALSE	FALSE	FALSE	TRUE	FALSE	Cytoplasm	2	8	CHEMBL3186011	EPRENETAPOPT	FALSE	3	FALSE	Reactome	Cytokine Signaling in Immune system	9	0	3	5	0	0	52.83
TP53	ENSG00000141510	tumor protein p53	2433	5	FALSE	TRUE	FALSE	TRUE	FALSE	FALSE	FALSE	FALSE	FALSE	FALSE	TRUE	FALSE	Cytoplasm	2	8	CHEMBL2108585	CONTUSUGENE LADENOVEC	FALSE	2	FALSE	Reactome	G2/M Checkpoints	9	0	3	5	0	0	52.83
TP53	ENSG00000141510	tumor protein p53	2433	5	FALSE	TRUE	FALSE	TRUE	FALSE	FALSE	FALSE	FALSE	FALSE	FALSE	TRUE	FALSE	Cytoplasm	2	8	CHEMBL3125702	AMG-232	FALSE	2	FALSE	Reactome	SUMO E3 ligases SUMOylate target proteins	9	0	3	5	0	0	52.83
TP53	ENSG00000141510	tumor protein p53	2433	5	FALSE	TRUE	FALSE	TRUE	FALSE	FALSE	FALSE	FALSE	FALSE	FALSE	TRUE	FALSE	Cytoplasm	2	8	CHEMBL2108585	CONTUSUGENE LADENOVEC	FALSE	2	FALSE	Reactome	Cytokine Signaling in Immune system	9	0	3	5	0	0	52.83
TP53	ENSG00000141510	tumor protein p53	2433	5	FALSE	TRUE	FALSE	TRUE	FALSE	FALSE	FALSE	FALSE	FALSE	FALSE	TRUE	FALSE	Cytoplasm	2	8	CHEMBL2402737	IDASANUTLIN	FALSE	3	FALSE	Reactome	Regulation of TP53 Activity	9	0	3	5	0	0	52.83
TP53	ENSG00000141510	tumor protein p53	2433	5	FALSE	TRUE	FALSE	TRUE	FALSE	FALSE	FALSE	FALSE	FALSE	FALSE	TRUE	FALSE	Cytoplasm	2	8	CHEMBL4297574	TEPRASIRAN	FALSE	3	FALSE	Reactome	SUMOylation	9	0	3	5	0	0	52.83
TP53	ENSG00000141510	tumor protein p53	2433	5	FALSE	TRUE	FALSE	TRUE	FALSE	FALSE	FALSE	FALSE	FALSE	FALSE	TRUE	FALSE	Cytoplasm	2	8	CHEMBL3125702	AMG-232	FALSE	2	FALSE	Reactome	Cytokine Signaling in Immune system	9	0	3	5	0	0	52.83
TP53	ENSG00000141510	tumor protein p53	2433	5	FALSE	TRUE	FALSE	TRUE	FALSE	FALSE	FALSE	FALSE	FALSE	FALSE	TRUE	FALSE	Cytoplasm	2	8	CHEMBL2402737	IDASANUTLIN	FALSE	3	FALSE	Reactome	SUMO E3 ligases SUMOylate target proteins	9	0	3	5	0	0	52.83
TP53	ENSG00000141510	tumor protein p53	2433	5	FALSE	TRUE	FALSE	TRUE	FALSE	FALSE	FALSE	FALSE	FALSE	FALSE	TRUE	FALSE	Cytoplasm	2	8	CHEMBL2402737	IDASANUTLIN	FALSE	3	FALSE	Reactome	SUMOylation	9	0	3	5	0	0	52.83
TP53	ENSG00000141510	tumor protein p53	2433	5	FALSE	TRUE	FALSE	TRUE	FALSE	FALSE	FALSE	FALSE	FALSE	FALSE	TRUE	FALSE	Cytoplasm	2	8	CHEMBL2108585	CONTUSUGENE LADENOVEC	FALSE	2	FALSE	Reactome	G2/M Checkpoints	9	0	3	5	0	0	52.83
TP53	ENSG00000141510	tumor protein p53	2433	5	FALSE	TRUE	FALSE	TRUE	FALSE	FALSE	FALSE	FALSE	FALSE	FALSE	TRUE	FALSE	Cytoplasm	2	8	CHEMBL3186011	EPRENETAPOPT	FALSE	3	FALSE	Reactome	G2/M Checkpoints	9	0	3	5	0	0	52.83
TP53	ENSG00000141510	tumor protein p53	2433	5	FALSE	TRUE	FALSE	TRUE	FALSE	FALSE	FALSE	FALSE	FALSE	FALSE	TRUE	FALSE	Cytoplasm	2	8	CHEMBL2108585	CONTUSUGENE LADENOVEC	FALSE	2	FALSE	Reactome	Cytokine Signaling in Immune system	9	0	3	5	0	0	52.83
TP53	ENSG00000141510	tumor protein p53	2433	5	FALSE	TRUE	FALSE	TRUE	FALSE	FALSE	FALSE	FALSE	FALSE	FALSE	TRUE	FALSE	Cytoplasm	2	8	CHEMBL2219776	CENERSEN SODIUM	FALSE	2	FALSE	Reactome	Cytokine Signaling in Immune system	9	0	3	5	0	0	52.83
TP53	ENSG00000141510	tumor protein p53	2433	5	FALSE	TRUE	FALSE	TRUE	FALSE	FALSE	FALSE	FALSE	FALSE	FALSE	TRUE	FALSE	Cytoplasm	2	8	CHEMBL2402737	IDASANUTLIN	FALSE	3	FALSE	Reactome	DNA Repair	9	0	3	5	0	0	52.83
TP53	ENSG00000141510	tumor protein p53	2433	5	FALSE	TRUE	FALSE	TRUE	FALSE	FALSE	FALSE	FALSE	FALSE	FALSE	TRUE	FALSE	Cytoplasm	2	8	CHEMBL3186011	EPRENETAPOPT	FALSE	3	FALSE	Reactome	DNA Repair	9	0	3	5	0	0	52.83
TP53	ENSG00000141510	tumor protein p53	2433	5	FALSE	TRUE	FALSE	TRUE	FALSE	FALSE	FALSE	FALSE	FALSE	FALSE	TRUE	FALSE	Cytoplasm	2	8	CHEMBL3186011	EPRENETAPOPT	FALSE	3	FALSE	Reactome	DNA Repair	9	0	3	5	0	0	52.83
TP53	ENSG00000141510	tumor protein p53	2433	5	FALSE	TRUE	FALSE	TRUE	FALSE	FALSE	FALSE	FALSE	FALSE	FALSE	TRUE	FALSE	Cytoplasm	2	8	CHEMBL2219776	CENERSEN SODIUM	FALSE	2	FALSE	Reactome	G2/M Checkpoints	9	0	3	5	0	0	52.83
TP53	ENSG00000141510	tumor protein p53	2433	5	FALSE	TRUE	FALSE	TRUE	FALSE	FALSE	FALSE	FALSE	FALSE	FALSE	TRUE	FALSE	Cytoplasm	2	8	CHEMBL3125702	AMG-232	FALSE	2	FALSE	Reactome	Cytokine Signaling in Immune system	9	0	3	5	0	0	52.83
TP53	ENSG00000141510	tumor protein p53	2433	5	FALSE	TRUE	FALSE	TRUE	FALSE	FALSE	FALSE	FALSE	FALSE	FALSE	TRUE	FALSE	Cytoplasm	2	8	CHEMBL3186011	EPRENETAPOPT	FALSE	3	FALSE	Reactome	Regulation of TP53 Activity	9	0	3	5	0	0	52.83
TP53	ENSG00000141510	tumor protein p53	2433	5	FALSE	TRUE	FALSE	TRUE	FALSE	FALSE	FALSE	FALSE	FALSE	FALSE	TRUE	FALSE	Cytoplasm	2	8	CHEMBL3186011	EPRENETAPOPT	FALSE	3	FALSE	Reactome	Cytokine Signaling in Immune system	9	0	3	5	0	0	52.83
TP53	ENSG00000141510	tumor protein p53	2433	5	FALSE	TRUE	FALSE	TRUE	FALSE	FALSE	FALSE	FALSE	FALSE	FALSE	TRUE	FALSE	Cytoplasm	2	8	CHEMBL3125702	AMG-232	FALSE	2	FALSE	Reactome	G2/M Checkpoints	9	0	3	5	0	0	52.83
TP53	ENSG00000141510	tumor protein p53	2433	5	FALSE	TRUE	FALSE	TRUE	FALSE	FALSE	FALSE	FALSE	FALSE	FALSE	TRUE	FALSE	Cytoplasm	2	8	CHEMBL2219776	CENERSEN SODIUM	FALSE	2	FALSE	Reactome	SUMO E3 ligases SUMOylate target proteins	9	0	3	5	0	0	52.83
TP53	ENSG00000141510	tumor protein p53	2433	5	FALSE	TRUE	FALSE	TRUE	FALSE	FALSE	FALSE	FALSE	FALSE	FALSE	TRUE	FALSE	Cytoplasm	2	8	CHEMBL2402737	IDASANUTLIN	FALSE	3	FALSE	Reactome	G2/M Checkpoints	9	0	3	5	0	0	52.83
TP53	ENSG00000141510	tumor protein p53	2433	5	FALSE	TRUE	FALSE	TRUE	FALSE	FALSE	FALSE	FALSE	FALSE	FALSE	TRUE	FALSE	Cytoplasm	2	8	CHEMBL3186011	EPRENETAPOPT	FALSE	3	FALSE	Reactome	G2/M Checkpoints	9	0	3	5	0	0	52.83
TP53	ENSG00000141510	tumor protein p53	2433	5	FALSE	TRUE	FALSE	TRUE	FALSE	FALSE	FALSE	FALSE	FALSE	FALSE	TRUE	FALSE	Cytoplasm	2	8	CHEMBL2108585	CONTUSUGENE LADENOVEC	FALSE	2	FALSE	Reactome	DNA Repair	9	0	3	5	0	0	52.83
TP53	ENSG00000141510	tumor protein p53	2433	5	FALSE	TRUE	FALSE	TRUE	FALSE	FALSE	FALSE	FALSE	FALSE	FALSE	TRUE	FALSE	Cytoplasm	2	8	CHEMBL2108280	CENERSEN	FALSE	2	FALSE	Reactome	Regulation of TP53 Activity	9	0	3	5	0	0	52.83
TP53	ENSG00000141510	tumor protein p53	2433	5	FALSE	TRUE	FALSE	TRUE	FALSE	FALSE	FALSE	FALSE	FALSE	FALSE	TRUE	FALSE	Cytoplasm	2	8	CHEMBL2402737	IDASANUTLIN	FALSE	3	FALSE	Reactome	Cytokine Signaling in Immune system	9	0	3	5	0	0	52.83
TP53	ENSG00000141510	tumor protein p53	2433	5	FALSE	TRUE	FALSE	TRUE	FALSE	FALSE	FALSE	FALSE	FALSE	FALSE	TRUE	FALSE	Cytoplasm	2	8	CHEMBL2108585	CONTUSUGENE LADENOVEC	FALSE	2	FALSE	Reactome	SUMOylation	9	0	3	5	0	0	52.83
TP53	ENSG00000141510	tumor protein p53	2433	5	FALSE	TRUE	FALSE	TRUE	FALSE	FALSE	FALSE	FALSE	FALSE	FALSE	TRUE	FALSE	Cytoplasm	2	8	CHEMBL3125702	AMG-232	FALSE	2	FALSE	Reactome	SUMOylation	9	0	3	5	0	0	52.83
TP53	ENSG00000141510	tumor protein p53	2433	5	FALSE	TRUE	FALSE	TRUE	FALSE	FALSE	FALSE	FALSE	FALSE	FALSE	TRUE	FALSE	Cytoplasm	2	8	CHEMBL2108280	CENERSEN	FALSE	2	FALSE	Reactome	Cytokine Signaling in Immune system	9	0	3	5	0	0	52.83
TP53	ENSG00000141510	tumor protein p53	2433	5	FALSE	TRUE	FALSE	TRUE	FALSE	FALSE	FALSE	FALSE	FALSE	FALSE	TRUE	FALSE	Cytoplasm	2	8	CHEMBL4091801	APG115	FALSE	2	FALSE	Reactome	SUMOylation	9	0	3	5	0	0	52.83
TP53	ENSG00000141510	tumor protein p53	2433	5	FALSE	TRUE	FALSE	TRUE	FALSE	FALSE	FALSE	FALSE	FALSE	FALSE	TRUE	FALSE	Cytoplasm	2	8	CHEMBL3186011	EPRENETAPOPT	FALSE	3	FALSE	Reactome	G2/M Checkpoints	9	0	3	5	0	0	52.83
TP53	ENSG00000141510	tumor protein p53	2433	5	FALSE	TRUE	FALSE	TRUE	FALSE	FALSE	FALSE	FALSE	FALSE	FALSE	TRUE	FALSE	Cytoplasm	2	8	CHEMBL2108280	CENERSEN	FALSE	2	FALSE	Reactome	G2/M Checkpoints	9	0	3	5	0	0	52.83
TP53	ENSG00000141510	tumor protein p53	2433	5	FALSE	TRUE	FALSE	TRUE	FALSE	FALSE	FALSE	FALSE	FALSE	FALSE	TRUE	FALSE	Cytoplasm	2	8	CHEMBL2108280	CENERSEN	FALSE	2	FALSE	Reactome	SUMO E3 ligases SUMOylate target proteins	9	0	3	5	0	0	52.83
TP53	ENSG00000141510	tumor protein p53	2433	5	FALSE	TRUE	FALSE	TRUE	FALSE	FALSE	FALSE	FALSE	FALSE	FALSE	TRUE	FALSE	Cytoplasm	2	8	CHEMBL2108280	CENERSEN	FALSE	2	FALSE	Reactome	Cell Cycle Checkpoints	9	0	3	5	0	0	52.83
TP53	ENSG00000141510	tumor protein p53	2433	5	FALSE	TRUE	FALSE	TRUE	FALSE	FALSE	FALSE	FALSE	FALSE	FALSE	TRUE	FALSE	Cytoplasm	2	8	CHEMBL2402737	IDASANUTLIN	FALSE	3	FALSE	Reactome	DNA Repair	9	0	3	5	0	0	52.83
TP53	ENSG00000141510	tumor protein p53	2433	5	FALSE	TRUE	FALSE	TRUE	FALSE	FALSE	FALSE	FALSE	FALSE	FALSE	TRUE	FALSE	Cytoplasm	2	8	CHEMBL3125702	AMG-232	FALSE	2	FALSE	Reactome	G2/M Checkpoints	9	0	3	5	0	0	52.83
TP53	ENSG00000141510	tumor protein p53	2433	5	FALSE	TRUE	FALSE	TRUE	FALSE	FALSE	FALSE	FALSE	FALSE	FALSE	TRUE	FALSE	Cytoplasm	2	8	CHEMBL3125702	AMG-232	FALSE	2	FALSE	Reactome	Cytokine Signaling in Immune system	9	0	3	5	0	0	52.83
TP53	ENSG00000141510	tumor protein p53	2433	5	FALSE	TRUE	FALSE	TRUE	FALSE	FALSE	FALSE	FALSE	FALSE	FALSE	TRUE	FALSE	Cytoplasm	2	8	CHEMBL3186011	EPRENETAPOPT	FALSE	3	FALSE	Reactome	Regulation of TP53 Activity	9	0	3	5	0	0	52.83
TP53	ENSG00000141510	tumor protein p53	2433	5	FALSE	TRUE	FALSE	TRUE	FALSE	FALSE	FALSE	FALSE	FALSE	FALSE	TRUE	FALSE	Cytoplasm	2	8	CHEMBL4297574	TEPRASIRAN	FALSE	3	FALSE	Reactome	Regulation of TP53 Activity	9	0	3	5	0	0	52.83
TP53	ENSG00000141510	tumor protein p53	2433	5	FALSE	TRUE	FALSE	TRUE	FALSE	FALSE	FALSE	FALSE	FALSE	FALSE	TRUE	FALSE	Cytoplasm	2	8	CHEMBL3125702	AMG-232	FALSE	2	FALSE	Reactome	SUMOylation	9	0	3	5	0	0	52.83
TP53	ENSG00000141510	tumor protein p53	2433	5	FALSE	TRUE	FALSE	TRUE	FALSE	FALSE	FALSE	FALSE	FALSE	FALSE	TRUE	FALSE	Cytoplasm	2	8	CHEMBL2108585	CONTUSUGENE LADENOVEC	FALSE	2	FALSE	Reactome	G2/M Checkpoints	9	0	3	5	0	0	52.83
TP53	ENSG00000141510	tumor protein p53	2433	5	FALSE	TRUE	FALSE	TRUE	FALSE	FALSE	FALSE	FALSE	FALSE	FALSE	TRUE	FALSE	Cytoplasm	2	8	CHEMBL3125702	AMG-232	FALSE	2	FALSE	Reactome	G2/M Checkpoints	9	0	3	5	0	0	52.83
TP53	ENSG00000141510	tumor protein p53	2433	5	FALSE	TRUE	FALSE	TRUE	FALSE	FALSE	FALSE	FALSE	FALSE	FALSE	TRUE	FALSE	Cytoplasm	2	8	CHEMBL3125702	AMG-232	FALSE	2	FALSE	Reactome	DNA Repair	9	0	3	5	0	0	52.83
TP53	ENSG00000141510	tumor protein p53	2433	5	FALSE	TRUE	FALSE	TRUE	FALSE	FALSE	FALSE	FALSE	FALSE	FALSE	TRUE	FALSE	Cytoplasm	2	8	CHEMBL2108280	CENERSEN	FALSE	2	FALSE	Reactome	DNA Repair	9	0	3	5	0	0	52.83
TP53	ENSG00000141510	tumor protein p53	2433	5	FALSE	TRUE	FALSE	TRUE	FALSE	FALSE	FALSE	FALSE	FALSE	FALSE	TRUE	FALSE	Cytoplasm	2	8	CHEMBL3125702	AMG-232	FALSE	2	FALSE	Reactome	DNA Repair	9	0	3	5	0	0	52.83
TP53	ENSG00000141510	tumor protein p53	2433	5	FALSE	TRUE	FALSE	TRUE	FALSE	FALSE	FALSE	FALSE	FALSE	FALSE	TRUE	FALSE	Cytoplasm	2	8	CHEMBL4091801	APG115	FALSE	2	FALSE	Reactome	G2/M Checkpoints	9	0	3	5	0	0	52.83
TP53	ENSG00000141510	tumor protein p53	2433	5	FALSE	TRUE	FALSE	TRUE	FALSE	FALSE	FALSE	FALSE	FALSE	FALSE	TRUE	FALSE	Cytoplasm	2	8	CHEMBL4297574	TEPRASIRAN	FALSE	3	FALSE	Reactome	DNA Repair	9	0	3	5	0	0	52.83
TP53	ENSG00000141510	tumor protein p53	2433	5	FALSE	TRUE	FALSE	TRUE	FALSE	FALSE	FALSE	FALSE	FALSE	FALSE	TRUE	FALSE	Cytoplasm	2	8	CHEMBL2108585	CONTUSUGENE LADENOVEC	FALSE	2	FALSE	Reactome	Transcriptional Regulation by TP53	9	0	3	5	0	0	52.83
TP53	ENSG00000141510	tumor protein p53	2433	5	FALSE	TRUE	FALSE	TRUE	FALSE	FALSE	FALSE	FALSE	FALSE	FALSE	TRUE	FALSE	Cytoplasm	2	8	CHEMBL3186011	EPRENETAPOPT	FALSE	3	FALSE	Reactome	SUMO E3 ligases SUMOylate target proteins	9	0	3	5	0	0	52.83
TP53	ENSG00000141510	tumor protein p53	2433	5	FALSE	TRUE	FALSE	TRUE	FALSE	FALSE	FALSE	FALSE	FALSE	FALSE	TRUE	FALSE	Cytoplasm	2	8	CHEMBL2108585	CONTUSUGENE LADENOVEC	FALSE	2	FALSE	Reactome	Cytokine Signaling in Immune system	9	0	3	5	0	0	52.83
TP53	ENSG00000141510	tumor protein p53	2433	5	FALSE	TRUE	FALSE	TRUE	FALSE	FALSE	FALSE	FALSE	FALSE	FALSE	TRUE	FALSE	Cytoplasm	2	8	CHEMBL3125702	AMG-232	FALSE	2	FALSE	Reactome	G2/M Checkpoints	9	0	3	5	0	0	52.83
TP53	ENSG00000141510	tumor protein p53	2433	5	FALSE	TRUE	FALSE	TRUE	FALSE	FALSE	FALSE	FALSE	FALSE	FALSE	TRUE	FALSE	Cytoplasm	2	8	CHEMBL2402737	IDASANUTLIN	FALSE	3	FALSE	Reactome	Regulation of TP53 Activity	9	0	3	5	0	0	52.83
TP53	ENSG00000141510	tumor protein p53	2433	5	FALSE	TRUE	FALSE	TRUE	FALSE	FALSE	FALSE	FALSE	FALSE	FALSE	TRUE	FALSE	Cytoplasm	2	8	CHEMBL3125702	AMG-232	FALSE	2	FALSE	Reactome	Regulation of TP53 Activity	9	0	3	5	0	0	52.83
TP53	ENSG00000141510	tumor protein p53	2433	5	FALSE	TRUE	FALSE	TRUE	FALSE	FALSE	FALSE	FALSE	FALSE	FALSE	TRUE	FALSE	Cytoplasm	2	8	CHEMBL4091801	APG115	FALSE	2	FALSE	Reactome	Cytokine Signaling in Immune system	9	0	3	5	0	0	52.83
TP53	ENSG00000141510	tumor protein p53	2433	5	FALSE	TRUE	FALSE	TRUE	FALSE	FALSE	FALSE	FALSE	FALSE	FALSE	TRUE	FALSE	Cytoplasm	2	8	CHEMBL2108585	CONTUSUGENE LADENOVEC	FALSE	2	FALSE	Reactome	Cytokine Signaling in Immune system	9	0	3	5	0	0	52.83
TP53	ENSG00000141510	tumor protein p53	2433	5	FALSE	TRUE	FALSE	TRUE	FALSE	FALSE	FALSE	FALSE	FALSE	FALSE	TRUE	FALSE	Cytoplasm	2	8	CHEMBL2108585	CONTUSUGENE LADENOVEC	FALSE	2	FALSE	Reactome	G2/M Checkpoints	9	0	3	5	0	0	52.83
TP53	ENSG00000141510	tumor protein p53	2433	5	FALSE	TRUE	FALSE	TRUE	FALSE	FALSE	FALSE	FALSE	FALSE	FALSE	TRUE	FALSE	Cytoplasm	2	8	CHEMBL3186011	EPRENETAPOPT	FALSE	3	FALSE	Reactome	SUMO E3 ligases SUMOylate target proteins	9	0	3	5	0	0	52.83
TP53	ENSG00000141510	tumor protein p53	2433	5	FALSE	TRUE	FALSE	TRUE	FALSE	FALSE	FALSE	FALSE	FALSE	FALSE	TRUE	FALSE	Cytoplasm	2	8	CHEMBL2108585	CONTUSUGENE LADENOVEC	FALSE	2	FALSE	Reactome	SUMO E3 ligases SUMOylate target proteins	9	0	3	5	0	0	52.83
TP53	ENSG00000141510	tumor protein p53	2433	5	FALSE	TRUE	FALSE	TRUE	FALSE	FALSE	FALSE	FALSE	FALSE	FALSE	TRUE	FALSE	Cytoplasm	2	8	CHEMBL2219776	CENERSEN SODIUM	FALSE	2	FALSE	Reactome	Regulation of TP53 Activity	9	0	3	5	0	0	52.83
TP53	ENSG00000141510	tumor protein p53	2433	5	FALSE	TRUE	FALSE	TRUE	FALSE	FALSE	FALSE	FALSE	FALSE	FALSE	TRUE	FALSE	Cytoplasm	2	8	CHEMBL2108585	CONTUSUGENE LADENOVEC	FALSE	2	FALSE	Reactome	G2/M Checkpoints	9	0	3	5	0	0	52.83
TP53	ENSG00000141510	tumor protein p53	2433	5	FALSE	TRUE	FALSE	TRUE	FALSE	FALSE	FALSE	FALSE	FALSE	FALSE	TRUE	FALSE	Cytoplasm	2	8	CHEMBL3186011	EPRENETAPOPT	FALSE	3	FALSE	Reactome	Cytokine Signaling in Immune system	9	0	3	5	0	0	52.83
TP53	ENSG00000141510	tumor protein p53	2433	5	FALSE	TRUE	FALSE	TRUE	FALSE	FALSE	FALSE	FALSE	FALSE	FALSE	TRUE	FALSE	Cytoplasm	2	8	CHEMBL3125702	AMG-232	FALSE	2	FALSE	Reactome	G2/M Checkpoints	9	0	3	5	0	0	52.83
TP53	ENSG00000141510	tumor protein p53	2433	5	FALSE	TRUE	FALSE	TRUE	FALSE	FALSE	FALSE	FALSE	FALSE	FALSE	TRUE	FALSE	Cytoplasm	2	8	CHEMBL3186011	EPRENETAPOPT	FALSE	3	FALSE	Reactome	SUMO E3 ligases SUMOylate target proteins	9	0	3	5	0	0	52.83
TP53	ENSG00000141510	tumor protein p53	2433	5	FALSE	TRUE	FALSE	TRUE	FALSE	FALSE	FALSE	FALSE	FALSE	FALSE	TRUE	FALSE	Cytoplasm	2	8	CHEMBL2108280	CENERSEN	FALSE	2	FALSE	Reactome	G2/M Checkpoints	9	0	3	5	0	0	52.83
TP53	ENSG00000141510	tumor protein p53	2433	5	FALSE	TRUE	FALSE	TRUE	FALSE	FALSE	FALSE	FALSE	FALSE	FALSE	TRUE	FALSE	Cytoplasm	2	8	CHEMBL3186011	EPRENETAPOPT	FALSE	3	FALSE	Reactome	Cytokine Signaling in Immune system	9	0	3	5	0	0	52.83
TP53	ENSG00000141510	tumor protein p53	2433	5	FALSE	TRUE	FALSE	TRUE	FALSE	FALSE	FALSE	FALSE	FALSE	FALSE	TRUE	FALSE	Cytoplasm	2	8	CHEMBL2402737	IDASANUTLIN	FALSE	3	FALSE	Reactome	SUMO E3 ligases SUMOylate target proteins	9	0	3	5	0	0	52.83
TP53	ENSG00000141510	tumor protein p53	2433	5	FALSE	TRUE	FALSE	TRUE	FALSE	FALSE	FALSE	FALSE	FALSE	FALSE	TRUE	FALSE	Cytoplasm	2	8	CHEMBL2402737	IDASANUTLIN	FALSE	3	FALSE	Reactome	SUMOylation	9	0	3	5	0	0	52.83
TP53	ENSG00000141510	tumor protein p53	2433	5	FALSE	TRUE	FALSE	TRUE	FALSE	FALSE	FALSE	FALSE	FALSE	FALSE	TRUE	FALSE	Cytoplasm	2	8	CHEMBL3125702	AMG-232	FALSE	2	FALSE	Reactome	Regulation of TP53 Activity	9	0	3	5	0	0	52.83
TP53	ENSG00000141510	tumor protein p53	2433	5	FALSE	TRUE	FALSE	TRUE	FALSE	FALSE	FALSE	FALSE	FALSE	FALSE	TRUE	FALSE	Cytoplasm	2	8	CHEMBL2219776	CENERSEN SODIUM	FALSE	2	FALSE	Reactome	DNA Repair	9	0	3	5	0	0	52.83
TP53	ENSG00000141510	tumor protein p53	2433	5	FALSE	TRUE	FALSE	TRUE	FALSE	FALSE	FALSE	FALSE	FALSE	FALSE	TRUE	FALSE	Cytoplasm	2	8	CHEMBL2108585	CONTUSUGENE LADENOVEC	FALSE	2	FALSE	Reactome	DNA Repair	9	0	3	5	0	0	52.83
TP53	ENSG00000141510	tumor protein p53	2433	5	FALSE	TRUE	FALSE	TRUE	FALSE	FALSE	FALSE	FALSE	FALSE	FALSE	TRUE	FALSE	Cytoplasm	2	8	CHEMBL3125702	AMG-232	FALSE	2	FALSE	Reactome	SUMO E3 ligases SUMOylate target proteins	9	0	3	5	0	0	52.83
TP53	ENSG00000141510	tumor protein p53	2433	5	FALSE	TRUE	FALSE	TRUE	FALSE	FALSE	FALSE	FALSE	FALSE	FALSE	TRUE	FALSE	Cytoplasm	2	8	CHEMBL2108280	CENERSEN	FALSE	2	FALSE	Reactome	SUMOylation	9	0	3	5	0	0	52.83
TP53	ENSG00000141510	tumor protein p53	2433	5	FALSE	TRUE	FALSE	TRUE	FALSE	FALSE	FALSE	FALSE	FALSE	FALSE	TRUE	FALSE	Cytoplasm	2	8	CHEMBL3125702	AMG-232	FALSE	2	FALSE	Reactome	Transcriptional Regulation by TP53	9	0	3	5	0	0	52.83
TP53	ENSG00000141510	tumor protein p53	2433	5	FALSE	TRUE	FALSE	TRUE	FALSE	FALSE	FALSE	FALSE	FALSE	FALSE	TRUE	FALSE	Cytoplasm	2	8	CHEMBL2108280	CENERSEN	FALSE	2	FALSE	Reactome	G2/M Checkpoints	9	0	3	5	0	0	52.83
TP53	ENSG00000141510	tumor protein p53	2433	5	FALSE	TRUE	FALSE	TRUE	FALSE	FALSE	FALSE	FALSE	FALSE	FALSE	TRUE	FALSE	Cytoplasm	2	8	CHEMBL2108280	CENERSEN	FALSE	2	FALSE	Reactome	SUMO E3 ligases SUMOylate target proteins	9	0	3	5	0	0	52.83
TP53	ENSG00000141510	tumor protein p53	2433	5	FALSE	TRUE	FALSE	TRUE	FALSE	FALSE	FALSE	FALSE	FALSE	FALSE	TRUE	FALSE	Cytoplasm	2	8	CHEMBL4091801	APG115	FALSE	2	FALSE	Reactome	DNA Repair	9	0	3	5	0	0	52.83
TP53	ENSG00000141510	tumor protein p53	2433	5	FALSE	TRUE	FALSE	TRUE	FALSE	FALSE	FALSE	FALSE	FALSE	FALSE	TRUE	FALSE	Cytoplasm	2	8	CHEMBL2108585	CONTUSUGENE LADENOVEC	FALSE	2	FALSE	Reactome	Regulation of TP53 Activity	9	0	3	5	0	0	52.83
TP53	ENSG00000141510	tumor protein p53	2433	5	FALSE	TRUE	FALSE	TRUE	FALSE	FALSE	FALSE	FALSE	FALSE	FALSE	TRUE	FALSE	Cytoplasm	2	8	CHEMBL3186011	EPRENETAPOPT	FALSE	3	FALSE	Reactome	Transcriptional Regulation by TP53	9	0	3	5	0	0	52.83
TP53	ENSG00000141510	tumor protein p53	2433	5	FALSE	TRUE	FALSE	TRUE	FALSE	FALSE	FALSE	FALSE	FALSE	FALSE	TRUE	FALSE	Cytoplasm	2	8	CHEMBL2108585	CONTUSUGENE LADENOVEC	FALSE	2	FALSE	Reactome	Regulation of TP53 Activity	9	0	3	5	0	0	52.83
TP53	ENSG00000141510	tumor protein p53	2433	5	FALSE	TRUE	FALSE	TRUE	FALSE	FALSE	FALSE	FALSE	FALSE	FALSE	TRUE	FALSE	Cytoplasm	2	8	CHEMBL3125702	AMG-232	FALSE	2	FALSE	Reactome	SUMO E3 ligases SUMOylate target proteins	9	0	3	5	0	0	52.83
TP53	ENSG00000141510	tumor protein p53	2433	5	FALSE	TRUE	FALSE	TRUE	FALSE	FALSE	FALSE	FALSE	FALSE	FALSE	TRUE	FALSE	Cytoplasm	2	8	CHEMBL2108280	CENERSEN	FALSE	2	FALSE	Reactome	Cytokine Signaling in Immune system	9	0	3	5	0	0	52.83
TP53	ENSG00000141510	tumor protein p53	2433	5	FALSE	TRUE	FALSE	TRUE	FALSE	FALSE	FALSE	FALSE	FALSE	FALSE	TRUE	FALSE	Cytoplasm	2	8	CHEMBL3125702	AMG-232	FALSE	2	FALSE	Reactome	Cytokine Signaling in Immune system	9	0	3	5	0	0	52.83
TP53	ENSG00000141510	tumor protein p53	2433	5	FALSE	TRUE	FALSE	TRUE	FALSE	FALSE	FALSE	FALSE	FALSE	FALSE	TRUE	FALSE	Cytoplasm	2	8	CHEMBL2108280	CENERSEN	FALSE	2	FALSE	Reactome	Regulation of TP53 Activity	9	0	3	5	0	0	52.83
TP53	ENSG00000141510	tumor protein p53	2433	5	FALSE	TRUE	FALSE	TRUE	FALSE	FALSE	FALSE	FALSE	FALSE	FALSE	TRUE	FALSE	Cytoplasm	2	8	CHEMBL3125702	AMG-232	FALSE	2	FALSE	Reactome	G2/M Checkpoints	9	0	3	5	0	0	52.83
TP53	ENSG00000141510	tumor protein p53	2433	5	FALSE	TRUE	FALSE	TRUE	FALSE	FALSE	FALSE	FALSE	FALSE	FALSE	TRUE	FALSE	Cytoplasm	2	8	CHEMBL3125702	AMG-232	FALSE	2	FALSE	Reactome	Cell Cycle Checkpoints	9	0	3	5	0	0	52.83
TP53	ENSG00000141510	tumor protein p53	2433	5	FALSE	TRUE	FALSE	TRUE	FALSE	FALSE	FALSE	FALSE	FALSE	FALSE	TRUE	FALSE	Cytoplasm	2	8	CHEMBL2402737	IDASANUTLIN	FALSE	3	FALSE	Reactome	Regulation of TP53 Activity	9	0	3	5	0	0	52.83
TP53	ENSG00000141510	tumor protein p53	2433	5	FALSE	TRUE	FALSE	TRUE	FALSE	FALSE	FALSE	FALSE	FALSE	FALSE	TRUE	FALSE	Cytoplasm	2	8	CHEMBL4091801	APG115	FALSE	2	FALSE	Reactome	G2/M DNA damage checkpoint	9	0	3	5	0	0	52.83
TP53	ENSG00000141510	tumor protein p53	2433	5	FALSE	TRUE	FALSE	TRUE	FALSE	FALSE	FALSE	FALSE	FALSE	FALSE	TRUE	FALSE	Cytoplasm	2	8	CHEMBL2402737	IDASANUTLIN	FALSE	3	FALSE	Reactome	G2/M DNA damage checkpoint	9	0	3	5	0	0	52.83
TP53	ENSG00000141510	tumor protein p53	2433	5	FALSE	TRUE	FALSE	TRUE	FALSE	FALSE	FALSE	FALSE	FALSE	FALSE	TRUE	FALSE	Cytoplasm	2	8	CHEMBL2402737	IDASANUTLIN	FALSE	3	FALSE	Reactome	Cell Cycle Checkpoints	9	0	3	5	0	0	52.83
TP53	ENSG00000141510	tumor protein p53	2433	5	FALSE	TRUE	FALSE	TRUE	FALSE	FALSE	FALSE	FALSE	FALSE	FALSE	TRUE	FALSE	Cytoplasm	2	8	CHEMBL3186011	EPRENETAPOPT	FALSE	3	FALSE	Reactome	DNA Repair	9	0	3	5	0	0	52.83
TP53	ENSG00000141510	tumor protein p53	2433	5	FALSE	TRUE	FALSE	TRUE	FALSE	FALSE	FALSE	FALSE	FALSE	FALSE	TRUE	FALSE	Cytoplasm	2	8	CHEMBL2402737	IDASANUTLIN	FALSE	3	FALSE	Reactome	Transcriptional Regulation by TP53	9	0	3	5	0	0	52.83
TP53	ENSG00000141510	tumor protein p53	2433	5	FALSE	TRUE	FALSE	TRUE	FALSE	FALSE	FALSE	FALSE	FALSE	FALSE	TRUE	FALSE	Cytoplasm	2	8	CHEMBL3186011	EPRENETAPOPT	FALSE	3	FALSE	Reactome	SUMOylation	9	0	3	5	0	0	52.83
TP53	ENSG00000141510	tumor protein p53	2433	5	FALSE	TRUE	FALSE	TRUE	FALSE	FALSE	FALSE	FALSE	FALSE	FALSE	TRUE	FALSE	Cytoplasm	2	8	CHEMBL2402737	IDASANUTLIN	FALSE	3	FALSE	Reactome	DNA Repair	9	0	3	5	0	0	52.83
TP53	ENSG00000141510	tumor protein p53	2433	5	FALSE	TRUE	FALSE	TRUE	FALSE	FALSE	FALSE	FALSE	FALSE	FALSE	TRUE	FALSE	Cytoplasm	2	8	CHEMBL3125702	AMG-232	FALSE	2	FALSE	Reactome	Cytokine Signaling in Immune system	9	0	3	5	0	0	52.83
TP53	ENSG00000141510	tumor protein p53	2433	5	FALSE	TRUE	FALSE	TRUE	FALSE	FALSE	FALSE	FALSE	FALSE	FALSE	TRUE	FALSE	Cytoplasm	2	8	CHEMBL3125702	AMG-232	FALSE	2	FALSE	Reactome	G2/M Checkpoints	9	0	3	5	0	0	52.83
TP53	ENSG00000141510	tumor protein p53	2433	5	FALSE	TRUE	FALSE	TRUE	FALSE	FALSE	FALSE	FALSE	FALSE	FALSE	TRUE	FALSE	Cytoplasm	2	8	CHEMBL2402737	IDASANUTLIN	FALSE	3	FALSE	Reactome	Cytokine Signaling in Immune system	9	0	3	5	0	0	52.83
TP53	ENSG00000141510	tumor protein p53	2433	5	FALSE	TRUE	FALSE	TRUE	FALSE	FALSE	FALSE	FALSE	FALSE	FALSE	TRUE	FALSE	Cytoplasm	2	8	CHEMBL3125702	AMG-232	FALSE	2	FALSE	Reactome	Regulation of TP53 Activity	9	0	3	5	0	0	52.83
TP53	ENSG00000141510	tumor protein p53	2433	5	FALSE	TRUE	FALSE	TRUE	FALSE	FALSE	FALSE	FALSE	FALSE	FALSE	TRUE	FALSE	Cytoplasm	2	8	CHEMBL4091801	APG115	FALSE	2	FALSE	Reactome	SUMO E3 ligases SUMOylate target proteins	9	0	3	5	0	0	52.83
TP53	ENSG00000141510	tumor protein p53	2433	5	FALSE	TRUE	FALSE	TRUE	FALSE	FALSE	FALSE	FALSE	FALSE	FALSE	TRUE	FALSE	Cytoplasm	2	8	CHEMBL2108280	CENERSEN	FALSE	2	FALSE	Reactome	DNA Repair	9	0	3	5	0	0	52.83
TP53	ENSG00000141510	tumor protein p53	2433	5	FALSE	TRUE	FALSE	TRUE	FALSE	FALSE	FALSE	FALSE	FALSE	FALSE	TRUE	FALSE	Cytoplasm	2	8	CHEMBL2219776	CENERSEN SODIUM	FALSE	2	FALSE	Reactome	Cell Cycle Checkpoints	9	0	3	5	0	0	52.83
TP53	ENSG00000141510	tumor protein p53	2433	5	FALSE	TRUE	FALSE	TRUE	FALSE	FALSE	FALSE	FALSE	FALSE	FALSE	TRUE	FALSE	Cytoplasm	2	8	CHEMBL2108585	CONTUSUGENE LADENOVEC	FALSE	2	FALSE	Reactome	DNA Repair	9	0	3	5	0	0	52.83
TP53	ENSG00000141510	tumor protein p53	2433	5	FALSE	TRUE	FALSE	TRUE	FALSE	FALSE	FALSE	FALSE	FALSE	FALSE	TRUE	FALSE	Cytoplasm	2	8	CHEMBL3186011	EPRENETAPOPT	FALSE	3	FALSE	Reactome	G2/M DNA damage checkpoint	9	0	3	5	0	0	52.83
TP53	ENSG00000141510	tumor protein p53	2433	5	FALSE	TRUE	FALSE	TRUE	FALSE	FALSE	FALSE	FALSE	FALSE	FALSE	TRUE	FALSE	Cytoplasm	2	8	CHEMBL3186011	EPRENETAPOPT	FALSE	3	FALSE	Reactome	DNA Repair	9	0	3	5	0	0	52.83
TP53	ENSG00000141510	tumor protein p53	2433	5	FALSE	TRUE	FALSE	TRUE	FALSE	FALSE	FALSE	FALSE	FALSE	FALSE	TRUE	FALSE	Cytoplasm	2	8	CHEMBL3125702	AMG-232	FALSE	2	FALSE	Reactome	Regulation of TP53 Activity	9	0	3	5	0	0	52.83
TP53	ENSG00000141510	tumor protein p53	2433	5	FALSE	TRUE	FALSE	TRUE	FALSE	FALSE	FALSE	FALSE	FALSE	FALSE	TRUE	FALSE	Cytoplasm	2	8	CHEMBL3125702	AMG-232	FALSE	2	FALSE	Reactome	G2/M DNA damage checkpoint	9	0	3	5	0	0	52.83
TP53	ENSG00000141510	tumor protein p53	2433	5	FALSE	TRUE	FALSE	TRUE	FALSE	FALSE	FALSE	FALSE	FALSE	FALSE	TRUE	FALSE	Cytoplasm	2	8	CHEMBL3125702	AMG-232	FALSE	2	FALSE	Reactome	SUMO E3 ligases SUMOylate target proteins	9	0	3	5	0	0	52.83
TP53	ENSG00000141510	tumor protein p53	2433	5	FALSE	TRUE	FALSE	TRUE	FALSE	FALSE	FALSE	FALSE	FALSE	FALSE	TRUE	FALSE	Cytoplasm	2	8	CHEMBL3186011	EPRENETAPOPT	FALSE	3	FALSE	Reactome	SUMOylation	9	0	3	5	0	0	52.83
TP53	ENSG00000141510	tumor protein p53	2433	5	FALSE	TRUE	FALSE	TRUE	FALSE	FALSE	FALSE	FALSE	FALSE	FALSE	TRUE	FALSE	Cytoplasm	2	8	CHEMBL4297574	TEPRASIRAN	FALSE	3	FALSE	Reactome	Cytokine Signaling in Immune system	9	0	3	5	0	0	52.83
TP53	ENSG00000141510	tumor protein p53	2433	5	FALSE	TRUE	FALSE	TRUE	FALSE	FALSE	FALSE	FALSE	FALSE	FALSE	TRUE	FALSE	Cytoplasm	2	8	CHEMBL3125702	AMG-232	FALSE	2	FALSE	Reactome	Cell Cycle Checkpoints	9	0	3	5	0	0	52.83
TP53	ENSG00000141510	tumor protein p53	2433	5	FALSE	TRUE	FALSE	TRUE	FALSE	FALSE	FALSE	FALSE	FALSE	FALSE	TRUE	FALSE	Cytoplasm	2	8	CHEMBL4297574	TEPRASIRAN	FALSE	3	FALSE	Reactome	G2/M Checkpoints	9	0	3	5	0	0	52.83
TP53	ENSG00000141510	tumor protein p53	2433	5	FALSE	TRUE	FALSE	TRUE	FALSE	FALSE	FALSE	FALSE	FALSE	FALSE	TRUE	FALSE	Cytoplasm	2	8	CHEMBL2402737	IDASANUTLIN	FALSE	3	FALSE	Reactome	G2/M Checkpoints	9	0	3	5	0	0	52.83
TP53	ENSG00000141510	tumor protein p53	2433	5	FALSE	TRUE	FALSE	TRUE	FALSE	FALSE	FALSE	FALSE	FALSE	FALSE	TRUE	FALSE	Cytoplasm	2	8	CHEMBL2108585	CONTUSUGENE LADENOVEC	FALSE	2	FALSE	Reactome	SUMO E3 ligases SUMOylate target proteins	9	0	3	5	0	0	52.83
TP53	ENSG00000141510	tumor protein p53	2433	5	FALSE	TRUE	FALSE	TRUE	FALSE	FALSE	FALSE	FALSE	FALSE	FALSE	TRUE	FALSE	Cytoplasm	2	8	CHEMBL4091801	APG115	FALSE	2	FALSE	Reactome	Transcriptional Regulation by TP53	9	0	3	5	0	0	52.83
TP53	ENSG00000141510	tumor protein p53	2433	5	FALSE	TRUE	FALSE	TRUE	FALSE	FALSE	FALSE	FALSE	FALSE	FALSE	TRUE	FALSE	Cytoplasm	2	8	CHEMBL3186011	EPRENETAPOPT	FALSE	3	FALSE	Reactome	SUMOylation	9	0	3	5	0	0	52.83
TP53	ENSG00000141510	tumor protein p53	2433	5	FALSE	TRUE	FALSE	TRUE	FALSE	FALSE	FALSE	FALSE	FALSE	FALSE	TRUE	FALSE	Cytoplasm	2	8	CHEMBL2108585	CONTUSUGENE LADENOVEC	FALSE	2	FALSE	Reactome	Cell Cycle Checkpoints	9	0	3	5	0	0	52.83
TP53	ENSG00000141510	tumor protein p53	2433	5	FALSE	TRUE	FALSE	TRUE	FALSE	FALSE	FALSE	FALSE	FALSE	FALSE	TRUE	FALSE	Cytoplasm	2	8	CHEMBL3125702	AMG-232	FALSE	2	FALSE	Reactome	SUMOylation	9	0	3	5	0	0	52.83
TP53	ENSG00000141510	tumor protein p53	2433	5	FALSE	TRUE	FALSE	TRUE	FALSE	FALSE	FALSE	FALSE	FALSE	FALSE	TRUE	FALSE	Cytoplasm	2	8	CHEMBL2108280	CENERSEN	FALSE	2	FALSE	Reactome	G2/M DNA damage checkpoint	9	0	3	5	0	0	52.83
TP53	ENSG00000141510	tumor protein p53	2433	5	FALSE	TRUE	FALSE	TRUE	FALSE	FALSE	FALSE	FALSE	FALSE	FALSE	TRUE	FALSE	Cytoplasm	2	8	CHEMBL3125702	AMG-232	FALSE	2	FALSE	Reactome	Regulation of TP53 Activity	9	0	3	5	0	0	52.83
TP53	ENSG00000141510	tumor protein p53	2433	5	FALSE	TRUE	FALSE	TRUE	FALSE	FALSE	FALSE	FALSE	FALSE	FALSE	TRUE	FALSE	Cytoplasm	2	8	CHEMBL3125702	AMG-232	FALSE	2	FALSE	Reactome	SUMOylation	9	0	3	5	0	0	52.83
TP53	ENSG00000141510	tumor protein p53	2433	5	FALSE	TRUE	FALSE	TRUE	FALSE	FALSE	FALSE	FALSE	FALSE	FALSE	TRUE	FALSE	Cytoplasm	2	8	CHEMBL2108585	CONTUSUGENE LADENOVEC	FALSE	2	FALSE	Reactome	SUMO E3 ligases SUMOylate target proteins	9	0	3	5	0	0	52.83
TP53	ENSG00000141510	tumor protein p53	2433	5	FALSE	TRUE	FALSE	TRUE	FALSE	FALSE	FALSE	FALSE	FALSE	FALSE	TRUE	FALSE	Cytoplasm	2	8	CHEMBL3125702	AMG-232	FALSE	2	FALSE	Reactome	Cytokine Signaling in Immune system	9	0	3	5	0	0	52.83
TP53	ENSG00000141510	tumor protein p53	2433	5	FALSE	TRUE	FALSE	TRUE	FALSE	FALSE	FALSE	FALSE	FALSE	FALSE	TRUE	FALSE	Cytoplasm	2	8	CHEMBL4091801	APG115	FALSE	2	FALSE	Reactome	Regulation of TP53 Activity	9	0	3	5	0	0	52.83
TP53	ENSG00000141510	tumor protein p53	2433	5	FALSE	TRUE	FALSE	TRUE	FALSE	FALSE	FALSE	FALSE	FALSE	FALSE	TRUE	FALSE	Cytoplasm	2	8	CHEMBL2108585	CONTUSUGENE LADENOVEC	FALSE	2	FALSE	Reactome	Regulation of TP53 Activity	9	0	3	5	0	0	52.83
TP53	ENSG00000141510	tumor protein p53	2433	5	FALSE	TRUE	FALSE	TRUE	FALSE	FALSE	FALSE	FALSE	FALSE	FALSE	TRUE	FALSE	Cytoplasm	2	8	CHEMBL3186011	EPRENETAPOPT	FALSE	3	FALSE	Reactome	G2/M Checkpoints	9	0	3	5	0	0	52.83
TP53	ENSG00000141510	tumor protein p53	2433	5	FALSE	TRUE	FALSE	TRUE	FALSE	FALSE	FALSE	FALSE	FALSE	FALSE	TRUE	FALSE	Cytoplasm	2	8	CHEMBL2402737	IDASANUTLIN	FALSE	3	FALSE	Reactome	Transcriptional Regulation by TP53	9	0	3	5	0	0	52.83
TP53	ENSG00000141510	tumor protein p53	2433	5	FALSE	TRUE	FALSE	TRUE	FALSE	FALSE	FALSE	FALSE	FALSE	FALSE	TRUE	FALSE	Cytoplasm	2	8	CHEMBL2402737	IDASANUTLIN	FALSE	3	FALSE	Reactome	G2/M Checkpoints	9	0	3	5	0	0	52.83
TP53	ENSG00000141510	tumor protein p53	2433	5	FALSE	TRUE	FALSE	TRUE	FALSE	FALSE	FALSE	FALSE	FALSE	FALSE	TRUE	FALSE	Cytoplasm	2	8	CHEMBL2108280	CENERSEN	FALSE	2	FALSE	Reactome	SUMOylation	9	0	3	5	0	0	52.83
TP53	ENSG00000141510	tumor protein p53	2433	5	FALSE	TRUE	FALSE	TRUE	FALSE	FALSE	FALSE	FALSE	FALSE	FALSE	TRUE	FALSE	Cytoplasm	2	8	CHEMBL3125702	AMG-232	FALSE	2	FALSE	Reactome	Cell Cycle Checkpoints	9	0	3	5	0	0	52.83
TP53	ENSG00000141510	tumor protein p53	2433	5	FALSE	TRUE	FALSE	TRUE	FALSE	FALSE	FALSE	FALSE	FALSE	FALSE	TRUE	FALSE	Cytoplasm	2	8	CHEMBL2108280	CENERSEN	FALSE	2	FALSE	Reactome	DNA Repair	9	0	3	5	0	0	52.83
TP53	ENSG00000141510	tumor protein p53	2433	5	FALSE	TRUE	FALSE	TRUE	FALSE	FALSE	FALSE	FALSE	FALSE	FALSE	TRUE	FALSE	Cytoplasm	2	8	CHEMBL3125702	AMG-232	FALSE	2	FALSE	Reactome	Regulation of TP53 Activity	9	0	3	5	0	0	52.83
TP53	ENSG00000141510	tumor protein p53	2433	5	FALSE	TRUE	FALSE	TRUE	FALSE	FALSE	FALSE	FALSE	FALSE	FALSE	TRUE	FALSE	Cytoplasm	2	8	CHEMBL3186011	EPRENETAPOPT	FALSE	3	FALSE	Reactome	G2/M DNA damage checkpoint	9	0	3	5	0	0	52.83
TP53	ENSG00000141510	tumor protein p53	2433	5	FALSE	TRUE	FALSE	TRUE	FALSE	FALSE	FALSE	FALSE	FALSE	FALSE	TRUE	FALSE	Cytoplasm	2	8	CHEMBL2108585	CONTUSUGENE LADENOVEC	FALSE	2	FALSE	Reactome	G2/M DNA damage checkpoint	9	0	3	5	0	0	52.83
TP53	ENSG00000141510	tumor protein p53	2433	5	FALSE	TRUE	FALSE	TRUE	FALSE	FALSE	FALSE	FALSE	FALSE	FALSE	TRUE	FALSE	Cytoplasm	2	8	CHEMBL3125702	AMG-232	FALSE	2	FALSE	Reactome	SUMOylation	9	0	3	5	0	0	52.83
TP53	ENSG00000141510	tumor protein p53	2433	5	FALSE	TRUE	FALSE	TRUE	FALSE	FALSE	FALSE	FALSE	FALSE	FALSE	TRUE	FALSE	Cytoplasm	2	8	CHEMBL4297574	TEPRASIRAN	FALSE	3	FALSE	Reactome	SUMO E3 ligases SUMOylate target proteins	9	0	3	5	0	0	52.83
TP53	ENSG00000141510	tumor protein p53	2433	5	FALSE	TRUE	FALSE	TRUE	FALSE	FALSE	FALSE	FALSE	FALSE	FALSE	TRUE	FALSE	Cytoplasm	2	8	CHEMBL2108280	CENERSEN	FALSE	2	FALSE	Reactome	SUMO E3 ligases SUMOylate target proteins	9	0	3	5	0	0	52.83
TP53	ENSG00000141510	tumor protein p53	2433	5	FALSE	TRUE	FALSE	TRUE	FALSE	FALSE	FALSE	FALSE	FALSE	FALSE	TRUE	FALSE	Cytoplasm	2	8	CHEMBL2402737	IDASANUTLIN	FALSE	3	FALSE	Reactome	SUMO E3 ligases SUMOylate target proteins	9	0	3	5	0	0	52.83
TP53	ENSG00000141510	tumor protein p53	2433	5	FALSE	TRUE	FALSE	TRUE	FALSE	FALSE	FALSE	FALSE	FALSE	FALSE	TRUE	FALSE	Cytoplasm	2	8	CHEMBL2108280	CENERSEN	FALSE	2	FALSE	Reactome	Transcriptional Regulation by TP53	9	0	3	5	0	0	52.83
TP53	ENSG00000141510	tumor protein p53	2433	5	FALSE	TRUE	FALSE	TRUE	FALSE	FALSE	FALSE	FALSE	FALSE	FALSE	TRUE	FALSE	Cytoplasm	2	8	CHEMBL3125702	AMG-232	FALSE	2	FALSE	Reactome	SUMOylation	9	0	3	5	0	0	52.83
TP53	ENSG00000141510	tumor protein p53	2433	5	FALSE	TRUE	FALSE	TRUE	FALSE	FALSE	FALSE	FALSE	FALSE	FALSE	TRUE	FALSE	Cytoplasm	2	8	CHEMBL3125702	AMG-232	FALSE	2	FALSE	Reactome	Transcriptional Regulation by TP53	9	0	3	5	0	0	52.83
TP53	ENSG00000141510	tumor protein p53	2433	5	FALSE	TRUE	FALSE	TRUE	FALSE	FALSE	FALSE	FALSE	FALSE	FALSE	TRUE	FALSE	Cytoplasm	2	8	CHEMBL2108585	CONTUSUGENE LADENOVEC	FALSE	2	FALSE	Reactome	DNA Repair	9	0	3	5	0	0	52.83
TP53	ENSG00000141510	tumor protein p53	2433	5	FALSE	TRUE	FALSE	TRUE	FALSE	FALSE	FALSE	FALSE	FALSE	FALSE	TRUE	FALSE	Cytoplasm	2	8	CHEMBL2108585	CONTUSUGENE LADENOVEC	FALSE	2	FALSE	Reactome	Cell Cycle Checkpoints	9	0	3	5	0	0	52.83
TP53	ENSG00000141510	tumor protein p53	2433	5	FALSE	TRUE	FALSE	TRUE	FALSE	FALSE	FALSE	FALSE	FALSE	FALSE	TRUE	FALSE	Cytoplasm	2	8	CHEMBL4297574	TEPRASIRAN	FALSE	3	FALSE	Reactome	Transcriptional Regulation by TP53	9	0	3	5	0	0	52.83
TP53	ENSG00000141510	tumor protein p53	2433	5	FALSE	TRUE	FALSE	TRUE	FALSE	FALSE	FALSE	FALSE	FALSE	FALSE	TRUE	FALSE	Cytoplasm	2	8	CHEMBL3125702	AMG-232	FALSE	2	FALSE	Reactome	G2/M DNA damage checkpoint	9	0	3	5	0	0	52.83
TP53	ENSG00000141510	tumor protein p53	2433	5	FALSE	TRUE	FALSE	TRUE	FALSE	FALSE	FALSE	FALSE	FALSE	FALSE	TRUE	FALSE	Cytoplasm	2	8	CHEMBL2108585	CONTUSUGENE LADENOVEC	FALSE	2	FALSE	Reactome	G2/M DNA damage checkpoint	9	0	3	5	0	0	52.83
TP53	ENSG00000141510	tumor protein p53	2433	5	FALSE	TRUE	FALSE	TRUE	FALSE	FALSE	FALSE	FALSE	FALSE	FALSE	TRUE	FALSE	Cytoplasm	2	8	CHEMBL2108585	CONTUSUGENE LADENOVEC	FALSE	2	FALSE	Reactome	SUMOylation	9	0	3	5	0	0	52.83
TP53	ENSG00000141510	tumor protein p53	2433	5	FALSE	TRUE	FALSE	TRUE	FALSE	FALSE	FALSE	FALSE	FALSE	FALSE	TRUE	FALSE	Cytoplasm	2	8	CHEMBL3186011	EPRENETAPOPT	FALSE	3	FALSE	Reactome	SUMOylation	9	0	3	5	0	0	52.83
TP53	ENSG00000141510	tumor protein p53	2433	5	FALSE	TRUE	FALSE	TRUE	FALSE	FALSE	FALSE	FALSE	FALSE	FALSE	TRUE	FALSE	Cytoplasm	2	8	CHEMBL3125702	AMG-232	FALSE	2	FALSE	Reactome	DNA Repair	9	0	3	5	0	0	52.83
TP53	ENSG00000141510	tumor protein p53	2433	5	FALSE	TRUE	FALSE	TRUE	FALSE	FALSE	FALSE	FALSE	FALSE	FALSE	TRUE	FALSE	Cytoplasm	2	8	CHEMBL3125702	AMG-232	FALSE	2	FALSE	Reactome	Cytokine Signaling in Immune system	9	0	3	5	0	0	52.83
TP53	ENSG00000141510	tumor protein p53	2433	5	FALSE	TRUE	FALSE	TRUE	FALSE	FALSE	FALSE	FALSE	FALSE	FALSE	TRUE	FALSE	Cytoplasm	2	8	CHEMBL3186011	EPRENETAPOPT	FALSE	3	FALSE	Reactome	Regulation of TP53 Activity	9	0	3	5	0	0	52.83
TP53	ENSG00000141510	tumor protein p53	2433	5	FALSE	TRUE	FALSE	TRUE	FALSE	FALSE	FALSE	FALSE	FALSE	FALSE	TRUE	FALSE	Cytoplasm	2	8	CHEMBL3125702	AMG-232	FALSE	2	FALSE	Reactome	SUMO E3 ligases SUMOylate target proteins	9	0	3	5	0	0	52.83
TP53	ENSG00000141510	tumor protein p53	2433	5	FALSE	TRUE	FALSE	TRUE	FALSE	FALSE	FALSE	FALSE	FALSE	FALSE	TRUE	FALSE	Cytoplasm	2	8	CHEMBL3186011	EPRENETAPOPT	FALSE	3	FALSE	Reactome	Regulation of TP53 Activity	9	0	3	5	0	0	52.83
TP53	ENSG00000141510	tumor protein p53	2433	5	FALSE	TRUE	FALSE	TRUE	FALSE	FALSE	FALSE	FALSE	FALSE	FALSE	TRUE	FALSE	Cytoplasm	2	8	CHEMBL3125702	AMG-232	FALSE	2	FALSE	Reactome	SUMO E3 ligases SUMOylate target proteins	9	0	3	5	0	0	52.83
TP53	ENSG00000141510	tumor protein p53	2433	5	FALSE	TRUE	FALSE	TRUE	FALSE	FALSE	FALSE	FALSE	FALSE	FALSE	TRUE	FALSE	Cytoplasm	2	8	CHEMBL2219776	CENERSEN SODIUM	FALSE	2	FALSE	Reactome	SUMOylation	9	0	3	5	0	0	52.83
TP53	ENSG00000141510	tumor protein p53	2433	5	FALSE	TRUE	FALSE	TRUE	FALSE	FALSE	FALSE	FALSE	FALSE	FALSE	TRUE	FALSE	Cytoplasm	2	8	CHEMBL2108585	CONTUSUGENE LADENOVEC	FALSE	2	FALSE	Reactome	Cell Cycle Checkpoints	9	0	3	5	0	0	52.83
TP53	ENSG00000141510	tumor protein p53	2433	5	FALSE	TRUE	FALSE	TRUE	FALSE	FALSE	FALSE	FALSE	FALSE	FALSE	TRUE	FALSE	Cytoplasm	2	8	CHEMBL2108280	CENERSEN	FALSE	2	FALSE	Reactome	Cell Cycle Checkpoints	9	0	3	5	0	0	52.83
TP53	ENSG00000141510	tumor protein p53	2433	5	FALSE	TRUE	FALSE	TRUE	FALSE	FALSE	FALSE	FALSE	FALSE	FALSE	TRUE	FALSE	Cytoplasm	2	8	CHEMBL3125702	AMG-232	FALSE	2	FALSE	Reactome	Transcriptional Regulation by TP53	9	0	3	5	0	0	52.83
TP53	ENSG00000141510	tumor protein p53	2433	5	FALSE	TRUE	FALSE	TRUE	FALSE	FALSE	FALSE	FALSE	FALSE	FALSE	TRUE	FALSE	Cytoplasm	2	8	CHEMBL3186011	EPRENETAPOPT	FALSE	3	FALSE	Reactome	Cell Cycle Checkpoints	9	0	3	5	0	0	52.83
TP53	ENSG00000141510	tumor protein p53	2433	5	FALSE	TRUE	FALSE	TRUE	FALSE	FALSE	FALSE	FALSE	FALSE	FALSE	TRUE	FALSE	Cytoplasm	2	8	CHEMBL2219776	CENERSEN SODIUM	FALSE	2	FALSE	Reactome	G2/M DNA damage checkpoint	9	0	3	5	0	0	52.83
TP53	ENSG00000141510	tumor protein p53	2433	5	FALSE	TRUE	FALSE	TRUE	FALSE	FALSE	FALSE	FALSE	FALSE	FALSE	TRUE	FALSE	Cytoplasm	2	8	CHEMBL3125702	AMG-232	FALSE	2	FALSE	Reactome	Transcriptional Regulation by TP53	9	0	3	5	0	0	52.83
TP53	ENSG00000141510	tumor protein p53	2433	5	FALSE	TRUE	FALSE	TRUE	FALSE	FALSE	FALSE	FALSE	FALSE	FALSE	TRUE	FALSE	Cytoplasm	2	8	CHEMBL3125702	AMG-232	FALSE	2	FALSE	Reactome	SUMO E3 ligases SUMOylate target proteins	9	0	3	5	0	0	52.83
TP53	ENSG00000141510	tumor protein p53	2433	5	FALSE	TRUE	FALSE	TRUE	FALSE	FALSE	FALSE	FALSE	FALSE	FALSE	TRUE	FALSE	Cytoplasm	2	8	CHEMBL2402737	IDASANUTLIN	FALSE	3	FALSE	Reactome	SUMOylation	9	0	3	5	0	0	52.83
TP53	ENSG00000141510	tumor protein p53	2433	5	FALSE	TRUE	FALSE	TRUE	FALSE	FALSE	FALSE	FALSE	FALSE	FALSE	TRUE	FALSE	Cytoplasm	2	8	CHEMBL3186011	EPRENETAPOPT	FALSE	3	FALSE	Reactome	SUMO E3 ligases SUMOylate target proteins	9	0	3	5	0	0	52.83
TP53	ENSG00000141510	tumor protein p53	2433	5	FALSE	TRUE	FALSE	TRUE	FALSE	FALSE	FALSE	FALSE	FALSE	FALSE	TRUE	FALSE	Cytoplasm	2	8	CHEMBL2108280	CENERSEN	FALSE	2	FALSE	Reactome	Regulation of TP53 Activity	9	0	3	5	0	0	52.83
TP53	ENSG00000141510	tumor protein p53	2433	5	FALSE	TRUE	FALSE	TRUE	FALSE	FALSE	FALSE	FALSE	FALSE	FALSE	TRUE	FALSE	Cytoplasm	2	8	CHEMBL2108585	CONTUSUGENE LADENOVEC	FALSE	2	FALSE	Reactome	SUMO E3 ligases SUMOylate target proteins	9	0	3	5	0	0	52.83
TP53	ENSG00000141510	tumor protein p53	2433	5	FALSE	TRUE	FALSE	TRUE	FALSE	FALSE	FALSE	FALSE	FALSE	FALSE	TRUE	FALSE	Cytoplasm	2	8	CHEMBL3125702	AMG-232	FALSE	2	FALSE	Reactome	DNA Repair	9	0	3	5	0	0	52.83
TP53	ENSG00000141510	tumor protein p53	2433	5	FALSE	TRUE	FALSE	TRUE	FALSE	FALSE	FALSE	FALSE	FALSE	FALSE	TRUE	FALSE	Cytoplasm	2	8	CHEMBL2108585	CONTUSUGENE LADENOVEC	FALSE	2	FALSE	Reactome	G2/M DNA damage checkpoint	9	0	3	5	0	0	52.83
TP53	ENSG00000141510	tumor protein p53	2433	5	FALSE	TRUE	FALSE	TRUE	FALSE	FALSE	FALSE	FALSE	FALSE	FALSE	TRUE	FALSE	Cytoplasm	2	8	CHEMBL3125702	AMG-232	FALSE	2	FALSE	Reactome	Cell Cycle Checkpoints	9	0	3	5	0	0	52.83
TP53	ENSG00000141510	tumor protein p53	2433	5	FALSE	TRUE	FALSE	TRUE	FALSE	FALSE	FALSE	FALSE	FALSE	FALSE	TRUE	FALSE	Cytoplasm	2	8	CHEMBL2108585	CONTUSUGENE LADENOVEC	FALSE	2	FALSE	Reactome	Cell Cycle Checkpoints	9	0	3	5	0	0	52.83
TP53	ENSG00000141510	tumor protein p53	2433	5	FALSE	TRUE	FALSE	TRUE	FALSE	FALSE	FALSE	FALSE	FALSE	FALSE	TRUE	FALSE	Cytoplasm	2	8	CHEMBL3186011	EPRENETAPOPT	FALSE	3	FALSE	Reactome	Cell Cycle Checkpoints	9	0	3	5	0	0	52.83
TP53	ENSG00000141510	tumor protein p53	2433	5	FALSE	TRUE	FALSE	TRUE	FALSE	FALSE	FALSE	FALSE	FALSE	FALSE	TRUE	FALSE	Cytoplasm	2	8	CHEMBL2108280	CENERSEN	FALSE	2	FALSE	Reactome	Transcriptional Regulation by TP53	9	0	3	5	0	0	52.83
TP53	ENSG00000141510	tumor protein p53	2433	5	FALSE	TRUE	FALSE	TRUE	FALSE	FALSE	FALSE	FALSE	FALSE	FALSE	TRUE	FALSE	Cytoplasm	2	8	CHEMBL2402737	IDASANUTLIN	FALSE	3	FALSE	Reactome	G2/M DNA damage checkpoint	9	0	3	5	0	0	52.83
TP53	ENSG00000141510	tumor protein p53	2433	5	FALSE	TRUE	FALSE	TRUE	FALSE	FALSE	FALSE	FALSE	FALSE	FALSE	TRUE	FALSE	Cytoplasm	2	8	CHEMBL2402737	IDASANUTLIN	FALSE	3	FALSE	Reactome	Cell Cycle Checkpoints	9	0	3	5	0	0	52.83
TP53	ENSG00000141510	tumor protein p53	2433	5	FALSE	TRUE	FALSE	TRUE	FALSE	FALSE	FALSE	FALSE	FALSE	FALSE	TRUE	FALSE	Cytoplasm	2	8	CHEMBL2108585	CONTUSUGENE LADENOVEC	FALSE	2	FALSE	Reactome	SUMOylation	9	0	3	5	0	0	52.83
TP53	ENSG00000141510	tumor protein p53	2433	5	FALSE	TRUE	FALSE	TRUE	FALSE	FALSE	FALSE	FALSE	FALSE	FALSE	TRUE	FALSE	Cytoplasm	2	8	CHEMBL3125702	AMG-232	FALSE	2	FALSE	Reactome	DNA Repair	9	0	3	5	0	0	52.83
TP53	ENSG00000141510	tumor protein p53	2433	5	FALSE	TRUE	FALSE	TRUE	FALSE	FALSE	FALSE	FALSE	FALSE	FALSE	TRUE	FALSE	Cytoplasm	2	8	CHEMBL2108280	CENERSEN	FALSE	2	FALSE	Reactome	Cytokine Signaling in Immune system	9	0	3	5	0	0	52.83
TP53	ENSG00000141510	tumor protein p53	2433	5	FALSE	TRUE	FALSE	TRUE	FALSE	FALSE	FALSE	FALSE	FALSE	FALSE	TRUE	FALSE	Cytoplasm	2	8	CHEMBL3125702	AMG-232	FALSE	2	FALSE	Reactome	Regulation of TP53 Activity	9	0	3	5	0	0	52.83
TP53	ENSG00000141510	tumor protein p53	2433	5	FALSE	TRUE	FALSE	TRUE	FALSE	FALSE	FALSE	FALSE	FALSE	FALSE	TRUE	FALSE	Cytoplasm	2	8	CHEMBL2108585	CONTUSUGENE LADENOVEC	FALSE	2	FALSE	Reactome	SUMOylation	9	0	3	5	0	0	52.83
TP53	ENSG00000141510	tumor protein p53	2433	5	FALSE	TRUE	FALSE	TRUE	FALSE	FALSE	FALSE	FALSE	FALSE	FALSE	TRUE	FALSE	Cytoplasm	2	8	CHEMBL2108585	CONTUSUGENE LADENOVEC	FALSE	2	FALSE	Reactome	SUMO E3 ligases SUMOylate target proteins	9	0	3	5	0	0	52.83
TP53	ENSG00000141510	tumor protein p53	2433	5	FALSE	TRUE	FALSE	TRUE	FALSE	FALSE	FALSE	FALSE	FALSE	FALSE	TRUE	FALSE	Cytoplasm	2	8	CHEMBL3125702	AMG-232	FALSE	2	FALSE	Reactome	Transcriptional Regulation by TP53	9	0	3	5	0	0	52.83
TP53	ENSG00000141510	tumor protein p53	2433	5	FALSE	TRUE	FALSE	TRUE	FALSE	FALSE	FALSE	FALSE	FALSE	FALSE	TRUE	FALSE	Cytoplasm	2	8	CHEMBL3125702	AMG-232	FALSE	2	FALSE	Reactome	G2/M DNA damage checkpoint	9	0	3	5	0	0	52.83
TP53	ENSG00000141510	tumor protein p53	2433	5	FALSE	TRUE	FALSE	TRUE	FALSE	FALSE	FALSE	FALSE	FALSE	FALSE	TRUE	FALSE	Cytoplasm	2	8	CHEMBL3125702	AMG-232	FALSE	2	FALSE	Reactome	SUMOylation	9	0	3	5	0	0	52.83
TP53	ENSG00000141510	tumor protein p53	2433	5	FALSE	TRUE	FALSE	TRUE	FALSE	FALSE	FALSE	FALSE	FALSE	FALSE	TRUE	FALSE	Cytoplasm	2	8	CHEMBL3125702	AMG-232	FALSE	2	FALSE	Reactome	Transcriptional Regulation by TP53	9	0	3	5	0	0	52.83
TP53	ENSG00000141510	tumor protein p53	2433	5	FALSE	TRUE	FALSE	TRUE	FALSE	FALSE	FALSE	FALSE	FALSE	FALSE	TRUE	FALSE	Cytoplasm	2	8	CHEMBL3186011	EPRENETAPOPT	FALSE	3	FALSE	Reactome	G2/M DNA damage checkpoint	9	0	3	5	0	0	52.83
TP53	ENSG00000141510	tumor protein p53	2433	5	FALSE	TRUE	FALSE	TRUE	FALSE	FALSE	FALSE	FALSE	FALSE	FALSE	TRUE	FALSE	Cytoplasm	2	8	CHEMBL3186011	EPRENETAPOPT	FALSE	3	FALSE	Reactome	Transcriptional Regulation by TP53	9	0	3	5	0	0	52.83
TP53	ENSG00000141510	tumor protein p53	2433	5	FALSE	TRUE	FALSE	TRUE	FALSE	FALSE	FALSE	FALSE	FALSE	FALSE	TRUE	FALSE	Cytoplasm	2	8	CHEMBL3125702	AMG-232	FALSE	2	FALSE	Reactome	G2/M DNA damage checkpoint	9	0	3	5	0	0	52.83
TP53	ENSG00000141510	tumor protein p53	2433	5	FALSE	TRUE	FALSE	TRUE	FALSE	FALSE	FALSE	FALSE	FALSE	FALSE	TRUE	FALSE	Cytoplasm	2	8	CHEMBL2108280	CENERSEN	FALSE	2	FALSE	Reactome	G2/M DNA damage checkpoint	9	0	3	5	0	0	52.83
TP53	ENSG00000141510	tumor protein p53	2433	5	FALSE	TRUE	FALSE	TRUE	FALSE	FALSE	FALSE	FALSE	FALSE	FALSE	TRUE	FALSE	Cytoplasm	2	8	CHEMBL3125702	AMG-232	FALSE	2	FALSE	Reactome	G2/M DNA damage checkpoint	9	0	3	5	0	0	52.83
TP53	ENSG00000141510	tumor protein p53	2433	5	FALSE	TRUE	FALSE	TRUE	FALSE	FALSE	FALSE	FALSE	FALSE	FALSE	TRUE	FALSE	Cytoplasm	2	8	CHEMBL2108585	CONTUSUGENE LADENOVEC	FALSE	2	FALSE	Reactome	Regulation of TP53 Activity	9	0	3	5	0	0	52.83
TP53	ENSG00000141510	tumor protein p53	2433	5	FALSE	TRUE	FALSE	TRUE	FALSE	FALSE	FALSE	FALSE	FALSE	FALSE	TRUE	FALSE	Cytoplasm	2	8	CHEMBL2108585	CONTUSUGENE LADENOVEC	FALSE	2	FALSE	Reactome	G2/M DNA damage checkpoint	9	0	3	5	0	0	52.83
TP53	ENSG00000141510	tumor protein p53	2433	5	FALSE	TRUE	FALSE	TRUE	FALSE	FALSE	FALSE	FALSE	FALSE	FALSE	TRUE	FALSE	Cytoplasm	2	8	CHEMBL2108585	CONTUSUGENE LADENOVEC	FALSE	2	FALSE	Reactome	Transcriptional Regulation by TP53	9	0	3	5	0	0	52.83
TP53	ENSG00000141510	tumor protein p53	2433	5	FALSE	TRUE	FALSE	TRUE	FALSE	FALSE	FALSE	FALSE	FALSE	FALSE	TRUE	FALSE	Cytoplasm	2	8	CHEMBL3125702	AMG-232	FALSE	2	FALSE	Reactome	DNA Repair	9	0	3	5	0	0	52.83
TP53	ENSG00000141510	tumor protein p53	2433	5	FALSE	TRUE	FALSE	TRUE	FALSE	FALSE	FALSE	FALSE	FALSE	FALSE	TRUE	FALSE	Cytoplasm	2	8	CHEMBL2108585	CONTUSUGENE LADENOVEC	FALSE	2	FALSE	Reactome	Transcriptional Regulation by TP53	9	0	3	5	0	0	52.83
TP53	ENSG00000141510	tumor protein p53	2433	5	FALSE	TRUE	FALSE	TRUE	FALSE	FALSE	FALSE	FALSE	FALSE	FALSE	TRUE	FALSE	Cytoplasm	2	8	CHEMBL3125702	AMG-232	FALSE	2	FALSE	Reactome	G2/M DNA damage checkpoint	9	0	3	5	0	0	52.83
TP53	ENSG00000141510	tumor protein p53	2433	5	FALSE	TRUE	FALSE	TRUE	FALSE	FALSE	FALSE	FALSE	FALSE	FALSE	TRUE	FALSE	Cytoplasm	2	8	CHEMBL2108585	CONTUSUGENE LADENOVEC	FALSE	2	FALSE	Reactome	DNA Repair	9	0	3	5	0	0	52.83
TP53	ENSG00000141510	tumor protein p53	2433	5	FALSE	TRUE	FALSE	TRUE	FALSE	FALSE	FALSE	FALSE	FALSE	FALSE	TRUE	FALSE	Cytoplasm	2	8	CHEMBL4297574	TEPRASIRAN	FALSE	3	FALSE	Reactome	Cell Cycle Checkpoints	9	0	3	5	0	0	52.83
TP53	ENSG00000141510	tumor protein p53	2433	5	FALSE	TRUE	FALSE	TRUE	FALSE	FALSE	FALSE	FALSE	FALSE	FALSE	TRUE	FALSE	Cytoplasm	2	8	CHEMBL3125702	AMG-232	FALSE	2	FALSE	Reactome	Cell Cycle Checkpoints	9	0	3	5	0	0	52.83
TP53	ENSG00000141510	tumor protein p53	2433	5	FALSE	TRUE	FALSE	TRUE	FALSE	FALSE	FALSE	FALSE	FALSE	FALSE	TRUE	FALSE	Cytoplasm	2	8	CHEMBL2402737	IDASANUTLIN	FALSE	3	FALSE	Reactome	G2/M DNA damage checkpoint	9	0	3	5	0	0	52.83
TP53	ENSG00000141510	tumor protein p53	2433	5	FALSE	TRUE	FALSE	TRUE	FALSE	FALSE	FALSE	FALSE	FALSE	FALSE	TRUE	FALSE	Cytoplasm	2	8	CHEMBL3125702	AMG-232	FALSE	2	FALSE	Reactome	Cell Cycle Checkpoints	9	0	3	5	0	0	52.83
TP53	ENSG00000141510	tumor protein p53	2433	5	FALSE	TRUE	FALSE	TRUE	FALSE	FALSE	FALSE	FALSE	FALSE	FALSE	TRUE	FALSE	Cytoplasm	2	8	CHEMBL2402737	IDASANUTLIN	FALSE	3	FALSE	Reactome	Cell Cycle Checkpoints	9	0	3	5	0	0	52.83
TP53	ENSG00000141510	tumor protein p53	2433	5	FALSE	TRUE	FALSE	TRUE	FALSE	FALSE	FALSE	FALSE	FALSE	FALSE	TRUE	FALSE	Cytoplasm	2	8	CHEMBL3125702	AMG-232	FALSE	2	FALSE	Reactome	DNA Repair	9	0	3	5	0	0	52.83
TP53	ENSG00000141510	tumor protein p53	2433	5	FALSE	TRUE	FALSE	TRUE	FALSE	FALSE	FALSE	FALSE	FALSE	FALSE	TRUE	FALSE	Cytoplasm	2	8	CHEMBL2108585	CONTUSUGENE LADENOVEC	FALSE	2	FALSE	Reactome	SUMOylation	9	0	3	5	0	0	52.83
TP53	ENSG00000141510	tumor protein p53	2433	5	FALSE	TRUE	FALSE	TRUE	FALSE	FALSE	FALSE	FALSE	FALSE	FALSE	TRUE	FALSE	Cytoplasm	2	8	CHEMBL2108585	CONTUSUGENE LADENOVEC	FALSE	2	FALSE	Reactome	Cell Cycle Checkpoints	9	0	3	5	0	0	52.83
TP53	ENSG00000141510	tumor protein p53	2433	5	FALSE	TRUE	FALSE	TRUE	FALSE	FALSE	FALSE	FALSE	FALSE	FALSE	TRUE	FALSE	Cytoplasm	2	8	CHEMBL2108585	CONTUSUGENE LADENOVEC	FALSE	2	FALSE	Reactome	G2/M DNA damage checkpoint	9	0	3	5	0	0	52.83
TP53	ENSG00000141510	tumor protein p53	2433	5	FALSE	TRUE	FALSE	TRUE	FALSE	FALSE	FALSE	FALSE	FALSE	FALSE	TRUE	FALSE	Cytoplasm	2	8	CHEMBL3125702	AMG-232	FALSE	2	FALSE	Reactome	Transcriptional Regulation by TP53	9	0	3	5	0	0	52.83
TP53	ENSG00000141510	tumor protein p53	2433	5	FALSE	TRUE	FALSE	TRUE	FALSE	FALSE	FALSE	FALSE	FALSE	FALSE	TRUE	FALSE	Cytoplasm	2	8	CHEMBL2108280	CENERSEN	FALSE	2	FALSE	Reactome	G2/M DNA damage checkpoint	9	0	3	5	0	0	52.83
TP53	ENSG00000141510	tumor protein p53	2433	5	FALSE	TRUE	FALSE	TRUE	FALSE	FALSE	FALSE	FALSE	FALSE	FALSE	TRUE	FALSE	Cytoplasm	2	8	CHEMBL2108280	CENERSEN	FALSE	2	FALSE	Reactome	Transcriptional Regulation by TP53	9	0	3	5	0	0	52.83
TP53	ENSG00000141510	tumor protein p53	2433	5	FALSE	TRUE	FALSE	TRUE	FALSE	FALSE	FALSE	FALSE	FALSE	FALSE	TRUE	FALSE	Cytoplasm	2	8	CHEMBL3125702	AMG-232	FALSE	2	FALSE	Reactome	Cell Cycle Checkpoints	9	0	3	5	0	0	52.83
TP53	ENSG00000141510	tumor protein p53	2433	5	FALSE	TRUE	FALSE	TRUE	FALSE	FALSE	FALSE	FALSE	FALSE	FALSE	TRUE	FALSE	Cytoplasm	2	8	CHEMBL2108280	CENERSEN	FALSE	2	FALSE	Reactome	Cell Cycle Checkpoints	9	0	3	5	0	0	52.83
TP53	ENSG00000141510	tumor protein p53	2433	5	FALSE	TRUE	FALSE	TRUE	FALSE	FALSE	FALSE	FALSE	FALSE	FALSE	TRUE	FALSE	Cytoplasm	2	8	CHEMBL2402737	IDASANUTLIN	FALSE	3	FALSE	Reactome	Transcriptional Regulation by TP53	9	0	3	5	0	0	52.83
TP53	ENSG00000141510	tumor protein p53	2433	5	FALSE	TRUE	FALSE	TRUE	FALSE	FALSE	FALSE	FALSE	FALSE	FALSE	TRUE	FALSE	Cytoplasm	2	8	CHEMBL2108585	CONTUSUGENE LADENOVEC	FALSE	2	FALSE	Reactome	Transcriptional Regulation by TP53	9	0	3	5	0	0	52.83
TP53	ENSG00000141510	tumor protein p53	2433	5	FALSE	TRUE	FALSE	TRUE	FALSE	FALSE	FALSE	FALSE	FALSE	FALSE	TRUE	FALSE	Cytoplasm	2	8	CHEMBL3186011	EPRENETAPOPT	FALSE	3	FALSE	Reactome	G2/M DNA damage checkpoint	9	0	3	5	0	0	52.83
TP53	ENSG00000141510	tumor protein p53	2433	5	FALSE	TRUE	FALSE	TRUE	FALSE	FALSE	FALSE	FALSE	FALSE	FALSE	TRUE	FALSE	Cytoplasm	2	8	CHEMBL4297574	TEPRASIRAN	FALSE	3	FALSE	Reactome	G2/M DNA damage checkpoint	9	0	3	5	0	0	52.83
TP53	ENSG00000141510	tumor protein p53	2433	5	FALSE	TRUE	FALSE	TRUE	FALSE	FALSE	FALSE	FALSE	FALSE	FALSE	TRUE	FALSE	Cytoplasm	2	8	CHEMBL3125702	AMG-232	FALSE	2	FALSE	Reactome	G2/M DNA damage checkpoint	9	0	3	5	0	0	52.83
TP53	ENSG00000141510	tumor protein p53	2433	5	FALSE	TRUE	FALSE	TRUE	FALSE	FALSE	FALSE	FALSE	FALSE	FALSE	TRUE	FALSE	Cytoplasm	2	8	CHEMBL3186011	EPRENETAPOPT	FALSE	3	FALSE	Reactome	Cell Cycle Checkpoints	9	0	3	5	0	0	52.83
TP53	ENSG00000141510	tumor protein p53	2433	5	FALSE	TRUE	FALSE	TRUE	FALSE	FALSE	FALSE	FALSE	FALSE	FALSE	TRUE	FALSE	Cytoplasm	2	8	CHEMBL3186011	EPRENETAPOPT	FALSE	3	FALSE	Reactome	Transcriptional Regulation by TP53	9	0	3	5	0	0	52.83
TP53	ENSG00000141510	tumor protein p53	2433	5	FALSE	TRUE	FALSE	TRUE	FALSE	FALSE	FALSE	FALSE	FALSE	FALSE	TRUE	FALSE	Cytoplasm	2	8	CHEMBL2219776	CENERSEN SODIUM	FALSE	2	FALSE	Reactome	Transcriptional Regulation by TP53	9	0	3	5	0	0	52.83
TP53	ENSG00000141510	tumor protein p53	2433	5	FALSE	TRUE	FALSE	TRUE	FALSE	FALSE	FALSE	FALSE	FALSE	FALSE	TRUE	FALSE	Cytoplasm	2	8	CHEMBL3186011	EPRENETAPOPT	FALSE	3	FALSE	Reactome	Transcriptional Regulation by TP53	9	0	3	5	0	0	52.83
TP53	ENSG00000141510	tumor protein p53	2433	5	FALSE	TRUE	FALSE	TRUE	FALSE	FALSE	FALSE	FALSE	FALSE	FALSE	TRUE	FALSE	Cytoplasm	2	8	CHEMBL4091801	APG115	FALSE	2	FALSE	Reactome	Cell Cycle Checkpoints	9	0	3	5	0	0	52.83
TP53	ENSG00000141510	tumor protein p53	2433	5	FALSE	TRUE	FALSE	TRUE	FALSE	FALSE	FALSE	FALSE	FALSE	FALSE	TRUE	FALSE	Cytoplasm	2	8	CHEMBL2108585	CONTUSUGENE LADENOVEC	FALSE	2	FALSE	Reactome	Transcriptional Regulation by TP53	9	0	3	5	0	0	52.83
AURKB	ENSG00000178999	aurora kinase B	240	4	FALSE	TRUE	FALSE	TRUE	FALSE	FALSE	FALSE	FALSE	FALSE	FALSE	FALSE	FALSE	Nucleus	1	18	CHEMBL415049	BARASERTIB	FALSE	3	FALSE	Reactome	Resolution of Sister Chromatid Cohesion	9	0	2	6	1	0	50.9
AURKB	ENSG00000178999	aurora kinase B	240	4	FALSE	TRUE	FALSE	TRUE	FALSE	FALSE	FALSE	FALSE	FALSE	FALSE	FALSE	FALSE	Nucleus	1	18	CHEMBL415049	BARASERTIB	FALSE	3	FALSE	Reactome	SUMOylation of DNA replication proteins	9	0	2	6	1	0	50.9
AURKB	ENSG00000178999	aurora kinase B	240	4	FALSE	TRUE	FALSE	TRUE	FALSE	FALSE	FALSE	FALSE	FALSE	FALSE	FALSE	FALSE	Nucleus	1	18	CHEMBL415049	BARASERTIB	FALSE	3	FALSE	Reactome	Resolution of Sister Chromatid Cohesion	9	0	2	6	1	0	50.9
AURKB	ENSG00000178999	aurora kinase B	240	4	FALSE	TRUE	FALSE	TRUE	FALSE	FALSE	FALSE	FALSE	FALSE	FALSE	FALSE	FALSE	Nucleus	1	18	CHEMBL3545428	CHIAURANIB	FALSE	3	FALSE	Reactome	Transcriptional Regulation by TP53	9	0	2	6	1	0	50.9
AURKB	ENSG00000178999	aurora kinase B	240	4	FALSE	TRUE	FALSE	TRUE	FALSE	FALSE	FALSE	FALSE	FALSE	FALSE	FALSE	FALSE	Nucleus	1	18	CHEMBL415049	BARASERTIB	FALSE	3	FALSE	Reactome	Regulation of TP53 Activity	9	0	2	6	1	0	50.9
AURKB	ENSG00000178999	aurora kinase B	240	4	FALSE	TRUE	FALSE	TRUE	FALSE	FALSE	FALSE	FALSE	FALSE	FALSE	FALSE	FALSE	Nucleus	1	18	CHEMBL3545428	CHIAURANIB	FALSE	3	FALSE	Reactome	Regulation of TP53 Activity	9	0	2	6	1	0	50.9
AURKB	ENSG00000178999	aurora kinase B	240	4	FALSE	TRUE	FALSE	TRUE	FALSE	FALSE	FALSE	FALSE	FALSE	FALSE	FALSE	FALSE	Nucleus	1	18	CHEMBL3545428	CHIAURANIB	FALSE	3	FALSE	Reactome	Transcriptional Regulation by TP53	9	0	2	6	1	0	50.9
AURKB	ENSG00000178999	aurora kinase B	240	4	FALSE	TRUE	FALSE	TRUE	FALSE	FALSE	FALSE	FALSE	FALSE	FALSE	FALSE	FALSE	Nucleus	1	18	CHEMBL3545428	CHIAURANIB	FALSE	3	FALSE	Reactome	SUMOylation of DNA replication proteins	9	0	2	6	1	0	50.9
AURKB	ENSG00000178999	aurora kinase B	240	4	FALSE	TRUE	FALSE	TRUE	FALSE	FALSE	FALSE	FALSE	FALSE	FALSE	FALSE	FALSE	Nucleus	1	18	CHEMBL1980297	ILORASERTIB	FALSE	2	FALSE	Reactome	SUMOylation of DNA replication proteins	9	0	2	6	1	0	50.9
AURKB	ENSG00000178999	aurora kinase B	240	4	FALSE	TRUE	FALSE	TRUE	FALSE	FALSE	FALSE	FALSE	FALSE	FALSE	FALSE	FALSE	Nucleus	1	18	CHEMBL482968	ENMD-2076	FALSE	2	FALSE	Reactome	Cell Cycle Checkpoints	9	0	2	6	1	0	50.9
AURKB	ENSG00000178999	aurora kinase B	240	4	FALSE	TRUE	FALSE	TRUE	FALSE	FALSE	FALSE	FALSE	FALSE	FALSE	FALSE	FALSE	Nucleus	1	18	CHEMBL1980297	ILORASERTIB	FALSE	2	FALSE	Reactome	Regulation of TP53 Activity	9	0	2	6	1	0	50.9
AURKB	ENSG00000178999	aurora kinase B	240	4	FALSE	TRUE	FALSE	TRUE	FALSE	FALSE	FALSE	FALSE	FALSE	FALSE	FALSE	FALSE	Nucleus	1	18	CHEMBL415049	BARASERTIB	FALSE	3	FALSE	Reactome	Mitotic Prometaphase	9	0	2	6	1	0	50.9
AURKB	ENSG00000178999	aurora kinase B	240	4	FALSE	TRUE	FALSE	TRUE	FALSE	FALSE	FALSE	FALSE	FALSE	FALSE	FALSE	FALSE	Nucleus	1	18	CHEMBL482968	ENMD-2076	FALSE	2	FALSE	Reactome	Cell Cycle Checkpoints	9	0	2	6	1	0	50.9
AURKB	ENSG00000178999	aurora kinase B	240	4	FALSE	TRUE	FALSE	TRUE	FALSE	FALSE	FALSE	FALSE	FALSE	FALSE	FALSE	FALSE	Nucleus	1	18	CHEMBL572878	TOZASERTIB	FALSE	2	FALSE	Reactome	Regulation of TP53 Activity	9	0	2	6	1	0	50.9
AURKB	ENSG00000178999	aurora kinase B	240	4	FALSE	TRUE	FALSE	TRUE	FALSE	FALSE	FALSE	FALSE	FALSE	FALSE	FALSE	FALSE	Nucleus	1	18	CHEMBL3545428	CHIAURANIB	FALSE	3	FALSE	Reactome	Regulation of TP53 Activity	9	0	2	6	1	0	50.9
AURKB	ENSG00000178999	aurora kinase B	240	4	FALSE	TRUE	FALSE	TRUE	FALSE	FALSE	FALSE	FALSE	FALSE	FALSE	FALSE	FALSE	Nucleus	1	18	CHEMBL3545428	CHIAURANIB	FALSE	3	FALSE	Reactome	Cell Cycle Checkpoints	9	0	2	6	1	0	50.9
AURKB	ENSG00000178999	aurora kinase B	240	4	FALSE	TRUE	FALSE	TRUE	FALSE	FALSE	FALSE	FALSE	FALSE	FALSE	FALSE	FALSE	Nucleus	1	18	CHEMBL3545395	BI-811283	FALSE	2	FALSE	Reactome	SUMOylation of DNA replication proteins	9	0	2	6	1	0	50.9
AURKB	ENSG00000178999	aurora kinase B	240	4	FALSE	TRUE	FALSE	TRUE	FALSE	FALSE	FALSE	FALSE	FALSE	FALSE	FALSE	FALSE	Nucleus	1	18	CHEMBL482967	CYC-116	FALSE	1	FALSE	Reactome	Cell Cycle Checkpoints	9	0	2	6	1	0	50.9
AURKB	ENSG00000178999	aurora kinase B	240	4	FALSE	TRUE	FALSE	TRUE	FALSE	FALSE	FALSE	FALSE	FALSE	FALSE	FALSE	FALSE	Nucleus	1	18	CHEMBL402548	DANUSERTIB	FALSE	2	FALSE	Reactome	Regulation of TP53 Activity	9	0	2	6	1	0	50.9
AURKB	ENSG00000178999	aurora kinase B	240	4	FALSE	TRUE	FALSE	TRUE	FALSE	FALSE	FALSE	FALSE	FALSE	FALSE	FALSE	FALSE	Nucleus	1	18	CHEMBL402548	DANUSERTIB	FALSE	2	FALSE	Reactome	SUMOylation of DNA replication proteins	9	0	2	6	1	0	50.9
AURKB	ENSG00000178999	aurora kinase B	240	4	FALSE	TRUE	FALSE	TRUE	FALSE	FALSE	FALSE	FALSE	FALSE	FALSE	FALSE	FALSE	Nucleus	1	18	CHEMBL402548	DANUSERTIB	FALSE	2	FALSE	Reactome	Transcriptional Regulation by TP53	9	0	2	6	1	0	50.9
AURKB	ENSG00000178999	aurora kinase B	240	4	FALSE	TRUE	FALSE	TRUE	FALSE	FALSE	FALSE	FALSE	FALSE	FALSE	FALSE	FALSE	Nucleus	1	18	CHEMBL415049	BARASERTIB	FALSE	3	FALSE	Reactome	Cell Cycle Checkpoints	9	0	2	6	1	0	50.9
AURKB	ENSG00000178999	aurora kinase B	240	4	FALSE	TRUE	FALSE	TRUE	FALSE	FALSE	FALSE	FALSE	FALSE	FALSE	FALSE	FALSE	Nucleus	1	18	CHEMBL3545428	CHIAURANIB	FALSE	3	FALSE	Reactome	SUMOylation of DNA replication proteins	9	0	2	6	1	0	50.9
AURKB	ENSG00000178999	aurora kinase B	240	4	FALSE	TRUE	FALSE	TRUE	FALSE	FALSE	FALSE	FALSE	FALSE	FALSE	FALSE	FALSE	Nucleus	1	18	CHEMBL572878	TOZASERTIB	FALSE	2	FALSE	Reactome	Resolution of Sister Chromatid Cohesion	9	0	2	6	1	0	50.9
AURKB	ENSG00000178999	aurora kinase B	240	4	FALSE	TRUE	FALSE	TRUE	FALSE	FALSE	FALSE	FALSE	FALSE	FALSE	FALSE	FALSE	Nucleus	1	18	CHEMBL482968	ENMD-2076	FALSE	2	FALSE	Reactome	Regulation of TP53 Activity	9	0	2	6	1	0	50.9
AURKB	ENSG00000178999	aurora kinase B	240	4	FALSE	TRUE	FALSE	TRUE	FALSE	FALSE	FALSE	FALSE	FALSE	FALSE	FALSE	FALSE	Nucleus	1	18	CHEMBL402548	DANUSERTIB	FALSE	2	FALSE	Reactome	Regulation of TP53 Activity	9	0	2	6	1	0	50.9
AURKB	ENSG00000178999	aurora kinase B	240	4	FALSE	TRUE	FALSE	TRUE	FALSE	FALSE	FALSE	FALSE	FALSE	FALSE	FALSE	FALSE	Nucleus	1	18	CHEMBL3545428	CHIAURANIB	FALSE	3	FALSE	Reactome	SUMOylation of DNA replication proteins	9	0	2	6	1	0	50.9
AURKB	ENSG00000178999	aurora kinase B	240	4	FALSE	TRUE	FALSE	TRUE	FALSE	FALSE	FALSE	FALSE	FALSE	FALSE	FALSE	FALSE	Nucleus	1	18	CHEMBL572878	TOZASERTIB	FALSE	2	FALSE	Reactome	Regulation of TP53 Activity	9	0	2	6	1	0	50.9
AURKB	ENSG00000178999	aurora kinase B	240	4	FALSE	TRUE	FALSE	TRUE	FALSE	FALSE	FALSE	FALSE	FALSE	FALSE	FALSE	FALSE	Nucleus	1	18	CHEMBL402548	DANUSERTIB	FALSE	2	FALSE	Reactome	SUMO E3 ligases SUMOylate target proteins	9	0	2	6	1	0	50.9
AURKB	ENSG00000178999	aurora kinase B	240	4	FALSE	TRUE	FALSE	TRUE	FALSE	FALSE	FALSE	FALSE	FALSE	FALSE	FALSE	FALSE	Nucleus	1	18	CHEMBL495727	AT-9283	FALSE	2	FALSE	Reactome	Resolution of Sister Chromatid Cohesion	9	0	2	6	1	0	50.9
AURKB	ENSG00000178999	aurora kinase B	240	4	FALSE	TRUE	FALSE	TRUE	FALSE	FALSE	FALSE	FALSE	FALSE	FALSE	FALSE	FALSE	Nucleus	1	18	CHEMBL3545428	CHIAURANIB	FALSE	3	FALSE	Reactome	Regulation of TP53 Activity	9	0	2	6	1	0	50.9
AURKB	ENSG00000178999	aurora kinase B	240	4	FALSE	TRUE	FALSE	TRUE	FALSE	FALSE	FALSE	FALSE	FALSE	FALSE	FALSE	FALSE	Nucleus	1	18	CHEMBL482968	ENMD-2076	FALSE	2	FALSE	Reactome	Mitotic Prometaphase	9	0	2	6	1	0	50.9
AURKB	ENSG00000178999	aurora kinase B	240	4	FALSE	TRUE	FALSE	TRUE	FALSE	FALSE	FALSE	FALSE	FALSE	FALSE	FALSE	FALSE	Nucleus	1	18	CHEMBL1980297	ILORASERTIB	FALSE	2	FALSE	Reactome	Mitotic Prometaphase	9	0	2	6	1	0	50.9
AURKB	ENSG00000178999	aurora kinase B	240	4	FALSE	TRUE	FALSE	TRUE	FALSE	FALSE	FALSE	FALSE	FALSE	FALSE	FALSE	FALSE	Nucleus	1	18	CHEMBL482967	CYC-116	FALSE	1	FALSE	Reactome	Mitotic Prometaphase	9	0	2	6	1	0	50.9
AURKB	ENSG00000178999	aurora kinase B	240	4	FALSE	TRUE	FALSE	TRUE	FALSE	FALSE	FALSE	FALSE	FALSE	FALSE	FALSE	FALSE	Nucleus	1	18	CHEMBL572878	TOZASERTIB	FALSE	2	FALSE	Reactome	Cell Cycle Checkpoints	9	0	2	6	1	0	50.9
AURKB	ENSG00000178999	aurora kinase B	240	4	FALSE	TRUE	FALSE	TRUE	FALSE	FALSE	FALSE	FALSE	FALSE	FALSE	FALSE	FALSE	Nucleus	1	18	CHEMBL572878	TOZASERTIB	FALSE	2	FALSE	Reactome	Cell Cycle Checkpoints	9	0	2	6	1	0	50.9
AURKB	ENSG00000178999	aurora kinase B	240	4	FALSE	TRUE	FALSE	TRUE	FALSE	FALSE	FALSE	FALSE	FALSE	FALSE	FALSE	FALSE	Nucleus	1	18	CHEMBL415049	BARASERTIB	FALSE	3	FALSE	Reactome	Cell Cycle Checkpoints	9	0	2	6	1	0	50.9
AURKB	ENSG00000178999	aurora kinase B	240	4	FALSE	TRUE	FALSE	TRUE	FALSE	FALSE	FALSE	FALSE	FALSE	FALSE	FALSE	FALSE	Nucleus	1	18	CHEMBL3545428	CHIAURANIB	FALSE	3	FALSE	Reactome	Transcriptional Regulation by TP53	9	0	2	6	1	0	50.9
AURKB	ENSG00000178999	aurora kinase B	240	4	FALSE	TRUE	FALSE	TRUE	FALSE	FALSE	FALSE	FALSE	FALSE	FALSE	FALSE	FALSE	Nucleus	1	18	CHEMBL3545428	CHIAURANIB	FALSE	3	FALSE	Reactome	Transcriptional Regulation by TP53	9	0	2	6	1	0	50.9
AURKB	ENSG00000178999	aurora kinase B	240	4	FALSE	TRUE	FALSE	TRUE	FALSE	FALSE	FALSE	FALSE	FALSE	FALSE	FALSE	FALSE	Nucleus	1	18	CHEMBL572878	TOZASERTIB	FALSE	2	FALSE	Reactome	SUMOylation of DNA replication proteins	9	0	2	6	1	0	50.9
AURKB	ENSG00000178999	aurora kinase B	240	4	FALSE	TRUE	FALSE	TRUE	FALSE	FALSE	FALSE	FALSE	FALSE	FALSE	FALSE	FALSE	Nucleus	1	18	CHEMBL482968	ENMD-2076	FALSE	2	FALSE	Reactome	Resolution of Sister Chromatid Cohesion	9	0	2	6	1	0	50.9
AURKB	ENSG00000178999	aurora kinase B	240	4	FALSE	TRUE	FALSE	TRUE	FALSE	FALSE	FALSE	FALSE	FALSE	FALSE	FALSE	FALSE	Nucleus	1	18	CHEMBL482968	ENMD-2076	FALSE	2	FALSE	Reactome	Transcriptional Regulation by TP53	9	0	2	6	1	0	50.9
AURKB	ENSG00000178999	aurora kinase B	240	4	FALSE	TRUE	FALSE	TRUE	FALSE	FALSE	FALSE	FALSE	FALSE	FALSE	FALSE	FALSE	Nucleus	1	18	CHEMBL482968	ENMD-2076	FALSE	2	FALSE	Reactome	Mitotic Prometaphase	9	0	2	6	1	0	50.9
AURKB	ENSG00000178999	aurora kinase B	240	4	FALSE	TRUE	FALSE	TRUE	FALSE	FALSE	FALSE	FALSE	FALSE	FALSE	FALSE	FALSE	Nucleus	1	18	CHEMBL402548	DANUSERTIB	FALSE	2	FALSE	Reactome	Cell Cycle Checkpoints	9	0	2	6	1	0	50.9
AURKB	ENSG00000178999	aurora kinase B	240	4	FALSE	TRUE	FALSE	TRUE	FALSE	FALSE	FALSE	FALSE	FALSE	FALSE	FALSE	FALSE	Nucleus	1	18	CHEMBL495727	AT-9283	FALSE	2	FALSE	Reactome	Transcriptional Regulation by TP53	9	0	2	6	1	0	50.9
AURKB	ENSG00000178999	aurora kinase B	240	4	FALSE	TRUE	FALSE	TRUE	FALSE	FALSE	FALSE	FALSE	FALSE	FALSE	FALSE	FALSE	Nucleus	1	18	CHEMBL572878	TOZASERTIB	FALSE	2	FALSE	Reactome	Cell Cycle Checkpoints	9	0	2	6	1	0	50.9
AURKB	ENSG00000178999	aurora kinase B	240	4	FALSE	TRUE	FALSE	TRUE	FALSE	FALSE	FALSE	FALSE	FALSE	FALSE	FALSE	FALSE	Nucleus	1	18	CHEMBL415049	BARASERTIB	FALSE	3	FALSE	Reactome	Cell Cycle Checkpoints	9	0	2	6	1	0	50.9
AURKB	ENSG00000178999	aurora kinase B	240	4	FALSE	TRUE	FALSE	TRUE	FALSE	FALSE	FALSE	FALSE	FALSE	FALSE	FALSE	FALSE	Nucleus	1	18	CHEMBL415049	BARASERTIB	FALSE	3	FALSE	Reactome	Mitotic Prometaphase	9	0	2	6	1	0	50.9
AURKB	ENSG00000178999	aurora kinase B	240	4	FALSE	TRUE	FALSE	TRUE	FALSE	FALSE	FALSE	FALSE	FALSE	FALSE	FALSE	FALSE	Nucleus	1	18	CHEMBL482968	ENMD-2076	FALSE	2	FALSE	Reactome	Cell Cycle Checkpoints	9	0	2	6	1	0	50.9
AURKB	ENSG00000178999	aurora kinase B	240	4	FALSE	TRUE	FALSE	TRUE	FALSE	FALSE	FALSE	FALSE	FALSE	FALSE	FALSE	FALSE	Nucleus	1	18	CHEMBL482968	ENMD-2076	FALSE	2	FALSE	Reactome	Cell Cycle Checkpoints	9	0	2	6	1	0	50.9
AURKB	ENSG00000178999	aurora kinase B	240	4	FALSE	TRUE	FALSE	TRUE	FALSE	FALSE	FALSE	FALSE	FALSE	FALSE	FALSE	FALSE	Nucleus	1	18	CHEMBL572878	TOZASERTIB	FALSE	2	FALSE	Reactome	Regulation of TP53 Activity	9	0	2	6	1	0	50.9
AURKB	ENSG00000178999	aurora kinase B	240	4	FALSE	TRUE	FALSE	TRUE	FALSE	FALSE	FALSE	FALSE	FALSE	FALSE	FALSE	FALSE	Nucleus	1	18	CHEMBL3545428	CHIAURANIB	FALSE	3	FALSE	Reactome	Resolution of Sister Chromatid Cohesion	9	0	2	6	1	0	50.9
AURKB	ENSG00000178999	aurora kinase B	240	4	FALSE	TRUE	FALSE	TRUE	FALSE	FALSE	FALSE	FALSE	FALSE	FALSE	FALSE	FALSE	Nucleus	1	18	CHEMBL482967	CYC-116	FALSE	1	FALSE	Reactome	Resolution of Sister Chromatid Cohesion	9	0	2	6	1	0	50.9
AURKB	ENSG00000178999	aurora kinase B	240	4	FALSE	TRUE	FALSE	TRUE	FALSE	FALSE	FALSE	FALSE	FALSE	FALSE	FALSE	FALSE	Nucleus	1	18	CHEMBL415049	BARASERTIB	FALSE	3	FALSE	Reactome	Regulation of TP53 Activity	9	0	2	6	1	0	50.9
AURKB	ENSG00000178999	aurora kinase B	240	4	FALSE	TRUE	FALSE	TRUE	FALSE	FALSE	FALSE	FALSE	FALSE	FALSE	FALSE	FALSE	Nucleus	1	18	CHEMBL482968	ENMD-2076	FALSE	2	FALSE	Reactome	Resolution of Sister Chromatid Cohesion	9	0	2	6	1	0	50.9
AURKB	ENSG00000178999	aurora kinase B	240	4	FALSE	TRUE	FALSE	TRUE	FALSE	FALSE	FALSE	FALSE	FALSE	FALSE	FALSE	FALSE	Nucleus	1	18	CHEMBL415049	BARASERTIB	FALSE	3	FALSE	Reactome	Transcriptional Regulation by TP53	9	0	2	6	1	0	50.9
AURKB	ENSG00000178999	aurora kinase B	240	4	FALSE	TRUE	FALSE	TRUE	FALSE	FALSE	FALSE	FALSE	FALSE	FALSE	FALSE	FALSE	Nucleus	1	18	CHEMBL572878	TOZASERTIB	FALSE	2	FALSE	Reactome	SUMOylation	9	0	2	6	1	0	50.9
AURKB	ENSG00000178999	aurora kinase B	240	4	FALSE	TRUE	FALSE	TRUE	FALSE	FALSE	FALSE	FALSE	FALSE	FALSE	FALSE	FALSE	Nucleus	1	18	CHEMBL482968	ENMD-2076	FALSE	2	FALSE	Reactome	SUMOylation of DNA replication proteins	9	0	2	6	1	0	50.9
AURKB	ENSG00000178999	aurora kinase B	240	4	FALSE	TRUE	FALSE	TRUE	FALSE	FALSE	FALSE	FALSE	FALSE	FALSE	FALSE	FALSE	Nucleus	1	18	CHEMBL482967	CYC-116	FALSE	1	FALSE	Reactome	SUMOylation	9	0	2	6	1	0	50.9
AURKB	ENSG00000178999	aurora kinase B	240	4	FALSE	TRUE	FALSE	TRUE	FALSE	FALSE	FALSE	FALSE	FALSE	FALSE	FALSE	FALSE	Nucleus	1	18	CHEMBL415049	BARASERTIB	FALSE	3	FALSE	Reactome	SUMOylation	9	0	2	6	1	0	50.9
AURKB	ENSG00000178999	aurora kinase B	240	4	FALSE	TRUE	FALSE	TRUE	FALSE	FALSE	FALSE	FALSE	FALSE	FALSE	FALSE	FALSE	Nucleus	1	18	CHEMBL402548	DANUSERTIB	FALSE	2	FALSE	Reactome	Cell Cycle Checkpoints	9	0	2	6	1	0	50.9
AURKB	ENSG00000178999	aurora kinase B	240	4	FALSE	TRUE	FALSE	TRUE	FALSE	FALSE	FALSE	FALSE	FALSE	FALSE	FALSE	FALSE	Nucleus	1	18	CHEMBL482968	ENMD-2076	FALSE	2	FALSE	Reactome	Regulation of TP53 Activity	9	0	2	6	1	0	50.9
AURKB	ENSG00000178999	aurora kinase B	240	4	FALSE	TRUE	FALSE	TRUE	FALSE	FALSE	FALSE	FALSE	FALSE	FALSE	FALSE	FALSE	Nucleus	1	18	CHEMBL482968	ENMD-2076	FALSE	2	FALSE	Reactome	Cell Cycle Checkpoints	9	0	2	6	1	0	50.9
AURKB	ENSG00000178999	aurora kinase B	240	4	FALSE	TRUE	FALSE	TRUE	FALSE	FALSE	FALSE	FALSE	FALSE	FALSE	FALSE	FALSE	Nucleus	1	18	CHEMBL482968	ENMD-2076	FALSE	2	FALSE	Reactome	Regulation of TP53 Activity	9	0	2	6	1	0	50.9
AURKB	ENSG00000178999	aurora kinase B	240	4	FALSE	TRUE	FALSE	TRUE	FALSE	FALSE	FALSE	FALSE	FALSE	FALSE	FALSE	FALSE	Nucleus	1	18	CHEMBL3545428	CHIAURANIB	FALSE	3	FALSE	Reactome	SUMO E3 ligases SUMOylate target proteins	9	0	2	6	1	0	50.9
AURKB	ENSG00000178999	aurora kinase B	240	4	FALSE	TRUE	FALSE	TRUE	FALSE	FALSE	FALSE	FALSE	FALSE	FALSE	FALSE	FALSE	Nucleus	1	18	CHEMBL3545428	CHIAURANIB	FALSE	3	FALSE	Reactome	SUMO E3 ligases SUMOylate target proteins	9	0	2	6	1	0	50.9
AURKB	ENSG00000178999	aurora kinase B	240	4	FALSE	TRUE	FALSE	TRUE	FALSE	FALSE	FALSE	FALSE	FALSE	FALSE	FALSE	FALSE	Nucleus	1	18	CHEMBL482968	ENMD-2076	FALSE	2	FALSE	Reactome	SUMOylation	9	0	2	6	1	0	50.9
AURKB	ENSG00000178999	aurora kinase B	240	4	FALSE	TRUE	FALSE	TRUE	FALSE	FALSE	FALSE	FALSE	FALSE	FALSE	FALSE	FALSE	Nucleus	1	18	CHEMBL482968	ENMD-2076	FALSE	2	FALSE	Reactome	Cell Cycle Checkpoints	9	0	2	6	1	0	50.9
AURKB	ENSG00000178999	aurora kinase B	240	4	FALSE	TRUE	FALSE	TRUE	FALSE	FALSE	FALSE	FALSE	FALSE	FALSE	FALSE	FALSE	Nucleus	1	18	CHEMBL402548	DANUSERTIB	FALSE	2	FALSE	Reactome	Resolution of Sister Chromatid Cohesion	9	0	2	6	1	0	50.9
AURKB	ENSG00000178999	aurora kinase B	240	4	FALSE	TRUE	FALSE	TRUE	FALSE	FALSE	FALSE	FALSE	FALSE	FALSE	FALSE	FALSE	Nucleus	1	18	CHEMBL1980297	ILORASERTIB	FALSE	2	FALSE	Reactome	Cell Cycle Checkpoints	9	0	2	6	1	0	50.9
AURKB	ENSG00000178999	aurora kinase B	240	4	FALSE	TRUE	FALSE	TRUE	FALSE	FALSE	FALSE	FALSE	FALSE	FALSE	FALSE	FALSE	Nucleus	1	18	CHEMBL495727	AT-9283	FALSE	2	FALSE	Reactome	Cell Cycle Checkpoints	9	0	2	6	1	0	50.9
AURKB	ENSG00000178999	aurora kinase B	240	4	FALSE	TRUE	FALSE	TRUE	FALSE	FALSE	FALSE	FALSE	FALSE	FALSE	FALSE	FALSE	Nucleus	1	18	CHEMBL3545428	CHIAURANIB	FALSE	3	FALSE	Reactome	Cell Cycle Checkpoints	9	0	2	6	1	0	50.9
AURKB	ENSG00000178999	aurora kinase B	240	4	FALSE	TRUE	FALSE	TRUE	FALSE	FALSE	FALSE	FALSE	FALSE	FALSE	FALSE	FALSE	Nucleus	1	18	CHEMBL3545395	BI-811283	FALSE	2	FALSE	Reactome	Cell Cycle Checkpoints	9	0	2	6	1	0	50.9
AURKB	ENSG00000178999	aurora kinase B	240	4	FALSE	TRUE	FALSE	TRUE	FALSE	FALSE	FALSE	FALSE	FALSE	FALSE	FALSE	FALSE	Nucleus	1	18	CHEMBL3545428	CHIAURANIB	FALSE	3	FALSE	Reactome	SUMO E3 ligases SUMOylate target proteins	9	0	2	6	1	0	50.9
AURKB	ENSG00000178999	aurora kinase B	240	4	FALSE	TRUE	FALSE	TRUE	FALSE	FALSE	FALSE	FALSE	FALSE	FALSE	FALSE	FALSE	Nucleus	1	18	CHEMBL402548	DANUSERTIB	FALSE	2	FALSE	Reactome	SUMOylation of DNA replication proteins	9	0	2	6	1	0	50.9
AURKB	ENSG00000178999	aurora kinase B	240	4	FALSE	TRUE	FALSE	TRUE	FALSE	FALSE	FALSE	FALSE	FALSE	FALSE	FALSE	FALSE	Nucleus	1	18	CHEMBL3545428	CHIAURANIB	FALSE	3	FALSE	Reactome	SUMOylation of DNA replication proteins	9	0	2	6	1	0	50.9
AURKB	ENSG00000178999	aurora kinase B	240	4	FALSE	TRUE	FALSE	TRUE	FALSE	FALSE	FALSE	FALSE	FALSE	FALSE	FALSE	FALSE	Nucleus	1	18	CHEMBL3545428	CHIAURANIB	FALSE	3	FALSE	Reactome	Cell Cycle Checkpoints	9	0	2	6	1	0	50.9
AURKB	ENSG00000178999	aurora kinase B	240	4	FALSE	TRUE	FALSE	TRUE	FALSE	FALSE	FALSE	FALSE	FALSE	FALSE	FALSE	FALSE	Nucleus	1	18	CHEMBL3545428	CHIAURANIB	FALSE	3	FALSE	Reactome	Regulation of TP53 Activity	9	0	2	6	1	0	50.9
AURKB	ENSG00000178999	aurora kinase B	240	4	FALSE	TRUE	FALSE	TRUE	FALSE	FALSE	FALSE	FALSE	FALSE	FALSE	FALSE	FALSE	Nucleus	1	18	CHEMBL1980297	ILORASERTIB	FALSE	2	FALSE	Reactome	Resolution of Sister Chromatid Cohesion	9	0	2	6	1	0	50.9
AURKB	ENSG00000178999	aurora kinase B	240	4	FALSE	TRUE	FALSE	TRUE	FALSE	FALSE	FALSE	FALSE	FALSE	FALSE	FALSE	FALSE	Nucleus	1	18	CHEMBL3545428	CHIAURANIB	FALSE	3	FALSE	Reactome	SUMOylation of DNA replication proteins	9	0	2	6	1	0	50.9
AURKB	ENSG00000178999	aurora kinase B	240	4	FALSE	TRUE	FALSE	TRUE	FALSE	FALSE	FALSE	FALSE	FALSE	FALSE	FALSE	FALSE	Nucleus	1	18	CHEMBL415049	BARASERTIB	FALSE	3	FALSE	Reactome	SUMOylation	9	0	2	6	1	0	50.9
AURKB	ENSG00000178999	aurora kinase B	240	4	FALSE	TRUE	FALSE	TRUE	FALSE	FALSE	FALSE	FALSE	FALSE	FALSE	FALSE	FALSE	Nucleus	1	18	CHEMBL482968	ENMD-2076	FALSE	2	FALSE	Reactome	Mitotic Prometaphase	9	0	2	6	1	0	50.9
AURKB	ENSG00000178999	aurora kinase B	240	4	FALSE	TRUE	FALSE	TRUE	FALSE	FALSE	FALSE	FALSE	FALSE	FALSE	FALSE	FALSE	Nucleus	1	18	CHEMBL572878	TOZASERTIB	FALSE	2	FALSE	Reactome	Mitotic Prometaphase	9	0	2	6	1	0	50.9
AURKB	ENSG00000178999	aurora kinase B	240	4	FALSE	TRUE	FALSE	TRUE	FALSE	FALSE	FALSE	FALSE	FALSE	FALSE	FALSE	FALSE	Nucleus	1	18	CHEMBL482968	ENMD-2076	FALSE	2	FALSE	Reactome	APC/C:Cdh1 mediated degradation of Cdc20 and other APC/C:Cdh1 targeted proteins in late mitosis/early G1	9	0	2	6	1	0	50.9
AURKB	ENSG00000178999	aurora kinase B	240	4	FALSE	TRUE	FALSE	TRUE	FALSE	FALSE	FALSE	FALSE	FALSE	FALSE	FALSE	FALSE	Nucleus	1	18	CHEMBL482968	ENMD-2076	FALSE	2	FALSE	Reactome	Regulation of TP53 Activity	9	0	2	6	1	0	50.9
AURKB	ENSG00000178999	aurora kinase B	240	4	FALSE	TRUE	FALSE	TRUE	FALSE	FALSE	FALSE	FALSE	FALSE	FALSE	FALSE	FALSE	Nucleus	1	18	CHEMBL482968	ENMD-2076	FALSE	2	FALSE	Reactome	SUMO E3 ligases SUMOylate target proteins	9	0	2	6	1	0	50.9
AURKB	ENSG00000178999	aurora kinase B	240	4	FALSE	TRUE	FALSE	TRUE	FALSE	FALSE	FALSE	FALSE	FALSE	FALSE	FALSE	FALSE	Nucleus	1	18	CHEMBL415049	BARASERTIB	FALSE	3	FALSE	Reactome	SUMOylation of DNA replication proteins	9	0	2	6	1	0	50.9
AURKB	ENSG00000178999	aurora kinase B	240	4	FALSE	TRUE	FALSE	TRUE	FALSE	FALSE	FALSE	FALSE	FALSE	FALSE	FALSE	FALSE	Nucleus	1	18	CHEMBL402548	DANUSERTIB	FALSE	2	FALSE	Reactome	Mitotic Prometaphase	9	0	2	6	1	0	50.9
AURKB	ENSG00000178999	aurora kinase B	240	4	FALSE	TRUE	FALSE	TRUE	FALSE	FALSE	FALSE	FALSE	FALSE	FALSE	FALSE	FALSE	Nucleus	1	18	CHEMBL402548	DANUSERTIB	FALSE	2	FALSE	Reactome	Cell Cycle Checkpoints	9	0	2	6	1	0	50.9
AURKB	ENSG00000178999	aurora kinase B	240	4	FALSE	TRUE	FALSE	TRUE	FALSE	FALSE	FALSE	FALSE	FALSE	FALSE	FALSE	FALSE	Nucleus	1	18	CHEMBL3545428	CHIAURANIB	FALSE	3	FALSE	Reactome	SUMO E3 ligases SUMOylate target proteins	9	0	2	6	1	0	50.9
AURKB	ENSG00000178999	aurora kinase B	240	4	FALSE	TRUE	FALSE	TRUE	FALSE	FALSE	FALSE	FALSE	FALSE	FALSE	FALSE	FALSE	Nucleus	1	18	CHEMBL3545428	CHIAURANIB	FALSE	3	FALSE	Reactome	Regulation of TP53 Activity	9	0	2	6	1	0	50.9
AURKB	ENSG00000178999	aurora kinase B	240	4	FALSE	TRUE	FALSE	TRUE	FALSE	FALSE	FALSE	FALSE	FALSE	FALSE	FALSE	FALSE	Nucleus	1	18	CHEMBL482968	ENMD-2076	FALSE	2	FALSE	Reactome	Transcriptional Regulation by TP53	9	0	2	6	1	0	50.9
AURKB	ENSG00000178999	aurora kinase B	240	4	FALSE	TRUE	FALSE	TRUE	FALSE	FALSE	FALSE	FALSE	FALSE	FALSE	FALSE	FALSE	Nucleus	1	18	CHEMBL3545428	CHIAURANIB	FALSE	3	FALSE	Reactome	Resolution of Sister Chromatid Cohesion	9	0	2	6	1	0	50.9
AURKB	ENSG00000178999	aurora kinase B	240	4	FALSE	TRUE	FALSE	TRUE	FALSE	FALSE	FALSE	FALSE	FALSE	FALSE	FALSE	FALSE	Nucleus	1	18	CHEMBL572878	TOZASERTIB	FALSE	2	FALSE	Reactome	Resolution of Sister Chromatid Cohesion	9	0	2	6	1	0	50.9
AURKB	ENSG00000178999	aurora kinase B	240	4	FALSE	TRUE	FALSE	TRUE	FALSE	FALSE	FALSE	FALSE	FALSE	FALSE	FALSE	FALSE	Nucleus	1	18	CHEMBL482968	ENMD-2076	FALSE	2	FALSE	Reactome	Resolution of Sister Chromatid Cohesion	9	0	2	6	1	0	50.9
AURKB	ENSG00000178999	aurora kinase B	240	4	FALSE	TRUE	FALSE	TRUE	FALSE	FALSE	FALSE	FALSE	FALSE	FALSE	FALSE	FALSE	Nucleus	1	18	CHEMBL482968	ENMD-2076	FALSE	2	FALSE	Reactome	Regulation of TP53 Activity	9	0	2	6	1	0	50.9
AURKB	ENSG00000178999	aurora kinase B	240	4	FALSE	TRUE	FALSE	TRUE	FALSE	FALSE	FALSE	FALSE	FALSE	FALSE	FALSE	FALSE	Nucleus	1	18	CHEMBL3545428	CHIAURANIB	FALSE	3	FALSE	Reactome	SUMOylation	9	0	2	6	1	0	50.9
AURKB	ENSG00000178999	aurora kinase B	240	4	FALSE	TRUE	FALSE	TRUE	FALSE	FALSE	FALSE	FALSE	FALSE	FALSE	FALSE	FALSE	Nucleus	1	18	CHEMBL415049	BARASERTIB	FALSE	3	FALSE	Reactome	SUMOylation	9	0	2	6	1	0	50.9
AURKB	ENSG00000178999	aurora kinase B	240	4	FALSE	TRUE	FALSE	TRUE	FALSE	FALSE	FALSE	FALSE	FALSE	FALSE	FALSE	FALSE	Nucleus	1	18	CHEMBL482968	ENMD-2076	FALSE	2	FALSE	Reactome	SUMOylation of DNA replication proteins	9	0	2	6	1	0	50.9
AURKB	ENSG00000178999	aurora kinase B	240	4	FALSE	TRUE	FALSE	TRUE	FALSE	FALSE	FALSE	FALSE	FALSE	FALSE	FALSE	FALSE	Nucleus	1	18	CHEMBL482968	ENMD-2076	FALSE	2	FALSE	Reactome	SUMO E3 ligases SUMOylate target proteins	9	0	2	6	1	0	50.9
AURKB	ENSG00000178999	aurora kinase B	240	4	FALSE	TRUE	FALSE	TRUE	FALSE	FALSE	FALSE	FALSE	FALSE	FALSE	FALSE	FALSE	Nucleus	1	18	CHEMBL3545428	CHIAURANIB	FALSE	3	FALSE	Reactome	APC/C:Cdh1 mediated degradation of Cdc20 and other APC/C:Cdh1 targeted proteins in late mitosis/early G1	9	0	2	6	1	0	50.9
AURKB	ENSG00000178999	aurora kinase B	240	4	FALSE	TRUE	FALSE	TRUE	FALSE	FALSE	FALSE	FALSE	FALSE	FALSE	FALSE	FALSE	Nucleus	1	18	CHEMBL3545428	CHIAURANIB	FALSE	3	FALSE	Reactome	Resolution of Sister Chromatid Cohesion	9	0	2	6	1	0	50.9
AURKB	ENSG00000178999	aurora kinase B	240	4	FALSE	TRUE	FALSE	TRUE	FALSE	FALSE	FALSE	FALSE	FALSE	FALSE	FALSE	FALSE	Nucleus	1	18	CHEMBL495727	AT-9283	FALSE	2	FALSE	Reactome	Regulation of TP53 Activity	9	0	2	6	1	0	50.9
AURKB	ENSG00000178999	aurora kinase B	240	4	FALSE	TRUE	FALSE	TRUE	FALSE	FALSE	FALSE	FALSE	FALSE	FALSE	FALSE	FALSE	Nucleus	1	18	CHEMBL495727	AT-9283	FALSE	2	FALSE	Reactome	SUMOylation of DNA replication proteins	9	0	2	6	1	0	50.9
AURKB	ENSG00000178999	aurora kinase B	240	4	FALSE	TRUE	FALSE	TRUE	FALSE	FALSE	FALSE	FALSE	FALSE	FALSE	FALSE	FALSE	Nucleus	1	18	CHEMBL482967	CYC-116	FALSE	1	FALSE	Reactome	Regulation of TP53 Activity	9	0	2	6	1	0	50.9
AURKB	ENSG00000178999	aurora kinase B	240	4	FALSE	TRUE	FALSE	TRUE	FALSE	FALSE	FALSE	FALSE	FALSE	FALSE	FALSE	FALSE	Nucleus	1	18	CHEMBL402548	DANUSERTIB	FALSE	2	FALSE	Reactome	Regulation of TP53 Activity	9	0	2	6	1	0	50.9
AURKB	ENSG00000178999	aurora kinase B	240	4	FALSE	TRUE	FALSE	TRUE	FALSE	FALSE	FALSE	FALSE	FALSE	FALSE	FALSE	FALSE	Nucleus	1	18	CHEMBL482968	ENMD-2076	FALSE	2	FALSE	Reactome	Transcriptional Regulation by TP53	9	0	2	6	1	0	50.9
AURKB	ENSG00000178999	aurora kinase B	240	4	FALSE	TRUE	FALSE	TRUE	FALSE	FALSE	FALSE	FALSE	FALSE	FALSE	FALSE	FALSE	Nucleus	1	18	CHEMBL482967	CYC-116	FALSE	1	FALSE	Reactome	SUMOylation of DNA replication proteins	9	0	2	6	1	0	50.9
AURKB	ENSG00000178999	aurora kinase B	240	4	FALSE	TRUE	FALSE	TRUE	FALSE	FALSE	FALSE	FALSE	FALSE	FALSE	FALSE	FALSE	Nucleus	1	18	CHEMBL402548	DANUSERTIB	FALSE	2	FALSE	Reactome	Resolution of Sister Chromatid Cohesion	9	0	2	6	1	0	50.9
AURKB	ENSG00000178999	aurora kinase B	240	4	FALSE	TRUE	FALSE	TRUE	FALSE	FALSE	FALSE	FALSE	FALSE	FALSE	FALSE	FALSE	Nucleus	1	18	CHEMBL482968	ENMD-2076	FALSE	2	FALSE	Reactome	Cell Cycle Checkpoints	9	0	2	6	1	0	50.9
AURKB	ENSG00000178999	aurora kinase B	240	4	FALSE	TRUE	FALSE	TRUE	FALSE	FALSE	FALSE	FALSE	FALSE	FALSE	FALSE	FALSE	Nucleus	1	18	CHEMBL3545428	CHIAURANIB	FALSE	3	FALSE	Reactome	APC/C:Cdh1 mediated degradation of Cdc20 and other APC/C:Cdh1 targeted proteins in late mitosis/early G1	9	0	2	6	1	0	50.9
AURKB	ENSG00000178999	aurora kinase B	240	4	FALSE	TRUE	FALSE	TRUE	FALSE	FALSE	FALSE	FALSE	FALSE	FALSE	FALSE	FALSE	Nucleus	1	18	CHEMBL3545428	CHIAURANIB	FALSE	3	FALSE	Reactome	Cell Cycle Checkpoints	9	0	2	6	1	0	50.9
AURKB	ENSG00000178999	aurora kinase B	240	4	FALSE	TRUE	FALSE	TRUE	FALSE	FALSE	FALSE	FALSE	FALSE	FALSE	FALSE	FALSE	Nucleus	1	18	CHEMBL3545428	CHIAURANIB	FALSE	3	FALSE	Reactome	Mitotic Prometaphase	9	0	2	6	1	0	50.9
AURKB	ENSG00000178999	aurora kinase B	240	4	FALSE	TRUE	FALSE	TRUE	FALSE	FALSE	FALSE	FALSE	FALSE	FALSE	FALSE	FALSE	Nucleus	1	18	CHEMBL402548	DANUSERTIB	FALSE	2	FALSE	Reactome	Transcriptional Regulation by TP53	9	0	2	6	1	0	50.9
AURKB	ENSG00000178999	aurora kinase B	240	4	FALSE	TRUE	FALSE	TRUE	FALSE	FALSE	FALSE	FALSE	FALSE	FALSE	FALSE	FALSE	Nucleus	1	18	CHEMBL482968	ENMD-2076	FALSE	2	FALSE	Reactome	SUMOylation of DNA replication proteins	9	0	2	6	1	0	50.9
AURKB	ENSG00000178999	aurora kinase B	240	4	FALSE	TRUE	FALSE	TRUE	FALSE	FALSE	FALSE	FALSE	FALSE	FALSE	FALSE	FALSE	Nucleus	1	18	CHEMBL3545395	BI-811283	FALSE	2	FALSE	Reactome	SUMO E3 ligases SUMOylate target proteins	9	0	2	6	1	0	50.9
AURKB	ENSG00000178999	aurora kinase B	240	4	FALSE	TRUE	FALSE	TRUE	FALSE	FALSE	FALSE	FALSE	FALSE	FALSE	FALSE	FALSE	Nucleus	1	18	CHEMBL572878	TOZASERTIB	FALSE	2	FALSE	Reactome	SUMO E3 ligases SUMOylate target proteins	9	0	2	6	1	0	50.9
AURKB	ENSG00000178999	aurora kinase B	240	4	FALSE	TRUE	FALSE	TRUE	FALSE	FALSE	FALSE	FALSE	FALSE	FALSE	FALSE	FALSE	Nucleus	1	18	CHEMBL482968	ENMD-2076	FALSE	2	FALSE	Reactome	Transcriptional Regulation by TP53	9	0	2	6	1	0	50.9
AURKB	ENSG00000178999	aurora kinase B	240	4	FALSE	TRUE	FALSE	TRUE	FALSE	FALSE	FALSE	FALSE	FALSE	FALSE	FALSE	FALSE	Nucleus	1	18	CHEMBL415049	BARASERTIB	FALSE	3	FALSE	Reactome	Resolution of Sister Chromatid Cohesion	9	0	2	6	1	0	50.9
AURKB	ENSG00000178999	aurora kinase B	240	4	FALSE	TRUE	FALSE	TRUE	FALSE	FALSE	FALSE	FALSE	FALSE	FALSE	FALSE	FALSE	Nucleus	1	18	CHEMBL3545428	CHIAURANIB	FALSE	3	FALSE	Reactome	Resolution of Sister Chromatid Cohesion	9	0	2	6	1	0	50.9
AURKB	ENSG00000178999	aurora kinase B	240	4	FALSE	TRUE	FALSE	TRUE	FALSE	FALSE	FALSE	FALSE	FALSE	FALSE	FALSE	FALSE	Nucleus	1	18	CHEMBL482968	ENMD-2076	FALSE	2	FALSE	Reactome	Transcriptional Regulation by TP53	9	0	2	6	1	0	50.9
AURKB	ENSG00000178999	aurora kinase B	240	4	FALSE	TRUE	FALSE	TRUE	FALSE	FALSE	FALSE	FALSE	FALSE	FALSE	FALSE	FALSE	Nucleus	1	18	CHEMBL482968	ENMD-2076	FALSE	2	FALSE	Reactome	Transcriptional Regulation by TP53	9	0	2	6	1	0	50.9
AURKB	ENSG00000178999	aurora kinase B	240	4	FALSE	TRUE	FALSE	TRUE	FALSE	FALSE	FALSE	FALSE	FALSE	FALSE	FALSE	FALSE	Nucleus	1	18	CHEMBL3545428	CHIAURANIB	FALSE	3	FALSE	Reactome	Mitotic Prometaphase	9	0	2	6	1	0	50.9
AURKB	ENSG00000178999	aurora kinase B	240	4	FALSE	TRUE	FALSE	TRUE	FALSE	FALSE	FALSE	FALSE	FALSE	FALSE	FALSE	FALSE	Nucleus	1	18	CHEMBL402548	DANUSERTIB	FALSE	2	FALSE	Reactome	Mitotic Prometaphase	9	0	2	6	1	0	50.9
AURKB	ENSG00000178999	aurora kinase B	240	4	FALSE	TRUE	FALSE	TRUE	FALSE	FALSE	FALSE	FALSE	FALSE	FALSE	FALSE	FALSE	Nucleus	1	18	CHEMBL572878	TOZASERTIB	FALSE	2	FALSE	Reactome	Transcriptional Regulation by TP53	9	0	2	6	1	0	50.9
AURKB	ENSG00000178999	aurora kinase B	240	4	FALSE	TRUE	FALSE	TRUE	FALSE	FALSE	FALSE	FALSE	FALSE	FALSE	FALSE	FALSE	Nucleus	1	18	CHEMBL3545395	BI-811283	FALSE	2	FALSE	Reactome	APC/C:Cdh1 mediated degradation of Cdc20 and other APC/C:Cdh1 targeted proteins in late mitosis/early G1	9	0	2	6	1	0	50.9
AURKB	ENSG00000178999	aurora kinase B	240	4	FALSE	TRUE	FALSE	TRUE	FALSE	FALSE	FALSE	FALSE	FALSE	FALSE	FALSE	FALSE	Nucleus	1	18	CHEMBL402548	DANUSERTIB	FALSE	2	FALSE	Reactome	Mitotic Prometaphase	9	0	2	6	1	0	50.9
AURKB	ENSG00000178999	aurora kinase B	240	4	FALSE	TRUE	FALSE	TRUE	FALSE	FALSE	FALSE	FALSE	FALSE	FALSE	FALSE	FALSE	Nucleus	1	18	CHEMBL482968	ENMD-2076	FALSE	2	FALSE	Reactome	SUMO E3 ligases SUMOylate target proteins	9	0	2	6	1	0	50.9
AURKB	ENSG00000178999	aurora kinase B	240	4	FALSE	TRUE	FALSE	TRUE	FALSE	FALSE	FALSE	FALSE	FALSE	FALSE	FALSE	FALSE	Nucleus	1	18	CHEMBL495727	AT-9283	FALSE	2	FALSE	Reactome	Mitotic Prometaphase	9	0	2	6	1	0	50.9
AURKB	ENSG00000178999	aurora kinase B	240	4	FALSE	TRUE	FALSE	TRUE	FALSE	FALSE	FALSE	FALSE	FALSE	FALSE	FALSE	FALSE	Nucleus	1	18	CHEMBL572878	TOZASERTIB	FALSE	2	FALSE	Reactome	Mitotic Prometaphase	9	0	2	6	1	0	50.9
AURKB	ENSG00000178999	aurora kinase B	240	4	FALSE	TRUE	FALSE	TRUE	FALSE	FALSE	FALSE	FALSE	FALSE	FALSE	FALSE	FALSE	Nucleus	1	18	CHEMBL402548	DANUSERTIB	FALSE	2	FALSE	Reactome	APC/C:Cdh1 mediated degradation of Cdc20 and other APC/C:Cdh1 targeted proteins in late mitosis/early G1	9	0	2	6	1	0	50.9
AURKB	ENSG00000178999	aurora kinase B	240	4	FALSE	TRUE	FALSE	TRUE	FALSE	FALSE	FALSE	FALSE	FALSE	FALSE	FALSE	FALSE	Nucleus	1	18	CHEMBL572878	TOZASERTIB	FALSE	2	FALSE	Reactome	APC/C:Cdh1 mediated degradation of Cdc20 and other APC/C:Cdh1 targeted proteins in late mitosis/early G1	9	0	2	6	1	0	50.9
AURKB	ENSG00000178999	aurora kinase B	240	4	FALSE	TRUE	FALSE	TRUE	FALSE	FALSE	FALSE	FALSE	FALSE	FALSE	FALSE	FALSE	Nucleus	1	18	CHEMBL3545395	BI-811283	FALSE	2	FALSE	Reactome	Transcriptional Regulation by TP53	9	0	2	6	1	0	50.9
AURKB	ENSG00000178999	aurora kinase B	240	4	FALSE	TRUE	FALSE	TRUE	FALSE	FALSE	FALSE	FALSE	FALSE	FALSE	FALSE	FALSE	Nucleus	1	18	CHEMBL3545395	BI-811283	FALSE	2	FALSE	Reactome	Resolution of Sister Chromatid Cohesion	9	0	2	6	1	0	50.9
AURKB	ENSG00000178999	aurora kinase B	240	4	FALSE	TRUE	FALSE	TRUE	FALSE	FALSE	FALSE	FALSE	FALSE	FALSE	FALSE	FALSE	Nucleus	1	18	CHEMBL482968	ENMD-2076	FALSE	2	FALSE	Reactome	SUMOylation of DNA replication proteins	9	0	2	6	1	0	50.9
AURKB	ENSG00000178999	aurora kinase B	240	4	FALSE	TRUE	FALSE	TRUE	FALSE	FALSE	FALSE	FALSE	FALSE	FALSE	FALSE	FALSE	Nucleus	1	18	CHEMBL402548	DANUSERTIB	FALSE	2	FALSE	Reactome	SUMOylation	9	0	2	6	1	0	50.9
AURKB	ENSG00000178999	aurora kinase B	240	4	FALSE	TRUE	FALSE	TRUE	FALSE	FALSE	FALSE	FALSE	FALSE	FALSE	FALSE	FALSE	Nucleus	1	18	CHEMBL402548	DANUSERTIB	FALSE	2	FALSE	Reactome	SUMOylation	9	0	2	6	1	0	50.9
AURKB	ENSG00000178999	aurora kinase B	240	4	FALSE	TRUE	FALSE	TRUE	FALSE	FALSE	FALSE	FALSE	FALSE	FALSE	FALSE	FALSE	Nucleus	1	18	CHEMBL482967	CYC-116	FALSE	1	FALSE	Reactome	APC/C:Cdh1 mediated degradation of Cdc20 and other APC/C:Cdh1 targeted proteins in late mitosis/early G1	9	0	2	6	1	0	50.9
AURKB	ENSG00000178999	aurora kinase B	240	4	FALSE	TRUE	FALSE	TRUE	FALSE	FALSE	FALSE	FALSE	FALSE	FALSE	FALSE	FALSE	Nucleus	1	18	CHEMBL3545428	CHIAURANIB	FALSE	3	FALSE	Reactome	Mitotic Prometaphase	9	0	2	6	1	0	50.9
AURKB	ENSG00000178999	aurora kinase B	240	4	FALSE	TRUE	FALSE	TRUE	FALSE	FALSE	FALSE	FALSE	FALSE	FALSE	FALSE	FALSE	Nucleus	1	18	CHEMBL572878	TOZASERTIB	FALSE	2	FALSE	Reactome	SUMO E3 ligases SUMOylate target proteins	9	0	2	6	1	0	50.9
AURKB	ENSG00000178999	aurora kinase B	240	4	FALSE	TRUE	FALSE	TRUE	FALSE	FALSE	FALSE	FALSE	FALSE	FALSE	FALSE	FALSE	Nucleus	1	18	CHEMBL482968	ENMD-2076	FALSE	2	FALSE	Reactome	SUMOylation of DNA replication proteins	9	0	2	6	1	0	50.9
AURKB	ENSG00000178999	aurora kinase B	240	4	FALSE	TRUE	FALSE	TRUE	FALSE	FALSE	FALSE	FALSE	FALSE	FALSE	FALSE	FALSE	Nucleus	1	18	CHEMBL482968	ENMD-2076	FALSE	2	FALSE	Reactome	Regulation of TP53 Activity	9	0	2	6	1	0	50.9
AURKB	ENSG00000178999	aurora kinase B	240	4	FALSE	TRUE	FALSE	TRUE	FALSE	FALSE	FALSE	FALSE	FALSE	FALSE	FALSE	FALSE	Nucleus	1	18	CHEMBL482968	ENMD-2076	FALSE	2	FALSE	Reactome	SUMO E3 ligases SUMOylate target proteins	9	0	2	6	1	0	50.9
AURKB	ENSG00000178999	aurora kinase B	240	4	FALSE	TRUE	FALSE	TRUE	FALSE	FALSE	FALSE	FALSE	FALSE	FALSE	FALSE	FALSE	Nucleus	1	18	CHEMBL3545428	CHIAURANIB	FALSE	3	FALSE	Reactome	Cell Cycle Checkpoints	9	0	2	6	1	0	50.9
AURKB	ENSG00000178999	aurora kinase B	240	4	FALSE	TRUE	FALSE	TRUE	FALSE	FALSE	FALSE	FALSE	FALSE	FALSE	FALSE	FALSE	Nucleus	1	18	CHEMBL402548	DANUSERTIB	FALSE	2	FALSE	Reactome	Resolution of Sister Chromatid Cohesion	9	0	2	6	1	0	50.9
AURKB	ENSG00000178999	aurora kinase B	240	4	FALSE	TRUE	FALSE	TRUE	FALSE	FALSE	FALSE	FALSE	FALSE	FALSE	FALSE	FALSE	Nucleus	1	18	CHEMBL572878	TOZASERTIB	FALSE	2	FALSE	Reactome	SUMO E3 ligases SUMOylate target proteins	9	0	2	6	1	0	50.9
AURKB	ENSG00000178999	aurora kinase B	240	4	FALSE	TRUE	FALSE	TRUE	FALSE	FALSE	FALSE	FALSE	FALSE	FALSE	FALSE	FALSE	Nucleus	1	18	CHEMBL415049	BARASERTIB	FALSE	3	FALSE	Reactome	Transcriptional Regulation by TP53	9	0	2	6	1	0	50.9
AURKB	ENSG00000178999	aurora kinase B	240	4	FALSE	TRUE	FALSE	TRUE	FALSE	FALSE	FALSE	FALSE	FALSE	FALSE	FALSE	FALSE	Nucleus	1	18	CHEMBL482968	ENMD-2076	FALSE	2	FALSE	Reactome	SUMOylation	9	0	2	6	1	0	50.9
AURKB	ENSG00000178999	aurora kinase B	240	4	FALSE	TRUE	FALSE	TRUE	FALSE	FALSE	FALSE	FALSE	FALSE	FALSE	FALSE	FALSE	Nucleus	1	18	CHEMBL415049	BARASERTIB	FALSE	3	FALSE	Reactome	SUMOylation of DNA replication proteins	9	0	2	6	1	0	50.9
AURKB	ENSG00000178999	aurora kinase B	240	4	FALSE	TRUE	FALSE	TRUE	FALSE	FALSE	FALSE	FALSE	FALSE	FALSE	FALSE	FALSE	Nucleus	1	18	CHEMBL3545428	CHIAURANIB	FALSE	3	FALSE	Reactome	Mitotic Prometaphase	9	0	2	6	1	0	50.9
AURKB	ENSG00000178999	aurora kinase B	240	4	FALSE	TRUE	FALSE	TRUE	FALSE	FALSE	FALSE	FALSE	FALSE	FALSE	FALSE	FALSE	Nucleus	1	18	CHEMBL482968	ENMD-2076	FALSE	2	FALSE	Reactome	SUMOylation	9	0	2	6	1	0	50.9
AURKB	ENSG00000178999	aurora kinase B	240	4	FALSE	TRUE	FALSE	TRUE	FALSE	FALSE	FALSE	FALSE	FALSE	FALSE	FALSE	FALSE	Nucleus	1	18	CHEMBL482968	ENMD-2076	FALSE	2	FALSE	Reactome	APC/C:Cdh1 mediated degradation of Cdc20 and other APC/C:Cdh1 targeted proteins in late mitosis/early G1	9	0	2	6	1	0	50.9
AURKB	ENSG00000178999	aurora kinase B	240	4	FALSE	TRUE	FALSE	TRUE	FALSE	FALSE	FALSE	FALSE	FALSE	FALSE	FALSE	FALSE	Nucleus	1	18	CHEMBL572878	TOZASERTIB	FALSE	2	FALSE	Reactome	APC/C:Cdh1 mediated degradation of Cdc20 and other APC/C:Cdh1 targeted proteins in late mitosis/early G1	9	0	2	6	1	0	50.9
AURKB	ENSG00000178999	aurora kinase B	240	4	FALSE	TRUE	FALSE	TRUE	FALSE	FALSE	FALSE	FALSE	FALSE	FALSE	FALSE	FALSE	Nucleus	1	18	CHEMBL482968	ENMD-2076	FALSE	2	FALSE	Reactome	Mitotic Prometaphase	9	0	2	6	1	0	50.9
AURKB	ENSG00000178999	aurora kinase B	240	4	FALSE	TRUE	FALSE	TRUE	FALSE	FALSE	FALSE	FALSE	FALSE	FALSE	FALSE	FALSE	Nucleus	1	18	CHEMBL3545428	CHIAURANIB	FALSE	3	FALSE	Reactome	Mitotic Prometaphase	9	0	2	6	1	0	50.9
AURKB	ENSG00000178999	aurora kinase B	240	4	FALSE	TRUE	FALSE	TRUE	FALSE	FALSE	FALSE	FALSE	FALSE	FALSE	FALSE	FALSE	Nucleus	1	18	CHEMBL415049	BARASERTIB	FALSE	3	FALSE	Reactome	APC/C:Cdh1 mediated degradation of Cdc20 and other APC/C:Cdh1 targeted proteins in late mitosis/early G1	9	0	2	6	1	0	50.9
AURKB	ENSG00000178999	aurora kinase B	240	4	FALSE	TRUE	FALSE	TRUE	FALSE	FALSE	FALSE	FALSE	FALSE	FALSE	FALSE	FALSE	Nucleus	1	18	CHEMBL482968	ENMD-2076	FALSE	2	FALSE	Reactome	SUMO E3 ligases SUMOylate target proteins	9	0	2	6	1	0	50.9
AURKB	ENSG00000178999	aurora kinase B	240	4	FALSE	TRUE	FALSE	TRUE	FALSE	FALSE	FALSE	FALSE	FALSE	FALSE	FALSE	FALSE	Nucleus	1	18	CHEMBL572878	TOZASERTIB	FALSE	2	FALSE	Reactome	SUMOylation of DNA replication proteins	9	0	2	6	1	0	50.9
AURKB	ENSG00000178999	aurora kinase B	240	4	FALSE	TRUE	FALSE	TRUE	FALSE	FALSE	FALSE	FALSE	FALSE	FALSE	FALSE	FALSE	Nucleus	1	18	CHEMBL1980297	ILORASERTIB	FALSE	2	FALSE	Reactome	SUMO E3 ligases SUMOylate target proteins	9	0	2	6	1	0	50.9
AURKB	ENSG00000178999	aurora kinase B	240	4	FALSE	TRUE	FALSE	TRUE	FALSE	FALSE	FALSE	FALSE	FALSE	FALSE	FALSE	FALSE	Nucleus	1	18	CHEMBL482967	CYC-116	FALSE	1	FALSE	Reactome	SUMO E3 ligases SUMOylate target proteins	9	0	2	6	1	0	50.9
AURKB	ENSG00000178999	aurora kinase B	240	4	FALSE	TRUE	FALSE	TRUE	FALSE	FALSE	FALSE	FALSE	FALSE	FALSE	FALSE	FALSE	Nucleus	1	18	CHEMBL482968	ENMD-2076	FALSE	2	FALSE	Reactome	Resolution of Sister Chromatid Cohesion	9	0	2	6	1	0	50.9
AURKB	ENSG00000178999	aurora kinase B	240	4	FALSE	TRUE	FALSE	TRUE	FALSE	FALSE	FALSE	FALSE	FALSE	FALSE	FALSE	FALSE	Nucleus	1	18	CHEMBL482968	ENMD-2076	FALSE	2	FALSE	Reactome	SUMOylation	9	0	2	6	1	0	50.9
AURKB	ENSG00000178999	aurora kinase B	240	4	FALSE	TRUE	FALSE	TRUE	FALSE	FALSE	FALSE	FALSE	FALSE	FALSE	FALSE	FALSE	Nucleus	1	18	CHEMBL402548	DANUSERTIB	FALSE	2	FALSE	Reactome	APC/C:Cdh1 mediated degradation of Cdc20 and other APC/C:Cdh1 targeted proteins in late mitosis/early G1	9	0	2	6	1	0	50.9
AURKB	ENSG00000178999	aurora kinase B	240	4	FALSE	TRUE	FALSE	TRUE	FALSE	FALSE	FALSE	FALSE	FALSE	FALSE	FALSE	FALSE	Nucleus	1	18	CHEMBL3545428	CHIAURANIB	FALSE	3	FALSE	Reactome	APC/C:Cdh1 mediated degradation of Cdc20 and other APC/C:Cdh1 targeted proteins in late mitosis/early G1	9	0	2	6	1	0	50.9
AURKB	ENSG00000178999	aurora kinase B	240	4	FALSE	TRUE	FALSE	TRUE	FALSE	FALSE	FALSE	FALSE	FALSE	FALSE	FALSE	FALSE	Nucleus	1	18	CHEMBL482968	ENMD-2076	FALSE	2	FALSE	Reactome	APC/C:Cdh1 mediated degradation of Cdc20 and other APC/C:Cdh1 targeted proteins in late mitosis/early G1	9	0	2	6	1	0	50.9
AURKB	ENSG00000178999	aurora kinase B	240	4	FALSE	TRUE	FALSE	TRUE	FALSE	FALSE	FALSE	FALSE	FALSE	FALSE	FALSE	FALSE	Nucleus	1	18	CHEMBL482968	ENMD-2076	FALSE	2	FALSE	Reactome	APC/C:Cdh1 mediated degradation of Cdc20 and other APC/C:Cdh1 targeted proteins in late mitosis/early G1	9	0	2	6	1	0	50.9
AURKB	ENSG00000178999	aurora kinase B	240	4	FALSE	TRUE	FALSE	TRUE	FALSE	FALSE	FALSE	FALSE	FALSE	FALSE	FALSE	FALSE	Nucleus	1	18	CHEMBL415049	BARASERTIB	FALSE	3	FALSE	Reactome	APC/C:Cdh1 mediated degradation of Cdc20 and other APC/C:Cdh1 targeted proteins in late mitosis/early G1	9	0	2	6	1	0	50.9
AURKB	ENSG00000178999	aurora kinase B	240	4	FALSE	TRUE	FALSE	TRUE	FALSE	FALSE	FALSE	FALSE	FALSE	FALSE	FALSE	FALSE	Nucleus	1	18	CHEMBL415049	BARASERTIB	FALSE	3	FALSE	Reactome	APC/C:Cdh1 mediated degradation of Cdc20 and other APC/C:Cdh1 targeted proteins in late mitosis/early G1	9	0	2	6	1	0	50.9
AURKB	ENSG00000178999	aurora kinase B	240	4	FALSE	TRUE	FALSE	TRUE	FALSE	FALSE	FALSE	FALSE	FALSE	FALSE	FALSE	FALSE	Nucleus	1	18	CHEMBL3545395	BI-811283	FALSE	2	FALSE	Reactome	SUMOylation	9	0	2	6	1	0	50.9
AURKB	ENSG00000178999	aurora kinase B	240	4	FALSE	TRUE	FALSE	TRUE	FALSE	FALSE	FALSE	FALSE	FALSE	FALSE	FALSE	FALSE	Nucleus	1	18	CHEMBL572878	TOZASERTIB	FALSE	2	FALSE	Reactome	Mitotic Prometaphase	9	0	2	6	1	0	50.9
AURKB	ENSG00000178999	aurora kinase B	240	4	FALSE	TRUE	FALSE	TRUE	FALSE	FALSE	FALSE	FALSE	FALSE	FALSE	FALSE	FALSE	Nucleus	1	18	CHEMBL3545428	CHIAURANIB	FALSE	3	FALSE	Reactome	Transcriptional Regulation by TP53	9	0	2	6	1	0	50.9
AURKB	ENSG00000178999	aurora kinase B	240	4	FALSE	TRUE	FALSE	TRUE	FALSE	FALSE	FALSE	FALSE	FALSE	FALSE	FALSE	FALSE	Nucleus	1	18	CHEMBL3545428	CHIAURANIB	FALSE	3	FALSE	Reactome	SUMO E3 ligases SUMOylate target proteins	9	0	2	6	1	0	50.9
AURKB	ENSG00000178999	aurora kinase B	240	4	FALSE	TRUE	FALSE	TRUE	FALSE	FALSE	FALSE	FALSE	FALSE	FALSE	FALSE	FALSE	Nucleus	1	18	CHEMBL572878	TOZASERTIB	FALSE	2	FALSE	Reactome	Transcriptional Regulation by TP53	9	0	2	6	1	0	50.9
AURKB	ENSG00000178999	aurora kinase B	240	4	FALSE	TRUE	FALSE	TRUE	FALSE	FALSE	FALSE	FALSE	FALSE	FALSE	FALSE	FALSE	Nucleus	1	18	CHEMBL482968	ENMD-2076	FALSE	2	FALSE	Reactome	Transcriptional Regulation by TP53	9	0	2	6	1	0	50.9
AURKB	ENSG00000178999	aurora kinase B	240	4	FALSE	TRUE	FALSE	TRUE	FALSE	FALSE	FALSE	FALSE	FALSE	FALSE	FALSE	FALSE	Nucleus	1	18	CHEMBL1980297	ILORASERTIB	FALSE	2	FALSE	Reactome	SUMOylation	9	0	2	6	1	0	50.9
AURKB	ENSG00000178999	aurora kinase B	240	4	FALSE	TRUE	FALSE	TRUE	FALSE	FALSE	FALSE	FALSE	FALSE	FALSE	FALSE	FALSE	Nucleus	1	18	CHEMBL482968	ENMD-2076	FALSE	2	FALSE	Reactome	SUMOylation	9	0	2	6	1	0	50.9
AURKB	ENSG00000178999	aurora kinase B	240	4	FALSE	TRUE	FALSE	TRUE	FALSE	FALSE	FALSE	FALSE	FALSE	FALSE	FALSE	FALSE	Nucleus	1	18	CHEMBL572878	TOZASERTIB	FALSE	2	FALSE	Reactome	SUMOylation	9	0	2	6	1	0	50.9
AURKB	ENSG00000178999	aurora kinase B	240	4	FALSE	TRUE	FALSE	TRUE	FALSE	FALSE	FALSE	FALSE	FALSE	FALSE	FALSE	FALSE	Nucleus	1	18	CHEMBL495727	AT-9283	FALSE	2	FALSE	Reactome	APC/C:Cdh1 mediated degradation of Cdc20 and other APC/C:Cdh1 targeted proteins in late mitosis/early G1	9	0	2	6	1	0	50.9
AURKB	ENSG00000178999	aurora kinase B	240	4	FALSE	TRUE	FALSE	TRUE	FALSE	FALSE	FALSE	FALSE	FALSE	FALSE	FALSE	FALSE	Nucleus	1	18	CHEMBL495727	AT-9283	FALSE	2	FALSE	Reactome	SUMOylation	9	0	2	6	1	0	50.9
AURKB	ENSG00000178999	aurora kinase B	240	4	FALSE	TRUE	FALSE	TRUE	FALSE	FALSE	FALSE	FALSE	FALSE	FALSE	FALSE	FALSE	Nucleus	1	18	CHEMBL482968	ENMD-2076	FALSE	2	FALSE	Reactome	APC/C:Cdh1 mediated degradation of Cdc20 and other APC/C:Cdh1 targeted proteins in late mitosis/early G1	9	0	2	6	1	0	50.9
AURKB	ENSG00000178999	aurora kinase B	240	4	FALSE	TRUE	FALSE	TRUE	FALSE	FALSE	FALSE	FALSE	FALSE	FALSE	FALSE	FALSE	Nucleus	1	18	CHEMBL402548	DANUSERTIB	FALSE	2	FALSE	Reactome	APC/C:Cdh1 mediated degradation of Cdc20 and other APC/C:Cdh1 targeted proteins in late mitosis/early G1	9	0	2	6	1	0	50.9
AURKB	ENSG00000178999	aurora kinase B	240	4	FALSE	TRUE	FALSE	TRUE	FALSE	FALSE	FALSE	FALSE	FALSE	FALSE	FALSE	FALSE	Nucleus	1	18	CHEMBL1980297	ILORASERTIB	FALSE	2	FALSE	Reactome	APC/C:Cdh1 mediated degradation of Cdc20 and other APC/C:Cdh1 targeted proteins in late mitosis/early G1	9	0	2	6	1	0	50.9
AURKB	ENSG00000178999	aurora kinase B	240	4	FALSE	TRUE	FALSE	TRUE	FALSE	FALSE	FALSE	FALSE	FALSE	FALSE	FALSE	FALSE	Nucleus	1	18	CHEMBL482968	ENMD-2076	FALSE	2	FALSE	Reactome	Regulation of TP53 Activity	9	0	2	6	1	0	50.9
AURKB	ENSG00000178999	aurora kinase B	240	4	FALSE	TRUE	FALSE	TRUE	FALSE	FALSE	FALSE	FALSE	FALSE	FALSE	FALSE	FALSE	Nucleus	1	18	CHEMBL402548	DANUSERTIB	FALSE	2	FALSE	Reactome	SUMOylation of DNA replication proteins	9	0	2	6	1	0	50.9
AURKB	ENSG00000178999	aurora kinase B	240	4	FALSE	TRUE	FALSE	TRUE	FALSE	FALSE	FALSE	FALSE	FALSE	FALSE	FALSE	FALSE	Nucleus	1	18	CHEMBL415049	BARASERTIB	FALSE	3	FALSE	Reactome	Regulation of TP53 Activity	9	0	2	6	1	0	50.9
AURKB	ENSG00000178999	aurora kinase B	240	4	FALSE	TRUE	FALSE	TRUE	FALSE	FALSE	FALSE	FALSE	FALSE	FALSE	FALSE	FALSE	Nucleus	1	18	CHEMBL482968	ENMD-2076	FALSE	2	FALSE	Reactome	Resolution of Sister Chromatid Cohesion	9	0	2	6	1	0	50.9
AURKB	ENSG00000178999	aurora kinase B	240	4	FALSE	TRUE	FALSE	TRUE	FALSE	FALSE	FALSE	FALSE	FALSE	FALSE	FALSE	FALSE	Nucleus	1	18	CHEMBL415049	BARASERTIB	FALSE	3	FALSE	Reactome	SUMO E3 ligases SUMOylate target proteins	9	0	2	6	1	0	50.9
AURKB	ENSG00000178999	aurora kinase B	240	4	FALSE	TRUE	FALSE	TRUE	FALSE	FALSE	FALSE	FALSE	FALSE	FALSE	FALSE	FALSE	Nucleus	1	18	CHEMBL482968	ENMD-2076	FALSE	2	FALSE	Reactome	SUMOylation	9	0	2	6	1	0	50.9
AURKB	ENSG00000178999	aurora kinase B	240	4	FALSE	TRUE	FALSE	TRUE	FALSE	FALSE	FALSE	FALSE	FALSE	FALSE	FALSE	FALSE	Nucleus	1	18	CHEMBL482968	ENMD-2076	FALSE	2	FALSE	Reactome	SUMOylation of DNA replication proteins	9	0	2	6	1	0	50.9
AURKB	ENSG00000178999	aurora kinase B	240	4	FALSE	TRUE	FALSE	TRUE	FALSE	FALSE	FALSE	FALSE	FALSE	FALSE	FALSE	FALSE	Nucleus	1	18	CHEMBL402548	DANUSERTIB	FALSE	2	FALSE	Reactome	SUMOylation	9	0	2	6	1	0	50.9
AURKB	ENSG00000178999	aurora kinase B	240	4	FALSE	TRUE	FALSE	TRUE	FALSE	FALSE	FALSE	FALSE	FALSE	FALSE	FALSE	FALSE	Nucleus	1	18	CHEMBL3545428	CHIAURANIB	FALSE	3	FALSE	Reactome	Resolution of Sister Chromatid Cohesion	9	0	2	6	1	0	50.9
AURKB	ENSG00000178999	aurora kinase B	240	4	FALSE	TRUE	FALSE	TRUE	FALSE	FALSE	FALSE	FALSE	FALSE	FALSE	FALSE	FALSE	Nucleus	1	18	CHEMBL572878	TOZASERTIB	FALSE	2	FALSE	Reactome	APC/C:Cdh1 mediated degradation of Cdc20 and other APC/C:Cdh1 targeted proteins in late mitosis/early G1	9	0	2	6	1	0	50.9
AURKB	ENSG00000178999	aurora kinase B	240	4	FALSE	TRUE	FALSE	TRUE	FALSE	FALSE	FALSE	FALSE	FALSE	FALSE	FALSE	FALSE	Nucleus	1	18	CHEMBL482968	ENMD-2076	FALSE	2	FALSE	Reactome	SUMOylation	9	0	2	6	1	0	50.9
AURKB	ENSG00000178999	aurora kinase B	240	4	FALSE	TRUE	FALSE	TRUE	FALSE	FALSE	FALSE	FALSE	FALSE	FALSE	FALSE	FALSE	Nucleus	1	18	CHEMBL482968	ENMD-2076	FALSE	2	FALSE	Reactome	APC/C:Cdh1 mediated degradation of Cdc20 and other APC/C:Cdh1 targeted proteins in late mitosis/early G1	9	0	2	6	1	0	50.9
AURKB	ENSG00000178999	aurora kinase B	240	4	FALSE	TRUE	FALSE	TRUE	FALSE	FALSE	FALSE	FALSE	FALSE	FALSE	FALSE	FALSE	Nucleus	1	18	CHEMBL402548	DANUSERTIB	FALSE	2	FALSE	Reactome	SUMO E3 ligases SUMOylate target proteins	9	0	2	6	1	0	50.9
AURKB	ENSG00000178999	aurora kinase B	240	4	FALSE	TRUE	FALSE	TRUE	FALSE	FALSE	FALSE	FALSE	FALSE	FALSE	FALSE	FALSE	Nucleus	1	18	CHEMBL572878	TOZASERTIB	FALSE	2	FALSE	Reactome	Resolution of Sister Chromatid Cohesion	9	0	2	6	1	0	50.9
AURKB	ENSG00000178999	aurora kinase B	240	4	FALSE	TRUE	FALSE	TRUE	FALSE	FALSE	FALSE	FALSE	FALSE	FALSE	FALSE	FALSE	Nucleus	1	18	CHEMBL482968	ENMD-2076	FALSE	2	FALSE	Reactome	Resolution of Sister Chromatid Cohesion	9	0	2	6	1	0	50.9
AURKB	ENSG00000178999	aurora kinase B	240	4	FALSE	TRUE	FALSE	TRUE	FALSE	FALSE	FALSE	FALSE	FALSE	FALSE	FALSE	FALSE	Nucleus	1	18	CHEMBL3545428	CHIAURANIB	FALSE	3	FALSE	Reactome	SUMOylation	9	0	2	6	1	0	50.9
AURKB	ENSG00000178999	aurora kinase B	240	4	FALSE	TRUE	FALSE	TRUE	FALSE	FALSE	FALSE	FALSE	FALSE	FALSE	FALSE	FALSE	Nucleus	1	18	CHEMBL482968	ENMD-2076	FALSE	2	FALSE	Reactome	Mitotic Prometaphase	9	0	2	6	1	0	50.9
AURKB	ENSG00000178999	aurora kinase B	240	4	FALSE	TRUE	FALSE	TRUE	FALSE	FALSE	FALSE	FALSE	FALSE	FALSE	FALSE	FALSE	Nucleus	1	18	CHEMBL572878	TOZASERTIB	FALSE	2	FALSE	Reactome	SUMOylation	9	0	2	6	1	0	50.9
AURKB	ENSG00000178999	aurora kinase B	240	4	FALSE	TRUE	FALSE	TRUE	FALSE	FALSE	FALSE	FALSE	FALSE	FALSE	FALSE	FALSE	Nucleus	1	18	CHEMBL3545428	CHIAURANIB	FALSE	3	FALSE	Reactome	SUMOylation	9	0	2	6	1	0	50.9
AURKB	ENSG00000178999	aurora kinase B	240	4	FALSE	TRUE	FALSE	TRUE	FALSE	FALSE	FALSE	FALSE	FALSE	FALSE	FALSE	FALSE	Nucleus	1	18	CHEMBL3545428	CHIAURANIB	FALSE	3	FALSE	Reactome	APC/C:Cdh1 mediated degradation of Cdc20 and other APC/C:Cdh1 targeted proteins in late mitosis/early G1	9	0	2	6	1	0	50.9
AURKB	ENSG00000178999	aurora kinase B	240	4	FALSE	TRUE	FALSE	TRUE	FALSE	FALSE	FALSE	FALSE	FALSE	FALSE	FALSE	FALSE	Nucleus	1	18	CHEMBL415049	BARASERTIB	FALSE	3	FALSE	Reactome	SUMO E3 ligases SUMOylate target proteins	9	0	2	6	1	0	50.9
AURKB	ENSG00000178999	aurora kinase B	240	4	FALSE	TRUE	FALSE	TRUE	FALSE	FALSE	FALSE	FALSE	FALSE	FALSE	FALSE	FALSE	Nucleus	1	18	CHEMBL402548	DANUSERTIB	FALSE	2	FALSE	Reactome	Transcriptional Regulation by TP53	9	0	2	6	1	0	50.9
AURKB	ENSG00000178999	aurora kinase B	240	4	FALSE	TRUE	FALSE	TRUE	FALSE	FALSE	FALSE	FALSE	FALSE	FALSE	FALSE	FALSE	Nucleus	1	18	CHEMBL415049	BARASERTIB	FALSE	3	FALSE	Reactome	Transcriptional Regulation by TP53	9	0	2	6	1	0	50.9
AURKB	ENSG00000178999	aurora kinase B	240	4	FALSE	TRUE	FALSE	TRUE	FALSE	FALSE	FALSE	FALSE	FALSE	FALSE	FALSE	FALSE	Nucleus	1	18	CHEMBL3545428	CHIAURANIB	FALSE	3	FALSE	Reactome	SUMOylation	9	0	2	6	1	0	50.9
AURKB	ENSG00000178999	aurora kinase B	240	4	FALSE	TRUE	FALSE	TRUE	FALSE	FALSE	FALSE	FALSE	FALSE	FALSE	FALSE	FALSE	Nucleus	1	18	CHEMBL3545428	CHIAURANIB	FALSE	3	FALSE	Reactome	APC/C:Cdh1 mediated degradation of Cdc20 and other APC/C:Cdh1 targeted proteins in late mitosis/early G1	9	0	2	6	1	0	50.9
AURKB	ENSG00000178999	aurora kinase B	240	4	FALSE	TRUE	FALSE	TRUE	FALSE	FALSE	FALSE	FALSE	FALSE	FALSE	FALSE	FALSE	Nucleus	1	18	CHEMBL482967	CYC-116	FALSE	1	FALSE	Reactome	Transcriptional Regulation by TP53	9	0	2	6	1	0	50.9
AURKB	ENSG00000178999	aurora kinase B	240	4	FALSE	TRUE	FALSE	TRUE	FALSE	FALSE	FALSE	FALSE	FALSE	FALSE	FALSE	FALSE	Nucleus	1	18	CHEMBL3545395	BI-811283	FALSE	2	FALSE	Reactome	Mitotic Prometaphase	9	0	2	6	1	0	50.9
AURKB	ENSG00000178999	aurora kinase B	240	4	FALSE	TRUE	FALSE	TRUE	FALSE	FALSE	FALSE	FALSE	FALSE	FALSE	FALSE	FALSE	Nucleus	1	18	CHEMBL3545428	CHIAURANIB	FALSE	3	FALSE	Reactome	SUMOylation	9	0	2	6	1	0	50.9
AURKB	ENSG00000178999	aurora kinase B	240	4	FALSE	TRUE	FALSE	TRUE	FALSE	FALSE	FALSE	FALSE	FALSE	FALSE	FALSE	FALSE	Nucleus	1	18	CHEMBL482968	ENMD-2076	FALSE	2	FALSE	Reactome	Resolution of Sister Chromatid Cohesion	9	0	2	6	1	0	50.9
AURKB	ENSG00000178999	aurora kinase B	240	4	FALSE	TRUE	FALSE	TRUE	FALSE	FALSE	FALSE	FALSE	FALSE	FALSE	FALSE	FALSE	Nucleus	1	18	CHEMBL402548	DANUSERTIB	FALSE	2	FALSE	Reactome	SUMO E3 ligases SUMOylate target proteins	9	0	2	6	1	0	50.9
AURKB	ENSG00000178999	aurora kinase B	240	4	FALSE	TRUE	FALSE	TRUE	FALSE	FALSE	FALSE	FALSE	FALSE	FALSE	FALSE	FALSE	Nucleus	1	18	CHEMBL482968	ENMD-2076	FALSE	2	FALSE	Reactome	Mitotic Prometaphase	9	0	2	6	1	0	50.9
AURKB	ENSG00000178999	aurora kinase B	240	4	FALSE	TRUE	FALSE	TRUE	FALSE	FALSE	FALSE	FALSE	FALSE	FALSE	FALSE	FALSE	Nucleus	1	18	CHEMBL482968	ENMD-2076	FALSE	2	FALSE	Reactome	SUMO E3 ligases SUMOylate target proteins	9	0	2	6	1	0	50.9
AURKB	ENSG00000178999	aurora kinase B	240	4	FALSE	TRUE	FALSE	TRUE	FALSE	FALSE	FALSE	FALSE	FALSE	FALSE	FALSE	FALSE	Nucleus	1	18	CHEMBL482968	ENMD-2076	FALSE	2	FALSE	Reactome	Mitotic Prometaphase	9	0	2	6	1	0	50.9
AURKB	ENSG00000178999	aurora kinase B	240	4	FALSE	TRUE	FALSE	TRUE	FALSE	FALSE	FALSE	FALSE	FALSE	FALSE	FALSE	FALSE	Nucleus	1	18	CHEMBL572878	TOZASERTIB	FALSE	2	FALSE	Reactome	Transcriptional Regulation by TP53	9	0	2	6	1	0	50.9
AURKB	ENSG00000178999	aurora kinase B	240	4	FALSE	TRUE	FALSE	TRUE	FALSE	FALSE	FALSE	FALSE	FALSE	FALSE	FALSE	FALSE	Nucleus	1	18	CHEMBL495727	AT-9283	FALSE	2	FALSE	Reactome	SUMO E3 ligases SUMOylate target proteins	9	0	2	6	1	0	50.9
AURKB	ENSG00000178999	aurora kinase B	240	4	FALSE	TRUE	FALSE	TRUE	FALSE	FALSE	FALSE	FALSE	FALSE	FALSE	FALSE	FALSE	Nucleus	1	18	CHEMBL415049	BARASERTIB	FALSE	3	FALSE	Reactome	Mitotic Prometaphase	9	0	2	6	1	0	50.9
AURKB	ENSG00000178999	aurora kinase B	240	4	FALSE	TRUE	FALSE	TRUE	FALSE	FALSE	FALSE	FALSE	FALSE	FALSE	FALSE	FALSE	Nucleus	1	18	CHEMBL482968	ENMD-2076	FALSE	2	FALSE	Reactome	APC/C:Cdh1 mediated degradation of Cdc20 and other APC/C:Cdh1 targeted proteins in late mitosis/early G1	9	0	2	6	1	0	50.9
AURKB	ENSG00000178999	aurora kinase B	240	4	FALSE	TRUE	FALSE	TRUE	FALSE	FALSE	FALSE	FALSE	FALSE	FALSE	FALSE	FALSE	Nucleus	1	18	CHEMBL415049	BARASERTIB	FALSE	3	FALSE	Reactome	SUMO E3 ligases SUMOylate target proteins	9	0	2	6	1	0	50.9
AURKB	ENSG00000178999	aurora kinase B	240	4	FALSE	TRUE	FALSE	TRUE	FALSE	FALSE	FALSE	FALSE	FALSE	FALSE	FALSE	FALSE	Nucleus	1	18	CHEMBL482968	ENMD-2076	FALSE	2	FALSE	Reactome	SUMOylation of DNA replication proteins	9	0	2	6	1	0	50.9
AURKB	ENSG00000178999	aurora kinase B	240	4	FALSE	TRUE	FALSE	TRUE	FALSE	FALSE	FALSE	FALSE	FALSE	FALSE	FALSE	FALSE	Nucleus	1	18	CHEMBL572878	TOZASERTIB	FALSE	2	FALSE	Reactome	SUMOylation of DNA replication proteins	9	0	2	6	1	0	50.9
AURKB	ENSG00000178999	aurora kinase B	240	4	FALSE	TRUE	FALSE	TRUE	FALSE	FALSE	FALSE	FALSE	FALSE	FALSE	FALSE	FALSE	Nucleus	1	18	CHEMBL1980297	ILORASERTIB	FALSE	2	FALSE	Reactome	Transcriptional Regulation by TP53	9	0	2	6	1	0	50.9
AURKB	ENSG00000178999	aurora kinase B	240	4	FALSE	TRUE	FALSE	TRUE	FALSE	FALSE	FALSE	FALSE	FALSE	FALSE	FALSE	FALSE	Nucleus	1	18	CHEMBL482968	ENMD-2076	FALSE	2	FALSE	Reactome	SUMO E3 ligases SUMOylate target proteins	9	0	2	6	1	0	50.9
AURKB	ENSG00000178999	aurora kinase B	240	4	FALSE	TRUE	FALSE	TRUE	FALSE	FALSE	FALSE	FALSE	FALSE	FALSE	FALSE	FALSE	Nucleus	1	18	CHEMBL3545395	BI-811283	FALSE	2	FALSE	Reactome	Regulation of TP53 Activity	9	0	2	6	1	0	50.9
PIK3R2	ENSG00000105647	phosphoinositide-3-kinase regulatory subunit 2	179	2	FALSE	TRUE	FALSE	FALSE	FALSE	FALSE	FALSE	FALSE	FALSE	FALSE	FALSE	FALSE	No data	0	24	CHEMBL1922094	APITOLISIB	FALSE	2	FALSE	KEGG	HIF-1 signaling pathway	2	0	3	8	0	0	49.29
PIK3R2	ENSG00000105647	phosphoinositide-3-kinase regulatory subunit 2	179	2	FALSE	TRUE	FALSE	FALSE	FALSE	FALSE	FALSE	FALSE	FALSE	FALSE	FALSE	FALSE	No data	0	24	CHEMBL2387080	TASELISIB	FALSE	3	FALSE	KEGG	HIF-1 signaling pathway	2	0	3	8	0	0	49.29
PIK3R2	ENSG00000105647	phosphoinositide-3-kinase regulatory subunit 2	179	2	FALSE	TRUE	FALSE	FALSE	FALSE	FALSE	FALSE	FALSE	FALSE	FALSE	FALSE	FALSE	No data	0	24	CHEMBL1879463	DACTOLISIB	FALSE	3	FALSE	KEGG	HIF-1 signaling pathway	2	0	3	8	0	0	49.29
PIK3R2	ENSG00000105647	phosphoinositide-3-kinase regulatory subunit 2	179	2	FALSE	TRUE	FALSE	FALSE	FALSE	FALSE	FALSE	FALSE	FALSE	FALSE	FALSE	FALSE	No data	0	24	CHEMBL2017974	BUPARLISIB	FALSE	3	FALSE	KEGG	HIF-1 signaling pathway	2	0	3	8	0	0	49.29
PIK3R2	ENSG00000105647	phosphoinositide-3-kinase regulatory subunit 2	179	2	FALSE	TRUE	FALSE	FALSE	FALSE	FALSE	FALSE	FALSE	FALSE	FALSE	FALSE	FALSE	No data	0	24	CHEMBL411907	SONOLISIB	FALSE	2	FALSE	KEGG	HIF-1 signaling pathway	2	0	3	8	0	0	49.29
PIK3R2	ENSG00000105647	phosphoinositide-3-kinase regulatory subunit 2	179	2	FALSE	TRUE	FALSE	FALSE	FALSE	FALSE	FALSE	FALSE	FALSE	FALSE	FALSE	FALSE	No data	0	24	CHEMBL2017974	BUPARLISIB	FALSE	3	FALSE	KEGG	HIF-1 signaling pathway	2	0	3	8	0	0	49.29
PIK3R2	ENSG00000105647	phosphoinositide-3-kinase regulatory subunit 2	179	2	FALSE	TRUE	FALSE	FALSE	FALSE	FALSE	FALSE	FALSE	FALSE	FALSE	FALSE	FALSE	No data	0	24	CHEMBL3545366	VOXTALISIB	FALSE	2	FALSE	Reactome	Cytokine Signaling in Immune system	2	0	3	8	0	0	49.29
PIK3R2	ENSG00000105647	phosphoinositide-3-kinase regulatory subunit 2	179	2	FALSE	TRUE	FALSE	FALSE	FALSE	FALSE	FALSE	FALSE	FALSE	FALSE	FALSE	FALSE	No data	0	24	CHEMBL592445	GEDATOLISIB	FALSE	2	FALSE	Reactome	Cytokine Signaling in Immune system	2	0	3	8	0	0	49.29
PIK3R2	ENSG00000105647	phosphoinositide-3-kinase regulatory subunit 2	179	2	FALSE	TRUE	FALSE	FALSE	FALSE	FALSE	FALSE	FALSE	FALSE	FALSE	FALSE	FALSE	No data	0	24	CHEMBL2017974	BUPARLISIB	FALSE	3	FALSE	KEGG	HIF-1 signaling pathway	2	0	3	8	0	0	49.29
PIK3R2	ENSG00000105647	phosphoinositide-3-kinase regulatory subunit 2	179	2	FALSE	TRUE	FALSE	FALSE	FALSE	FALSE	FALSE	FALSE	FALSE	FALSE	FALSE	FALSE	No data	0	24	CHEMBL2017974	BUPARLISIB	FALSE	3	FALSE	KEGG	HIF-1 signaling pathway	2	0	3	8	0	0	49.29
PIK3R2	ENSG00000105647	phosphoinositide-3-kinase regulatory subunit 2	179	2	FALSE	TRUE	FALSE	FALSE	FALSE	FALSE	FALSE	FALSE	FALSE	FALSE	FALSE	FALSE	No data	0	24	CHEMBL1879463	DACTOLISIB	FALSE	3	FALSE	Reactome	Cytokine Signaling in Immune system	2	0	3	8	0	0	49.29
PIK3R2	ENSG00000105647	phosphoinositide-3-kinase regulatory subunit 2	179	2	FALSE	TRUE	FALSE	FALSE	FALSE	FALSE	FALSE	FALSE	FALSE	FALSE	FALSE	FALSE	No data	0	24	CHEMBL4297181	SAMOTOLISIB	FALSE	2	FALSE	KEGG	HIF-1 signaling pathway	2	0	3	8	0	0	49.29
PIK3R2	ENSG00000105647	phosphoinositide-3-kinase regulatory subunit 2	179	2	FALSE	TRUE	FALSE	FALSE	FALSE	FALSE	FALSE	FALSE	FALSE	FALSE	FALSE	FALSE	No data	0	24	CHEMBL592445	GEDATOLISIB	FALSE	2	FALSE	KEGG	HIF-1 signaling pathway	2	0	3	8	0	0	49.29
PIK3R2	ENSG00000105647	phosphoinositide-3-kinase regulatory subunit 2	179	2	FALSE	TRUE	FALSE	FALSE	FALSE	FALSE	FALSE	FALSE	FALSE	FALSE	FALSE	FALSE	No data	0	24	CHEMBL4297181	SAMOTOLISIB	FALSE	2	FALSE	Reactome	Cytokine Signaling in Immune system	2	0	3	8	0	0	49.29
PIK3R2	ENSG00000105647	phosphoinositide-3-kinase regulatory subunit 2	179	2	FALSE	TRUE	FALSE	FALSE	FALSE	FALSE	FALSE	FALSE	FALSE	FALSE	FALSE	FALSE	No data	0	24	CHEMBL1922094	APITOLISIB	FALSE	2	FALSE	Reactome	Cytokine Signaling in Immune system	2	0	3	8	0	0	49.29
PIK3R2	ENSG00000105647	phosphoinositide-3-kinase regulatory subunit 2	179	2	FALSE	TRUE	FALSE	FALSE	FALSE	FALSE	FALSE	FALSE	FALSE	FALSE	FALSE	FALSE	No data	0	24	CHEMBL2017974	BUPARLISIB	FALSE	3	FALSE	Reactome	Cytokine Signaling in Immune system	2	0	3	8	0	0	49.29
PIK3R2	ENSG00000105647	phosphoinositide-3-kinase regulatory subunit 2	179	2	FALSE	TRUE	FALSE	FALSE	FALSE	FALSE	FALSE	FALSE	FALSE	FALSE	FALSE	FALSE	No data	0	24	CHEMBL2017974	BUPARLISIB	FALSE	3	FALSE	Reactome	Cytokine Signaling in Immune system	2	0	3	8	0	0	49.29
PIK3R2	ENSG00000105647	phosphoinositide-3-kinase regulatory subunit 2	179	2	FALSE	TRUE	FALSE	FALSE	FALSE	FALSE	FALSE	FALSE	FALSE	FALSE	FALSE	FALSE	No data	0	24	CHEMBL3813842	PAXALISIB	FALSE	2	FALSE	Reactome	Cytokine Signaling in Immune system	2	0	3	8	0	0	49.29
PIK3R2	ENSG00000105647	phosphoinositide-3-kinase regulatory subunit 2	179	2	FALSE	TRUE	FALSE	FALSE	FALSE	FALSE	FALSE	FALSE	FALSE	FALSE	FALSE	FALSE	No data	0	24	CHEMBL1879463	DACTOLISIB	FALSE	3	FALSE	KEGG	HIF-1 signaling pathway	2	0	3	8	0	0	49.29
PIK3R2	ENSG00000105647	phosphoinositide-3-kinase regulatory subunit 2	179	2	FALSE	TRUE	FALSE	FALSE	FALSE	FALSE	FALSE	FALSE	FALSE	FALSE	FALSE	FALSE	No data	0	24	CHEMBL2017974	BUPARLISIB	FALSE	3	FALSE	Reactome	Cytokine Signaling in Immune system	2	0	3	8	0	0	49.29
PIK3R2	ENSG00000105647	phosphoinositide-3-kinase regulatory subunit 2	179	2	FALSE	TRUE	FALSE	FALSE	FALSE	FALSE	FALSE	FALSE	FALSE	FALSE	FALSE	FALSE	No data	0	24	CHEMBL3813842	PAXALISIB	FALSE	2	FALSE	KEGG	HIF-1 signaling pathway	2	0	3	8	0	0	49.29
PIK3R2	ENSG00000105647	phosphoinositide-3-kinase regulatory subunit 2	179	2	FALSE	TRUE	FALSE	FALSE	FALSE	FALSE	FALSE	FALSE	FALSE	FALSE	FALSE	FALSE	No data	0	24	CHEMBL1234354	PF-04691502	FALSE	2	FALSE	Reactome	Cytokine Signaling in Immune system	2	0	3	8	0	0	49.29
PIK3R2	ENSG00000105647	phosphoinositide-3-kinase regulatory subunit 2	179	2	FALSE	TRUE	FALSE	FALSE	FALSE	FALSE	FALSE	FALSE	FALSE	FALSE	FALSE	FALSE	No data	0	24	CHEMBL1879463	DACTOLISIB	FALSE	3	FALSE	Reactome	Cytokine Signaling in Immune system	2	0	3	8	0	0	49.29
PIK3R2	ENSG00000105647	phosphoinositide-3-kinase regulatory subunit 2	179	2	FALSE	TRUE	FALSE	FALSE	FALSE	FALSE	FALSE	FALSE	FALSE	FALSE	FALSE	FALSE	No data	0	24	CHEMBL2017974	BUPARLISIB	FALSE	3	FALSE	Reactome	Cytokine Signaling in Immune system	2	0	3	8	0	0	49.29
PIK3R2	ENSG00000105647	phosphoinositide-3-kinase regulatory subunit 2	179	2	FALSE	TRUE	FALSE	FALSE	FALSE	FALSE	FALSE	FALSE	FALSE	FALSE	FALSE	FALSE	No data	0	24	CHEMBL1879463	DACTOLISIB	FALSE	3	FALSE	Reactome	Cytokine Signaling in Immune system	2	0	3	8	0	0	49.29
PIK3R2	ENSG00000105647	phosphoinositide-3-kinase regulatory subunit 2	179	2	FALSE	TRUE	FALSE	FALSE	FALSE	FALSE	FALSE	FALSE	FALSE	FALSE	FALSE	FALSE	No data	0	24	CHEMBL592445	GEDATOLISIB	FALSE	2	FALSE	KEGG	HIF-1 signaling pathway	2	0	3	8	0	0	49.29
PIK3R2	ENSG00000105647	phosphoinositide-3-kinase regulatory subunit 2	179	2	FALSE	TRUE	FALSE	FALSE	FALSE	FALSE	FALSE	FALSE	FALSE	FALSE	FALSE	FALSE	No data	0	24	CHEMBL3545366	VOXTALISIB	FALSE	2	FALSE	KEGG	HIF-1 signaling pathway	2	0	3	8	0	0	49.29
PIK3R2	ENSG00000105647	phosphoinositide-3-kinase regulatory subunit 2	179	2	FALSE	TRUE	FALSE	FALSE	FALSE	FALSE	FALSE	FALSE	FALSE	FALSE	FALSE	FALSE	No data	0	24	CHEMBL2017974	BUPARLISIB	FALSE	3	FALSE	Reactome	Cytokine Signaling in Immune system	2	0	3	8	0	0	49.29
PIK3R2	ENSG00000105647	phosphoinositide-3-kinase regulatory subunit 2	179	2	FALSE	TRUE	FALSE	FALSE	FALSE	FALSE	FALSE	FALSE	FALSE	FALSE	FALSE	FALSE	No data	0	24	CHEMBL1879463	DACTOLISIB	FALSE	3	FALSE	KEGG	HIF-1 signaling pathway	2	0	3	8	0	0	49.29
PIK3R2	ENSG00000105647	phosphoinositide-3-kinase regulatory subunit 2	179	2	FALSE	TRUE	FALSE	FALSE	FALSE	FALSE	FALSE	FALSE	FALSE	FALSE	FALSE	FALSE	No data	0	24	CHEMBL1879463	DACTOLISIB	FALSE	3	FALSE	KEGG	HIF-1 signaling pathway	2	0	3	8	0	0	49.29
PIK3R2	ENSG00000105647	phosphoinositide-3-kinase regulatory subunit 2	179	2	FALSE	TRUE	FALSE	FALSE	FALSE	FALSE	FALSE	FALSE	FALSE	FALSE	FALSE	FALSE	No data	0	24	CHEMBL2017974	BUPARLISIB	FALSE	3	FALSE	KEGG	HIF-1 signaling pathway	2	0	3	8	0	0	49.29
PIK3R2	ENSG00000105647	phosphoinositide-3-kinase regulatory subunit 2	179	2	FALSE	TRUE	FALSE	FALSE	FALSE	FALSE	FALSE	FALSE	FALSE	FALSE	FALSE	FALSE	No data	0	24	CHEMBL1879463	DACTOLISIB	FALSE	3	FALSE	Reactome	Cytokine Signaling in Immune system	2	0	3	8	0	0	49.29
PIK3R2	ENSG00000105647	phosphoinositide-3-kinase regulatory subunit 2	179	2	FALSE	TRUE	FALSE	FALSE	FALSE	FALSE	FALSE	FALSE	FALSE	FALSE	FALSE	FALSE	No data	0	24	CHEMBL1234354	PF-04691502	FALSE	2	FALSE	KEGG	HIF-1 signaling pathway	2	0	3	8	0	0	49.29
PIK3R2	ENSG00000105647	phosphoinositide-3-kinase regulatory subunit 2	179	2	FALSE	TRUE	FALSE	FALSE	FALSE	FALSE	FALSE	FALSE	FALSE	FALSE	FALSE	FALSE	No data	0	24	CHEMBL1879463	DACTOLISIB	FALSE	3	FALSE	Reactome	Cytokine Signaling in Immune system	2	0	3	8	0	0	49.29
PIK3R2	ENSG00000105647	phosphoinositide-3-kinase regulatory subunit 2	179	2	FALSE	TRUE	FALSE	FALSE	FALSE	FALSE	FALSE	FALSE	FALSE	FALSE	FALSE	FALSE	No data	0	24	CHEMBL411907	SONOLISIB	FALSE	2	FALSE	Reactome	Cytokine Signaling in Immune system	2	0	3	8	0	0	49.29
PIK3R2	ENSG00000105647	phosphoinositide-3-kinase regulatory subunit 2	179	2	FALSE	TRUE	FALSE	FALSE	FALSE	FALSE	FALSE	FALSE	FALSE	FALSE	FALSE	FALSE	No data	0	24	CHEMBL2017974	BUPARLISIB	FALSE	3	FALSE	Reactome	Cytokine Signaling in Immune system	2	0	3	8	0	0	49.29
PIK3R2	ENSG00000105647	phosphoinositide-3-kinase regulatory subunit 2	179	2	FALSE	TRUE	FALSE	FALSE	FALSE	FALSE	FALSE	FALSE	FALSE	FALSE	FALSE	FALSE	No data	0	24	CHEMBL1879463	DACTOLISIB	FALSE	3	FALSE	Reactome	Cytokine Signaling in Immune system	2	0	3	8	0	0	49.29
PIK3R2	ENSG00000105647	phosphoinositide-3-kinase regulatory subunit 2	179	2	FALSE	TRUE	FALSE	FALSE	FALSE	FALSE	FALSE	FALSE	FALSE	FALSE	FALSE	FALSE	No data	0	24	CHEMBL2017974	BUPARLISIB	FALSE	3	FALSE	KEGG	HIF-1 signaling pathway	2	0	3	8	0	0	49.29
PIK3R2	ENSG00000105647	phosphoinositide-3-kinase regulatory subunit 2	179	2	FALSE	TRUE	FALSE	FALSE	FALSE	FALSE	FALSE	FALSE	FALSE	FALSE	FALSE	FALSE	No data	0	24	CHEMBL2387080	TASELISIB	FALSE	3	FALSE	KEGG	HIF-1 signaling pathway	2	0	3	8	0	0	49.29
PIK3R2	ENSG00000105647	phosphoinositide-3-kinase regulatory subunit 2	179	2	FALSE	TRUE	FALSE	FALSE	FALSE	FALSE	FALSE	FALSE	FALSE	FALSE	FALSE	FALSE	No data	0	24	CHEMBL1879463	DACTOLISIB	FALSE	3	FALSE	KEGG	HIF-1 signaling pathway	2	0	3	8	0	0	49.29
PIK3R2	ENSG00000105647	phosphoinositide-3-kinase regulatory subunit 2	179	2	FALSE	TRUE	FALSE	FALSE	FALSE	FALSE	FALSE	FALSE	FALSE	FALSE	FALSE	FALSE	No data	0	24	CHEMBL521851	PICTILISIB	FALSE	2	FALSE	Reactome	Cytokine Signaling in Immune system	2	0	3	8	0	0	49.29
PIK3R2	ENSG00000105647	phosphoinositide-3-kinase regulatory subunit 2	179	2	FALSE	TRUE	FALSE	FALSE	FALSE	FALSE	FALSE	FALSE	FALSE	FALSE	FALSE	FALSE	No data	0	24	CHEMBL2387080	TASELISIB	FALSE	3	FALSE	Reactome	Cytokine Signaling in Immune system	2	0	3	8	0	0	49.29
PIK3R2	ENSG00000105647	phosphoinositide-3-kinase regulatory subunit 2	179	2	FALSE	TRUE	FALSE	FALSE	FALSE	FALSE	FALSE	FALSE	FALSE	FALSE	FALSE	FALSE	No data	0	24	CHEMBL592445	GEDATOLISIB	FALSE	2	FALSE	Reactome	Cytokine Signaling in Immune system	2	0	3	8	0	0	49.29
PIK3R2	ENSG00000105647	phosphoinositide-3-kinase regulatory subunit 2	179	2	FALSE	TRUE	FALSE	FALSE	FALSE	FALSE	FALSE	FALSE	FALSE	FALSE	FALSE	FALSE	No data	0	24	CHEMBL1879463	DACTOLISIB	FALSE	3	FALSE	Reactome	Cytokine Signaling in Immune system	2	0	3	8	0	0	49.29
PIK3R2	ENSG00000105647	phosphoinositide-3-kinase regulatory subunit 2	179	2	FALSE	TRUE	FALSE	FALSE	FALSE	FALSE	FALSE	FALSE	FALSE	FALSE	FALSE	FALSE	No data	0	24	CHEMBL2387080	TASELISIB	FALSE	3	FALSE	Reactome	Cytokine Signaling in Immune system	2	0	3	8	0	0	49.29
PIK3R2	ENSG00000105647	phosphoinositide-3-kinase regulatory subunit 2	179	2	FALSE	TRUE	FALSE	FALSE	FALSE	FALSE	FALSE	FALSE	FALSE	FALSE	FALSE	FALSE	No data	0	24	CHEMBL1879463	DACTOLISIB	FALSE	3	FALSE	KEGG	HIF-1 signaling pathway	2	0	3	8	0	0	49.29
PIK3R2	ENSG00000105647	phosphoinositide-3-kinase regulatory subunit 2	179	2	FALSE	TRUE	FALSE	FALSE	FALSE	FALSE	FALSE	FALSE	FALSE	FALSE	FALSE	FALSE	No data	0	24	CHEMBL1879463	DACTOLISIB	FALSE	3	FALSE	KEGG	HIF-1 signaling pathway	2	0	3	8	0	0	49.29
PIK3R2	ENSG00000105647	phosphoinositide-3-kinase regulatory subunit 2	179	2	FALSE	TRUE	FALSE	FALSE	FALSE	FALSE	FALSE	FALSE	FALSE	FALSE	FALSE	FALSE	No data	0	24	CHEMBL3813842	PAXALISIB	FALSE	2	FALSE	Reactome	Cytokine Signaling in Immune system	2	0	3	8	0	0	49.29
PIK3R2	ENSG00000105647	phosphoinositide-3-kinase regulatory subunit 2	179	2	FALSE	TRUE	FALSE	FALSE	FALSE	FALSE	FALSE	FALSE	FALSE	FALSE	FALSE	FALSE	No data	0	24	CHEMBL521851	PICTILISIB	FALSE	2	FALSE	KEGG	HIF-1 signaling pathway	2	0	3	8	0	0	49.29
PIK3R2	ENSG00000105647	phosphoinositide-3-kinase regulatory subunit 2	179	2	FALSE	TRUE	FALSE	FALSE	FALSE	FALSE	FALSE	FALSE	FALSE	FALSE	FALSE	FALSE	No data	0	24	CHEMBL3813842	PAXALISIB	FALSE	2	FALSE	KEGG	HIF-1 signaling pathway	2	0	3	8	0	0	49.29
CD40	ENSG00000101017	CD40 molecule	713	1	FALSE	FALSE	FALSE	FALSE	FALSE	TRUE	FALSE	FALSE	FALSE	FALSE	TRUE	FALSE	[Isoform I]: Cell membrane	1	9	CHEMBL3990028	BLESELUMAB	FALSE	2	FALSE	Reactome	Cytokine Signaling in Immune system	1	0	0	7	1	0	48.63
CD40	ENSG00000101017	CD40 molecule	713	1	FALSE	FALSE	FALSE	FALSE	FALSE	TRUE	FALSE	FALSE	FALSE	FALSE	TRUE	FALSE	[Isoform I]: Cell membrane	1	9	CHEMBL4298210	ISCALIMAB	FALSE	2	FALSE	Reactome	Cytokine Signaling in Immune system	1	0	0	7	1	0	48.63
CD40	ENSG00000101017	CD40 molecule	713	1	FALSE	FALSE	FALSE	FALSE	FALSE	TRUE	FALSE	FALSE	FALSE	FALSE	TRUE	FALSE	[Isoform I]: Cell membrane	1	9	CHEMBL1743038	LUCATUMUMAB	FALSE	2	FALSE	Reactome	Cytokine Signaling in Immune system	1	0	0	7	1	0	48.63
CD40	ENSG00000101017	CD40 molecule	713	1	FALSE	FALSE	FALSE	FALSE	FALSE	TRUE	FALSE	FALSE	FALSE	FALSE	TRUE	FALSE	[Isoform I]: Cell membrane	1	9	CHEMBL4298210	ISCALIMAB	FALSE	2	FALSE	Reactome	Cytokine Signaling in Immune system	1	0	0	7	1	0	48.63
CD40	ENSG00000101017	CD40 molecule	713	1	FALSE	FALSE	FALSE	FALSE	FALSE	TRUE	FALSE	FALSE	FALSE	FALSE	TRUE	FALSE	[Isoform I]: Cell membrane	1	9	CHEMBL4298210	ISCALIMAB	FALSE	2	FALSE	Reactome	Cytokine Signaling in Immune system	1	0	0	7	1	0	48.63
CD40	ENSG00000101017	CD40 molecule	713	1	FALSE	FALSE	FALSE	FALSE	FALSE	TRUE	FALSE	FALSE	FALSE	FALSE	TRUE	FALSE	[Isoform I]: Cell membrane	1	9	CHEMBL4297888	SOTIGALIMAB	FALSE	2	FALSE	Reactome	Cytokine Signaling in Immune system	1	0	0	7	1	0	48.63
CD40	ENSG00000101017	CD40 molecule	713	1	FALSE	FALSE	FALSE	FALSE	FALSE	TRUE	FALSE	FALSE	FALSE	FALSE	TRUE	FALSE	[Isoform I]: Cell membrane	1	9	CHEMBL4298210	ISCALIMAB	FALSE	2	FALSE	Reactome	Cytokine Signaling in Immune system	1	0	0	7	1	0	48.63
CD40	ENSG00000101017	CD40 molecule	713	1	FALSE	FALSE	FALSE	FALSE	FALSE	TRUE	FALSE	FALSE	FALSE	FALSE	TRUE	FALSE	[Isoform I]: Cell membrane	1	9	CHEMBL1743005	DACETUZUMAB	FALSE	2	FALSE	Reactome	Cytokine Signaling in Immune system	1	0	0	7	1	0	48.63
CD40	ENSG00000101017	CD40 molecule	713	1	FALSE	FALSE	FALSE	FALSE	FALSE	TRUE	FALSE	FALSE	FALSE	FALSE	TRUE	FALSE	[Isoform I]: Cell membrane	1	9	CHEMBL4297888	SOTIGALIMAB	FALSE	2	FALSE	Reactome	Cytokine Signaling in Immune system	1	0	0	7	1	0	48.63
CD40	ENSG00000101017	CD40 molecule	713	1	FALSE	FALSE	FALSE	FALSE	FALSE	TRUE	FALSE	FALSE	FALSE	FALSE	TRUE	FALSE	[Isoform I]: Cell membrane	1	9	CHEMBL4297888	SOTIGALIMAB	FALSE	2	FALSE	Reactome	Cytokine Signaling in Immune system	1	0	0	7	1	0	48.63
CD40	ENSG00000101017	CD40 molecule	713	1	FALSE	FALSE	FALSE	FALSE	FALSE	TRUE	FALSE	FALSE	FALSE	FALSE	TRUE	FALSE	[Isoform I]: Cell membrane	1	9	CHEMBL4298210	ISCALIMAB	FALSE	2	FALSE	Reactome	Cytokine Signaling in Immune system	1	0	0	7	1	0	48.63
CD40	ENSG00000101017	CD40 molecule	713	1	FALSE	FALSE	FALSE	FALSE	FALSE	TRUE	FALSE	FALSE	FALSE	FALSE	TRUE	FALSE	[Isoform I]: Cell membrane	1	9	CHEMBL4298210	ISCALIMAB	FALSE	2	FALSE	Reactome	Cytokine Signaling in Immune system	1	0	0	7	1	0	48.63
CD40	ENSG00000101017	CD40 molecule	713	1	FALSE	FALSE	FALSE	FALSE	FALSE	TRUE	FALSE	FALSE	FALSE	FALSE	TRUE	FALSE	[Isoform I]: Cell membrane	1	9	CHEMBL4298210	ISCALIMAB	FALSE	2	FALSE	Reactome	Cytokine Signaling in Immune system	1	0	0	7	1	0	48.63
CD40	ENSG00000101017	CD40 molecule	713	1	FALSE	FALSE	FALSE	FALSE	FALSE	TRUE	FALSE	FALSE	FALSE	FALSE	TRUE	FALSE	[Isoform I]: Cell membrane	1	9	CHEMBL4298210	ISCALIMAB	FALSE	2	FALSE	Reactome	Cytokine Signaling in Immune system	1	0	0	7	1	0	48.63
CD40	ENSG00000101017	CD40 molecule	713	1	FALSE	FALSE	FALSE	FALSE	FALSE	TRUE	FALSE	FALSE	FALSE	FALSE	TRUE	FALSE	[Isoform I]: Cell membrane	1	9	CHEMBL2109477	SELICRELUMAB	FALSE	1	FALSE	Reactome	Cytokine Signaling in Immune system	1	0	0	7	1	0	48.63
CD40	ENSG00000101017	CD40 molecule	713	1	FALSE	FALSE	FALSE	FALSE	FALSE	TRUE	FALSE	FALSE	FALSE	FALSE	TRUE	FALSE	[Isoform I]: Cell membrane	1	9	CHEMBL4297718	CD40 LIGAND	FALSE	2	FALSE	Reactome	Cytokine Signaling in Immune system	1	0	0	7	1	0	48.63
CD40	ENSG00000101017	CD40 molecule	713	1	FALSE	FALSE	FALSE	FALSE	FALSE	TRUE	FALSE	FALSE	FALSE	FALSE	TRUE	FALSE	[Isoform I]: Cell membrane	1	9	CHEMBL4297888	SOTIGALIMAB	FALSE	2	FALSE	Reactome	Cytokine Signaling in Immune system	1	0	0	7	1	0	48.63
CD40	ENSG00000101017	CD40 molecule	713	1	FALSE	FALSE	FALSE	FALSE	FALSE	TRUE	FALSE	FALSE	FALSE	FALSE	TRUE	FALSE	[Isoform I]: Cell membrane	1	9	CHEMBL4297721	CDX-1140	FALSE	2	FALSE	Reactome	Cytokine Signaling in Immune system	1	0	0	7	1	0	48.63
CD40	ENSG00000101017	CD40 molecule	713	1	FALSE	FALSE	FALSE	FALSE	FALSE	TRUE	FALSE	FALSE	FALSE	FALSE	TRUE	FALSE	[Isoform I]: Cell membrane	1	9	CHEMBL4298210	ISCALIMAB	FALSE	2	FALSE	Reactome	Cytokine Signaling in Immune system	1	0	0	7	1	0	48.63
CD40	ENSG00000101017	CD40 molecule	713	1	FALSE	FALSE	FALSE	FALSE	FALSE	TRUE	FALSE	FALSE	FALSE	FALSE	TRUE	FALSE	[Isoform I]: Cell membrane	1	9	CHEMBL4297888	SOTIGALIMAB	FALSE	2	FALSE	Reactome	Cytokine Signaling in Immune system	1	0	0	7	1	0	48.63
CD40	ENSG00000101017	CD40 molecule	713	1	FALSE	FALSE	FALSE	FALSE	FALSE	TRUE	FALSE	FALSE	FALSE	FALSE	TRUE	FALSE	[Isoform I]: Cell membrane	1	9	CHEMBL1743005	DACETUZUMAB	FALSE	2	FALSE	Reactome	Cytokine Signaling in Immune system	1	0	0	7	1	0	48.63
CD40	ENSG00000101017	CD40 molecule	713	1	FALSE	FALSE	FALSE	FALSE	FALSE	TRUE	FALSE	FALSE	FALSE	FALSE	TRUE	FALSE	[Isoform I]: Cell membrane	1	9	CHEMBL1743005	DACETUZUMAB	FALSE	2	FALSE	Reactome	Cytokine Signaling in Immune system	1	0	0	7	1	0	48.63
CD40	ENSG00000101017	CD40 molecule	713	1	FALSE	FALSE	FALSE	FALSE	FALSE	TRUE	FALSE	FALSE	FALSE	FALSE	TRUE	FALSE	[Isoform I]: Cell membrane	1	9	CHEMBL4298210	ISCALIMAB	FALSE	2	FALSE	Reactome	Cytokine Signaling in Immune system	1	0	0	7	1	0	48.63
CD40	ENSG00000101017	CD40 molecule	713	1	FALSE	FALSE	FALSE	FALSE	FALSE	TRUE	FALSE	FALSE	FALSE	FALSE	TRUE	FALSE	[Isoform I]: Cell membrane	1	9	CHEMBL3990028	BLESELUMAB	FALSE	2	FALSE	Reactome	Cytokine Signaling in Immune system	1	0	0	7	1	0	48.63
CD40	ENSG00000101017	CD40 molecule	713	1	FALSE	FALSE	FALSE	FALSE	FALSE	TRUE	FALSE	FALSE	FALSE	FALSE	TRUE	FALSE	[Isoform I]: Cell membrane	1	9	CHEMBL4297721	CDX-1140	FALSE	2	FALSE	Reactome	Cytokine Signaling in Immune system	1	0	0	7	1	0	48.63
MAPK3	ENSG00000102882	mitogen-activated protein kinase 3	810	4	FALSE	TRUE	FALSE	TRUE	FALSE	FALSE	FALSE	FALSE	FALSE	FALSE	FALSE	FALSE	Cytoplasm	2	5	CHEMBL3590106	ULIXERTINIB	FALSE	2	FALSE	Reactome	Cytokine Signaling in Immune system	4	0	0	2	3	0	48.6
MAPK3	ENSG00000102882	mitogen-activated protein kinase 3	810	4	FALSE	TRUE	FALSE	TRUE	FALSE	FALSE	FALSE	FALSE	FALSE	FALSE	FALSE	FALSE	Cytoplasm	2	5	CHEMBL4650285	TEMUTERKIB	FALSE	2	FALSE	Reactome	Cytokine Signaling in Immune system	4	0	0	2	3	0	48.6
MAPK3	ENSG00000102882	mitogen-activated protein kinase 3	810	4	FALSE	TRUE	FALSE	TRUE	FALSE	FALSE	FALSE	FALSE	FALSE	FALSE	FALSE	FALSE	Cytoplasm	2	5	CHEMBL3545001	MK-8353	FALSE	1	FALSE	Reactome	ISG15 antiviral mechanism	4	0	0	2	3	0	48.6
MAPK3	ENSG00000102882	mitogen-activated protein kinase 3	810	4	FALSE	TRUE	FALSE	TRUE	FALSE	FALSE	FALSE	FALSE	FALSE	FALSE	FALSE	FALSE	Cytoplasm	2	5	CHEMBL4650285	TEMUTERKIB	FALSE	2	FALSE	KEGG	HIF-1 signaling pathway	4	0	0	2	3	0	48.6
MAPK3	ENSG00000102882	mitogen-activated protein kinase 3	810	4	FALSE	TRUE	FALSE	TRUE	FALSE	FALSE	FALSE	FALSE	FALSE	FALSE	FALSE	FALSE	Cytoplasm	2	5	CHEMBL4650285	TEMUTERKIB	FALSE	2	FALSE	Reactome	ISG15 antiviral mechanism	4	0	0	2	3	0	48.6
MAPK3	ENSG00000102882	mitogen-activated protein kinase 3	810	4	FALSE	TRUE	FALSE	TRUE	FALSE	FALSE	FALSE	FALSE	FALSE	FALSE	FALSE	FALSE	Cytoplasm	2	5	CHEMBL3590106	ULIXERTINIB	FALSE	2	FALSE	Reactome	Cytokine Signaling in Immune system	4	0	0	2	3	0	48.6
MAPK3	ENSG00000102882	mitogen-activated protein kinase 3	810	4	FALSE	TRUE	FALSE	TRUE	FALSE	FALSE	FALSE	FALSE	FALSE	FALSE	FALSE	FALSE	Cytoplasm	2	5	CHEMBL3590106	ULIXERTINIB	FALSE	2	FALSE	Reactome	ISG15 antiviral mechanism	4	0	0	2	3	0	48.6
MAPK3	ENSG00000102882	mitogen-activated protein kinase 3	810	4	FALSE	TRUE	FALSE	TRUE	FALSE	FALSE	FALSE	FALSE	FALSE	FALSE	FALSE	FALSE	Cytoplasm	2	5	CHEMBL3544964	RAVOXERTINIB	FALSE	1	FALSE	Reactome	Cytokine Signaling in Immune system	4	0	0	2	3	0	48.6
MAPK3	ENSG00000102882	mitogen-activated protein kinase 3	810	4	FALSE	TRUE	FALSE	TRUE	FALSE	FALSE	FALSE	FALSE	FALSE	FALSE	FALSE	FALSE	Cytoplasm	2	5	CHEMBL4650285	TEMUTERKIB	FALSE	2	FALSE	Reactome	ISG15 antiviral mechanism	4	0	0	2	3	0	48.6
MAPK3	ENSG00000102882	mitogen-activated protein kinase 3	810	4	FALSE	TRUE	FALSE	TRUE	FALSE	FALSE	FALSE	FALSE	FALSE	FALSE	FALSE	FALSE	Cytoplasm	2	5	CHEMBL3590106	ULIXERTINIB	FALSE	2	FALSE	Reactome	ISG15 antiviral mechanism	4	0	0	2	3	0	48.6
MAPK3	ENSG00000102882	mitogen-activated protein kinase 3	810	4	FALSE	TRUE	FALSE	TRUE	FALSE	FALSE	FALSE	FALSE	FALSE	FALSE	FALSE	FALSE	Cytoplasm	2	5	CHEMBL4650285	TEMUTERKIB	FALSE	2	FALSE	KEGG	HIF-1 signaling pathway	4	0	0	2	3	0	48.6
MAPK3	ENSG00000102882	mitogen-activated protein kinase 3	810	4	FALSE	TRUE	FALSE	TRUE	FALSE	FALSE	FALSE	FALSE	FALSE	FALSE	FALSE	FALSE	Cytoplasm	2	5	CHEMBL3545001	MK-8353	FALSE	1	FALSE	Reactome	ISG15 antiviral mechanism	4	0	0	2	3	0	48.6
MAPK3	ENSG00000102882	mitogen-activated protein kinase 3	810	4	FALSE	TRUE	FALSE	TRUE	FALSE	FALSE	FALSE	FALSE	FALSE	FALSE	FALSE	FALSE	Cytoplasm	2	5	CHEMBL3590106	ULIXERTINIB	FALSE	2	FALSE	Reactome	ISG15 antiviral mechanism	4	0	0	2	3	0	48.6
MAPK3	ENSG00000102882	mitogen-activated protein kinase 3	810	4	FALSE	TRUE	FALSE	TRUE	FALSE	FALSE	FALSE	FALSE	FALSE	FALSE	FALSE	FALSE	Cytoplasm	2	5	CHEMBL3590106	ULIXERTINIB	FALSE	2	FALSE	KEGG	HIF-1 signaling pathway	4	0	0	2	3	0	48.6
MAPK3	ENSG00000102882	mitogen-activated protein kinase 3	810	4	FALSE	TRUE	FALSE	TRUE	FALSE	FALSE	FALSE	FALSE	FALSE	FALSE	FALSE	FALSE	Cytoplasm	2	5	CHEMBL3590106	ULIXERTINIB	FALSE	2	FALSE	Reactome	ISG15 antiviral mechanism	4	0	0	2	3	0	48.6
MAPK3	ENSG00000102882	mitogen-activated protein kinase 3	810	4	FALSE	TRUE	FALSE	TRUE	FALSE	FALSE	FALSE	FALSE	FALSE	FALSE	FALSE	FALSE	Cytoplasm	2	5	CHEMBL3545001	MK-8353	FALSE	1	FALSE	Reactome	ISG15 antiviral mechanism	4	0	0	2	3	0	48.6
MAPK3	ENSG00000102882	mitogen-activated protein kinase 3	810	4	FALSE	TRUE	FALSE	TRUE	FALSE	FALSE	FALSE	FALSE	FALSE	FALSE	FALSE	FALSE	Cytoplasm	2	5	CHEMBL4650285	TEMUTERKIB	FALSE	2	FALSE	Reactome	ISG15 antiviral mechanism	4	0	0	2	3	0	48.6
MAPK3	ENSG00000102882	mitogen-activated protein kinase 3	810	4	FALSE	TRUE	FALSE	TRUE	FALSE	FALSE	FALSE	FALSE	FALSE	FALSE	FALSE	FALSE	Cytoplasm	2	5	CHEMBL4650285	TEMUTERKIB	FALSE	2	FALSE	Reactome	Cytokine Signaling in Immune system	4	0	0	2	3	0	48.6
MAPK3	ENSG00000102882	mitogen-activated protein kinase 3	810	4	FALSE	TRUE	FALSE	TRUE	FALSE	FALSE	FALSE	FALSE	FALSE	FALSE	FALSE	FALSE	Cytoplasm	2	5	CHEMBL3590106	ULIXERTINIB	FALSE	2	FALSE	Reactome	ISG15 antiviral mechanism	4	0	0	2	3	0	48.6
MAPK3	ENSG00000102882	mitogen-activated protein kinase 3	810	4	FALSE	TRUE	FALSE	TRUE	FALSE	FALSE	FALSE	FALSE	FALSE	FALSE	FALSE	FALSE	Cytoplasm	2	5	CHEMBL3590106	ULIXERTINIB	FALSE	2	FALSE	Reactome	Cytokine Signaling in Immune system	4	0	0	2	3	0	48.6
MAPK3	ENSG00000102882	mitogen-activated protein kinase 3	810	4	FALSE	TRUE	FALSE	TRUE	FALSE	FALSE	FALSE	FALSE	FALSE	FALSE	FALSE	FALSE	Cytoplasm	2	5	CHEMBL3590106	ULIXERTINIB	FALSE	2	FALSE	Reactome	ISG15 antiviral mechanism	4	0	0	2	3	0	48.6
MAPK3	ENSG00000102882	mitogen-activated protein kinase 3	810	4	FALSE	TRUE	FALSE	TRUE	FALSE	FALSE	FALSE	FALSE	FALSE	FALSE	FALSE	FALSE	Cytoplasm	2	5	CHEMBL4650284	KO-947	FALSE	1	FALSE	Reactome	ISG15 antiviral mechanism	4	0	0	2	3	0	48.6
MAPK3	ENSG00000102882	mitogen-activated protein kinase 3	810	4	FALSE	TRUE	FALSE	TRUE	FALSE	FALSE	FALSE	FALSE	FALSE	FALSE	FALSE	FALSE	Cytoplasm	2	5	CHEMBL3590106	ULIXERTINIB	FALSE	2	FALSE	Reactome	Interferon Signaling	4	0	0	2	3	0	48.6
MAPK3	ENSG00000102882	mitogen-activated protein kinase 3	810	4	FALSE	TRUE	FALSE	TRUE	FALSE	FALSE	FALSE	FALSE	FALSE	FALSE	FALSE	FALSE	Cytoplasm	2	5	CHEMBL4650285	TEMUTERKIB	FALSE	2	FALSE	KEGG	HIF-1 signaling pathway	4	0	0	2	3	0	48.6
MAPK3	ENSG00000102882	mitogen-activated protein kinase 3	810	4	FALSE	TRUE	FALSE	TRUE	FALSE	FALSE	FALSE	FALSE	FALSE	FALSE	FALSE	FALSE	Cytoplasm	2	5	CHEMBL3544964	RAVOXERTINIB	FALSE	1	FALSE	Reactome	ISG15 antiviral mechanism	4	0	0	2	3	0	48.6
MAPK3	ENSG00000102882	mitogen-activated protein kinase 3	810	4	FALSE	TRUE	FALSE	TRUE	FALSE	FALSE	FALSE	FALSE	FALSE	FALSE	FALSE	FALSE	Cytoplasm	2	5	CHEMBL3590106	ULIXERTINIB	FALSE	2	FALSE	Reactome	ISG15 antiviral mechanism	4	0	0	2	3	0	48.6
MAPK3	ENSG00000102882	mitogen-activated protein kinase 3	810	4	FALSE	TRUE	FALSE	TRUE	FALSE	FALSE	FALSE	FALSE	FALSE	FALSE	FALSE	FALSE	Cytoplasm	2	5	CHEMBL3590106	ULIXERTINIB	FALSE	2	FALSE	Reactome	Interferon Signaling	4	0	0	2	3	0	48.6
MAPK3	ENSG00000102882	mitogen-activated protein kinase 3	810	4	FALSE	TRUE	FALSE	TRUE	FALSE	FALSE	FALSE	FALSE	FALSE	FALSE	FALSE	FALSE	Cytoplasm	2	5	CHEMBL4650285	TEMUTERKIB	FALSE	2	FALSE	Reactome	Interferon Signaling	4	0	0	2	3	0	48.6
MAPK3	ENSG00000102882	mitogen-activated protein kinase 3	810	4	FALSE	TRUE	FALSE	TRUE	FALSE	FALSE	FALSE	FALSE	FALSE	FALSE	FALSE	FALSE	Cytoplasm	2	5	CHEMBL3590106	ULIXERTINIB	FALSE	2	FALSE	Reactome	ISG15 antiviral mechanism	4	0	0	2	3	0	48.6
MAPK3	ENSG00000102882	mitogen-activated protein kinase 3	810	4	FALSE	TRUE	FALSE	TRUE	FALSE	FALSE	FALSE	FALSE	FALSE	FALSE	FALSE	FALSE	Cytoplasm	2	5	CHEMBL3590106	ULIXERTINIB	FALSE	2	FALSE	Reactome	Cytokine Signaling in Immune system	4	0	0	2	3	0	48.6
MAPK3	ENSG00000102882	mitogen-activated protein kinase 3	810	4	FALSE	TRUE	FALSE	TRUE	FALSE	FALSE	FALSE	FALSE	FALSE	FALSE	FALSE	FALSE	Cytoplasm	2	5	CHEMBL4650285	TEMUTERKIB	FALSE	2	FALSE	Reactome	ISG15 antiviral mechanism	4	0	0	2	3	0	48.6
MAPK3	ENSG00000102882	mitogen-activated protein kinase 3	810	4	FALSE	TRUE	FALSE	TRUE	FALSE	FALSE	FALSE	FALSE	FALSE	FALSE	FALSE	FALSE	Cytoplasm	2	5	CHEMBL3590106	ULIXERTINIB	FALSE	2	FALSE	KEGG	HIF-1 signaling pathway	4	0	0	2	3	0	48.6
MAPK3	ENSG00000102882	mitogen-activated protein kinase 3	810	4	FALSE	TRUE	FALSE	TRUE	FALSE	FALSE	FALSE	FALSE	FALSE	FALSE	FALSE	FALSE	Cytoplasm	2	5	CHEMBL3590106	ULIXERTINIB	FALSE	2	FALSE	Reactome	ISG15 antiviral mechanism	4	0	0	2	3	0	48.6
MAPK3	ENSG00000102882	mitogen-activated protein kinase 3	810	4	FALSE	TRUE	FALSE	TRUE	FALSE	FALSE	FALSE	FALSE	FALSE	FALSE	FALSE	FALSE	Cytoplasm	2	5	CHEMBL3590106	ULIXERTINIB	FALSE	2	FALSE	KEGG	HIF-1 signaling pathway	4	0	0	2	3	0	48.6
MAPK3	ENSG00000102882	mitogen-activated protein kinase 3	810	4	FALSE	TRUE	FALSE	TRUE	FALSE	FALSE	FALSE	FALSE	FALSE	FALSE	FALSE	FALSE	Cytoplasm	2	5	CHEMBL3545001	MK-8353	FALSE	1	FALSE	Reactome	Interferon Signaling	4	0	0	2	3	0	48.6
MAPK3	ENSG00000102882	mitogen-activated protein kinase 3	810	4	FALSE	TRUE	FALSE	TRUE	FALSE	FALSE	FALSE	FALSE	FALSE	FALSE	FALSE	FALSE	Cytoplasm	2	5	CHEMBL4650285	TEMUTERKIB	FALSE	2	FALSE	KEGG	HIF-1 signaling pathway	4	0	0	2	3	0	48.6
MAPK3	ENSG00000102882	mitogen-activated protein kinase 3	810	4	FALSE	TRUE	FALSE	TRUE	FALSE	FALSE	FALSE	FALSE	FALSE	FALSE	FALSE	FALSE	Cytoplasm	2	5	CHEMBL3590106	ULIXERTINIB	FALSE	2	FALSE	Reactome	Interferon Signaling	4	0	0	2	3	0	48.6
MAPK3	ENSG00000102882	mitogen-activated protein kinase 3	810	4	FALSE	TRUE	FALSE	TRUE	FALSE	FALSE	FALSE	FALSE	FALSE	FALSE	FALSE	FALSE	Cytoplasm	2	5	CHEMBL3544964	RAVOXERTINIB	FALSE	1	FALSE	Reactome	Interferon Signaling	4	0	0	2	3	0	48.6
MAPK3	ENSG00000102882	mitogen-activated protein kinase 3	810	4	FALSE	TRUE	FALSE	TRUE	FALSE	FALSE	FALSE	FALSE	FALSE	FALSE	FALSE	FALSE	Cytoplasm	2	5	CHEMBL3545001	MK-8353	FALSE	1	FALSE	KEGG	HIF-1 signaling pathway	4	0	0	2	3	0	48.6
MAPK3	ENSG00000102882	mitogen-activated protein kinase 3	810	4	FALSE	TRUE	FALSE	TRUE	FALSE	FALSE	FALSE	FALSE	FALSE	FALSE	FALSE	FALSE	Cytoplasm	2	5	CHEMBL3590106	ULIXERTINIB	FALSE	2	FALSE	Reactome	Interferon Signaling	4	0	0	2	3	0	48.6
MAPK3	ENSG00000102882	mitogen-activated protein kinase 3	810	4	FALSE	TRUE	FALSE	TRUE	FALSE	FALSE	FALSE	FALSE	FALSE	FALSE	FALSE	FALSE	Cytoplasm	2	5	CHEMBL4650285	TEMUTERKIB	FALSE	2	FALSE	Reactome	Interferon Signaling	4	0	0	2	3	0	48.6
MAPK3	ENSG00000102882	mitogen-activated protein kinase 3	810	4	FALSE	TRUE	FALSE	TRUE	FALSE	FALSE	FALSE	FALSE	FALSE	FALSE	FALSE	FALSE	Cytoplasm	2	5	CHEMBL3544964	RAVOXERTINIB	FALSE	1	FALSE	KEGG	HIF-1 signaling pathway	4	0	0	2	3	0	48.6
MAPK3	ENSG00000102882	mitogen-activated protein kinase 3	810	4	FALSE	TRUE	FALSE	TRUE	FALSE	FALSE	FALSE	FALSE	FALSE	FALSE	FALSE	FALSE	Cytoplasm	2	5	CHEMBL4650284	KO-947	FALSE	1	FALSE	Reactome	Cytokine Signaling in Immune system	4	0	0	2	3	0	48.6
MAPK3	ENSG00000102882	mitogen-activated protein kinase 3	810	4	FALSE	TRUE	FALSE	TRUE	FALSE	FALSE	FALSE	FALSE	FALSE	FALSE	FALSE	FALSE	Cytoplasm	2	5	CHEMBL3590106	ULIXERTINIB	FALSE	2	FALSE	Reactome	Cytokine Signaling in Immune system	4	0	0	2	3	0	48.6
MAPK3	ENSG00000102882	mitogen-activated protein kinase 3	810	4	FALSE	TRUE	FALSE	TRUE	FALSE	FALSE	FALSE	FALSE	FALSE	FALSE	FALSE	FALSE	Cytoplasm	2	5	CHEMBL3590106	ULIXERTINIB	FALSE	2	FALSE	Reactome	Interferon Signaling	4	0	0	2	3	0	48.6
MAPK3	ENSG00000102882	mitogen-activated protein kinase 3	810	4	FALSE	TRUE	FALSE	TRUE	FALSE	FALSE	FALSE	FALSE	FALSE	FALSE	FALSE	FALSE	Cytoplasm	2	5	CHEMBL4650285	TEMUTERKIB	FALSE	2	FALSE	Reactome	Cytokine Signaling in Immune system	4	0	0	2	3	0	48.6
MAPK3	ENSG00000102882	mitogen-activated protein kinase 3	810	4	FALSE	TRUE	FALSE	TRUE	FALSE	FALSE	FALSE	FALSE	FALSE	FALSE	FALSE	FALSE	Cytoplasm	2	5	CHEMBL3545001	MK-8353	FALSE	1	FALSE	Reactome	Interferon Signaling	4	0	0	2	3	0	48.6
MAPK3	ENSG00000102882	mitogen-activated protein kinase 3	810	4	FALSE	TRUE	FALSE	TRUE	FALSE	FALSE	FALSE	FALSE	FALSE	FALSE	FALSE	FALSE	Cytoplasm	2	5	CHEMBL3545001	MK-8353	FALSE	1	FALSE	Reactome	Interferon Signaling	4	0	0	2	3	0	48.6
MAPK3	ENSG00000102882	mitogen-activated protein kinase 3	810	4	FALSE	TRUE	FALSE	TRUE	FALSE	FALSE	FALSE	FALSE	FALSE	FALSE	FALSE	FALSE	Cytoplasm	2	5	CHEMBL3590106	ULIXERTINIB	FALSE	2	FALSE	KEGG	HIF-1 signaling pathway	4	0	0	2	3	0	48.6
MAPK3	ENSG00000102882	mitogen-activated protein kinase 3	810	4	FALSE	TRUE	FALSE	TRUE	FALSE	FALSE	FALSE	FALSE	FALSE	FALSE	FALSE	FALSE	Cytoplasm	2	5	CHEMBL4650284	KO-947	FALSE	1	FALSE	Reactome	Interferon Signaling	4	0	0	2	3	0	48.6
MAPK3	ENSG00000102882	mitogen-activated protein kinase 3	810	4	FALSE	TRUE	FALSE	TRUE	FALSE	FALSE	FALSE	FALSE	FALSE	FALSE	FALSE	FALSE	Cytoplasm	2	5	CHEMBL3590106	ULIXERTINIB	FALSE	2	FALSE	KEGG	HIF-1 signaling pathway	4	0	0	2	3	0	48.6
MAPK3	ENSG00000102882	mitogen-activated protein kinase 3	810	4	FALSE	TRUE	FALSE	TRUE	FALSE	FALSE	FALSE	FALSE	FALSE	FALSE	FALSE	FALSE	Cytoplasm	2	5	CHEMBL3545001	MK-8353	FALSE	1	FALSE	KEGG	HIF-1 signaling pathway	4	0	0	2	3	0	48.6
MAPK3	ENSG00000102882	mitogen-activated protein kinase 3	810	4	FALSE	TRUE	FALSE	TRUE	FALSE	FALSE	FALSE	FALSE	FALSE	FALSE	FALSE	FALSE	Cytoplasm	2	5	CHEMBL3590106	ULIXERTINIB	FALSE	2	FALSE	Reactome	Cytokine Signaling in Immune system	4	0	0	2	3	0	48.6
MAPK3	ENSG00000102882	mitogen-activated protein kinase 3	810	4	FALSE	TRUE	FALSE	TRUE	FALSE	FALSE	FALSE	FALSE	FALSE	FALSE	FALSE	FALSE	Cytoplasm	2	5	CHEMBL3590106	ULIXERTINIB	FALSE	2	FALSE	KEGG	HIF-1 signaling pathway	4	0	0	2	3	0	48.6
MAPK3	ENSG00000102882	mitogen-activated protein kinase 3	810	4	FALSE	TRUE	FALSE	TRUE	FALSE	FALSE	FALSE	FALSE	FALSE	FALSE	FALSE	FALSE	Cytoplasm	2	5	CHEMBL4650285	TEMUTERKIB	FALSE	2	FALSE	Reactome	Interferon Signaling	4	0	0	2	3	0	48.6
MAPK3	ENSG00000102882	mitogen-activated protein kinase 3	810	4	FALSE	TRUE	FALSE	TRUE	FALSE	FALSE	FALSE	FALSE	FALSE	FALSE	FALSE	FALSE	Cytoplasm	2	5	CHEMBL3590106	ULIXERTINIB	FALSE	2	FALSE	KEGG	HIF-1 signaling pathway	4	0	0	2	3	0	48.6
MAPK3	ENSG00000102882	mitogen-activated protein kinase 3	810	4	FALSE	TRUE	FALSE	TRUE	FALSE	FALSE	FALSE	FALSE	FALSE	FALSE	FALSE	FALSE	Cytoplasm	2	5	CHEMBL3545001	MK-8353	FALSE	1	FALSE	Reactome	Cytokine Signaling in Immune system	4	0	0	2	3	0	48.6
MAPK3	ENSG00000102882	mitogen-activated protein kinase 3	810	4	FALSE	TRUE	FALSE	TRUE	FALSE	FALSE	FALSE	FALSE	FALSE	FALSE	FALSE	FALSE	Cytoplasm	2	5	CHEMBL3545001	MK-8353	FALSE	1	FALSE	Reactome	Cytokine Signaling in Immune system	4	0	0	2	3	0	48.6
MAPK3	ENSG00000102882	mitogen-activated protein kinase 3	810	4	FALSE	TRUE	FALSE	TRUE	FALSE	FALSE	FALSE	FALSE	FALSE	FALSE	FALSE	FALSE	Cytoplasm	2	5	CHEMBL4650285	TEMUTERKIB	FALSE	2	FALSE	Reactome	ISG15 antiviral mechanism	4	0	0	2	3	0	48.6
MAPK3	ENSG00000102882	mitogen-activated protein kinase 3	810	4	FALSE	TRUE	FALSE	TRUE	FALSE	FALSE	FALSE	FALSE	FALSE	FALSE	FALSE	FALSE	Cytoplasm	2	5	CHEMBL4650285	TEMUTERKIB	FALSE	2	FALSE	KEGG	HIF-1 signaling pathway	4	0	0	2	3	0	48.6
MAPK3	ENSG00000102882	mitogen-activated protein kinase 3	810	4	FALSE	TRUE	FALSE	TRUE	FALSE	FALSE	FALSE	FALSE	FALSE	FALSE	FALSE	FALSE	Cytoplasm	2	5	CHEMBL3545001	MK-8353	FALSE	1	FALSE	KEGG	HIF-1 signaling pathway	4	0	0	2	3	0	48.6
MAPK3	ENSG00000102882	mitogen-activated protein kinase 3	810	4	FALSE	TRUE	FALSE	TRUE	FALSE	FALSE	FALSE	FALSE	FALSE	FALSE	FALSE	FALSE	Cytoplasm	2	5	CHEMBL4650285	TEMUTERKIB	FALSE	2	FALSE	Reactome	Cytokine Signaling in Immune system	4	0	0	2	3	0	48.6
MAPK3	ENSG00000102882	mitogen-activated protein kinase 3	810	4	FALSE	TRUE	FALSE	TRUE	FALSE	FALSE	FALSE	FALSE	FALSE	FALSE	FALSE	FALSE	Cytoplasm	2	5	CHEMBL3590106	ULIXERTINIB	FALSE	2	FALSE	KEGG	HIF-1 signaling pathway	4	0	0	2	3	0	48.6
MAPK3	ENSG00000102882	mitogen-activated protein kinase 3	810	4	FALSE	TRUE	FALSE	TRUE	FALSE	FALSE	FALSE	FALSE	FALSE	FALSE	FALSE	FALSE	Cytoplasm	2	5	CHEMBL3590106	ULIXERTINIB	FALSE	2	FALSE	KEGG	HIF-1 signaling pathway	4	0	0	2	3	0	48.6
MAPK3	ENSG00000102882	mitogen-activated protein kinase 3	810	4	FALSE	TRUE	FALSE	TRUE	FALSE	FALSE	FALSE	FALSE	FALSE	FALSE	FALSE	FALSE	Cytoplasm	2	5	CHEMBL4650285	TEMUTERKIB	FALSE	2	FALSE	Reactome	Interferon Signaling	4	0	0	2	3	0	48.6
MAPK3	ENSG00000102882	mitogen-activated protein kinase 3	810	4	FALSE	TRUE	FALSE	TRUE	FALSE	FALSE	FALSE	FALSE	FALSE	FALSE	FALSE	FALSE	Cytoplasm	2	5	CHEMBL4650285	TEMUTERKIB	FALSE	2	FALSE	Reactome	Interferon Signaling	4	0	0	2	3	0	48.6
MAPK3	ENSG00000102882	mitogen-activated protein kinase 3	810	4	FALSE	TRUE	FALSE	TRUE	FALSE	FALSE	FALSE	FALSE	FALSE	FALSE	FALSE	FALSE	Cytoplasm	2	5	CHEMBL4650285	TEMUTERKIB	FALSE	2	FALSE	Reactome	Cytokine Signaling in Immune system	4	0	0	2	3	0	48.6
MAPK3	ENSG00000102882	mitogen-activated protein kinase 3	810	4	FALSE	TRUE	FALSE	TRUE	FALSE	FALSE	FALSE	FALSE	FALSE	FALSE	FALSE	FALSE	Cytoplasm	2	5	CHEMBL3545001	MK-8353	FALSE	1	FALSE	Reactome	Cytokine Signaling in Immune system	4	0	0	2	3	0	48.6
MAPK3	ENSG00000102882	mitogen-activated protein kinase 3	810	4	FALSE	TRUE	FALSE	TRUE	FALSE	FALSE	FALSE	FALSE	FALSE	FALSE	FALSE	FALSE	Cytoplasm	2	5	CHEMBL3590106	ULIXERTINIB	FALSE	2	FALSE	Reactome	Interferon Signaling	4	0	0	2	3	0	48.6
MAPK3	ENSG00000102882	mitogen-activated protein kinase 3	810	4	FALSE	TRUE	FALSE	TRUE	FALSE	FALSE	FALSE	FALSE	FALSE	FALSE	FALSE	FALSE	Cytoplasm	2	5	CHEMBL3590106	ULIXERTINIB	FALSE	2	FALSE	Reactome	Cytokine Signaling in Immune system	4	0	0	2	3	0	48.6
MAPK3	ENSG00000102882	mitogen-activated protein kinase 3	810	4	FALSE	TRUE	FALSE	TRUE	FALSE	FALSE	FALSE	FALSE	FALSE	FALSE	FALSE	FALSE	Cytoplasm	2	5	CHEMBL3590106	ULIXERTINIB	FALSE	2	FALSE	Reactome	Interferon Signaling	4	0	0	2	3	0	48.6
MAPK3	ENSG00000102882	mitogen-activated protein kinase 3	810	4	FALSE	TRUE	FALSE	TRUE	FALSE	FALSE	FALSE	FALSE	FALSE	FALSE	FALSE	FALSE	Cytoplasm	2	5	CHEMBL3590106	ULIXERTINIB	FALSE	2	FALSE	Reactome	Interferon Signaling	4	0	0	2	3	0	48.6
MAPK3	ENSG00000102882	mitogen-activated protein kinase 3	810	4	FALSE	TRUE	FALSE	TRUE	FALSE	FALSE	FALSE	FALSE	FALSE	FALSE	FALSE	FALSE	Cytoplasm	2	5	CHEMBL3590106	ULIXERTINIB	FALSE	2	FALSE	Reactome	Cytokine Signaling in Immune system	4	0	0	2	3	0	48.6
MAPK3	ENSG00000102882	mitogen-activated protein kinase 3	810	4	FALSE	TRUE	FALSE	TRUE	FALSE	FALSE	FALSE	FALSE	FALSE	FALSE	FALSE	FALSE	Cytoplasm	2	5	CHEMBL4650284	KO-947	FALSE	1	FALSE	KEGG	HIF-1 signaling pathway	4	0	0	2	3	0	48.6
MAPK3	ENSG00000102882	mitogen-activated protein kinase 3	810	4	FALSE	TRUE	FALSE	TRUE	FALSE	FALSE	FALSE	FALSE	FALSE	FALSE	FALSE	FALSE	Cytoplasm	2	5	CHEMBL3590106	ULIXERTINIB	FALSE	2	FALSE	Reactome	Cytokine Signaling in Immune system	4	0	0	2	3	0	48.6
MAPK3	ENSG00000102882	mitogen-activated protein kinase 3	810	4	FALSE	TRUE	FALSE	TRUE	FALSE	FALSE	FALSE	FALSE	FALSE	FALSE	FALSE	FALSE	Cytoplasm	2	5	CHEMBL3590106	ULIXERTINIB	FALSE	2	FALSE	Reactome	Interferon Signaling	4	0	0	2	3	0	48.6
PLK1	ENSG00000166851	polo like kinase 1	280	5	FALSE	TRUE	FALSE	TRUE	FALSE	FALSE	FALSE	FALSE	FALSE	FALSE	FALSE	FALSE	Nucleus	1	7	CHEMBL1233528	VOLASERTIB	FALSE	3	FALSE	Reactome	Resolution of Sister Chromatid Cohesion	6	0	1	2	3	0	48.3
PLK1	ENSG00000166851	polo like kinase 1	280	5	FALSE	TRUE	FALSE	TRUE	FALSE	FALSE	FALSE	FALSE	FALSE	FALSE	FALSE	FALSE	Nucleus	1	7	CHEMBL1233528	VOLASERTIB	FALSE	3	FALSE	Reactome	Anchoring of the basal body to the plasma membrane	6	0	1	2	3	0	48.3
PLK1	ENSG00000166851	polo like kinase 1	280	5	FALSE	TRUE	FALSE	TRUE	FALSE	FALSE	FALSE	FALSE	FALSE	FALSE	FALSE	FALSE	Nucleus	1	7	CHEMBL1233528	VOLASERTIB	FALSE	3	FALSE	Reactome	Cell Cycle Checkpoints	6	0	1	2	3	0	48.3
PLK1	ENSG00000166851	polo like kinase 1	280	5	FALSE	TRUE	FALSE	TRUE	FALSE	FALSE	FALSE	FALSE	FALSE	FALSE	FALSE	FALSE	Nucleus	1	7	CHEMBL1233528	VOLASERTIB	FALSE	3	FALSE	Reactome	Anchoring of the basal body to the plasma membrane	6	0	1	2	3	0	48.3
PLK1	ENSG00000166851	polo like kinase 1	280	5	FALSE	TRUE	FALSE	TRUE	FALSE	FALSE	FALSE	FALSE	FALSE	FALSE	FALSE	FALSE	Nucleus	1	7	CHEMBL513909	BI-2536	FALSE	2	FALSE	Reactome	Cell Cycle Checkpoints	6	0	1	2	3	0	48.3
PLK1	ENSG00000166851	polo like kinase 1	280	5	FALSE	TRUE	FALSE	TRUE	FALSE	FALSE	FALSE	FALSE	FALSE	FALSE	FALSE	FALSE	Nucleus	1	7	CHEMBL513909	BI-2536	FALSE	2	FALSE	Reactome	Resolution of Sister Chromatid Cohesion	6	0	1	2	3	0	48.3
PLK1	ENSG00000166851	polo like kinase 1	280	5	FALSE	TRUE	FALSE	TRUE	FALSE	FALSE	FALSE	FALSE	FALSE	FALSE	FALSE	FALSE	Nucleus	1	7	CHEMBL1738758	ONVANSERTIB	FALSE	2	FALSE	Reactome	Resolution of Sister Chromatid Cohesion	6	0	1	2	3	0	48.3
PLK1	ENSG00000166851	polo like kinase 1	280	5	FALSE	TRUE	FALSE	TRUE	FALSE	FALSE	FALSE	FALSE	FALSE	FALSE	FALSE	FALSE	Nucleus	1	7	CHEMBL1738758	ONVANSERTIB	FALSE	2	FALSE	Reactome	APC/C:Cdh1 mediated degradation of Cdc20 and other APC/C:Cdh1 targeted proteins in late mitosis/early G1	6	0	1	2	3	0	48.3
PLK1	ENSG00000166851	polo like kinase 1	280	5	FALSE	TRUE	FALSE	TRUE	FALSE	FALSE	FALSE	FALSE	FALSE	FALSE	FALSE	FALSE	Nucleus	1	7	CHEMBL1738758	ONVANSERTIB	FALSE	2	FALSE	Reactome	Resolution of Sister Chromatid Cohesion	6	0	1	2	3	0	48.3
PLK1	ENSG00000166851	polo like kinase 1	280	5	FALSE	TRUE	FALSE	TRUE	FALSE	FALSE	FALSE	FALSE	FALSE	FALSE	FALSE	FALSE	Nucleus	1	7	CHEMBL1738758	ONVANSERTIB	FALSE	2	FALSE	Reactome	Cell Cycle Checkpoints	6	0	1	2	3	0	48.3
PLK1	ENSG00000166851	polo like kinase 1	280	5	FALSE	TRUE	FALSE	TRUE	FALSE	FALSE	FALSE	FALSE	FALSE	FALSE	FALSE	FALSE	Nucleus	1	7	CHEMBL1738758	ONVANSERTIB	FALSE	2	FALSE	Reactome	Cell Cycle Checkpoints	6	0	1	2	3	0	48.3
PLK1	ENSG00000166851	polo like kinase 1	280	5	FALSE	TRUE	FALSE	TRUE	FALSE	FALSE	FALSE	FALSE	FALSE	FALSE	FALSE	FALSE	Nucleus	1	7	CHEMBL1233528	VOLASERTIB	FALSE	3	FALSE	Reactome	Cell Cycle Checkpoints	6	0	1	2	3	0	48.3
PLK1	ENSG00000166851	polo like kinase 1	280	5	FALSE	TRUE	FALSE	TRUE	FALSE	FALSE	FALSE	FALSE	FALSE	FALSE	FALSE	FALSE	Nucleus	1	7	CHEMBL3545354	CAFUSERTIB	FALSE	1	FALSE	Reactome	Resolution of Sister Chromatid Cohesion	6	0	1	2	3	0	48.3
PLK1	ENSG00000166851	polo like kinase 1	280	5	FALSE	TRUE	FALSE	TRUE	FALSE	FALSE	FALSE	FALSE	FALSE	FALSE	FALSE	FALSE	Nucleus	1	7	CHEMBL1738758	ONVANSERTIB	FALSE	2	FALSE	Reactome	Cell Cycle Checkpoints	6	0	1	2	3	0	48.3
PLK1	ENSG00000166851	polo like kinase 1	280	5	FALSE	TRUE	FALSE	TRUE	FALSE	FALSE	FALSE	FALSE	FALSE	FALSE	FALSE	FALSE	Nucleus	1	7	CHEMBL513909	BI-2536	FALSE	2	FALSE	Reactome	Cell Cycle Checkpoints	6	0	1	2	3	0	48.3
PLK1	ENSG00000166851	polo like kinase 1	280	5	FALSE	TRUE	FALSE	TRUE	FALSE	FALSE	FALSE	FALSE	FALSE	FALSE	FALSE	FALSE	Nucleus	1	7	CHEMBL1233528	VOLASERTIB	FALSE	3	FALSE	Reactome	Resolution of Sister Chromatid Cohesion	6	0	1	2	3	0	48.3
PLK1	ENSG00000166851	polo like kinase 1	280	5	FALSE	TRUE	FALSE	TRUE	FALSE	FALSE	FALSE	FALSE	FALSE	FALSE	FALSE	FALSE	Nucleus	1	7	CHEMBL1233528	VOLASERTIB	FALSE	3	FALSE	Reactome	APC/C:Cdh1 mediated degradation of Cdc20 and other APC/C:Cdh1 targeted proteins in late mitosis/early G1	6	0	1	2	3	0	48.3
PLK1	ENSG00000166851	polo like kinase 1	280	5	FALSE	TRUE	FALSE	TRUE	FALSE	FALSE	FALSE	FALSE	FALSE	FALSE	FALSE	FALSE	Nucleus	1	7	CHEMBL513909	BI-2536	FALSE	2	FALSE	NCI	PLK1 signaling events	6	0	1	2	3	0	48.3
PLK1	ENSG00000166851	polo like kinase 1	280	5	FALSE	TRUE	FALSE	TRUE	FALSE	FALSE	FALSE	FALSE	FALSE	FALSE	FALSE	FALSE	Nucleus	1	7	CHEMBL1233528	VOLASERTIB	FALSE	3	FALSE	Reactome	Cell Cycle Checkpoints	6	0	1	2	3	0	48.3
PLK1	ENSG00000166851	polo like kinase 1	280	5	FALSE	TRUE	FALSE	TRUE	FALSE	FALSE	FALSE	FALSE	FALSE	FALSE	FALSE	FALSE	Nucleus	1	7	CHEMBL513909	BI-2536	FALSE	2	FALSE	Reactome	Cell Cycle Checkpoints	6	0	1	2	3	0	48.3
PLK1	ENSG00000166851	polo like kinase 1	280	5	FALSE	TRUE	FALSE	TRUE	FALSE	FALSE	FALSE	FALSE	FALSE	FALSE	FALSE	FALSE	Nucleus	1	7	CHEMBL1233528	VOLASERTIB	FALSE	3	FALSE	Reactome	APC/C:Cdh1 mediated degradation of Cdc20 and other APC/C:Cdh1 targeted proteins in late mitosis/early G1	6	0	1	2	3	0	48.3
PLK1	ENSG00000166851	polo like kinase 1	280	5	FALSE	TRUE	FALSE	TRUE	FALSE	FALSE	FALSE	FALSE	FALSE	FALSE	FALSE	FALSE	Nucleus	1	7	CHEMBL1233528	VOLASERTIB	FALSE	3	FALSE	Reactome	Resolution of Sister Chromatid Cohesion	6	0	1	2	3	0	48.3
PLK1	ENSG00000166851	polo like kinase 1	280	5	FALSE	TRUE	FALSE	TRUE	FALSE	FALSE	FALSE	FALSE	FALSE	FALSE	FALSE	FALSE	Nucleus	1	7	CHEMBL1233528	VOLASERTIB	FALSE	3	FALSE	Reactome	Anchoring of the basal body to the plasma membrane	6	0	1	2	3	0	48.3
PLK1	ENSG00000166851	polo like kinase 1	280	5	FALSE	TRUE	FALSE	TRUE	FALSE	FALSE	FALSE	FALSE	FALSE	FALSE	FALSE	FALSE	Nucleus	1	7	CHEMBL513909	BI-2536	FALSE	2	FALSE	Reactome	Anchoring of the basal body to the plasma membrane	6	0	1	2	3	0	48.3
PLK1	ENSG00000166851	polo like kinase 1	280	5	FALSE	TRUE	FALSE	TRUE	FALSE	FALSE	FALSE	FALSE	FALSE	FALSE	FALSE	FALSE	Nucleus	1	7	CHEMBL1233528	VOLASERTIB	FALSE	3	FALSE	Reactome	Resolution of Sister Chromatid Cohesion	6	0	1	2	3	0	48.3
PLK1	ENSG00000166851	polo like kinase 1	280	5	FALSE	TRUE	FALSE	TRUE	FALSE	FALSE	FALSE	FALSE	FALSE	FALSE	FALSE	FALSE	Nucleus	1	7	CHEMBL1233528	VOLASERTIB	FALSE	3	FALSE	NCI	PLK1 signaling events	6	0	1	2	3	0	48.3
PLK1	ENSG00000166851	polo like kinase 1	280	5	FALSE	TRUE	FALSE	TRUE	FALSE	FALSE	FALSE	FALSE	FALSE	FALSE	FALSE	FALSE	Nucleus	1	7	CHEMBL513909	BI-2536	FALSE	2	FALSE	Reactome	Cell Cycle Checkpoints	6	0	1	2	3	0	48.3
PLK1	ENSG00000166851	polo like kinase 1	280	5	FALSE	TRUE	FALSE	TRUE	FALSE	FALSE	FALSE	FALSE	FALSE	FALSE	FALSE	FALSE	Nucleus	1	7	CHEMBL1233528	VOLASERTIB	FALSE	3	FALSE	Reactome	Anchoring of the basal body to the plasma membrane	6	0	1	2	3	0	48.3
PLK1	ENSG00000166851	polo like kinase 1	280	5	FALSE	TRUE	FALSE	TRUE	FALSE	FALSE	FALSE	FALSE	FALSE	FALSE	FALSE	FALSE	Nucleus	1	7	CHEMBL1233528	VOLASERTIB	FALSE	3	FALSE	Reactome	APC/C:Cdh1 mediated degradation of Cdc20 and other APC/C:Cdh1 targeted proteins in late mitosis/early G1	6	0	1	2	3	0	48.3
PLK1	ENSG00000166851	polo like kinase 1	280	5	FALSE	TRUE	FALSE	TRUE	FALSE	FALSE	FALSE	FALSE	FALSE	FALSE	FALSE	FALSE	Nucleus	1	7	CHEMBL1233528	VOLASERTIB	FALSE	3	FALSE	Reactome	Anchoring of the basal body to the plasma membrane	6	0	1	2	3	0	48.3
PLK1	ENSG00000166851	polo like kinase 1	280	5	FALSE	TRUE	FALSE	TRUE	FALSE	FALSE	FALSE	FALSE	FALSE	FALSE	FALSE	FALSE	Nucleus	1	7	CHEMBL513909	BI-2536	FALSE	2	FALSE	Reactome	APC/C:Cdh1 mediated degradation of Cdc20 and other APC/C:Cdh1 targeted proteins in late mitosis/early G1	6	0	1	2	3	0	48.3
PLK1	ENSG00000166851	polo like kinase 1	280	5	FALSE	TRUE	FALSE	TRUE	FALSE	FALSE	FALSE	FALSE	FALSE	FALSE	FALSE	FALSE	Nucleus	1	7	CHEMBL1233528	VOLASERTIB	FALSE	3	FALSE	Reactome	APC/C:Cdh1 mediated degradation of Cdc20 and other APC/C:Cdh1 targeted proteins in late mitosis/early G1	6	0	1	2	3	0	48.3
PLK1	ENSG00000166851	polo like kinase 1	280	5	FALSE	TRUE	FALSE	TRUE	FALSE	FALSE	FALSE	FALSE	FALSE	FALSE	FALSE	FALSE	Nucleus	1	7	CHEMBL1738758	ONVANSERTIB	FALSE	2	FALSE	Reactome	Cell Cycle Checkpoints	6	0	1	2	3	0	48.3
PLK1	ENSG00000166851	polo like kinase 1	280	5	FALSE	TRUE	FALSE	TRUE	FALSE	FALSE	FALSE	FALSE	FALSE	FALSE	FALSE	FALSE	Nucleus	1	7	CHEMBL513909	BI-2536	FALSE	2	FALSE	Reactome	Cell Cycle Checkpoints	6	0	1	2	3	0	48.3
PLK1	ENSG00000166851	polo like kinase 1	280	5	FALSE	TRUE	FALSE	TRUE	FALSE	FALSE	FALSE	FALSE	FALSE	FALSE	FALSE	FALSE	Nucleus	1	7	CHEMBL2392545	TAK-960	FALSE	1	FALSE	Reactome	Resolution of Sister Chromatid Cohesion	6	0	1	2	3	0	48.3
PLK1	ENSG00000166851	polo like kinase 1	280	5	FALSE	TRUE	FALSE	TRUE	FALSE	FALSE	FALSE	FALSE	FALSE	FALSE	FALSE	FALSE	Nucleus	1	7	CHEMBL513909	BI-2536	FALSE	2	FALSE	Reactome	Anchoring of the basal body to the plasma membrane	6	0	1	2	3	0	48.3
PLK1	ENSG00000166851	polo like kinase 1	280	5	FALSE	TRUE	FALSE	TRUE	FALSE	FALSE	FALSE	FALSE	FALSE	FALSE	FALSE	FALSE	Nucleus	1	7	CHEMBL3545077	MK-1496	FALSE	1	FALSE	Reactome	Resolution of Sister Chromatid Cohesion	6	0	1	2	3	0	48.3
PLK1	ENSG00000166851	polo like kinase 1	280	5	FALSE	TRUE	FALSE	TRUE	FALSE	FALSE	FALSE	FALSE	FALSE	FALSE	FALSE	FALSE	Nucleus	1	7	CHEMBL1738758	ONVANSERTIB	FALSE	2	FALSE	Reactome	APC/C:Cdh1 mediated degradation of Cdc20 and other APC/C:Cdh1 targeted proteins in late mitosis/early G1	6	0	1	2	3	0	48.3
PLK1	ENSG00000166851	polo like kinase 1	280	5	FALSE	TRUE	FALSE	TRUE	FALSE	FALSE	FALSE	FALSE	FALSE	FALSE	FALSE	FALSE	Nucleus	1	7	CHEMBL1233528	VOLASERTIB	FALSE	3	FALSE	Reactome	APC/C:Cdh1 mediated degradation of Cdc20 and other APC/C:Cdh1 targeted proteins in late mitosis/early G1	6	0	1	2	3	0	48.3
PLK1	ENSG00000166851	polo like kinase 1	280	5	FALSE	TRUE	FALSE	TRUE	FALSE	FALSE	FALSE	FALSE	FALSE	FALSE	FALSE	FALSE	Nucleus	1	7	CHEMBL1738758	ONVANSERTIB	FALSE	2	FALSE	NCI	PLK1 signaling events	6	0	1	2	3	0	48.3
PLK1	ENSG00000166851	polo like kinase 1	280	5	FALSE	TRUE	FALSE	TRUE	FALSE	FALSE	FALSE	FALSE	FALSE	FALSE	FALSE	FALSE	Nucleus	1	7	CHEMBL1233528	VOLASERTIB	FALSE	3	FALSE	Reactome	Anchoring of the basal body to the plasma membrane	6	0	1	2	3	0	48.3
PLK1	ENSG00000166851	polo like kinase 1	280	5	FALSE	TRUE	FALSE	TRUE	FALSE	FALSE	FALSE	FALSE	FALSE	FALSE	FALSE	FALSE	Nucleus	1	7	CHEMBL1233528	VOLASERTIB	FALSE	3	FALSE	NCI	PLK1 signaling events	6	0	1	2	3	0	48.3
PLK1	ENSG00000166851	polo like kinase 1	280	5	FALSE	TRUE	FALSE	TRUE	FALSE	FALSE	FALSE	FALSE	FALSE	FALSE	FALSE	FALSE	Nucleus	1	7	CHEMBL3545354	CAFUSERTIB	FALSE	1	FALSE	Reactome	Mitotic Prometaphase	6	0	1	2	3	0	48.3
PLK1	ENSG00000166851	polo like kinase 1	280	5	FALSE	TRUE	FALSE	TRUE	FALSE	FALSE	FALSE	FALSE	FALSE	FALSE	FALSE	FALSE	Nucleus	1	7	CHEMBL513909	BI-2536	FALSE	2	FALSE	NCI	PLK1 signaling events	6	0	1	2	3	0	48.3
PLK1	ENSG00000166851	polo like kinase 1	280	5	FALSE	TRUE	FALSE	TRUE	FALSE	FALSE	FALSE	FALSE	FALSE	FALSE	FALSE	FALSE	Nucleus	1	7	CHEMBL513909	BI-2536	FALSE	2	FALSE	Reactome	Anchoring of the basal body to the plasma membrane	6	0	1	2	3	0	48.3
PLK1	ENSG00000166851	polo like kinase 1	280	5	FALSE	TRUE	FALSE	TRUE	FALSE	FALSE	FALSE	FALSE	FALSE	FALSE	FALSE	FALSE	Nucleus	1	7	CHEMBL513909	BI-2536	FALSE	2	FALSE	Reactome	APC/C:Cdh1 mediated degradation of Cdc20 and other APC/C:Cdh1 targeted proteins in late mitosis/early G1	6	0	1	2	3	0	48.3
PLK1	ENSG00000166851	polo like kinase 1	280	5	FALSE	TRUE	FALSE	TRUE	FALSE	FALSE	FALSE	FALSE	FALSE	FALSE	FALSE	FALSE	Nucleus	1	7	CHEMBL1738758	ONVANSERTIB	FALSE	2	FALSE	NCI	PLK1 signaling events	6	0	1	2	3	0	48.3
PLK1	ENSG00000166851	polo like kinase 1	280	5	FALSE	TRUE	FALSE	TRUE	FALSE	FALSE	FALSE	FALSE	FALSE	FALSE	FALSE	FALSE	Nucleus	1	7	CHEMBL1738758	ONVANSERTIB	FALSE	2	FALSE	NCI	PLK1 signaling events	6	0	1	2	3	0	48.3
PLK1	ENSG00000166851	polo like kinase 1	280	5	FALSE	TRUE	FALSE	TRUE	FALSE	FALSE	FALSE	FALSE	FALSE	FALSE	FALSE	FALSE	Nucleus	1	7	CHEMBL1738758	ONVANSERTIB	FALSE	2	FALSE	Reactome	Anchoring of the basal body to the plasma membrane	6	0	1	2	3	0	48.3
PLK1	ENSG00000166851	polo like kinase 1	280	5	FALSE	TRUE	FALSE	TRUE	FALSE	FALSE	FALSE	FALSE	FALSE	FALSE	FALSE	FALSE	Nucleus	1	7	CHEMBL1233528	VOLASERTIB	FALSE	3	FALSE	Reactome	Resolution of Sister Chromatid Cohesion	6	0	1	2	3	0	48.3
PLK1	ENSG00000166851	polo like kinase 1	280	5	FALSE	TRUE	FALSE	TRUE	FALSE	FALSE	FALSE	FALSE	FALSE	FALSE	FALSE	FALSE	Nucleus	1	7	CHEMBL513909	BI-2536	FALSE	2	FALSE	Reactome	APC/C:Cdh1 mediated degradation of Cdc20 and other APC/C:Cdh1 targeted proteins in late mitosis/early G1	6	0	1	2	3	0	48.3
PLK1	ENSG00000166851	polo like kinase 1	280	5	FALSE	TRUE	FALSE	TRUE	FALSE	FALSE	FALSE	FALSE	FALSE	FALSE	FALSE	FALSE	Nucleus	1	7	CHEMBL1233528	VOLASERTIB	FALSE	3	FALSE	Reactome	Mitotic Prometaphase	6	0	1	2	3	0	48.3
PLK1	ENSG00000166851	polo like kinase 1	280	5	FALSE	TRUE	FALSE	TRUE	FALSE	FALSE	FALSE	FALSE	FALSE	FALSE	FALSE	FALSE	Nucleus	1	7	CHEMBL1738758	ONVANSERTIB	FALSE	2	FALSE	Reactome	Anchoring of the basal body to the plasma membrane	6	0	1	2	3	0	48.3
PLK1	ENSG00000166851	polo like kinase 1	280	5	FALSE	TRUE	FALSE	TRUE	FALSE	FALSE	FALSE	FALSE	FALSE	FALSE	FALSE	FALSE	Nucleus	1	7	CHEMBL1233528	VOLASERTIB	FALSE	3	FALSE	Reactome	Mitotic Prometaphase	6	0	1	2	3	0	48.3
PLK1	ENSG00000166851	polo like kinase 1	280	5	FALSE	TRUE	FALSE	TRUE	FALSE	FALSE	FALSE	FALSE	FALSE	FALSE	FALSE	FALSE	Nucleus	1	7	CHEMBL513909	BI-2536	FALSE	2	FALSE	Reactome	Mitotic Prometaphase	6	0	1	2	3	0	48.3
PLK1	ENSG00000166851	polo like kinase 1	280	5	FALSE	TRUE	FALSE	TRUE	FALSE	FALSE	FALSE	FALSE	FALSE	FALSE	FALSE	FALSE	Nucleus	1	7	CHEMBL1233528	VOLASERTIB	FALSE	3	FALSE	NCI	PLK1 signaling events	6	0	1	2	3	0	48.3
PLK1	ENSG00000166851	polo like kinase 1	280	5	FALSE	TRUE	FALSE	TRUE	FALSE	FALSE	FALSE	FALSE	FALSE	FALSE	FALSE	FALSE	Nucleus	1	7	CHEMBL3545354	CAFUSERTIB	FALSE	1	FALSE	Reactome	Cell Cycle Checkpoints	6	0	1	2	3	0	48.3
PLK1	ENSG00000166851	polo like kinase 1	280	5	FALSE	TRUE	FALSE	TRUE	FALSE	FALSE	FALSE	FALSE	FALSE	FALSE	FALSE	FALSE	Nucleus	1	7	CHEMBL1738758	ONVANSERTIB	FALSE	2	FALSE	NCI	PLK1 signaling events	6	0	1	2	3	0	48.3
PLK1	ENSG00000166851	polo like kinase 1	280	5	FALSE	TRUE	FALSE	TRUE	FALSE	FALSE	FALSE	FALSE	FALSE	FALSE	FALSE	FALSE	Nucleus	1	7	CHEMBL513909	BI-2536	FALSE	2	FALSE	NCI	PLK1 signaling events	6	0	1	2	3	0	48.3
PLK1	ENSG00000166851	polo like kinase 1	280	5	FALSE	TRUE	FALSE	TRUE	FALSE	FALSE	FALSE	FALSE	FALSE	FALSE	FALSE	FALSE	Nucleus	1	7	CHEMBL513909	BI-2536	FALSE	2	FALSE	Reactome	Anchoring of the basal body to the plasma membrane	6	0	1	2	3	0	48.3
PLK1	ENSG00000166851	polo like kinase 1	280	5	FALSE	TRUE	FALSE	TRUE	FALSE	FALSE	FALSE	FALSE	FALSE	FALSE	FALSE	FALSE	Nucleus	1	7	CHEMBL1233528	VOLASERTIB	FALSE	3	FALSE	NCI	PLK1 signaling events	6	0	1	2	3	0	48.3
PLK1	ENSG00000166851	polo like kinase 1	280	5	FALSE	TRUE	FALSE	TRUE	FALSE	FALSE	FALSE	FALSE	FALSE	FALSE	FALSE	FALSE	Nucleus	1	7	CHEMBL1233528	VOLASERTIB	FALSE	3	FALSE	Reactome	APC/C:Cdh1 mediated degradation of Cdc20 and other APC/C:Cdh1 targeted proteins in late mitosis/early G1	6	0	1	2	3	0	48.3
PLK1	ENSG00000166851	polo like kinase 1	280	5	FALSE	TRUE	FALSE	TRUE	FALSE	FALSE	FALSE	FALSE	FALSE	FALSE	FALSE	FALSE	Nucleus	1	7	CHEMBL2392545	TAK-960	FALSE	1	FALSE	NCI	PLK1 signaling events	6	0	1	2	3	0	48.3
PLK1	ENSG00000166851	polo like kinase 1	280	5	FALSE	TRUE	FALSE	TRUE	FALSE	FALSE	FALSE	FALSE	FALSE	FALSE	FALSE	FALSE	Nucleus	1	7	CHEMBL1233528	VOLASERTIB	FALSE	3	FALSE	Reactome	Anchoring of the basal body to the plasma membrane	6	0	1	2	3	0	48.3
PLK1	ENSG00000166851	polo like kinase 1	280	5	FALSE	TRUE	FALSE	TRUE	FALSE	FALSE	FALSE	FALSE	FALSE	FALSE	FALSE	FALSE	Nucleus	1	7	CHEMBL2392545	TAK-960	FALSE	1	FALSE	Reactome	APC/C:Cdh1 mediated degradation of Cdc20 and other APC/C:Cdh1 targeted proteins in late mitosis/early G1	6	0	1	2	3	0	48.3
PLK1	ENSG00000166851	polo like kinase 1	280	5	FALSE	TRUE	FALSE	TRUE	FALSE	FALSE	FALSE	FALSE	FALSE	FALSE	FALSE	FALSE	Nucleus	1	7	CHEMBL1738758	ONVANSERTIB	FALSE	2	FALSE	Reactome	Anchoring of the basal body to the plasma membrane	6	0	1	2	3	0	48.3
PLK1	ENSG00000166851	polo like kinase 1	280	5	FALSE	TRUE	FALSE	TRUE	FALSE	FALSE	FALSE	FALSE	FALSE	FALSE	FALSE	FALSE	Nucleus	1	7	CHEMBL1233528	VOLASERTIB	FALSE	3	FALSE	Reactome	Mitotic Prometaphase	6	0	1	2	3	0	48.3
PLK1	ENSG00000166851	polo like kinase 1	280	5	FALSE	TRUE	FALSE	TRUE	FALSE	FALSE	FALSE	FALSE	FALSE	FALSE	FALSE	FALSE	Nucleus	1	7	CHEMBL1233528	VOLASERTIB	FALSE	3	FALSE	NCI	PLK1 signaling events	6	0	1	2	3	0	48.3
PLK1	ENSG00000166851	polo like kinase 1	280	5	FALSE	TRUE	FALSE	TRUE	FALSE	FALSE	FALSE	FALSE	FALSE	FALSE	FALSE	FALSE	Nucleus	1	7	CHEMBL1233528	VOLASERTIB	FALSE	3	FALSE	Reactome	Cell Cycle Checkpoints	6	0	1	2	3	0	48.3
PLK1	ENSG00000166851	polo like kinase 1	280	5	FALSE	TRUE	FALSE	TRUE	FALSE	FALSE	FALSE	FALSE	FALSE	FALSE	FALSE	FALSE	Nucleus	1	7	CHEMBL1233528	VOLASERTIB	FALSE	3	FALSE	NCI	PLK1 signaling events	6	0	1	2	3	0	48.3
PLK1	ENSG00000166851	polo like kinase 1	280	5	FALSE	TRUE	FALSE	TRUE	FALSE	FALSE	FALSE	FALSE	FALSE	FALSE	FALSE	FALSE	Nucleus	1	7	CHEMBL1233528	VOLASERTIB	FALSE	3	FALSE	NCI	PLK1 signaling events	6	0	1	2	3	0	48.3
PLK1	ENSG00000166851	polo like kinase 1	280	5	FALSE	TRUE	FALSE	TRUE	FALSE	FALSE	FALSE	FALSE	FALSE	FALSE	FALSE	FALSE	Nucleus	1	7	CHEMBL1738758	ONVANSERTIB	FALSE	2	FALSE	Reactome	APC/C:Cdh1 mediated degradation of Cdc20 and other APC/C:Cdh1 targeted proteins in late mitosis/early G1	6	0	1	2	3	0	48.3
PLK1	ENSG00000166851	polo like kinase 1	280	5	FALSE	TRUE	FALSE	TRUE	FALSE	FALSE	FALSE	FALSE	FALSE	FALSE	FALSE	FALSE	Nucleus	1	7	CHEMBL1233528	VOLASERTIB	FALSE	3	FALSE	Reactome	Anchoring of the basal body to the plasma membrane	6	0	1	2	3	0	48.3
PLK1	ENSG00000166851	polo like kinase 1	280	5	FALSE	TRUE	FALSE	TRUE	FALSE	FALSE	FALSE	FALSE	FALSE	FALSE	FALSE	FALSE	Nucleus	1	7	CHEMBL3545077	MK-1496	FALSE	1	FALSE	Reactome	Anchoring of the basal body to the plasma membrane	6	0	1	2	3	0	48.3
PLK1	ENSG00000166851	polo like kinase 1	280	5	FALSE	TRUE	FALSE	TRUE	FALSE	FALSE	FALSE	FALSE	FALSE	FALSE	FALSE	FALSE	Nucleus	1	7	CHEMBL1233528	VOLASERTIB	FALSE	3	FALSE	Reactome	Resolution of Sister Chromatid Cohesion	6	0	1	2	3	0	48.3
PLK1	ENSG00000166851	polo like kinase 1	280	5	FALSE	TRUE	FALSE	TRUE	FALSE	FALSE	FALSE	FALSE	FALSE	FALSE	FALSE	FALSE	Nucleus	1	7	CHEMBL2392545	TAK-960	FALSE	1	FALSE	Reactome	Anchoring of the basal body to the plasma membrane	6	0	1	2	3	0	48.3
PLK1	ENSG00000166851	polo like kinase 1	280	5	FALSE	TRUE	FALSE	TRUE	FALSE	FALSE	FALSE	FALSE	FALSE	FALSE	FALSE	FALSE	Nucleus	1	7	CHEMBL513909	BI-2536	FALSE	2	FALSE	Reactome	Anchoring of the basal body to the plasma membrane	6	0	1	2	3	0	48.3
PLK1	ENSG00000166851	polo like kinase 1	280	5	FALSE	TRUE	FALSE	TRUE	FALSE	FALSE	FALSE	FALSE	FALSE	FALSE	FALSE	FALSE	Nucleus	1	7	CHEMBL1738758	ONVANSERTIB	FALSE	2	FALSE	Reactome	Mitotic Prometaphase	6	0	1	2	3	0	48.3
PLK1	ENSG00000166851	polo like kinase 1	280	5	FALSE	TRUE	FALSE	TRUE	FALSE	FALSE	FALSE	FALSE	FALSE	FALSE	FALSE	FALSE	Nucleus	1	7	CHEMBL3545077	MK-1496	FALSE	1	FALSE	Reactome	APC/C:Cdh1 mediated degradation of Cdc20 and other APC/C:Cdh1 targeted proteins in late mitosis/early G1	6	0	1	2	3	0	48.3
PLK1	ENSG00000166851	polo like kinase 1	280	5	FALSE	TRUE	FALSE	TRUE	FALSE	FALSE	FALSE	FALSE	FALSE	FALSE	FALSE	FALSE	Nucleus	1	7	CHEMBL1738758	ONVANSERTIB	FALSE	2	FALSE	Reactome	Anchoring of the basal body to the plasma membrane	6	0	1	2	3	0	48.3
PLK1	ENSG00000166851	polo like kinase 1	280	5	FALSE	TRUE	FALSE	TRUE	FALSE	FALSE	FALSE	FALSE	FALSE	FALSE	FALSE	FALSE	Nucleus	1	7	CHEMBL3545077	MK-1496	FALSE	1	FALSE	Reactome	Mitotic Prometaphase	6	0	1	2	3	0	48.3
PLK1	ENSG00000166851	polo like kinase 1	280	5	FALSE	TRUE	FALSE	TRUE	FALSE	FALSE	FALSE	FALSE	FALSE	FALSE	FALSE	FALSE	Nucleus	1	7	CHEMBL1738758	ONVANSERTIB	FALSE	2	FALSE	Reactome	Mitotic Prometaphase	6	0	1	2	3	0	48.3
PLK1	ENSG00000166851	polo like kinase 1	280	5	FALSE	TRUE	FALSE	TRUE	FALSE	FALSE	FALSE	FALSE	FALSE	FALSE	FALSE	FALSE	Nucleus	1	7	CHEMBL1233528	VOLASERTIB	FALSE	3	FALSE	NCI	PLK1 signaling events	6	0	1	2	3	0	48.3
PLK1	ENSG00000166851	polo like kinase 1	280	5	FALSE	TRUE	FALSE	TRUE	FALSE	FALSE	FALSE	FALSE	FALSE	FALSE	FALSE	FALSE	Nucleus	1	7	CHEMBL1233528	VOLASERTIB	FALSE	3	FALSE	Reactome	Cell Cycle Checkpoints	6	0	1	2	3	0	48.3
PLK1	ENSG00000166851	polo like kinase 1	280	5	FALSE	TRUE	FALSE	TRUE	FALSE	FALSE	FALSE	FALSE	FALSE	FALSE	FALSE	FALSE	Nucleus	1	7	CHEMBL1233528	VOLASERTIB	FALSE	3	FALSE	NCI	PLK1 signaling events	6	0	1	2	3	0	48.3
PLK1	ENSG00000166851	polo like kinase 1	280	5	FALSE	TRUE	FALSE	TRUE	FALSE	FALSE	FALSE	FALSE	FALSE	FALSE	FALSE	FALSE	Nucleus	1	7	CHEMBL1233528	VOLASERTIB	FALSE	3	FALSE	Reactome	APC/C:Cdh1 mediated degradation of Cdc20 and other APC/C:Cdh1 targeted proteins in late mitosis/early G1	6	0	1	2	3	0	48.3
PLK1	ENSG00000166851	polo like kinase 1	280	5	FALSE	TRUE	FALSE	TRUE	FALSE	FALSE	FALSE	FALSE	FALSE	FALSE	FALSE	FALSE	Nucleus	1	7	CHEMBL1738758	ONVANSERTIB	FALSE	2	FALSE	NCI	PLK1 signaling events	6	0	1	2	3	0	48.3
PLK1	ENSG00000166851	polo like kinase 1	280	5	FALSE	TRUE	FALSE	TRUE	FALSE	FALSE	FALSE	FALSE	FALSE	FALSE	FALSE	FALSE	Nucleus	1	7	CHEMBL513909	BI-2536	FALSE	2	FALSE	Reactome	Resolution of Sister Chromatid Cohesion	6	0	1	2	3	0	48.3
PLK1	ENSG00000166851	polo like kinase 1	280	5	FALSE	TRUE	FALSE	TRUE	FALSE	FALSE	FALSE	FALSE	FALSE	FALSE	FALSE	FALSE	Nucleus	1	7	CHEMBL1233528	VOLASERTIB	FALSE	3	FALSE	Reactome	Anchoring of the basal body to the plasma membrane	6	0	1	2	3	0	48.3
PLK1	ENSG00000166851	polo like kinase 1	280	5	FALSE	TRUE	FALSE	TRUE	FALSE	FALSE	FALSE	FALSE	FALSE	FALSE	FALSE	FALSE	Nucleus	1	7	CHEMBL513909	BI-2536	FALSE	2	FALSE	Reactome	Anchoring of the basal body to the plasma membrane	6	0	1	2	3	0	48.3
PLK1	ENSG00000166851	polo like kinase 1	280	5	FALSE	TRUE	FALSE	TRUE	FALSE	FALSE	FALSE	FALSE	FALSE	FALSE	FALSE	FALSE	Nucleus	1	7	CHEMBL513909	BI-2536	FALSE	2	FALSE	Reactome	Resolution of Sister Chromatid Cohesion	6	0	1	2	3	0	48.3
PLK1	ENSG00000166851	polo like kinase 1	280	5	FALSE	TRUE	FALSE	TRUE	FALSE	FALSE	FALSE	FALSE	FALSE	FALSE	FALSE	FALSE	Nucleus	1	7	CHEMBL1233528	VOLASERTIB	FALSE	3	FALSE	Reactome	Mitotic Prometaphase	6	0	1	2	3	0	48.3
PLK1	ENSG00000166851	polo like kinase 1	280	5	FALSE	TRUE	FALSE	TRUE	FALSE	FALSE	FALSE	FALSE	FALSE	FALSE	FALSE	FALSE	Nucleus	1	7	CHEMBL1738758	ONVANSERTIB	FALSE	2	FALSE	Reactome	Mitotic Prometaphase	6	0	1	2	3	0	48.3
PLK1	ENSG00000166851	polo like kinase 1	280	5	FALSE	TRUE	FALSE	TRUE	FALSE	FALSE	FALSE	FALSE	FALSE	FALSE	FALSE	FALSE	Nucleus	1	7	CHEMBL1233528	VOLASERTIB	FALSE	3	FALSE	Reactome	APC/C:Cdh1 mediated degradation of Cdc20 and other APC/C:Cdh1 targeted proteins in late mitosis/early G1	6	0	1	2	3	0	48.3
PLK1	ENSG00000166851	polo like kinase 1	280	5	FALSE	TRUE	FALSE	TRUE	FALSE	FALSE	FALSE	FALSE	FALSE	FALSE	FALSE	FALSE	Nucleus	1	7	CHEMBL1233528	VOLASERTIB	FALSE	3	FALSE	Reactome	Anchoring of the basal body to the plasma membrane	6	0	1	2	3	0	48.3
PLK1	ENSG00000166851	polo like kinase 1	280	5	FALSE	TRUE	FALSE	TRUE	FALSE	FALSE	FALSE	FALSE	FALSE	FALSE	FALSE	FALSE	Nucleus	1	7	CHEMBL1738758	ONVANSERTIB	FALSE	2	FALSE	Reactome	Mitotic Prometaphase	6	0	1	2	3	0	48.3
PLK1	ENSG00000166851	polo like kinase 1	280	5	FALSE	TRUE	FALSE	TRUE	FALSE	FALSE	FALSE	FALSE	FALSE	FALSE	FALSE	FALSE	Nucleus	1	7	CHEMBL1233528	VOLASERTIB	FALSE	3	FALSE	Reactome	APC/C:Cdh1 mediated degradation of Cdc20 and other APC/C:Cdh1 targeted proteins in late mitosis/early G1	6	0	1	2	3	0	48.3
PLK1	ENSG00000166851	polo like kinase 1	280	5	FALSE	TRUE	FALSE	TRUE	FALSE	FALSE	FALSE	FALSE	FALSE	FALSE	FALSE	FALSE	Nucleus	1	7	CHEMBL513909	BI-2536	FALSE	2	FALSE	NCI	PLK1 signaling events	6	0	1	2	3	0	48.3
PLK1	ENSG00000166851	polo like kinase 1	280	5	FALSE	TRUE	FALSE	TRUE	FALSE	FALSE	FALSE	FALSE	FALSE	FALSE	FALSE	FALSE	Nucleus	1	7	CHEMBL513909	BI-2536	FALSE	2	FALSE	Reactome	Mitotic Prometaphase	6	0	1	2	3	0	48.3
PLK1	ENSG00000166851	polo like kinase 1	280	5	FALSE	TRUE	FALSE	TRUE	FALSE	FALSE	FALSE	FALSE	FALSE	FALSE	FALSE	FALSE	Nucleus	1	7	CHEMBL513909	BI-2536	FALSE	2	FALSE	NCI	PLK1 signaling events	6	0	1	2	3	0	48.3
PLK1	ENSG00000166851	polo like kinase 1	280	5	FALSE	TRUE	FALSE	TRUE	FALSE	FALSE	FALSE	FALSE	FALSE	FALSE	FALSE	FALSE	Nucleus	1	7	CHEMBL1233528	VOLASERTIB	FALSE	3	FALSE	Reactome	Cell Cycle Checkpoints	6	0	1	2	3	0	48.3
PLK1	ENSG00000166851	polo like kinase 1	280	5	FALSE	TRUE	FALSE	TRUE	FALSE	FALSE	FALSE	FALSE	FALSE	FALSE	FALSE	FALSE	Nucleus	1	7	CHEMBL1233528	VOLASERTIB	FALSE	3	FALSE	Reactome	Cell Cycle Checkpoints	6	0	1	2	3	0	48.3
PLK1	ENSG00000166851	polo like kinase 1	280	5	FALSE	TRUE	FALSE	TRUE	FALSE	FALSE	FALSE	FALSE	FALSE	FALSE	FALSE	FALSE	Nucleus	1	7	CHEMBL513909	BI-2536	FALSE	2	FALSE	Reactome	APC/C:Cdh1 mediated degradation of Cdc20 and other APC/C:Cdh1 targeted proteins in late mitosis/early G1	6	0	1	2	3	0	48.3
PLK1	ENSG00000166851	polo like kinase 1	280	5	FALSE	TRUE	FALSE	TRUE	FALSE	FALSE	FALSE	FALSE	FALSE	FALSE	FALSE	FALSE	Nucleus	1	7	CHEMBL1233528	VOLASERTIB	FALSE	3	FALSE	Reactome	Resolution of Sister Chromatid Cohesion	6	0	1	2	3	0	48.3
PLK1	ENSG00000166851	polo like kinase 1	280	5	FALSE	TRUE	FALSE	TRUE	FALSE	FALSE	FALSE	FALSE	FALSE	FALSE	FALSE	FALSE	Nucleus	1	7	CHEMBL1233528	VOLASERTIB	FALSE	3	FALSE	Reactome	APC/C:Cdh1 mediated degradation of Cdc20 and other APC/C:Cdh1 targeted proteins in late mitosis/early G1	6	0	1	2	3	0	48.3
PLK1	ENSG00000166851	polo like kinase 1	280	5	FALSE	TRUE	FALSE	TRUE	FALSE	FALSE	FALSE	FALSE	FALSE	FALSE	FALSE	FALSE	Nucleus	1	7	CHEMBL3545354	CAFUSERTIB	FALSE	1	FALSE	Reactome	APC/C:Cdh1 mediated degradation of Cdc20 and other APC/C:Cdh1 targeted proteins in late mitosis/early G1	6	0	1	2	3	0	48.3
PLK1	ENSG00000166851	polo like kinase 1	280	5	FALSE	TRUE	FALSE	TRUE	FALSE	FALSE	FALSE	FALSE	FALSE	FALSE	FALSE	FALSE	Nucleus	1	7	CHEMBL1738758	ONVANSERTIB	FALSE	2	FALSE	Reactome	Resolution of Sister Chromatid Cohesion	6	0	1	2	3	0	48.3
PLK1	ENSG00000166851	polo like kinase 1	280	5	FALSE	TRUE	FALSE	TRUE	FALSE	FALSE	FALSE	FALSE	FALSE	FALSE	FALSE	FALSE	Nucleus	1	7	CHEMBL1233528	VOLASERTIB	FALSE	3	FALSE	Reactome	Resolution of Sister Chromatid Cohesion	6	0	1	2	3	0	48.3
PLK1	ENSG00000166851	polo like kinase 1	280	5	FALSE	TRUE	FALSE	TRUE	FALSE	FALSE	FALSE	FALSE	FALSE	FALSE	FALSE	FALSE	Nucleus	1	7	CHEMBL1233528	VOLASERTIB	FALSE	3	FALSE	Reactome	Resolution of Sister Chromatid Cohesion	6	0	1	2	3	0	48.3
PLK1	ENSG00000166851	polo like kinase 1	280	5	FALSE	TRUE	FALSE	TRUE	FALSE	FALSE	FALSE	FALSE	FALSE	FALSE	FALSE	FALSE	Nucleus	1	7	CHEMBL1233528	VOLASERTIB	FALSE	3	FALSE	Reactome	Mitotic Prometaphase	6	0	1	2	3	0	48.3
PLK1	ENSG00000166851	polo like kinase 1	280	5	FALSE	TRUE	FALSE	TRUE	FALSE	FALSE	FALSE	FALSE	FALSE	FALSE	FALSE	FALSE	Nucleus	1	7	CHEMBL1738758	ONVANSERTIB	FALSE	2	FALSE	Reactome	Cell Cycle Checkpoints	6	0	1	2	3	0	48.3
PLK1	ENSG00000166851	polo like kinase 1	280	5	FALSE	TRUE	FALSE	TRUE	FALSE	FALSE	FALSE	FALSE	FALSE	FALSE	FALSE	FALSE	Nucleus	1	7	CHEMBL513909	BI-2536	FALSE	2	FALSE	Reactome	Cell Cycle Checkpoints	6	0	1	2	3	0	48.3
PLK1	ENSG00000166851	polo like kinase 1	280	5	FALSE	TRUE	FALSE	TRUE	FALSE	FALSE	FALSE	FALSE	FALSE	FALSE	FALSE	FALSE	Nucleus	1	7	CHEMBL1738758	ONVANSERTIB	FALSE	2	FALSE	Reactome	Anchoring of the basal body to the plasma membrane	6	0	1	2	3	0	48.3
PLK1	ENSG00000166851	polo like kinase 1	280	5	FALSE	TRUE	FALSE	TRUE	FALSE	FALSE	FALSE	FALSE	FALSE	FALSE	FALSE	FALSE	Nucleus	1	7	CHEMBL1738758	ONVANSERTIB	FALSE	2	FALSE	Reactome	APC/C:Cdh1 mediated degradation of Cdc20 and other APC/C:Cdh1 targeted proteins in late mitosis/early G1	6	0	1	2	3	0	48.3
PLK1	ENSG00000166851	polo like kinase 1	280	5	FALSE	TRUE	FALSE	TRUE	FALSE	FALSE	FALSE	FALSE	FALSE	FALSE	FALSE	FALSE	Nucleus	1	7	CHEMBL1233528	VOLASERTIB	FALSE	3	FALSE	Reactome	Cell Cycle Checkpoints	6	0	1	2	3	0	48.3
PLK1	ENSG00000166851	polo like kinase 1	280	5	FALSE	TRUE	FALSE	TRUE	FALSE	FALSE	FALSE	FALSE	FALSE	FALSE	FALSE	FALSE	Nucleus	1	7	CHEMBL2392545	TAK-960	FALSE	1	FALSE	Reactome	Mitotic Prometaphase	6	0	1	2	3	0	48.3
PLK1	ENSG00000166851	polo like kinase 1	280	5	FALSE	TRUE	FALSE	TRUE	FALSE	FALSE	FALSE	FALSE	FALSE	FALSE	FALSE	FALSE	Nucleus	1	7	CHEMBL513909	BI-2536	FALSE	2	FALSE	NCI	PLK1 signaling events	6	0	1	2	3	0	48.3
PLK1	ENSG00000166851	polo like kinase 1	280	5	FALSE	TRUE	FALSE	TRUE	FALSE	FALSE	FALSE	FALSE	FALSE	FALSE	FALSE	FALSE	Nucleus	1	7	CHEMBL1233528	VOLASERTIB	FALSE	3	FALSE	Reactome	Resolution of Sister Chromatid Cohesion	6	0	1	2	3	0	48.3
PLK1	ENSG00000166851	polo like kinase 1	280	5	FALSE	TRUE	FALSE	TRUE	FALSE	FALSE	FALSE	FALSE	FALSE	FALSE	FALSE	FALSE	Nucleus	1	7	CHEMBL1738758	ONVANSERTIB	FALSE	2	FALSE	Reactome	Resolution of Sister Chromatid Cohesion	6	0	1	2	3	0	48.3
PLK1	ENSG00000166851	polo like kinase 1	280	5	FALSE	TRUE	FALSE	TRUE	FALSE	FALSE	FALSE	FALSE	FALSE	FALSE	FALSE	FALSE	Nucleus	1	7	CHEMBL513909	BI-2536	FALSE	2	FALSE	Reactome	Resolution of Sister Chromatid Cohesion	6	0	1	2	3	0	48.3
PLK1	ENSG00000166851	polo like kinase 1	280	5	FALSE	TRUE	FALSE	TRUE	FALSE	FALSE	FALSE	FALSE	FALSE	FALSE	FALSE	FALSE	Nucleus	1	7	CHEMBL1738758	ONVANSERTIB	FALSE	2	FALSE	Reactome	Mitotic Prometaphase	6	0	1	2	3	0	48.3
PLK1	ENSG00000166851	polo like kinase 1	280	5	FALSE	TRUE	FALSE	TRUE	FALSE	FALSE	FALSE	FALSE	FALSE	FALSE	FALSE	FALSE	Nucleus	1	7	CHEMBL513909	BI-2536	FALSE	2	FALSE	Reactome	Mitotic Prometaphase	6	0	1	2	3	0	48.3
PLK1	ENSG00000166851	polo like kinase 1	280	5	FALSE	TRUE	FALSE	TRUE	FALSE	FALSE	FALSE	FALSE	FALSE	FALSE	FALSE	FALSE	Nucleus	1	7	CHEMBL1233528	VOLASERTIB	FALSE	3	FALSE	Reactome	APC/C:Cdh1 mediated degradation of Cdc20 and other APC/C:Cdh1 targeted proteins in late mitosis/early G1	6	0	1	2	3	0	48.3
PLK1	ENSG00000166851	polo like kinase 1	280	5	FALSE	TRUE	FALSE	TRUE	FALSE	FALSE	FALSE	FALSE	FALSE	FALSE	FALSE	FALSE	Nucleus	1	7	CHEMBL513909	BI-2536	FALSE	2	FALSE	Reactome	Mitotic Prometaphase	6	0	1	2	3	0	48.3
PLK1	ENSG00000166851	polo like kinase 1	280	5	FALSE	TRUE	FALSE	TRUE	FALSE	FALSE	FALSE	FALSE	FALSE	FALSE	FALSE	FALSE	Nucleus	1	7	CHEMBL1233528	VOLASERTIB	FALSE	3	FALSE	NCI	PLK1 signaling events	6	0	1	2	3	0	48.3
PLK1	ENSG00000166851	polo like kinase 1	280	5	FALSE	TRUE	FALSE	TRUE	FALSE	FALSE	FALSE	FALSE	FALSE	FALSE	FALSE	FALSE	Nucleus	1	7	CHEMBL1233528	VOLASERTIB	FALSE	3	FALSE	Reactome	Anchoring of the basal body to the plasma membrane	6	0	1	2	3	0	48.3
PLK1	ENSG00000166851	polo like kinase 1	280	5	FALSE	TRUE	FALSE	TRUE	FALSE	FALSE	FALSE	FALSE	FALSE	FALSE	FALSE	FALSE	Nucleus	1	7	CHEMBL513909	BI-2536	FALSE	2	FALSE	Reactome	Resolution of Sister Chromatid Cohesion	6	0	1	2	3	0	48.3
PLK1	ENSG00000166851	polo like kinase 1	280	5	FALSE	TRUE	FALSE	TRUE	FALSE	FALSE	FALSE	FALSE	FALSE	FALSE	FALSE	FALSE	Nucleus	1	7	CHEMBL2392545	TAK-960	FALSE	1	FALSE	Reactome	Cell Cycle Checkpoints	6	0	1	2	3	0	48.3
PLK1	ENSG00000166851	polo like kinase 1	280	5	FALSE	TRUE	FALSE	TRUE	FALSE	FALSE	FALSE	FALSE	FALSE	FALSE	FALSE	FALSE	Nucleus	1	7	CHEMBL1233528	VOLASERTIB	FALSE	3	FALSE	Reactome	Mitotic Prometaphase	6	0	1	2	3	0	48.3
PLK1	ENSG00000166851	polo like kinase 1	280	5	FALSE	TRUE	FALSE	TRUE	FALSE	FALSE	FALSE	FALSE	FALSE	FALSE	FALSE	FALSE	Nucleus	1	7	CHEMBL513909	BI-2536	FALSE	2	FALSE	Reactome	APC/C:Cdh1 mediated degradation of Cdc20 and other APC/C:Cdh1 targeted proteins in late mitosis/early G1	6	0	1	2	3	0	48.3
PLK1	ENSG00000166851	polo like kinase 1	280	5	FALSE	TRUE	FALSE	TRUE	FALSE	FALSE	FALSE	FALSE	FALSE	FALSE	FALSE	FALSE	Nucleus	1	7	CHEMBL513909	BI-2536	FALSE	2	FALSE	Reactome	Mitotic Prometaphase	6	0	1	2	3	0	48.3
PLK1	ENSG00000166851	polo like kinase 1	280	5	FALSE	TRUE	FALSE	TRUE	FALSE	FALSE	FALSE	FALSE	FALSE	FALSE	FALSE	FALSE	Nucleus	1	7	CHEMBL513909	BI-2536	FALSE	2	FALSE	Reactome	Resolution of Sister Chromatid Cohesion	6	0	1	2	3	0	48.3
PLK1	ENSG00000166851	polo like kinase 1	280	5	FALSE	TRUE	FALSE	TRUE	FALSE	FALSE	FALSE	FALSE	FALSE	FALSE	FALSE	FALSE	Nucleus	1	7	CHEMBL1738758	ONVANSERTIB	FALSE	2	FALSE	Reactome	APC/C:Cdh1 mediated degradation of Cdc20 and other APC/C:Cdh1 targeted proteins in late mitosis/early G1	6	0	1	2	3	0	48.3
PLK1	ENSG00000166851	polo like kinase 1	280	5	FALSE	TRUE	FALSE	TRUE	FALSE	FALSE	FALSE	FALSE	FALSE	FALSE	FALSE	FALSE	Nucleus	1	7	CHEMBL513909	BI-2536	FALSE	2	FALSE	Reactome	APC/C:Cdh1 mediated degradation of Cdc20 and other APC/C:Cdh1 targeted proteins in late mitosis/early G1	6	0	1	2	3	0	48.3
PLK1	ENSG00000166851	polo like kinase 1	280	5	FALSE	TRUE	FALSE	TRUE	FALSE	FALSE	FALSE	FALSE	FALSE	FALSE	FALSE	FALSE	Nucleus	1	7	CHEMBL1233528	VOLASERTIB	FALSE	3	FALSE	Reactome	Mitotic Prometaphase	6	0	1	2	3	0	48.3
PLK1	ENSG00000166851	polo like kinase 1	280	5	FALSE	TRUE	FALSE	TRUE	FALSE	FALSE	FALSE	FALSE	FALSE	FALSE	FALSE	FALSE	Nucleus	1	7	CHEMBL1233528	VOLASERTIB	FALSE	3	FALSE	Reactome	Mitotic Prometaphase	6	0	1	2	3	0	48.3
PLK1	ENSG00000166851	polo like kinase 1	280	5	FALSE	TRUE	FALSE	TRUE	FALSE	FALSE	FALSE	FALSE	FALSE	FALSE	FALSE	FALSE	Nucleus	1	7	CHEMBL1233528	VOLASERTIB	FALSE	3	FALSE	Reactome	Mitotic Prometaphase	6	0	1	2	3	0	48.3
PLK1	ENSG00000166851	polo like kinase 1	280	5	FALSE	TRUE	FALSE	TRUE	FALSE	FALSE	FALSE	FALSE	FALSE	FALSE	FALSE	FALSE	Nucleus	1	7	CHEMBL1233528	VOLASERTIB	FALSE	3	FALSE	Reactome	Cell Cycle Checkpoints	6	0	1	2	3	0	48.3
PLK1	ENSG00000166851	polo like kinase 1	280	5	FALSE	TRUE	FALSE	TRUE	FALSE	FALSE	FALSE	FALSE	FALSE	FALSE	FALSE	FALSE	Nucleus	1	7	CHEMBL3545354	CAFUSERTIB	FALSE	1	FALSE	Reactome	Anchoring of the basal body to the plasma membrane	6	0	1	2	3	0	48.3
PLK1	ENSG00000166851	polo like kinase 1	280	5	FALSE	TRUE	FALSE	TRUE	FALSE	FALSE	FALSE	FALSE	FALSE	FALSE	FALSE	FALSE	Nucleus	1	7	CHEMBL1738758	ONVANSERTIB	FALSE	2	FALSE	Reactome	Resolution of Sister Chromatid Cohesion	6	0	1	2	3	0	48.3
PLK1	ENSG00000166851	polo like kinase 1	280	5	FALSE	TRUE	FALSE	TRUE	FALSE	FALSE	FALSE	FALSE	FALSE	FALSE	FALSE	FALSE	Nucleus	1	7	CHEMBL513909	BI-2536	FALSE	2	FALSE	Reactome	Mitotic Prometaphase	6	0	1	2	3	0	48.3
PLK1	ENSG00000166851	polo like kinase 1	280	5	FALSE	TRUE	FALSE	TRUE	FALSE	FALSE	FALSE	FALSE	FALSE	FALSE	FALSE	FALSE	Nucleus	1	7	CHEMBL1233528	VOLASERTIB	FALSE	3	FALSE	Reactome	Cell Cycle Checkpoints	6	0	1	2	3	0	48.3
PLK1	ENSG00000166851	polo like kinase 1	280	5	FALSE	TRUE	FALSE	TRUE	FALSE	FALSE	FALSE	FALSE	FALSE	FALSE	FALSE	FALSE	Nucleus	1	7	CHEMBL1233528	VOLASERTIB	FALSE	3	FALSE	Reactome	Cell Cycle Checkpoints	6	0	1	2	3	0	48.3
PLK1	ENSG00000166851	polo like kinase 1	280	5	FALSE	TRUE	FALSE	TRUE	FALSE	FALSE	FALSE	FALSE	FALSE	FALSE	FALSE	FALSE	Nucleus	1	7	CHEMBL3545354	CAFUSERTIB	FALSE	1	FALSE	NCI	PLK1 signaling events	6	0	1	2	3	0	48.3
PLK1	ENSG00000166851	polo like kinase 1	280	5	FALSE	TRUE	FALSE	TRUE	FALSE	FALSE	FALSE	FALSE	FALSE	FALSE	FALSE	FALSE	Nucleus	1	7	CHEMBL1233528	VOLASERTIB	FALSE	3	FALSE	Reactome	Mitotic Prometaphase	6	0	1	2	3	0	48.3
PLK1	ENSG00000166851	polo like kinase 1	280	5	FALSE	TRUE	FALSE	TRUE	FALSE	FALSE	FALSE	FALSE	FALSE	FALSE	FALSE	FALSE	Nucleus	1	7	CHEMBL1233528	VOLASERTIB	FALSE	3	FALSE	Reactome	Resolution of Sister Chromatid Cohesion	6	0	1	2	3	0	48.3
PLK1	ENSG00000166851	polo like kinase 1	280	5	FALSE	TRUE	FALSE	TRUE	FALSE	FALSE	FALSE	FALSE	FALSE	FALSE	FALSE	FALSE	Nucleus	1	7	CHEMBL3545077	MK-1496	FALSE	1	FALSE	NCI	PLK1 signaling events	6	0	1	2	3	0	48.3
PLK1	ENSG00000166851	polo like kinase 1	280	5	FALSE	TRUE	FALSE	TRUE	FALSE	FALSE	FALSE	FALSE	FALSE	FALSE	FALSE	FALSE	Nucleus	1	7	CHEMBL3545077	MK-1496	FALSE	1	FALSE	Reactome	Cell Cycle Checkpoints	6	0	1	2	3	0	48.3
PLK1	ENSG00000166851	polo like kinase 1	280	5	FALSE	TRUE	FALSE	TRUE	FALSE	FALSE	FALSE	FALSE	FALSE	FALSE	FALSE	FALSE	Nucleus	1	7	CHEMBL1233528	VOLASERTIB	FALSE	3	FALSE	NCI	PLK1 signaling events	6	0	1	2	3	0	48.3
PLK1	ENSG00000166851	polo like kinase 1	280	5	FALSE	TRUE	FALSE	TRUE	FALSE	FALSE	FALSE	FALSE	FALSE	FALSE	FALSE	FALSE	Nucleus	1	7	CHEMBL1233528	VOLASERTIB	FALSE	3	FALSE	Reactome	Mitotic Prometaphase	6	0	1	2	3	0	48.3
TUBB4A	ENSG00000104833	tubulin beta 4A class IVa	719	4	TRUE	FALSE	FALSE	TRUE	TRUE	FALSE	FALSE	FALSE	FALSE	FALSE	TRUE	FALSE	Cytoplasm	0	59	CHEMBL159	VINBLASTINE	TRUE	4	FALSE	Reactome	Anchoring of the basal body to the plasma membrane	2	10	0	0	0	10	44.79
TUBB4A	ENSG00000104833	tubulin beta 4A class IVa	719	4	TRUE	FALSE	FALSE	TRUE	TRUE	FALSE	FALSE	FALSE	FALSE	FALSE	TRUE	FALSE	Cytoplasm	0	59	CHEMBL90555	VINCRISTINE	TRUE	4	FALSE	Reactome	Anchoring of the basal body to the plasma membrane	2	10	0	0	0	10	44.79
TUBB4A	ENSG00000104833	tubulin beta 4A class IVa	719	4	TRUE	FALSE	FALSE	TRUE	TRUE	FALSE	FALSE	FALSE	FALSE	FALSE	TRUE	FALSE	Cytoplasm	0	59	CHEMBL3545252	DOCETAXEL	TRUE	4	FALSE	Reactome	Anchoring of the basal body to the plasma membrane	2	10	0	0	0	10	44.79
TUBB4A	ENSG00000104833	tubulin beta 4A class IVa	719	4	TRUE	FALSE	FALSE	TRUE	TRUE	FALSE	FALSE	FALSE	FALSE	FALSE	TRUE	FALSE	Cytoplasm	0	59	CHEMBL1742994	BRENTUXIMAB VEDOTIN	TRUE	4	FALSE	Reactome	Anchoring of the basal body to the plasma membrane	2	10	0	0	0	10	44.79
TUBB4A	ENSG00000104833	tubulin beta 4A class IVa	719	4	TRUE	FALSE	FALSE	TRUE	TRUE	FALSE	FALSE	FALSE	FALSE	FALSE	TRUE	FALSE	Cytoplasm	0	59	CHEMBL1743082	TRASTUZUMAB EMTANSINE	TRUE	4	FALSE	Reactome	Anchoring of the basal body to the plasma membrane	2	10	0	0	0	10	44.79
TUBB4A	ENSG00000104833	tubulin beta 4A class IVa	719	4	TRUE	FALSE	FALSE	TRUE	TRUE	FALSE	FALSE	FALSE	FALSE	FALSE	TRUE	FALSE	Cytoplasm	0	59	CHEMBL90555	VINCRISTINE	TRUE	4	FALSE	Reactome	Anchoring of the basal body to the plasma membrane	2	10	0	0	0	10	44.79
TUBB4A	ENSG00000104833	tubulin beta 4A class IVa	719	4	TRUE	FALSE	FALSE	TRUE	TRUE	FALSE	FALSE	FALSE	FALSE	FALSE	TRUE	FALSE	Cytoplasm	0	59	CHEMBL92	DOCETAXEL	TRUE	4	FALSE	Reactome	Mitotic Prometaphase	2	10	0	0	0	10	44.79
TUBB4A	ENSG00000104833	tubulin beta 4A class IVa	719	4	TRUE	FALSE	FALSE	TRUE	TRUE	FALSE	FALSE	FALSE	FALSE	FALSE	TRUE	FALSE	Cytoplasm	0	59	CHEMBL428647	PACLITAXEL	TRUE	4	FALSE	Reactome	Anchoring of the basal body to the plasma membrane	2	10	0	0	0	10	44.79
TUBB4A	ENSG00000104833	tubulin beta 4A class IVa	719	4	TRUE	FALSE	FALSE	TRUE	TRUE	FALSE	FALSE	FALSE	FALSE	FALSE	TRUE	FALSE	Cytoplasm	0	59	CHEMBL107	COLCHICINE	TRUE	4	FALSE	Reactome	Anchoring of the basal body to the plasma membrane	2	10	0	0	0	10	44.79
TUBB4A	ENSG00000104833	tubulin beta 4A class IVa	719	4	TRUE	FALSE	FALSE	TRUE	TRUE	FALSE	FALSE	FALSE	FALSE	FALSE	TRUE	FALSE	Cytoplasm	0	59	CHEMBL428647	PACLITAXEL	TRUE	4	FALSE	Reactome	Anchoring of the basal body to the plasma membrane	2	10	0	0	0	10	44.79
TUBB4A	ENSG00000104833	tubulin beta 4A class IVa	719	4	TRUE	FALSE	FALSE	TRUE	TRUE	FALSE	FALSE	FALSE	FALSE	FALSE	TRUE	FALSE	Cytoplasm	0	59	CHEMBL90555	VINCRISTINE	TRUE	4	FALSE	Reactome	Mitotic Prometaphase	2	10	0	0	0	10	44.79
TUBB4A	ENSG00000104833	tubulin beta 4A class IVa	719	4	TRUE	FALSE	FALSE	TRUE	TRUE	FALSE	FALSE	FALSE	FALSE	FALSE	TRUE	FALSE	Cytoplasm	0	59	CHEMBL107	COLCHICINE	TRUE	4	FALSE	Reactome	Mitotic Prometaphase	2	10	0	0	0	10	44.79
TUBB4A	ENSG00000104833	tubulin beta 4A class IVa	719	4	TRUE	FALSE	FALSE	TRUE	TRUE	FALSE	FALSE	FALSE	FALSE	FALSE	TRUE	FALSE	Cytoplasm	0	59	CHEMBL1683544	ERIBULIN MESYLATE	TRUE	4	FALSE	Reactome	Mitotic Prometaphase	2	10	0	0	0	10	44.79
TUBB4A	ENSG00000104833	tubulin beta 4A class IVa	719	4	TRUE	FALSE	FALSE	TRUE	TRUE	FALSE	FALSE	FALSE	FALSE	FALSE	TRUE	FALSE	Cytoplasm	0	59	CHEMBL1201752	IXABEPILONE	TRUE	4	FALSE	Reactome	Anchoring of the basal body to the plasma membrane	2	10	0	0	0	10	44.79
TUBB4A	ENSG00000104833	tubulin beta 4A class IVa	719	4	TRUE	FALSE	FALSE	TRUE	TRUE	FALSE	FALSE	FALSE	FALSE	FALSE	TRUE	FALSE	Cytoplasm	0	59	CHEMBL428647	PACLITAXEL	TRUE	4	FALSE	Reactome	Anchoring of the basal body to the plasma membrane	2	10	0	0	0	10	44.79
TUBB4A	ENSG00000104833	tubulin beta 4A class IVa	719	4	TRUE	FALSE	FALSE	TRUE	TRUE	FALSE	FALSE	FALSE	FALSE	FALSE	TRUE	FALSE	Cytoplasm	0	59	CHEMBL1201752	IXABEPILONE	TRUE	4	FALSE	Reactome	Mitotic Prometaphase	2	10	0	0	0	10	44.79
TUBB4A	ENSG00000104833	tubulin beta 4A class IVa	719	4	TRUE	FALSE	FALSE	TRUE	TRUE	FALSE	FALSE	FALSE	FALSE	FALSE	TRUE	FALSE	Cytoplasm	0	59	CHEMBL1201752	IXABEPILONE	TRUE	4	FALSE	Reactome	Anchoring of the basal body to the plasma membrane	2	10	0	0	0	10	44.79
TUBB4A	ENSG00000104833	tubulin beta 4A class IVa	719	4	TRUE	FALSE	FALSE	TRUE	TRUE	FALSE	FALSE	FALSE	FALSE	FALSE	TRUE	FALSE	Cytoplasm	0	59	CHEMBL3545252	DOCETAXEL	TRUE	4	FALSE	Reactome	Anchoring of the basal body to the plasma membrane	2	10	0	0	0	10	44.79
TUBB4A	ENSG00000104833	tubulin beta 4A class IVa	719	4	TRUE	FALSE	FALSE	TRUE	TRUE	FALSE	FALSE	FALSE	FALSE	FALSE	TRUE	FALSE	Cytoplasm	0	59	CHEMBL92	DOCETAXEL	TRUE	4	FALSE	Reactome	Anchoring of the basal body to the plasma membrane	2	10	0	0	0	10	44.79
TUBB4A	ENSG00000104833	tubulin beta 4A class IVa	719	4	TRUE	FALSE	FALSE	TRUE	TRUE	FALSE	FALSE	FALSE	FALSE	FALSE	TRUE	FALSE	Cytoplasm	0	59	CHEMBL1743082	TRASTUZUMAB EMTANSINE	TRUE	4	FALSE	Reactome	Mitotic Prometaphase	2	10	0	0	0	10	44.79
TUBB4A	ENSG00000104833	tubulin beta 4A class IVa	719	4	TRUE	FALSE	FALSE	TRUE	TRUE	FALSE	FALSE	FALSE	FALSE	FALSE	TRUE	FALSE	Cytoplasm	0	59	CHEMBL1743082	TRASTUZUMAB EMTANSINE	TRUE	4	FALSE	Reactome	Anchoring of the basal body to the plasma membrane	2	10	0	0	0	10	44.79
TUBB4A	ENSG00000104833	tubulin beta 4A class IVa	719	4	TRUE	FALSE	FALSE	TRUE	TRUE	FALSE	FALSE	FALSE	FALSE	FALSE	TRUE	FALSE	Cytoplasm	0	59	CHEMBL107	COLCHICINE	TRUE	4	FALSE	Reactome	Anchoring of the basal body to the plasma membrane	2	10	0	0	0	10	44.79
TUBB4A	ENSG00000104833	tubulin beta 4A class IVa	719	4	TRUE	FALSE	FALSE	TRUE	TRUE	FALSE	FALSE	FALSE	FALSE	FALSE	TRUE	FALSE	Cytoplasm	0	59	CHEMBL3545252	DOCETAXEL	TRUE	4	FALSE	Reactome	Anchoring of the basal body to the plasma membrane	2	10	0	0	0	10	44.79
TUBB4A	ENSG00000104833	tubulin beta 4A class IVa	719	4	TRUE	FALSE	FALSE	TRUE	TRUE	FALSE	FALSE	FALSE	FALSE	FALSE	TRUE	FALSE	Cytoplasm	0	59	CHEMBL92	DOCETAXEL	TRUE	4	FALSE	Reactome	Mitotic Prometaphase	2	10	0	0	0	10	44.79
TUBB4A	ENSG00000104833	tubulin beta 4A class IVa	719	4	TRUE	FALSE	FALSE	TRUE	TRUE	FALSE	FALSE	FALSE	FALSE	FALSE	TRUE	FALSE	Cytoplasm	0	59	CHEMBL90555	VINCRISTINE	TRUE	4	FALSE	Reactome	Mitotic Prometaphase	2	10	0	0	0	10	44.79
TUBB4A	ENSG00000104833	tubulin beta 4A class IVa	719	4	TRUE	FALSE	FALSE	TRUE	TRUE	FALSE	FALSE	FALSE	FALSE	FALSE	TRUE	FALSE	Cytoplasm	0	59	CHEMBL92	DOCETAXEL	TRUE	4	FALSE	Reactome	Mitotic Prometaphase	2	10	0	0	0	10	44.79
TUBB4A	ENSG00000104833	tubulin beta 4A class IVa	719	4	TRUE	FALSE	FALSE	TRUE	TRUE	FALSE	FALSE	FALSE	FALSE	FALSE	TRUE	FALSE	Cytoplasm	0	59	CHEMBL1683544	ERIBULIN MESYLATE	TRUE	4	FALSE	Reactome	Anchoring of the basal body to the plasma membrane	2	10	0	0	0	10	44.79
TUBB4A	ENSG00000104833	tubulin beta 4A class IVa	719	4	TRUE	FALSE	FALSE	TRUE	TRUE	FALSE	FALSE	FALSE	FALSE	FALSE	TRUE	FALSE	Cytoplasm	0	59	CHEMBL90555	VINCRISTINE	TRUE	4	FALSE	Reactome	Anchoring of the basal body to the plasma membrane	2	10	0	0	0	10	44.79
TUBB4A	ENSG00000104833	tubulin beta 4A class IVa	719	4	TRUE	FALSE	FALSE	TRUE	TRUE	FALSE	FALSE	FALSE	FALSE	FALSE	TRUE	FALSE	Cytoplasm	0	59	CHEMBL1742994	BRENTUXIMAB VEDOTIN	TRUE	4	FALSE	Reactome	Mitotic Prometaphase	2	10	0	0	0	10	44.79
TUBB4A	ENSG00000104833	tubulin beta 4A class IVa	719	4	TRUE	FALSE	FALSE	TRUE	TRUE	FALSE	FALSE	FALSE	FALSE	FALSE	TRUE	FALSE	Cytoplasm	0	59	CHEMBL92	DOCETAXEL	TRUE	4	FALSE	Reactome	Anchoring of the basal body to the plasma membrane	2	10	0	0	0	10	44.79
TUBB4A	ENSG00000104833	tubulin beta 4A class IVa	719	4	TRUE	FALSE	FALSE	TRUE	TRUE	FALSE	FALSE	FALSE	FALSE	FALSE	TRUE	FALSE	Cytoplasm	0	59	CHEMBL428647	PACLITAXEL	TRUE	4	FALSE	Reactome	Anchoring of the basal body to the plasma membrane	2	10	0	0	0	10	44.79
TUBB4A	ENSG00000104833	tubulin beta 4A class IVa	719	4	TRUE	FALSE	FALSE	TRUE	TRUE	FALSE	FALSE	FALSE	FALSE	FALSE	TRUE	FALSE	Cytoplasm	0	59	CHEMBL92	DOCETAXEL	TRUE	4	FALSE	Reactome	Mitotic Prometaphase	2	10	0	0	0	10	44.79
TUBB4A	ENSG00000104833	tubulin beta 4A class IVa	719	4	TRUE	FALSE	FALSE	TRUE	TRUE	FALSE	FALSE	FALSE	FALSE	FALSE	TRUE	FALSE	Cytoplasm	0	59	CHEMBL159	VINBLASTINE	TRUE	4	FALSE	Reactome	Mitotic Prometaphase	2	10	0	0	0	10	44.79
TUBB4A	ENSG00000104833	tubulin beta 4A class IVa	719	4	TRUE	FALSE	FALSE	TRUE	TRUE	FALSE	FALSE	FALSE	FALSE	FALSE	TRUE	FALSE	Cytoplasm	0	59	CHEMBL3545252	DOCETAXEL	TRUE	4	FALSE	Reactome	Mitotic Prometaphase	2	10	0	0	0	10	44.79
TUBB4A	ENSG00000104833	tubulin beta 4A class IVa	719	4	TRUE	FALSE	FALSE	TRUE	TRUE	FALSE	FALSE	FALSE	FALSE	FALSE	TRUE	FALSE	Cytoplasm	0	59	CHEMBL1201752	IXABEPILONE	TRUE	4	FALSE	Reactome	Mitotic Prometaphase	2	10	0	0	0	10	44.79
TUBB4A	ENSG00000104833	tubulin beta 4A class IVa	719	4	TRUE	FALSE	FALSE	TRUE	TRUE	FALSE	FALSE	FALSE	FALSE	FALSE	TRUE	FALSE	Cytoplasm	0	59	CHEMBL428647	PACLITAXEL	TRUE	4	FALSE	Reactome	Mitotic Prometaphase	2	10	0	0	0	10	44.79
TUBB4A	ENSG00000104833	tubulin beta 4A class IVa	719	4	TRUE	FALSE	FALSE	TRUE	TRUE	FALSE	FALSE	FALSE	FALSE	FALSE	TRUE	FALSE	Cytoplasm	0	59	CHEMBL3545252	DOCETAXEL	TRUE	4	FALSE	Reactome	Mitotic Prometaphase	2	10	0	0	0	10	44.79
TUBB4A	ENSG00000104833	tubulin beta 4A class IVa	719	4	TRUE	FALSE	FALSE	TRUE	TRUE	FALSE	FALSE	FALSE	FALSE	FALSE	TRUE	FALSE	Cytoplasm	0	59	CHEMBL3545252	DOCETAXEL	TRUE	4	FALSE	Reactome	Mitotic Prometaphase	2	10	0	0	0	10	44.79
TUBB4A	ENSG00000104833	tubulin beta 4A class IVa	719	4	TRUE	FALSE	FALSE	TRUE	TRUE	FALSE	FALSE	FALSE	FALSE	FALSE	TRUE	FALSE	Cytoplasm	0	59	CHEMBL3545252	DOCETAXEL	TRUE	4	FALSE	Reactome	Mitotic Prometaphase	2	10	0	0	0	10	44.79
TUBB4A	ENSG00000104833	tubulin beta 4A class IVa	719	4	TRUE	FALSE	FALSE	TRUE	TRUE	FALSE	FALSE	FALSE	FALSE	FALSE	TRUE	FALSE	Cytoplasm	0	59	CHEMBL428647	PACLITAXEL	TRUE	4	FALSE	Reactome	Mitotic Prometaphase	2	10	0	0	0	10	44.79
TUBB4A	ENSG00000104833	tubulin beta 4A class IVa	719	4	TRUE	FALSE	FALSE	TRUE	TRUE	FALSE	FALSE	FALSE	FALSE	FALSE	TRUE	FALSE	Cytoplasm	0	59	CHEMBL1683590	ERIBULIN	TRUE	4	FALSE	Reactome	Mitotic Prometaphase	2	10	0	0	0	10	44.79
TUBB4A	ENSG00000104833	tubulin beta 4A class IVa	719	4	TRUE	FALSE	FALSE	TRUE	TRUE	FALSE	FALSE	FALSE	FALSE	FALSE	TRUE	FALSE	Cytoplasm	0	59	CHEMBL428647	PACLITAXEL	TRUE	4	FALSE	Reactome	Mitotic Prometaphase	2	10	0	0	0	10	44.79
TUBB4A	ENSG00000104833	tubulin beta 4A class IVa	719	4	TRUE	FALSE	FALSE	TRUE	TRUE	FALSE	FALSE	FALSE	FALSE	FALSE	TRUE	FALSE	Cytoplasm	0	59	CHEMBL90555	VINCRISTINE	TRUE	4	FALSE	Reactome	Mitotic Prometaphase	2	10	0	0	0	10	44.79
TUBB4A	ENSG00000104833	tubulin beta 4A class IVa	719	4	TRUE	FALSE	FALSE	TRUE	TRUE	FALSE	FALSE	FALSE	FALSE	FALSE	TRUE	FALSE	Cytoplasm	0	59	CHEMBL3545252	DOCETAXEL	TRUE	4	FALSE	Reactome	Anchoring of the basal body to the plasma membrane	2	10	0	0	0	10	44.79
TUBB4A	ENSG00000104833	tubulin beta 4A class IVa	719	4	TRUE	FALSE	FALSE	TRUE	TRUE	FALSE	FALSE	FALSE	FALSE	FALSE	TRUE	FALSE	Cytoplasm	0	59	CHEMBL107	COLCHICINE	TRUE	4	FALSE	Reactome	Mitotic Prometaphase	2	10	0	0	0	10	44.79
TUBB4A	ENSG00000104833	tubulin beta 4A class IVa	719	4	TRUE	FALSE	FALSE	TRUE	TRUE	FALSE	FALSE	FALSE	FALSE	FALSE	TRUE	FALSE	Cytoplasm	0	59	CHEMBL1743082	TRASTUZUMAB EMTANSINE	TRUE	4	FALSE	Reactome	Mitotic Prometaphase	2	10	0	0	0	10	44.79
TUBB4A	ENSG00000104833	tubulin beta 4A class IVa	719	4	TRUE	FALSE	FALSE	TRUE	TRUE	FALSE	FALSE	FALSE	FALSE	FALSE	TRUE	FALSE	Cytoplasm	0	59	CHEMBL92	DOCETAXEL	TRUE	4	FALSE	Reactome	Anchoring of the basal body to the plasma membrane	2	10	0	0	0	10	44.79
TUBB4A	ENSG00000104833	tubulin beta 4A class IVa	719	4	TRUE	FALSE	FALSE	TRUE	TRUE	FALSE	FALSE	FALSE	FALSE	FALSE	TRUE	FALSE	Cytoplasm	0	59	CHEMBL1683590	ERIBULIN	TRUE	4	FALSE	Reactome	Anchoring of the basal body to the plasma membrane	2	10	0	0	0	10	44.79
TUBB4A	ENSG00000104833	tubulin beta 4A class IVa	719	4	TRUE	FALSE	FALSE	TRUE	TRUE	FALSE	FALSE	FALSE	FALSE	FALSE	TRUE	FALSE	Cytoplasm	0	59	CHEMBL92	DOCETAXEL	TRUE	4	FALSE	Reactome	Anchoring of the basal body to the plasma membrane	2	10	0	0	0	10	44.79
TUBB4A	ENSG00000104833	tubulin beta 4A class IVa	719	4	TRUE	FALSE	FALSE	TRUE	TRUE	FALSE	FALSE	FALSE	FALSE	FALSE	TRUE	FALSE	Cytoplasm	0	59	CHEMBL428647	PACLITAXEL	TRUE	4	FALSE	Reactome	Mitotic Prometaphase	2	10	0	0	0	10	44.79
RPS6KB2	ENSG00000175634	ribosomal protein S6 kinase B2	62	3	FALSE	FALSE	TRUE	TRUE	FALSE	FALSE	FALSE	FALSE	FALSE	FALSE	FALSE	FALSE	Cytoplasm	0	4	CHEMBL3544935	XL-418	FALSE	1	FALSE	KEGG	HIF-1 signaling pathway	1	0	0	0	4	0	44.62
RPS6KB2	ENSG00000175634	ribosomal protein S6 kinase B2	62	3	FALSE	FALSE	TRUE	TRUE	FALSE	FALSE	FALSE	FALSE	FALSE	FALSE	FALSE	FALSE	Cytoplasm	0	4	CHEMBL3545134	LY-2780301	FALSE	1	FALSE	KEGG	HIF-1 signaling pathway	1	0	0	0	4	0	44.62
RPS6KB2	ENSG00000175634	ribosomal protein S6 kinase B2	62	3	FALSE	FALSE	TRUE	TRUE	FALSE	FALSE	FALSE	FALSE	FALSE	FALSE	FALSE	FALSE	Cytoplasm	0	4	CHEMBL3545134	LY-2780301	FALSE	1	FALSE	KEGG	HIF-1 signaling pathway	1	0	0	0	4	0	44.62
RPS6KB2	ENSG00000175634	ribosomal protein S6 kinase B2	62	3	FALSE	FALSE	TRUE	TRUE	FALSE	FALSE	FALSE	FALSE	FALSE	FALSE	FALSE	FALSE	Cytoplasm	0	4	CHEMBL3545003	MSC-2363318A	FALSE	1	FALSE	KEGG	HIF-1 signaling pathway	1	0	0	0	4	0	44.62
RPS6KB2	ENSG00000175634	ribosomal protein S6 kinase B2	62	3	FALSE	FALSE	TRUE	TRUE	FALSE	FALSE	FALSE	FALSE	FALSE	FALSE	FALSE	FALSE	Cytoplasm	0	4	CHEMBL4650277	TAS0612	FALSE	1	FALSE	KEGG	HIF-1 signaling pathway	1	0	0	0	4	0	44.62
CCR2	ENSG00000121807	C-C motif chemokine receptor 2	752	6	FALSE	TRUE	FALSE	TRUE	FALSE	TRUE	FALSE	FALSE	FALSE	FALSE	TRUE	FALSE	Cell membrane	0	10	CHEMBL3707228	PLOZALIZUMAB	FALSE	2	FALSE	Reactome	Cytokine Signaling in Immune system	1	0	1	7	0	0	44.52
CCR2	ENSG00000121807	C-C motif chemokine receptor 2	752	6	FALSE	TRUE	FALSE	TRUE	FALSE	TRUE	FALSE	FALSE	FALSE	FALSE	TRUE	FALSE	Cell membrane	0	10	CHEMBL3545221	AZD2423	FALSE	2	FALSE	Reactome	Cytokine Signaling in Immune system	1	0	1	7	0	0	44.52
CCR2	ENSG00000121807	C-C motif chemokine receptor 2	752	6	FALSE	TRUE	FALSE	TRUE	FALSE	TRUE	FALSE	FALSE	FALSE	FALSE	TRUE	FALSE	Cell membrane	0	10	CHEMBL2110727	CENICRIVIROC	FALSE	3	FALSE	Reactome	Cytokine Signaling in Immune system	1	0	1	7	0	0	44.52
CCR2	ENSG00000121807	C-C motif chemokine receptor 2	752	6	FALSE	TRUE	FALSE	TRUE	FALSE	TRUE	FALSE	FALSE	FALSE	FALSE	TRUE	FALSE	Cell membrane	0	10	CHEMBL2110727	CENICRIVIROC	FALSE	3	FALSE	Reactome	Cytokine Signaling in Immune system	1	0	1	7	0	0	44.52
CCR2	ENSG00000121807	C-C motif chemokine receptor 2	752	6	FALSE	TRUE	FALSE	TRUE	FALSE	TRUE	FALSE	FALSE	FALSE	FALSE	TRUE	FALSE	Cell membrane	0	10	CHEMBL3545221	AZD2423	FALSE	2	FALSE	Reactome	Cytokine Signaling in Immune system	1	0	1	7	0	0	44.52
CCR2	ENSG00000121807	C-C motif chemokine receptor 2	752	6	FALSE	TRUE	FALSE	TRUE	FALSE	TRUE	FALSE	FALSE	FALSE	FALSE	TRUE	FALSE	Cell membrane	0	10	CHEMBL2178573	ILACIRNON	FALSE	2	FALSE	Reactome	Cytokine Signaling in Immune system	1	0	1	7	0	0	44.52
CCR2	ENSG00000121807	C-C motif chemokine receptor 2	752	6	FALSE	TRUE	FALSE	TRUE	FALSE	TRUE	FALSE	FALSE	FALSE	FALSE	TRUE	FALSE	Cell membrane	0	10	CHEMBL4297538	MK-0812	FALSE	2	FALSE	Reactome	Cytokine Signaling in Immune system	1	0	1	7	0	0	44.52
CCR2	ENSG00000121807	C-C motif chemokine receptor 2	752	6	FALSE	TRUE	FALSE	TRUE	FALSE	TRUE	FALSE	FALSE	FALSE	FALSE	TRUE	FALSE	Cell membrane	0	10	CHEMBL4650501	PF-4136309	FALSE	2	FALSE	Reactome	Cytokine Signaling in Immune system	1	0	1	7	0	0	44.52
CCR2	ENSG00000121807	C-C motif chemokine receptor 2	752	6	FALSE	TRUE	FALSE	TRUE	FALSE	TRUE	FALSE	FALSE	FALSE	FALSE	TRUE	FALSE	Cell membrane	0	10	CHEMBL3707228	PLOZALIZUMAB	FALSE	2	FALSE	Reactome	Cytokine Signaling in Immune system	1	0	1	7	0	0	44.52
CCR2	ENSG00000121807	C-C motif chemokine receptor 2	752	6	FALSE	TRUE	FALSE	TRUE	FALSE	TRUE	FALSE	FALSE	FALSE	FALSE	TRUE	FALSE	Cell membrane	0	10	CHEMBL2204263	JNJ-41443532	FALSE	2	FALSE	Reactome	Cytokine Signaling in Immune system	1	0	1	7	0	0	44.52
CCR2	ENSG00000121807	C-C motif chemokine receptor 2	752	6	FALSE	TRUE	FALSE	TRUE	FALSE	TRUE	FALSE	FALSE	FALSE	FALSE	TRUE	FALSE	Cell membrane	0	10	CHEMBL3707228	PLOZALIZUMAB	FALSE	2	FALSE	Reactome	Cytokine Signaling in Immune system	1	0	1	7	0	0	44.52
CCR2	ENSG00000121807	C-C motif chemokine receptor 2	752	6	FALSE	TRUE	FALSE	TRUE	FALSE	TRUE	FALSE	FALSE	FALSE	FALSE	TRUE	FALSE	Cell membrane	0	10	CHEMBL4650501	PF-4136309	FALSE	2	FALSE	Reactome	Cytokine Signaling in Immune system	1	0	1	7	0	0	44.52
CCR2	ENSG00000121807	C-C motif chemokine receptor 2	752	6	FALSE	TRUE	FALSE	TRUE	FALSE	TRUE	FALSE	FALSE	FALSE	FALSE	TRUE	FALSE	Cell membrane	0	10	CHEMBL2110727	CENICRIVIROC	FALSE	3	FALSE	Reactome	Cytokine Signaling in Immune system	1	0	1	7	0	0	44.52
CCR2	ENSG00000121807	C-C motif chemokine receptor 2	752	6	FALSE	TRUE	FALSE	TRUE	FALSE	TRUE	FALSE	FALSE	FALSE	FALSE	TRUE	FALSE	Cell membrane	0	10	CHEMBL2178573	ILACIRNON	FALSE	2	FALSE	Reactome	Cytokine Signaling in Immune system	1	0	1	7	0	0	44.52
CCR2	ENSG00000121807	C-C motif chemokine receptor 2	752	6	FALSE	TRUE	FALSE	TRUE	FALSE	TRUE	FALSE	FALSE	FALSE	FALSE	TRUE	FALSE	Cell membrane	0	10	CHEMBL3707228	PLOZALIZUMAB	FALSE	2	FALSE	Reactome	Cytokine Signaling in Immune system	1	0	1	7	0	0	44.52
CCR2	ENSG00000121807	C-C motif chemokine receptor 2	752	6	FALSE	TRUE	FALSE	TRUE	FALSE	TRUE	FALSE	FALSE	FALSE	FALSE	TRUE	FALSE	Cell membrane	0	10	CHEMBL4594419	BMS-813160	FALSE	2	FALSE	Reactome	Cytokine Signaling in Immune system	1	0	1	7	0	0	44.52
CCR2	ENSG00000121807	C-C motif chemokine receptor 2	752	6	FALSE	TRUE	FALSE	TRUE	FALSE	TRUE	FALSE	FALSE	FALSE	FALSE	TRUE	FALSE	Cell membrane	0	10	CHEMBL2110727	CENICRIVIROC	FALSE	3	FALSE	Reactome	Cytokine Signaling in Immune system	1	0	1	7	0	0	44.52
CCR2	ENSG00000121807	C-C motif chemokine receptor 2	752	6	FALSE	TRUE	FALSE	TRUE	FALSE	TRUE	FALSE	FALSE	FALSE	FALSE	TRUE	FALSE	Cell membrane	0	10	CHEMBL4650501	PF-4136309	FALSE	2	FALSE	Reactome	Cytokine Signaling in Immune system	1	0	1	7	0	0	44.52
CCR2	ENSG00000121807	C-C motif chemokine receptor 2	752	6	FALSE	TRUE	FALSE	TRUE	FALSE	TRUE	FALSE	FALSE	FALSE	FALSE	TRUE	FALSE	Cell membrane	0	10	CHEMBL2110727	CENICRIVIROC	FALSE	3	FALSE	Reactome	Cytokine Signaling in Immune system	1	0	1	7	0	0	44.52
CCR2	ENSG00000121807	C-C motif chemokine receptor 2	752	6	FALSE	TRUE	FALSE	TRUE	FALSE	TRUE	FALSE	FALSE	FALSE	FALSE	TRUE	FALSE	Cell membrane	0	10	CHEMBL2178573	ILACIRNON	FALSE	2	FALSE	Reactome	Cytokine Signaling in Immune system	1	0	1	7	0	0	44.52
CCR2	ENSG00000121807	C-C motif chemokine receptor 2	752	6	FALSE	TRUE	FALSE	TRUE	FALSE	TRUE	FALSE	FALSE	FALSE	FALSE	TRUE	FALSE	Cell membrane	0	10	CHEMBL4297538	MK-0812	FALSE	2	FALSE	Reactome	Cytokine Signaling in Immune system	1	0	1	7	0	0	44.52
CCR2	ENSG00000121807	C-C motif chemokine receptor 2	752	6	FALSE	TRUE	FALSE	TRUE	FALSE	TRUE	FALSE	FALSE	FALSE	FALSE	TRUE	FALSE	Cell membrane	0	10	CHEMBL4594419	BMS-813160	FALSE	2	FALSE	Reactome	Cytokine Signaling in Immune system	1	0	1	7	0	0	44.52
CCR2	ENSG00000121807	C-C motif chemokine receptor 2	752	6	FALSE	TRUE	FALSE	TRUE	FALSE	TRUE	FALSE	FALSE	FALSE	FALSE	TRUE	FALSE	Cell membrane	0	10	CHEMBL3707228	PLOZALIZUMAB	FALSE	2	FALSE	Reactome	Cytokine Signaling in Immune system	1	0	1	7	0	0	44.52
CCR2	ENSG00000121807	C-C motif chemokine receptor 2	752	6	FALSE	TRUE	FALSE	TRUE	FALSE	TRUE	FALSE	FALSE	FALSE	FALSE	TRUE	FALSE	Cell membrane	0	10	CHEMBL2110727	CENICRIVIROC	FALSE	3	FALSE	Reactome	Cytokine Signaling in Immune system	1	0	1	7	0	0	44.52
CCR2	ENSG00000121807	C-C motif chemokine receptor 2	752	6	FALSE	TRUE	FALSE	TRUE	FALSE	TRUE	FALSE	FALSE	FALSE	FALSE	TRUE	FALSE	Cell membrane	0	10	CHEMBL2110727	CENICRIVIROC	FALSE	3	FALSE	Reactome	Cytokine Signaling in Immune system	1	0	1	7	0	0	44.52
MAPK1	ENSG00000100030	mitogen-activated protein kinase 1	442	5	FALSE	TRUE	FALSE	TRUE	FALSE	FALSE	FALSE	FALSE	FALSE	FALSE	FALSE	FALSE	Cytoplasm	2	5	CHEMBL4650285	TEMUTERKIB	FALSE	2	FALSE	Reactome	Cytokine Signaling in Immune system	2	0	0	2	3	0	44.42
MAPK1	ENSG00000100030	mitogen-activated protein kinase 1	442	5	FALSE	TRUE	FALSE	TRUE	FALSE	FALSE	FALSE	FALSE	FALSE	FALSE	FALSE	FALSE	Cytoplasm	2	5	CHEMBL4650285	TEMUTERKIB	FALSE	2	FALSE	KEGG	HIF-1 signaling pathway	2	0	0	2	3	0	44.42
MAPK1	ENSG00000100030	mitogen-activated protein kinase 1	442	5	FALSE	TRUE	FALSE	TRUE	FALSE	FALSE	FALSE	FALSE	FALSE	FALSE	FALSE	FALSE	Cytoplasm	2	5	CHEMBL3590106	ULIXERTINIB	FALSE	2	FALSE	Reactome	Cytokine Signaling in Immune system	2	0	0	2	3	0	44.42
MAPK1	ENSG00000100030	mitogen-activated protein kinase 1	442	5	FALSE	TRUE	FALSE	TRUE	FALSE	FALSE	FALSE	FALSE	FALSE	FALSE	FALSE	FALSE	Cytoplasm	2	5	CHEMBL3590106	ULIXERTINIB	FALSE	2	FALSE	Reactome	Cytokine Signaling in Immune system	2	0	0	2	3	0	44.42
MAPK1	ENSG00000100030	mitogen-activated protein kinase 1	442	5	FALSE	TRUE	FALSE	TRUE	FALSE	FALSE	FALSE	FALSE	FALSE	FALSE	FALSE	FALSE	Cytoplasm	2	5	CHEMBL3545001	MK-8353	FALSE	1	FALSE	KEGG	HIF-1 signaling pathway	2	0	0	2	3	0	44.42
MAPK1	ENSG00000100030	mitogen-activated protein kinase 1	442	5	FALSE	TRUE	FALSE	TRUE	FALSE	FALSE	FALSE	FALSE	FALSE	FALSE	FALSE	FALSE	Cytoplasm	2	5	CHEMBL3590106	ULIXERTINIB	FALSE	2	FALSE	KEGG	HIF-1 signaling pathway	2	0	0	2	3	0	44.42
MAPK1	ENSG00000100030	mitogen-activated protein kinase 1	442	5	FALSE	TRUE	FALSE	TRUE	FALSE	FALSE	FALSE	FALSE	FALSE	FALSE	FALSE	FALSE	Cytoplasm	2	5	CHEMBL4650285	TEMUTERKIB	FALSE	2	FALSE	KEGG	HIF-1 signaling pathway	2	0	0	2	3	0	44.42
MAPK1	ENSG00000100030	mitogen-activated protein kinase 1	442	5	FALSE	TRUE	FALSE	TRUE	FALSE	FALSE	FALSE	FALSE	FALSE	FALSE	FALSE	FALSE	Cytoplasm	2	5	CHEMBL3590106	ULIXERTINIB	FALSE	2	FALSE	Reactome	Cytokine Signaling in Immune system	2	0	0	2	3	0	44.42
MAPK1	ENSG00000100030	mitogen-activated protein kinase 1	442	5	FALSE	TRUE	FALSE	TRUE	FALSE	FALSE	FALSE	FALSE	FALSE	FALSE	FALSE	FALSE	Cytoplasm	2	5	CHEMBL3590106	ULIXERTINIB	FALSE	2	FALSE	KEGG	HIF-1 signaling pathway	2	0	0	2	3	0	44.42
MAPK1	ENSG00000100030	mitogen-activated protein kinase 1	442	5	FALSE	TRUE	FALSE	TRUE	FALSE	FALSE	FALSE	FALSE	FALSE	FALSE	FALSE	FALSE	Cytoplasm	2	5	CHEMBL3590106	ULIXERTINIB	FALSE	2	FALSE	KEGG	HIF-1 signaling pathway	2	0	0	2	3	0	44.42
MAPK1	ENSG00000100030	mitogen-activated protein kinase 1	442	5	FALSE	TRUE	FALSE	TRUE	FALSE	FALSE	FALSE	FALSE	FALSE	FALSE	FALSE	FALSE	Cytoplasm	2	5	CHEMBL3590106	ULIXERTINIB	FALSE	2	FALSE	KEGG	HIF-1 signaling pathway	2	0	0	2	3	0	44.42
MAPK1	ENSG00000100030	mitogen-activated protein kinase 1	442	5	FALSE	TRUE	FALSE	TRUE	FALSE	FALSE	FALSE	FALSE	FALSE	FALSE	FALSE	FALSE	Cytoplasm	2	5	CHEMBL3590106	ULIXERTINIB	FALSE	2	FALSE	Reactome	Cytokine Signaling in Immune system	2	0	0	2	3	0	44.42
MAPK1	ENSG00000100030	mitogen-activated protein kinase 1	442	5	FALSE	TRUE	FALSE	TRUE	FALSE	FALSE	FALSE	FALSE	FALSE	FALSE	FALSE	FALSE	Cytoplasm	2	5	CHEMBL3545001	MK-8353	FALSE	1	FALSE	Reactome	Cytokine Signaling in Immune system	2	0	0	2	3	0	44.42
MAPK1	ENSG00000100030	mitogen-activated protein kinase 1	442	5	FALSE	TRUE	FALSE	TRUE	FALSE	FALSE	FALSE	FALSE	FALSE	FALSE	FALSE	FALSE	Cytoplasm	2	5	CHEMBL3590106	ULIXERTINIB	FALSE	2	FALSE	KEGG	HIF-1 signaling pathway	2	0	0	2	3	0	44.42
MAPK1	ENSG00000100030	mitogen-activated protein kinase 1	442	5	FALSE	TRUE	FALSE	TRUE	FALSE	FALSE	FALSE	FALSE	FALSE	FALSE	FALSE	FALSE	Cytoplasm	2	5	CHEMBL3545001	MK-8353	FALSE	1	FALSE	KEGG	HIF-1 signaling pathway	2	0	0	2	3	0	44.42
MAPK1	ENSG00000100030	mitogen-activated protein kinase 1	442	5	FALSE	TRUE	FALSE	TRUE	FALSE	FALSE	FALSE	FALSE	FALSE	FALSE	FALSE	FALSE	Cytoplasm	2	5	CHEMBL3590106	ULIXERTINIB	FALSE	2	FALSE	KEGG	HIF-1 signaling pathway	2	0	0	2	3	0	44.42
MAPK1	ENSG00000100030	mitogen-activated protein kinase 1	442	5	FALSE	TRUE	FALSE	TRUE	FALSE	FALSE	FALSE	FALSE	FALSE	FALSE	FALSE	FALSE	Cytoplasm	2	5	CHEMBL4650285	TEMUTERKIB	FALSE	2	FALSE	Reactome	Cytokine Signaling in Immune system	2	0	0	2	3	0	44.42
MAPK1	ENSG00000100030	mitogen-activated protein kinase 1	442	5	FALSE	TRUE	FALSE	TRUE	FALSE	FALSE	FALSE	FALSE	FALSE	FALSE	FALSE	FALSE	Cytoplasm	2	5	CHEMBL4650285	TEMUTERKIB	FALSE	2	FALSE	Reactome	Cytokine Signaling in Immune system	2	0	0	2	3	0	44.42
MAPK1	ENSG00000100030	mitogen-activated protein kinase 1	442	5	FALSE	TRUE	FALSE	TRUE	FALSE	FALSE	FALSE	FALSE	FALSE	FALSE	FALSE	FALSE	Cytoplasm	2	5	CHEMBL3590106	ULIXERTINIB	FALSE	2	FALSE	KEGG	HIF-1 signaling pathway	2	0	0	2	3	0	44.42
MAPK1	ENSG00000100030	mitogen-activated protein kinase 1	442	5	FALSE	TRUE	FALSE	TRUE	FALSE	FALSE	FALSE	FALSE	FALSE	FALSE	FALSE	FALSE	Cytoplasm	2	5	CHEMBL4650284	KO-947	FALSE	1	FALSE	KEGG	HIF-1 signaling pathway	2	0	0	2	3	0	44.42
MAPK1	ENSG00000100030	mitogen-activated protein kinase 1	442	5	FALSE	TRUE	FALSE	TRUE	FALSE	FALSE	FALSE	FALSE	FALSE	FALSE	FALSE	FALSE	Cytoplasm	2	5	CHEMBL3545001	MK-8353	FALSE	1	FALSE	Reactome	Cytokine Signaling in Immune system	2	0	0	2	3	0	44.42
MAPK1	ENSG00000100030	mitogen-activated protein kinase 1	442	5	FALSE	TRUE	FALSE	TRUE	FALSE	FALSE	FALSE	FALSE	FALSE	FALSE	FALSE	FALSE	Cytoplasm	2	5	CHEMBL3590106	ULIXERTINIB	FALSE	2	FALSE	KEGG	HIF-1 signaling pathway	2	0	0	2	3	0	44.42
MAPK1	ENSG00000100030	mitogen-activated protein kinase 1	442	5	FALSE	TRUE	FALSE	TRUE	FALSE	FALSE	FALSE	FALSE	FALSE	FALSE	FALSE	FALSE	Cytoplasm	2	5	CHEMBL3590106	ULIXERTINIB	FALSE	2	FALSE	KEGG	HIF-1 signaling pathway	2	0	0	2	3	0	44.42
MAPK1	ENSG00000100030	mitogen-activated protein kinase 1	442	5	FALSE	TRUE	FALSE	TRUE	FALSE	FALSE	FALSE	FALSE	FALSE	FALSE	FALSE	FALSE	Cytoplasm	2	5	CHEMBL3544964	RAVOXERTINIB	FALSE	1	FALSE	KEGG	HIF-1 signaling pathway	2	0	0	2	3	0	44.42
MAPK1	ENSG00000100030	mitogen-activated protein kinase 1	442	5	FALSE	TRUE	FALSE	TRUE	FALSE	FALSE	FALSE	FALSE	FALSE	FALSE	FALSE	FALSE	Cytoplasm	2	5	CHEMBL3545001	MK-8353	FALSE	1	FALSE	KEGG	HIF-1 signaling pathway	2	0	0	2	3	0	44.42
MAPK1	ENSG00000100030	mitogen-activated protein kinase 1	442	5	FALSE	TRUE	FALSE	TRUE	FALSE	FALSE	FALSE	FALSE	FALSE	FALSE	FALSE	FALSE	Cytoplasm	2	5	CHEMBL4650285	TEMUTERKIB	FALSE	2	FALSE	Reactome	Cytokine Signaling in Immune system	2	0	0	2	3	0	44.42
MAPK1	ENSG00000100030	mitogen-activated protein kinase 1	442	5	FALSE	TRUE	FALSE	TRUE	FALSE	FALSE	FALSE	FALSE	FALSE	FALSE	FALSE	FALSE	Cytoplasm	2	5	CHEMBL3590106	ULIXERTINIB	FALSE	2	FALSE	Reactome	Cytokine Signaling in Immune system	2	0	0	2	3	0	44.42
MAPK1	ENSG00000100030	mitogen-activated protein kinase 1	442	5	FALSE	TRUE	FALSE	TRUE	FALSE	FALSE	FALSE	FALSE	FALSE	FALSE	FALSE	FALSE	Cytoplasm	2	5	CHEMBL3590106	ULIXERTINIB	FALSE	2	FALSE	Reactome	Cytokine Signaling in Immune system	2	0	0	2	3	0	44.42
MAPK1	ENSG00000100030	mitogen-activated protein kinase 1	442	5	FALSE	TRUE	FALSE	TRUE	FALSE	FALSE	FALSE	FALSE	FALSE	FALSE	FALSE	FALSE	Cytoplasm	2	5	CHEMBL4650285	TEMUTERKIB	FALSE	2	FALSE	KEGG	HIF-1 signaling pathway	2	0	0	2	3	0	44.42
MAPK1	ENSG00000100030	mitogen-activated protein kinase 1	442	5	FALSE	TRUE	FALSE	TRUE	FALSE	FALSE	FALSE	FALSE	FALSE	FALSE	FALSE	FALSE	Cytoplasm	2	5	CHEMBL3545001	MK-8353	FALSE	1	FALSE	Reactome	Cytokine Signaling in Immune system	2	0	0	2	3	0	44.42
MAPK1	ENSG00000100030	mitogen-activated protein kinase 1	442	5	FALSE	TRUE	FALSE	TRUE	FALSE	FALSE	FALSE	FALSE	FALSE	FALSE	FALSE	FALSE	Cytoplasm	2	5	CHEMBL4650285	TEMUTERKIB	FALSE	2	FALSE	KEGG	HIF-1 signaling pathway	2	0	0	2	3	0	44.42
MAPK1	ENSG00000100030	mitogen-activated protein kinase 1	442	5	FALSE	TRUE	FALSE	TRUE	FALSE	FALSE	FALSE	FALSE	FALSE	FALSE	FALSE	FALSE	Cytoplasm	2	5	CHEMBL3544964	RAVOXERTINIB	FALSE	1	FALSE	Reactome	Cytokine Signaling in Immune system	2	0	0	2	3	0	44.42
MAPK1	ENSG00000100030	mitogen-activated protein kinase 1	442	5	FALSE	TRUE	FALSE	TRUE	FALSE	FALSE	FALSE	FALSE	FALSE	FALSE	FALSE	FALSE	Cytoplasm	2	5	CHEMBL4650285	TEMUTERKIB	FALSE	2	FALSE	Reactome	Cytokine Signaling in Immune system	2	0	0	2	3	0	44.42
MAPK1	ENSG00000100030	mitogen-activated protein kinase 1	442	5	FALSE	TRUE	FALSE	TRUE	FALSE	FALSE	FALSE	FALSE	FALSE	FALSE	FALSE	FALSE	Cytoplasm	2	5	CHEMBL4650284	KO-947	FALSE	1	FALSE	Reactome	Cytokine Signaling in Immune system	2	0	0	2	3	0	44.42
MAPK1	ENSG00000100030	mitogen-activated protein kinase 1	442	5	FALSE	TRUE	FALSE	TRUE	FALSE	FALSE	FALSE	FALSE	FALSE	FALSE	FALSE	FALSE	Cytoplasm	2	5	CHEMBL3590106	ULIXERTINIB	FALSE	2	FALSE	Reactome	Cytokine Signaling in Immune system	2	0	0	2	3	0	44.42
MAPK1	ENSG00000100030	mitogen-activated protein kinase 1	442	5	FALSE	TRUE	FALSE	TRUE	FALSE	FALSE	FALSE	FALSE	FALSE	FALSE	FALSE	FALSE	Cytoplasm	2	5	CHEMBL3590106	ULIXERTINIB	FALSE	2	FALSE	Reactome	Cytokine Signaling in Immune system	2	0	0	2	3	0	44.42
MAPK1	ENSG00000100030	mitogen-activated protein kinase 1	442	5	FALSE	TRUE	FALSE	TRUE	FALSE	FALSE	FALSE	FALSE	FALSE	FALSE	FALSE	FALSE	Cytoplasm	2	5	CHEMBL4650285	TEMUTERKIB	FALSE	2	FALSE	KEGG	HIF-1 signaling pathway	2	0	0	2	3	0	44.42
MAPK1	ENSG00000100030	mitogen-activated protein kinase 1	442	5	FALSE	TRUE	FALSE	TRUE	FALSE	FALSE	FALSE	FALSE	FALSE	FALSE	FALSE	FALSE	Cytoplasm	2	5	CHEMBL3590106	ULIXERTINIB	FALSE	2	FALSE	Reactome	Cytokine Signaling in Immune system	2	0	0	2	3	0	44.42
CHEK1	ENSG00000149554	checkpoint kinase 1	283	5	FALSE	TRUE	FALSE	TRUE	FALSE	FALSE	FALSE	FALSE	FALSE	FALSE	FALSE	FALSE	Nucleus	0	10	CHEMBL3039517	RABUSERTIB	FALSE	2	FALSE	Reactome	G2/M DNA damage checkpoint	8	0	0	5	1	0	44.33
CHEK1	ENSG00000149554	checkpoint kinase 1	283	5	FALSE	TRUE	FALSE	TRUE	FALSE	FALSE	FALSE	FALSE	FALSE	FALSE	FALSE	FALSE	Nucleus	0	10	CHEMBL3544911	PREXASERTIB	FALSE	2	FALSE	Reactome	G2/M DNA damage checkpoint	8	0	0	5	1	0	44.33
CHEK1	ENSG00000149554	checkpoint kinase 1	283	5	FALSE	TRUE	FALSE	TRUE	FALSE	FALSE	FALSE	FALSE	FALSE	FALSE	FALSE	FALSE	Nucleus	0	10	CHEMBL574737	UCN-01	FALSE	2	FALSE	Reactome	G2/M DNA damage checkpoint	8	0	0	5	1	0	44.33
CHEK1	ENSG00000149554	checkpoint kinase 1	283	5	FALSE	TRUE	FALSE	TRUE	FALSE	FALSE	FALSE	FALSE	FALSE	FALSE	FALSE	FALSE	Nucleus	0	10	CHEMBL574737	UCN-01	FALSE	2	FALSE	Reactome	Cell Cycle Checkpoints	8	0	0	5	1	0	44.33
CHEK1	ENSG00000149554	checkpoint kinase 1	283	5	FALSE	TRUE	FALSE	TRUE	FALSE	FALSE	FALSE	FALSE	FALSE	FALSE	FALSE	FALSE	Nucleus	0	10	CHEMBL574737	UCN-01	FALSE	2	FALSE	Reactome	HDR through Homologous Recombination (HRR)	8	0	0	5	1	0	44.33
CHEK1	ENSG00000149554	checkpoint kinase 1	283	5	FALSE	TRUE	FALSE	TRUE	FALSE	FALSE	FALSE	FALSE	FALSE	FALSE	FALSE	FALSE	Nucleus	0	10	CHEMBL574737	UCN-01	FALSE	2	FALSE	Reactome	DNA Repair	8	0	0	5	1	0	44.33
CHEK1	ENSG00000149554	checkpoint kinase 1	283	5	FALSE	TRUE	FALSE	TRUE	FALSE	FALSE	FALSE	FALSE	FALSE	FALSE	FALSE	FALSE	Nucleus	0	10	CHEMBL574737	UCN-01	FALSE	2	FALSE	Reactome	DNA Repair	8	0	0	5	1	0	44.33
CHEK1	ENSG00000149554	checkpoint kinase 1	283	5	FALSE	TRUE	FALSE	TRUE	FALSE	FALSE	FALSE	FALSE	FALSE	FALSE	FALSE	FALSE	Nucleus	0	10	CHEMBL3545377	LY-2606368	FALSE	2	FALSE	Reactome	HDR through Homologous Recombination (HRR)	8	0	0	5	1	0	44.33
CHEK1	ENSG00000149554	checkpoint kinase 1	283	5	FALSE	TRUE	FALSE	TRUE	FALSE	FALSE	FALSE	FALSE	FALSE	FALSE	FALSE	FALSE	Nucleus	0	10	CHEMBL574737	UCN-01	FALSE	2	FALSE	Reactome	HDR through Homologous Recombination (HRR)	8	0	0	5	1	0	44.33
CHEK1	ENSG00000149554	checkpoint kinase 1	283	5	FALSE	TRUE	FALSE	TRUE	FALSE	FALSE	FALSE	FALSE	FALSE	FALSE	FALSE	FALSE	Nucleus	0	10	CHEMBL3545377	LY-2606368	FALSE	2	FALSE	Reactome	G2/M DNA damage checkpoint	8	0	0	5	1	0	44.33
CHEK1	ENSG00000149554	checkpoint kinase 1	283	5	FALSE	TRUE	FALSE	TRUE	FALSE	FALSE	FALSE	FALSE	FALSE	FALSE	FALSE	FALSE	Nucleus	0	10	CHEMBL574737	UCN-01	FALSE	2	FALSE	Reactome	Cell Cycle Checkpoints	8	0	0	5	1	0	44.33
CHEK1	ENSG00000149554	checkpoint kinase 1	283	5	FALSE	TRUE	FALSE	TRUE	FALSE	FALSE	FALSE	FALSE	FALSE	FALSE	FALSE	FALSE	Nucleus	0	10	CHEMBL574737	UCN-01	FALSE	2	FALSE	Reactome	G2/M DNA damage checkpoint	8	0	0	5	1	0	44.33
CHEK1	ENSG00000149554	checkpoint kinase 1	283	5	FALSE	TRUE	FALSE	TRUE	FALSE	FALSE	FALSE	FALSE	FALSE	FALSE	FALSE	FALSE	Nucleus	0	10	CHEMBL574737	UCN-01	FALSE	2	FALSE	Reactome	G2/M DNA damage checkpoint	8	0	0	5	1	0	44.33
CHEK1	ENSG00000149554	checkpoint kinase 1	283	5	FALSE	TRUE	FALSE	TRUE	FALSE	FALSE	FALSE	FALSE	FALSE	FALSE	FALSE	FALSE	Nucleus	0	10	CHEMBL574737	UCN-01	FALSE	2	FALSE	Reactome	DNA Repair	8	0	0	5	1	0	44.33
CHEK1	ENSG00000149554	checkpoint kinase 1	283	5	FALSE	TRUE	FALSE	TRUE	FALSE	FALSE	FALSE	FALSE	FALSE	FALSE	FALSE	FALSE	Nucleus	0	10	CHEMBL3544936	XL-844	FALSE	1	FALSE	Reactome	Cell Cycle Checkpoints	8	0	0	5	1	0	44.33
CHEK1	ENSG00000149554	checkpoint kinase 1	283	5	FALSE	TRUE	FALSE	TRUE	FALSE	FALSE	FALSE	FALSE	FALSE	FALSE	FALSE	FALSE	Nucleus	0	10	CHEMBL3544911	PREXASERTIB	FALSE	2	FALSE	Reactome	HDR through Homologous Recombination (HRR)	8	0	0	5	1	0	44.33
CHEK1	ENSG00000149554	checkpoint kinase 1	283	5	FALSE	TRUE	FALSE	TRUE	FALSE	FALSE	FALSE	FALSE	FALSE	FALSE	FALSE	FALSE	Nucleus	0	10	CHEMBL574737	UCN-01	FALSE	2	FALSE	Reactome	DNA Repair	8	0	0	5	1	0	44.33
CHEK1	ENSG00000149554	checkpoint kinase 1	283	5	FALSE	TRUE	FALSE	TRUE	FALSE	FALSE	FALSE	FALSE	FALSE	FALSE	FALSE	FALSE	Nucleus	0	10	CHEMBL3544911	PREXASERTIB	FALSE	2	FALSE	Reactome	HDR through Homologous Recombination (HRR)	8	0	0	5	1	0	44.33
CHEK1	ENSG00000149554	checkpoint kinase 1	283	5	FALSE	TRUE	FALSE	TRUE	FALSE	FALSE	FALSE	FALSE	FALSE	FALSE	FALSE	FALSE	Nucleus	0	10	CHEMBL574737	UCN-01	FALSE	2	FALSE	Reactome	HDR through Homologous Recombination (HRR)	8	0	0	5	1	0	44.33
CHEK1	ENSG00000149554	checkpoint kinase 1	283	5	FALSE	TRUE	FALSE	TRUE	FALSE	FALSE	FALSE	FALSE	FALSE	FALSE	FALSE	FALSE	Nucleus	0	10	CHEMBL3544911	PREXASERTIB	FALSE	2	FALSE	Reactome	Cell Cycle Checkpoints	8	0	0	5	1	0	44.33
CHEK1	ENSG00000149554	checkpoint kinase 1	283	5	FALSE	TRUE	FALSE	TRUE	FALSE	FALSE	FALSE	FALSE	FALSE	FALSE	FALSE	FALSE	Nucleus	0	10	CHEMBL2386889	SCH-900776	FALSE	2	FALSE	Reactome	G2/M DNA damage checkpoint	8	0	0	5	1	0	44.33
CHEK1	ENSG00000149554	checkpoint kinase 1	283	5	FALSE	TRUE	FALSE	TRUE	FALSE	FALSE	FALSE	FALSE	FALSE	FALSE	FALSE	FALSE	Nucleus	0	10	CHEMBL574737	UCN-01	FALSE	2	FALSE	Reactome	Cell Cycle Checkpoints	8	0	0	5	1	0	44.33
CHEK1	ENSG00000149554	checkpoint kinase 1	283	5	FALSE	TRUE	FALSE	TRUE	FALSE	FALSE	FALSE	FALSE	FALSE	FALSE	FALSE	FALSE	Nucleus	0	10	CHEMBL3545377	LY-2606368	FALSE	2	FALSE	Reactome	G2/M DNA damage checkpoint	8	0	0	5	1	0	44.33
CHEK1	ENSG00000149554	checkpoint kinase 1	283	5	FALSE	TRUE	FALSE	TRUE	FALSE	FALSE	FALSE	FALSE	FALSE	FALSE	FALSE	FALSE	Nucleus	0	10	CHEMBL574737	UCN-01	FALSE	2	FALSE	Reactome	DNA Repair	8	0	0	5	1	0	44.33
CHEK1	ENSG00000149554	checkpoint kinase 1	283	5	FALSE	TRUE	FALSE	TRUE	FALSE	FALSE	FALSE	FALSE	FALSE	FALSE	FALSE	FALSE	Nucleus	0	10	CHEMBL3544911	PREXASERTIB	FALSE	2	FALSE	Reactome	G2/M DNA damage checkpoint	8	0	0	5	1	0	44.33
CHEK1	ENSG00000149554	checkpoint kinase 1	283	5	FALSE	TRUE	FALSE	TRUE	FALSE	FALSE	FALSE	FALSE	FALSE	FALSE	FALSE	FALSE	Nucleus	0	10	CHEMBL574737	UCN-01	FALSE	2	FALSE	Reactome	G2/M DNA damage checkpoint	8	0	0	5	1	0	44.33
CHEK1	ENSG00000149554	checkpoint kinase 1	283	5	FALSE	TRUE	FALSE	TRUE	FALSE	FALSE	FALSE	FALSE	FALSE	FALSE	FALSE	FALSE	Nucleus	0	10	CHEMBL574737	UCN-01	FALSE	2	FALSE	Reactome	DNA Repair	8	0	0	5	1	0	44.33
CHEK1	ENSG00000149554	checkpoint kinase 1	283	5	FALSE	TRUE	FALSE	TRUE	FALSE	FALSE	FALSE	FALSE	FALSE	FALSE	FALSE	FALSE	Nucleus	0	10	CHEMBL3544911	PREXASERTIB	FALSE	2	FALSE	Reactome	G2/M DNA damage checkpoint	8	0	0	5	1	0	44.33
CHEK1	ENSG00000149554	checkpoint kinase 1	283	5	FALSE	TRUE	FALSE	TRUE	FALSE	FALSE	FALSE	FALSE	FALSE	FALSE	FALSE	FALSE	Nucleus	0	10	CHEMBL3544936	XL-844	FALSE	1	FALSE	Reactome	HDR through Homologous Recombination (HRR)	8	0	0	5	1	0	44.33
CHEK1	ENSG00000149554	checkpoint kinase 1	283	5	FALSE	TRUE	FALSE	TRUE	FALSE	FALSE	FALSE	FALSE	FALSE	FALSE	FALSE	FALSE	Nucleus	0	10	CHEMBL574737	UCN-01	FALSE	2	FALSE	Reactome	G2/M DNA damage checkpoint	8	0	0	5	1	0	44.33
CHEK1	ENSG00000149554	checkpoint kinase 1	283	5	FALSE	TRUE	FALSE	TRUE	FALSE	FALSE	FALSE	FALSE	FALSE	FALSE	FALSE	FALSE	Nucleus	0	10	CHEMBL3545377	LY-2606368	FALSE	2	FALSE	Reactome	G2/M DNA damage checkpoint	8	0	0	5	1	0	44.33
CHEK1	ENSG00000149554	checkpoint kinase 1	283	5	FALSE	TRUE	FALSE	TRUE	FALSE	FALSE	FALSE	FALSE	FALSE	FALSE	FALSE	FALSE	Nucleus	0	10	CHEMBL3544936	XL-844	FALSE	1	FALSE	Reactome	DNA Repair	8	0	0	5	1	0	44.33
CHEK1	ENSG00000149554	checkpoint kinase 1	283	5	FALSE	TRUE	FALSE	TRUE	FALSE	FALSE	FALSE	FALSE	FALSE	FALSE	FALSE	FALSE	Nucleus	0	10	CHEMBL3545377	LY-2606368	FALSE	2	FALSE	Reactome	Activation of ATR in response to replication stress	8	0	0	5	1	0	44.33
CHEK1	ENSG00000149554	checkpoint kinase 1	283	5	FALSE	TRUE	FALSE	TRUE	FALSE	FALSE	FALSE	FALSE	FALSE	FALSE	FALSE	FALSE	Nucleus	0	10	CHEMBL3545377	LY-2606368	FALSE	2	FALSE	Reactome	HDR through Homologous Recombination (HRR)	8	0	0	5	1	0	44.33
CHEK1	ENSG00000149554	checkpoint kinase 1	283	5	FALSE	TRUE	FALSE	TRUE	FALSE	FALSE	FALSE	FALSE	FALSE	FALSE	FALSE	FALSE	Nucleus	0	10	CHEMBL574737	UCN-01	FALSE	2	FALSE	Reactome	G2/M DNA damage checkpoint	8	0	0	5	1	0	44.33
CHEK1	ENSG00000149554	checkpoint kinase 1	283	5	FALSE	TRUE	FALSE	TRUE	FALSE	FALSE	FALSE	FALSE	FALSE	FALSE	FALSE	FALSE	Nucleus	0	10	CHEMBL574737	UCN-01	FALSE	2	FALSE	Reactome	HDR through Homologous Recombination (HRR)	8	0	0	5	1	0	44.33
CHEK1	ENSG00000149554	checkpoint kinase 1	283	5	FALSE	TRUE	FALSE	TRUE	FALSE	FALSE	FALSE	FALSE	FALSE	FALSE	FALSE	FALSE	Nucleus	0	10	CHEMBL574737	UCN-01	FALSE	2	FALSE	Reactome	HDR through Homologous Recombination (HRR)	8	0	0	5	1	0	44.33
CHEK1	ENSG00000149554	checkpoint kinase 1	283	5	FALSE	TRUE	FALSE	TRUE	FALSE	FALSE	FALSE	FALSE	FALSE	FALSE	FALSE	FALSE	Nucleus	0	10	CHEMBL3039517	RABUSERTIB	FALSE	2	FALSE	Reactome	HDR through Homologous Recombination (HRR)	8	0	0	5	1	0	44.33
CHEK1	ENSG00000149554	checkpoint kinase 1	283	5	FALSE	TRUE	FALSE	TRUE	FALSE	FALSE	FALSE	FALSE	FALSE	FALSE	FALSE	FALSE	Nucleus	0	10	CHEMBL574737	UCN-01	FALSE	2	FALSE	Reactome	HDR through Homologous Recombination (HRR)	8	0	0	5	1	0	44.33
CHEK1	ENSG00000149554	checkpoint kinase 1	283	5	FALSE	TRUE	FALSE	TRUE	FALSE	FALSE	FALSE	FALSE	FALSE	FALSE	FALSE	FALSE	Nucleus	0	10	CHEMBL574737	UCN-01	FALSE	2	FALSE	Reactome	Cell Cycle Checkpoints	8	0	0	5	1	0	44.33
CHEK1	ENSG00000149554	checkpoint kinase 1	283	5	FALSE	TRUE	FALSE	TRUE	FALSE	FALSE	FALSE	FALSE	FALSE	FALSE	FALSE	FALSE	Nucleus	0	10	CHEMBL574737	UCN-01	FALSE	2	FALSE	Reactome	HDR through Homologous Recombination (HRR)	8	0	0	5	1	0	44.33
CHEK1	ENSG00000149554	checkpoint kinase 1	283	5	FALSE	TRUE	FALSE	TRUE	FALSE	FALSE	FALSE	FALSE	FALSE	FALSE	FALSE	FALSE	Nucleus	0	10	CHEMBL3545377	LY-2606368	FALSE	2	FALSE	Reactome	Cell Cycle Checkpoints	8	0	0	5	1	0	44.33
CHEK1	ENSG00000149554	checkpoint kinase 1	283	5	FALSE	TRUE	FALSE	TRUE	FALSE	FALSE	FALSE	FALSE	FALSE	FALSE	FALSE	FALSE	Nucleus	0	10	CHEMBL574737	UCN-01	FALSE	2	FALSE	Reactome	HDR through Homologous Recombination (HRR)	8	0	0	5	1	0	44.33
CHEK1	ENSG00000149554	checkpoint kinase 1	283	5	FALSE	TRUE	FALSE	TRUE	FALSE	FALSE	FALSE	FALSE	FALSE	FALSE	FALSE	FALSE	Nucleus	0	10	CHEMBL574737	UCN-01	FALSE	2	FALSE	Reactome	G2/M DNA damage checkpoint	8	0	0	5	1	0	44.33
CHEK1	ENSG00000149554	checkpoint kinase 1	283	5	FALSE	TRUE	FALSE	TRUE	FALSE	FALSE	FALSE	FALSE	FALSE	FALSE	FALSE	FALSE	Nucleus	0	10	CHEMBL574737	UCN-01	FALSE	2	FALSE	Reactome	G2/M DNA damage checkpoint	8	0	0	5	1	0	44.33
CHEK1	ENSG00000149554	checkpoint kinase 1	283	5	FALSE	TRUE	FALSE	TRUE	FALSE	FALSE	FALSE	FALSE	FALSE	FALSE	FALSE	FALSE	Nucleus	0	10	CHEMBL3039517	RABUSERTIB	FALSE	2	FALSE	Reactome	Cell Cycle Checkpoints	8	0	0	5	1	0	44.33
CHEK1	ENSG00000149554	checkpoint kinase 1	283	5	FALSE	TRUE	FALSE	TRUE	FALSE	FALSE	FALSE	FALSE	FALSE	FALSE	FALSE	FALSE	Nucleus	0	10	CHEMBL2386889	SCH-900776	FALSE	2	FALSE	Reactome	Cell Cycle Checkpoints	8	0	0	5	1	0	44.33
CHEK1	ENSG00000149554	checkpoint kinase 1	283	5	FALSE	TRUE	FALSE	TRUE	FALSE	FALSE	FALSE	FALSE	FALSE	FALSE	FALSE	FALSE	Nucleus	0	10	CHEMBL574737	UCN-01	FALSE	2	FALSE	Reactome	DNA Repair	8	0	0	5	1	0	44.33
CHEK1	ENSG00000149554	checkpoint kinase 1	283	5	FALSE	TRUE	FALSE	TRUE	FALSE	FALSE	FALSE	FALSE	FALSE	FALSE	FALSE	FALSE	Nucleus	0	10	CHEMBL574737	UCN-01	FALSE	2	FALSE	Reactome	G2/M DNA damage checkpoint	8	0	0	5	1	0	44.33
CHEK1	ENSG00000149554	checkpoint kinase 1	283	5	FALSE	TRUE	FALSE	TRUE	FALSE	FALSE	FALSE	FALSE	FALSE	FALSE	FALSE	FALSE	Nucleus	0	10	CHEMBL574737	UCN-01	FALSE	2	FALSE	Reactome	G2/M DNA damage checkpoint	8	0	0	5	1	0	44.33
CHEK1	ENSG00000149554	checkpoint kinase 1	283	5	FALSE	TRUE	FALSE	TRUE	FALSE	FALSE	FALSE	FALSE	FALSE	FALSE	FALSE	FALSE	Nucleus	0	10	CHEMBL574737	UCN-01	FALSE	2	FALSE	Reactome	HDR through Homologous Recombination (HRR)	8	0	0	5	1	0	44.33
CHEK1	ENSG00000149554	checkpoint kinase 1	283	5	FALSE	TRUE	FALSE	TRUE	FALSE	FALSE	FALSE	FALSE	FALSE	FALSE	FALSE	FALSE	Nucleus	0	10	CHEMBL574737	UCN-01	FALSE	2	FALSE	Reactome	Cell Cycle Checkpoints	8	0	0	5	1	0	44.33
CHEK1	ENSG00000149554	checkpoint kinase 1	283	5	FALSE	TRUE	FALSE	TRUE	FALSE	FALSE	FALSE	FALSE	FALSE	FALSE	FALSE	FALSE	Nucleus	0	10	CHEMBL3545377	LY-2606368	FALSE	2	FALSE	Reactome	HDR through Homologous Recombination (HRR)	8	0	0	5	1	0	44.33
CHEK1	ENSG00000149554	checkpoint kinase 1	283	5	FALSE	TRUE	FALSE	TRUE	FALSE	FALSE	FALSE	FALSE	FALSE	FALSE	FALSE	FALSE	Nucleus	0	10	CHEMBL2386889	SCH-900776	FALSE	2	FALSE	Reactome	Regulation of TP53 Activity	8	0	0	5	1	0	44.33
CHEK1	ENSG00000149554	checkpoint kinase 1	283	5	FALSE	TRUE	FALSE	TRUE	FALSE	FALSE	FALSE	FALSE	FALSE	FALSE	FALSE	FALSE	Nucleus	0	10	CHEMBL3545377	LY-2606368	FALSE	2	FALSE	Reactome	Transcriptional Regulation by TP53	8	0	0	5	1	0	44.33
CHEK1	ENSG00000149554	checkpoint kinase 1	283	5	FALSE	TRUE	FALSE	TRUE	FALSE	FALSE	FALSE	FALSE	FALSE	FALSE	FALSE	FALSE	Nucleus	0	10	CHEMBL2386889	SCH-900776	FALSE	2	FALSE	Reactome	DNA Repair	8	0	0	5	1	0	44.33
CHEK1	ENSG00000149554	checkpoint kinase 1	283	5	FALSE	TRUE	FALSE	TRUE	FALSE	FALSE	FALSE	FALSE	FALSE	FALSE	FALSE	FALSE	Nucleus	0	10	CHEMBL574737	UCN-01	FALSE	2	FALSE	Reactome	Cell Cycle Checkpoints	8	0	0	5	1	0	44.33
CHEK1	ENSG00000149554	checkpoint kinase 1	283	5	FALSE	TRUE	FALSE	TRUE	FALSE	FALSE	FALSE	FALSE	FALSE	FALSE	FALSE	FALSE	Nucleus	0	10	CHEMBL574737	UCN-01	FALSE	2	FALSE	Reactome	Cell Cycle Checkpoints	8	0	0	5	1	0	44.33
CHEK1	ENSG00000149554	checkpoint kinase 1	283	5	FALSE	TRUE	FALSE	TRUE	FALSE	FALSE	FALSE	FALSE	FALSE	FALSE	FALSE	FALSE	Nucleus	0	10	CHEMBL574737	UCN-01	FALSE	2	FALSE	Reactome	DNA Repair	8	0	0	5	1	0	44.33
CHEK1	ENSG00000149554	checkpoint kinase 1	283	5	FALSE	TRUE	FALSE	TRUE	FALSE	FALSE	FALSE	FALSE	FALSE	FALSE	FALSE	FALSE	Nucleus	0	10	CHEMBL574737	UCN-01	FALSE	2	FALSE	Reactome	Cell Cycle Checkpoints	8	0	0	5	1	0	44.33
CHEK1	ENSG00000149554	checkpoint kinase 1	283	5	FALSE	TRUE	FALSE	TRUE	FALSE	FALSE	FALSE	FALSE	FALSE	FALSE	FALSE	FALSE	Nucleus	0	10	CHEMBL3544911	PREXASERTIB	FALSE	2	FALSE	Reactome	Cell Cycle Checkpoints	8	0	0	5	1	0	44.33
CHEK1	ENSG00000149554	checkpoint kinase 1	283	5	FALSE	TRUE	FALSE	TRUE	FALSE	FALSE	FALSE	FALSE	FALSE	FALSE	FALSE	FALSE	Nucleus	0	10	CHEMBL574737	UCN-01	FALSE	2	FALSE	Reactome	DNA Repair	8	0	0	5	1	0	44.33
CHEK1	ENSG00000149554	checkpoint kinase 1	283	5	FALSE	TRUE	FALSE	TRUE	FALSE	FALSE	FALSE	FALSE	FALSE	FALSE	FALSE	FALSE	Nucleus	0	10	CHEMBL574737	UCN-01	FALSE	2	FALSE	Reactome	HDR through Homologous Recombination (HRR)	8	0	0	5	1	0	44.33
CHEK1	ENSG00000149554	checkpoint kinase 1	283	5	FALSE	TRUE	FALSE	TRUE	FALSE	FALSE	FALSE	FALSE	FALSE	FALSE	FALSE	FALSE	Nucleus	0	10	CHEMBL574737	UCN-01	FALSE	2	FALSE	Reactome	G2/M Checkpoints	8	0	0	5	1	0	44.33
CHEK1	ENSG00000149554	checkpoint kinase 1	283	5	FALSE	TRUE	FALSE	TRUE	FALSE	FALSE	FALSE	FALSE	FALSE	FALSE	FALSE	FALSE	Nucleus	0	10	CHEMBL574737	UCN-01	FALSE	2	FALSE	Reactome	Transcriptional Regulation by TP53	8	0	0	5	1	0	44.33
CHEK1	ENSG00000149554	checkpoint kinase 1	283	5	FALSE	TRUE	FALSE	TRUE	FALSE	FALSE	FALSE	FALSE	FALSE	FALSE	FALSE	FALSE	Nucleus	0	10	CHEMBL574737	UCN-01	FALSE	2	FALSE	Reactome	G2/M Checkpoints	8	0	0	5	1	0	44.33
CHEK1	ENSG00000149554	checkpoint kinase 1	283	5	FALSE	TRUE	FALSE	TRUE	FALSE	FALSE	FALSE	FALSE	FALSE	FALSE	FALSE	FALSE	Nucleus	0	10	CHEMBL574737	UCN-01	FALSE	2	FALSE	Reactome	Activation of ATR in response to replication stress	8	0	0	5	1	0	44.33
CHEK1	ENSG00000149554	checkpoint kinase 1	283	5	FALSE	TRUE	FALSE	TRUE	FALSE	FALSE	FALSE	FALSE	FALSE	FALSE	FALSE	FALSE	Nucleus	0	10	CHEMBL574737	UCN-01	FALSE	2	FALSE	Reactome	Regulation of TP53 Activity	8	0	0	5	1	0	44.33
CHEK1	ENSG00000149554	checkpoint kinase 1	283	5	FALSE	TRUE	FALSE	TRUE	FALSE	FALSE	FALSE	FALSE	FALSE	FALSE	FALSE	FALSE	Nucleus	0	10	CHEMBL574737	UCN-01	FALSE	2	FALSE	Reactome	G2/M Checkpoints	8	0	0	5	1	0	44.33
CHEK1	ENSG00000149554	checkpoint kinase 1	283	5	FALSE	TRUE	FALSE	TRUE	FALSE	FALSE	FALSE	FALSE	FALSE	FALSE	FALSE	FALSE	Nucleus	0	10	CHEMBL3545377	LY-2606368	FALSE	2	FALSE	Reactome	G2/M Checkpoints	8	0	0	5	1	0	44.33
CHEK1	ENSG00000149554	checkpoint kinase 1	283	5	FALSE	TRUE	FALSE	TRUE	FALSE	FALSE	FALSE	FALSE	FALSE	FALSE	FALSE	FALSE	Nucleus	0	10	CHEMBL574737	UCN-01	FALSE	2	FALSE	Reactome	Activation of ATR in response to replication stress	8	0	0	5	1	0	44.33
CHEK1	ENSG00000149554	checkpoint kinase 1	283	5	FALSE	TRUE	FALSE	TRUE	FALSE	FALSE	FALSE	FALSE	FALSE	FALSE	FALSE	FALSE	Nucleus	0	10	CHEMBL574737	UCN-01	FALSE	2	FALSE	Reactome	G2/M DNA damage checkpoint	8	0	0	5	1	0	44.33
CHEK1	ENSG00000149554	checkpoint kinase 1	283	5	FALSE	TRUE	FALSE	TRUE	FALSE	FALSE	FALSE	FALSE	FALSE	FALSE	FALSE	FALSE	Nucleus	0	10	CHEMBL574737	UCN-01	FALSE	2	FALSE	Reactome	HDR through Homologous Recombination (HRR)	8	0	0	5	1	0	44.33
CHEK1	ENSG00000149554	checkpoint kinase 1	283	5	FALSE	TRUE	FALSE	TRUE	FALSE	FALSE	FALSE	FALSE	FALSE	FALSE	FALSE	FALSE	Nucleus	0	10	CHEMBL574737	UCN-01	FALSE	2	FALSE	Reactome	DNA Repair	8	0	0	5	1	0	44.33
CHEK1	ENSG00000149554	checkpoint kinase 1	283	5	FALSE	TRUE	FALSE	TRUE	FALSE	FALSE	FALSE	FALSE	FALSE	FALSE	FALSE	FALSE	Nucleus	0	10	CHEMBL574737	UCN-01	FALSE	2	FALSE	Reactome	HDR through Homologous Recombination (HRR)	8	0	0	5	1	0	44.33
CHEK1	ENSG00000149554	checkpoint kinase 1	283	5	FALSE	TRUE	FALSE	TRUE	FALSE	FALSE	FALSE	FALSE	FALSE	FALSE	FALSE	FALSE	Nucleus	0	10	CHEMBL3544911	PREXASERTIB	FALSE	2	FALSE	Reactome	Regulation of TP53 Activity	8	0	0	5	1	0	44.33
CHEK1	ENSG00000149554	checkpoint kinase 1	283	5	FALSE	TRUE	FALSE	TRUE	FALSE	FALSE	FALSE	FALSE	FALSE	FALSE	FALSE	FALSE	Nucleus	0	10	CHEMBL574737	UCN-01	FALSE	2	FALSE	Reactome	HDR through Homologous Recombination (HRR)	8	0	0	5	1	0	44.33
CHEK1	ENSG00000149554	checkpoint kinase 1	283	5	FALSE	TRUE	FALSE	TRUE	FALSE	FALSE	FALSE	FALSE	FALSE	FALSE	FALSE	FALSE	Nucleus	0	10	CHEMBL574737	UCN-01	FALSE	2	FALSE	Reactome	G2/M DNA damage checkpoint	8	0	0	5	1	0	44.33
CHEK1	ENSG00000149554	checkpoint kinase 1	283	5	FALSE	TRUE	FALSE	TRUE	FALSE	FALSE	FALSE	FALSE	FALSE	FALSE	FALSE	FALSE	Nucleus	0	10	CHEMBL3545377	LY-2606368	FALSE	2	FALSE	Reactome	G2/M Checkpoints	8	0	0	5	1	0	44.33
CHEK1	ENSG00000149554	checkpoint kinase 1	283	5	FALSE	TRUE	FALSE	TRUE	FALSE	FALSE	FALSE	FALSE	FALSE	FALSE	FALSE	FALSE	Nucleus	0	10	CHEMBL574737	UCN-01	FALSE	2	FALSE	Reactome	Transcriptional Regulation by TP53	8	0	0	5	1	0	44.33
CHEK1	ENSG00000149554	checkpoint kinase 1	283	5	FALSE	TRUE	FALSE	TRUE	FALSE	FALSE	FALSE	FALSE	FALSE	FALSE	FALSE	FALSE	Nucleus	0	10	CHEMBL574737	UCN-01	FALSE	2	FALSE	Reactome	G2/M Checkpoints	8	0	0	5	1	0	44.33
CHEK1	ENSG00000149554	checkpoint kinase 1	283	5	FALSE	TRUE	FALSE	TRUE	FALSE	FALSE	FALSE	FALSE	FALSE	FALSE	FALSE	FALSE	Nucleus	0	10	CHEMBL3545377	LY-2606368	FALSE	2	FALSE	Reactome	Activation of ATR in response to replication stress	8	0	0	5	1	0	44.33
CHEK1	ENSG00000149554	checkpoint kinase 1	283	5	FALSE	TRUE	FALSE	TRUE	FALSE	FALSE	FALSE	FALSE	FALSE	FALSE	FALSE	FALSE	Nucleus	0	10	CHEMBL3544911	PREXASERTIB	FALSE	2	FALSE	Reactome	G2/M Checkpoints	8	0	0	5	1	0	44.33
CHEK1	ENSG00000149554	checkpoint kinase 1	283	5	FALSE	TRUE	FALSE	TRUE	FALSE	FALSE	FALSE	FALSE	FALSE	FALSE	FALSE	FALSE	Nucleus	0	10	CHEMBL574737	UCN-01	FALSE	2	FALSE	Reactome	G2/M Checkpoints	8	0	0	5	1	0	44.33
CHEK1	ENSG00000149554	checkpoint kinase 1	283	5	FALSE	TRUE	FALSE	TRUE	FALSE	FALSE	FALSE	FALSE	FALSE	FALSE	FALSE	FALSE	Nucleus	0	10	CHEMBL574737	UCN-01	FALSE	2	FALSE	Reactome	Transcriptional Regulation by TP53	8	0	0	5	1	0	44.33
CHEK1	ENSG00000149554	checkpoint kinase 1	283	5	FALSE	TRUE	FALSE	TRUE	FALSE	FALSE	FALSE	FALSE	FALSE	FALSE	FALSE	FALSE	Nucleus	0	10	CHEMBL3545377	LY-2606368	FALSE	2	FALSE	Reactome	Cell Cycle Checkpoints	8	0	0	5	1	0	44.33
CHEK1	ENSG00000149554	checkpoint kinase 1	283	5	FALSE	TRUE	FALSE	TRUE	FALSE	FALSE	FALSE	FALSE	FALSE	FALSE	FALSE	FALSE	Nucleus	0	10	CHEMBL574737	UCN-01	FALSE	2	FALSE	Reactome	Cell Cycle Checkpoints	8	0	0	5	1	0	44.33
CHEK1	ENSG00000149554	checkpoint kinase 1	283	5	FALSE	TRUE	FALSE	TRUE	FALSE	FALSE	FALSE	FALSE	FALSE	FALSE	FALSE	FALSE	Nucleus	0	10	CHEMBL574737	UCN-01	FALSE	2	FALSE	Reactome	DNA Repair	8	0	0	5	1	0	44.33
CHEK1	ENSG00000149554	checkpoint kinase 1	283	5	FALSE	TRUE	FALSE	TRUE	FALSE	FALSE	FALSE	FALSE	FALSE	FALSE	FALSE	FALSE	Nucleus	0	10	CHEMBL574737	UCN-01	FALSE	2	FALSE	Reactome	G2/M DNA damage checkpoint	8	0	0	5	1	0	44.33
CHEK1	ENSG00000149554	checkpoint kinase 1	283	5	FALSE	TRUE	FALSE	TRUE	FALSE	FALSE	FALSE	FALSE	FALSE	FALSE	FALSE	FALSE	Nucleus	0	10	CHEMBL574737	UCN-01	FALSE	2	FALSE	Reactome	G2/M DNA damage checkpoint	8	0	0	5	1	0	44.33
CHEK1	ENSG00000149554	checkpoint kinase 1	283	5	FALSE	TRUE	FALSE	TRUE	FALSE	FALSE	FALSE	FALSE	FALSE	FALSE	FALSE	FALSE	Nucleus	0	10	CHEMBL3544911	PREXASERTIB	FALSE	2	FALSE	Reactome	Transcriptional Regulation by TP53	8	0	0	5	1	0	44.33
CHEK1	ENSG00000149554	checkpoint kinase 1	283	5	FALSE	TRUE	FALSE	TRUE	FALSE	FALSE	FALSE	FALSE	FALSE	FALSE	FALSE	FALSE	Nucleus	0	10	CHEMBL574737	UCN-01	FALSE	2	FALSE	Reactome	Cell Cycle Checkpoints	8	0	0	5	1	0	44.33
CHEK1	ENSG00000149554	checkpoint kinase 1	283	5	FALSE	TRUE	FALSE	TRUE	FALSE	FALSE	FALSE	FALSE	FALSE	FALSE	FALSE	FALSE	Nucleus	0	10	CHEMBL3544911	PREXASERTIB	FALSE	2	FALSE	Reactome	Transcriptional Regulation by TP53	8	0	0	5	1	0	44.33
CHEK1	ENSG00000149554	checkpoint kinase 1	283	5	FALSE	TRUE	FALSE	TRUE	FALSE	FALSE	FALSE	FALSE	FALSE	FALSE	FALSE	FALSE	Nucleus	0	10	CHEMBL3544911	PREXASERTIB	FALSE	2	FALSE	Reactome	G2/M Checkpoints	8	0	0	5	1	0	44.33
CHEK1	ENSG00000149554	checkpoint kinase 1	283	5	FALSE	TRUE	FALSE	TRUE	FALSE	FALSE	FALSE	FALSE	FALSE	FALSE	FALSE	FALSE	Nucleus	0	10	CHEMBL3545377	LY-2606368	FALSE	2	FALSE	Reactome	G2/M Checkpoints	8	0	0	5	1	0	44.33
CHEK1	ENSG00000149554	checkpoint kinase 1	283	5	FALSE	TRUE	FALSE	TRUE	FALSE	FALSE	FALSE	FALSE	FALSE	FALSE	FALSE	FALSE	Nucleus	0	10	CHEMBL3544936	XL-844	FALSE	1	FALSE	Reactome	Transcriptional Regulation by TP53	8	0	0	5	1	0	44.33
CHEK1	ENSG00000149554	checkpoint kinase 1	283	5	FALSE	TRUE	FALSE	TRUE	FALSE	FALSE	FALSE	FALSE	FALSE	FALSE	FALSE	FALSE	Nucleus	0	10	CHEMBL3545377	LY-2606368	FALSE	2	FALSE	Reactome	Regulation of TP53 Activity	8	0	0	5	1	0	44.33
CHEK1	ENSG00000149554	checkpoint kinase 1	283	5	FALSE	TRUE	FALSE	TRUE	FALSE	FALSE	FALSE	FALSE	FALSE	FALSE	FALSE	FALSE	Nucleus	0	10	CHEMBL3039517	RABUSERTIB	FALSE	2	FALSE	Reactome	Activation of ATR in response to replication stress	8	0	0	5	1	0	44.33
CHEK1	ENSG00000149554	checkpoint kinase 1	283	5	FALSE	TRUE	FALSE	TRUE	FALSE	FALSE	FALSE	FALSE	FALSE	FALSE	FALSE	FALSE	Nucleus	0	10	CHEMBL3545377	LY-2606368	FALSE	2	FALSE	Reactome	Transcriptional Regulation by TP53	8	0	0	5	1	0	44.33
CHEK1	ENSG00000149554	checkpoint kinase 1	283	5	FALSE	TRUE	FALSE	TRUE	FALSE	FALSE	FALSE	FALSE	FALSE	FALSE	FALSE	FALSE	Nucleus	0	10	CHEMBL574737	UCN-01	FALSE	2	FALSE	Reactome	Transcriptional Regulation by TP53	8	0	0	5	1	0	44.33
CHEK1	ENSG00000149554	checkpoint kinase 1	283	5	FALSE	TRUE	FALSE	TRUE	FALSE	FALSE	FALSE	FALSE	FALSE	FALSE	FALSE	FALSE	Nucleus	0	10	CHEMBL574737	UCN-01	FALSE	2	FALSE	Reactome	Transcriptional Regulation by TP53	8	0	0	5	1	0	44.33
CHEK1	ENSG00000149554	checkpoint kinase 1	283	5	FALSE	TRUE	FALSE	TRUE	FALSE	FALSE	FALSE	FALSE	FALSE	FALSE	FALSE	FALSE	Nucleus	0	10	CHEMBL574737	UCN-01	FALSE	2	FALSE	Reactome	G2/M Checkpoints	8	0	0	5	1	0	44.33
CHEK1	ENSG00000149554	checkpoint kinase 1	283	5	FALSE	TRUE	FALSE	TRUE	FALSE	FALSE	FALSE	FALSE	FALSE	FALSE	FALSE	FALSE	Nucleus	0	10	CHEMBL3545377	LY-2606368	FALSE	2	FALSE	Reactome	DNA Repair	8	0	0	5	1	0	44.33
CHEK1	ENSG00000149554	checkpoint kinase 1	283	5	FALSE	TRUE	FALSE	TRUE	FALSE	FALSE	FALSE	FALSE	FALSE	FALSE	FALSE	FALSE	Nucleus	0	10	CHEMBL3545377	LY-2606368	FALSE	2	FALSE	Reactome	Activation of ATR in response to replication stress	8	0	0	5	1	0	44.33
CHEK1	ENSG00000149554	checkpoint kinase 1	283	5	FALSE	TRUE	FALSE	TRUE	FALSE	FALSE	FALSE	FALSE	FALSE	FALSE	FALSE	FALSE	Nucleus	0	10	CHEMBL3544911	PREXASERTIB	FALSE	2	FALSE	Reactome	Cell Cycle Checkpoints	8	0	0	5	1	0	44.33
CHEK1	ENSG00000149554	checkpoint kinase 1	283	5	FALSE	TRUE	FALSE	TRUE	FALSE	FALSE	FALSE	FALSE	FALSE	FALSE	FALSE	FALSE	Nucleus	0	10	CHEMBL574737	UCN-01	FALSE	2	FALSE	Reactome	DNA Repair	8	0	0	5	1	0	44.33
CHEK1	ENSG00000149554	checkpoint kinase 1	283	5	FALSE	TRUE	FALSE	TRUE	FALSE	FALSE	FALSE	FALSE	FALSE	FALSE	FALSE	FALSE	Nucleus	0	10	CHEMBL3544911	PREXASERTIB	FALSE	2	FALSE	Reactome	HDR through Homologous Recombination (HRR)	8	0	0	5	1	0	44.33
CHEK1	ENSG00000149554	checkpoint kinase 1	283	5	FALSE	TRUE	FALSE	TRUE	FALSE	FALSE	FALSE	FALSE	FALSE	FALSE	FALSE	FALSE	Nucleus	0	10	CHEMBL574737	UCN-01	FALSE	2	FALSE	Reactome	G2/M Checkpoints	8	0	0	5	1	0	44.33
CHEK1	ENSG00000149554	checkpoint kinase 1	283	5	FALSE	TRUE	FALSE	TRUE	FALSE	FALSE	FALSE	FALSE	FALSE	FALSE	FALSE	FALSE	Nucleus	0	10	CHEMBL574737	UCN-01	FALSE	2	FALSE	Reactome	Cell Cycle Checkpoints	8	0	0	5	1	0	44.33
CHEK1	ENSG00000149554	checkpoint kinase 1	283	5	FALSE	TRUE	FALSE	TRUE	FALSE	FALSE	FALSE	FALSE	FALSE	FALSE	FALSE	FALSE	Nucleus	0	10	CHEMBL574737	UCN-01	FALSE	2	FALSE	Reactome	G2/M Checkpoints	8	0	0	5	1	0	44.33
CHEK1	ENSG00000149554	checkpoint kinase 1	283	5	FALSE	TRUE	FALSE	TRUE	FALSE	FALSE	FALSE	FALSE	FALSE	FALSE	FALSE	FALSE	Nucleus	0	10	CHEMBL574737	UCN-01	FALSE	2	FALSE	Reactome	Activation of ATR in response to replication stress	8	0	0	5	1	0	44.33
CHEK1	ENSG00000149554	checkpoint kinase 1	283	5	FALSE	TRUE	FALSE	TRUE	FALSE	FALSE	FALSE	FALSE	FALSE	FALSE	FALSE	FALSE	Nucleus	0	10	CHEMBL574737	UCN-01	FALSE	2	FALSE	Reactome	Activation of ATR in response to replication stress	8	0	0	5	1	0	44.33
CHEK1	ENSG00000149554	checkpoint kinase 1	283	5	FALSE	TRUE	FALSE	TRUE	FALSE	FALSE	FALSE	FALSE	FALSE	FALSE	FALSE	FALSE	Nucleus	0	10	CHEMBL3545377	LY-2606368	FALSE	2	FALSE	Reactome	Regulation of TP53 Activity	8	0	0	5	1	0	44.33
CHEK1	ENSG00000149554	checkpoint kinase 1	283	5	FALSE	TRUE	FALSE	TRUE	FALSE	FALSE	FALSE	FALSE	FALSE	FALSE	FALSE	FALSE	Nucleus	0	10	CHEMBL574737	UCN-01	FALSE	2	FALSE	Reactome	Transcriptional Regulation by TP53	8	0	0	5	1	0	44.33
CHEK1	ENSG00000149554	checkpoint kinase 1	283	5	FALSE	TRUE	FALSE	TRUE	FALSE	FALSE	FALSE	FALSE	FALSE	FALSE	FALSE	FALSE	Nucleus	0	10	CHEMBL574737	UCN-01	FALSE	2	FALSE	Reactome	Activation of ATR in response to replication stress	8	0	0	5	1	0	44.33
CHEK1	ENSG00000149554	checkpoint kinase 1	283	5	FALSE	TRUE	FALSE	TRUE	FALSE	FALSE	FALSE	FALSE	FALSE	FALSE	FALSE	FALSE	Nucleus	0	10	CHEMBL574737	UCN-01	FALSE	2	FALSE	Reactome	Regulation of TP53 Activity	8	0	0	5	1	0	44.33
CHEK1	ENSG00000149554	checkpoint kinase 1	283	5	FALSE	TRUE	FALSE	TRUE	FALSE	FALSE	FALSE	FALSE	FALSE	FALSE	FALSE	FALSE	Nucleus	0	10	CHEMBL574737	UCN-01	FALSE	2	FALSE	Reactome	Transcriptional Regulation by TP53	8	0	0	5	1	0	44.33
CHEK1	ENSG00000149554	checkpoint kinase 1	283	5	FALSE	TRUE	FALSE	TRUE	FALSE	FALSE	FALSE	FALSE	FALSE	FALSE	FALSE	FALSE	Nucleus	0	10	CHEMBL574737	UCN-01	FALSE	2	FALSE	Reactome	Cell Cycle Checkpoints	8	0	0	5	1	0	44.33
CHEK1	ENSG00000149554	checkpoint kinase 1	283	5	FALSE	TRUE	FALSE	TRUE	FALSE	FALSE	FALSE	FALSE	FALSE	FALSE	FALSE	FALSE	Nucleus	0	10	CHEMBL3544911	PREXASERTIB	FALSE	2	FALSE	Reactome	G2/M Checkpoints	8	0	0	5	1	0	44.33
CHEK1	ENSG00000149554	checkpoint kinase 1	283	5	FALSE	TRUE	FALSE	TRUE	FALSE	FALSE	FALSE	FALSE	FALSE	FALSE	FALSE	FALSE	Nucleus	0	10	CHEMBL574737	UCN-01	FALSE	2	FALSE	Reactome	Activation of ATR in response to replication stress	8	0	0	5	1	0	44.33
CHEK1	ENSG00000149554	checkpoint kinase 1	283	5	FALSE	TRUE	FALSE	TRUE	FALSE	FALSE	FALSE	FALSE	FALSE	FALSE	FALSE	FALSE	Nucleus	0	10	CHEMBL2386889	SCH-900776	FALSE	2	FALSE	Reactome	G2/M Checkpoints	8	0	0	5	1	0	44.33
CHEK1	ENSG00000149554	checkpoint kinase 1	283	5	FALSE	TRUE	FALSE	TRUE	FALSE	FALSE	FALSE	FALSE	FALSE	FALSE	FALSE	FALSE	Nucleus	0	10	CHEMBL574737	UCN-01	FALSE	2	FALSE	Reactome	G2/M Checkpoints	8	0	0	5	1	0	44.33
CHEK1	ENSG00000149554	checkpoint kinase 1	283	5	FALSE	TRUE	FALSE	TRUE	FALSE	FALSE	FALSE	FALSE	FALSE	FALSE	FALSE	FALSE	Nucleus	0	10	CHEMBL574737	UCN-01	FALSE	2	FALSE	Reactome	Cell Cycle Checkpoints	8	0	0	5	1	0	44.33
CHEK1	ENSG00000149554	checkpoint kinase 1	283	5	FALSE	TRUE	FALSE	TRUE	FALSE	FALSE	FALSE	FALSE	FALSE	FALSE	FALSE	FALSE	Nucleus	0	10	CHEMBL574737	UCN-01	FALSE	2	FALSE	Reactome	Regulation of TP53 Activity	8	0	0	5	1	0	44.33
CHEK1	ENSG00000149554	checkpoint kinase 1	283	5	FALSE	TRUE	FALSE	TRUE	FALSE	FALSE	FALSE	FALSE	FALSE	FALSE	FALSE	FALSE	Nucleus	0	10	CHEMBL3039517	RABUSERTIB	FALSE	2	FALSE	Reactome	DNA Repair	8	0	0	5	1	0	44.33
CHEK1	ENSG00000149554	checkpoint kinase 1	283	5	FALSE	TRUE	FALSE	TRUE	FALSE	FALSE	FALSE	FALSE	FALSE	FALSE	FALSE	FALSE	Nucleus	0	10	CHEMBL3544911	PREXASERTIB	FALSE	2	FALSE	Reactome	Activation of ATR in response to replication stress	8	0	0	5	1	0	44.33
CHEK1	ENSG00000149554	checkpoint kinase 1	283	5	FALSE	TRUE	FALSE	TRUE	FALSE	FALSE	FALSE	FALSE	FALSE	FALSE	FALSE	FALSE	Nucleus	0	10	CHEMBL3545377	LY-2606368	FALSE	2	FALSE	Reactome	DNA Repair	8	0	0	5	1	0	44.33
CHEK1	ENSG00000149554	checkpoint kinase 1	283	5	FALSE	TRUE	FALSE	TRUE	FALSE	FALSE	FALSE	FALSE	FALSE	FALSE	FALSE	FALSE	Nucleus	0	10	CHEMBL574737	UCN-01	FALSE	2	FALSE	Reactome	Activation of ATR in response to replication stress	8	0	0	5	1	0	44.33
CHEK1	ENSG00000149554	checkpoint kinase 1	283	5	FALSE	TRUE	FALSE	TRUE	FALSE	FALSE	FALSE	FALSE	FALSE	FALSE	FALSE	FALSE	Nucleus	0	10	CHEMBL3544911	PREXASERTIB	FALSE	2	FALSE	Reactome	Regulation of TP53 Activity	8	0	0	5	1	0	44.33
CHEK1	ENSG00000149554	checkpoint kinase 1	283	5	FALSE	TRUE	FALSE	TRUE	FALSE	FALSE	FALSE	FALSE	FALSE	FALSE	FALSE	FALSE	Nucleus	0	10	CHEMBL3545377	LY-2606368	FALSE	2	FALSE	Reactome	Regulation of TP53 Activity	8	0	0	5	1	0	44.33
CHEK1	ENSG00000149554	checkpoint kinase 1	283	5	FALSE	TRUE	FALSE	TRUE	FALSE	FALSE	FALSE	FALSE	FALSE	FALSE	FALSE	FALSE	Nucleus	0	10	CHEMBL3544911	PREXASERTIB	FALSE	2	FALSE	Reactome	Activation of ATR in response to replication stress	8	0	0	5	1	0	44.33
CHEK1	ENSG00000149554	checkpoint kinase 1	283	5	FALSE	TRUE	FALSE	TRUE	FALSE	FALSE	FALSE	FALSE	FALSE	FALSE	FALSE	FALSE	Nucleus	0	10	CHEMBL3545377	LY-2606368	FALSE	2	FALSE	Reactome	DNA Repair	8	0	0	5	1	0	44.33
CHEK1	ENSG00000149554	checkpoint kinase 1	283	5	FALSE	TRUE	FALSE	TRUE	FALSE	FALSE	FALSE	FALSE	FALSE	FALSE	FALSE	FALSE	Nucleus	0	10	CHEMBL574737	UCN-01	FALSE	2	FALSE	Reactome	HDR through Homologous Recombination (HRR)	8	0	0	5	1	0	44.33
CHEK1	ENSG00000149554	checkpoint kinase 1	283	5	FALSE	TRUE	FALSE	TRUE	FALSE	FALSE	FALSE	FALSE	FALSE	FALSE	FALSE	FALSE	Nucleus	0	10	CHEMBL3544936	XL-844	FALSE	1	FALSE	Reactome	G2/M Checkpoints	8	0	0	5	1	0	44.33
CHEK1	ENSG00000149554	checkpoint kinase 1	283	5	FALSE	TRUE	FALSE	TRUE	FALSE	FALSE	FALSE	FALSE	FALSE	FALSE	FALSE	FALSE	Nucleus	0	10	CHEMBL574737	UCN-01	FALSE	2	FALSE	Reactome	Activation of ATR in response to replication stress	8	0	0	5	1	0	44.33
CHEK1	ENSG00000149554	checkpoint kinase 1	283	5	FALSE	TRUE	FALSE	TRUE	FALSE	FALSE	FALSE	FALSE	FALSE	FALSE	FALSE	FALSE	Nucleus	0	10	CHEMBL574737	UCN-01	FALSE	2	FALSE	Reactome	Transcriptional Regulation by TP53	8	0	0	5	1	0	44.33
CHEK1	ENSG00000149554	checkpoint kinase 1	283	5	FALSE	TRUE	FALSE	TRUE	FALSE	FALSE	FALSE	FALSE	FALSE	FALSE	FALSE	FALSE	Nucleus	0	10	CHEMBL574737	UCN-01	FALSE	2	FALSE	Reactome	G2/M Checkpoints	8	0	0	5	1	0	44.33
CHEK1	ENSG00000149554	checkpoint kinase 1	283	5	FALSE	TRUE	FALSE	TRUE	FALSE	FALSE	FALSE	FALSE	FALSE	FALSE	FALSE	FALSE	Nucleus	0	10	CHEMBL574737	UCN-01	FALSE	2	FALSE	Reactome	Transcriptional Regulation by TP53	8	0	0	5	1	0	44.33
CHEK1	ENSG00000149554	checkpoint kinase 1	283	5	FALSE	TRUE	FALSE	TRUE	FALSE	FALSE	FALSE	FALSE	FALSE	FALSE	FALSE	FALSE	Nucleus	0	10	CHEMBL574737	UCN-01	FALSE	2	FALSE	Reactome	DNA Repair	8	0	0	5	1	0	44.33
CHEK1	ENSG00000149554	checkpoint kinase 1	283	5	FALSE	TRUE	FALSE	TRUE	FALSE	FALSE	FALSE	FALSE	FALSE	FALSE	FALSE	FALSE	Nucleus	0	10	CHEMBL3544911	PREXASERTIB	FALSE	2	FALSE	Reactome	Transcriptional Regulation by TP53	8	0	0	5	1	0	44.33
CHEK1	ENSG00000149554	checkpoint kinase 1	283	5	FALSE	TRUE	FALSE	TRUE	FALSE	FALSE	FALSE	FALSE	FALSE	FALSE	FALSE	FALSE	Nucleus	0	10	CHEMBL574737	UCN-01	FALSE	2	FALSE	Reactome	Regulation of TP53 Activity	8	0	0	5	1	0	44.33
CHEK1	ENSG00000149554	checkpoint kinase 1	283	5	FALSE	TRUE	FALSE	TRUE	FALSE	FALSE	FALSE	FALSE	FALSE	FALSE	FALSE	FALSE	Nucleus	0	10	CHEMBL3544911	PREXASERTIB	FALSE	2	FALSE	Reactome	DNA Repair	8	0	0	5	1	0	44.33
CHEK1	ENSG00000149554	checkpoint kinase 1	283	5	FALSE	TRUE	FALSE	TRUE	FALSE	FALSE	FALSE	FALSE	FALSE	FALSE	FALSE	FALSE	Nucleus	0	10	CHEMBL3544911	PREXASERTIB	FALSE	2	FALSE	Reactome	Activation of ATR in response to replication stress	8	0	0	5	1	0	44.33
CHEK1	ENSG00000149554	checkpoint kinase 1	283	5	FALSE	TRUE	FALSE	TRUE	FALSE	FALSE	FALSE	FALSE	FALSE	FALSE	FALSE	FALSE	Nucleus	0	10	CHEMBL2386889	SCH-900776	FALSE	2	FALSE	Reactome	Transcriptional Regulation by TP53	8	0	0	5	1	0	44.33
CHEK1	ENSG00000149554	checkpoint kinase 1	283	5	FALSE	TRUE	FALSE	TRUE	FALSE	FALSE	FALSE	FALSE	FALSE	FALSE	FALSE	FALSE	Nucleus	0	10	CHEMBL574737	UCN-01	FALSE	2	FALSE	Reactome	HDR through Homologous Recombination (HRR)	8	0	0	5	1	0	44.33
CHEK1	ENSG00000149554	checkpoint kinase 1	283	5	FALSE	TRUE	FALSE	TRUE	FALSE	FALSE	FALSE	FALSE	FALSE	FALSE	FALSE	FALSE	Nucleus	0	10	CHEMBL574737	UCN-01	FALSE	2	FALSE	Reactome	Activation of ATR in response to replication stress	8	0	0	5	1	0	44.33
CHEK1	ENSG00000149554	checkpoint kinase 1	283	5	FALSE	TRUE	FALSE	TRUE	FALSE	FALSE	FALSE	FALSE	FALSE	FALSE	FALSE	FALSE	Nucleus	0	10	CHEMBL574737	UCN-01	FALSE	2	FALSE	Reactome	HDR through Homologous Recombination (HRR)	8	0	0	5	1	0	44.33
CHEK1	ENSG00000149554	checkpoint kinase 1	283	5	FALSE	TRUE	FALSE	TRUE	FALSE	FALSE	FALSE	FALSE	FALSE	FALSE	FALSE	FALSE	Nucleus	0	10	CHEMBL574737	UCN-01	FALSE	2	FALSE	Reactome	G2/M Checkpoints	8	0	0	5	1	0	44.33
CHEK1	ENSG00000149554	checkpoint kinase 1	283	5	FALSE	TRUE	FALSE	TRUE	FALSE	FALSE	FALSE	FALSE	FALSE	FALSE	FALSE	FALSE	Nucleus	0	10	CHEMBL574737	UCN-01	FALSE	2	FALSE	Reactome	Transcriptional Regulation by TP53	8	0	0	5	1	0	44.33
CHEK1	ENSG00000149554	checkpoint kinase 1	283	5	FALSE	TRUE	FALSE	TRUE	FALSE	FALSE	FALSE	FALSE	FALSE	FALSE	FALSE	FALSE	Nucleus	0	10	CHEMBL574737	UCN-01	FALSE	2	FALSE	Reactome	Transcriptional Regulation by TP53	8	0	0	5	1	0	44.33
CHEK1	ENSG00000149554	checkpoint kinase 1	283	5	FALSE	TRUE	FALSE	TRUE	FALSE	FALSE	FALSE	FALSE	FALSE	FALSE	FALSE	FALSE	Nucleus	0	10	CHEMBL574737	UCN-01	FALSE	2	FALSE	Reactome	Regulation of TP53 Activity	8	0	0	5	1	0	44.33
CHEK1	ENSG00000149554	checkpoint kinase 1	283	5	FALSE	TRUE	FALSE	TRUE	FALSE	FALSE	FALSE	FALSE	FALSE	FALSE	FALSE	FALSE	Nucleus	0	10	CHEMBL3039517	RABUSERTIB	FALSE	2	FALSE	Reactome	Transcriptional Regulation by TP53	8	0	0	5	1	0	44.33
CHEK1	ENSG00000149554	checkpoint kinase 1	283	5	FALSE	TRUE	FALSE	TRUE	FALSE	FALSE	FALSE	FALSE	FALSE	FALSE	FALSE	FALSE	Nucleus	0	10	CHEMBL574737	UCN-01	FALSE	2	FALSE	Reactome	DNA Repair	8	0	0	5	1	0	44.33
CHEK1	ENSG00000149554	checkpoint kinase 1	283	5	FALSE	TRUE	FALSE	TRUE	FALSE	FALSE	FALSE	FALSE	FALSE	FALSE	FALSE	FALSE	Nucleus	0	10	CHEMBL574737	UCN-01	FALSE	2	FALSE	Reactome	DNA Repair	8	0	0	5	1	0	44.33
CHEK1	ENSG00000149554	checkpoint kinase 1	283	5	FALSE	TRUE	FALSE	TRUE	FALSE	FALSE	FALSE	FALSE	FALSE	FALSE	FALSE	FALSE	Nucleus	0	10	CHEMBL574737	UCN-01	FALSE	2	FALSE	Reactome	Regulation of TP53 Activity	8	0	0	5	1	0	44.33
CHEK1	ENSG00000149554	checkpoint kinase 1	283	5	FALSE	TRUE	FALSE	TRUE	FALSE	FALSE	FALSE	FALSE	FALSE	FALSE	FALSE	FALSE	Nucleus	0	10	CHEMBL574737	UCN-01	FALSE	2	FALSE	Reactome	G2/M DNA damage checkpoint	8	0	0	5	1	0	44.33
CHEK1	ENSG00000149554	checkpoint kinase 1	283	5	FALSE	TRUE	FALSE	TRUE	FALSE	FALSE	FALSE	FALSE	FALSE	FALSE	FALSE	FALSE	Nucleus	0	10	CHEMBL3039517	RABUSERTIB	FALSE	2	FALSE	Reactome	G2/M Checkpoints	8	0	0	5	1	0	44.33
CHEK1	ENSG00000149554	checkpoint kinase 1	283	5	FALSE	TRUE	FALSE	TRUE	FALSE	FALSE	FALSE	FALSE	FALSE	FALSE	FALSE	FALSE	Nucleus	0	10	CHEMBL3544936	XL-844	FALSE	1	FALSE	Reactome	G2/M DNA damage checkpoint	8	0	0	5	1	0	44.33
CHEK1	ENSG00000149554	checkpoint kinase 1	283	5	FALSE	TRUE	FALSE	TRUE	FALSE	FALSE	FALSE	FALSE	FALSE	FALSE	FALSE	FALSE	Nucleus	0	10	CHEMBL574737	UCN-01	FALSE	2	FALSE	Reactome	Cell Cycle Checkpoints	8	0	0	5	1	0	44.33
CHEK1	ENSG00000149554	checkpoint kinase 1	283	5	FALSE	TRUE	FALSE	TRUE	FALSE	FALSE	FALSE	FALSE	FALSE	FALSE	FALSE	FALSE	Nucleus	0	10	CHEMBL574737	UCN-01	FALSE	2	FALSE	Reactome	Activation of ATR in response to replication stress	8	0	0	5	1	0	44.33
CHEK1	ENSG00000149554	checkpoint kinase 1	283	5	FALSE	TRUE	FALSE	TRUE	FALSE	FALSE	FALSE	FALSE	FALSE	FALSE	FALSE	FALSE	Nucleus	0	10	CHEMBL574737	UCN-01	FALSE	2	FALSE	Reactome	Transcriptional Regulation by TP53	8	0	0	5	1	0	44.33
CHEK1	ENSG00000149554	checkpoint kinase 1	283	5	FALSE	TRUE	FALSE	TRUE	FALSE	FALSE	FALSE	FALSE	FALSE	FALSE	FALSE	FALSE	Nucleus	0	10	CHEMBL574737	UCN-01	FALSE	2	FALSE	Reactome	Regulation of TP53 Activity	8	0	0	5	1	0	44.33
CHEK1	ENSG00000149554	checkpoint kinase 1	283	5	FALSE	TRUE	FALSE	TRUE	FALSE	FALSE	FALSE	FALSE	FALSE	FALSE	FALSE	FALSE	Nucleus	0	10	CHEMBL574737	UCN-01	FALSE	2	FALSE	Reactome	G2/M Checkpoints	8	0	0	5	1	0	44.33
CHEK1	ENSG00000149554	checkpoint kinase 1	283	5	FALSE	TRUE	FALSE	TRUE	FALSE	FALSE	FALSE	FALSE	FALSE	FALSE	FALSE	FALSE	Nucleus	0	10	CHEMBL574737	UCN-01	FALSE	2	FALSE	Reactome	Transcriptional Regulation by TP53	8	0	0	5	1	0	44.33
CHEK1	ENSG00000149554	checkpoint kinase 1	283	5	FALSE	TRUE	FALSE	TRUE	FALSE	FALSE	FALSE	FALSE	FALSE	FALSE	FALSE	FALSE	Nucleus	0	10	CHEMBL574737	UCN-01	FALSE	2	FALSE	Reactome	DNA Repair	8	0	0	5	1	0	44.33
CHEK1	ENSG00000149554	checkpoint kinase 1	283	5	FALSE	TRUE	FALSE	TRUE	FALSE	FALSE	FALSE	FALSE	FALSE	FALSE	FALSE	FALSE	Nucleus	0	10	CHEMBL574737	UCN-01	FALSE	2	FALSE	Reactome	Regulation of TP53 Activity	8	0	0	5	1	0	44.33
CHEK1	ENSG00000149554	checkpoint kinase 1	283	5	FALSE	TRUE	FALSE	TRUE	FALSE	FALSE	FALSE	FALSE	FALSE	FALSE	FALSE	FALSE	Nucleus	0	10	CHEMBL3544911	PREXASERTIB	FALSE	2	FALSE	Reactome	Regulation of TP53 Activity	8	0	0	5	1	0	44.33
CHEK1	ENSG00000149554	checkpoint kinase 1	283	5	FALSE	TRUE	FALSE	TRUE	FALSE	FALSE	FALSE	FALSE	FALSE	FALSE	FALSE	FALSE	Nucleus	0	10	CHEMBL574737	UCN-01	FALSE	2	FALSE	Reactome	Activation of ATR in response to replication stress	8	0	0	5	1	0	44.33
CHEK1	ENSG00000149554	checkpoint kinase 1	283	5	FALSE	TRUE	FALSE	TRUE	FALSE	FALSE	FALSE	FALSE	FALSE	FALSE	FALSE	FALSE	Nucleus	0	10	CHEMBL3544936	XL-844	FALSE	1	FALSE	Reactome	Regulation of TP53 Activity	8	0	0	5	1	0	44.33
CHEK1	ENSG00000149554	checkpoint kinase 1	283	5	FALSE	TRUE	FALSE	TRUE	FALSE	FALSE	FALSE	FALSE	FALSE	FALSE	FALSE	FALSE	Nucleus	0	10	CHEMBL2386889	SCH-900776	FALSE	2	FALSE	Reactome	Activation of ATR in response to replication stress	8	0	0	5	1	0	44.33
CHEK1	ENSG00000149554	checkpoint kinase 1	283	5	FALSE	TRUE	FALSE	TRUE	FALSE	FALSE	FALSE	FALSE	FALSE	FALSE	FALSE	FALSE	Nucleus	0	10	CHEMBL574737	UCN-01	FALSE	2	FALSE	Reactome	G2/M DNA damage checkpoint	8	0	0	5	1	0	44.33
CHEK1	ENSG00000149554	checkpoint kinase 1	283	5	FALSE	TRUE	FALSE	TRUE	FALSE	FALSE	FALSE	FALSE	FALSE	FALSE	FALSE	FALSE	Nucleus	0	10	CHEMBL574737	UCN-01	FALSE	2	FALSE	Reactome	Regulation of TP53 Activity	8	0	0	5	1	0	44.33
CHEK1	ENSG00000149554	checkpoint kinase 1	283	5	FALSE	TRUE	FALSE	TRUE	FALSE	FALSE	FALSE	FALSE	FALSE	FALSE	FALSE	FALSE	Nucleus	0	10	CHEMBL3544911	PREXASERTIB	FALSE	2	FALSE	Reactome	DNA Repair	8	0	0	5	1	0	44.33
CHEK1	ENSG00000149554	checkpoint kinase 1	283	5	FALSE	TRUE	FALSE	TRUE	FALSE	FALSE	FALSE	FALSE	FALSE	FALSE	FALSE	FALSE	Nucleus	0	10	CHEMBL574737	UCN-01	FALSE	2	FALSE	Reactome	Regulation of TP53 Activity	8	0	0	5	1	0	44.33
CHEK1	ENSG00000149554	checkpoint kinase 1	283	5	FALSE	TRUE	FALSE	TRUE	FALSE	FALSE	FALSE	FALSE	FALSE	FALSE	FALSE	FALSE	Nucleus	0	10	CHEMBL2386889	SCH-900776	FALSE	2	FALSE	Reactome	HDR through Homologous Recombination (HRR)	8	0	0	5	1	0	44.33
CHEK1	ENSG00000149554	checkpoint kinase 1	283	5	FALSE	TRUE	FALSE	TRUE	FALSE	FALSE	FALSE	FALSE	FALSE	FALSE	FALSE	FALSE	Nucleus	0	10	CHEMBL574737	UCN-01	FALSE	2	FALSE	Reactome	Activation of ATR in response to replication stress	8	0	0	5	1	0	44.33
CHEK1	ENSG00000149554	checkpoint kinase 1	283	5	FALSE	TRUE	FALSE	TRUE	FALSE	FALSE	FALSE	FALSE	FALSE	FALSE	FALSE	FALSE	Nucleus	0	10	CHEMBL574737	UCN-01	FALSE	2	FALSE	Reactome	Transcriptional Regulation by TP53	8	0	0	5	1	0	44.33
CHEK1	ENSG00000149554	checkpoint kinase 1	283	5	FALSE	TRUE	FALSE	TRUE	FALSE	FALSE	FALSE	FALSE	FALSE	FALSE	FALSE	FALSE	Nucleus	0	10	CHEMBL574737	UCN-01	FALSE	2	FALSE	Reactome	Regulation of TP53 Activity	8	0	0	5	1	0	44.33
CHEK1	ENSG00000149554	checkpoint kinase 1	283	5	FALSE	TRUE	FALSE	TRUE	FALSE	FALSE	FALSE	FALSE	FALSE	FALSE	FALSE	FALSE	Nucleus	0	10	CHEMBL574737	UCN-01	FALSE	2	FALSE	Reactome	Transcriptional Regulation by TP53	8	0	0	5	1	0	44.33
CHEK1	ENSG00000149554	checkpoint kinase 1	283	5	FALSE	TRUE	FALSE	TRUE	FALSE	FALSE	FALSE	FALSE	FALSE	FALSE	FALSE	FALSE	Nucleus	0	10	CHEMBL3544936	XL-844	FALSE	1	FALSE	Reactome	Activation of ATR in response to replication stress	8	0	0	5	1	0	44.33
CHEK1	ENSG00000149554	checkpoint kinase 1	283	5	FALSE	TRUE	FALSE	TRUE	FALSE	FALSE	FALSE	FALSE	FALSE	FALSE	FALSE	FALSE	Nucleus	0	10	CHEMBL3544911	PREXASERTIB	FALSE	2	FALSE	Reactome	DNA Repair	8	0	0	5	1	0	44.33
CHEK1	ENSG00000149554	checkpoint kinase 1	283	5	FALSE	TRUE	FALSE	TRUE	FALSE	FALSE	FALSE	FALSE	FALSE	FALSE	FALSE	FALSE	Nucleus	0	10	CHEMBL574737	UCN-01	FALSE	2	FALSE	Reactome	Cell Cycle Checkpoints	8	0	0	5	1	0	44.33
CHEK1	ENSG00000149554	checkpoint kinase 1	283	5	FALSE	TRUE	FALSE	TRUE	FALSE	FALSE	FALSE	FALSE	FALSE	FALSE	FALSE	FALSE	Nucleus	0	10	CHEMBL574737	UCN-01	FALSE	2	FALSE	Reactome	Regulation of TP53 Activity	8	0	0	5	1	0	44.33
CHEK1	ENSG00000149554	checkpoint kinase 1	283	5	FALSE	TRUE	FALSE	TRUE	FALSE	FALSE	FALSE	FALSE	FALSE	FALSE	FALSE	FALSE	Nucleus	0	10	CHEMBL574737	UCN-01	FALSE	2	FALSE	Reactome	Cell Cycle Checkpoints	8	0	0	5	1	0	44.33
CHEK1	ENSG00000149554	checkpoint kinase 1	283	5	FALSE	TRUE	FALSE	TRUE	FALSE	FALSE	FALSE	FALSE	FALSE	FALSE	FALSE	FALSE	Nucleus	0	10	CHEMBL574737	UCN-01	FALSE	2	FALSE	Reactome	Activation of ATR in response to replication stress	8	0	0	5	1	0	44.33
CHEK1	ENSG00000149554	checkpoint kinase 1	283	5	FALSE	TRUE	FALSE	TRUE	FALSE	FALSE	FALSE	FALSE	FALSE	FALSE	FALSE	FALSE	Nucleus	0	10	CHEMBL574737	UCN-01	FALSE	2	FALSE	Reactome	Transcriptional Regulation by TP53	8	0	0	5	1	0	44.33
CHEK1	ENSG00000149554	checkpoint kinase 1	283	5	FALSE	TRUE	FALSE	TRUE	FALSE	FALSE	FALSE	FALSE	FALSE	FALSE	FALSE	FALSE	Nucleus	0	10	CHEMBL3545377	LY-2606368	FALSE	2	FALSE	Reactome	Cell Cycle Checkpoints	8	0	0	5	1	0	44.33
CHEK1	ENSG00000149554	checkpoint kinase 1	283	5	FALSE	TRUE	FALSE	TRUE	FALSE	FALSE	FALSE	FALSE	FALSE	FALSE	FALSE	FALSE	Nucleus	0	10	CHEMBL574737	UCN-01	FALSE	2	FALSE	Reactome	Activation of ATR in response to replication stress	8	0	0	5	1	0	44.33
CHEK1	ENSG00000149554	checkpoint kinase 1	283	5	FALSE	TRUE	FALSE	TRUE	FALSE	FALSE	FALSE	FALSE	FALSE	FALSE	FALSE	FALSE	Nucleus	0	10	CHEMBL3039517	RABUSERTIB	FALSE	2	FALSE	Reactome	Regulation of TP53 Activity	8	0	0	5	1	0	44.33
CHEK1	ENSG00000149554	checkpoint kinase 1	283	5	FALSE	TRUE	FALSE	TRUE	FALSE	FALSE	FALSE	FALSE	FALSE	FALSE	FALSE	FALSE	Nucleus	0	10	CHEMBL574737	UCN-01	FALSE	2	FALSE	Reactome	G2/M Checkpoints	8	0	0	5	1	0	44.33
CHEK1	ENSG00000149554	checkpoint kinase 1	283	5	FALSE	TRUE	FALSE	TRUE	FALSE	FALSE	FALSE	FALSE	FALSE	FALSE	FALSE	FALSE	Nucleus	0	10	CHEMBL574737	UCN-01	FALSE	2	FALSE	Reactome	G2/M Checkpoints	8	0	0	5	1	0	44.33
CHEK1	ENSG00000149554	checkpoint kinase 1	283	5	FALSE	TRUE	FALSE	TRUE	FALSE	FALSE	FALSE	FALSE	FALSE	FALSE	FALSE	FALSE	Nucleus	0	10	CHEMBL574737	UCN-01	FALSE	2	FALSE	Reactome	Activation of ATR in response to replication stress	8	0	0	5	1	0	44.33
CHEK1	ENSG00000149554	checkpoint kinase 1	283	5	FALSE	TRUE	FALSE	TRUE	FALSE	FALSE	FALSE	FALSE	FALSE	FALSE	FALSE	FALSE	Nucleus	0	10	CHEMBL574737	UCN-01	FALSE	2	FALSE	Reactome	Activation of ATR in response to replication stress	8	0	0	5	1	0	44.33
CHEK1	ENSG00000149554	checkpoint kinase 1	283	5	FALSE	TRUE	FALSE	TRUE	FALSE	FALSE	FALSE	FALSE	FALSE	FALSE	FALSE	FALSE	Nucleus	0	10	CHEMBL574737	UCN-01	FALSE	2	FALSE	Reactome	Regulation of TP53 Activity	8	0	0	5	1	0	44.33
CHEK1	ENSG00000149554	checkpoint kinase 1	283	5	FALSE	TRUE	FALSE	TRUE	FALSE	FALSE	FALSE	FALSE	FALSE	FALSE	FALSE	FALSE	Nucleus	0	10	CHEMBL574737	UCN-01	FALSE	2	FALSE	Reactome	Regulation of TP53 Activity	8	0	0	5	1	0	44.33
CHEK1	ENSG00000149554	checkpoint kinase 1	283	5	FALSE	TRUE	FALSE	TRUE	FALSE	FALSE	FALSE	FALSE	FALSE	FALSE	FALSE	FALSE	Nucleus	0	10	CHEMBL574737	UCN-01	FALSE	2	FALSE	Reactome	Regulation of TP53 Activity	8	0	0	5	1	0	44.33
CHEK1	ENSG00000149554	checkpoint kinase 1	283	5	FALSE	TRUE	FALSE	TRUE	FALSE	FALSE	FALSE	FALSE	FALSE	FALSE	FALSE	FALSE	Nucleus	0	10	CHEMBL574737	UCN-01	FALSE	2	FALSE	Reactome	G2/M Checkpoints	8	0	0	5	1	0	44.33
CHEK1	ENSG00000149554	checkpoint kinase 1	283	5	FALSE	TRUE	FALSE	TRUE	FALSE	FALSE	FALSE	FALSE	FALSE	FALSE	FALSE	FALSE	Nucleus	0	10	CHEMBL574737	UCN-01	FALSE	2	FALSE	Reactome	G2/M Checkpoints	8	0	0	5	1	0	44.33
CHEK1	ENSG00000149554	checkpoint kinase 1	283	5	FALSE	TRUE	FALSE	TRUE	FALSE	FALSE	FALSE	FALSE	FALSE	FALSE	FALSE	FALSE	Nucleus	0	10	CHEMBL3545377	LY-2606368	FALSE	2	FALSE	Reactome	Transcriptional Regulation by TP53	8	0	0	5	1	0	44.33
CHEK1	ENSG00000149554	checkpoint kinase 1	283	5	FALSE	TRUE	FALSE	TRUE	FALSE	FALSE	FALSE	FALSE	FALSE	FALSE	FALSE	FALSE	Nucleus	0	10	CHEMBL574737	UCN-01	FALSE	2	FALSE	Reactome	Regulation of TP53 Activity	8	0	0	5	1	0	44.33
CDK5	ENSG00000164885	cyclin dependent kinase 5	230	6	FALSE	TRUE	FALSE	TRUE	FALSE	FALSE	FALSE	FALSE	FALSE	FALSE	FALSE	FALSE	[Isoform 1]: Cytoplasm	0	7	CHEMBL2103840	DINACICLIB	FALSE	3	FALSE	Reactome	Transcriptional Regulation by TP53	2	0	1	3	2	0	42.3
CDK5	ENSG00000164885	cyclin dependent kinase 5	230	6	FALSE	TRUE	FALSE	TRUE	FALSE	FALSE	FALSE	FALSE	FALSE	FALSE	FALSE	FALSE	[Isoform 1]: Cytoplasm	0	7	CHEMBL4442620	RONICICLIB	FALSE	2	FALSE	Reactome	Regulation of TP53 Activity	2	0	1	3	2	0	42.3
CDK5	ENSG00000164885	cyclin dependent kinase 5	230	6	FALSE	TRUE	FALSE	TRUE	FALSE	FALSE	FALSE	FALSE	FALSE	FALSE	FALSE	FALSE	[Isoform 1]: Cytoplasm	0	7	CHEMBL4442620	RONICICLIB	FALSE	2	FALSE	Reactome	Regulation of TP53 Activity	2	0	1	3	2	0	42.3
CDK5	ENSG00000164885	cyclin dependent kinase 5	230	6	FALSE	TRUE	FALSE	TRUE	FALSE	FALSE	FALSE	FALSE	FALSE	FALSE	FALSE	FALSE	[Isoform 1]: Cytoplasm	0	7	CHEMBL14762	SELICICLIB	FALSE	2	FALSE	Reactome	Transcriptional Regulation by TP53	2	0	1	3	2	0	42.3
CDK5	ENSG00000164885	cyclin dependent kinase 5	230	6	FALSE	TRUE	FALSE	TRUE	FALSE	FALSE	FALSE	FALSE	FALSE	FALSE	FALSE	FALSE	[Isoform 1]: Cytoplasm	0	7	CHEMBL14762	SELICICLIB	FALSE	2	FALSE	Reactome	Regulation of TP53 Activity	2	0	1	3	2	0	42.3
CDK5	ENSG00000164885	cyclin dependent kinase 5	230	6	FALSE	TRUE	FALSE	TRUE	FALSE	FALSE	FALSE	FALSE	FALSE	FALSE	FALSE	FALSE	[Isoform 1]: Cytoplasm	0	7	CHEMBL4442620	RONICICLIB	FALSE	2	FALSE	Reactome	Regulation of TP53 Activity	2	0	1	3	2	0	42.3
CDK5	ENSG00000164885	cyclin dependent kinase 5	230	6	FALSE	TRUE	FALSE	TRUE	FALSE	FALSE	FALSE	FALSE	FALSE	FALSE	FALSE	FALSE	[Isoform 1]: Cytoplasm	0	7	CHEMBL14762	SELICICLIB	FALSE	2	FALSE	Reactome	Regulation of TP53 Activity	2	0	1	3	2	0	42.3
CDK5	ENSG00000164885	cyclin dependent kinase 5	230	6	FALSE	TRUE	FALSE	TRUE	FALSE	FALSE	FALSE	FALSE	FALSE	FALSE	FALSE	FALSE	[Isoform 1]: Cytoplasm	0	7	CHEMBL2103840	DINACICLIB	FALSE	3	FALSE	Reactome	Regulation of TP53 Activity	2	0	1	3	2	0	42.3
CDK5	ENSG00000164885	cyclin dependent kinase 5	230	6	FALSE	TRUE	FALSE	TRUE	FALSE	FALSE	FALSE	FALSE	FALSE	FALSE	FALSE	FALSE	[Isoform 1]: Cytoplasm	0	7	CHEMBL2103840	DINACICLIB	FALSE	3	FALSE	Reactome	Regulation of TP53 Activity	2	0	1	3	2	0	42.3
CDK5	ENSG00000164885	cyclin dependent kinase 5	230	6	FALSE	TRUE	FALSE	TRUE	FALSE	FALSE	FALSE	FALSE	FALSE	FALSE	FALSE	FALSE	[Isoform 1]: Cytoplasm	0	7	CHEMBL4442620	RONICICLIB	FALSE	2	FALSE	Reactome	Transcriptional Regulation by TP53	2	0	1	3	2	0	42.3
CDK5	ENSG00000164885	cyclin dependent kinase 5	230	6	FALSE	TRUE	FALSE	TRUE	FALSE	FALSE	FALSE	FALSE	FALSE	FALSE	FALSE	FALSE	[Isoform 1]: Cytoplasm	0	7	CHEMBL2103840	DINACICLIB	FALSE	3	FALSE	Reactome	Regulation of TP53 Activity	2	0	1	3	2	0	42.3
CDK5	ENSG00000164885	cyclin dependent kinase 5	230	6	FALSE	TRUE	FALSE	TRUE	FALSE	FALSE	FALSE	FALSE	FALSE	FALSE	FALSE	FALSE	[Isoform 1]: Cytoplasm	0	7	CHEMBL2103840	DINACICLIB	FALSE	3	FALSE	Reactome	Transcriptional Regulation by TP53	2	0	1	3	2	0	42.3
CDK5	ENSG00000164885	cyclin dependent kinase 5	230	6	FALSE	TRUE	FALSE	TRUE	FALSE	FALSE	FALSE	FALSE	FALSE	FALSE	FALSE	FALSE	[Isoform 1]: Cytoplasm	0	7	CHEMBL14762	SELICICLIB	FALSE	2	FALSE	Reactome	Transcriptional Regulation by TP53	2	0	1	3	2	0	42.3
CDK5	ENSG00000164885	cyclin dependent kinase 5	230	6	FALSE	TRUE	FALSE	TRUE	FALSE	FALSE	FALSE	FALSE	FALSE	FALSE	FALSE	FALSE	[Isoform 1]: Cytoplasm	0	7	CHEMBL2103840	DINACICLIB	FALSE	3	FALSE	Reactome	Regulation of TP53 Activity	2	0	1	3	2	0	42.3
CDK5	ENSG00000164885	cyclin dependent kinase 5	230	6	FALSE	TRUE	FALSE	TRUE	FALSE	FALSE	FALSE	FALSE	FALSE	FALSE	FALSE	FALSE	[Isoform 1]: Cytoplasm	0	7	CHEMBL4442620	RONICICLIB	FALSE	2	FALSE	Reactome	Regulation of TP53 Activity	2	0	1	3	2	0	42.3
CDK5	ENSG00000164885	cyclin dependent kinase 5	230	6	FALSE	TRUE	FALSE	TRUE	FALSE	FALSE	FALSE	FALSE	FALSE	FALSE	FALSE	FALSE	[Isoform 1]: Cytoplasm	0	7	CHEMBL2103840	DINACICLIB	FALSE	3	FALSE	Reactome	Transcriptional Regulation by TP53	2	0	1	3	2	0	42.3
CDK5	ENSG00000164885	cyclin dependent kinase 5	230	6	FALSE	TRUE	FALSE	TRUE	FALSE	FALSE	FALSE	FALSE	FALSE	FALSE	FALSE	FALSE	[Isoform 1]: Cytoplasm	0	7	CHEMBL14762	SELICICLIB	FALSE	2	FALSE	Reactome	Transcriptional Regulation by TP53	2	0	1	3	2	0	42.3
CDK5	ENSG00000164885	cyclin dependent kinase 5	230	6	FALSE	TRUE	FALSE	TRUE	FALSE	FALSE	FALSE	FALSE	FALSE	FALSE	FALSE	FALSE	[Isoform 1]: Cytoplasm	0	7	CHEMBL488436	AZD-5438	FALSE	1	FALSE	Reactome	Regulation of TP53 Activity	2	0	1	3	2	0	42.3
CDK5	ENSG00000164885	cyclin dependent kinase 5	230	6	FALSE	TRUE	FALSE	TRUE	FALSE	FALSE	FALSE	FALSE	FALSE	FALSE	FALSE	FALSE	[Isoform 1]: Cytoplasm	0	7	CHEMBL2103840	DINACICLIB	FALSE	3	FALSE	Reactome	Regulation of TP53 Activity	2	0	1	3	2	0	42.3
CDK5	ENSG00000164885	cyclin dependent kinase 5	230	6	FALSE	TRUE	FALSE	TRUE	FALSE	FALSE	FALSE	FALSE	FALSE	FALSE	FALSE	FALSE	[Isoform 1]: Cytoplasm	0	7	CHEMBL2103840	DINACICLIB	FALSE	3	FALSE	Reactome	Transcriptional Regulation by TP53	2	0	1	3	2	0	42.3
CDK5	ENSG00000164885	cyclin dependent kinase 5	230	6	FALSE	TRUE	FALSE	TRUE	FALSE	FALSE	FALSE	FALSE	FALSE	FALSE	FALSE	FALSE	[Isoform 1]: Cytoplasm	0	7	CHEMBL445813	AT-7519	FALSE	2	FALSE	Reactome	Regulation of TP53 Activity	2	0	1	3	2	0	42.3
CDK5	ENSG00000164885	cyclin dependent kinase 5	230	6	FALSE	TRUE	FALSE	TRUE	FALSE	FALSE	FALSE	FALSE	FALSE	FALSE	FALSE	FALSE	[Isoform 1]: Cytoplasm	0	7	CHEMBL488436	AZD-5438	FALSE	1	FALSE	Reactome	Transcriptional Regulation by TP53	2	0	1	3	2	0	42.3
CDK5	ENSG00000164885	cyclin dependent kinase 5	230	6	FALSE	TRUE	FALSE	TRUE	FALSE	FALSE	FALSE	FALSE	FALSE	FALSE	FALSE	FALSE	[Isoform 1]: Cytoplasm	0	7	CHEMBL4442620	RONICICLIB	FALSE	2	FALSE	Reactome	Transcriptional Regulation by TP53	2	0	1	3	2	0	42.3
CDK5	ENSG00000164885	cyclin dependent kinase 5	230	6	FALSE	TRUE	FALSE	TRUE	FALSE	FALSE	FALSE	FALSE	FALSE	FALSE	FALSE	FALSE	[Isoform 1]: Cytoplasm	0	7	CHEMBL2103840	DINACICLIB	FALSE	3	FALSE	Reactome	Regulation of TP53 Activity	2	0	1	3	2	0	42.3
CDK5	ENSG00000164885	cyclin dependent kinase 5	230	6	FALSE	TRUE	FALSE	TRUE	FALSE	FALSE	FALSE	FALSE	FALSE	FALSE	FALSE	FALSE	[Isoform 1]: Cytoplasm	0	7	CHEMBL2103840	DINACICLIB	FALSE	3	FALSE	Reactome	Regulation of TP53 Activity	2	0	1	3	2	0	42.3
CDK5	ENSG00000164885	cyclin dependent kinase 5	230	6	FALSE	TRUE	FALSE	TRUE	FALSE	FALSE	FALSE	FALSE	FALSE	FALSE	FALSE	FALSE	[Isoform 1]: Cytoplasm	0	7	CHEMBL2103840	DINACICLIB	FALSE	3	FALSE	Reactome	Transcriptional Regulation by TP53	2	0	1	3	2	0	42.3
CDK5	ENSG00000164885	cyclin dependent kinase 5	230	6	FALSE	TRUE	FALSE	TRUE	FALSE	FALSE	FALSE	FALSE	FALSE	FALSE	FALSE	FALSE	[Isoform 1]: Cytoplasm	0	7	CHEMBL4442620	RONICICLIB	FALSE	2	FALSE	Reactome	Regulation of TP53 Activity	2	0	1	3	2	0	42.3
CDK5	ENSG00000164885	cyclin dependent kinase 5	230	6	FALSE	TRUE	FALSE	TRUE	FALSE	FALSE	FALSE	FALSE	FALSE	FALSE	FALSE	FALSE	[Isoform 1]: Cytoplasm	0	7	CHEMBL2103840	DINACICLIB	FALSE	3	FALSE	Reactome	Transcriptional Regulation by TP53	2	0	1	3	2	0	42.3
CDK5	ENSG00000164885	cyclin dependent kinase 5	230	6	FALSE	TRUE	FALSE	TRUE	FALSE	FALSE	FALSE	FALSE	FALSE	FALSE	FALSE	FALSE	[Isoform 1]: Cytoplasm	0	7	CHEMBL4442620	RONICICLIB	FALSE	2	FALSE	Reactome	Transcriptional Regulation by TP53	2	0	1	3	2	0	42.3
CDK5	ENSG00000164885	cyclin dependent kinase 5	230	6	FALSE	TRUE	FALSE	TRUE	FALSE	FALSE	FALSE	FALSE	FALSE	FALSE	FALSE	FALSE	[Isoform 1]: Cytoplasm	0	7	CHEMBL14762	SELICICLIB	FALSE	2	FALSE	Reactome	Transcriptional Regulation by TP53	2	0	1	3	2	0	42.3
CDK5	ENSG00000164885	cyclin dependent kinase 5	230	6	FALSE	TRUE	FALSE	TRUE	FALSE	FALSE	FALSE	FALSE	FALSE	FALSE	FALSE	FALSE	[Isoform 1]: Cytoplasm	0	7	CHEMBL445813	AT-7519	FALSE	2	FALSE	Reactome	Transcriptional Regulation by TP53	2	0	1	3	2	0	42.3
CDK5	ENSG00000164885	cyclin dependent kinase 5	230	6	FALSE	TRUE	FALSE	TRUE	FALSE	FALSE	FALSE	FALSE	FALSE	FALSE	FALSE	FALSE	[Isoform 1]: Cytoplasm	0	7	CHEMBL4442620	RONICICLIB	FALSE	2	FALSE	Reactome	Transcriptional Regulation by TP53	2	0	1	3	2	0	42.3
CDK5	ENSG00000164885	cyclin dependent kinase 5	230	6	FALSE	TRUE	FALSE	TRUE	FALSE	FALSE	FALSE	FALSE	FALSE	FALSE	FALSE	FALSE	[Isoform 1]: Cytoplasm	0	7	CHEMBL14762	SELICICLIB	FALSE	2	FALSE	Reactome	Regulation of TP53 Activity	2	0	1	3	2	0	42.3
CDK5	ENSG00000164885	cyclin dependent kinase 5	230	6	FALSE	TRUE	FALSE	TRUE	FALSE	FALSE	FALSE	FALSE	FALSE	FALSE	FALSE	FALSE	[Isoform 1]: Cytoplasm	0	7	CHEMBL2103840	DINACICLIB	FALSE	3	FALSE	Reactome	Transcriptional Regulation by TP53	2	0	1	3	2	0	42.3
CDK5	ENSG00000164885	cyclin dependent kinase 5	230	6	FALSE	TRUE	FALSE	TRUE	FALSE	FALSE	FALSE	FALSE	FALSE	FALSE	FALSE	FALSE	[Isoform 1]: Cytoplasm	0	7	CHEMBL2103840	DINACICLIB	FALSE	3	FALSE	Reactome	Regulation of TP53 Activity	2	0	1	3	2	0	42.3
CDK5	ENSG00000164885	cyclin dependent kinase 5	230	6	FALSE	TRUE	FALSE	TRUE	FALSE	FALSE	FALSE	FALSE	FALSE	FALSE	FALSE	FALSE	[Isoform 1]: Cytoplasm	0	7	CHEMBL2103840	DINACICLIB	FALSE	3	FALSE	Reactome	Transcriptional Regulation by TP53	2	0	1	3	2	0	42.3
CDK5	ENSG00000164885	cyclin dependent kinase 5	230	6	FALSE	TRUE	FALSE	TRUE	FALSE	FALSE	FALSE	FALSE	FALSE	FALSE	FALSE	FALSE	[Isoform 1]: Cytoplasm	0	7	CHEMBL2103840	DINACICLIB	FALSE	3	FALSE	Reactome	Transcriptional Regulation by TP53	2	0	1	3	2	0	42.3
CDK5	ENSG00000164885	cyclin dependent kinase 5	230	6	FALSE	TRUE	FALSE	TRUE	FALSE	FALSE	FALSE	FALSE	FALSE	FALSE	FALSE	FALSE	[Isoform 1]: Cytoplasm	0	7	CHEMBL4442620	RONICICLIB	FALSE	2	FALSE	Reactome	Transcriptional Regulation by TP53	2	0	1	3	2	0	42.3
CDK5	ENSG00000164885	cyclin dependent kinase 5	230	6	FALSE	TRUE	FALSE	TRUE	FALSE	FALSE	FALSE	FALSE	FALSE	FALSE	FALSE	FALSE	[Isoform 1]: Cytoplasm	0	7	CHEMBL2103840	DINACICLIB	FALSE	3	FALSE	Reactome	Transcriptional Regulation by TP53	2	0	1	3	2	0	42.3
CDK5	ENSG00000164885	cyclin dependent kinase 5	230	6	FALSE	TRUE	FALSE	TRUE	FALSE	FALSE	FALSE	FALSE	FALSE	FALSE	FALSE	FALSE	[Isoform 1]: Cytoplasm	0	7	CHEMBL14762	SELICICLIB	FALSE	2	FALSE	Reactome	Regulation of TP53 Activity	2	0	1	3	2	0	42.3
CDK5	ENSG00000164885	cyclin dependent kinase 5	230	6	FALSE	TRUE	FALSE	TRUE	FALSE	FALSE	FALSE	FALSE	FALSE	FALSE	FALSE	FALSE	[Isoform 1]: Cytoplasm	0	7	CHEMBL445813	AT-7519	FALSE	2	FALSE	Reactome	Regulation of TP53 Activity	2	0	1	3	2	0	42.3
CDK5	ENSG00000164885	cyclin dependent kinase 5	230	6	FALSE	TRUE	FALSE	TRUE	FALSE	FALSE	FALSE	FALSE	FALSE	FALSE	FALSE	FALSE	[Isoform 1]: Cytoplasm	0	7	CHEMBL445813	AT-7519	FALSE	2	FALSE	Reactome	Transcriptional Regulation by TP53	2	0	1	3	2	0	42.3
CDK5	ENSG00000164885	cyclin dependent kinase 5	230	6	FALSE	TRUE	FALSE	TRUE	FALSE	FALSE	FALSE	FALSE	FALSE	FALSE	FALSE	FALSE	[Isoform 1]: Cytoplasm	0	7	CHEMBL14762	SELICICLIB	FALSE	2	FALSE	Reactome	Regulation of TP53 Activity	2	0	1	3	2	0	42.3
CDK5	ENSG00000164885	cyclin dependent kinase 5	230	6	FALSE	TRUE	FALSE	TRUE	FALSE	FALSE	FALSE	FALSE	FALSE	FALSE	FALSE	FALSE	[Isoform 1]: Cytoplasm	0	7	CHEMBL1230607	PHA-793887	FALSE	1	FALSE	Reactome	Regulation of TP53 Activity	2	0	1	3	2	0	42.3
CDK5	ENSG00000164885	cyclin dependent kinase 5	230	6	FALSE	TRUE	FALSE	TRUE	FALSE	FALSE	FALSE	FALSE	FALSE	FALSE	FALSE	FALSE	[Isoform 1]: Cytoplasm	0	7	CHEMBL2103840	DINACICLIB	FALSE	3	FALSE	Reactome	Regulation of TP53 Activity	2	0	1	3	2	0	42.3
CDK5	ENSG00000164885	cyclin dependent kinase 5	230	6	FALSE	TRUE	FALSE	TRUE	FALSE	FALSE	FALSE	FALSE	FALSE	FALSE	FALSE	FALSE	[Isoform 1]: Cytoplasm	0	7	CHEMBL1230607	PHA-793887	FALSE	1	FALSE	Reactome	Transcriptional Regulation by TP53	2	0	1	3	2	0	42.3
CDK5	ENSG00000164885	cyclin dependent kinase 5	230	6	FALSE	TRUE	FALSE	TRUE	FALSE	FALSE	FALSE	FALSE	FALSE	FALSE	FALSE	FALSE	[Isoform 1]: Cytoplasm	0	7	CHEMBL14762	SELICICLIB	FALSE	2	FALSE	Reactome	Transcriptional Regulation by TP53	2	0	1	3	2	0	42.3
CDK5	ENSG00000164885	cyclin dependent kinase 5	230	6	FALSE	TRUE	FALSE	TRUE	FALSE	FALSE	FALSE	FALSE	FALSE	FALSE	FALSE	FALSE	[Isoform 1]: Cytoplasm	0	7	CHEMBL2103840	DINACICLIB	FALSE	3	FALSE	Reactome	Regulation of TP53 Activity	2	0	1	3	2	0	42.3
CDK5	ENSG00000164885	cyclin dependent kinase 5	230	6	FALSE	TRUE	FALSE	TRUE	FALSE	FALSE	FALSE	FALSE	FALSE	FALSE	FALSE	FALSE	[Isoform 1]: Cytoplasm	0	7	CHEMBL2103840	DINACICLIB	FALSE	3	FALSE	Reactome	Regulation of TP53 Activity	2	0	1	3	2	0	42.3
CDK5	ENSG00000164885	cyclin dependent kinase 5	230	6	FALSE	TRUE	FALSE	TRUE	FALSE	FALSE	FALSE	FALSE	FALSE	FALSE	FALSE	FALSE	[Isoform 1]: Cytoplasm	0	7	CHEMBL2103840	DINACICLIB	FALSE	3	FALSE	Reactome	Transcriptional Regulation by TP53	2	0	1	3	2	0	42.3
TUBB4B	ENSG00000188229	tubulin beta 4B class IVb	413	4	TRUE	FALSE	FALSE	TRUE	TRUE	FALSE	FALSE	FALSE	FALSE	FALSE	TRUE	FALSE	Cytoplasm	0	59	CHEMBL107	COLCHICINE	TRUE	4	FALSE	Reactome	Mitotic Prometaphase	2	10	0	0	0	10	41.73
TUBB4B	ENSG00000188229	tubulin beta 4B class IVb	413	4	TRUE	FALSE	FALSE	TRUE	TRUE	FALSE	FALSE	FALSE	FALSE	FALSE	TRUE	FALSE	Cytoplasm	0	59	CHEMBL1683544	ERIBULIN MESYLATE	TRUE	4	FALSE	Reactome	Mitotic Prometaphase	2	10	0	0	0	10	41.73
TUBB4B	ENSG00000188229	tubulin beta 4B class IVb	413	4	TRUE	FALSE	FALSE	TRUE	TRUE	FALSE	FALSE	FALSE	FALSE	FALSE	TRUE	FALSE	Cytoplasm	0	59	CHEMBL159	VINBLASTINE	TRUE	4	FALSE	Reactome	Anchoring of the basal body to the plasma membrane	2	10	0	0	0	10	41.73
TUBB4B	ENSG00000188229	tubulin beta 4B class IVb	413	4	TRUE	FALSE	FALSE	TRUE	TRUE	FALSE	FALSE	FALSE	FALSE	FALSE	TRUE	FALSE	Cytoplasm	0	59	CHEMBL1683590	ERIBULIN	TRUE	4	FALSE	Reactome	Anchoring of the basal body to the plasma membrane	2	10	0	0	0	10	41.73
TUBB4B	ENSG00000188229	tubulin beta 4B class IVb	413	4	TRUE	FALSE	FALSE	TRUE	TRUE	FALSE	FALSE	FALSE	FALSE	FALSE	TRUE	FALSE	Cytoplasm	0	59	CHEMBL107	COLCHICINE	TRUE	4	FALSE	Reactome	Anchoring of the basal body to the plasma membrane	2	10	0	0	0	10	41.73
TUBB4B	ENSG00000188229	tubulin beta 4B class IVb	413	4	TRUE	FALSE	FALSE	TRUE	TRUE	FALSE	FALSE	FALSE	FALSE	FALSE	TRUE	FALSE	Cytoplasm	0	59	CHEMBL1683544	ERIBULIN MESYLATE	TRUE	4	FALSE	Reactome	Mitotic Prometaphase	2	10	0	0	0	10	41.73
TUBB4B	ENSG00000188229	tubulin beta 4B class IVb	413	4	TRUE	FALSE	FALSE	TRUE	TRUE	FALSE	FALSE	FALSE	FALSE	FALSE	TRUE	FALSE	Cytoplasm	0	59	CHEMBL90555	VINCRISTINE	TRUE	4	FALSE	Reactome	Mitotic Prometaphase	2	10	0	0	0	10	41.73
TUBB4B	ENSG00000188229	tubulin beta 4B class IVb	413	4	TRUE	FALSE	FALSE	TRUE	TRUE	FALSE	FALSE	FALSE	FALSE	FALSE	TRUE	FALSE	Cytoplasm	0	59	CHEMBL107	COLCHICINE	TRUE	4	FALSE	Reactome	Mitotic Prometaphase	2	10	0	0	0	10	41.73
TUBB4B	ENSG00000188229	tubulin beta 4B class IVb	413	4	TRUE	FALSE	FALSE	TRUE	TRUE	FALSE	FALSE	FALSE	FALSE	FALSE	TRUE	FALSE	Cytoplasm	0	59	CHEMBL428647	PACLITAXEL	TRUE	4	FALSE	Reactome	Anchoring of the basal body to the plasma membrane	2	10	0	0	0	10	41.73
TUBB4B	ENSG00000188229	tubulin beta 4B class IVb	413	4	TRUE	FALSE	FALSE	TRUE	TRUE	FALSE	FALSE	FALSE	FALSE	FALSE	TRUE	FALSE	Cytoplasm	0	59	CHEMBL107	COLCHICINE	TRUE	4	FALSE	Reactome	Anchoring of the basal body to the plasma membrane	2	10	0	0	0	10	41.73
TUBB4B	ENSG00000188229	tubulin beta 4B class IVb	413	4	TRUE	FALSE	FALSE	TRUE	TRUE	FALSE	FALSE	FALSE	FALSE	FALSE	TRUE	FALSE	Cytoplasm	0	59	CHEMBL107	COLCHICINE	TRUE	4	FALSE	Reactome	Anchoring of the basal body to the plasma membrane	2	10	0	0	0	10	41.73
TUBB4B	ENSG00000188229	tubulin beta 4B class IVb	413	4	TRUE	FALSE	FALSE	TRUE	TRUE	FALSE	FALSE	FALSE	FALSE	FALSE	TRUE	FALSE	Cytoplasm	0	59	CHEMBL107	COLCHICINE	TRUE	4	FALSE	Reactome	Anchoring of the basal body to the plasma membrane	2	10	0	0	0	10	41.73
TUBB4B	ENSG00000188229	tubulin beta 4B class IVb	413	4	TRUE	FALSE	FALSE	TRUE	TRUE	FALSE	FALSE	FALSE	FALSE	FALSE	TRUE	FALSE	Cytoplasm	0	59	CHEMBL92	DOCETAXEL	TRUE	4	FALSE	Reactome	Mitotic Prometaphase	2	10	0	0	0	10	41.73
TUBB4B	ENSG00000188229	tubulin beta 4B class IVb	413	4	TRUE	FALSE	FALSE	TRUE	TRUE	FALSE	FALSE	FALSE	FALSE	FALSE	TRUE	FALSE	Cytoplasm	0	59	CHEMBL92	DOCETAXEL	TRUE	4	FALSE	Reactome	Anchoring of the basal body to the plasma membrane	2	10	0	0	0	10	41.73
TUBB4B	ENSG00000188229	tubulin beta 4B class IVb	413	4	TRUE	FALSE	FALSE	TRUE	TRUE	FALSE	FALSE	FALSE	FALSE	FALSE	TRUE	FALSE	Cytoplasm	0	59	CHEMBL92	DOCETAXEL	TRUE	4	FALSE	Reactome	Mitotic Prometaphase	2	10	0	0	0	10	41.73
TUBB4B	ENSG00000188229	tubulin beta 4B class IVb	413	4	TRUE	FALSE	FALSE	TRUE	TRUE	FALSE	FALSE	FALSE	FALSE	FALSE	TRUE	FALSE	Cytoplasm	0	59	CHEMBL3545252	DOCETAXEL	TRUE	4	FALSE	Reactome	Mitotic Prometaphase	2	10	0	0	0	10	41.73
TUBB4B	ENSG00000188229	tubulin beta 4B class IVb	413	4	TRUE	FALSE	FALSE	TRUE	TRUE	FALSE	FALSE	FALSE	FALSE	FALSE	TRUE	FALSE	Cytoplasm	0	59	CHEMBL1743082	TRASTUZUMAB EMTANSINE	TRUE	4	FALSE	Reactome	Mitotic Prometaphase	2	10	0	0	0	10	41.73
TUBB4B	ENSG00000188229	tubulin beta 4B class IVb	413	4	TRUE	FALSE	FALSE	TRUE	TRUE	FALSE	FALSE	FALSE	FALSE	FALSE	TRUE	FALSE	Cytoplasm	0	59	CHEMBL1742994	BRENTUXIMAB VEDOTIN	TRUE	4	FALSE	Reactome	Mitotic Prometaphase	2	10	0	0	0	10	41.73
TUBB4B	ENSG00000188229	tubulin beta 4B class IVb	413	4	TRUE	FALSE	FALSE	TRUE	TRUE	FALSE	FALSE	FALSE	FALSE	FALSE	TRUE	FALSE	Cytoplasm	0	59	CHEMBL3545252	DOCETAXEL	TRUE	4	FALSE	Reactome	Mitotic Prometaphase	2	10	0	0	0	10	41.73
TUBB4B	ENSG00000188229	tubulin beta 4B class IVb	413	4	TRUE	FALSE	FALSE	TRUE	TRUE	FALSE	FALSE	FALSE	FALSE	FALSE	TRUE	FALSE	Cytoplasm	0	59	CHEMBL107	COLCHICINE	TRUE	4	FALSE	Reactome	Anchoring of the basal body to the plasma membrane	2	10	0	0	0	10	41.73
TUBB4B	ENSG00000188229	tubulin beta 4B class IVb	413	4	TRUE	FALSE	FALSE	TRUE	TRUE	FALSE	FALSE	FALSE	FALSE	FALSE	TRUE	FALSE	Cytoplasm	0	59	CHEMBL159	VINBLASTINE	TRUE	4	FALSE	Reactome	Mitotic Prometaphase	2	10	0	0	0	10	41.73
TUBB4B	ENSG00000188229	tubulin beta 4B class IVb	413	4	TRUE	FALSE	FALSE	TRUE	TRUE	FALSE	FALSE	FALSE	FALSE	FALSE	TRUE	FALSE	Cytoplasm	0	59	CHEMBL92	DOCETAXEL	TRUE	4	FALSE	Reactome	Anchoring of the basal body to the plasma membrane	2	10	0	0	0	10	41.73
TUBB4B	ENSG00000188229	tubulin beta 4B class IVb	413	4	TRUE	FALSE	FALSE	TRUE	TRUE	FALSE	FALSE	FALSE	FALSE	FALSE	TRUE	FALSE	Cytoplasm	0	59	CHEMBL3545252	DOCETAXEL	TRUE	4	FALSE	Reactome	Anchoring of the basal body to the plasma membrane	2	10	0	0	0	10	41.73
TUBB4B	ENSG00000188229	tubulin beta 4B class IVb	413	4	TRUE	FALSE	FALSE	TRUE	TRUE	FALSE	FALSE	FALSE	FALSE	FALSE	TRUE	FALSE	Cytoplasm	0	59	CHEMBL159	VINBLASTINE	TRUE	4	FALSE	Reactome	Anchoring of the basal body to the plasma membrane	2	10	0	0	0	10	41.73
TUBB4B	ENSG00000188229	tubulin beta 4B class IVb	413	4	TRUE	FALSE	FALSE	TRUE	TRUE	FALSE	FALSE	FALSE	FALSE	FALSE	TRUE	FALSE	Cytoplasm	0	59	CHEMBL107	COLCHICINE	TRUE	4	FALSE	Reactome	Mitotic Prometaphase	2	10	0	0	0	10	41.73
TUBB4B	ENSG00000188229	tubulin beta 4B class IVb	413	4	TRUE	FALSE	FALSE	TRUE	TRUE	FALSE	FALSE	FALSE	FALSE	FALSE	TRUE	FALSE	Cytoplasm	0	59	CHEMBL1683590	ERIBULIN	TRUE	4	FALSE	Reactome	Mitotic Prometaphase	2	10	0	0	0	10	41.73
TUBB4B	ENSG00000188229	tubulin beta 4B class IVb	413	4	TRUE	FALSE	FALSE	TRUE	TRUE	FALSE	FALSE	FALSE	FALSE	FALSE	TRUE	FALSE	Cytoplasm	0	59	CHEMBL1201752	IXABEPILONE	TRUE	4	FALSE	Reactome	Mitotic Prometaphase	2	10	0	0	0	10	41.73
TUBB4B	ENSG00000188229	tubulin beta 4B class IVb	413	4	TRUE	FALSE	FALSE	TRUE	TRUE	FALSE	FALSE	FALSE	FALSE	FALSE	TRUE	FALSE	Cytoplasm	0	59	CHEMBL1742994	BRENTUXIMAB VEDOTIN	TRUE	4	FALSE	Reactome	Anchoring of the basal body to the plasma membrane	2	10	0	0	0	10	41.73
TUBB4B	ENSG00000188229	tubulin beta 4B class IVb	413	4	TRUE	FALSE	FALSE	TRUE	TRUE	FALSE	FALSE	FALSE	FALSE	FALSE	TRUE	FALSE	Cytoplasm	0	59	CHEMBL3545252	DOCETAXEL	TRUE	4	FALSE	Reactome	Anchoring of the basal body to the plasma membrane	2	10	0	0	0	10	41.73
TUBB4B	ENSG00000188229	tubulin beta 4B class IVb	413	4	TRUE	FALSE	FALSE	TRUE	TRUE	FALSE	FALSE	FALSE	FALSE	FALSE	TRUE	FALSE	Cytoplasm	0	59	CHEMBL1742994	BRENTUXIMAB VEDOTIN	TRUE	4	FALSE	Reactome	Mitotic Prometaphase	2	10	0	0	0	10	41.73
TUBB4B	ENSG00000188229	tubulin beta 4B class IVb	413	4	TRUE	FALSE	FALSE	TRUE	TRUE	FALSE	FALSE	FALSE	FALSE	FALSE	TRUE	FALSE	Cytoplasm	0	59	CHEMBL107	COLCHICINE	TRUE	4	FALSE	Reactome	Mitotic Prometaphase	2	10	0	0	0	10	41.73
TUBB4B	ENSG00000188229	tubulin beta 4B class IVb	413	4	TRUE	FALSE	FALSE	TRUE	TRUE	FALSE	FALSE	FALSE	FALSE	FALSE	TRUE	FALSE	Cytoplasm	0	59	CHEMBL3545252	DOCETAXEL	TRUE	4	FALSE	Reactome	Anchoring of the basal body to the plasma membrane	2	10	0	0	0	10	41.73
TUBB4B	ENSG00000188229	tubulin beta 4B class IVb	413	4	TRUE	FALSE	FALSE	TRUE	TRUE	FALSE	FALSE	FALSE	FALSE	FALSE	TRUE	FALSE	Cytoplasm	0	59	CHEMBL90555	VINCRISTINE	TRUE	4	FALSE	Reactome	Mitotic Prometaphase	2	10	0	0	0	10	41.73
TUBB4B	ENSG00000188229	tubulin beta 4B class IVb	413	4	TRUE	FALSE	FALSE	TRUE	TRUE	FALSE	FALSE	FALSE	FALSE	FALSE	TRUE	FALSE	Cytoplasm	0	59	CHEMBL428647	PACLITAXEL	TRUE	4	FALSE	Reactome	Anchoring of the basal body to the plasma membrane	2	10	0	0	0	10	41.73
TUBB4B	ENSG00000188229	tubulin beta 4B class IVb	413	4	TRUE	FALSE	FALSE	TRUE	TRUE	FALSE	FALSE	FALSE	FALSE	FALSE	TRUE	FALSE	Cytoplasm	0	59	CHEMBL159	VINBLASTINE	TRUE	4	FALSE	Reactome	Mitotic Prometaphase	2	10	0	0	0	10	41.73
TUBB4B	ENSG00000188229	tubulin beta 4B class IVb	413	4	TRUE	FALSE	FALSE	TRUE	TRUE	FALSE	FALSE	FALSE	FALSE	FALSE	TRUE	FALSE	Cytoplasm	0	59	CHEMBL3545252	DOCETAXEL	TRUE	4	FALSE	Reactome	Mitotic Prometaphase	2	10	0	0	0	10	41.73
TUBB4B	ENSG00000188229	tubulin beta 4B class IVb	413	4	TRUE	FALSE	FALSE	TRUE	TRUE	FALSE	FALSE	FALSE	FALSE	FALSE	TRUE	FALSE	Cytoplasm	0	59	CHEMBL107	COLCHICINE	TRUE	4	FALSE	Reactome	Mitotic Prometaphase	2	10	0	0	0	10	41.73
TUBB4B	ENSG00000188229	tubulin beta 4B class IVb	413	4	TRUE	FALSE	FALSE	TRUE	TRUE	FALSE	FALSE	FALSE	FALSE	FALSE	TRUE	FALSE	Cytoplasm	0	59	CHEMBL1742994	BRENTUXIMAB VEDOTIN	TRUE	4	FALSE	Reactome	Anchoring of the basal body to the plasma membrane	2	10	0	0	0	10	41.73
TUBB4B	ENSG00000188229	tubulin beta 4B class IVb	413	4	TRUE	FALSE	FALSE	TRUE	TRUE	FALSE	FALSE	FALSE	FALSE	FALSE	TRUE	FALSE	Cytoplasm	0	59	CHEMBL107	COLCHICINE	TRUE	4	FALSE	Reactome	Anchoring of the basal body to the plasma membrane	2	10	0	0	0	10	41.73
TUBB4B	ENSG00000188229	tubulin beta 4B class IVb	413	4	TRUE	FALSE	FALSE	TRUE	TRUE	FALSE	FALSE	FALSE	FALSE	FALSE	TRUE	FALSE	Cytoplasm	0	59	CHEMBL1683544	ERIBULIN MESYLATE	TRUE	4	FALSE	Reactome	Anchoring of the basal body to the plasma membrane	2	10	0	0	0	10	41.73
TUBB4B	ENSG00000188229	tubulin beta 4B class IVb	413	4	TRUE	FALSE	FALSE	TRUE	TRUE	FALSE	FALSE	FALSE	FALSE	FALSE	TRUE	FALSE	Cytoplasm	0	59	CHEMBL92	DOCETAXEL	TRUE	4	FALSE	Reactome	Mitotic Prometaphase	2	10	0	0	0	10	41.73
TUBB4B	ENSG00000188229	tubulin beta 4B class IVb	413	4	TRUE	FALSE	FALSE	TRUE	TRUE	FALSE	FALSE	FALSE	FALSE	FALSE	TRUE	FALSE	Cytoplasm	0	59	CHEMBL92	DOCETAXEL	TRUE	4	FALSE	Reactome	Anchoring of the basal body to the plasma membrane	2	10	0	0	0	10	41.73
TUBB4B	ENSG00000188229	tubulin beta 4B class IVb	413	4	TRUE	FALSE	FALSE	TRUE	TRUE	FALSE	FALSE	FALSE	FALSE	FALSE	TRUE	FALSE	Cytoplasm	0	59	CHEMBL1743082	TRASTUZUMAB EMTANSINE	TRUE	4	FALSE	Reactome	Anchoring of the basal body to the plasma membrane	2	10	0	0	0	10	41.73
TUBB4B	ENSG00000188229	tubulin beta 4B class IVb	413	4	TRUE	FALSE	FALSE	TRUE	TRUE	FALSE	FALSE	FALSE	FALSE	FALSE	TRUE	FALSE	Cytoplasm	0	59	CHEMBL107	COLCHICINE	TRUE	4	FALSE	Reactome	Mitotic Prometaphase	2	10	0	0	0	10	41.73
TUBB4B	ENSG00000188229	tubulin beta 4B class IVb	413	4	TRUE	FALSE	FALSE	TRUE	TRUE	FALSE	FALSE	FALSE	FALSE	FALSE	TRUE	FALSE	Cytoplasm	0	59	CHEMBL90555	VINCRISTINE	TRUE	4	FALSE	Reactome	Anchoring of the basal body to the plasma membrane	2	10	0	0	0	10	41.73
TUBB4B	ENSG00000188229	tubulin beta 4B class IVb	413	4	TRUE	FALSE	FALSE	TRUE	TRUE	FALSE	FALSE	FALSE	FALSE	FALSE	TRUE	FALSE	Cytoplasm	0	59	CHEMBL90555	VINCRISTINE	TRUE	4	FALSE	Reactome	Anchoring of the basal body to the plasma membrane	2	10	0	0	0	10	41.73
TUBB4B	ENSG00000188229	tubulin beta 4B class IVb	413	4	TRUE	FALSE	FALSE	TRUE	TRUE	FALSE	FALSE	FALSE	FALSE	FALSE	TRUE	FALSE	Cytoplasm	0	59	CHEMBL428647	PACLITAXEL	TRUE	4	FALSE	Reactome	Mitotic Prometaphase	2	10	0	0	0	10	41.73
TUBB4B	ENSG00000188229	tubulin beta 4B class IVb	413	4	TRUE	FALSE	FALSE	TRUE	TRUE	FALSE	FALSE	FALSE	FALSE	FALSE	TRUE	FALSE	Cytoplasm	0	59	CHEMBL1683544	ERIBULIN MESYLATE	TRUE	4	FALSE	Reactome	Anchoring of the basal body to the plasma membrane	2	10	0	0	0	10	41.73
TUBB4B	ENSG00000188229	tubulin beta 4B class IVb	413	4	TRUE	FALSE	FALSE	TRUE	TRUE	FALSE	FALSE	FALSE	FALSE	FALSE	TRUE	FALSE	Cytoplasm	0	59	CHEMBL428647	PACLITAXEL	TRUE	4	FALSE	Reactome	Mitotic Prometaphase	2	10	0	0	0	10	41.73
TUBB4B	ENSG00000188229	tubulin beta 4B class IVb	413	4	TRUE	FALSE	FALSE	TRUE	TRUE	FALSE	FALSE	FALSE	FALSE	FALSE	TRUE	FALSE	Cytoplasm	0	59	CHEMBL1201752	IXABEPILONE	TRUE	4	FALSE	Reactome	Anchoring of the basal body to the plasma membrane	2	10	0	0	0	10	41.73
PIK3R3	ENSG00000117461	phosphoinositide-3-kinase regulatory subunit 3	172	2	FALSE	TRUE	FALSE	FALSE	FALSE	FALSE	FALSE	FALSE	FALSE	FALSE	FALSE	FALSE	Vesicles	0	24	CHEMBL1922094	APITOLISIB	FALSE	2	FALSE	Reactome	Cytokine Signaling in Immune system	2	0	3	6	0	0	41.22
PIK3R3	ENSG00000117461	phosphoinositide-3-kinase regulatory subunit 3	172	2	FALSE	TRUE	FALSE	FALSE	FALSE	FALSE	FALSE	FALSE	FALSE	FALSE	FALSE	FALSE	Vesicles	0	24	CHEMBL2017974	BUPARLISIB	FALSE	3	FALSE	KEGG	HIF-1 signaling pathway	2	0	3	6	0	0	41.22
PIK3R3	ENSG00000117461	phosphoinositide-3-kinase regulatory subunit 3	172	2	FALSE	TRUE	FALSE	FALSE	FALSE	FALSE	FALSE	FALSE	FALSE	FALSE	FALSE	FALSE	Vesicles	0	24	CHEMBL2387080	TASELISIB	FALSE	3	FALSE	KEGG	HIF-1 signaling pathway	2	0	3	6	0	0	41.22
PIK3R3	ENSG00000117461	phosphoinositide-3-kinase regulatory subunit 3	172	2	FALSE	TRUE	FALSE	FALSE	FALSE	FALSE	FALSE	FALSE	FALSE	FALSE	FALSE	FALSE	Vesicles	0	24	CHEMBL592445	GEDATOLISIB	FALSE	2	FALSE	Reactome	Cytokine Signaling in Immune system	2	0	3	6	0	0	41.22
PIK3R3	ENSG00000117461	phosphoinositide-3-kinase regulatory subunit 3	172	2	FALSE	TRUE	FALSE	FALSE	FALSE	FALSE	FALSE	FALSE	FALSE	FALSE	FALSE	FALSE	Vesicles	0	24	CHEMBL1879463	DACTOLISIB	FALSE	3	FALSE	Reactome	Cytokine Signaling in Immune system	2	0	3	6	0	0	41.22
PIK3R3	ENSG00000117461	phosphoinositide-3-kinase regulatory subunit 3	172	2	FALSE	TRUE	FALSE	FALSE	FALSE	FALSE	FALSE	FALSE	FALSE	FALSE	FALSE	FALSE	Vesicles	0	24	CHEMBL592445	GEDATOLISIB	FALSE	2	FALSE	KEGG	HIF-1 signaling pathway	2	0	3	6	0	0	41.22
PIK3R3	ENSG00000117461	phosphoinositide-3-kinase regulatory subunit 3	172	2	FALSE	TRUE	FALSE	FALSE	FALSE	FALSE	FALSE	FALSE	FALSE	FALSE	FALSE	FALSE	Vesicles	0	24	CHEMBL2017974	BUPARLISIB	FALSE	3	FALSE	KEGG	HIF-1 signaling pathway	2	0	3	6	0	0	41.22
PIK3R3	ENSG00000117461	phosphoinositide-3-kinase regulatory subunit 3	172	2	FALSE	TRUE	FALSE	FALSE	FALSE	FALSE	FALSE	FALSE	FALSE	FALSE	FALSE	FALSE	Vesicles	0	24	CHEMBL3813842	PAXALISIB	FALSE	2	FALSE	Reactome	Cytokine Signaling in Immune system	2	0	3	6	0	0	41.22
PIK3R3	ENSG00000117461	phosphoinositide-3-kinase regulatory subunit 3	172	2	FALSE	TRUE	FALSE	FALSE	FALSE	FALSE	FALSE	FALSE	FALSE	FALSE	FALSE	FALSE	Vesicles	0	24	CHEMBL1922094	APITOLISIB	FALSE	2	FALSE	KEGG	HIF-1 signaling pathway	2	0	3	6	0	0	41.22
PIK3R3	ENSG00000117461	phosphoinositide-3-kinase regulatory subunit 3	172	2	FALSE	TRUE	FALSE	FALSE	FALSE	FALSE	FALSE	FALSE	FALSE	FALSE	FALSE	FALSE	Vesicles	0	24	CHEMBL2017974	BUPARLISIB	FALSE	3	FALSE	Reactome	Cytokine Signaling in Immune system	2	0	3	6	0	0	41.22
PIK3R3	ENSG00000117461	phosphoinositide-3-kinase regulatory subunit 3	172	2	FALSE	TRUE	FALSE	FALSE	FALSE	FALSE	FALSE	FALSE	FALSE	FALSE	FALSE	FALSE	Vesicles	0	24	CHEMBL2387080	TASELISIB	FALSE	3	FALSE	Reactome	Cytokine Signaling in Immune system	2	0	3	6	0	0	41.22
PIK3R3	ENSG00000117461	phosphoinositide-3-kinase regulatory subunit 3	172	2	FALSE	TRUE	FALSE	FALSE	FALSE	FALSE	FALSE	FALSE	FALSE	FALSE	FALSE	FALSE	Vesicles	0	24	CHEMBL2387080	TASELISIB	FALSE	3	FALSE	KEGG	HIF-1 signaling pathway	2	0	3	6	0	0	41.22
PIK3R3	ENSG00000117461	phosphoinositide-3-kinase regulatory subunit 3	172	2	FALSE	TRUE	FALSE	FALSE	FALSE	FALSE	FALSE	FALSE	FALSE	FALSE	FALSE	FALSE	Vesicles	0	24	CHEMBL2387080	TASELISIB	FALSE	3	FALSE	Reactome	Cytokine Signaling in Immune system	2	0	3	6	0	0	41.22
PIK3R3	ENSG00000117461	phosphoinositide-3-kinase regulatory subunit 3	172	2	FALSE	TRUE	FALSE	FALSE	FALSE	FALSE	FALSE	FALSE	FALSE	FALSE	FALSE	FALSE	Vesicles	0	24	CHEMBL3545366	VOXTALISIB	FALSE	2	FALSE	Reactome	Cytokine Signaling in Immune system	2	0	3	6	0	0	41.22
PIK3R3	ENSG00000117461	phosphoinositide-3-kinase regulatory subunit 3	172	2	FALSE	TRUE	FALSE	FALSE	FALSE	FALSE	FALSE	FALSE	FALSE	FALSE	FALSE	FALSE	Vesicles	0	24	CHEMBL2017974	BUPARLISIB	FALSE	3	FALSE	KEGG	HIF-1 signaling pathway	2	0	3	6	0	0	41.22
PIK3R3	ENSG00000117461	phosphoinositide-3-kinase regulatory subunit 3	172	2	FALSE	TRUE	FALSE	FALSE	FALSE	FALSE	FALSE	FALSE	FALSE	FALSE	FALSE	FALSE	Vesicles	0	24	CHEMBL2017974	BUPARLISIB	FALSE	3	FALSE	KEGG	HIF-1 signaling pathway	2	0	3	6	0	0	41.22
PIK3R3	ENSG00000117461	phosphoinositide-3-kinase regulatory subunit 3	172	2	FALSE	TRUE	FALSE	FALSE	FALSE	FALSE	FALSE	FALSE	FALSE	FALSE	FALSE	FALSE	Vesicles	0	24	CHEMBL3813842	PAXALISIB	FALSE	2	FALSE	KEGG	HIF-1 signaling pathway	2	0	3	6	0	0	41.22
PIK3R3	ENSG00000117461	phosphoinositide-3-kinase regulatory subunit 3	172	2	FALSE	TRUE	FALSE	FALSE	FALSE	FALSE	FALSE	FALSE	FALSE	FALSE	FALSE	FALSE	Vesicles	0	24	CHEMBL592445	GEDATOLISIB	FALSE	2	FALSE	KEGG	HIF-1 signaling pathway	2	0	3	6	0	0	41.22
PIK3R3	ENSG00000117461	phosphoinositide-3-kinase regulatory subunit 3	172	2	FALSE	TRUE	FALSE	FALSE	FALSE	FALSE	FALSE	FALSE	FALSE	FALSE	FALSE	FALSE	Vesicles	0	24	CHEMBL1879463	DACTOLISIB	FALSE	3	FALSE	KEGG	HIF-1 signaling pathway	2	0	3	6	0	0	41.22
PIK3R3	ENSG00000117461	phosphoinositide-3-kinase regulatory subunit 3	172	2	FALSE	TRUE	FALSE	FALSE	FALSE	FALSE	FALSE	FALSE	FALSE	FALSE	FALSE	FALSE	Vesicles	0	24	CHEMBL592445	GEDATOLISIB	FALSE	2	FALSE	Reactome	Cytokine Signaling in Immune system	2	0	3	6	0	0	41.22
PIK3R3	ENSG00000117461	phosphoinositide-3-kinase regulatory subunit 3	172	2	FALSE	TRUE	FALSE	FALSE	FALSE	FALSE	FALSE	FALSE	FALSE	FALSE	FALSE	FALSE	Vesicles	0	24	CHEMBL3545366	VOXTALISIB	FALSE	2	FALSE	KEGG	HIF-1 signaling pathway	2	0	3	6	0	0	41.22
PIK3R3	ENSG00000117461	phosphoinositide-3-kinase regulatory subunit 3	172	2	FALSE	TRUE	FALSE	FALSE	FALSE	FALSE	FALSE	FALSE	FALSE	FALSE	FALSE	FALSE	Vesicles	0	24	CHEMBL1879463	DACTOLISIB	FALSE	3	FALSE	Reactome	Cytokine Signaling in Immune system	2	0	3	6	0	0	41.22
PIK3R3	ENSG00000117461	phosphoinositide-3-kinase regulatory subunit 3	172	2	FALSE	TRUE	FALSE	FALSE	FALSE	FALSE	FALSE	FALSE	FALSE	FALSE	FALSE	FALSE	Vesicles	0	24	CHEMBL2387080	TASELISIB	FALSE	3	FALSE	Reactome	Cytokine Signaling in Immune system	2	0	3	6	0	0	41.22
PIK3R3	ENSG00000117461	phosphoinositide-3-kinase regulatory subunit 3	172	2	FALSE	TRUE	FALSE	FALSE	FALSE	FALSE	FALSE	FALSE	FALSE	FALSE	FALSE	FALSE	Vesicles	0	24	CHEMBL2387080	TASELISIB	FALSE	3	FALSE	KEGG	HIF-1 signaling pathway	2	0	3	6	0	0	41.22
PIK3R3	ENSG00000117461	phosphoinositide-3-kinase regulatory subunit 3	172	2	FALSE	TRUE	FALSE	FALSE	FALSE	FALSE	FALSE	FALSE	FALSE	FALSE	FALSE	FALSE	Vesicles	0	24	CHEMBL592445	GEDATOLISIB	FALSE	2	FALSE	KEGG	HIF-1 signaling pathway	2	0	3	6	0	0	41.22
PIK3R3	ENSG00000117461	phosphoinositide-3-kinase regulatory subunit 3	172	2	FALSE	TRUE	FALSE	FALSE	FALSE	FALSE	FALSE	FALSE	FALSE	FALSE	FALSE	FALSE	Vesicles	0	24	CHEMBL2017974	BUPARLISIB	FALSE	3	FALSE	Reactome	Cytokine Signaling in Immune system	2	0	3	6	0	0	41.22
PIK3R3	ENSG00000117461	phosphoinositide-3-kinase regulatory subunit 3	172	2	FALSE	TRUE	FALSE	FALSE	FALSE	FALSE	FALSE	FALSE	FALSE	FALSE	FALSE	FALSE	Vesicles	0	24	CHEMBL1879463	DACTOLISIB	FALSE	3	FALSE	KEGG	HIF-1 signaling pathway	2	0	3	6	0	0	41.22
PIK3R3	ENSG00000117461	phosphoinositide-3-kinase regulatory subunit 3	172	2	FALSE	TRUE	FALSE	FALSE	FALSE	FALSE	FALSE	FALSE	FALSE	FALSE	FALSE	FALSE	Vesicles	0	24	CHEMBL1879463	DACTOLISIB	FALSE	3	FALSE	Reactome	Cytokine Signaling in Immune system	2	0	3	6	0	0	41.22
PIK3R3	ENSG00000117461	phosphoinositide-3-kinase regulatory subunit 3	172	2	FALSE	TRUE	FALSE	FALSE	FALSE	FALSE	FALSE	FALSE	FALSE	FALSE	FALSE	FALSE	Vesicles	0	24	CHEMBL1879463	DACTOLISIB	FALSE	3	FALSE	KEGG	HIF-1 signaling pathway	2	0	3	6	0	0	41.22
PIK3R3	ENSG00000117461	phosphoinositide-3-kinase regulatory subunit 3	172	2	FALSE	TRUE	FALSE	FALSE	FALSE	FALSE	FALSE	FALSE	FALSE	FALSE	FALSE	FALSE	Vesicles	0	24	CHEMBL2017974	BUPARLISIB	FALSE	3	FALSE	KEGG	HIF-1 signaling pathway	2	0	3	6	0	0	41.22
PIK3R3	ENSG00000117461	phosphoinositide-3-kinase regulatory subunit 3	172	2	FALSE	TRUE	FALSE	FALSE	FALSE	FALSE	FALSE	FALSE	FALSE	FALSE	FALSE	FALSE	Vesicles	0	24	CHEMBL1879463	DACTOLISIB	FALSE	3	FALSE	KEGG	HIF-1 signaling pathway	2	0	3	6	0	0	41.22
PIK3R3	ENSG00000117461	phosphoinositide-3-kinase regulatory subunit 3	172	2	FALSE	TRUE	FALSE	FALSE	FALSE	FALSE	FALSE	FALSE	FALSE	FALSE	FALSE	FALSE	Vesicles	0	24	CHEMBL4297181	SAMOTOLISIB	FALSE	2	FALSE	KEGG	HIF-1 signaling pathway	2	0	3	6	0	0	41.22
PIK3R3	ENSG00000117461	phosphoinositide-3-kinase regulatory subunit 3	172	2	FALSE	TRUE	FALSE	FALSE	FALSE	FALSE	FALSE	FALSE	FALSE	FALSE	FALSE	FALSE	Vesicles	0	24	CHEMBL1922094	APITOLISIB	FALSE	2	FALSE	Reactome	Cytokine Signaling in Immune system	2	0	3	6	0	0	41.22
PIK3R3	ENSG00000117461	phosphoinositide-3-kinase regulatory subunit 3	172	2	FALSE	TRUE	FALSE	FALSE	FALSE	FALSE	FALSE	FALSE	FALSE	FALSE	FALSE	FALSE	Vesicles	0	24	CHEMBL1234354	PF-04691502	FALSE	2	FALSE	KEGG	HIF-1 signaling pathway	2	0	3	6	0	0	41.22
PIK3R3	ENSG00000117461	phosphoinositide-3-kinase regulatory subunit 3	172	2	FALSE	TRUE	FALSE	FALSE	FALSE	FALSE	FALSE	FALSE	FALSE	FALSE	FALSE	FALSE	Vesicles	0	24	CHEMBL2387080	TASELISIB	FALSE	3	FALSE	Reactome	Cytokine Signaling in Immune system	2	0	3	6	0	0	41.22
PIK3R3	ENSG00000117461	phosphoinositide-3-kinase regulatory subunit 3	172	2	FALSE	TRUE	FALSE	FALSE	FALSE	FALSE	FALSE	FALSE	FALSE	FALSE	FALSE	FALSE	Vesicles	0	24	CHEMBL1879463	DACTOLISIB	FALSE	3	FALSE	Reactome	Cytokine Signaling in Immune system	2	0	3	6	0	0	41.22
PIK3R3	ENSG00000117461	phosphoinositide-3-kinase regulatory subunit 3	172	2	FALSE	TRUE	FALSE	FALSE	FALSE	FALSE	FALSE	FALSE	FALSE	FALSE	FALSE	FALSE	Vesicles	0	24	CHEMBL592445	GEDATOLISIB	FALSE	2	FALSE	KEGG	HIF-1 signaling pathway	2	0	3	6	0	0	41.22
PIK3R3	ENSG00000117461	phosphoinositide-3-kinase regulatory subunit 3	172	2	FALSE	TRUE	FALSE	FALSE	FALSE	FALSE	FALSE	FALSE	FALSE	FALSE	FALSE	FALSE	Vesicles	0	24	CHEMBL4297181	SAMOTOLISIB	FALSE	2	FALSE	Reactome	Cytokine Signaling in Immune system	2	0	3	6	0	0	41.22
PIK3R3	ENSG00000117461	phosphoinositide-3-kinase regulatory subunit 3	172	2	FALSE	TRUE	FALSE	FALSE	FALSE	FALSE	FALSE	FALSE	FALSE	FALSE	FALSE	FALSE	Vesicles	0	24	CHEMBL2017974	BUPARLISIB	FALSE	3	FALSE	Reactome	Cytokine Signaling in Immune system	2	0	3	6	0	0	41.22
PIK3R3	ENSG00000117461	phosphoinositide-3-kinase regulatory subunit 3	172	2	FALSE	TRUE	FALSE	FALSE	FALSE	FALSE	FALSE	FALSE	FALSE	FALSE	FALSE	FALSE	Vesicles	0	24	CHEMBL592445	GEDATOLISIB	FALSE	2	FALSE	Reactome	Cytokine Signaling in Immune system	2	0	3	6	0	0	41.22
PIK3R3	ENSG00000117461	phosphoinositide-3-kinase regulatory subunit 3	172	2	FALSE	TRUE	FALSE	FALSE	FALSE	FALSE	FALSE	FALSE	FALSE	FALSE	FALSE	FALSE	Vesicles	0	24	CHEMBL3813842	PAXALISIB	FALSE	2	FALSE	KEGG	HIF-1 signaling pathway	2	0	3	6	0	0	41.22
PIK3R3	ENSG00000117461	phosphoinositide-3-kinase regulatory subunit 3	172	2	FALSE	TRUE	FALSE	FALSE	FALSE	FALSE	FALSE	FALSE	FALSE	FALSE	FALSE	FALSE	Vesicles	0	24	CHEMBL1922094	APITOLISIB	FALSE	2	FALSE	KEGG	HIF-1 signaling pathway	2	0	3	6	0	0	41.22
PIK3R3	ENSG00000117461	phosphoinositide-3-kinase regulatory subunit 3	172	2	FALSE	TRUE	FALSE	FALSE	FALSE	FALSE	FALSE	FALSE	FALSE	FALSE	FALSE	FALSE	Vesicles	0	24	CHEMBL1234354	PF-04691502	FALSE	2	FALSE	Reactome	Cytokine Signaling in Immune system	2	0	3	6	0	0	41.22
PIK3R3	ENSG00000117461	phosphoinositide-3-kinase regulatory subunit 3	172	2	FALSE	TRUE	FALSE	FALSE	FALSE	FALSE	FALSE	FALSE	FALSE	FALSE	FALSE	FALSE	Vesicles	0	24	CHEMBL4297181	SAMOTOLISIB	FALSE	2	FALSE	Reactome	Cytokine Signaling in Immune system	2	0	3	6	0	0	41.22
PIK3R3	ENSG00000117461	phosphoinositide-3-kinase regulatory subunit 3	172	2	FALSE	TRUE	FALSE	FALSE	FALSE	FALSE	FALSE	FALSE	FALSE	FALSE	FALSE	FALSE	Vesicles	0	24	CHEMBL592445	GEDATOLISIB	FALSE	2	FALSE	Reactome	Cytokine Signaling in Immune system	2	0	3	6	0	0	41.22
PIK3R3	ENSG00000117461	phosphoinositide-3-kinase regulatory subunit 3	172	2	FALSE	TRUE	FALSE	FALSE	FALSE	FALSE	FALSE	FALSE	FALSE	FALSE	FALSE	FALSE	Vesicles	0	24	CHEMBL2387080	TASELISIB	FALSE	3	FALSE	KEGG	HIF-1 signaling pathway	2	0	3	6	0	0	41.22
PIK3R3	ENSG00000117461	phosphoinositide-3-kinase regulatory subunit 3	172	2	FALSE	TRUE	FALSE	FALSE	FALSE	FALSE	FALSE	FALSE	FALSE	FALSE	FALSE	FALSE	Vesicles	0	24	CHEMBL3813842	PAXALISIB	FALSE	2	FALSE	Reactome	Cytokine Signaling in Immune system	2	0	3	6	0	0	41.22
PIK3R3	ENSG00000117461	phosphoinositide-3-kinase regulatory subunit 3	172	2	FALSE	TRUE	FALSE	FALSE	FALSE	FALSE	FALSE	FALSE	FALSE	FALSE	FALSE	FALSE	Vesicles	0	24	CHEMBL2017974	BUPARLISIB	FALSE	3	FALSE	Reactome	Cytokine Signaling in Immune system	2	0	3	6	0	0	41.22
PIK3R3	ENSG00000117461	phosphoinositide-3-kinase regulatory subunit 3	172	2	FALSE	TRUE	FALSE	FALSE	FALSE	FALSE	FALSE	FALSE	FALSE	FALSE	FALSE	FALSE	Vesicles	0	24	CHEMBL4297181	SAMOTOLISIB	FALSE	2	FALSE	KEGG	HIF-1 signaling pathway	2	0	3	6	0	0	41.22
PIK3R3	ENSG00000117461	phosphoinositide-3-kinase regulatory subunit 3	172	2	FALSE	TRUE	FALSE	FALSE	FALSE	FALSE	FALSE	FALSE	FALSE	FALSE	FALSE	FALSE	Vesicles	0	24	CHEMBL2017974	BUPARLISIB	FALSE	3	FALSE	Reactome	Cytokine Signaling in Immune system	2	0	3	6	0	0	41.22
NR1H2	ENSG00000131408	nuclear receptor subfamily 1 group H member 2	128	5	FALSE	FALSE	TRUE	TRUE	FALSE	FALSE	FALSE	FALSE	FALSE	FALSE	FALSE	FALSE	Nucleus	3	4	CHEMBL3545047	BMS-852927	FALSE	1	FALSE	Reactome	SUMO E3 ligases SUMOylate target proteins	2	0	0	0	4	0	40.78
NR1H2	ENSG00000131408	nuclear receptor subfamily 1 group H member 2	128	5	FALSE	FALSE	TRUE	TRUE	FALSE	FALSE	FALSE	FALSE	FALSE	FALSE	FALSE	FALSE	Nucleus	3	4	CHEMBL573677	RGX-104	FALSE	1	FALSE	Reactome	SUMOylation	2	0	0	0	4	0	40.78
NR1H2	ENSG00000131408	nuclear receptor subfamily 1 group H member 2	128	5	FALSE	FALSE	TRUE	TRUE	FALSE	FALSE	FALSE	FALSE	FALSE	FALSE	FALSE	FALSE	Nucleus	3	4	CHEMBL272621	HYODEOXYCHOLIC_ACID	FALSE	1	FALSE	Reactome	SUMO E3 ligases SUMOylate target proteins	2	0	0	0	4	0	40.78
NR1H2	ENSG00000131408	nuclear receptor subfamily 1 group H member 2	128	5	FALSE	FALSE	TRUE	TRUE	FALSE	FALSE	FALSE	FALSE	FALSE	FALSE	FALSE	FALSE	Nucleus	3	4	CHEMBL573677	RGX-104	FALSE	1	FALSE	Reactome	SUMO E3 ligases SUMOylate target proteins	2	0	0	0	4	0	40.78
NR1H2	ENSG00000131408	nuclear receptor subfamily 1 group H member 2	128	5	FALSE	FALSE	TRUE	TRUE	FALSE	FALSE	FALSE	FALSE	FALSE	FALSE	FALSE	FALSE	Nucleus	3	4	CHEMBL272621	HYODEOXYCHOLIC_ACID	FALSE	1	FALSE	Reactome	SUMOylation	2	0	0	0	4	0	40.78
NR1H2	ENSG00000131408	nuclear receptor subfamily 1 group H member 2	128	5	FALSE	FALSE	TRUE	TRUE	FALSE	FALSE	FALSE	FALSE	FALSE	FALSE	FALSE	FALSE	Nucleus	3	4	CHEMBL573677	RGX-104	FALSE	1	FALSE	Reactome	SUMOylation	2	0	0	0	4	0	40.78
NR1H2	ENSG00000131408	nuclear receptor subfamily 1 group H member 2	128	5	FALSE	FALSE	TRUE	TRUE	FALSE	FALSE	FALSE	FALSE	FALSE	FALSE	FALSE	FALSE	Nucleus	3	4	CHEMBL3545418	BMS-779788	FALSE	1	FALSE	Reactome	SUMOylation	2	0	0	0	4	0	40.78
NR1H2	ENSG00000131408	nuclear receptor subfamily 1 group H member 2	128	5	FALSE	FALSE	TRUE	TRUE	FALSE	FALSE	FALSE	FALSE	FALSE	FALSE	FALSE	FALSE	Nucleus	3	4	CHEMBL3545047	BMS-852927	FALSE	1	FALSE	Reactome	SUMOylation	2	0	0	0	4	0	40.78
NR1H2	ENSG00000131408	nuclear receptor subfamily 1 group H member 2	128	5	FALSE	FALSE	TRUE	TRUE	FALSE	FALSE	FALSE	FALSE	FALSE	FALSE	FALSE	FALSE	Nucleus	3	4	CHEMBL3545418	BMS-779788	FALSE	1	FALSE	Reactome	SUMO E3 ligases SUMOylate target proteins	2	0	0	0	4	0	40.78
NR1H2	ENSG00000131408	nuclear receptor subfamily 1 group H member 2	128	5	FALSE	FALSE	TRUE	TRUE	FALSE	FALSE	FALSE	FALSE	FALSE	FALSE	FALSE	FALSE	Nucleus	3	4	CHEMBL573677	RGX-104	FALSE	1	FALSE	Reactome	SUMO E3 ligases SUMOylate target proteins	2	0	0	0	4	0	40.78
ERBB2	ENSG00000141736	erb-b2 receptor tyrosine kinase 2	1110	7	TRUE	FALSE	FALSE	TRUE	TRUE	FALSE	FALSE	FALSE	FALSE	FALSE	TRUE	FALSE	Cell membrane	1	42	CHEMBL554	LAPATINIB	TRUE	4	FALSE	KEGG	HIF-1 signaling pathway	1	12	1	0	0	12	40.72
ERBB2	ENSG00000141736	erb-b2 receptor tyrosine kinase 2	1110	7	TRUE	FALSE	FALSE	TRUE	TRUE	FALSE	FALSE	FALSE	FALSE	FALSE	TRUE	FALSE	Cell membrane	1	42	CHEMBL3989868	TUCATINIB	TRUE	4	FALSE	KEGG	HIF-1 signaling pathway	1	12	1	0	0	12	40.72
ERBB2	ENSG00000141736	erb-b2 receptor tyrosine kinase 2	1110	7	TRUE	FALSE	FALSE	TRUE	TRUE	FALSE	FALSE	FALSE	FALSE	FALSE	TRUE	FALSE	Cell membrane	1	42	CHEMBL1173655	AFATINIB	TRUE	4	FALSE	KEGG	HIF-1 signaling pathway	1	12	1	0	0	12	40.72
ERBB2	ENSG00000141736	erb-b2 receptor tyrosine kinase 2	1110	7	TRUE	FALSE	FALSE	TRUE	TRUE	FALSE	FALSE	FALSE	FALSE	FALSE	TRUE	FALSE	Cell membrane	1	42	CHEMBL3544956	PYROTINIB	FALSE	3	FALSE	KEGG	HIF-1 signaling pathway	1	12	1	0	0	12	40.72
ERBB2	ENSG00000141736	erb-b2 receptor tyrosine kinase 2	1110	7	TRUE	FALSE	FALSE	TRUE	TRUE	FALSE	FALSE	FALSE	FALSE	FALSE	TRUE	FALSE	Cell membrane	1	42	CHEMBL180022	NERATINIB	TRUE	4	FALSE	KEGG	HIF-1 signaling pathway	1	12	1	0	0	12	40.72
ERBB2	ENSG00000141736	erb-b2 receptor tyrosine kinase 2	1110	7	TRUE	FALSE	FALSE	TRUE	TRUE	FALSE	FALSE	FALSE	FALSE	FALSE	TRUE	FALSE	Cell membrane	1	42	CHEMBL2105719	DACOMITINIB	TRUE	4	FALSE	KEGG	HIF-1 signaling pathway	1	12	1	0	0	12	40.72
ERBB2	ENSG00000141736	erb-b2 receptor tyrosine kinase 2	1110	7	TRUE	FALSE	FALSE	TRUE	TRUE	FALSE	FALSE	FALSE	FALSE	FALSE	TRUE	FALSE	Cell membrane	1	42	CHEMBL180022	NERATINIB	TRUE	4	FALSE	KEGG	HIF-1 signaling pathway	1	12	1	0	0	12	40.72
ERBB2	ENSG00000141736	erb-b2 receptor tyrosine kinase 2	1110	7	TRUE	FALSE	FALSE	TRUE	TRUE	FALSE	FALSE	FALSE	FALSE	FALSE	TRUE	FALSE	Cell membrane	1	42	CHEMBL3989921	NERATINIB MALEATE	TRUE	4	FALSE	KEGG	HIF-1 signaling pathway	1	12	1	0	0	12	40.72
ERBB2	ENSG00000141736	erb-b2 receptor tyrosine kinase 2	1110	7	TRUE	FALSE	FALSE	TRUE	TRUE	FALSE	FALSE	FALSE	FALSE	FALSE	TRUE	FALSE	Cell membrane	1	42	CHEMBL1743082	TRASTUZUMAB EMTANSINE	TRUE	4	FALSE	KEGG	HIF-1 signaling pathway	1	12	1	0	0	12	40.72
ERBB2	ENSG00000141736	erb-b2 receptor tyrosine kinase 2	1110	7	TRUE	FALSE	FALSE	TRUE	TRUE	FALSE	FALSE	FALSE	FALSE	FALSE	TRUE	FALSE	Cell membrane	1	42	CHEMBL1201585	TRASTUZUMAB	TRUE	4	FALSE	KEGG	HIF-1 signaling pathway	1	12	1	0	0	12	40.72
ERBB2	ENSG00000141736	erb-b2 receptor tyrosine kinase 2	1110	7	TRUE	FALSE	FALSE	TRUE	TRUE	FALSE	FALSE	FALSE	FALSE	FALSE	TRUE	FALSE	Cell membrane	1	42	CHEMBL1201585	TRASTUZUMAB	TRUE	4	FALSE	KEGG	HIF-1 signaling pathway	1	12	1	0	0	12	40.72
ERBB2	ENSG00000141736	erb-b2 receptor tyrosine kinase 2	1110	7	TRUE	FALSE	FALSE	TRUE	TRUE	FALSE	FALSE	FALSE	FALSE	FALSE	TRUE	FALSE	Cell membrane	1	42	CHEMBL24828	VANDETANIB	TRUE	4	FALSE	KEGG	HIF-1 signaling pathway	1	12	1	0	0	12	40.72
ERBB2	ENSG00000141736	erb-b2 receptor tyrosine kinase 2	1110	7	TRUE	FALSE	FALSE	TRUE	TRUE	FALSE	FALSE	FALSE	FALSE	FALSE	TRUE	FALSE	Cell membrane	1	42	CHEMBL1173655	AFATINIB	TRUE	4	FALSE	KEGG	HIF-1 signaling pathway	1	12	1	0	0	12	40.72
ERBB2	ENSG00000141736	erb-b2 receptor tyrosine kinase 2	1110	7	TRUE	FALSE	FALSE	TRUE	TRUE	FALSE	FALSE	FALSE	FALSE	FALSE	TRUE	FALSE	Cell membrane	1	42	CHEMBL1201179	LAPATINIB DITOSYLATE	TRUE	4	FALSE	KEGG	HIF-1 signaling pathway	1	12	1	0	0	12	40.72
ERBB2	ENSG00000141736	erb-b2 receptor tyrosine kinase 2	1110	7	TRUE	FALSE	FALSE	TRUE	TRUE	FALSE	FALSE	FALSE	FALSE	FALSE	TRUE	FALSE	Cell membrane	1	42	CHEMBL24828	VANDETANIB	TRUE	4	FALSE	KEGG	HIF-1 signaling pathway	1	12	1	0	0	12	40.72
ERBB2	ENSG00000141736	erb-b2 receptor tyrosine kinase 2	1110	7	TRUE	FALSE	FALSE	TRUE	TRUE	FALSE	FALSE	FALSE	FALSE	FALSE	TRUE	FALSE	Cell membrane	1	42	CHEMBL1743082	TRASTUZUMAB EMTANSINE	TRUE	4	FALSE	KEGG	HIF-1 signaling pathway	1	12	1	0	0	12	40.72
ERBB2	ENSG00000141736	erb-b2 receptor tyrosine kinase 2	1110	7	TRUE	FALSE	FALSE	TRUE	TRUE	FALSE	FALSE	FALSE	FALSE	FALSE	TRUE	FALSE	Cell membrane	1	42	CHEMBL1173655	AFATINIB	TRUE	4	FALSE	KEGG	HIF-1 signaling pathway	1	12	1	0	0	12	40.72
ERBB2	ENSG00000141736	erb-b2 receptor tyrosine kinase 2	1110	7	TRUE	FALSE	FALSE	TRUE	TRUE	FALSE	FALSE	FALSE	FALSE	FALSE	TRUE	FALSE	Cell membrane	1	42	CHEMBL1201585	TRASTUZUMAB	TRUE	4	FALSE	KEGG	HIF-1 signaling pathway	1	12	1	0	0	12	40.72
ERBB2	ENSG00000141736	erb-b2 receptor tyrosine kinase 2	1110	7	TRUE	FALSE	FALSE	TRUE	TRUE	FALSE	FALSE	FALSE	FALSE	FALSE	TRUE	FALSE	Cell membrane	1	42	CHEMBL554	LAPATINIB	TRUE	4	FALSE	KEGG	HIF-1 signaling pathway	1	12	1	0	0	12	40.72
ERBB2	ENSG00000141736	erb-b2 receptor tyrosine kinase 2	1110	7	TRUE	FALSE	FALSE	TRUE	TRUE	FALSE	FALSE	FALSE	FALSE	FALSE	TRUE	FALSE	Cell membrane	1	42	CHEMBL554	LAPATINIB	TRUE	4	FALSE	KEGG	HIF-1 signaling pathway	1	12	1	0	0	12	40.72
ERBB2	ENSG00000141736	erb-b2 receptor tyrosine kinase 2	1110	7	TRUE	FALSE	FALSE	TRUE	TRUE	FALSE	FALSE	FALSE	FALSE	FALSE	TRUE	FALSE	Cell membrane	1	42	CHEMBL4297844	TRASTUZUMAB DERUXTECAN	TRUE	4	FALSE	KEGG	HIF-1 signaling pathway	1	12	1	0	0	12	40.72
ERBB2	ENSG00000141736	erb-b2 receptor tyrosine kinase 2	1110	7	TRUE	FALSE	FALSE	TRUE	TRUE	FALSE	FALSE	FALSE	FALSE	FALSE	TRUE	FALSE	Cell membrane	1	42	CHEMBL1201179	LAPATINIB DITOSYLATE	TRUE	4	FALSE	KEGG	HIF-1 signaling pathway	1	12	1	0	0	12	40.72
ERBB2	ENSG00000141736	erb-b2 receptor tyrosine kinase 2	1110	7	TRUE	FALSE	FALSE	TRUE	TRUE	FALSE	FALSE	FALSE	FALSE	FALSE	TRUE	FALSE	Cell membrane	1	42	CHEMBL2110732	DACOMITINIB	TRUE	4	FALSE	KEGG	HIF-1 signaling pathway	1	12	1	0	0	12	40.72
ERBB2	ENSG00000141736	erb-b2 receptor tyrosine kinase 2	1110	7	TRUE	FALSE	FALSE	TRUE	TRUE	FALSE	FALSE	FALSE	FALSE	FALSE	TRUE	FALSE	Cell membrane	1	42	CHEMBL554	LAPATINIB	TRUE	4	FALSE	KEGG	HIF-1 signaling pathway	1	12	1	0	0	12	40.72
ERBB2	ENSG00000141736	erb-b2 receptor tyrosine kinase 2	1110	7	TRUE	FALSE	FALSE	TRUE	TRUE	FALSE	FALSE	FALSE	FALSE	FALSE	TRUE	FALSE	Cell membrane	1	42	CHEMBL2007641	PERTUZUMAB	TRUE	4	FALSE	KEGG	HIF-1 signaling pathway	1	12	1	0	0	12	40.72
PIK3CA	ENSG00000121879	phosphatidylinositol-4,5-bisphosphate 3-kinase catalytic subunit alpha	900	5	TRUE	FALSE	FALSE	TRUE	FALSE	FALSE	FALSE	FALSE	FALSE	FALSE	FALSE	FALSE	Cytosol	2	32	CHEMBL2017974	BUPARLISIB	FALSE	3	FALSE	KEGG	HIF-1 signaling pathway	2	3	3	3	0	3	39.53
PIK3CA	ENSG00000121879	phosphatidylinositol-4,5-bisphosphate 3-kinase catalytic subunit alpha	900	5	TRUE	FALSE	FALSE	TRUE	FALSE	FALSE	FALSE	FALSE	FALSE	FALSE	FALSE	FALSE	Cytosol	2	32	CHEMBL2017974	BUPARLISIB	FALSE	3	FALSE	KEGG	HIF-1 signaling pathway	2	3	3	3	0	3	39.53
PIK3CA	ENSG00000121879	phosphatidylinositol-4,5-bisphosphate 3-kinase catalytic subunit alpha	900	5	TRUE	FALSE	FALSE	TRUE	FALSE	FALSE	FALSE	FALSE	FALSE	FALSE	FALSE	FALSE	Cytosol	2	32	CHEMBL2396661	ALPELISIB	TRUE	4	FALSE	KEGG	HIF-1 signaling pathway	2	3	3	3	0	3	39.53
PIK3CA	ENSG00000121879	phosphatidylinositol-4,5-bisphosphate 3-kinase catalytic subunit alpha	900	5	TRUE	FALSE	FALSE	TRUE	FALSE	FALSE	FALSE	FALSE	FALSE	FALSE	FALSE	FALSE	Cytosol	2	32	CHEMBL2396661	ALPELISIB	TRUE	4	FALSE	KEGG	HIF-1 signaling pathway	2	3	3	3	0	3	39.53
PIK3CA	ENSG00000121879	phosphatidylinositol-4,5-bisphosphate 3-kinase catalytic subunit alpha	900	5	TRUE	FALSE	FALSE	TRUE	FALSE	FALSE	FALSE	FALSE	FALSE	FALSE	FALSE	FALSE	Cytosol	2	32	CHEMBL592445	GEDATOLISIB	FALSE	2	FALSE	KEGG	HIF-1 signaling pathway	2	3	3	3	0	3	39.53
PIK3CA	ENSG00000121879	phosphatidylinositol-4,5-bisphosphate 3-kinase catalytic subunit alpha	900	5	TRUE	FALSE	FALSE	TRUE	FALSE	FALSE	FALSE	FALSE	FALSE	FALSE	FALSE	FALSE	Cytosol	2	32	CHEMBL3935857	SERABELISIB	FALSE	2	FALSE	Reactome	Cytokine Signaling in Immune system	2	3	3	3	0	3	39.53
PIK3CA	ENSG00000121879	phosphatidylinositol-4,5-bisphosphate 3-kinase catalytic subunit alpha	900	5	TRUE	FALSE	FALSE	TRUE	FALSE	FALSE	FALSE	FALSE	FALSE	FALSE	FALSE	FALSE	Cytosol	2	32	CHEMBL3813842	PAXALISIB	FALSE	2	FALSE	Reactome	Cytokine Signaling in Immune system	2	3	3	3	0	3	39.53
PIK3CA	ENSG00000121879	phosphatidylinositol-4,5-bisphosphate 3-kinase catalytic subunit alpha	900	5	TRUE	FALSE	FALSE	TRUE	FALSE	FALSE	FALSE	FALSE	FALSE	FALSE	FALSE	FALSE	Cytosol	2	32	CHEMBL3218576	COPANLISIB	TRUE	4	FALSE	KEGG	HIF-1 signaling pathway	2	3	3	3	0	3	39.53
PIK3CA	ENSG00000121879	phosphatidylinositol-4,5-bisphosphate 3-kinase catalytic subunit alpha	900	5	TRUE	FALSE	FALSE	TRUE	FALSE	FALSE	FALSE	FALSE	FALSE	FALSE	FALSE	FALSE	Cytosol	2	32	CHEMBL2396661	ALPELISIB	TRUE	4	FALSE	Reactome	Cytokine Signaling in Immune system	2	3	3	3	0	3	39.53
PIK3CA	ENSG00000121879	phosphatidylinositol-4,5-bisphosphate 3-kinase catalytic subunit alpha	900	5	TRUE	FALSE	FALSE	TRUE	FALSE	FALSE	FALSE	FALSE	FALSE	FALSE	FALSE	FALSE	Cytosol	2	32	CHEMBL2017974	BUPARLISIB	FALSE	3	FALSE	Reactome	Cytokine Signaling in Immune system	2	3	3	3	0	3	39.53
PIK3CA	ENSG00000121879	phosphatidylinositol-4,5-bisphosphate 3-kinase catalytic subunit alpha	900	5	TRUE	FALSE	FALSE	TRUE	FALSE	FALSE	FALSE	FALSE	FALSE	FALSE	FALSE	FALSE	Cytosol	2	32	CHEMBL2387080	TASELISIB	FALSE	3	FALSE	Reactome	Cytokine Signaling in Immune system	2	3	3	3	0	3	39.53
PIK3CA	ENSG00000121879	phosphatidylinositol-4,5-bisphosphate 3-kinase catalytic subunit alpha	900	5	TRUE	FALSE	FALSE	TRUE	FALSE	FALSE	FALSE	FALSE	FALSE	FALSE	FALSE	FALSE	Cytosol	2	32	CHEMBL2396661	ALPELISIB	TRUE	4	FALSE	KEGG	HIF-1 signaling pathway	2	3	3	3	0	3	39.53
PIK3CA	ENSG00000121879	phosphatidylinositol-4,5-bisphosphate 3-kinase catalytic subunit alpha	900	5	TRUE	FALSE	FALSE	TRUE	FALSE	FALSE	FALSE	FALSE	FALSE	FALSE	FALSE	FALSE	Cytosol	2	32	CHEMBL2387080	TASELISIB	FALSE	3	FALSE	KEGG	HIF-1 signaling pathway	2	3	3	3	0	3	39.53
PIK3CA	ENSG00000121879	phosphatidylinositol-4,5-bisphosphate 3-kinase catalytic subunit alpha	900	5	TRUE	FALSE	FALSE	TRUE	FALSE	FALSE	FALSE	FALSE	FALSE	FALSE	FALSE	FALSE	Cytosol	2	32	CHEMBL3935857	SERABELISIB	FALSE	2	FALSE	KEGG	HIF-1 signaling pathway	2	3	3	3	0	3	39.53
PIK3CA	ENSG00000121879	phosphatidylinositol-4,5-bisphosphate 3-kinase catalytic subunit alpha	900	5	TRUE	FALSE	FALSE	TRUE	FALSE	FALSE	FALSE	FALSE	FALSE	FALSE	FALSE	FALSE	Cytosol	2	32	CHEMBL2396661	ALPELISIB	TRUE	4	FALSE	KEGG	HIF-1 signaling pathway	2	3	3	3	0	3	39.53
PIK3CA	ENSG00000121879	phosphatidylinositol-4,5-bisphosphate 3-kinase catalytic subunit alpha	900	5	TRUE	FALSE	FALSE	TRUE	FALSE	FALSE	FALSE	FALSE	FALSE	FALSE	FALSE	FALSE	Cytosol	2	32	CHEMBL3545068	COPANLISIB HYDROCHLORIDE	TRUE	4	FALSE	Reactome	Cytokine Signaling in Immune system	2	3	3	3	0	3	39.53
PIK3CA	ENSG00000121879	phosphatidylinositol-4,5-bisphosphate 3-kinase catalytic subunit alpha	900	5	TRUE	FALSE	FALSE	TRUE	FALSE	FALSE	FALSE	FALSE	FALSE	FALSE	FALSE	FALSE	Cytosol	2	32	CHEMBL2396661	ALPELISIB	TRUE	4	FALSE	KEGG	HIF-1 signaling pathway	2	3	3	3	0	3	39.53
PIK3CA	ENSG00000121879	phosphatidylinositol-4,5-bisphosphate 3-kinase catalytic subunit alpha	900	5	TRUE	FALSE	FALSE	TRUE	FALSE	FALSE	FALSE	FALSE	FALSE	FALSE	FALSE	FALSE	Cytosol	2	32	CHEMBL2396661	ALPELISIB	TRUE	4	FALSE	Reactome	Cytokine Signaling in Immune system	2	3	3	3	0	3	39.53
PIK3CA	ENSG00000121879	phosphatidylinositol-4,5-bisphosphate 3-kinase catalytic subunit alpha	900	5	TRUE	FALSE	FALSE	TRUE	FALSE	FALSE	FALSE	FALSE	FALSE	FALSE	FALSE	FALSE	Cytosol	2	32	CHEMBL2396661	ALPELISIB	TRUE	4	FALSE	KEGG	HIF-1 signaling pathway	2	3	3	3	0	3	39.53
PIK3CA	ENSG00000121879	phosphatidylinositol-4,5-bisphosphate 3-kinase catalytic subunit alpha	900	5	TRUE	FALSE	FALSE	TRUE	FALSE	FALSE	FALSE	FALSE	FALSE	FALSE	FALSE	FALSE	Cytosol	2	32	CHEMBL3218576	COPANLISIB	TRUE	4	FALSE	KEGG	HIF-1 signaling pathway	2	3	3	3	0	3	39.53
PIK3CA	ENSG00000121879	phosphatidylinositol-4,5-bisphosphate 3-kinase catalytic subunit alpha	900	5	TRUE	FALSE	FALSE	TRUE	FALSE	FALSE	FALSE	FALSE	FALSE	FALSE	FALSE	FALSE	Cytosol	2	32	CHEMBL2017974	BUPARLISIB	FALSE	3	FALSE	KEGG	HIF-1 signaling pathway	2	3	3	3	0	3	39.53
PIK3CA	ENSG00000121879	phosphatidylinositol-4,5-bisphosphate 3-kinase catalytic subunit alpha	900	5	TRUE	FALSE	FALSE	TRUE	FALSE	FALSE	FALSE	FALSE	FALSE	FALSE	FALSE	FALSE	Cytosol	2	32	CHEMBL3218576	COPANLISIB	TRUE	4	FALSE	KEGG	HIF-1 signaling pathway	2	3	3	3	0	3	39.53
PIK3CA	ENSG00000121879	phosphatidylinositol-4,5-bisphosphate 3-kinase catalytic subunit alpha	900	5	TRUE	FALSE	FALSE	TRUE	FALSE	FALSE	FALSE	FALSE	FALSE	FALSE	FALSE	FALSE	Cytosol	2	32	CHEMBL2396661	ALPELISIB	TRUE	4	FALSE	KEGG	HIF-1 signaling pathway	2	3	3	3	0	3	39.53
PIK3CA	ENSG00000121879	phosphatidylinositol-4,5-bisphosphate 3-kinase catalytic subunit alpha	900	5	TRUE	FALSE	FALSE	TRUE	FALSE	FALSE	FALSE	FALSE	FALSE	FALSE	FALSE	FALSE	Cytosol	2	32	CHEMBL3545068	COPANLISIB HYDROCHLORIDE	TRUE	4	FALSE	KEGG	HIF-1 signaling pathway	2	3	3	3	0	3	39.53
PIK3CA	ENSG00000121879	phosphatidylinositol-4,5-bisphosphate 3-kinase catalytic subunit alpha	900	5	TRUE	FALSE	FALSE	TRUE	FALSE	FALSE	FALSE	FALSE	FALSE	FALSE	FALSE	FALSE	Cytosol	2	32	CHEMBL3218576	COPANLISIB	TRUE	4	FALSE	KEGG	HIF-1 signaling pathway	2	3	3	3	0	3	39.53
PIK3CA	ENSG00000121879	phosphatidylinositol-4,5-bisphosphate 3-kinase catalytic subunit alpha	900	5	TRUE	FALSE	FALSE	TRUE	FALSE	FALSE	FALSE	FALSE	FALSE	FALSE	FALSE	FALSE	Cytosol	2	32	CHEMBL3813842	PAXALISIB	FALSE	2	FALSE	KEGG	HIF-1 signaling pathway	2	3	3	3	0	3	39.53
PIK3CA	ENSG00000121879	phosphatidylinositol-4,5-bisphosphate 3-kinase catalytic subunit alpha	900	5	TRUE	FALSE	FALSE	TRUE	FALSE	FALSE	FALSE	FALSE	FALSE	FALSE	FALSE	FALSE	Cytosol	2	32	CHEMBL2017974	BUPARLISIB	FALSE	3	FALSE	Reactome	Cytokine Signaling in Immune system	2	3	3	3	0	3	39.53
PIK3CA	ENSG00000121879	phosphatidylinositol-4,5-bisphosphate 3-kinase catalytic subunit alpha	900	5	TRUE	FALSE	FALSE	TRUE	FALSE	FALSE	FALSE	FALSE	FALSE	FALSE	FALSE	FALSE	Cytosol	2	32	CHEMBL3218576	COPANLISIB	TRUE	4	FALSE	KEGG	HIF-1 signaling pathway	2	3	3	3	0	3	39.53
PIK3CA	ENSG00000121879	phosphatidylinositol-4,5-bisphosphate 3-kinase catalytic subunit alpha	900	5	TRUE	FALSE	FALSE	TRUE	FALSE	FALSE	FALSE	FALSE	FALSE	FALSE	FALSE	FALSE	Cytosol	2	32	CHEMBL2396661	ALPELISIB	TRUE	4	FALSE	KEGG	HIF-1 signaling pathway	2	3	3	3	0	3	39.53
PIK3CA	ENSG00000121879	phosphatidylinositol-4,5-bisphosphate 3-kinase catalytic subunit alpha	900	5	TRUE	FALSE	FALSE	TRUE	FALSE	FALSE	FALSE	FALSE	FALSE	FALSE	FALSE	FALSE	Cytosol	2	32	CHEMBL3545068	COPANLISIB HYDROCHLORIDE	TRUE	4	FALSE	KEGG	HIF-1 signaling pathway	2	3	3	3	0	3	39.53
PIK3CA	ENSG00000121879	phosphatidylinositol-4,5-bisphosphate 3-kinase catalytic subunit alpha	900	5	TRUE	FALSE	FALSE	TRUE	FALSE	FALSE	FALSE	FALSE	FALSE	FALSE	FALSE	FALSE	Cytosol	2	32	CHEMBL3218576	COPANLISIB	TRUE	4	FALSE	Reactome	Cytokine Signaling in Immune system	2	3	3	3	0	3	39.53
PIK3CA	ENSG00000121879	phosphatidylinositol-4,5-bisphosphate 3-kinase catalytic subunit alpha	900	5	TRUE	FALSE	FALSE	TRUE	FALSE	FALSE	FALSE	FALSE	FALSE	FALSE	FALSE	FALSE	Cytosol	2	32	CHEMBL592445	GEDATOLISIB	FALSE	2	FALSE	Reactome	Cytokine Signaling in Immune system	2	3	3	3	0	3	39.53
PIK3CA	ENSG00000121879	phosphatidylinositol-4,5-bisphosphate 3-kinase catalytic subunit alpha	900	5	TRUE	FALSE	FALSE	TRUE	FALSE	FALSE	FALSE	FALSE	FALSE	FALSE	FALSE	FALSE	Cytosol	2	32	CHEMBL3218576	COPANLISIB	TRUE	4	FALSE	Reactome	Cytokine Signaling in Immune system	2	3	3	3	0	3	39.53
PIK3CA	ENSG00000121879	phosphatidylinositol-4,5-bisphosphate 3-kinase catalytic subunit alpha	900	5	TRUE	FALSE	FALSE	TRUE	FALSE	FALSE	FALSE	FALSE	FALSE	FALSE	FALSE	FALSE	Cytosol	2	32	CHEMBL1879463	DACTOLISIB	FALSE	3	FALSE	KEGG	HIF-1 signaling pathway	2	3	3	3	0	3	39.53
PIK3CA	ENSG00000121879	phosphatidylinositol-4,5-bisphosphate 3-kinase catalytic subunit alpha	900	5	TRUE	FALSE	FALSE	TRUE	FALSE	FALSE	FALSE	FALSE	FALSE	FALSE	FALSE	FALSE	Cytosol	2	32	CHEMBL2017974	BUPARLISIB	FALSE	3	FALSE	KEGG	HIF-1 signaling pathway	2	3	3	3	0	3	39.53
PIK3CA	ENSG00000121879	phosphatidylinositol-4,5-bisphosphate 3-kinase catalytic subunit alpha	900	5	TRUE	FALSE	FALSE	TRUE	FALSE	FALSE	FALSE	FALSE	FALSE	FALSE	FALSE	FALSE	Cytosol	2	32	CHEMBL2396661	ALPELISIB	TRUE	4	FALSE	KEGG	HIF-1 signaling pathway	2	3	3	3	0	3	39.53
PIK3CA	ENSG00000121879	phosphatidylinositol-4,5-bisphosphate 3-kinase catalytic subunit alpha	900	5	TRUE	FALSE	FALSE	TRUE	FALSE	FALSE	FALSE	FALSE	FALSE	FALSE	FALSE	FALSE	Cytosol	2	32	CHEMBL2396661	ALPELISIB	TRUE	4	FALSE	Reactome	Cytokine Signaling in Immune system	2	3	3	3	0	3	39.53
PIK3CA	ENSG00000121879	phosphatidylinositol-4,5-bisphosphate 3-kinase catalytic subunit alpha	900	5	TRUE	FALSE	FALSE	TRUE	FALSE	FALSE	FALSE	FALSE	FALSE	FALSE	FALSE	FALSE	Cytosol	2	32	CHEMBL3218576	COPANLISIB	TRUE	4	FALSE	Reactome	Cytokine Signaling in Immune system	2	3	3	3	0	3	39.53
PIK3CA	ENSG00000121879	phosphatidylinositol-4,5-bisphosphate 3-kinase catalytic subunit alpha	900	5	TRUE	FALSE	FALSE	TRUE	FALSE	FALSE	FALSE	FALSE	FALSE	FALSE	FALSE	FALSE	Cytosol	2	32	CHEMBL2396661	ALPELISIB	TRUE	4	FALSE	Reactome	Cytokine Signaling in Immune system	2	3	3	3	0	3	39.53
PIK3CA	ENSG00000121879	phosphatidylinositol-4,5-bisphosphate 3-kinase catalytic subunit alpha	900	5	TRUE	FALSE	FALSE	TRUE	FALSE	FALSE	FALSE	FALSE	FALSE	FALSE	FALSE	FALSE	Cytosol	2	32	CHEMBL2396661	ALPELISIB	TRUE	4	FALSE	Reactome	Cytokine Signaling in Immune system	2	3	3	3	0	3	39.53
PIK3CA	ENSG00000121879	phosphatidylinositol-4,5-bisphosphate 3-kinase catalytic subunit alpha	900	5	TRUE	FALSE	FALSE	TRUE	FALSE	FALSE	FALSE	FALSE	FALSE	FALSE	FALSE	FALSE	Cytosol	2	32	CHEMBL3218576	COPANLISIB	TRUE	4	FALSE	Reactome	Cytokine Signaling in Immune system	2	3	3	3	0	3	39.53
PIK3CA	ENSG00000121879	phosphatidylinositol-4,5-bisphosphate 3-kinase catalytic subunit alpha	900	5	TRUE	FALSE	FALSE	TRUE	FALSE	FALSE	FALSE	FALSE	FALSE	FALSE	FALSE	FALSE	Cytosol	2	32	CHEMBL2396661	ALPELISIB	TRUE	4	FALSE	Reactome	Cytokine Signaling in Immune system	2	3	3	3	0	3	39.53
PIK3CA	ENSG00000121879	phosphatidylinositol-4,5-bisphosphate 3-kinase catalytic subunit alpha	900	5	TRUE	FALSE	FALSE	TRUE	FALSE	FALSE	FALSE	FALSE	FALSE	FALSE	FALSE	FALSE	Cytosol	2	32	CHEMBL3545068	COPANLISIB HYDROCHLORIDE	TRUE	4	FALSE	Reactome	Cytokine Signaling in Immune system	2	3	3	3	0	3	39.53
PIK3CA	ENSG00000121879	phosphatidylinositol-4,5-bisphosphate 3-kinase catalytic subunit alpha	900	5	TRUE	FALSE	FALSE	TRUE	FALSE	FALSE	FALSE	FALSE	FALSE	FALSE	FALSE	FALSE	Cytosol	2	32	CHEMBL2396661	ALPELISIB	TRUE	4	FALSE	Reactome	Cytokine Signaling in Immune system	2	3	3	3	0	3	39.53
PIK3CA	ENSG00000121879	phosphatidylinositol-4,5-bisphosphate 3-kinase catalytic subunit alpha	900	5	TRUE	FALSE	FALSE	TRUE	FALSE	FALSE	FALSE	FALSE	FALSE	FALSE	FALSE	FALSE	Cytosol	2	32	CHEMBL2396661	ALPELISIB	TRUE	4	FALSE	Reactome	Cytokine Signaling in Immune system	2	3	3	3	0	3	39.53
PIK3CA	ENSG00000121879	phosphatidylinositol-4,5-bisphosphate 3-kinase catalytic subunit alpha	900	5	TRUE	FALSE	FALSE	TRUE	FALSE	FALSE	FALSE	FALSE	FALSE	FALSE	FALSE	FALSE	Cytosol	2	32	CHEMBL2017974	BUPARLISIB	FALSE	3	FALSE	Reactome	Cytokine Signaling in Immune system	2	3	3	3	0	3	39.53
PIK3CA	ENSG00000121879	phosphatidylinositol-4,5-bisphosphate 3-kinase catalytic subunit alpha	900	5	TRUE	FALSE	FALSE	TRUE	FALSE	FALSE	FALSE	FALSE	FALSE	FALSE	FALSE	FALSE	Cytosol	2	32	CHEMBL3218576	COPANLISIB	TRUE	4	FALSE	Reactome	Cytokine Signaling in Immune system	2	3	3	3	0	3	39.53
PIK3CA	ENSG00000121879	phosphatidylinositol-4,5-bisphosphate 3-kinase catalytic subunit alpha	900	5	TRUE	FALSE	FALSE	TRUE	FALSE	FALSE	FALSE	FALSE	FALSE	FALSE	FALSE	FALSE	Cytosol	2	32	CHEMBL2017974	BUPARLISIB	FALSE	3	FALSE	Reactome	Cytokine Signaling in Immune system	2	3	3	3	0	3	39.53
PIK3CA	ENSG00000121879	phosphatidylinositol-4,5-bisphosphate 3-kinase catalytic subunit alpha	900	5	TRUE	FALSE	FALSE	TRUE	FALSE	FALSE	FALSE	FALSE	FALSE	FALSE	FALSE	FALSE	Cytosol	2	32	CHEMBL1879463	DACTOLISIB	FALSE	3	FALSE	Reactome	Cytokine Signaling in Immune system	2	3	3	3	0	3	39.53
PIK3CA	ENSG00000121879	phosphatidylinositol-4,5-bisphosphate 3-kinase catalytic subunit alpha	900	5	TRUE	FALSE	FALSE	TRUE	FALSE	FALSE	FALSE	FALSE	FALSE	FALSE	FALSE	FALSE	Cytosol	2	32	CHEMBL2396661	ALPELISIB	TRUE	4	FALSE	Reactome	Cytokine Signaling in Immune system	2	3	3	3	0	3	39.53
PIK3CB	ENSG00000051382	phosphatidylinositol-4,5-bisphosphate 3-kinase catalytic subunit beta	486	3	FALSE	TRUE	FALSE	TRUE	FALSE	FALSE	FALSE	FALSE	FALSE	FALSE	FALSE	FALSE	Cytoplasm	0	29	CHEMBL2017974	BUPARLISIB	FALSE	3	FALSE	KEGG	HIF-1 signaling pathway	2	0	3	4	0	0	39.36
PIK3CB	ENSG00000051382	phosphatidylinositol-4,5-bisphosphate 3-kinase catalytic subunit beta	486	3	FALSE	TRUE	FALSE	TRUE	FALSE	FALSE	FALSE	FALSE	FALSE	FALSE	FALSE	FALSE	Cytoplasm	0	29	CHEMBL1879463	DACTOLISIB	FALSE	3	FALSE	KEGG	HIF-1 signaling pathway	2	0	3	4	0	0	39.36
PIK3CB	ENSG00000051382	phosphatidylinositol-4,5-bisphosphate 3-kinase catalytic subunit beta	486	3	FALSE	TRUE	FALSE	TRUE	FALSE	FALSE	FALSE	FALSE	FALSE	FALSE	FALSE	FALSE	Cytoplasm	0	29	CHEMBL2387080	TASELISIB	FALSE	3	FALSE	Reactome	Cytokine Signaling in Immune system	2	0	3	4	0	0	39.36
PIK3CB	ENSG00000051382	phosphatidylinositol-4,5-bisphosphate 3-kinase catalytic subunit beta	486	3	FALSE	TRUE	FALSE	TRUE	FALSE	FALSE	FALSE	FALSE	FALSE	FALSE	FALSE	FALSE	Cytoplasm	0	29	CHEMBL4297181	SAMOTOLISIB	FALSE	2	FALSE	Reactome	Cytokine Signaling in Immune system	2	0	3	4	0	0	39.36
PIK3CB	ENSG00000051382	phosphatidylinositol-4,5-bisphosphate 3-kinase catalytic subunit beta	486	3	FALSE	TRUE	FALSE	TRUE	FALSE	FALSE	FALSE	FALSE	FALSE	FALSE	FALSE	FALSE	Cytoplasm	0	29	CHEMBL1234354	PF-04691502	FALSE	2	FALSE	Reactome	Cytokine Signaling in Immune system	2	0	3	4	0	0	39.36
PIK3CB	ENSG00000051382	phosphatidylinositol-4,5-bisphosphate 3-kinase catalytic subunit beta	486	3	FALSE	TRUE	FALSE	TRUE	FALSE	FALSE	FALSE	FALSE	FALSE	FALSE	FALSE	FALSE	Cytoplasm	0	29	CHEMBL2017974	BUPARLISIB	FALSE	3	FALSE	KEGG	HIF-1 signaling pathway	2	0	3	4	0	0	39.36
PIK3CB	ENSG00000051382	phosphatidylinositol-4,5-bisphosphate 3-kinase catalytic subunit beta	486	3	FALSE	TRUE	FALSE	TRUE	FALSE	FALSE	FALSE	FALSE	FALSE	FALSE	FALSE	FALSE	Cytoplasm	0	29	CHEMBL1879463	DACTOLISIB	FALSE	3	FALSE	Reactome	Cytokine Signaling in Immune system	2	0	3	4	0	0	39.36
PIK3CB	ENSG00000051382	phosphatidylinositol-4,5-bisphosphate 3-kinase catalytic subunit beta	486	3	FALSE	TRUE	FALSE	TRUE	FALSE	FALSE	FALSE	FALSE	FALSE	FALSE	FALSE	FALSE	Cytoplasm	0	29	CHEMBL2017974	BUPARLISIB	FALSE	3	FALSE	Reactome	Cytokine Signaling in Immune system	2	0	3	4	0	0	39.36
PIK3CB	ENSG00000051382	phosphatidylinositol-4,5-bisphosphate 3-kinase catalytic subunit beta	486	3	FALSE	TRUE	FALSE	TRUE	FALSE	FALSE	FALSE	FALSE	FALSE	FALSE	FALSE	FALSE	Cytoplasm	0	29	CHEMBL2017974	BUPARLISIB	FALSE	3	FALSE	Reactome	Cytokine Signaling in Immune system	2	0	3	4	0	0	39.36
PIK3CB	ENSG00000051382	phosphatidylinositol-4,5-bisphosphate 3-kinase catalytic subunit beta	486	3	FALSE	TRUE	FALSE	TRUE	FALSE	FALSE	FALSE	FALSE	FALSE	FALSE	FALSE	FALSE	Cytoplasm	0	29	CHEMBL2017974	BUPARLISIB	FALSE	3	FALSE	KEGG	HIF-1 signaling pathway	2	0	3	4	0	0	39.36
PIK3CB	ENSG00000051382	phosphatidylinositol-4,5-bisphosphate 3-kinase catalytic subunit beta	486	3	FALSE	TRUE	FALSE	TRUE	FALSE	FALSE	FALSE	FALSE	FALSE	FALSE	FALSE	FALSE	Cytoplasm	0	29	CHEMBL2017974	BUPARLISIB	FALSE	3	FALSE	Reactome	Cytokine Signaling in Immune system	2	0	3	4	0	0	39.36
PIK3CB	ENSG00000051382	phosphatidylinositol-4,5-bisphosphate 3-kinase catalytic subunit beta	486	3	FALSE	TRUE	FALSE	TRUE	FALSE	FALSE	FALSE	FALSE	FALSE	FALSE	FALSE	FALSE	Cytoplasm	0	29	CHEMBL592445	GEDATOLISIB	FALSE	2	FALSE	KEGG	HIF-1 signaling pathway	2	0	3	4	0	0	39.36
PIK3CB	ENSG00000051382	phosphatidylinositol-4,5-bisphosphate 3-kinase catalytic subunit beta	486	3	FALSE	TRUE	FALSE	TRUE	FALSE	FALSE	FALSE	FALSE	FALSE	FALSE	FALSE	FALSE	Cytoplasm	0	29	CHEMBL2017974	BUPARLISIB	FALSE	3	FALSE	KEGG	HIF-1 signaling pathway	2	0	3	4	0	0	39.36
PIK3CB	ENSG00000051382	phosphatidylinositol-4,5-bisphosphate 3-kinase catalytic subunit beta	486	3	FALSE	TRUE	FALSE	TRUE	FALSE	FALSE	FALSE	FALSE	FALSE	FALSE	FALSE	FALSE	Cytoplasm	0	29	CHEMBL1879463	DACTOLISIB	FALSE	3	FALSE	KEGG	HIF-1 signaling pathway	2	0	3	4	0	0	39.36
PIK3CB	ENSG00000051382	phosphatidylinositol-4,5-bisphosphate 3-kinase catalytic subunit beta	486	3	FALSE	TRUE	FALSE	TRUE	FALSE	FALSE	FALSE	FALSE	FALSE	FALSE	FALSE	FALSE	Cytoplasm	0	29	CHEMBL2387080	TASELISIB	FALSE	3	FALSE	KEGG	HIF-1 signaling pathway	2	0	3	4	0	0	39.36
PIK3CB	ENSG00000051382	phosphatidylinositol-4,5-bisphosphate 3-kinase catalytic subunit beta	486	3	FALSE	TRUE	FALSE	TRUE	FALSE	FALSE	FALSE	FALSE	FALSE	FALSE	FALSE	FALSE	Cytoplasm	0	29	CHEMBL2387080	TASELISIB	FALSE	3	FALSE	KEGG	HIF-1 signaling pathway	2	0	3	4	0	0	39.36
PIK3CB	ENSG00000051382	phosphatidylinositol-4,5-bisphosphate 3-kinase catalytic subunit beta	486	3	FALSE	TRUE	FALSE	TRUE	FALSE	FALSE	FALSE	FALSE	FALSE	FALSE	FALSE	FALSE	Cytoplasm	0	29	CHEMBL592445	GEDATOLISIB	FALSE	2	FALSE	Reactome	Cytokine Signaling in Immune system	2	0	3	4	0	0	39.36
PIK3CB	ENSG00000051382	phosphatidylinositol-4,5-bisphosphate 3-kinase catalytic subunit beta	486	3	FALSE	TRUE	FALSE	TRUE	FALSE	FALSE	FALSE	FALSE	FALSE	FALSE	FALSE	FALSE	Cytoplasm	0	29	CHEMBL1234354	PF-04691502	FALSE	2	FALSE	KEGG	HIF-1 signaling pathway	2	0	3	4	0	0	39.36
PIK3CB	ENSG00000051382	phosphatidylinositol-4,5-bisphosphate 3-kinase catalytic subunit beta	486	3	FALSE	TRUE	FALSE	TRUE	FALSE	FALSE	FALSE	FALSE	FALSE	FALSE	FALSE	FALSE	Cytoplasm	0	29	CHEMBL592445	GEDATOLISIB	FALSE	2	FALSE	Reactome	Cytokine Signaling in Immune system	2	0	3	4	0	0	39.36
PIK3CB	ENSG00000051382	phosphatidylinositol-4,5-bisphosphate 3-kinase catalytic subunit beta	486	3	FALSE	TRUE	FALSE	TRUE	FALSE	FALSE	FALSE	FALSE	FALSE	FALSE	FALSE	FALSE	Cytoplasm	0	29	CHEMBL1879463	DACTOLISIB	FALSE	3	FALSE	Reactome	Cytokine Signaling in Immune system	2	0	3	4	0	0	39.36
PIK3CB	ENSG00000051382	phosphatidylinositol-4,5-bisphosphate 3-kinase catalytic subunit beta	486	3	FALSE	TRUE	FALSE	TRUE	FALSE	FALSE	FALSE	FALSE	FALSE	FALSE	FALSE	FALSE	Cytoplasm	0	29	CHEMBL2017974	BUPARLISIB	FALSE	3	FALSE	KEGG	HIF-1 signaling pathway	2	0	3	4	0	0	39.36
PIK3CB	ENSG00000051382	phosphatidylinositol-4,5-bisphosphate 3-kinase catalytic subunit beta	486	3	FALSE	TRUE	FALSE	TRUE	FALSE	FALSE	FALSE	FALSE	FALSE	FALSE	FALSE	FALSE	Cytoplasm	0	29	CHEMBL3813842	PAXALISIB	FALSE	2	FALSE	KEGG	HIF-1 signaling pathway	2	0	3	4	0	0	39.36
PIK3CB	ENSG00000051382	phosphatidylinositol-4,5-bisphosphate 3-kinase catalytic subunit beta	486	3	FALSE	TRUE	FALSE	TRUE	FALSE	FALSE	FALSE	FALSE	FALSE	FALSE	FALSE	FALSE	Cytoplasm	0	29	CHEMBL1879463	DACTOLISIB	FALSE	3	FALSE	Reactome	Cytokine Signaling in Immune system	2	0	3	4	0	0	39.36
PIK3CB	ENSG00000051382	phosphatidylinositol-4,5-bisphosphate 3-kinase catalytic subunit beta	486	3	FALSE	TRUE	FALSE	TRUE	FALSE	FALSE	FALSE	FALSE	FALSE	FALSE	FALSE	FALSE	Cytoplasm	0	29	CHEMBL2017974	BUPARLISIB	FALSE	3	FALSE	KEGG	HIF-1 signaling pathway	2	0	3	4	0	0	39.36
PIK3CB	ENSG00000051382	phosphatidylinositol-4,5-bisphosphate 3-kinase catalytic subunit beta	486	3	FALSE	TRUE	FALSE	TRUE	FALSE	FALSE	FALSE	FALSE	FALSE	FALSE	FALSE	FALSE	Cytoplasm	0	29	CHEMBL2017974	BUPARLISIB	FALSE	3	FALSE	Reactome	Cytokine Signaling in Immune system	2	0	3	4	0	0	39.36
PIK3CB	ENSG00000051382	phosphatidylinositol-4,5-bisphosphate 3-kinase catalytic subunit beta	486	3	FALSE	TRUE	FALSE	TRUE	FALSE	FALSE	FALSE	FALSE	FALSE	FALSE	FALSE	FALSE	Cytoplasm	0	29	CHEMBL2017974	BUPARLISIB	FALSE	3	FALSE	Reactome	Cytokine Signaling in Immune system	2	0	3	4	0	0	39.36
PIK3CB	ENSG00000051382	phosphatidylinositol-4,5-bisphosphate 3-kinase catalytic subunit beta	486	3	FALSE	TRUE	FALSE	TRUE	FALSE	FALSE	FALSE	FALSE	FALSE	FALSE	FALSE	FALSE	Cytoplasm	0	29	CHEMBL2017974	BUPARLISIB	FALSE	3	FALSE	KEGG	HIF-1 signaling pathway	2	0	3	4	0	0	39.36
PIK3CB	ENSG00000051382	phosphatidylinositol-4,5-bisphosphate 3-kinase catalytic subunit beta	486	3	FALSE	TRUE	FALSE	TRUE	FALSE	FALSE	FALSE	FALSE	FALSE	FALSE	FALSE	FALSE	Cytoplasm	0	29	CHEMBL3813842	PAXALISIB	FALSE	2	FALSE	Reactome	Cytokine Signaling in Immune system	2	0	3	4	0	0	39.36
PIK3CB	ENSG00000051382	phosphatidylinositol-4,5-bisphosphate 3-kinase catalytic subunit beta	486	3	FALSE	TRUE	FALSE	TRUE	FALSE	FALSE	FALSE	FALSE	FALSE	FALSE	FALSE	FALSE	Cytoplasm	0	29	CHEMBL2017974	BUPARLISIB	FALSE	3	FALSE	Reactome	Cytokine Signaling in Immune system	2	0	3	4	0	0	39.36
PIK3CB	ENSG00000051382	phosphatidylinositol-4,5-bisphosphate 3-kinase catalytic subunit beta	486	3	FALSE	TRUE	FALSE	TRUE	FALSE	FALSE	FALSE	FALSE	FALSE	FALSE	FALSE	FALSE	Cytoplasm	0	29	CHEMBL1879463	DACTOLISIB	FALSE	3	FALSE	KEGG	HIF-1 signaling pathway	2	0	3	4	0	0	39.36
PIK3CB	ENSG00000051382	phosphatidylinositol-4,5-bisphosphate 3-kinase catalytic subunit beta	486	3	FALSE	TRUE	FALSE	TRUE	FALSE	FALSE	FALSE	FALSE	FALSE	FALSE	FALSE	FALSE	Cytoplasm	0	29	CHEMBL2387080	TASELISIB	FALSE	3	FALSE	Reactome	Cytokine Signaling in Immune system	2	0	3	4	0	0	39.36
PIK3CB	ENSG00000051382	phosphatidylinositol-4,5-bisphosphate 3-kinase catalytic subunit beta	486	3	FALSE	TRUE	FALSE	TRUE	FALSE	FALSE	FALSE	FALSE	FALSE	FALSE	FALSE	FALSE	Cytoplasm	0	29	CHEMBL2017974	BUPARLISIB	FALSE	3	FALSE	Reactome	Cytokine Signaling in Immune system	2	0	3	4	0	0	39.36
PIK3CB	ENSG00000051382	phosphatidylinositol-4,5-bisphosphate 3-kinase catalytic subunit beta	486	3	FALSE	TRUE	FALSE	TRUE	FALSE	FALSE	FALSE	FALSE	FALSE	FALSE	FALSE	FALSE	Cytoplasm	0	29	CHEMBL1879463	DACTOLISIB	FALSE	3	FALSE	KEGG	HIF-1 signaling pathway	2	0	3	4	0	0	39.36
PIK3CB	ENSG00000051382	phosphatidylinositol-4,5-bisphosphate 3-kinase catalytic subunit beta	486	3	FALSE	TRUE	FALSE	TRUE	FALSE	FALSE	FALSE	FALSE	FALSE	FALSE	FALSE	FALSE	Cytoplasm	0	29	CHEMBL4297181	SAMOTOLISIB	FALSE	2	FALSE	KEGG	HIF-1 signaling pathway	2	0	3	4	0	0	39.36
PIK3CB	ENSG00000051382	phosphatidylinositol-4,5-bisphosphate 3-kinase catalytic subunit beta	486	3	FALSE	TRUE	FALSE	TRUE	FALSE	FALSE	FALSE	FALSE	FALSE	FALSE	FALSE	FALSE	Cytoplasm	0	29	CHEMBL2017974	BUPARLISIB	FALSE	3	FALSE	KEGG	HIF-1 signaling pathway	2	0	3	4	0	0	39.36
PIK3CB	ENSG00000051382	phosphatidylinositol-4,5-bisphosphate 3-kinase catalytic subunit beta	486	3	FALSE	TRUE	FALSE	TRUE	FALSE	FALSE	FALSE	FALSE	FALSE	FALSE	FALSE	FALSE	Cytoplasm	0	29	CHEMBL2017974	BUPARLISIB	FALSE	3	FALSE	Reactome	Cytokine Signaling in Immune system	2	0	3	4	0	0	39.36
PIK3CB	ENSG00000051382	phosphatidylinositol-4,5-bisphosphate 3-kinase catalytic subunit beta	486	3	FALSE	TRUE	FALSE	TRUE	FALSE	FALSE	FALSE	FALSE	FALSE	FALSE	FALSE	FALSE	Cytoplasm	0	29	CHEMBL592445	GEDATOLISIB	FALSE	2	FALSE	KEGG	HIF-1 signaling pathway	2	0	3	4	0	0	39.36
PIK3CB	ENSG00000051382	phosphatidylinositol-4,5-bisphosphate 3-kinase catalytic subunit beta	486	3	FALSE	TRUE	FALSE	TRUE	FALSE	FALSE	FALSE	FALSE	FALSE	FALSE	FALSE	FALSE	Cytoplasm	0	29	CHEMBL2017974	BUPARLISIB	FALSE	3	FALSE	Reactome	Cytokine Signaling in Immune system	2	0	3	4	0	0	39.36
PIK3CB	ENSG00000051382	phosphatidylinositol-4,5-bisphosphate 3-kinase catalytic subunit beta	486	3	FALSE	TRUE	FALSE	TRUE	FALSE	FALSE	FALSE	FALSE	FALSE	FALSE	FALSE	FALSE	Cytoplasm	0	29	CHEMBL1879463	DACTOLISIB	FALSE	3	FALSE	Reactome	Cytokine Signaling in Immune system	2	0	3	4	0	0	39.36
PIK3CB	ENSG00000051382	phosphatidylinositol-4,5-bisphosphate 3-kinase catalytic subunit beta	486	3	FALSE	TRUE	FALSE	TRUE	FALSE	FALSE	FALSE	FALSE	FALSE	FALSE	FALSE	FALSE	Cytoplasm	0	29	CHEMBL2017974	BUPARLISIB	FALSE	3	FALSE	KEGG	HIF-1 signaling pathway	2	0	3	4	0	0	39.36
PIK3CB	ENSG00000051382	phosphatidylinositol-4,5-bisphosphate 3-kinase catalytic subunit beta	486	3	FALSE	TRUE	FALSE	TRUE	FALSE	FALSE	FALSE	FALSE	FALSE	FALSE	FALSE	FALSE	Cytoplasm	0	29	CHEMBL3813842	PAXALISIB	FALSE	2	FALSE	Reactome	Cytokine Signaling in Immune system	2	0	3	4	0	0	39.36
PIK3CB	ENSG00000051382	phosphatidylinositol-4,5-bisphosphate 3-kinase catalytic subunit beta	486	3	FALSE	TRUE	FALSE	TRUE	FALSE	FALSE	FALSE	FALSE	FALSE	FALSE	FALSE	FALSE	Cytoplasm	0	29	CHEMBL1879463	DACTOLISIB	FALSE	3	FALSE	KEGG	HIF-1 signaling pathway	2	0	3	4	0	0	39.36
PIK3CB	ENSG00000051382	phosphatidylinositol-4,5-bisphosphate 3-kinase catalytic subunit beta	486	3	FALSE	TRUE	FALSE	TRUE	FALSE	FALSE	FALSE	FALSE	FALSE	FALSE	FALSE	FALSE	Cytoplasm	0	29	CHEMBL2017974	BUPARLISIB	FALSE	3	FALSE	Reactome	Cytokine Signaling in Immune system	2	0	3	4	0	0	39.36
PIK3CB	ENSG00000051382	phosphatidylinositol-4,5-bisphosphate 3-kinase catalytic subunit beta	486	3	FALSE	TRUE	FALSE	TRUE	FALSE	FALSE	FALSE	FALSE	FALSE	FALSE	FALSE	FALSE	Cytoplasm	0	29	CHEMBL2017974	BUPARLISIB	FALSE	3	FALSE	KEGG	HIF-1 signaling pathway	2	0	3	4	0	0	39.36
PIK3CB	ENSG00000051382	phosphatidylinositol-4,5-bisphosphate 3-kinase catalytic subunit beta	486	3	FALSE	TRUE	FALSE	TRUE	FALSE	FALSE	FALSE	FALSE	FALSE	FALSE	FALSE	FALSE	Cytoplasm	0	29	CHEMBL2017974	BUPARLISIB	FALSE	3	FALSE	KEGG	HIF-1 signaling pathway	2	0	3	4	0	0	39.36
PIK3CB	ENSG00000051382	phosphatidylinositol-4,5-bisphosphate 3-kinase catalytic subunit beta	486	3	FALSE	TRUE	FALSE	TRUE	FALSE	FALSE	FALSE	FALSE	FALSE	FALSE	FALSE	FALSE	Cytoplasm	0	29	CHEMBL3813842	PAXALISIB	FALSE	2	FALSE	KEGG	HIF-1 signaling pathway	2	0	3	4	0	0	39.36
PIK3CB	ENSG00000051382	phosphatidylinositol-4,5-bisphosphate 3-kinase catalytic subunit beta	486	3	FALSE	TRUE	FALSE	TRUE	FALSE	FALSE	FALSE	FALSE	FALSE	FALSE	FALSE	FALSE	Cytoplasm	0	29	CHEMBL2017974	BUPARLISIB	FALSE	3	FALSE	Reactome	Cytokine Signaling in Immune system	2	0	3	4	0	0	39.36
PIK3CB	ENSG00000051382	phosphatidylinositol-4,5-bisphosphate 3-kinase catalytic subunit beta	486	3	FALSE	TRUE	FALSE	TRUE	FALSE	FALSE	FALSE	FALSE	FALSE	FALSE	FALSE	FALSE	Cytoplasm	0	29	CHEMBL1879463	DACTOLISIB	FALSE	3	FALSE	Reactome	Cytokine Signaling in Immune system	2	0	3	4	0	0	39.36
PIK3CB	ENSG00000051382	phosphatidylinositol-4,5-bisphosphate 3-kinase catalytic subunit beta	486	3	FALSE	TRUE	FALSE	TRUE	FALSE	FALSE	FALSE	FALSE	FALSE	FALSE	FALSE	FALSE	Cytoplasm	0	29	CHEMBL1879463	DACTOLISIB	FALSE	3	FALSE	Reactome	Cytokine Signaling in Immune system	2	0	3	4	0	0	39.36
PIK3CB	ENSG00000051382	phosphatidylinositol-4,5-bisphosphate 3-kinase catalytic subunit beta	486	3	FALSE	TRUE	FALSE	TRUE	FALSE	FALSE	FALSE	FALSE	FALSE	FALSE	FALSE	FALSE	Cytoplasm	0	29	CHEMBL1879463	DACTOLISIB	FALSE	3	FALSE	KEGG	HIF-1 signaling pathway	2	0	3	4	0	0	39.36
AURKA	ENSG00000087586	aurora kinase A	327	5	FALSE	TRUE	FALSE	TRUE	FALSE	FALSE	FALSE	FALSE	FALSE	FALSE	FALSE	FALSE	Cytoplasm	2	19	CHEMBL483158	ALISERTIB	FALSE	3	FALSE	Reactome	Regulation of TP53 Activity	7	0	1	6	0	0	39.27
AURKA	ENSG00000087586	aurora kinase A	327	5	FALSE	TRUE	FALSE	TRUE	FALSE	FALSE	FALSE	FALSE	FALSE	FALSE	FALSE	FALSE	Cytoplasm	2	19	CHEMBL482968	ENMD-2076	FALSE	2	FALSE	Reactome	Transcriptional Regulation by TP53	7	0	1	6	0	0	39.27
AURKA	ENSG00000087586	aurora kinase A	327	5	FALSE	TRUE	FALSE	TRUE	FALSE	FALSE	FALSE	FALSE	FALSE	FALSE	FALSE	FALSE	Cytoplasm	2	19	CHEMBL1980297	ILORASERTIB	FALSE	2	FALSE	Reactome	Transcriptional Regulation by TP53	7	0	1	6	0	0	39.27
AURKA	ENSG00000087586	aurora kinase A	327	5	FALSE	TRUE	FALSE	TRUE	FALSE	FALSE	FALSE	FALSE	FALSE	FALSE	FALSE	FALSE	Cytoplasm	2	19	CHEMBL482968	ENMD-2076	FALSE	2	FALSE	Reactome	APC/C:Cdh1 mediated degradation of Cdc20 and other APC/C:Cdh1 targeted proteins in late mitosis/early G1	7	0	1	6	0	0	39.27
AURKA	ENSG00000087586	aurora kinase A	327	5	FALSE	TRUE	FALSE	TRUE	FALSE	FALSE	FALSE	FALSE	FALSE	FALSE	FALSE	FALSE	Cytoplasm	2	19	CHEMBL483158	ALISERTIB	FALSE	3	FALSE	Reactome	SUMOylation	7	0	1	6	0	0	39.27
AURKA	ENSG00000087586	aurora kinase A	327	5	FALSE	TRUE	FALSE	TRUE	FALSE	FALSE	FALSE	FALSE	FALSE	FALSE	FALSE	FALSE	Cytoplasm	2	19	CHEMBL483158	ALISERTIB	FALSE	3	FALSE	Reactome	SUMOylation of DNA replication proteins	7	0	1	6	0	0	39.27
AURKA	ENSG00000087586	aurora kinase A	327	5	FALSE	TRUE	FALSE	TRUE	FALSE	FALSE	FALSE	FALSE	FALSE	FALSE	FALSE	FALSE	Cytoplasm	2	19	CHEMBL483158	ALISERTIB	FALSE	3	FALSE	Reactome	SUMOylation of DNA replication proteins	7	0	1	6	0	0	39.27
AURKA	ENSG00000087586	aurora kinase A	327	5	FALSE	TRUE	FALSE	TRUE	FALSE	FALSE	FALSE	FALSE	FALSE	FALSE	FALSE	FALSE	Cytoplasm	2	19	CHEMBL483158	ALISERTIB	FALSE	3	FALSE	Reactome	Regulation of TP53 Activity	7	0	1	6	0	0	39.27
AURKA	ENSG00000087586	aurora kinase A	327	5	FALSE	TRUE	FALSE	TRUE	FALSE	FALSE	FALSE	FALSE	FALSE	FALSE	FALSE	FALSE	Cytoplasm	2	19	CHEMBL572878	TOZASERTIB	FALSE	2	FALSE	Reactome	Transcriptional Regulation by TP53	7	0	1	6	0	0	39.27
AURKA	ENSG00000087586	aurora kinase A	327	5	FALSE	TRUE	FALSE	TRUE	FALSE	FALSE	FALSE	FALSE	FALSE	FALSE	FALSE	FALSE	Cytoplasm	2	19	CHEMBL402548	DANUSERTIB	FALSE	2	FALSE	Reactome	Transcriptional Regulation by TP53	7	0	1	6	0	0	39.27
AURKA	ENSG00000087586	aurora kinase A	327	5	FALSE	TRUE	FALSE	TRUE	FALSE	FALSE	FALSE	FALSE	FALSE	FALSE	FALSE	FALSE	Cytoplasm	2	19	CHEMBL483158	ALISERTIB	FALSE	3	FALSE	Reactome	Regulation of TP53 Activity	7	0	1	6	0	0	39.27
AURKA	ENSG00000087586	aurora kinase A	327	5	FALSE	TRUE	FALSE	TRUE	FALSE	FALSE	FALSE	FALSE	FALSE	FALSE	FALSE	FALSE	Cytoplasm	2	19	CHEMBL495727	AT-9283	FALSE	2	FALSE	Reactome	Transcriptional Regulation by TP53	7	0	1	6	0	0	39.27
AURKA	ENSG00000087586	aurora kinase A	327	5	FALSE	TRUE	FALSE	TRUE	FALSE	FALSE	FALSE	FALSE	FALSE	FALSE	FALSE	FALSE	Cytoplasm	2	19	CHEMBL482968	ENMD-2076	FALSE	2	FALSE	Reactome	Transcriptional Regulation by TP53	7	0	1	6	0	0	39.27
AURKA	ENSG00000087586	aurora kinase A	327	5	FALSE	TRUE	FALSE	TRUE	FALSE	FALSE	FALSE	FALSE	FALSE	FALSE	FALSE	FALSE	Cytoplasm	2	19	CHEMBL52885	ENMD-981693	FALSE	2	FALSE	Reactome	Transcriptional Regulation by TP53	7	0	1	6	0	0	39.27
AURKA	ENSG00000087586	aurora kinase A	327	5	FALSE	TRUE	FALSE	TRUE	FALSE	FALSE	FALSE	FALSE	FALSE	FALSE	FALSE	FALSE	Cytoplasm	2	19	CHEMBL482968	ENMD-2076	FALSE	2	FALSE	Reactome	Transcriptional Regulation by TP53	7	0	1	6	0	0	39.27
AURKA	ENSG00000087586	aurora kinase A	327	5	FALSE	TRUE	FALSE	TRUE	FALSE	FALSE	FALSE	FALSE	FALSE	FALSE	FALSE	FALSE	Cytoplasm	2	19	CHEMBL483158	ALISERTIB	FALSE	3	FALSE	Reactome	Transcriptional Regulation by TP53	7	0	1	6	0	0	39.27
AURKA	ENSG00000087586	aurora kinase A	327	5	FALSE	TRUE	FALSE	TRUE	FALSE	FALSE	FALSE	FALSE	FALSE	FALSE	FALSE	FALSE	Cytoplasm	2	19	CHEMBL482968	ENMD-2076	FALSE	2	FALSE	Reactome	Transcriptional Regulation by TP53	7	0	1	6	0	0	39.27
AURKA	ENSG00000087586	aurora kinase A	327	5	FALSE	TRUE	FALSE	TRUE	FALSE	FALSE	FALSE	FALSE	FALSE	FALSE	FALSE	FALSE	Cytoplasm	2	19	CHEMBL52885	ENMD-981693	FALSE	2	FALSE	Reactome	Regulation of TP53 Activity	7	0	1	6	0	0	39.27
AURKA	ENSG00000087586	aurora kinase A	327	5	FALSE	TRUE	FALSE	TRUE	FALSE	FALSE	FALSE	FALSE	FALSE	FALSE	FALSE	FALSE	Cytoplasm	2	19	CHEMBL482968	ENMD-2076	FALSE	2	FALSE	NCI	PLK1 signaling events	7	0	1	6	0	0	39.27
AURKA	ENSG00000087586	aurora kinase A	327	5	FALSE	TRUE	FALSE	TRUE	FALSE	FALSE	FALSE	FALSE	FALSE	FALSE	FALSE	FALSE	Cytoplasm	2	19	CHEMBL482968	ENMD-2076	FALSE	2	FALSE	Reactome	SUMOylation	7	0	1	6	0	0	39.27
AURKA	ENSG00000087586	aurora kinase A	327	5	FALSE	TRUE	FALSE	TRUE	FALSE	FALSE	FALSE	FALSE	FALSE	FALSE	FALSE	FALSE	Cytoplasm	2	19	CHEMBL483158	ALISERTIB	FALSE	3	FALSE	Reactome	Transcriptional Regulation by TP53	7	0	1	6	0	0	39.27
AURKA	ENSG00000087586	aurora kinase A	327	5	FALSE	TRUE	FALSE	TRUE	FALSE	FALSE	FALSE	FALSE	FALSE	FALSE	FALSE	FALSE	Cytoplasm	2	19	CHEMBL402548	DANUSERTIB	FALSE	2	FALSE	Reactome	SUMOylation	7	0	1	6	0	0	39.27
AURKA	ENSG00000087586	aurora kinase A	327	5	FALSE	TRUE	FALSE	TRUE	FALSE	FALSE	FALSE	FALSE	FALSE	FALSE	FALSE	FALSE	Cytoplasm	2	19	CHEMBL483158	ALISERTIB	FALSE	3	FALSE	Reactome	Regulation of TP53 Activity	7	0	1	6	0	0	39.27
AURKA	ENSG00000087586	aurora kinase A	327	5	FALSE	TRUE	FALSE	TRUE	FALSE	FALSE	FALSE	FALSE	FALSE	FALSE	FALSE	FALSE	Cytoplasm	2	19	CHEMBL572878	TOZASERTIB	FALSE	2	FALSE	Reactome	Regulation of TP53 Activity	7	0	1	6	0	0	39.27
AURKA	ENSG00000087586	aurora kinase A	327	5	FALSE	TRUE	FALSE	TRUE	FALSE	FALSE	FALSE	FALSE	FALSE	FALSE	FALSE	FALSE	Cytoplasm	2	19	CHEMBL402548	DANUSERTIB	FALSE	2	FALSE	Reactome	SUMO E3 ligases SUMOylate target proteins	7	0	1	6	0	0	39.27
AURKA	ENSG00000087586	aurora kinase A	327	5	FALSE	TRUE	FALSE	TRUE	FALSE	FALSE	FALSE	FALSE	FALSE	FALSE	FALSE	FALSE	Cytoplasm	2	19	CHEMBL52885	ENMD-981693	FALSE	2	FALSE	Reactome	Regulation of TP53 Activity	7	0	1	6	0	0	39.27
AURKA	ENSG00000087586	aurora kinase A	327	5	FALSE	TRUE	FALSE	TRUE	FALSE	FALSE	FALSE	FALSE	FALSE	FALSE	FALSE	FALSE	Cytoplasm	2	19	CHEMBL483158	ALISERTIB	FALSE	3	FALSE	Reactome	Transcriptional Regulation by TP53	7	0	1	6	0	0	39.27
AURKA	ENSG00000087586	aurora kinase A	327	5	FALSE	TRUE	FALSE	TRUE	FALSE	FALSE	FALSE	FALSE	FALSE	FALSE	FALSE	FALSE	Cytoplasm	2	19	CHEMBL482968	ENMD-2076	FALSE	2	FALSE	Reactome	SUMOylation	7	0	1	6	0	0	39.27
AURKA	ENSG00000087586	aurora kinase A	327	5	FALSE	TRUE	FALSE	TRUE	FALSE	FALSE	FALSE	FALSE	FALSE	FALSE	FALSE	FALSE	Cytoplasm	2	19	CHEMBL482968	ENMD-2076	FALSE	2	FALSE	Reactome	Regulation of TP53 Activity	7	0	1	6	0	0	39.27
AURKA	ENSG00000087586	aurora kinase A	327	5	FALSE	TRUE	FALSE	TRUE	FALSE	FALSE	FALSE	FALSE	FALSE	FALSE	FALSE	FALSE	Cytoplasm	2	19	CHEMBL1980297	ILORASERTIB	FALSE	2	FALSE	Reactome	SUMOylation	7	0	1	6	0	0	39.27
AURKA	ENSG00000087586	aurora kinase A	327	5	FALSE	TRUE	FALSE	TRUE	FALSE	FALSE	FALSE	FALSE	FALSE	FALSE	FALSE	FALSE	Cytoplasm	2	19	CHEMBL483158	ALISERTIB	FALSE	3	FALSE	Reactome	Regulation of TP53 Activity	7	0	1	6	0	0	39.27
AURKA	ENSG00000087586	aurora kinase A	327	5	FALSE	TRUE	FALSE	TRUE	FALSE	FALSE	FALSE	FALSE	FALSE	FALSE	FALSE	FALSE	Cytoplasm	2	19	CHEMBL52885	ENMD-981693	FALSE	2	FALSE	Reactome	SUMO E3 ligases SUMOylate target proteins	7	0	1	6	0	0	39.27
AURKA	ENSG00000087586	aurora kinase A	327	5	FALSE	TRUE	FALSE	TRUE	FALSE	FALSE	FALSE	FALSE	FALSE	FALSE	FALSE	FALSE	Cytoplasm	2	19	CHEMBL495727	AT-9283	FALSE	2	FALSE	Reactome	SUMOylation	7	0	1	6	0	0	39.27
AURKA	ENSG00000087586	aurora kinase A	327	5	FALSE	TRUE	FALSE	TRUE	FALSE	FALSE	FALSE	FALSE	FALSE	FALSE	FALSE	FALSE	Cytoplasm	2	19	CHEMBL495727	AT-9283	FALSE	2	FALSE	Reactome	APC/C:Cdh1 mediated degradation of Cdc20 and other APC/C:Cdh1 targeted proteins in late mitosis/early G1	7	0	1	6	0	0	39.27
AURKA	ENSG00000087586	aurora kinase A	327	5	FALSE	TRUE	FALSE	TRUE	FALSE	FALSE	FALSE	FALSE	FALSE	FALSE	FALSE	FALSE	Cytoplasm	2	19	CHEMBL402548	DANUSERTIB	FALSE	2	FALSE	Reactome	APC/C:Cdh1 mediated degradation of Cdc20 and other APC/C:Cdh1 targeted proteins in late mitosis/early G1	7	0	1	6	0	0	39.27
AURKA	ENSG00000087586	aurora kinase A	327	5	FALSE	TRUE	FALSE	TRUE	FALSE	FALSE	FALSE	FALSE	FALSE	FALSE	FALSE	FALSE	Cytoplasm	2	19	CHEMBL483158	ALISERTIB	FALSE	3	FALSE	Reactome	Transcriptional Regulation by TP53	7	0	1	6	0	0	39.27
AURKA	ENSG00000087586	aurora kinase A	327	5	FALSE	TRUE	FALSE	TRUE	FALSE	FALSE	FALSE	FALSE	FALSE	FALSE	FALSE	FALSE	Cytoplasm	2	19	CHEMBL572878	TOZASERTIB	FALSE	2	FALSE	Reactome	SUMO E3 ligases SUMOylate target proteins	7	0	1	6	0	0	39.27
AURKA	ENSG00000087586	aurora kinase A	327	5	FALSE	TRUE	FALSE	TRUE	FALSE	FALSE	FALSE	FALSE	FALSE	FALSE	FALSE	FALSE	Cytoplasm	2	19	CHEMBL482968	ENMD-2076	FALSE	2	FALSE	Reactome	APC/C:Cdh1 mediated degradation of Cdc20 and other APC/C:Cdh1 targeted proteins in late mitosis/early G1	7	0	1	6	0	0	39.27
AURKA	ENSG00000087586	aurora kinase A	327	5	FALSE	TRUE	FALSE	TRUE	FALSE	FALSE	FALSE	FALSE	FALSE	FALSE	FALSE	FALSE	Cytoplasm	2	19	CHEMBL52885	ENMD-981693	FALSE	2	FALSE	Reactome	Regulation of TP53 Activity	7	0	1	6	0	0	39.27
AURKA	ENSG00000087586	aurora kinase A	327	5	FALSE	TRUE	FALSE	TRUE	FALSE	FALSE	FALSE	FALSE	FALSE	FALSE	FALSE	FALSE	Cytoplasm	2	19	CHEMBL483158	ALISERTIB	FALSE	3	FALSE	Reactome	APC/C:Cdh1 mediated degradation of Cdc20 and other APC/C:Cdh1 targeted proteins in late mitosis/early G1	7	0	1	6	0	0	39.27
AURKA	ENSG00000087586	aurora kinase A	327	5	FALSE	TRUE	FALSE	TRUE	FALSE	FALSE	FALSE	FALSE	FALSE	FALSE	FALSE	FALSE	Cytoplasm	2	19	CHEMBL483158	ALISERTIB	FALSE	3	FALSE	Reactome	APC/C:Cdh1 mediated degradation of Cdc20 and other APC/C:Cdh1 targeted proteins in late mitosis/early G1	7	0	1	6	0	0	39.27
AURKA	ENSG00000087586	aurora kinase A	327	5	FALSE	TRUE	FALSE	TRUE	FALSE	FALSE	FALSE	FALSE	FALSE	FALSE	FALSE	FALSE	Cytoplasm	2	19	CHEMBL483158	ALISERTIB	FALSE	3	FALSE	Reactome	SUMOylation	7	0	1	6	0	0	39.27
AURKA	ENSG00000087586	aurora kinase A	327	5	FALSE	TRUE	FALSE	TRUE	FALSE	FALSE	FALSE	FALSE	FALSE	FALSE	FALSE	FALSE	Cytoplasm	2	19	CHEMBL402548	DANUSERTIB	FALSE	2	FALSE	Reactome	Regulation of TP53 Activity	7	0	1	6	0	0	39.27
AURKA	ENSG00000087586	aurora kinase A	327	5	FALSE	TRUE	FALSE	TRUE	FALSE	FALSE	FALSE	FALSE	FALSE	FALSE	FALSE	FALSE	Cytoplasm	2	19	CHEMBL482968	ENMD-2076	FALSE	2	FALSE	Reactome	SUMOylation of DNA replication proteins	7	0	1	6	0	0	39.27
AURKA	ENSG00000087586	aurora kinase A	327	5	FALSE	TRUE	FALSE	TRUE	FALSE	FALSE	FALSE	FALSE	FALSE	FALSE	FALSE	FALSE	Cytoplasm	2	19	CHEMBL482968	ENMD-2076	FALSE	2	FALSE	Reactome	SUMO E3 ligases SUMOylate target proteins	7	0	1	6	0	0	39.27
AURKA	ENSG00000087586	aurora kinase A	327	5	FALSE	TRUE	FALSE	TRUE	FALSE	FALSE	FALSE	FALSE	FALSE	FALSE	FALSE	FALSE	Cytoplasm	2	19	CHEMBL483158	ALISERTIB	FALSE	3	FALSE	Reactome	APC/C:Cdh1 mediated degradation of Cdc20 and other APC/C:Cdh1 targeted proteins in late mitosis/early G1	7	0	1	6	0	0	39.27
AURKA	ENSG00000087586	aurora kinase A	327	5	FALSE	TRUE	FALSE	TRUE	FALSE	FALSE	FALSE	FALSE	FALSE	FALSE	FALSE	FALSE	Cytoplasm	2	19	CHEMBL483158	ALISERTIB	FALSE	3	FALSE	Reactome	APC/C:Cdh1 mediated degradation of Cdc20 and other APC/C:Cdh1 targeted proteins in late mitosis/early G1	7	0	1	6	0	0	39.27
AURKA	ENSG00000087586	aurora kinase A	327	5	FALSE	TRUE	FALSE	TRUE	FALSE	FALSE	FALSE	FALSE	FALSE	FALSE	FALSE	FALSE	Cytoplasm	2	19	CHEMBL402548	DANUSERTIB	FALSE	2	FALSE	Reactome	APC/C:Cdh1 mediated degradation of Cdc20 and other APC/C:Cdh1 targeted proteins in late mitosis/early G1	7	0	1	6	0	0	39.27
AURKA	ENSG00000087586	aurora kinase A	327	5	FALSE	TRUE	FALSE	TRUE	FALSE	FALSE	FALSE	FALSE	FALSE	FALSE	FALSE	FALSE	Cytoplasm	2	19	CHEMBL483158	ALISERTIB	FALSE	3	FALSE	NCI	PLK1 signaling events	7	0	1	6	0	0	39.27
AURKA	ENSG00000087586	aurora kinase A	327	5	FALSE	TRUE	FALSE	TRUE	FALSE	FALSE	FALSE	FALSE	FALSE	FALSE	FALSE	FALSE	Cytoplasm	2	19	CHEMBL483158	ALISERTIB	FALSE	3	FALSE	Reactome	SUMOylation of DNA replication proteins	7	0	1	6	0	0	39.27
AURKA	ENSG00000087586	aurora kinase A	327	5	FALSE	TRUE	FALSE	TRUE	FALSE	FALSE	FALSE	FALSE	FALSE	FALSE	FALSE	FALSE	Cytoplasm	2	19	CHEMBL482968	ENMD-2076	FALSE	2	FALSE	Reactome	SUMO E3 ligases SUMOylate target proteins	7	0	1	6	0	0	39.27
AURKA	ENSG00000087586	aurora kinase A	327	5	FALSE	TRUE	FALSE	TRUE	FALSE	FALSE	FALSE	FALSE	FALSE	FALSE	FALSE	FALSE	Cytoplasm	2	19	CHEMBL483158	ALISERTIB	FALSE	3	FALSE	Reactome	Regulation of TP53 Activity	7	0	1	6	0	0	39.27
AURKA	ENSG00000087586	aurora kinase A	327	5	FALSE	TRUE	FALSE	TRUE	FALSE	FALSE	FALSE	FALSE	FALSE	FALSE	FALSE	FALSE	Cytoplasm	2	19	CHEMBL572878	TOZASERTIB	FALSE	2	FALSE	Reactome	APC/C:Cdh1 mediated degradation of Cdc20 and other APC/C:Cdh1 targeted proteins in late mitosis/early G1	7	0	1	6	0	0	39.27
AURKA	ENSG00000087586	aurora kinase A	327	5	FALSE	TRUE	FALSE	TRUE	FALSE	FALSE	FALSE	FALSE	FALSE	FALSE	FALSE	FALSE	Cytoplasm	2	19	CHEMBL483158	ALISERTIB	FALSE	3	FALSE	Reactome	APC/C:Cdh1 mediated degradation of Cdc20 and other APC/C:Cdh1 targeted proteins in late mitosis/early G1	7	0	1	6	0	0	39.27
AURKA	ENSG00000087586	aurora kinase A	327	5	FALSE	TRUE	FALSE	TRUE	FALSE	FALSE	FALSE	FALSE	FALSE	FALSE	FALSE	FALSE	Cytoplasm	2	19	CHEMBL482968	ENMD-2076	FALSE	2	FALSE	Reactome	SUMO E3 ligases SUMOylate target proteins	7	0	1	6	0	0	39.27
AURKA	ENSG00000087586	aurora kinase A	327	5	FALSE	TRUE	FALSE	TRUE	FALSE	FALSE	FALSE	FALSE	FALSE	FALSE	FALSE	FALSE	Cytoplasm	2	19	CHEMBL402548	DANUSERTIB	FALSE	2	FALSE	Reactome	APC/C:Cdh1 mediated degradation of Cdc20 and other APC/C:Cdh1 targeted proteins in late mitosis/early G1	7	0	1	6	0	0	39.27
AURKA	ENSG00000087586	aurora kinase A	327	5	FALSE	TRUE	FALSE	TRUE	FALSE	FALSE	FALSE	FALSE	FALSE	FALSE	FALSE	FALSE	Cytoplasm	2	19	CHEMBL402548	DANUSERTIB	FALSE	2	FALSE	Reactome	Regulation of TP53 Activity	7	0	1	6	0	0	39.27
AURKA	ENSG00000087586	aurora kinase A	327	5	FALSE	TRUE	FALSE	TRUE	FALSE	FALSE	FALSE	FALSE	FALSE	FALSE	FALSE	FALSE	Cytoplasm	2	19	CHEMBL482968	ENMD-2076	FALSE	2	FALSE	Reactome	APC/C:Cdh1 mediated degradation of Cdc20 and other APC/C:Cdh1 targeted proteins in late mitosis/early G1	7	0	1	6	0	0	39.27
AURKA	ENSG00000087586	aurora kinase A	327	5	FALSE	TRUE	FALSE	TRUE	FALSE	FALSE	FALSE	FALSE	FALSE	FALSE	FALSE	FALSE	Cytoplasm	2	19	CHEMBL402548	DANUSERTIB	FALSE	2	FALSE	NCI	PLK1 signaling events	7	0	1	6	0	0	39.27
AURKA	ENSG00000087586	aurora kinase A	327	5	FALSE	TRUE	FALSE	TRUE	FALSE	FALSE	FALSE	FALSE	FALSE	FALSE	FALSE	FALSE	Cytoplasm	2	19	CHEMBL483158	ALISERTIB	FALSE	3	FALSE	Reactome	Transcriptional Regulation by TP53	7	0	1	6	0	0	39.27
AURKA	ENSG00000087586	aurora kinase A	327	5	FALSE	TRUE	FALSE	TRUE	FALSE	FALSE	FALSE	FALSE	FALSE	FALSE	FALSE	FALSE	Cytoplasm	2	19	CHEMBL52885	ENMD-981693	FALSE	2	FALSE	Reactome	SUMOylation	7	0	1	6	0	0	39.27
AURKA	ENSG00000087586	aurora kinase A	327	5	FALSE	TRUE	FALSE	TRUE	FALSE	FALSE	FALSE	FALSE	FALSE	FALSE	FALSE	FALSE	Cytoplasm	2	19	CHEMBL1980297	ILORASERTIB	FALSE	2	FALSE	Reactome	APC/C:Cdh1 mediated degradation of Cdc20 and other APC/C:Cdh1 targeted proteins in late mitosis/early G1	7	0	1	6	0	0	39.27
AURKA	ENSG00000087586	aurora kinase A	327	5	FALSE	TRUE	FALSE	TRUE	FALSE	FALSE	FALSE	FALSE	FALSE	FALSE	FALSE	FALSE	Cytoplasm	2	19	CHEMBL52885	ENMD-981693	FALSE	2	FALSE	Reactome	APC/C:Cdh1 mediated degradation of Cdc20 and other APC/C:Cdh1 targeted proteins in late mitosis/early G1	7	0	1	6	0	0	39.27
AURKA	ENSG00000087586	aurora kinase A	327	5	FALSE	TRUE	FALSE	TRUE	FALSE	FALSE	FALSE	FALSE	FALSE	FALSE	FALSE	FALSE	Cytoplasm	2	19	CHEMBL495727	AT-9283	FALSE	2	FALSE	Reactome	SUMO E3 ligases SUMOylate target proteins	7	0	1	6	0	0	39.27
[truncated: 36,048 more rows]
